# Supplementary material for: Identification and engineering of potent cyclic peptides with selective or promiscuous binding through biochemical profiling and bioinformatic data analysis
Source: RSC Chem Biol. 2023 Nov 14;5(1):12–8. doi: 10.1039/d3cb00168g (PMC10763615; doi:10.1039/d3cb00168g)
Supplement: CB-005-D3CB00168G-s003 [file CB-005-D3CB00168G-s003.xlsx]

## Sheet: NNK selections NGS
Sequence	R0	FGFR1C.R1	FGFR1C.R2	FGFR1C.R3	FGFR1C.R4	FGFR1C.R5	FGFR3C.R1	FGFR3C.R2	FGFR3C.R3	FGFR3C.R4	FGFR3C.R5	FGFR4.R1	FGFR4.R2	FGFR4.R3	FGFR4.R4	FGFR4.R5
MCRLCFSKLFWCC	1	2835	3916	34692	344735	326979	0	0	0	0	0	11	4	245	16	20
MCFVYPRRQPLYWIC	0	1354	1897	24680	197174	146814	0	0	0	0	0	4	0	19	0	0
MCFRWRLFHHLTPYC	0	1230	1918	18963	179610	132728	0	0	0	0	0	11	2	46	2	8
MCIYRLSDFWVVC	0	1214	1986	15150	170479	125943	0	0	0	0	0	3	10	3844	528	2086
MCIRWPARQSLFWLC	0	809	1474	16386	112634	77810	0	0	0	0	0	5	0	13	0	0
MCYVCFSHSFICC	0	547	1447	19090	87418	59512	0	0	0	0	0	3	0	12	0	0
MCSNMWKLANRWWAC	0	591	1596	14951	122607	59490	0	0	0	0	0	3	0	30	0	0
MCSNMWKLANRWWVC	0	331	351	1781	35906	48223	0	0	0	0	0	0	0	79	2	8
MCCYRCWSLFWCC	1	390	459	3356	42186	47826	0	0	0	0	0	0	2	300	11	25
MCTRTSFYGFWYYAC	0	424	1638	12514	94034	37796	0	0	0	0	0	0	2	1327	186	659
MCYRHPHSNPLFWAC	0	392	1344	11755	58392	37507	0	0	0	0	0	0	0	4	0	0
MCCYNLFSLFWAC	0	336	1017	8461	65349	34546	0	0	0	0	0	0	0	12	0	0
MCYKWPIRSHLYWLC	0	382	919	10931	83010	33861	0	0	0	0	0	5	0	12	0	0
MCTKFPWPFPIFWAC	0	385	1120	14282	68866	33486	0	0	0	0	0	3	0	6	0	0
MCVRWPNLNALFWLC	0	291	820	9170	47872	28190	0	0	0	0	0	0	0	6	0	0
MCWYCFRKSFWCC	0	321	863	11676	79941	24377	0	0	0	0	0	3	0	6	0	0
MCFVCFRHSFLCC	0	259	876	9880	65079	22064	0	0	0	0	0	4	0	4	0	5
MCFRWRLFHHLTPFC	0	155	175	1106	16245	19769	0	0	0	0	0	0	0	406	44	164
MCCTRFVNLFWLC	0	221	695	7405	43568	19519	0	0	0	0	0	0	0	3	0	0
MCLLWTRHFDRYWVC	0	194	666	5837	45445	17383	0	0	0	0	0	0	0	0	2	0
MCIGKWYTYQYWTRC	0	136	654	5689	46079	11391	0	0	0	0	0	0	0	2	0	0
MCCFKFRDLFWVC	0	139	463	4781	28356	11292	0	0	0	0	0	0	0	6	0	4
MCVPCFSHTFLCC	0	125	678	9799	24231	10799	0	0	0	0	0	0	0	4	0	0
MCIRWPARQPLFWLC	0	86	96	699	7462	10574	0	0	0	0	0	0	0	4	0	0
MCFRCFLASFWCC	0	115	543	5916	26044	7663	0	0	0	0	0	0	0	0	0	0
MCFVYPRRQPLYWLC	0	62	47	114	3719	5480	0	0	0	0	0	0	0	0	0	0
MCYKCFTGLFLCC	0	67	319	2709	13827	5124	0	0	0	0	0	0	0	3	0	0
MCFVCFRHSFWCC	0	29	35	122	3685	4899	0	0	0	0	0	0	0	0	0	0
MCFVYPRRQPLYWVC	0	40	38	299	3975	4509	0	0	0	0	0	0	0	0	0	0
MCSQSWVLYELWRVC	0	44	692	2373	10803	4101	0	0	0	0	0	0	0	3	0	0
MCRLCFSRLFWCC	0	33	38	383	3739	3352	0	0	0	0	0	0	0	3	0	0
MCYRFPSSRHLFWAC	0	40	435	4359	13012	3149	0	0	0	0	0	3	0	0	0	0
MCYRHPHSNPLFWVC	0	23	35	358	2623	2963	0	0	0	0	0	0	0	0	0	0
MCCVRYLARFWLC	0	56	420	3436	9781	2809	0	0	0	0	0	0	0	0	0	0
MCWSLYRLFWAC	0	34	442	2679	10635	2788	0	0	0	0	0	0	0	3	0	0
MCRLCFSKLFWYC	0	24	43	227	2997	2650	0	0	0	0	0	0	0	0	0	0
MCIRWPARQSLFWIC	0	24	26	125	1987	2615	0	0	0	0	0	0	0	0	0	0
MCTKFPWPFPIFWVC	0	12	38	415	3107	2552	0	0	0	0	0	0	0	0	0	0
MCRLCFNKLFWCC	0	22	27	169	2416	2551	0	0	0	0	0	0	0	18	0	3
MCYVCFEHRFLCC	0	38	187	1526	7091	2397	0	0	0	0	0	0	0	0	0	0
MCFRWRLFHHLTPCC	0	20	36	215	4022	2322	0	0	0	0	0	0	0	2	0	0
MCRLCFSKLFWLC	0	29	27	97	4050	2162	0	0	0	0	0	0	0	0	0	2
MCFHCFASRFWCC	0	34	260	2177	7905	2160	0	0	0	0	0	0	0	2	0	2
MCCTPCYGLFHCC	0	17	103	867	4049	1969	0	0	0	0	0	0	0	2	0	0
MCHLCFSKLFWCC	0	15	24	127	1796	1952	0	0	0	0	0	0	0	2	0	0
MCFAYPRRQPLYWIC	0	10	17	299	2228	1905	0	0	0	0	0	0	0	0	0	0
MCRLCFSKLFWWC	0	20	42	332	3132	1893	0	0	0	0	0	0	0	0	0	0
MCTKFPWPFPIFWCC	0	26	21	66	2599	1774	0	0	0	0	0	0	0	0	0	0
MCRLCFGKLFWCC	0	20	16	171	2127	1724	0	0	0	0	0	0	0	0	0	0
MCSYGSWYGYSYLAC	0	37	328	2128	9857	1699	0	0	0	0	0	0	0	0	0	0
MCTKFPWPFPIFWLC	0	10	13	63	1028	1665	0	0	0	0	0	0	0	0	0	0
MCVRWRYWPAWLC	0	42	396	2828	9520	1608	0	0	0	0	0	0	0	0	0	0
MCCFKFRDLFWIC	0	10	16	190	1975	1582	0	0	0	0	0	0	0	0	2	0
MCVRWPARQSLFWLC	0	13	34	621	2536	1563	0	0	0	0	0	0	0	0	0	0
MCIRWPARQSLFWCC	0	20	17	71	2373	1557	0	0	0	0	0	0	0	0	0	0
MCYICFSGLFYCC	0	25	202	1155	4846	1406	0	0	0	0	0	0	0	0	0	0
MCFRWRLLHHLTPYC	0	14	20	237	2231	1383	0	0	0	0	0	0	0	0	0	0
MCVRCFDQLFWCC	0	20	187	1297	5178	1296	0	0	0	0	0	0	0	2	0	0
MCLRWRLFHHLTPYC	0	10	23	243	1849	1288	0	0	0	0	0	0	0	0	0	0
MCPLWTRHFDRYWVC	0	11	10	171	1905	1255	0	0	0	0	0	0	0	0	0	0
MCSNMWKLANRWWIC	0	10	8	22	815	1255	0	0	0	0	0	0	0	0	0	0
MCPNMWKLANRWWAC	0	12	20	229	2225	1241	0	0	0	0	0	0	0	0	0	0
MCFVYPRRQPLYWMC	0	17	24	343	2701	1226	0	0	0	0	0	0	0	0	0	0
MCWHCFRKSFWCC	0	10	12	198	2232	1205	0	0	0	0	0	0	0	0	0	0
MCTRTSFYGFRYYAC	0	12	30	232	2439	1198	0	0	0	0	0	0	0	37	0	10
MCRLCFRKLFWCC	0	8	11	65	1145	1157	0	0	0	0	0	0	0	0	0	0
MCYRHPHSNPLFWCC	0	16	9	40	1429	1130	0	0	0	0	0	0	0	0	0	0
MCFSCFCHTFYCC	0	27	243	2359	6207	1074	0	0	0	0	1	0	0	0	0	0
MCCLCFSKLFWCC	0	7	9	110	1152	1052	0	0	0	0	0	0	0	0	0	0
MCIGKWYTYQYWTHC	0	7	29	267	2773	1042	0	0	0	0	0	0	0	0	0	0
MCRLCFSKLLWCC	0	12	20	192	1285	1010	0	0	0	0	0	0	0	2	0	0
MCYVCFRHSFLCC	0	4	23	233	2068	1006	0	0	0	0	0	0	0	0	0	0
MCVRWPNLNALFWCC	0	16	11	40	2143	995	0	0	0	0	0	0	0	0	0	0
MCVYRLSDFWVVC	0	10	22	148	1755	973	0	0	0	0	0	0	0	37	9	32
MCRLCFSKLFWAC	0	16	21	51	2102	929	0	0	0	0	0	0	0	0	0	0
MCRLCFSKLFLCC	0	9	9	112	1836	919	0	0	0	0	0	0	0	0	0	0
MCYVYPRRQPLYWIC	0	8	7	104	1022	893	0	0	0	0	0	0	0	0	0	0
MCFVYPRRQPLFWLC	0	8	9	9	324	873	0	0	0	0	0	0	0	0	0	0
MCRLCFSKPFWCC	0	11	8	180	1190	858	0	0	0	0	0	0	0	0	0	0
MCIYRLSDFWCC	0	13	6	21	1872	835	0	0	0	0	0	0	0	0	0	0
MCFRFPTRCPLFLLC	0	26	206	2952	5552	824	0	0	0	0	0	0	0	0	0	0
MCCYNLFSLFWCC	0	12	10	31	1574	819	0	0	0	0	0	0	0	0	0	0
MCFVCFRASFLCC	0	20	324	1953	4800	798	0	0	0	0	0	0	0	0	0	0
MCFVYPRRQPLYWCC	0	7	10	25	1170	782	0	0	0	0	0	0	0	0	0	0
MCFVYPRRQPLFWVC	0	4	8	8	285	779	0	0	0	0	0	0	0	0	0	0
MCYRHPHSNPLFWLC	0	6	8	20	673	776	0	0	0	0	0	0	0	0	0	0
MCFRWRLFRHLTPYC	0	9	13	112	1218	722	0	0	0	0	0	0	0	0	0	0
MCFVYPRRQPLFWIC	0	7	3	51	455	717	0	0	0	0	0	0	0	4	0	0
MCYKWPIRSHLYWIC	0	8	7	25	1106	717	0	0	0	0	0	0	0	2	0	0
MCLLWTRHFDRYWIC	0	7	8	59	1061	714	0	0	0	0	0	0	0	0	0	0
MCCFKLCSLFWVC	0	16	229	1945	4630	702	0	0	0	0	0	0	0	0	0	0
MCLFHRLYWLVPC	0	9	236	1241	3401	699	0	0	0	0	0	0	0	0	0	0
MCRLCLSKLFWCC	0	7	14	162	1037	692	0	0	0	0	0	0	0	2	0	0
MCILHGLIYWAPKQC	0	10	197	540	2052	682	0	0	0	0	0	0	0	0	0	0
MCPNMWKLANRWWVC	0	6	5	16	450	682	0	0	0	0	0	0	0	0	0	0
MCRLCFSKLFWRC	0	8	16	181	1155	679	0	0	0	0	0	0	0	0	0	0
MCFVYPRRRPLYWIC	0	12	9	151	1107	668	0	0	0	0	0	0	0	0	0	0
MCRLCFSKLFRCC	0	8	13	136	903	663	0	0	0	0	0	0	0	0	0	0
MCYKWPIRSHLYWVC	0	6	8	40	792	653	0	0	0	0	0	0	0	0	0	0
MCIRWPARQSLFWVC	0	10	2	20	526	646	0	0	0	0	0	0	0	0	0	0
MCRLCFSKHFWCC	0	6	7	64	722	643	0	0	0	0	0	0	0	0	0	0
MCFRWRLSHHLTPYC	0	6	10	153	1205	641	0	0	0	0	0	0	0	0	0	0
MCIRWPARQSLFWRC	0	10	11	107	1070	627	0	0	0	0	0	0	0	0	0	0
MCYKWPIRSHLYWCC	0	8	9	52	1304	624	0	0	0	0	0	0	0	0	0	0
MCFRCFACLFWCC	0	17	201	2587	4354	608	0	0	0	0	0	0	0	0	0	0
MCRLCFCKLFWCC	0	2	4	52	676	593	0	0	0	0	0	0	0	2	0	0
MCIRWPARRSLFWLC	0	4	6	119	903	591	0	0	0	0	0	0	0	0	0	0
MCRRWPSREALYWLC	0	12	169	1003	4230	578	0	0	0	0	0	0	0	0	0	0
MCYVCFSRSFICC	0	4	6	116	637	578	0	0	0	0	0	0	0	0	0	0
MCRLCFSKRFWCC	0	3	3	22	502	568	0	0	0	0	0	0	0	0	0	0
MCCTRFVNLFWCC	0	9	8	31	1572	563	0	0	0	0	0	0	0	0	0	0
MCIYRLSDFWVAC	0	9	16	136	1068	560	0	0	0	0	0	0	0	52	11	34
MCFSCFSKQFWCC	0	11	133	936	2737	559	0	0	0	0	0	0	0	3	0	0
MCIRWLNKYWLC	0	11	101	932	3184	545	0	0	0	0	0	0	0	0	0	0
MCFSCFRHTFYCC	0	6	8	119	852	529	0	0	0	0	0	0	0	0	0	0
MCYRWRLFHHLTPYC	0	4	5	63	747	528	0	0	0	0	0	0	0	0	0	0
MCFVYPRRQPLYWSC	0	11	4	154	1323	521	0	0	0	0	0	0	0	0	0	0
MCSLCFSKLFWCC	0	3	5	58	497	521	0	0	0	0	0	0	0	0	0	0
MCRSCFSKLFWCC	0	8	10	115	823	520	0	0	0	0	0	0	0	0	0	0
MCLICFRRLFYCC	0	17	201	1939	4323	517	0	0	0	0	0	0	0	2	0	0
MCCFKLRDLFWVC	0	3	10	134	970	511	0	0	0	0	0	0	0	0	0	0
MCLNMWKLANRWWAC	0	4	9	67	892	505	0	0	0	0	0	0	0	0	0	0
MCRLRFSKLFWCC	0	7	8	120	729	501	0	0	0	0	0	0	0	0	0	0
MCLRWRLFHHLTPFC	0	1	3	25	366	486	0	0	0	0	0	0	0	4	0	3
MCCFKFRDLFWCC	0	6	9	22	992	483	0	0	0	0	0	0	0	0	0	0
MCARTSFYGFWYYAC	0	4	11	189	1308	479	0	0	0	0	0	0	0	14	6	6
MCIRWPARQSLFWAC	0	5	8	8	597	478	0	0	0	0	0	0	0	0	0	0
MCKYHRVFYLAPLSC	0	7	114	439	1952	477	0	0	0	0	0	0	0	0	0	0
MCYKWPTRSHLYWLC	0	5	3	160	1218	477	0	0	0	0	0	0	0	0	0	0
MCYKWPIRSPLYWLC	0	4	4	18	300	476	0	0	0	0	0	0	0	0	0	0
MCFRWRLFHHLAPYC	0	4	6	94	792	472	0	0	0	0	0	0	0	0	0	0
MCRLCFSKLFWSC	0	5	9	174	824	467	0	0	0	0	0	0	0	2	0	0
MCRLCFSKLFWC	0	3	1	59	540	463	0	0	0	0	0	0	0	0	0	0
MCRLCFSKLFCCC	0	4	12	53	534	461	0	0	0	0	0	0	0	0	0	0
MCIRWPARQSLYWIC	0	5	3	14	373	457	0	0	0	0	0	0	0	0	0	0
MCLVYPRRQPLYWIC	0	5	9	143	783	456	0	0	0	0	0	0	0	0	0	0
MCRLCFSKLFWIC	0	6	7	11	629	448	0	0	0	0	0	0	0	0	0	0
MCYRHPHNNPLFWAC	0	2	11	59	554	447	0	0	0	0	0	0	0	0	0	0
MCFVYPRRQPMYWIC	0	6	3	52	604	446	0	0	0	0	0	0	0	0	0	0
MCFVYPRRQPLFWAC	0	8	3	7	331	445	0	0	0	0	0	0	0	0	0	0
MCTRTSFYGFWYHAC	0	2	9	113	961	442	0	0	0	0	0	0	0	67	13	85
MCIGKWYTYRYWTRC	0	5	10	78	1107	437	0	0	0	0	0	0	0	0	0	0
MCAKFPWPFPIFWAC	0	4	8	181	858	419	0	0	0	0	0	0	0	0	0	0
MCLPCFSHLFLCC	0	11	208	1446	2219	418	0	0	0	0	0	0	0	0	0	0
MCRLCFSKLSWCC	0	6	6	130	648	411	0	0	0	0	0	0	0	2	0	0
MCRKYPWNTAMYWLC	0	16	251	1638	3905	407	0	0	0	0	0	0	0	0	0	0
MCRLCSSKLFWCC	0	9	3	92	585	398	0	0	0	0	0	0	0	0	0	0
MCFLCFSKQFWCC	0	3	0	20	346	394	0	0	0	0	0	0	0	0	0	0
MCIRWPARQSLLWLC	0	3	4	143	672	387	0	0	0	0	0	0	0	0	0	0
MCSNMWKLANRWCC	0	5	5	15	665	380	0	0	0	0	0	0	0	0	0	0
MCRLCFSKLFWCS	0	2	3	43	409	376	0	0	0	0	0	0	0	0	0	0
MCCYRCWSLFWYC	0	4	5	11	306	372	0	0	0	0	0	0	0	0	0	0
MCIYRLSDFWAVC	0	3	7	84	665	370	0	0	0	0	0	0	0	111	20	76
MCRLCFSELFWCC	0	7	6	57	545	366	0	0	0	0	0	0	0	0	0	0
MCSRTSFYGFWYYAC	0	4	4	44	611	362	0	0	0	0	0	0	0	20	6	6
MCFVYPRRQPLYWTC	0	5	14	163	939	360	0	0	0	0	0	0	0	0	0	0
MCIRWPARQSLFWPC	0	4	16	183	894	360	0	0	0	0	0	0	0	0	0	0
MCRLCFSKLFWFC	0	3	14	69	486	355	0	0	0	0	0	0	0	0	0	0
MCRLCFSKLYWCC	0	4	8	52	514	353	0	0	0	0	0	0	0	0	0	0
MCFVYPRRQPLYRIC	0	2	7	120	600	351	0	0	0	0	0	0	0	0	0	0
MCFVYPRHQPLYWIC	0	6	7	43	421	350	0	0	0	0	0	0	0	0	0	0
MCIYRLSDFWAC	0	9	11	13	858	350	0	0	0	0	0	0	0	0	0	0
MCRLCFSKLFWVC	0	6	9	9	679	347	0	0	0	0	0	0	0	0	0	0
MCRMCFSKLFWCC	0	3	2	47	427	346	0	0	0	0	0	0	0	0	0	0
MCTRTSFYGFWYYVC	0	1	8	72	765	342	0	0	0	0	0	0	0	10	4	4
MCIYRLSDFWLC	0	7	6	13	862	333	0	0	0	0	0	0	0	0	0	0
MCRPYPRFQPLFLLC	0	3	8	74	702	333	0	0	0	0	0	0	0	0	0	0
MCTRWPARQSLFWLC	0	7	10	93	667	331	0	0	0	0	0	0	0	0	0	0
MCCYNLFSLFWVC	0	8	7	54	849	330	0	0	0	0	0	0	0	0	0	0
MCFIYPRRQPLYWIC	0	4	2	34	383	325	0	0	0	0	0	0	0	0	0	0
MCIRWPARQSLYWLC	0	5	2	28	431	323	0	0	0	0	0	0	0	0	0	0
MCIYRLSDLWVVC	0	2	8	89	553	319	0	0	0	0	0	0	0	14	6	7
MCIRWPARRPLFWLC	0	2	1	17	233	316	0	0	0	0	0	0	0	0	0	0
MCCFKLCSLFWAC	0	1	13	191	863	315	0	0	0	0	0	0	0	0	0	0
MCFRWRLFNHLTPYC	0	3	4	27	335	314	0	0	0	0	0	0	0	0	0	0
MCYVCFSHTFICC	0	3	5	36	383	314	0	0	0	0	0	0	0	0	0	0
MCIRWPARQPLFWCC	0	4	0	6	146	313	0	0	0	0	0	0	0	0	0	0
MCIYRLSDFCVVC	0	2	6	59	480	307	0	0	0	0	0	0	0	2	0	3
MCSVYPRRQPLYWIC	0	2	3	112	520	306	0	0	0	0	0	0	0	0	0	0
MCIYRLSDFWVLC	0	5	7	71	615	305	0	0	0	0	0	0	0	11	0	9
MCTYRLSDFWVVC	0	5	6	77	594	305	0	0	0	0	0	0	0	26	6	12
MCIGRWYTYQYWTRC	0	3	5	55	673	304	0	0	0	0	0	0	0	0	0	0
MCTRTNFYGFWYYAC	0	6	1	31	369	301	0	0	0	0	0	0	0	68	23	135
MCFRRRLFHHLTPYC	0	4	6	91	529	300	0	0	0	0	0	0	0	0	0	0
MCSNMWKLADRWWVC	0	3	3	9	173	297	0	0	0	0	0	0	0	0	0	0
MCSNMWRLANRWWVC	0	1	6	13	245	293	0	0	0	0	0	0	0	0	0	0
MCCFKFRDLFWAC	0	5	16	80	768	291	0	0	0	0	0	0	0	0	0	0
MCRLCFSKLFWCF	0	1	10	39	337	290	0	0	0	0	0	0	0	0	0	0
MCSNMWRLANRWWAC	0	5	10	107	723	289	0	0	0	0	0	0	0	0	0	0
MCCTRFVNLFWIC	0	1	4	39	449	283	0	0	0	0	0	0	0	0	0	0
MCFRWRLYHHLTPYC	0	3	3	51	492	282	0	0	0	0	0	0	0	0	0	0
MCRLCFSKLFC	0	1	3	42	423	274	0	0	0	0	0	0	0	2	0	0
MCCYRCWSLFWLC	0	3	0	4	287	271	0	0	0	0	0	0	0	0	0	0
MCSNMWKLADRWWAC	0	2	4	50	420	269	0	0	0	0	0	0	0	0	0	0
MCIRWPARQPLFWIC	0	1	2	8	114	267	0	0	0	0	0	0	0	0	0	0
MCFVCFRRSFLCC	0	2	0	51	526	263	0	0	0	0	0	0	0	0	0	0
MCYRHPRSNPLFWAC	0	3	5	44	347	263	0	0	0	0	0	0	0	0	0	0
MCYVCFSHSFIWC	0	2	17	157	664	260	0	0	0	0	0	0	0	0	0	0
MCIRWRLFHHLTPYC	0	2	4	25	331	259	0	0	0	0	0	0	0	0	0	0
MCFRWRLFQHLTPYC	0	3	4	31	340	258	0	0	0	0	0	0	0	0	0	0
MCSDMWKLANRWWVC	0	3	2	10	243	255	0	0	0	0	0	0	0	0	0	0
MCSNMWKLANRWWCC	0	2	0	8	260	254	0	0	0	0	0	0	0	0	0	0
MCCFKFRDLFWLC	0	5	5	16	369	251	0	0	0	0	0	0	0	0	0	0
MCYKWPIRSHLFWLC	0	1	1	22	259	247	0	0	0	0	0	0	0	0	0	0
MCFVYPRRQPLFWCC	0	2	4	9	220	245	0	0	0	0	0	0	0	0	0	0
MCFRWQLFHHLTPYC	0	2	7	36	369	240	0	0	0	0	0	0	0	0	0	0
MCVPCFSRTFLCC	0	3	3	91	436	239	0	0	0	0	0	0	0	0	0	0
MCYVCFSHSFIYC	0	5	8	45	505	236	0	0	0	0	0	0	0	0	0	0
MCYRYPHSNPLFWAC	0	2	3	32	284	234	0	0	0	0	0	0	0	0	0	0
MCSNMRKLANRWWAC	0	4	10	83	598	232	0	0	0	0	0	0	0	0	0	0
MCIYRLSDFWVMC	0	5	8	161	1035	230	0	0	0	0	0	0	0	33	18	58
MCSNMWKLASRWWVC	0	3	2	3	130	230	0	0	0	0	0	0	0	0	0	0
MCFVCFSHSFICC	0	1	4	33	271	229	0	0	0	0	0	0	0	0	0	0
MCKYHRVFYLAPLNC	0	1	6	44	446	228	0	0	0	0	0	0	0	0	0	0
MCWYCFRKSFWYC	0	8	10	66	760	226	0	0	0	0	0	0	0	0	0	0
MCIGKWYTYQYWTCC	0	3	8	40	712	222	0	0	0	0	0	0	0	0	0	0
MCFVYPRRQPSYWIC	0	2	3	82	407	221	0	0	0	0	0	0	0	0	0	0
MCCYRCWSLFWAC	0	6	4	5	307	217	0	0	0	0	0	0	0	0	0	0
MCFRWRLLHHLTPFC	0	1	1	8	198	217	0	0	0	0	0	0	0	6	0	2
MCRLCFSKLFWCY	0	4	6	21	298	217	0	0	0	0	0	0	0	0	0	0
MCSRWRLFHHLTPYC	0	1	5	52	432	216	0	0	0	0	0	0	0	0	0	0
MCIRWPAHQSLFWLC	0	5	2	48	317	214	0	0	0	0	0	0	0	0	0	0
MCLNMWKLANRWWVC	0	2	2	4	132	212	0	0	0	0	0	0	0	0	0	0
MCFRWRPFHHLTPYC	0	3	4	64	375	211	0	0	0	0	0	0	0	0	0	0
MCRLCFSNLFWCC	0	1	4	27	223	211	0	0	0	0	0	0	0	0	0	0
MCTKFPWPLPIFWAC	0	2	7	134	457	211	0	0	0	0	0	0	0	0	0	0
MCRLWFSKLFWCC	0	1	1	32	191	209	0	0	0	0	0	0	0	0	0	0
MCTRASFYGFWYYAC	0	6	7	72	607	209	0	0	0	0	0	0	0	3	0	2
MCRLCFIKLFWCC	0	0	1	20	243	208	0	0	0	0	0	0	0	0	0	0
MRRLCFSKLFWCC	0	2	4	18	257	208	0	0	0	0	0	0	0	0	0	0
MCCTRYVNLFWLC	0	2	3	23	218	207	0	0	0	0	0	0	0	0	0	0
MCRLSFSKLFWCC	0	1	2	29	256	207	0	0	0	0	0	0	0	0	0	0
MCFVCFRHTFLCC	0	2	2	38	380	206	0	0	0	0	0	0	0	0	0	0
MCCYNLYSLFWAC	0	4	4	17	240	203	0	0	0	0	0	0	0	0	0	0
MCFVYPRRKPLYWIC	0	3	4	45	346	203	0	0	0	0	0	0	0	0	0	0
MCIYRLSDFRVVC	0	1	7	70	388	203	0	0	0	0	0	0	0	10	0	6
MCLLWTRHFDRYWAC	0	6	9	77	638	203	0	0	0	0	0	0	0	0	0	0
MCSSMWKLANRWWAC	0	1	1	85	546	203	0	0	0	0	0	0	0	0	0	0
MCCFKFRDLYWIC	0	3	2	5	275	201	0	0	0	0	0	0	0	0	0	0
MCSFLLRKLYWCCNC	0	1	6	109	627	201	0	0	0	0	0	0	0	0	0	0
MCFRWRLFHHLTPLC	0	3	0	15	306	199	0	0	0	0	0	0	0	3	3	4
MCCYRCWSLFWWC	0	5	3	15	185	198	0	0	0	0	0	0	0	0	0	0
MCYVCFRHSFWCC	0	1	2	1	81	197	0	0	0	0	0	0	0	0	0	0
MCFRWWLFHHLTPYC	0	4	17	78	426	194	0	0	0	0	0	0	0	0	0	0
MCTKFPWPSPIFWAC	0	3	4	131	385	193	0	0	0	0	0	0	0	0	0	0
MCSNMWKLANRWWLC	0	2	3	1	202	192	0	0	0	0	0	0	0	0	0	0
MCSKFPWPFPIFWAC	0	0	4	91	318	191	0	0	0	0	0	0	0	0	0	0
MCYRHPHSNPLLWAC	0	2	14	93	300	189	0	0	0	0	0	0	0	0	0	0
MCFYRLSDFWVVC	0	2	3	32	301	188	0	0	0	0	0	0	0	2	0	3
MCSNIWKLANRWWAC	0	0	9	42	402	187	0	0	0	0	0	0	0	0	0	0
MCFRWRLIHHLTPYC	0	0	1	27	252	185	0	0	0	0	0	0	0	0	0	0
MCRFCFSKLFWCC	0	5	3	26	215	185	0	0	0	0	0	0	0	0	0	0
MCSSMWKLANRWWVC	0	2	2	9	191	185	0	0	0	0	0	0	0	2	0	0
MCFVYPRRQPLYWAC	0	1	0	11	187	184	0	0	0	0	0	0	0	0	0	0
MCIYRSSDFWVVC	0	4	5	53	335	184	0	0	0	0	0	0	0	5	2	8
MCYRFPSSRHLFWCC	0	2	6	26	614	183	0	0	0	0	0	0	0	0	0	0
MCFVCFRHSFLYC	0	3	14	62	539	181	0	0	0	0	0	0	0	0	0	0
MCIRWPARQSLFRLC	0	2	6	81	375	181	0	0	0	0	0	0	0	0	0	0
MCIYRLSDFWVC	0	4	2	9	356	181	0	0	0	0	0	0	0	0	0	0
MCTKFPRPFPIFWAC	0	3	4	69	458	181	0	0	0	0	0	0	0	0	0	0
MCCHRCWSLFWCC	0	1	1	17	152	180	0	0	0	0	0	0	0	0	0	0
MCFVYPHRQPLYWIC	0	2	0	36	305	180	0	0	0	0	0	0	0	0	0	0
MCIRRPARQSLFWLC	0	2	3	74	332	179	0	0	0	0	0	0	0	0	0	0
MCFRWRLFHQLTPYC	0	0	3	39	291	177	0	0	0	0	0	0	0	0	0	0
MCIVYPRRQPLYWIC	0	2	4	28	275	177	0	0	0	0	0	0	0	0	0	0
MCIYRLPDFWVVC	0	1	3	53	304	176	0	0	0	0	0	0	0	12	4	14
MCSNTWKLANRWWVC	0	1	0	6	139	176	0	0	0	0	0	0	0	0	0	0
MCYVCFSHSLICC	0	1	2	117	291	174	0	0	0	0	0	0	0	0	0	0
MCFVYPRRQPLHWIC	0	2	2	71	260	173	0	0	0	0	0	0	0	0	0	0
MCFRWPARQSLFWLC	0	0	1	32	202	172	0	0	0	0	0	0	0	0	0	0
MCRLCYSKLFWCC	0	0	3	39	244	172	0	0	0	0	0	0	0	0	0	0
MCVRWPSLNALFWLC	0	1	3	35	224	170	0	0	0	0	0	0	0	0	0	0
MCYKWPIRSHLYWFC	0	3	5	109	566	169	0	0	0	0	0	0	0	0	0	0
MCCFRFRDLFWVC	0	1	5	31	333	167	0	0	0	0	0	0	0	0	0	0
MCFRWRLFHHSTPYC	0	2	6	74	345	167	0	0	0	0	0	0	0	0	0	0
MC	682	24171	29891	47787	5042	164	2759	5339	4499	381	48	21243	13966	188557	41002	74461
MCFVYPRCQPLYWIC	0	1	3	46	231	164	0	0	0	0	0	0	0	0	0	0
MCFVCFRASFWCC	0	3	1	14	262	163	0	0	0	0	0	0	0	0	0	0
MCFVYPRRHPLYWIC	0	1	6	27	217	163	0	0	0	0	0	0	0	0	0	0
MCIRWPTRQSLFWLC	0	1	4	38	249	163	0	0	0	0	0	0	0	0	0	0
MCIGKWYTYQYWARC	0	3	5	63	640	159	0	0	0	0	0	0	0	0	0	0
MCIRWPVRQSLFWLC	0	3	1	14	154	159	0	0	0	0	0	0	0	0	0	0
MCWVCYQHSFICC	0	6	79	439	1154	159	0	0	0	0	0	0	0	0	0	0
MCCFKFRDFFWVC	0	3	4	69	456	157	0	0	0	0	0	0	0	0	0	0
MCLPCFMHLFLCC	0	5	153	729	1135	157	0	0	0	0	0	0	0	0	0	0
MCRLCFSKIFWCC	0	2	2	25	153	157	0	0	0	0	0	0	0	0	0	0
MCFVYQRRQPLYWIC	0	2	4	28	243	156	0	0	0	0	0	0	0	0	0	0
MCCFKLRDLFWAC	0	1	2	19	153	154	0	0	0	0	0	0	0	0	0	0
MCCTRFVNLFWRC	0	3	3	55	429	154	0	0	0	0	0	0	0	0	0	0
MCIYRLSDSWVVC	0	1	6	41	294	154	0	0	0	0	0	0	0	14	0	8
MCSNMWKLAKRWWAC	0	0	2	53	367	154	0	0	0	0	0	0	0	0	0	0
MCSNMWKLANRRWAC	0	2	4	65	358	154	0	0	0	0	0	0	0	0	0	0
MCYRHPHSNPLFC	0	2	2	29	261	154	0	0	0	0	0	0	0	0	0	0
MCCYRCWSLYWIC	0	1	1	3	188	153	0	0	0	0	0	0	0	0	0	0
MCSNMWKLANRWWGC	0	0	2	10	175	153	0	0	0	0	0	0	0	0	0	0
MYRLCFSKLFWCC	0	1	1	20	146	153	0	0	0	0	0	0	0	0	0	0
MCFRWRLFYHLTPYC	0	1	5	41	238	152	0	0	0	0	0	0	0	0	0	0
MCSNMWKLAKRWWVC	0	0	3	11	113	152	0	0	0	0	0	0	0	0	0	0
MCIHRLSDFWVVC	0	1	6	35	262	151	0	0	0	0	0	0	0	10	5	5
MCYRHPHGNPLFWAC	0	1	2	44	262	150	0	0	0	0	0	0	0	0	0	0
MCFRWRLFRHLTPFC	0	3	0	10	139	149	0	0	0	0	0	0	0	2	0	0
MCKYHRVFYLAPLTC	0	0	6	36	305	149	0	0	0	0	0	0	0	0	0	0
MCRLYFSKLFWCC	0	2	1	32	207	149	0	0	0	0	0	0	0	0	0	0
MCCYRCWSSFWCC	0	1	2	15	110	148	0	0	0	0	0	0	0	0	0	0
MCFVCFRHSFLWC	0	2	17	90	546	148	0	0	0	0	0	0	0	0	0	0
MCIRWPARLSLFWLC	0	2	6	28	256	148	0	0	0	0	0	0	0	0	0	0
MCRYCFRKSFWCC	0	6	7	85	514	148	0	0	0	0	0	0	0	0	0	0
MCCYRCWSLLWCC	0	1	1	14	194	147	0	0	0	0	0	0	0	3	0	0
MCFGWRLFHHLTPYC	0	2	1	30	246	147	0	0	0	0	0	0	0	0	0	0
MCFRWRLFHHLTPHC	0	1	3	81	280	147	0	0	0	0	0	0	0	0	0	0
MCSNMWKLANRWRAC	0	1	7	64	370	147	0	0	0	0	0	0	0	0	0	0
MSRLCFSKLFWCC	0	2	3	18	137	147	0	0	0	0	0	0	0	0	0	0
MCCFKFRNLFWVC	0	1	5	32	245	145	0	0	0	0	0	0	0	0	0	0
MCRLCFSKLFWVVC	0	4	4	6	441	142	0	0	0	0	0	0	0	0	0	0
MCSNIWKLANRWWVC	0	0	1	4	88	141	0	0	0	0	0	0	0	0	0	0
MCIYRLSGFWVVC	0	2	5	24	218	140	0	0	0	0	0	0	0	5	2	6
MCYRHPYSNPLFWAC	0	0	1	33	198	140	0	0	0	0	0	0	0	0	0	0
MCTRTSFYGFWCC	0	7	4	11	739	139	0	0	0	0	0	0	0	0	0	0
MCVRWPARQPLFWLC	0	0	0	11	89	139	0	0	0	0	0	0	0	0	0	0
MCWYCFRKSFWWC	0	4	8	118	696	139	0	0	0	0	0	0	0	0	0	0
MCWYCFRKSFWLC	0	0	4	25	576	137	0	0	0	0	0	0	0	0	0	0
MCCYNLFSLFWLC	0	3	3	6	323	136	0	0	0	0	0	0	0	0	0	0
MCFRFPTRCPLFWLC	0	1	2	10	116	136	0	0	0	0	0	0	0	0	0	0
MCFVHPRRQPLYWIC	0	0	3	58	276	136	0	0	0	0	0	0	0	0	0	0
MCCYRCWSLFLCC	0	0	0	6	234	134	0	0	0	0	0	0	0	0	0	0
MCFRWRLFHHLTTYC	0	1	1	24	224	134	0	0	0	0	0	0	0	0	0	0
MCFVCFSHTFICC	0	2	2	26	223	134	0	0	0	0	0	0	0	0	0	0
MCIRWPARQSPFWLC	0	1	4	55	215	134	0	0	0	0	0	0	0	0	0	0
MCFRCFSASFWCC	0	1	6	73	295	133	0	0	0	0	0	0	0	0	0	0
MCTRWPARQPLFWLC	0	2	4	11	98	133	0	0	0	0	0	0	0	0	0	0
MCFRWRLFHHFTPYC	0	0	2	21	194	132	0	0	0	0	0	0	0	0	0	0
MCVRWPNLNALFWIC	0	0	1	4	155	132	0	0	0	0	0	0	0	0	0	0
MCFVYPRRQPLYWNC	0	2	6	61	296	130	0	0	0	0	0	0	0	0	0	0
MCYRHPHSSPLFWAC	0	1	4	41	247	130	0	0	0	0	0	0	0	0	0	0
MCFRWRLFHHLTPYS	0	1	0	22	216	129	0	0	0	0	0	0	0	0	0	0
MCFVYPRRQPLCWIC	0	0	1	43	189	129	0	0	0	0	0	0	0	0	0	0
MCFVYPRRQPLYWIS	0	2	0	24	180	129	0	0	0	0	0	0	0	0	0	0
MCRLCFSKLIWCC	0	1	0	17	165	129	0	0	0	0	0	0	0	0	0	0
MCCYRCWSLFWVC	0	2	1	2	138	128	0	0	0	0	0	0	0	0	0	0
MCMRTSFYGFWYYAC	0	1	3	36	286	128	0	0	0	0	0	0	0	2	2	2
MCVRWPKLNALFWLC	0	3	0	14	124	128	0	0	0	0	0	0	0	0	0	0
MCCYRCWSLFWRC	0	2	2	28	187	127	0	0	0	0	0	0	0	2	0	0
MCCYNLLSLFWAC	0	2	3	56	312	126	0	0	0	0	0	0	0	0	0	0
MCHVCFSHSFICC	0	4	1	62	258	126	0	0	0	0	0	0	0	0	0	0
MCSNMRKLANRWWVC	0	5	2	13	147	126	0	0	0	0	0	0	0	0	0	0
MCCTRFVDLFWLC	0	2	2	50	289	125	0	0	0	0	0	0	0	0	0	0
MCIRWPARQTLFWLC	0	3	1	23	201	125	0	0	0	0	0	0	0	0	0	0
MCVRWPNSNALFWLC	0	0	5	41	282	125	0	0	0	0	0	0	0	0	0	0
MCWYCFQKSFWCC	0	3	0	32	307	125	0	0	0	0	0	0	0	0	0	0
MCFVYPRRQPFYWIC	0	1	0	15	152	124	0	0	0	0	0	0	0	0	0	0
MCIRWPARQSLSWLC	0	3	3	73	200	124	0	0	0	0	0	0	0	0	0	0
MCYVCFEHRFICC	0	1	1	8	125	124	0	0	0	0	0	0	0	0	0	0
MCLLWTRHFDRYWLC	0	4	1	15	432	123	0	0	0	0	0	0	0	0	0	0
MCFRWRLSHHLTPFC	0	0	2	11	162	122	0	0	0	0	0	0	0	3	0	0
MCFVYPRRQPLNWIC	0	2	1	28	175	122	0	0	0	0	0	0	0	0	0	0
MCYRFPSSRHLFWVC	0	2	3	31	221	122	0	0	0	0	0	0	0	0	0	0
MCFVYPCRQPLYWIC	0	0	4	34	175	121	0	0	0	0	0	0	0	0	0	0
MCLVCFRHSFLCC	0	2	12	95	524	121	0	0	0	0	0	0	0	0	0	0
MCSDMWKLANRWWAC	0	2	5	61	346	121	0	0	0	0	0	0	0	0	0	0
MCFVYPRRQLLYWIC	0	0	3	34	206	120	0	0	0	0	0	0	0	0	0	0
MCSNMWKLANRWWDC	0	2	4	39	276	120	0	0	0	0	0	0	0	0	0	0
MCSNMWKLANRWRVC	0	2	1	8	110	119	0	0	0	0	0	0	0	0	0	0
MCYRHPHSNPLFWIC	0	0	0	2	106	119	0	0	0	0	0	0	0	0	0	0
MCTKFPWPFPILWAC	0	3	6	91	284	118	0	0	0	0	0	0	0	0	0	0
MCYKWPIQSHLYWLC	0	0	2	30	268	118	0	0	0	0	0	0	0	0	0	0
MCHRHPHSNPLFWAC	0	1	2	57	260	117	0	0	0	0	0	0	0	0	0	0
MCFRWRLFHRLTPYC	0	1	6	37	219	116	0	0	0	0	0	0	0	0	0	0
MCIYRLSDFWVGC	0	0	3	21	211	116	0	0	0	0	0	0	0	7	2	4
MCFRHPHSNPLFWAC	0	1	4	16	131	115	0	0	0	0	0	0	0	0	0	0
MCSNMWKLANRRWVC	0	0	0	6	117	115	0	0	0	0	0	0	0	0	0	0
MCVRWPNLNALFWVC	0	1	0	2	112	115	0	0	0	0	0	0	0	0	0	0
MCCYNLFSLLWAC	0	2	3	58	303	114	0	0	0	0	0	0	0	0	0	0
MCFDYPRRQPLYWIC	0	0	1	17	139	114	0	0	0	0	0	0	0	0	0	0
MCTRTSFYGLWYYAC	0	1	5	65	363	114	0	0	0	0	0	0	0	6	0	0
MCIRWPACQSLFWLC	0	2	2	37	252	113	0	0	0	0	0	0	0	0	0	0
MCIYRLSDFWVEC	0	2	3	30	217	113	0	0	0	0	0	0	0	13	2	8
MCFRWRLFHHLTPNC	0	1	3	54	230	112	0	0	0	0	0	0	0	0	0	0
MCIKFPWPFPIFWAC	0	0	1	28	156	112	0	0	0	0	0	0	0	0	0	0
MCSQSWVLHELWRVC	0	0	6	36	247	112	0	0	0	0	0	0	0	0	0	0
MCTRTSFYGYWYYAC	0	0	2	16	226	112	0	0	0	0	0	0	0	0	2	7
MCWPCFARSFLCC	0	7	111	857	1027	112	0	0	0	0	0	0	0	0	0	0
MCFRWRLFHHLTPYY	0	1	0	20	134	111	0	0	0	0	0	0	0	0	0	0
MCFVYLRRQPLYWIC	0	2	1	30	198	110	0	0	0	0	0	0	0	0	0	0
MCKRTSFYGFWYYAC	0	1	4	20	218	110	0	0	0	0	0	0	0	5	0	2
MCVRWPNLNALFWAC	0	3	1	7	261	110	0	0	0	0	0	0	0	0	0	0
MCNYRLSDFWVVC	0	1	1	17	164	109	0	0	0	0	0	0	0	3	0	0
MCTKFPWPFPIFWVVC	0	5	3	4	439	109	0	0	0	0	0	0	0	0	0	0
MCCYRCWSLFRCC	0	1	0	13	121	108	0	0	0	0	0	0	0	2	0	0
MCCYRCWSLYWCC	0	0	1	7	85	108	0	0	0	0	0	0	0	0	0	0
MCIRWPARQSQFWLC	0	2	4	37	193	108	0	0	0	0	0	0	0	0	0	0
MCVRWPNLNALFWPC	0	3	4	83	264	108	0	0	0	0	0	0	0	0	0	0
MCIYRLSDFWVVS	0	1	1	20	175	107	0	0	0	0	0	0	0	0	0	0
MCLSWTRHFDRYWVC	0	0	3	46	335	107	0	0	0	0	0	0	0	0	0	0
MCYVCFSHPFICC	0	2	2	64	194	107	0	0	0	0	0	0	0	0	0	0
MCRLCFTKLFWCC	0	0	3	17	137	106	0	0	0	0	0	0	0	0	0	0
MCSNMWKLASRWWAC	0	0	0	43	223	106	0	0	0	0	0	0	0	0	0	0
MCFVYPRRQPLYWIY	0	0	3	20	159	105	0	0	0	0	0	0	0	0	0	0
MCIYRLSDYWVVC	0	0	2	7	172	105	0	0	0	0	0	0	0	2	0	2
MCKYHRVFYLAPLQC	0	0	0	2	109	105	0	0	0	0	0	0	0	0	0	0
MCRYRCWSLFWCC	0	0	1	11	113	105	0	0	0	0	0	0	0	0	0	0
MCYACFSHSFICC	0	3	2	73	201	105	0	0	0	0	0	0	0	0	0	0
MCYKWPIRSHLFWVC	0	1	0	3	98	105	0	0	0	0	0	0	0	0	0	0
MCYKWPVRSHLYWLC	0	1	2	34	321	105	0	0	0	0	0	0	0	0	0	0
MCYVCSSHSFICC	0	1	2	83	212	105	0	0	0	0	0	0	0	0	0	0
MCCHRYRALFWIC	0	5	110	503	959	104	0	0	0	0	0	0	0	0	0	0
MCRLFFSKLFWCC	0	4	0	16	114	104	0	0	0	0	0	0	0	0	0	0
MCYKCFTGLFICC	0	0	3	4	182	104	0	0	0	0	0	0	0	0	0	0
MCYKWPIRSHLYWSC	0	3	7	98	406	104	0	0	0	0	0	0	0	0	0	0
MCFRWRLFHHMTPYC	0	0	1	17	177	103	0	0	0	0	0	0	0	0	0	0
MCIRWPARHSLFWLC	0	0	0	19	150	103	0	0	0	0	0	0	0	0	0	0
MCIYRLSDFWVIC	0	1	1	9	132	103	0	0	0	0	0	0	0	0	0	4
MCRVCFSKLFWCC	0	1	2	15	126	103	0	0	0	0	0	0	0	0	0	0
MCYVCFSHSFIC	0	1	0	30	154	103	0	0	0	0	0	0	0	0	0	0
MCFRWRLFHHLAPFC	0	1	2	4	81	102	0	0	0	0	0	0	0	0	0	0
MCIYSLSDFWVVC	0	0	2	10	125	102	0	0	0	0	0	0	0	0	0	2
MCLLWTRHFDRYWCC	0	1	1	9	279	102	0	0	0	0	0	0	0	0	0	0
MCPRTSFYGFWYYAC	0	0	2	24	207	102	0	0	0	0	0	0	0	0	0	0
MCCYRCWSLFWIC	0	2	5	2	77	101	0	0	0	0	0	0	0	0	0	0
MCFRCFARLFWCC	0	1	4	61	212	100	0	0	0	0	0	0	0	0	0	0
MCFVFPRRQPLYWIC	0	0	3	12	154	100	0	0	0	0	0	0	0	0	0	0
MCRLCFSKFFWCC	0	3	1	24	154	100	0	0	0	0	0	0	0	0	0	0
MCRLCFSKLFWCR	0	0	0	19	140	100	0	0	0	0	0	0	0	0	0	0
MCSNTWKLANRWWAC	0	2	9	58	259	100	0	0	0	0	0	0	0	0	0	0
MCFRWRQFHHLTPYC	0	0	5	25	169	99	0	0	0	0	0	0	0	0	0	0
MCIRWPARQSMFWLC	0	2	1	16	127	99	0	0	0	0	0	0	0	0	0	0
MCIYRLSDFLVVC	0	2	0	12	150	99	0	0	0	0	0	0	0	3	0	2
MCTKFPWPFPTFWAC	0	1	3	69	258	99	0	0	0	0	0	0	0	0	0	0
MCWYCFRRSFWCC	0	0	2	62	357	99	0	0	0	0	0	0	0	0	0	0
MCIYRLSDFWIVC	0	2	2	16	179	98	0	0	0	0	0	0	0	10	0	5
MCSNVWKLANRWWVC	0	1	2	5	85	98	0	0	0	0	0	0	0	0	0	0
MCVRWPARQSLFWIC	0	1	4	18	88	98	0	0	0	0	0	0	0	0	0	0
MCYKWPIRSHFYWLC	0	1	2	38	248	98	0	0	0	0	0	0	0	0	0	0
MCYRHPHSNPLYWLC	0	2	3	4	198	98	0	0	0	0	0	0	0	0	0	0
MCCVRYLARFWCC	0	2	0	14	322	97	0	0	0	0	0	0	0	0	0	0
MCCYRCWSLFC	0	1	0	17	201	97	0	0	0	0	0	0	0	0	0	0
MCTRSSFYGFWYYAC	0	1	2	20	143	97	0	0	0	0	0	0	0	2	0	0
MCVRWPNLNALLWLC	0	1	5	50	236	97	0	0	0	0	0	0	0	0	0	0
MCYRHPHRNPLFWAC	0	0	1	26	161	97	0	0	0	0	0	0	0	0	0	0
MCCYNLFSLFWIC	0	2	3	7	169	96	0	0	0	0	0	0	0	0	0	0
MCGLCFSKLFWCC	0	2	1	18	117	96	0	0	0	0	0	0	0	0	0	0
MCSKMWKLANRWWAC	0	0	3	21	220	96	0	0	0	0	0	0	0	0	0	0
MCTKFPWPFPIFWIC	0	1	1	3	83	96	0	0	0	0	0	0	0	0	0	0
MCTNMWKLANRWWAC	0	1	0	22	219	96	0	0	0	0	0	0	0	0	0	0
MCCTRFVNLFWPC	0	3	9	83	307	95	0	0	0	0	0	0	0	0	0	0
MCIRWPARQSLIWLC	0	2	2	21	134	95	0	0	0	0	0	0	0	0	0	0
MCLGKWYTYQYWTRC	0	1	1	9	134	95	0	0	0	0	0	0	0	0	0	0
MCSNMWKPANRWWAC	0	2	8	66	284	95	0	0	0	0	0	0	0	0	0	0
MCYVRFSHSFICC	0	0	4	68	181	95	0	0	0	0	0	0	0	0	0	0
MCCTRFVNLFWAC	0	4	0	5	172	94	0	0	0	0	0	0	0	0	0	0
MCFVYPSRQPLYWIC	0	0	0	14	115	94	0	0	0	0	0	0	0	0	0	0
MCSNVWKLANRWWAC	0	1	4	31	256	94	0	0	0	0	0	0	0	0	0	0
MCYVCFSHSFTCC	0	1	6	72	193	94	0	0	0	0	0	0	0	0	0	0
MCCYRCWSLSWCC	0	0	0	9	102	93	0	0	0	0	0	0	0	0	0	0
MCFGKWYTYQYWTRC	0	3	0	19	234	93	0	0	0	0	0	0	0	0	0	0
MCLPCFRHLFLCC	0	1	1	22	181	93	0	0	0	0	0	0	0	0	0	0
MCRLCFSMLFWCC	0	0	2	17	132	93	0	0	0	0	0	0	0	0	0	0
MCTRTSFYGFWYYDC	0	1	8	36	407	93	0	0	0	0	0	0	0	9	2	5
MCYRHPHSKPLFWAC	0	0	6	31	155	93	0	0	0	0	0	0	0	0	0	0
MCYTWYKLRQRYWAC	0	7	171	455	1233	93	0	0	0	0	0	0	0	0	0	0
MCFVYPRRQSLYWIC	0	1	2	25	144	92	0	0	0	0	0	0	0	0	0	0
MCLLCFSKLFWCC	0	0	2	31	111	92	0	0	0	0	0	0	0	0	0	0
MCYVCFPHSFICC	0	3	4	72	170	92	0	0	0	0	0	0	0	0	0	0
MCYVCLSHSFICC	0	1	5	96	236	92	0	0	0	0	0	0	0	0	0	0
MCFVCPRRQPLYWIC	0	3	1	32	184	91	0	0	0	0	0	0	0	0	0	0
MCIYRLSDFWDVC	0	1	2	23	173	91	0	0	0	0	0	0	0	0	0	0
MCVRWPNLNAPFWLC	0	0	4	73	179	91	0	0	0	0	0	0	0	0	0	0
MCYKWPIRPHLYWLC	0	4	4	60	272	91	0	0	0	0	0	0	0	0	0	0
MFRLCFSKLFWCC	0	0	0	14	103	91	0	0	0	0	0	0	0	0	0	0
MCFPCFCFTFLCC	0	2	88	696	812	90	0	0	0	0	0	0	0	0	0	0
MCIGKWYTYQYWTLC	0	2	0	16	208	90	0	0	0	0	0	0	0	0	0	0
MCIRWPARQPLFWAC	0	2	0	2	44	90	0	0	0	0	0	0	0	0	0	0
MCIYRLSDIWVVC	0	0	2	16	136	90	0	0	0	0	0	0	0	0	0	4
MCIRWPARQPLYWIC	0	0	1	0	35	89	0	0	0	0	0	0	0	0	0	0
MCIYRLSEFWVVC	0	0	1	14	153	89	0	0	0	0	0	0	0	2	0	0
MCMKCFRYRYWCC	0	5	93	604	1177	89	0	0	0	0	0	0	0	0	0	0
MCCYRCWSLYWLC	0	1	3	2	216	88	0	0	0	0	0	0	0	0	0	0
MCFRWRLFHHLTHYC	0	0	2	14	115	88	0	0	0	0	0	0	0	0	0	0
MCSIMWKLANRWWAC	0	0	0	16	137	88	0	0	0	0	0	0	0	0	0	0
MCSYMWKLANRWWAC	0	1	1	15	201	88	0	0	0	0	0	0	0	0	0	0
MCTKFPWPFPMFWAC	0	3	0	7	106	88	0	0	0	0	0	0	0	0	0	0
MCYVCFSHSFISC	0	3	11	161	244	88	0	0	0	0	0	0	0	0	0	0
MCCFKFRDLFWVVC	0	4	0	4	265	87	0	0	0	0	0	0	0	0	0	0
MCFRWRLFHHLMPYC	0	0	2	17	138	87	0	0	0	0	0	0	0	0	0	0
MCFVYPRRQPLYCIC	0	0	1	19	127	87	0	0	0	0	0	0	0	0	0	0
MCIRWPARQSLFWHC	0	1	3	44	182	87	0	0	0	0	0	0	0	0	0	0
MCIYCLSDFWVVC	0	0	0	22	146	87	0	0	0	0	0	0	0	0	2	3
MCIYRLSNFWVVC	0	0	3	19	114	87	0	0	0	0	0	0	0	0	0	4
MCIRWPARQPLFWVC	0	2	0	2	31	86	0	0	0	0	0	0	0	0	0	0
MCIYRLLDFWVVC	0	2	2	21	126	86	0	0	0	0	0	0	0	8	0	0
MCWYCFRKSFLCC	0	2	2	27	410	86	0	0	0	0	0	0	0	0	0	0
MCCYRCRSLFWCC	0	1	2	13	135	85	0	0	0	0	0	0	0	2	0	0
MCNRWPARQSLFWLC	0	2	1	23	162	85	0	0	0	0	0	0	0	0	0	0
MCTRMSFYGFWYYAC	0	1	1	35	217	85	0	0	0	0	0	0	0	2	0	0
MCYKWPIRSQLYWLC	0	0	4	25	238	85	0	0	0	0	0	0	0	0	0	0
MCFRCFLASFWYC	0	0	2	26	244	84	0	0	0	0	0	0	0	0	0	0
MCFRWRLVHHLTPYC	0	0	0	21	151	84	0	0	0	0	0	0	0	0	0	0
MCIYRLSDFWVVY	0	0	2	18	148	84	0	0	0	0	0	0	0	0	0	0
MCIYRLTDFWVVC	0	0	0	11	145	84	0	0	0	0	0	0	0	5	0	0
MCLLWTKHFDRYWVC	0	2	1	17	153	84	0	0	0	0	0	0	0	0	0	0
MCSNMWKLANRWC	0	0	2	15	122	84	0	0	0	0	0	0	0	0	0	0
MCYVCFSHSFIRC	0	2	4	81	223	84	0	0	0	0	0	0	0	0	0	0
MCIRWPARQPLFWRC	0	0	1	5	62	83	0	0	0	0	0	0	0	0	0	0
MCSNMWKLANHWWVC	0	0	1	3	62	83	0	0	0	0	0	0	0	0	0	0
MCYKWPIRLHLYWLC	0	2	0	36	230	83	0	0	0	0	0	0	0	0	0	0
MCCYRCWSLFWSC	0	2	1	29	125	82	0	0	0	0	0	0	0	0	0	0
MCTRTSFYGFLYYAC	0	0	4	20	224	82	0	0	0	0	0	0	0	2	0	0
MCVRCFDRLFWCC	0	2	4	23	159	82	0	0	0	0	0	0	0	0	0	0
MCYVCFLHSFICC	0	1	2	49	162	82	0	0	0	0	0	0	0	0	0	0
MRIYRLSDFWVVC	0	0	2	8	114	82	0	0	0	0	0	0	0	2	0	0
MCSNMWKHANRWWAC	0	1	1	26	198	80	0	0	0	0	0	0	0	0	0	0
MCSNMWKLANCWWVC	0	2	2	2	58	80	0	0	0	0	0	0	0	0	0	0
MCTRTSFYDFWYYAC	0	0	0	28	168	80	0	0	0	0	0	0	0	3	0	0
MCYRHPHSNPLYWIC	0	1	1	2	132	80	0	0	0	0	0	0	0	0	0	0
MCYVCFSHSSICC	0	1	2	67	183	80	0	0	0	0	0	0	0	0	0	0
MCFACFRHSFLCC	0	0	4	70	253	79	0	0	0	0	0	0	0	0	0	0
MCFAYPRRQPLYWLC	0	0	0	2	37	79	0	0	0	0	0	0	0	0	0	0
MCSVCFRHSFLCC	0	0	3	70	250	79	0	0	0	0	0	0	0	0	0	0
MCYKWPIRSHLYRLC	0	0	2	45	232	79	0	0	0	0	0	0	0	0	0	0
MCFRFPTRCPLFLIC	0	0	4	43	219	78	0	0	0	0	0	0	0	0	0	0
MCFVYPRRQPVYWIC	0	0	1	14	116	78	0	0	0	0	0	0	0	0	0	0
MCIGEWYTYQYWTRC	0	1	0	26	216	78	0	0	0	0	0	0	0	0	0	0
MCSNMWELANRWWAC	0	1	2	48	201	78	0	0	0	0	0	0	0	0	0	0
MCCYNLFSLFC	0	1	2	16	154	77	0	0	0	0	0	0	0	0	0	0
MCVRCFNQLFWCC	0	2	2	22	165	77	0	0	0	0	0	0	0	0	0	0
MCCYRCWSLFWC	0	0	2	11	96	76	0	0	0	0	0	0	0	2	0	0
MCFVCFRHLFLCC	0	0	1	26	227	76	0	0	0	0	0	0	0	0	0	0
MCLVCFSNLFWCC	0	2	132	511	798	76	0	0	0	0	0	0	0	0	0	0
MCVPCFSHTFLYC	0	0	6	48	204	76	0	0	0	0	0	0	0	0	0	0
MCCYKLFSLFWAC	0	1	0	12	120	75	0	0	0	0	0	0	0	0	0	0
MCCYNLSSLFWAC	0	0	8	43	185	75	0	0	0	0	0	0	0	0	0	0
MCIRWPARQFLFWLC	0	1	2	30	105	75	0	0	0	0	0	0	0	0	0	0
MCTRTSLYGFWYYAC	0	1	8	67	254	75	0	0	0	0	0	0	0	2	0	0
MCIYHLSDFWVVC	0	3	1	12	145	74	0	0	0	0	0	0	0	3	0	2
MCRYNLFSLFWAC	0	1	4	43	133	74	0	0	0	0	0	0	0	0	0	0
MCSNMWKLANSWWVC	0	0	0	3	44	74	0	0	0	0	0	0	0	0	0	0
MCTKLPWPFPIFWAC	0	0	5	72	226	74	0	0	0	0	0	0	0	0	0	0
MCICRLSDFWVVC	0	2	2	17	117	73	0	0	0	0	0	0	0	6	0	2
MCIRWPARQSLFWLS	0	1	0	19	153	73	0	0	0	0	0	0	0	0	0	0
MCLLWTRHFDRYWGC	0	3	6	29	221	73	0	0	0	0	0	0	0	0	0	0
MCLLWTRHLDRYWVC	0	0	5	35	274	73	0	0	0	0	0	0	0	0	0	0
MCSNKWKLANRWWVC	0	1	0	3	75	73	0	0	0	0	0	0	0	0	0	0
MCYRHPHSDPLFWAC	0	0	5	37	157	73	0	0	0	0	0	0	0	0	0	0
MCYRHPHSNPLFWVVC	0	0	0	2	193	73	0	0	0	0	0	0	0	0	0	0
MCYRWRLFHHLTPFC	0	1	1	3	76	73	0	0	0	0	0	0	0	0	0	0
MCHKWPIRSHLYWLC	0	1	4	38	223	72	0	0	0	0	0	0	0	0	0	0
MCIRWPARQPLYWLC	0	2	0	2	38	72	0	0	0	0	0	0	0	0	0	0
MCRLCFCFSFWCC	0	6	130	683	998	72	0	0	0	0	0	0	0	0	0	0
MCYRHPHSNPPFWAC	0	0	4	53	112	72	0	0	0	0	0	0	0	0	0	0
MCFKWPIRSHLYWLC	0	0	1	16	156	71	0	0	0	0	0	0	0	0	0	0
MCFVYTRRQPLYWIC	0	0	2	14	101	71	0	0	0	0	0	0	0	0	0	0
MCIFRLSDFWVVC	0	1	0	12	113	71	0	0	0	0	0	0	0	0	0	0
MCIRWPARQSLFWFC	0	0	4	56	194	71	0	0	0	0	0	0	0	0	0	0
MCSNMWKLANSWWAC	0	1	0	23	178	71	0	0	0	0	0	0	0	0	0	0
MCYKRPIRSHLYWLC	0	1	4	56	288	71	0	0	0	0	0	0	0	0	0	0
MCYKWPFRSHLYWLC	0	2	2	29	222	71	0	0	0	0	0	0	0	0	0	0
MCYRHPHSNPLFRAC	0	0	4	49	160	71	0	0	0	0	0	0	0	0	0	0
MCCYRCYRLFFCC	0	2	81	405	595	70	0	0	0	0	0	0	0	0	0	0
MCFRWRLFHYLTPYC	0	1	0	17	127	70	0	0	0	0	0	0	0	0	0	0
MCIRWPARKSLFWLC	0	1	0	17	80	70	0	0	0	0	0	0	0	0	0	0
MCTRTCFYGFWYYAC	0	0	0	13	132	70	0	0	0	0	0	0	0	2	0	2
MCWYCLRKSFWCC	0	0	2	68	279	70	0	0	0	0	0	0	0	0	0	0
MRFVYPRRQPLYWIC	0	0	0	13	138	70	0	0	0	0	0	0	0	0	0	0
MCIGKWYTYQYWTYC	0	1	0	5	123	69	0	0	0	0	0	0	0	0	0	0
MCIRWLARQSLFWLC	0	0	1	25	120	69	0	0	0	0	0	0	0	0	0	0
MCLYRLSDFWVVC	0	0	2	6	113	69	0	0	0	0	0	0	0	68	10	74
MCSNMWKHANRWWVC	0	1	1	2	47	69	0	0	0	0	0	0	0	0	0	0
MCTKFPWPFPIFC	0	3	1	19	110	69	0	0	0	0	0	0	0	0	0	0
MCTNMWKLANRWWVC	0	1	0	1	85	69	0	0	0	0	0	0	0	0	0	0
MCVPCFSHTFLWC	0	0	5	125	232	69	0	0	0	0	0	0	0	0	0	0
MRFRWRLFHHLTPYC	0	0	2	8	129	69	0	0	0	0	0	0	0	0	0	0
MCFVYPRRQPLYWFC	0	1	1	16	117	68	0	0	0	0	0	0	0	0	0	0
MCINRLSDFWVVC	0	1	1	19	129	68	0	0	0	0	0	0	0	0	0	4
MCIRWSARQSLFWLC	0	0	3	17	108	68	0	0	0	0	0	0	0	0	0	0
MCLLWTRHFNRYWVC	0	0	1	19	169	68	0	0	0	0	0	0	0	0	0	0
MCTKYPWPFPIFWAC	0	1	3	31	168	68	0	0	0	0	0	0	0	0	0	0
MCWSLYRLFWCC	0	3	2	11	232	68	0	0	0	0	0	0	0	0	0	0
MCWYCFRKSLWCC	0	1	4	78	300	68	0	0	0	0	0	0	0	0	0	0
MCYECFSHSFICC	0	1	0	26	124	68	0	0	0	0	0	0	0	0	0	0
MCYKWPIRTHLYWLC	0	1	3	27	206	68	0	0	0	0	0	0	0	0	0	0
MCCFKCFNLFFCC	0	1	54	374	651	67	0	0	0	0	0	0	0	0	0	0
MCCYRCWTLFWCC	0	0	1	4	54	67	0	0	0	0	0	0	0	0	0	0
MCSQSWVLYKLWRVC	0	0	0	10	105	67	0	0	0	0	0	0	0	0	0	0
MCVRWPNLNPLFWLC	0	3	1	7	71	67	0	0	0	0	0	0	0	0	0	0
MCWYCFRKSFWAC	0	0	3	17	362	67	0	0	0	0	0	0	0	0	0	0
MCYKWPIRSHLFWCC	0	0	0	2	128	67	0	0	0	0	0	0	0	0	0	0
MCCTRCFSHFWCC	0	7	132	639	714	66	0	0	0	0	0	0	0	0	0	0
MCCYHCWSLFWCC	0	1	0	1	73	66	0	0	0	0	0	0	0	0	0	0
MCCYRCWPLFWCC	0	0	0	13	99	66	0	0	0	0	0	0	0	0	0	0
MCCYRRWSLFWCC	0	0	1	10	72	66	0	0	0	0	0	0	0	0	0	0
MCTKFPWPFPIFRAC	0	0	4	42	176	66	0	0	0	0	0	0	0	0	0	0
MCTRFPWPFPIFWAC	0	2	0	45	180	66	0	0	0	0	0	0	0	0	0	0
MCCVCFSHSFICC	0	1	3	35	147	65	0	0	0	0	0	0	0	0	0	0
MCFRWRMFHHLTPYC	0	0	1	11	79	65	0	0	0	0	0	0	0	0	0	0
MCSYRCWSLFWCC	0	1	0	7	56	65	0	0	0	0	0	0	0	0	0	0
MCYRWPIRSHLYWLC	0	0	4	36	268	65	0	0	0	0	0	0	0	0	0	0
MCFVYPRRQTLYWIC	0	0	2	18	85	64	0	0	0	0	0	0	0	0	0	0
MCSNMWKPANRWWVC	0	0	1	2	70	64	0	0	0	0	0	0	0	0	0	0
MCPIPVKYLSLYWLC	0	1	1	32	159	63	0	0	0	0	0	0	0	0	0	0
MCYVCFSHSYICC	0	1	0	31	98	63	0	0	0	0	0	0	0	0	0	0
MCFKWRLFHHLTPYC	0	1	2	15	94	62	0	0	0	0	0	0	0	0	0	0
MCFLYPRRQPLYWIC	0	1	1	6	103	62	0	0	0	0	0	0	0	0	0	0
MCFRWRLFHHLTSYC	0	0	4	14	85	62	0	0	0	0	0	0	0	0	0	0
MCYRHPHSNPQFWAC	0	0	0	23	71	62	0	0	0	0	0	0	0	0	0	0
MCYVCFSKLFWCC	0	2	0	0	31	62	0	0	0	0	0	0	0	0	0	0
MYFRWRLFHHLTPYC	0	0	0	4	49	62	0	0	0	0	0	0	0	0	0	0
MCIRWPTRQPLFWLC	0	1	0	1	29	61	0	0	0	0	0	0	0	0	0	0
MCRLCFSKLFWGC	0	1	1	16	113	61	0	0	0	0	0	0	0	0	0	0
MCTRTGFYGFWYYAC	0	1	6	43	203	61	0	0	0	0	0	0	0	3	0	0
MCVGKWYTYQYWTRC	0	0	3	32	302	61	0	0	0	0	0	0	0	0	0	0
MCWYCFRKSFWRC	0	0	3	76	276	61	0	0	0	0	0	0	0	0	0	0
MCCSRCFKSFLCC	0	5	73	643	751	60	0	0	0	0	0	0	0	0	0	0
MCFRWRLFHHLPPYC	0	0	1	18	96	60	0	0	0	0	0	0	0	0	0	0
MCSHMWKLANRWWAC	0	0	1	20	117	60	0	0	0	0	0	0	0	0	0	0
MCSNKWKLANRWWAC	0	0	2	17	197	60	0	0	0	0	0	0	0	0	0	0
MCSNMWKLANRSWAC	0	0	1	7	91	60	0	0	0	0	0	0	0	0	0	0
MCYVCFTHSFICC	0	1	0	22	114	60	0	0	0	0	0	0	0	0	0	0
MCCTRLVNLFWLC	0	0	1	31	152	59	0	0	0	0	0	0	0	0	0	0
MCFRCFLASFWWC	0	2	5	69	242	59	0	0	0	0	0	0	0	0	0	0
MCFVYPRRQPLYWIF	0	1	0	6	65	59	0	0	0	0	0	0	0	0	0	0
MCTRTSYYGFWYYAC	0	0	3	30	184	59	0	0	0	0	0	0	0	0	0	0
MCYKWPIRSLLYWLC	0	0	4	26	163	59	0	0	0	0	0	0	0	0	0	0
MCCIKFRDLFWVC	0	0	5	23	184	58	0	0	0	0	0	0	0	0	0	0
MCCTRFVNLLWLC	0	1	3	53	187	58	0	0	0	0	0	0	0	0	0	0
MCPLWTRHFDRYWIC	0	0	1	0	46	58	0	0	0	0	0	0	0	0	0	0
MCSNMWKLVNRWWVC	0	0	1	5	39	58	0	0	0	0	0	0	0	0	0	0
MCCLKFRDLFWVC	0	0	2	33	137	57	0	0	0	0	0	0	0	0	0	0
MCFAYPRRQPLYWVC	0	0	0	4	52	57	0	0	0	0	0	0	0	0	0	0
MCTRTSFYGSWYYAC	0	1	4	45	208	57	0	0	0	0	0	0	0	7	0	0
MCWSLYRLFWVC	0	2	1	35	196	57	0	0	0	0	0	0	0	0	0	0
MCCHNLFSLFWAC	0	1	2	32	165	56	0	0	0	0	0	0	0	0	0	0
MCCYKFRDLFWVC	0	1	2	15	86	56	0	0	0	0	0	0	0	0	0	0
MCCYRCWSFFWCC	0	1	0	0	58	56	0	0	0	0	0	0	0	0	0	0
MCIHWPARQSLFWLC	0	1	3	29	127	56	0	0	0	0	0	0	0	0	0	0
MCIRWPARQPLLWLC	0	1	0	4	41	56	0	0	0	0	0	0	0	0	0	0
MCRLCFSKLFSCC	0	1	0	12	80	56	0	0	0	0	0	0	0	0	0	0
MCRLCISKLFWCC	0	0	1	24	105	56	0	0	0	0	0	0	0	0	0	0
MCMRWPNLNALFWLC	0	2	0	26	118	55	0	0	0	0	0	0	0	0	0	0
MCCYNLFSLFWSC	0	0	1	17	89	54	0	0	0	0	0	0	0	0	0	0
MCSKMWKLANRWWVC	0	0	0	1	53	54	0	0	0	0	0	0	0	0	0	0
MCTKFPWSFPIFWAC	0	1	0	21	91	54	0	0	0	0	0	0	0	0	0	0
MCYVCFEHQFLCC	0	0	0	9	112	54	0	0	0	0	0	0	0	0	0	0
MSFVYPRRQPLYWIC	0	1	0	15	89	54	0	0	0	0	0	0	0	0	0	0
MCCYNLFSLSWAC	0	0	4	24	134	53	0	0	0	0	0	0	0	0	0	0
MCFRCRLFHHLTPYC	0	1	0	12	78	53	0	0	0	0	0	0	0	0	0	0
MCFVYSRRQPLYWIC	0	1	1	19	103	53	0	0	0	0	0	0	0	0	0	0
MCSNMWKLTNRWWAC	0	0	2	14	103	53	0	0	0	0	0	0	0	0	0	0
MCTRTSSYGFWYYAC	0	1	5	49	183	53	0	0	0	0	0	0	0	4	0	3
MCVRWPNLNALFRLC	0	0	4	45	141	53	0	0	0	0	0	0	0	0	0	0
MCWYCFRKRFWCC	0	2	2	28	188	53	0	0	0	0	0	0	0	0	0	0
MCYVCFSHSFICS	0	0	1	15	81	53	0	0	0	0	0	0	0	0	0	0
MCCTRFVNLFWVC	0	1	0	5	77	52	0	0	0	0	0	0	0	0	0	0
MCFRWRLFHNLTPYC	0	0	3	6	80	52	0	0	0	0	0	0	0	0	0	0
MCFRWRLFLHLTPYC	0	0	0	13	95	52	0	0	0	0	0	0	0	0	0	0
MCFVCFRHSFLRC	0	0	5	63	253	52	0	0	0	0	0	0	0	0	0	0
MCFVYPRRLPLYWIC	0	1	0	11	97	52	0	0	0	0	0	0	0	0	0	0
MCIRWPASQSLFWLC	0	0	1	12	83	52	0	0	0	0	0	0	0	0	0	0
MCRLCFSKLFYCC	0	0	1	4	235	52	0	0	0	0	0	0	0	0	0	0
MCSNMWELANRWWVC	0	1	1	8	57	52	0	0	0	0	0	0	0	2	0	0
MCTRTSFYSFWYYAC	0	1	1	24	137	52	0	0	0	0	0	0	0	2	0	0
MCVRWPNLKALFWLC	0	0	4	20	120	52	0	0	0	0	0	0	0	0	0	0
MCYKWPIRSHLYWAC	0	0	1	4	129	52	0	0	0	0	0	0	0	0	0	0
MCYKWPIRSHLYWMC	0	1	3	25	191	52	0	0	0	0	0	0	0	0	0	0
MCCSKFRDLFWVC	0	0	3	25	133	51	0	0	0	0	0	0	0	0	0	0
MCCTRFVNPFWLC	0	1	4	57	194	51	0	0	0	0	0	0	0	0	0	0
MCCYNLFSLFRAC	0	0	1	29	172	51	0	0	0	0	0	0	0	0	0	0
MCCYRCWLLFWCC	0	0	1	4	41	51	0	0	0	0	0	0	0	0	0	0
MCSNMWKLANCWWAC	0	1	2	30	151	51	0	0	0	0	0	0	0	0	0	0
MCSNMWKLANRCWVC	0	0	2	3	48	51	0	0	0	0	0	0	0	0	0	0
MCVPCFSHTLLCC	0	1	3	58	107	51	0	0	0	0	0	0	0	0	0	0
MCVRWPNMNALFWLC	0	1	6	21	114	51	0	0	0	0	0	0	0	0	0	0
MCYRHPHSNPLSWAC	0	1	3	35	93	51	0	0	0	0	0	0	0	0	0	0
MCYRHPHSNPLYWAC	0	4	0	24	87	51	0	0	0	0	0	0	0	0	0	0
MCCYNLFSLFCAC	0	3	0	11	99	50	0	0	0	0	0	0	0	0	0	0
MCIRWPARQSLFCLC	0	0	0	15	84	50	0	0	0	0	0	0	0	0	0	0
MCSNMWKLANHWWAC	0	0	2	19	111	50	0	0	0	0	0	0	0	0	0	0
MCSNMWKLANRCWAC	0	1	1	15	131	50	0	0	0	0	0	0	0	0	0	0
MCVRRPNLNALFWLC	0	1	3	32	143	50	0	0	0	0	0	0	0	0	0	0
MCVRWPYLNALFWLC	0	1	2	14	66	50	0	0	0	0	0	0	0	0	0	0
MCYKWPNRSHLYWLC	0	1	1	16	141	50	0	0	0	0	0	0	0	0	0	0
MCYQHPHSNPLFWAC	0	0	2	21	105	50	0	0	0	0	0	0	0	0	0	0
MCYRCFLASFWCC	0	1	1	30	127	50	0	0	0	0	0	0	0	0	0	0
MCYRFPSSRHLFWLC	0	0	3	6	146	50	0	0	0	0	0	0	0	0	0	0
MYIYRLSDFWVVC	0	1	0	4	68	50	0	0	0	0	0	0	0	0	0	0
MCCFKFRELFWVC	0	0	0	17	73	49	0	0	0	0	0	0	0	0	0	0
MCCYNLFSLFWDC	0	0	3	24	109	49	0	0	0	0	0	0	0	0	0	0
MCCYRCWSLFCCC	0	1	0	9	56	49	0	0	0	0	0	0	0	0	0	0
MCCYSLFSLFWAC	0	0	4	26	102	49	0	0	0	0	0	0	0	0	0	0
MCFFYPRRQPLYWIC	0	1	1	12	64	49	0	0	0	0	0	0	0	0	0	0
MCFVCFRHSLLCC	0	1	2	56	232	49	0	0	0	0	0	0	0	0	0	0
MCIVCFRHSFLCC	0	0	1	16	161	49	0	0	0	0	0	0	0	0	0	0
MCIYRLSDFSVVC	0	0	3	7	76	49	0	0	0	0	0	0	0	0	0	0
MCIYRLSDFWVVR	0	0	2	5	70	49	0	0	0	0	0	0	0	0	0	0
MCRTRFVNLFWLC	0	0	5	27	133	49	0	0	0	0	0	0	0	0	0	0
MCSNMWKLANRWWTC	0	0	3	62	133	49	0	0	0	0	0	0	0	0	0	0
MCSNMWKLVNRWWAC	0	0	2	20	116	49	0	0	0	0	0	0	0	0	0	0
MCSYMWKLANRWWVC	0	1	0	2	37	49	0	0	0	0	0	0	0	0	0	0
MCVRWPNLDALFWLC	0	0	2	45	111	49	0	0	0	0	0	0	0	0	0	0
MCYVCFSHSFICY	0	0	1	22	81	49	0	0	0	0	0	0	0	0	0	0
MCCFRCWSLFWCC	0	0	0	3	37	48	0	0	0	0	0	0	0	0	0	0
MCCTRFVNLFCLC	0	1	2	21	124	48	0	0	0	0	0	0	0	0	0	0
MCCYNLFPLFWAC	0	0	2	38	133	48	0	0	0	0	0	0	0	0	0	0
MCFRWQLFHHLTPFC	0	1	1	3	36	48	0	0	0	0	0	0	0	3	0	0
MCFRWRLCHHLTPYC	0	0	0	10	78	48	0	0	0	0	0	0	0	0	0	0
MCFRWRLFHHLTLYC	0	2	1	17	81	48	0	0	0	0	0	0	0	0	0	0
MCIGKWYTYHYWTRC	0	0	2	7	103	48	0	0	0	0	0	0	0	0	0	0
MCLLWARHFDRYWVC	0	2	5	28	182	48	0	0	0	0	0	0	0	0	0	0
MCTKSPWPFPIFWAC	0	0	3	63	168	48	0	0	0	0	0	0	0	0	0	0
MCVRWPNLSALFWLC	0	2	1	33	103	48	0	0	0	0	0	0	0	0	0	0
MCWYCSRKSFWCC	0	1	2	62	210	48	0	0	0	0	0	0	0	0	0	0
MCYKWPIRSHLHWLC	0	0	2	26	122	48	0	0	0	0	0	0	0	0	0	0
MCYLCFSHSFICC	0	0	3	23	71	48	0	0	0	0	0	0	0	0	0	0
MCFRWRLFHHWTPYC	0	1	0	6	69	47	0	0	0	0	0	0	0	0	0	0
MCFVYPRRQPLYWKC	0	0	0	6	110	47	0	0	0	0	0	0	0	0	0	0
MCFVYPRSQPLYWIC	0	0	0	7	76	47	0	0	0	0	0	0	0	0	0	0
MCTKFPWPFPIYWAC	0	0	2	25	108	47	0	0	0	0	0	0	0	0	0	0
MCWSLYGLFWAC	0	0	2	18	96	47	0	0	0	0	0	0	0	0	0	0
MCARWPNLNALFWLC	0	0	0	31	126	46	0	0	0	0	0	0	0	0	0	0
MCCTRFVNLFRLC	0	0	3	25	134	46	0	0	0	0	0	0	0	0	0	0
MCCYNLFSLYWIC	0	1	1	0	161	46	0	0	0	0	0	0	0	0	0	0
MCFRWRLFQHLTPFC	0	0	0	1	32	46	0	0	0	0	0	0	0	2	0	0
MCFVCFRHSFICC	0	0	0	1	53	46	0	0	0	0	0	0	0	0	0	0
MCIYRLSYFWVVC	0	0	2	3	65	46	0	0	0	0	0	0	0	0	0	0
MCLLWTRHFDRFWVC	0	0	0	6	85	46	0	0	0	0	0	0	0	0	0	0
MCRLCFSKLFLFC	0	0	0	9	53	46	0	0	0	0	0	0	0	0	0	0
MCSNMWKLANRWWAS	0	0	2	15	148	46	0	0	0	0	0	0	0	0	0	0
MCWYCFRKSFCCC	0	1	1	21	114	46	0	0	0	0	0	0	0	0	0	0
MCWYCFRKSFRCC	0	0	4	61	236	46	0	0	0	0	0	0	0	0	0	0
MCYVCFSHSFVCC	0	0	1	28	84	46	0	0	0	0	0	0	0	0	0	0
MYFVYPRRQPLYWIC	0	1	2	6	79	46	0	0	0	0	0	0	0	0	0	0
MCFRWRLFHQLTPFC	0	0	0	4	39	45	0	0	0	0	0	0	0	0	0	0
MCFVYPRRQPLYSIC	0	0	1	9	46	45	0	0	0	0	0	0	0	0	0	0
MCTRTSFHGFWYYAC	0	0	1	30	161	45	0	0	0	0	0	0	0	3	0	0
MSFRWRLFHHLTPYC	0	0	1	5	94	45	0	0	0	0	0	0	0	0	0	0
MCCRHPHSNPLFWAC	0	0	1	21	58	44	0	0	0	0	0	0	0	0	0	0
MCCYNLFSLFWVVC	0	2	1	0	182	44	0	0	0	0	0	0	0	0	0	0
MCFRRRLFHHLTPFC	0	1	0	5	43	44	0	0	0	0	0	0	0	2	0	0
MCFVCLRHSFLCC	0	1	6	48	149	44	0	0	0	0	0	0	0	0	0	0
MCIGKWYTYRYWTHC	0	0	0	9	80	44	0	0	0	0	0	0	0	0	0	0
MCIRWPARQSLFWMC	0	0	0	4	47	44	0	0	0	0	0	0	0	0	0	0
MCRLCFSKVFWCC	0	0	0	5	61	44	0	0	0	0	0	0	0	0	0	0
MCSNLWKLANRWWVC	0	0	0	1	27	44	0	0	0	0	0	0	0	0	0	0
MCTQTSFYGFWYYAC	0	0	0	32	113	44	0	0	0	0	0	0	0	0	0	0
MCVRWPNLNALFWRC	0	0	3	23	80	44	0	0	0	0	0	0	0	0	0	0
MFIYRLSDFWVVC	0	1	1	4	58	44	0	0	0	0	0	0	0	0	0	0
MCCYNSFSLFWAC	0	0	0	27	105	43	0	0	0	0	0	0	0	0	0	0
MCCYRCWSMFWCC	0	2	1	5	50	43	0	0	0	0	0	0	0	0	0	0
MCFHCFARRFWCC	0	0	1	8	98	43	0	0	0	0	0	0	0	0	0	0
MCICWPARQSLFWLC	0	0	1	15	100	43	0	0	0	0	0	0	0	0	0	0
MCIRWPARQPLFWPC	0	2	3	8	43	43	0	0	0	0	0	0	0	0	0	0
MCSNMWKLANRSWVC	0	0	0	2	26	43	0	0	0	0	0	0	0	0	0	0
MCSNMWKLANRWWAY	0	1	3	5	85	43	0	0	0	0	0	0	0	0	0	0
MCTKFPWPFPISWAC	0	0	5	47	123	43	0	0	0	0	0	0	0	0	0	0
MCVRWPDLNALFWLC	0	2	2	17	98	43	0	0	0	0	0	0	0	0	0	0
MCYKCFTGLFLWC	0	1	4	31	125	43	0	0	0	0	0	0	0	0	0	0
MCYVCFSQSFICC	0	0	3	15	69	43	0	0	0	0	0	0	0	0	0	0
MCCNRCWSLFWCC	0	0	2	5	37	42	0	0	0	0	0	0	0	0	0	0
MCCTRFANLFWLC	0	1	1	38	142	42	0	0	0	0	0	0	0	0	0	0
MCFRCFLASFWLC	0	0	1	8	204	42	0	0	0	0	0	0	0	0	0	0
MCFRWLLFHHLTPYC	0	1	0	9	91	42	0	0	0	0	0	0	0	0	0	0
MCFRWRLYHHLTPFC	0	1	0	4	35	42	0	0	0	0	0	0	0	0	0	0
MCFVCFRHSSLCC	0	0	3	47	170	42	0	0	0	0	0	0	0	0	0	0
MCLLWTRHFDRYRVC	0	0	4	28	110	42	0	0	0	0	0	0	0	0	0	0
MCLLWTRHFGRYWVC	0	2	2	32	179	42	0	0	0	0	0	0	0	0	0	0
MCSRWRLFHHLTPFC	0	2	2	7	48	42	0	0	0	0	0	0	0	0	0	0
MCTRTSFYGFWYYTC	0	2	4	65	263	42	0	0	0	0	0	0	0	9	0	8
MCYKWPIWSHLYWLC	0	1	2	13	140	42	0	0	0	0	0	0	0	0	0	0
MCFVYPPRQPLYWIC	0	2	1	9	57	41	0	0	0	0	0	0	0	0	0	0
MCFVYPRRQPMYWLC	0	0	0	0	33	41	0	0	0	0	0	0	0	0	0	0
MCIRWRLFHHLTPFC	0	0	1	1	36	41	0	0	0	0	0	0	0	0	0	0
MCIYRFSDFWVVC	0	1	0	11	78	41	0	0	0	0	0	0	0	0	0	0
MCIYRLADFWVVC	0	0	0	6	51	41	0	0	0	0	0	0	0	0	0	2
MCTKFPWPFPIFWEC	0	2	2	28	141	41	0	0	0	0	0	0	0	0	0	0
MCTRTSFYGFCYYAC	0	2	1	18	120	41	0	0	0	0	0	0	0	2	0	0
MCTRTSFYGFWHYAC	0	3	3	22	117	41	0	0	0	0	0	0	0	4	0	3
MCVRWRLFHHLTPYC	0	0	0	7	50	41	0	0	0	0	0	0	0	0	0	0
MCYKWPIRSHLYWLS	0	0	2	19	98	41	0	0	0	0	0	0	0	0	0	0
MCYVCFSHSFNCC	0	0	2	16	66	41	0	0	0	0	0	0	0	0	0	0
MRIRWPARQSLFWLC	0	1	1	10	70	41	0	0	0	0	0	0	0	0	0	0
MCCYNLFSLYWAC	0	0	2	10	91	40	0	0	0	0	0	0	0	0	0	0
MCERWPNLNALFWLC	0	0	3	15	104	40	0	0	0	0	0	0	0	0	0	0
MCFRWRLFHHLKPYC	0	1	0	8	82	40	0	0	0	0	0	0	0	0	0	0
MCFVCFRRSFWCC	0	0	0	0	43	40	0	0	0	0	0	0	0	0	0	0
MCRLGFSKLFWCC	0	1	1	4	48	40	0	0	0	0	0	0	0	0	0	0
MCWYCFRKSFWSC	0	0	5	62	187	40	0	0	0	0	0	0	0	0	0	0
MCYKWPIRSHSYWLC	0	0	3	33	209	40	0	0	0	0	0	0	0	0	0	0
MCYRHPQSNPLFWAC	0	0	2	19	71	40	0	0	0	0	0	0	0	0	0	0
MCYVCFGHRFLCC	0	0	1	16	93	40	0	0	0	0	0	0	0	0	0	0
MCCYNLFSSFWAC	0	1	2	35	120	39	0	0	0	0	0	0	0	0	0	0
MCFVYPRRQQLYWIC	0	0	2	6	72	39	0	0	0	0	0	0	0	0	0	0
MCIPCFSHTFLCC	0	0	1	25	68	39	0	0	0	0	0	0	0	0	0	0
MCIRWPARQSLFWLY	0	1	3	12	96	39	0	0	0	0	0	0	0	0	0	0
MCIYRLSDFGVVC	0	0	0	3	41	39	0	0	0	0	0	0	0	0	0	0
MCTKFPWPFPIFWAS	0	0	1	15	84	39	0	0	0	0	0	0	0	0	0	0
MCTRTSFYGFWYYSC	0	2	2	22	111	39	0	0	0	0	0	0	0	0	2	0
MCYRHPHSNPLYWVC	0	0	0	6	35	39	0	0	0	0	0	0	0	0	0	0
MCYVSFSHSFICC	0	1	6	25	88	39	0	0	0	0	0	0	0	0	0	0
MSIYRLSDFWVVC	0	0	0	7	78	39	0	0	0	0	0	0	0	2	0	0
MCFRWRLFHHLTPSC	0	3	2	23	118	38	0	0	0	0	0	0	0	3	0	3
MCFVCFSNLFWCC	0	2	2	13	71	38	0	0	0	0	0	0	0	0	0	0
MCIRWPARQALFWLC	0	1	2	5	35	38	0	0	0	0	0	0	0	0	0	0
MCIRWPSRQSLFWLC	0	2	0	5	28	38	0	0	0	0	0	0	0	0	0	0
MCSNMWKLANRWCAC	0	0	2	9	69	38	0	0	0	0	0	0	0	0	0	0
MCTKFPWPIPIFWAC	0	0	2	12	93	38	0	0	0	0	0	0	0	0	0	0
MCTKFPWPYPIFWAC	0	0	2	18	91	38	0	0	0	0	0	0	0	0	0	0
MCVRWPARQSLFWCC	0	0	0	3	52	38	0	0	0	0	0	0	0	0	0	0
MCYKWPIRSHMYWLC	0	0	1	12	122	38	0	0	0	0	0	0	0	0	0	0
MCYRHPHNNPLFWVC	0	1	0	3	21	38	0	0	0	0	0	0	0	0	0	0
MCYRHPHSNPLFWAS	0	0	3	12	78	38	0	0	0	0	0	0	0	0	0	0
MCYRRPHSNPLFWAC	0	0	3	34	76	38	0	0	0	0	0	0	0	0	0	0
MCYVCFSHSFMCC	0	1	0	6	98	38	0	0	0	0	0	0	0	0	0	0
MYIRWPARQSLFWLC	0	0	0	8	64	38	0	0	0	0	0	0	0	0	0	0
MCCFKFRDLLWVC	0	0	1	31	127	37	0	0	0	0	0	0	0	0	0	0
MCCFKFRDLYWVC	0	0	1	11	88	37	0	0	0	0	0	0	0	0	0	0
MCCSRCFKSFWCC	0	0	0	4	56	37	0	0	0	0	0	0	0	0	0	0
MCFVCFRHSFWYC	0	0	0	0	25	37	0	0	0	0	0	0	0	0	0	0
MCFVNPRRQPLYWIC	0	0	0	14	78	37	0	0	0	0	0	0	0	0	0	0
MCPLCFSKLFWCC	0	0	1	8	54	37	0	0	0	0	0	0	0	0	0	0
MCQLWTRHFDRYWVC	0	1	1	12	95	37	0	0	0	0	0	0	0	0	0	0
MCTKFPWPFPNFWAC	0	0	2	27	104	37	0	0	0	0	0	0	0	0	0	0
MCYRHPHSNPLIWAC	0	0	0	19	72	37	0	0	0	0	0	0	0	0	0	0
MCCFKYRDLFWVC	0	0	2	4	56	36	0	0	0	0	0	0	0	4	0	0
MCCKWPIRSHLYWLC	0	0	0	18	102	36	0	0	0	0	0	0	0	0	0	0
MCCSRFVNLFWLC	0	0	2	20	81	36	0	0	0	0	0	0	0	0	0	0
MCCYRCFISFICC	0	2	45	256	426	36	0	0	0	0	0	0	0	0	0	0
MCFVCFSKLFWCC	0	0	0	2	48	36	0	0	0	0	0	0	0	0	0	0
MCFWWRLFHHLTPYC	0	0	1	13	65	36	0	0	0	0	0	0	0	0	0	0
MCIYRMSDFWVVC	0	0	1	6	58	36	0	0	0	0	0	0	0	0	0	0
MCLLRTRHFDRYWVC	0	0	2	35	127	36	0	0	0	0	0	0	0	0	0	0
MCLLWMRHFDRYWVC	0	1	3	13	130	36	0	0	0	0	0	0	0	0	0	0
MCTKFPWPFTIFWAC	0	1	0	15	71	36	0	0	0	0	0	0	0	0	0	0
MCTRTSFCGFWYYAC	0	1	3	37	131	36	0	0	0	0	0	0	0	3	0	0
MCTRTSFNGFWYYAC	0	1	4	10	81	36	0	0	0	0	0	0	0	0	0	0
MCYVYPRRQPLYWVC	0	0	1	2	19	36	0	0	0	0	0	0	0	0	0	0
MCYYRCWSLFWCC	0	0	1	3	34	36	0	0	0	0	0	0	0	0	0	0
MFFRWRLFHHLTPYC	0	0	0	9	45	36	0	0	0	0	0	0	0	0	0	0
MFFVYPRRQPLYWIC	0	0	0	6	49	36	0	0	0	0	0	0	0	0	0	0
MCCFKFRDMFWVC	0	1	2	16	100	35	0	0	0	0	0	0	0	0	0	0
MCCFKFRDSFWVC	0	0	10	30	156	35	0	0	0	0	0	0	0	0	0	0
MCIRWQARQSLFWLC	0	1	1	10	56	35	0	0	0	0	0	0	0	0	0	0
MCLLWTRHFDRYWVVC	0	1	1	1	121	35	0	0	0	0	0	0	0	0	0	0
MCPLIERLHNMFWVC	0	0	1	16	117	35	0	0	0	0	0	0	0	0	0	0
MCSNMWKLANRWWVS	0	1	0	0	30	35	0	0	0	0	0	0	0	0	0	0
MCSYGSWYGYRYLAC	0	2	1	17	112	35	0	0	0	0	0	0	0	0	0	0
MCTKFPWPFPIIWAC	0	1	2	13	75	35	0	0	0	0	0	0	0	0	0	0
MCTKFPWQFPIFWAC	0	0	1	15	67	35	0	0	0	0	0	0	0	0	0	0
MCVHCFDQLFWCC	0	0	0	8	101	35	0	0	0	0	0	0	0	0	0	0
MCWYCFRKSFWC	0	1	1	28	161	35	0	0	0	0	0	0	0	0	0	0
MCWYCFRKSFWIC	0	2	1	3	140	35	0	0	0	0	0	0	0	0	0	0
MCCYCCWSLFWCC	0	0	2	6	48	34	0	0	0	0	0	0	0	0	0	0
MCCYRCWSLFYCC	0	0	0	2	31	34	0	0	0	0	0	0	0	0	0	0
MCFRWRRFHHLTPYC	0	0	2	4	43	34	0	0	0	0	0	0	0	0	0	0
MCFVCFRHSFLC	0	1	1	24	102	34	0	0	0	0	0	0	0	0	0	0
MCFVRFRHSFLCC	0	1	3	38	137	34	0	0	0	0	0	0	0	0	0	0
MCIGKWYTYKYWTRC	0	1	1	9	64	34	0	0	0	0	0	0	0	0	0	0
MCIYRCWSLFWCC	0	0	1	0	7	34	0	0	0	0	0	0	0	0	0	0
MCWYCFRESFWCC	0	3	1	37	102	34	0	0	0	0	0	0	0	0	0	0
MCWYCFRKSFC	0	2	2	12	140	34	0	0	0	0	0	0	0	0	0	0
MCWYCFRKSSWCC	0	2	6	33	172	34	0	0	0	0	0	0	0	0	0	0
MCYVCFSHSFIFC	0	0	1	32	74	34	0	0	0	0	0	0	0	0	0	0
MCYVCFSHSFLCC	0	1	2	2	49	34	0	0	0	0	0	0	0	0	0	0
MCCCRCWSLFWCC	0	0	0	4	34	33	0	0	0	0	0	0	0	0	0	0
MCCFKFRDLFWGC	0	0	2	21	135	33	0	0	0	0	0	0	0	0	0	0
MCCFKFRDLYWLC	0	0	2	4	168	33	0	0	0	0	0	0	0	0	0	0
MCFMWRLFHHLTPYC	0	0	1	15	57	33	0	0	0	0	0	0	0	0	0	0
MCFRWRLFHHLTPYR	0	0	2	3	51	33	0	0	0	0	0	0	0	0	0	0
MCILWPARQSLFWLC	0	0	0	6	26	33	0	0	0	0	0	0	0	0	0	0
MCIRWPAHQPLFWLC	0	1	1	0	17	33	0	0	0	0	0	0	0	0	0	0
MCLRWRLFHHLTPCC	0	1	0	3	46	33	0	0	0	0	0	0	0	0	0	0
MCRLCFSKLFFCC	0	0	1	5	36	33	0	0	0	0	0	0	0	0	0	0
MCSNMWKLAIRWWVC	0	0	0	1	14	33	0	0	0	0	0	0	0	0	0	0
MCTKFPWLFPIFWAC	0	1	1	31	89	33	0	0	0	0	0	0	0	0	0	0
MCTRTSFYGFWYYAY	0	0	0	15	77	33	0	0	0	0	0	0	0	0	0	0
MCYKCFAGLFLCC	0	0	0	7	77	33	0	0	0	0	0	0	0	0	0	0
MCYKWPIRSHLFWAC	0	0	0	1	65	33	0	0	0	0	0	0	0	0	0	0
MCYKWPIRSPLYWIC	0	0	0	0	8	33	0	0	0	0	0	0	0	0	0	0
MCYLHPHSNPLFWAC	0	1	0	10	31	33	0	0	0	0	0	0	0	0	0	0
MSIRWPARQSLFWLC	0	0	0	6	54	33	0	0	0	0	0	0	0	0	0	0
MCCYRCWSLFWCS	0	0	0	2	31	32	0	0	0	0	0	0	0	0	0	0
MCCYRYWSLFWCC	0	1	0	3	30	32	0	0	0	0	0	0	0	0	0	0
MCFVYPRRQSLFWLC	0	0	0	1	50	32	0	0	0	0	0	0	0	0	0	0
MCKYHRVFYLAPFSC	0	0	0	4	46	32	0	0	0	0	0	0	0	0	0	0
MCLVYPRRQPLYWLC	0	0	0	0	18	32	0	0	0	0	0	0	0	0	0	0
MCSNMWKLANRWCVC	0	0	0	2	17	32	0	0	0	0	0	0	0	0	0	0
MCSQSWVLYELWRAC	0	1	3	25	111	32	0	0	0	0	0	0	0	0	0	0
MCYKWPIRSHLYWLY	0	0	0	12	75	32	0	0	0	0	0	0	0	0	0	0
MCYRHPHSNPMFWAC	0	1	0	9	57	32	0	0	0	0	0	0	0	0	0	0
MCYRHPHSYPLFWAC	0	0	0	9	41	32	0	0	0	0	0	0	0	0	0	0
MCYVCFERRFLCC	0	0	1	5	58	32	0	0	0	0	0	0	0	0	0	0
MCYVCYSHSFICC	0	1	0	14	71	32	0	0	0	0	0	0	0	0	0	0
MCYVYPRRQPLYWLC	0	0	1	0	20	32	0	0	0	0	0	0	0	0	0	0
MRSNMWKLANRWWAC	0	1	2	4	86	32	0	0	0	0	0	0	0	0	0	0
MCCFKFRDLFLVC	0	0	2	20	75	31	0	0	0	0	0	0	0	0	0	0
MCCYNLFSMFWAC	0	1	0	10	64	31	0	0	0	0	0	0	0	0	0	0
MCCYRCWALFWCC	0	0	0	0	25	31	0	0	0	0	0	0	0	0	0	0
MCFRWRLFHHLTPIC	0	0	2	5	30	31	0	0	0	0	0	0	0	0	0	3
MCFVYPLRQPLYWIC	0	0	0	4	33	31	0	0	0	0	0	0	0	0	0	0
MCIRWPACQPLFWLC	0	0	0	1	21	31	0	0	0	0	0	0	0	0	0	0
MCIRWPARQYLFWLC	0	0	0	6	33	31	0	0	0	0	0	0	0	0	0	0
MCRRKPRTSSRWQPC	0	3	156	717	512	31	0	0	0	0	0	0	0	0	0	0
MCSNMWKLANRLWAC	0	0	0	10	53	31	0	0	0	0	0	0	0	0	0	0
MCSNMWKLTNRWWVC	0	0	0	3	30	31	0	0	0	0	0	0	0	0	0	0
MCVKCFRYRYWCC	0	0	3	24	135	31	0	0	0	0	0	0	0	0	0	0
MCVPCFSHTSLCC	0	0	3	56	70	31	0	0	0	0	0	0	0	0	0	0
MCWPLYRLFWAC	0	0	3	35	125	31	0	0	0	0	0	0	0	0	0	0
MCYRHPHSNPLFWEC	0	0	5	28	48	31	0	0	0	0	0	0	0	0	0	0
MCYVCFSHSIICC	0	0	0	9	49	31	0	0	0	0	0	0	0	0	0	0
MCCFKFRDLFWMC	0	0	1	9	66	30	0	0	0	0	0	0	0	0	0	0
MCCYRFWSLFWCC	0	0	0	1	10	30	0	0	0	0	0	0	0	0	0	0
MCCYRSWSLFWCC	0	0	1	2	18	30	0	0	0	0	0	0	0	0	0	0
MCFRWPLFHHLTPYC	0	0	1	6	42	30	0	0	0	0	0	0	0	0	0	0
MCFRWRLFYHLTPFC	0	0	0	1	23	30	0	0	0	0	0	0	0	0	0	0
MCFRWRPFHHLTPFC	0	0	0	5	37	30	0	0	0	0	0	0	0	0	0	0
MCFRWWLFHHLTPFC	0	0	0	2	36	30	0	0	0	0	0	0	0	0	0	0
MCFVCFRHPFLCC	0	0	2	40	123	30	0	0	0	0	0	0	0	0	0	0
MCFVCFRHSFLSC	0	0	4	67	167	30	0	0	0	0	0	0	0	0	0	0
MCFVCFRHSFWWC	0	1	0	1	26	30	0	0	0	0	0	0	0	0	0	0
MCFVCSRHSFLCC	0	0	1	31	104	30	0	0	0	0	0	0	0	0	0	0
MCICCMGFAWTFC	0	2	0	8	90	30	0	0	0	0	0	0	0	0	0	0
MCIGKWYTYLYWTRC	0	1	0	12	122	30	0	0	0	0	0	0	0	0	0	0
MCIGKWYTYQYWMRC	0	1	3	16	111	30	0	0	0	0	0	0	0	0	0	0
MCLMWTRHFDRYWVC	0	0	2	10	90	30	0	0	0	0	0	0	0	0	0	0
MCSRSWVLYELWRVC	0	0	5	18	61	30	0	0	0	0	0	0	0	0	0	0
MCTRTSFYGFWYYAS	0	2	2	16	110	30	0	0	0	0	0	0	0	0	0	0
MCVRWPNLNALYWLC	0	0	2	17	88	30	0	0	0	0	0	0	0	0	0	0
MCYRHPHSNLLFWAC	0	0	2	17	56	30	0	0	0	0	0	0	0	0	0	0
MCYRHPHSNQLFWAC	0	0	1	9	37	30	0	0	0	0	0	0	0	0	0	0
MCYVCFSNSFICC	0	0	0	17	67	30	0	0	0	0	0	0	0	0	0	0
MCCFKCFNLFYCC	0	0	0	9	46	29	0	0	0	0	0	0	0	0	0	0
MCCTRFVNLFWHC	0	0	5	17	62	29	0	0	0	0	0	0	0	0	0	0
MCCYNLFSFFWAC	0	0	1	6	40	29	0	0	0	0	0	0	0	0	0	0
MCFVCFRHSFMCC	0	1	1	14	113	29	0	0	0	0	0	0	0	0	0	0
MCFVYPRRQPLYLIC	0	1	3	10	70	29	0	0	0	0	0	0	0	0	0	0
MCFVYPRRQPMYWVC	0	0	0	0	21	29	0	0	0	0	0	0	0	0	0	0
MCIGKWYTYQYWTSC	0	1	0	19	142	29	0	0	0	0	0	0	0	0	0	0
MCIRWPPRQSLFWLC	0	0	0	10	52	29	0	0	0	0	0	0	0	0	0	0
MCLLWTRHFERYWVC	0	0	0	9	71	29	0	0	0	0	0	0	0	0	0	0
MCLVCFRHSFWCC	0	1	0	2	31	29	0	0	0	0	0	0	0	0	0	0
MCRLCFSKLFWKC	0	1	1	1	44	29	0	0	0	0	0	0	0	0	0	0
MCRLCFSRLFWLC	0	0	0	1	46	29	0	0	0	0	0	0	0	0	0	0
MCRLCFSTLFWCC	0	0	0	4	26	29	0	0	0	0	0	0	0	0	0	0
MCSNMWKLANLWWVC	0	0	2	0	15	29	0	0	0	0	0	0	0	0	0	0
MCSYGSWYGYSYWAC	0	0	1	2	68	29	0	0	0	0	0	0	0	0	0	0
MCSYNLFSLFWAC	0	1	2	19	89	29	0	0	0	0	0	0	0	0	0	0
MCTRTSFYGFWCYAC	0	1	2	23	82	29	0	0	0	0	0	0	0	0	0	0
MCTRTSIYGFWYYAC	0	0	1	9	62	29	0	0	0	0	0	0	0	0	0	0
MCVPCFSHTFLSC	0	1	6	78	76	29	0	0	0	0	0	0	0	0	0	0
MCVRWPNLNAIFWLC	0	0	0	12	76	29	0	0	0	0	0	0	0	0	0	0
MCVRWRYWPAWIC	0	2	1	6	106	29	0	0	0	0	0	0	0	0	0	0
MCYRHPHSNPLFCAC	0	0	1	11	40	29	0	0	0	0	0	0	0	0	0	0
MCYRWRLYHHLTPYC	0	0	1	1	30	29	0	0	0	0	0	0	0	0	0	0
MCCTRSVNLFWLC	0	0	1	36	98	28	0	0	0	0	0	0	0	0	0	0
MCCYNLVSLFWAC	0	0	1	15	79	28	0	0	0	0	0	0	0	0	0	0
MCCYRCWSLFWCY	0	0	0	4	51	28	0	0	0	0	0	0	0	0	0	0
MCFRWRLFHHLSPYC	0	0	1	7	57	28	0	0	0	0	0	0	0	0	0	0
MCFRWRLFHHSTPFC	0	0	0	9	38	28	0	0	0	0	0	0	0	2	0	2
MCFRWRLFHLLTPYC	0	0	0	11	84	28	0	0	0	0	0	0	0	0	0	0
MCFVCFKHSFLCC	0	1	0	16	92	28	0	0	0	0	0	0	0	0	0	0
MCIYRLSDFWFVC	0	0	1	6	49	28	0	0	0	0	0	0	0	0	0	0
MCLRWPNLNALFWLC	0	0	1	13	41	28	0	0	0	0	0	0	0	0	0	0
MCRKYPWFTPLFNLC	0	1	1	26	56	28	0	0	0	0	0	0	0	0	0	0
MCSNLWKLANRWWAC	0	0	1	12	70	28	0	0	0	0	0	0	0	0	0	0
MCSNMWKFANRWWAC	0	1	0	9	39	28	0	0	0	0	0	0	0	0	0	0
MCWSLYKLFWAC	0	1	3	16	61	28	0	0	0	0	0	0	0	0	0	0
MCYMCFSHSFICC	0	1	0	20	63	28	0	0	0	0	0	0	0	0	0	0
MCYRYPHSNPLFWVC	0	1	0	1	20	28	0	0	0	0	0	0	0	0	0	0
MCYVCFSHYFICC	0	1	0	6	44	28	0	0	0	0	0	0	0	0	0	0
MCYVCFSYSFICC	0	0	0	19	57	28	0	0	0	0	0	0	0	0	0	0
MCYVYFSHSFICC	0	0	2	21	37	28	0	0	0	0	0	0	0	0	0	0
MCFRWRLFHHFTPFC	0	0	0	0	18	27	0	0	0	0	0	0	0	0	0	0
MCFRWRLFHHLTTFC	0	1	0	1	25	27	0	0	0	0	0	0	0	0	0	0
MCFVCFRHSFSCC	0	0	3	41	140	27	0	0	0	0	0	0	0	0	0	0
MCFVYPRRQPLYWIR	0	0	0	7	63	27	0	0	0	0	0	0	0	0	0	0
MCIGKWYTYQYWTPC	0	1	4	29	164	27	0	0	0	0	0	0	0	0	0	0
MCIRCPARQSLFWLC	0	0	5	13	59	27	0	0	0	0	0	0	0	0	0	0
MCLLWSRHFDRYWVC	0	0	0	6	43	27	0	0	0	0	0	0	0	0	0	0
MCLLWTRHYDRYWVC	0	1	0	6	59	27	0	0	0	0	0	0	0	0	0	0
MCNQSWVLYELWRVC	0	1	1	5	47	27	0	0	0	0	0	0	0	2	0	0
MCPFWMYHYIPSC	0	0	130	150	217	27	0	0	0	0	0	0	0	0	0	0
MCRLCFSQLFWCC	0	0	1	2	24	27	0	0	0	0	0	0	0	0	0	0
MCSNMWKLANRWWVVC	0	0	0	1	20	27	0	0	0	0	0	0	0	0	0	0
MCSTRFVNLFWLC	0	0	1	21	71	27	0	0	0	0	0	0	0	0	0	0
MCSYRLSDFWVVC	0	0	1	4	43	27	0	0	0	0	0	0	0	0	0	0
MCTKFPWPFPMFWVC	0	0	0	0	14	27	0	0	0	0	0	0	0	0	0	0
MCTRTSFYGFWYCAC	0	0	2	27	107	27	0	0	0	0	0	0	0	2	0	0
MCWYRFRKSFWCC	0	0	4	44	155	27	0	0	0	0	0	0	0	0	0	0
MCYRFPSSRPLFWAC	0	0	0	2	33	27	0	0	0	0	0	0	0	0	0	0
MCYRHPHSNPLFWAY	0	0	2	8	39	27	0	0	0	0	0	0	0	0	0	0
MCYRHPHSNTLFWAC	0	0	1	17	67	27	0	0	0	0	0	0	0	0	0	0
MRYKWPIRSHLYWLC	0	0	0	9	60	27	0	0	0	0	0	0	0	0	0	0
MRYVCFSHSFICC	0	0	0	11	44	27	0	0	0	0	0	0	0	0	0	0
MSSNMWKLANRWWAC	0	0	0	5	49	27	0	0	0	0	0	0	0	0	0	0
MCCFKLCSLFWCC	0	0	1	8	136	26	0	0	0	0	0	0	0	0	0	0
MCCFKLCSLFWLC	0	1	0	9	105	26	0	0	0	0	0	0	0	0	0	0
MCCYNLISLFWAC	0	0	2	8	38	26	0	0	0	0	0	0	0	0	0	0
MCCYRLSDFWVVC	0	0	0	0	22	26	0	0	0	0	0	0	0	0	0	0
MCCYSCWSLFWCC	0	1	0	0	35	26	0	0	0	0	0	0	0	0	0	0
MCFGYPRRQPLYWIC	0	1	1	3	36	26	0	0	0	0	0	0	0	0	0	0
MCFRCFASLFWCC	0	0	0	18	53	26	0	0	0	0	0	0	0	0	0	0
MCFRWRLFQQLTPYC	0	0	1	5	32	26	0	0	0	0	0	0	0	0	0	0
MCFVYPRLQPLYWIC	0	0	0	7	50	26	0	0	0	0	0	0	0	0	0	0
MCIRWPARQPLFRLC	0	1	0	3	27	26	0	0	0	0	0	0	0	0	0	0
MCIRWPARQSLFLLC	0	0	3	14	72	26	0	0	0	0	0	0	0	0	0	0
MCIRWRYWPAWLC	0	0	1	23	93	26	0	0	0	0	0	0	0	0	0	0
MCIRWTARQSLFWLC	0	0	0	7	46	26	0	0	0	0	0	0	0	0	0	0
MCRFCFSKLFLCC	0	0	0	3	31	26	0	0	0	0	0	0	0	0	0	0
MCRLCFRHSFLCC	0	0	0	0	48	26	0	0	0	0	0	0	0	0	0	0
MCSIMWKLANRWWVC	0	1	0	3	26	26	0	0	0	0	0	0	0	0	0	0
MCSNMLKLANRWWVC	0	0	0	0	19	26	0	0	0	0	0	0	0	0	0	0
MCTKIPWPFPIFWAC	0	0	1	13	49	26	0	0	0	0	0	0	0	0	0	0
MCTRTRFYGFWYYAC	0	0	0	12	74	26	0	0	0	0	0	0	0	0	0	0
MCTRTSFYGFWYFAC	0	0	1	16	102	26	0	0	0	0	0	0	0	0	0	0
MCVPCFSHMFLCC	0	0	1	17	57	26	0	0	0	0	0	0	0	0	0	0
MCVRWPNLNALFWLS	0	0	1	14	60	26	0	0	0	0	0	0	0	0	0	0
MCVRWPNLNALFWMC	0	2	2	24	117	26	0	0	0	0	0	0	0	0	0	0
MCWYCFRKGFWCC	0	0	1	35	127	26	0	0	0	0	0	0	0	0	0	0
MCCPCFLRTFLCC	0	2	121	522	291	25	0	0	0	0	0	0	0	0	0	0
MCCTRFVNLSWLC	0	0	1	24	83	25	0	0	0	0	0	0	0	0	0	0
MCCYNLFTLFWAC	0	0	1	9	58	25	0	0	0	0	0	0	0	0	0	0
MCFACFRHSFWCC	0	0	0	2	17	25	0	0	0	0	0	0	0	0	0	0
MCFRCFLASFWRC	0	1	2	35	78	25	0	0	0	0	0	0	0	0	0	0
MCFRCFMASFWCC	0	1	1	8	37	25	0	0	0	0	0	0	0	0	0	0
MCFRWRLIHHLTPFC	0	0	0	1	27	25	0	0	0	0	0	0	0	0	0	0
MCFVCFGHSFLCC	0	0	2	21	102	25	0	0	0	0	0	0	0	0	0	0
MCIGKRYTYQYWTRC	0	1	2	20	118	25	0	0	0	0	0	0	0	0	0	0
MCIGKWYTYQYWIC	0	0	1	2	88	25	0	0	0	0	0	0	0	0	0	0
MCIHWPARQPLFWLC	0	1	0	0	10	25	0	0	0	0	0	0	0	0	0	0
MCNVCFSHSFICC	0	0	0	13	56	25	0	0	0	0	0	0	0	0	0	0
MCRLCCSKLFWCC	0	0	0	6	22	25	0	0	0	0	0	0	0	0	0	0
MCRYGSWYGYSYLAC	0	1	0	9	82	25	0	0	0	0	0	0	0	0	0	0
MCSHMWKLANRWWVC	0	1	0	0	16	25	0	0	0	0	0	0	0	0	0	0
MCSNMWKLANRWWVY	0	0	1	1	28	25	0	0	0	0	0	0	0	0	0	0
MCSNMWKLDNRWWAC	0	2	1	5	49	25	0	0	0	0	0	0	0	0	0	0
MCSNMWKLDNRWWVC	0	0	0	1	15	25	0	0	0	0	0	0	0	0	0	0
MCTKFPLPFPIFWAC	0	1	0	8	59	25	0	0	0	0	0	0	0	0	0	0
MCTKFPWPFPIFWAY	0	0	1	9	61	25	0	0	0	0	0	0	0	0	0	0
MCVRWPNLNALFCLC	0	0	0	6	32	25	0	0	0	0	0	0	0	0	0	0
MCYICFSGLFWCC	0	0	0	1	13	25	0	0	0	0	0	0	0	0	0	0
MCYRHPHSNPLFWTC	0	0	1	27	52	25	0	0	0	0	0	0	0	0	0	0
MCYRHPNSNPLFWAC	0	0	0	5	45	25	0	0	0	0	0	0	0	0	0	0
MCYVCFSLSFICC	0	0	1	13	39	25	0	0	0	0	0	0	0	0	0	0
MCYVWFSHSFICC	0	0	1	8	29	25	0	0	0	0	0	0	0	0	0	0
MCANMWKLANRWWAC	0	0	0	3	40	24	0	0	0	0	0	0	0	0	0	0
MCCRWRLFHHLTPYC	0	0	0	5	50	24	0	0	0	0	0	0	0	0	0	0
MCCTRFVNLYWLC	0	1	2	7	60	24	0	0	0	0	0	0	0	0	0	0
MCCYNLFSLFWAS	0	0	0	9	59	24	0	0	0	0	0	0	0	0	0	0
MCFRWRLFHHLTPVC	0	0	1	2	23	24	0	0	0	0	0	0	0	0	0	0
MCFVCFRHSFFCC	0	1	0	19	84	24	0	0	0	0	0	0	0	0	0	0
MCIGRWYTYQYWTHC	0	0	0	0	38	24	0	0	0	0	0	0	0	0	0	0
MCIRWPARQPQFWLC	0	0	0	0	15	24	0	0	0	0	0	0	0	0	0	0
MCIRWPARQSLFSLC	0	0	1	8	27	24	0	0	0	0	0	0	0	0	0	0
MCIRWPARQSLFWLR	0	0	0	15	33	24	0	0	0	0	0	0	0	0	0	0
MCIRWPARRSLFWIC	0	1	0	0	19	24	0	0	0	0	0	0	0	0	0	0
MCLLWTRHFDKYWVC	0	0	1	13	75	24	0	0	0	0	0	0	0	0	0	0
MCLLWTRHFDRYC	0	1	1	8	59	24	0	0	0	0	0	0	0	0	0	0
MCLLWTRRFDRYWVC	0	1	0	9	43	24	0	0	0	0	0	0	0	0	0	0
MCMYRLSDFWVVC	0	2	2	5	34	24	0	0	0	0	0	0	0	2	0	2
MCSNMWKRANRWWVC	0	0	0	0	17	24	0	0	0	0	0	0	0	0	0	0
MCTKFPWPFPIFWTC	0	0	3	46	73	24	0	0	0	0	0	0	0	0	0	0
MCTKFPWPFPVFWAC	0	1	3	20	73	24	0	0	0	0	0	0	0	0	0	0
MCTKFPWPSPIFWVC	0	0	0	4	15	24	0	0	0	0	0	0	0	0	0	0
MCTRTSFYGFWNYAC	0	0	1	14	84	24	0	0	0	0	0	0	0	0	0	0
MCTRTSFYGFWYNAC	0	0	2	15	74	24	0	0	0	0	0	0	0	5	0	0
MCVPCFSYTFLCC	0	1	1	29	53	24	0	0	0	0	0	0	0	0	0	0
MCVRCFEQLFWCC	0	0	0	6	38	24	0	0	0	0	0	0	0	0	0	0
MCVRWPNFNALFWLC	0	0	0	7	28	24	0	0	0	0	0	0	0	0	0	0
MCVRWPNLNAHFWLC	0	1	0	13	50	24	0	0	0	0	0	0	0	0	0	0
MCVRWPNLNTLFWLC	0	0	3	19	49	24	0	0	0	0	0	0	0	0	0	0
MCWYCFRKSFWCS	0	0	1	9	74	24	0	0	0	0	0	0	0	0	0	0
MCYVCFEHRFLWC	0	0	2	17	73	24	0	0	0	0	0	0	0	0	0	0
MRCYRCWSLFWCC	0	0	0	2	17	24	0	0	0	0	0	0	0	0	0	0
MRSNMWKLANRWWVC	0	0	0	0	27	24	0	0	0	0	0	0	0	0	0	0
MRTKFPWPFPIFWAC	0	0	0	14	46	24	0	0	0	0	0	0	0	0	0	0
MSCYRCWSLFWCC	0	0	0	2	17	24	0	0	0	0	0	0	0	0	0	0
MYTRTSFYGFWYYAC	0	0	0	3	49	24	0	0	0	0	0	0	0	0	0	0
MCCFKFRDFFWIC	0	0	0	3	26	23	0	0	0	0	0	0	0	0	0	0
MCCYRCWSLFWFC	0	0	0	3	27	23	0	0	0	0	0	0	0	0	0	2
MCFRWRLFHHLTPYCGC	0	0	0	2	86	23	0	0	0	0	0	0	0	0	0	0
MCFRWRLLHHLTPCC	0	0	1	5	40	23	0	0	0	0	0	0	0	0	0	0
MCIRWPARQSRFWLC	0	0	0	4	36	23	0	0	0	0	0	0	0	0	0	0
MCIRWPVRQPLFWLC	0	0	0	1	19	23	0	0	0	0	0	0	0	0	0	0
MCIYLLSDFWVVC	0	0	1	4	39	23	0	0	0	0	0	0	0	0	0	0
MCIYRLSDFWVVCGC	0	0	1	6	47	23	0	0	0	0	0	0	0	0	0	0
MCIYRLSHFWVVC	0	0	1	1	26	23	0	0	0	0	0	0	0	0	0	0
MCLLWTGHFDRYWVC	0	0	1	14	81	23	0	0	0	0	0	0	0	0	0	0
MCRLCFNRLFWCC	0	0	0	0	14	23	0	0	0	0	0	0	0	0	0	0
MCRLCFRKLLWCC	0	0	0	2	38	23	0	0	0	0	0	0	0	0	0	0
MCRLCFSKLFWYYAC	0	1	0	1	44	23	0	0	0	0	0	0	0	0	0	0
MCRLCFSKLLCCC	0	1	0	2	14	23	0	0	0	0	0	0	0	0	0	0
MCRQSWVLYELWRVC	0	0	0	6	53	23	0	0	0	0	0	0	0	0	0	0
MCSNMLKLANRWWAC	0	1	0	10	62	23	0	0	0	0	0	0	0	0	0	0
MCSNMWKLANRWWAR	0	0	0	9	50	23	0	0	0	0	0	0	0	0	0	0
MCTKFPWPFPIFLAC	0	0	2	13	56	23	0	0	0	0	0	0	0	0	0	0
MCWYCFRKSFWVVC	0	0	2	0	145	23	0	0	0	0	0	0	0	0	0	0
MCWYWFRKSFWCC	0	0	0	17	72	23	0	0	0	0	0	0	0	0	0	0
MCAKFPWPFPIFWVC	0	0	1	7	40	22	0	0	0	0	0	0	0	0	0	0
MCCTRFVSLFWLC	0	1	0	23	94	22	0	0	0	0	0	0	0	0	0	0
MCCYDLFSLFWAC	0	0	1	13	68	22	0	0	0	0	0	0	0	0	0	0
MCCYNLFSLFWTC	0	1	4	26	83	22	0	0	0	0	0	0	0	0	0	0
MCFHCFASRFLCC	0	0	3	11	65	22	0	0	0	0	0	0	0	0	0	0
MCFRCFLASFLCC	0	2	0	13	157	22	0	0	0	0	0	0	0	0	0	0
MCIRWPDRQSLFWLC	0	0	3	2	39	22	0	0	0	0	0	0	0	0	0	0
MCISWPARQSLFWLC	0	0	1	2	29	22	0	0	0	0	0	0	0	0	0	0
MCIYRLSDFCVLC	0	0	0	4	32	22	0	0	0	0	0	0	0	0	0	0
MCLLWTRHIDRYWVC	0	0	1	3	63	22	0	0	0	0	0	0	0	0	0	0
MCLLWTRHSDRYWVC	0	0	2	20	53	22	0	0	0	0	0	0	0	0	0	0
MCLRCFLASFWCC	0	1	3	49	86	22	0	0	0	0	0	0	0	0	0	0
MCRLCFNKLFWYC	0	0	0	1	33	22	0	0	0	0	0	0	0	0	0	0
MCRLCFSKHFWFC	0	0	0	1	8	22	0	0	0	0	0	0	0	0	0	0
MCRLCFSKLFWCCGC	0	1	1	9	53	22	0	0	0	0	0	0	0	0	0	0
MCSNMWKFANRWWVC	0	0	0	2	24	22	0	0	0	0	0	0	0	0	0	0
MCSQSWVLYGLWRVC	0	0	3	16	53	22	0	0	0	0	0	0	0	0	0	0
MCTKFPRPFPIFWVC	0	1	0	2	20	22	0	0	0	0	0	0	0	0	0	0
MCVRWPARQSLFWVC	0	1	0	1	15	22	0	0	0	0	0	0	0	0	0	0
MCVRWPNLNALSWLC	0	0	3	31	82	22	0	0	0	0	0	0	0	0	0	0
MCWYCFRKSFWVC	0	0	0	4	95	22	0	0	0	0	0	0	0	0	0	0
MCYKCFTGLLLCC	0	0	5	19	58	22	0	0	0	0	0	0	0	0	0	0
MCYRHPLSNPLFWAC	0	0	2	13	48	22	0	0	0	0	0	0	0	0	0	0
MCAPCFSHTFLCC	0	2	8	52	67	21	0	0	0	0	0	0	0	0	0	0
MCCCNLFSLFWAC	0	1	1	15	82	21	0	0	0	0	0	0	0	0	0	0
MCCFKFRGLFWVC	0	0	1	17	51	21	0	0	0	0	0	0	0	0	0	0
MCCTRCFSRFWCC	0	1	1	13	64	21	0	0	0	0	0	0	0	0	0	0
MCCVRYLARYWLC	0	0	0	10	53	21	0	0	0	0	0	0	0	0	0	0
MCCYNLFSLFWAY	0	0	1	7	68	21	0	0	0	0	0	0	0	0	0	0
MCCYNLFSLYWLC	0	0	0	2	148	21	0	0	0	0	0	0	0	0	0	0
MCFAYPRRQPLYWMC	0	0	0	5	36	21	0	0	0	0	0	0	0	0	0	0
MCFHCFAGRFWCC	0	0	2	19	72	21	0	0	0	0	0	0	0	0	0	0
MCFSWRLFHHLTPYC	0	0	1	3	44	21	0	0	0	0	0	0	0	0	0	0
MCIPWPARQSLFWLC	0	0	0	5	31	21	0	0	0	0	0	0	0	0	0	0
MCIRCFLASFWCC	0	0	0	7	47	21	0	0	0	0	0	0	0	0	0	0
MCIRRPARQPLFWLC	0	0	0	3	15	21	0	0	0	0	0	0	0	0	0	0
MCIYRLSDFWVFC	0	0	1	3	26	21	0	0	0	0	0	0	0	0	0	3
MCLLWTRYFDRYWVC	0	0	0	5	61	21	0	0	0	0	0	0	0	0	0	0
MCRLCFSKQFWCC	0	0	0	0	19	21	0	0	0	0	0	0	0	0	0	0
MCRLCFSRLFWYC	0	0	1	2	36	21	0	0	0	0	0	0	0	0	0	0
MCRRWPSREALYWIC	0	0	0	3	66	21	0	0	0	0	0	0	0	0	0	0
MCSNMWKLAIRWWAC	0	0	0	3	56	21	0	0	0	0	0	0	0	0	0	0
MCSNMWKLANLWWAC	0	1	0	4	31	21	0	0	0	0	0	0	0	0	0	0
MCWYCFRKSYWCC	0	0	1	12	102	21	0	0	0	0	0	0	0	0	0	0
MCYKWPILSHLYWLC	0	0	0	14	61	21	0	0	0	0	0	0	0	0	0	0
MCYKWPIRSHLCWLC	0	0	0	15	70	21	0	0	0	0	0	0	0	0	0	0
MCYKWPIRWHLYWLC	0	0	0	12	47	21	0	0	0	0	0	0	0	0	0	0
MCYKWSIRSHLYWLC	0	0	0	5	57	21	0	0	0	0	0	0	0	0	0	0
MCYRLPHSNPLFWAC	0	1	0	8	36	21	0	0	0	0	0	0	0	0	0	0
MCCFKFRDLFRVC	0	1	0	20	69	20	0	0	0	0	0	0	0	0	0	0
MCCFKFRDLSWVC	0	0	1	16	64	20	0	0	0	0	0	0	0	0	0	0
MCCFKSRDLFWVC	0	0	1	20	65	20	0	0	0	0	0	0	0	0	0	0
MCCIRFVNLFWLC	0	0	1	15	69	20	0	0	0	0	0	0	0	0	0	0
MCCTRFVNLFWLS	0	0	0	13	43	20	0	0	0	0	0	0	0	0	0	0
MCCVRYLARFWPC	0	1	6	37	61	20	0	0	0	0	0	0	0	0	0	0
MCCYNLFYLFWAC	0	0	2	2	23	20	0	0	0	0	0	0	0	0	0	0
MCFHCFASRFWYC	0	0	0	13	82	20	0	0	0	0	0	0	0	0	0	0
MCFRCLLASFWCC	0	0	5	21	66	20	0	0	0	0	0	0	0	0	0	0
MCFRWPARQPLFWLC	0	0	0	3	13	20	0	0	0	0	0	0	0	0	0	0
MCFRWRLFHHLTPYF	0	0	0	0	23	20	0	0	0	0	0	0	0	0	0	0
MCFRWRLFHHMTPFC	0	0	0	3	18	20	0	0	0	0	0	0	0	0	0	0
MCFVYPRHQPLYWLC	0	0	0	0	5	20	0	0	0	0	0	0	0	0	0	0
MCFVYPRRRPLYWLC	0	0	0	1	18	20	0	0	0	0	0	0	0	0	0	0
MCHKCFTGLFLCC	0	0	0	13	53	20	0	0	0	0	0	0	0	0	0	0
MCIGKWYTYQYRTRC	0	1	2	26	114	20	0	0	0	0	0	0	0	0	0	0
MCIRWPARHPLFWLC	0	0	1	1	9	20	0	0	0	0	0	0	0	0	0	0
MCIYRLSDFWGVC	0	0	0	1	19	20	0	0	0	0	0	0	0	0	0	0
MCLLWTRHFDRHWVC	0	0	3	16	67	20	0	0	0	0	0	0	0	0	0	0
MCPHPTLYLSMFWLC	0	1	52	196	139	20	0	0	0	0	0	0	0	0	0	0
MCRFCFSKLFWFC	0	1	0	0	24	20	0	0	0	0	0	0	0	0	0	0
MCRLCFGRLFWCC	0	0	0	0	27	20	0	0	0	0	0	0	0	0	0	0
MCRLCFSKHFRCC	0	0	1	1	20	20	0	0	0	0	0	0	0	0	0	0
MCRLCFSKLVWCC	0	0	0	0	28	20	0	0	0	0	0	0	0	0	0	0
MCRWCFSKLFWCC	0	1	0	6	30	20	0	0	0	0	0	0	0	0	0	0
MCSICFRRLFYCC	0	1	1	11	85	20	0	0	0	0	0	0	0	0	0	0
MCSNMWKLANRWVVC	0	1	1	1	37	20	0	0	0	0	0	0	0	0	0	0
MCTKFPWPFSIFWAC	0	0	1	13	29	20	0	0	0	0	0	0	0	0	0	0
MCTKFPWPLPIFWVC	0	0	1	7	26	20	0	0	0	0	0	0	0	0	0	0
MCVHWPNLNALFWLC	0	0	0	9	45	20	0	0	0	0	0	0	0	0	0	0
MCVRWPNLNALIWLC	0	1	0	17	47	20	0	0	0	0	0	0	0	0	0	0
MCVRWRYWPAWPC	0	0	8	52	67	20	0	0	0	0	0	0	0	0	0	0
MCYKWPIRSHLNWLC	0	1	1	8	63	20	0	0	0	0	0	0	0	0	0	0
MCYKWPSRSHLYWLC	0	0	0	5	69	20	0	0	0	0	0	0	0	0	0	0
MCYRHHHSNPLFWAC	0	0	3	5	20	20	0	0	0	0	0	0	0	0	0	0
MCYRHTHSNPLFWAC	0	0	3	5	33	20	0	0	0	0	0	0	0	0	0	0
MCYVCFSHSFICR	0	0	1	10	35	20	0	0	0	0	0	0	0	0	0	0
MCYWHPHSNPLFWAC	0	0	2	14	50	20	0	0	0	0	0	0	0	0	0	0
MFIRWPARQSLFWLC	0	0	0	4	38	20	0	0	0	0	0	0	0	0	0	0
MSTKFPWPFPIFWAC	0	0	1	4	26	20	0	0	0	0	0	0	0	0	0	0
MSYVCFSHSFICC	0	0	1	9	29	20	0	0	0	0	0	0	0	0	0	0
MYSNMWKLANRWWAC	0	0	0	7	49	20	0	0	0	0	0	0	0	0	0	0
MCCFKFHDLFWVC	0	1	1	4	69	19	0	0	0	0	0	0	0	0	0	0
MCCFKFRDLFC	0	0	0	6	45	19	0	0	0	0	0	0	0	0	0	0
MCCFKLRDLFWIC	0	1	0	1	20	19	0	0	0	0	0	0	0	0	0	0
MCCTRFENLFWLC	0	0	2	9	69	19	0	0	0	0	0	0	0	0	0	0
MCCYRCCSLFWCC	0	0	0	2	17	19	0	0	0	0	0	0	0	0	0	0
MCFECFRHSFLCC	0	1	2	12	64	19	0	0	0	0	0	0	0	0	0	0
MCFRCFLASLWCC	0	0	2	30	119	19	0	0	0	0	0	0	0	0	0	0
MCFRYPTRCPLFLLC	0	0	0	15	56	19	0	0	0	0	0	0	0	0	0	0
MCFVCFRHTFWCC	0	0	0	1	20	19	0	0	0	0	0	0	0	0	0	0
MCFVYPRREPLYWIC	0	0	0	2	17	19	0	0	0	0	0	0	0	0	0	0
MCFVYPRRPPLYWIC	0	2	1	5	26	19	0	0	0	0	0	0	0	0	0	0
MCHLCFNKLFWCC	0	0	0	0	11	19	0	0	0	0	0	0	0	0	0	0
MCIYRLSDFWIC	0	0	0	0	30	19	0	0	0	0	0	0	0	0	0	0
MCIYRLSELWVVC	0	1	0	3	24	19	0	0	0	0	0	0	0	0	0	0
MCLLWTRHFDRYYAC	0	0	1	1	180	19	0	0	0	0	0	0	0	0	0	0
MCLLWTRHFDSYWVC	0	0	0	8	46	19	0	0	0	0	0	0	0	0	0	0
MCRFKFRDLFWVC	0	0	2	8	68	19	0	0	0	0	0	0	0	0	0	0
MCRLCFSKLFWCW	0	0	0	3	12	19	0	0	0	0	0	0	0	0	0	0
MCRLCVSKLFWCC	0	0	0	5	24	19	0	0	0	0	0	0	0	0	0	0
MCSNMSKLANRWWAC	0	0	3	3	33	19	0	0	0	0	0	0	0	0	0	0
MCSNMWKLANRWWSC	0	0	2	5	36	19	0	0	0	0	0	0	0	0	0	0
MCSRCFLASFWCC	0	0	4	25	63	19	0	0	0	0	0	0	0	0	0	0
MCTGKWYTYQYWTRC	0	2	0	20	89	19	0	0	0	0	0	0	0	0	0	0
MCTKFPCPFPIFWAC	0	0	2	17	42	19	0	0	0	0	0	0	0	0	0	0
MCTLTSFYGFWYYAC	0	0	0	3	44	19	0	0	0	0	0	0	0	0	0	6
MCTRTSFYGIWYYAC	0	1	0	10	44	19	0	0	0	0	0	0	0	0	0	0
MCVRWPNLNALFWLY	0	0	0	9	48	19	0	0	0	0	0	0	0	0	0	0
MCWVCFQHSFICC	0	0	0	3	20	19	0	0	0	0	0	0	0	0	0	0
MCYKWPIRSHLYCLC	0	0	0	11	42	19	0	0	0	0	0	0	0	0	0	0
MCYKWPIRSYLYWLC	0	1	2	15	65	19	0	0	0	0	0	0	0	0	0	0
MCYRFPSSRHLLWAC	0	1	2	30	49	19	0	0	0	0	0	0	0	0	0	0
MWRLCFSKLFWCC	0	1	0	1	40	19	0	0	0	0	0	0	0	0	0	0
MYSNMWKLANRWWVC	0	0	0	0	17	19	0	0	0	0	0	0	0	0	0	0
MCCTRFMNLFWLC	0	1	0	6	39	18	0	0	0	0	0	0	0	0	0	0
MCCYNLFSLFWAR	0	1	0	7	28	18	0	0	0	0	0	0	0	0	0	0
MCCYNLFSLIWAC	0	0	0	6	45	18	0	0	0	0	0	0	0	0	0	0
MCFGWRLFHHLTPFC	0	0	1	2	19	18	0	0	0	0	0	0	0	0	0	0
MCFLCFASRFWCC	0	0	1	2	45	18	0	0	0	0	0	0	0	0	0	0
MCFRCFASRFWCC	0	0	2	18	34	18	0	0	0	0	0	0	0	0	0	0
MCFRSRLFHHLTPYC	0	0	0	3	20	18	0	0	0	0	0	0	0	0	0	0
MCFRWRYWPAWLC	0	0	0	3	54	18	0	0	0	0	0	0	0	0	0	0
MCFVCFRHSFWLC	0	0	0	1	24	18	0	0	0	0	0	0	0	0	0	0
MCFVYPRRRPLYWVC	0	0	1	0	28	18	0	0	0	0	0	0	0	0	0	0
MCIRWPARQPLFWHC	0	0	0	1	9	18	0	0	0	0	0	0	0	0	0	0
MCIRWPARQPLSWLC	0	0	0	3	24	18	0	0	0	0	0	0	0	0	0	0
MCIYRLSDFWVVF	0	0	0	2	14	18	0	0	0	0	0	0	0	0	0	0
MCLLWTRQFDRYWVC	0	0	0	6	32	18	0	0	0	0	0	0	0	0	0	0
MCRLCFIKLFCCC	0	0	0	2	22	18	0	0	0	0	0	0	0	0	0	0
MCRLCFSKHFLCC	0	0	0	2	21	18	0	0	0	0	0	0	0	0	0	0
MCRLCFSKLFCSC	0	0	0	5	32	18	0	0	0	0	0	0	0	0	0	0
MCRLCFSKLFWSS	0	0	0	0	26	18	0	0	0	0	0	0	0	0	0	0
MCSNMCKLANRWWAC	0	0	0	3	42	18	0	0	0	0	0	0	0	0	0	0
MCSNMWKLANRLWVC	0	0	0	2	12	18	0	0	0	0	0	0	0	0	0	0
MCSNMWNLANRWWVC	0	0	0	0	11	18	0	0	0	0	0	0	0	0	0	0
MCTRTSFFGFWYYAC	0	1	2	12	83	18	0	0	0	0	0	0	0	0	0	0
MCWYCFRKLFWCC	0	0	0	1	22	18	0	0	0	0	0	0	0	0	0	0
MCYRHPHCNPLFWAC	0	1	0	12	46	18	0	0	0	0	0	0	0	0	0	0
MCYTRFVNLFWLC	0	0	1	10	53	18	0	0	0	0	0	0	0	0	0	0
MCYVCFAHSFICC	0	0	0	5	21	18	0	0	0	0	0	0	0	0	0	0
MCYVYPRRQPLYWNC	0	0	0	2	18	18	0	0	0	0	0	0	0	0	0	0
MCYYNLFSLFWAC	0	0	1	8	52	18	0	0	0	0	0	0	0	0	0	0
MFCYRCWSLFWCC	0	0	1	0	13	18	0	0	0	0	0	0	0	0	0	0
MRYRHPHSNPLFWAC	0	0	1	5	29	18	0	0	0	0	0	0	0	0	0	0
MCAQKLFHYVPSC	0	1	110	140	125	17	0	0	0	0	0	0	0	0	0	0
MCCFRFRDLFWIC	0	0	0	1	17	17	0	0	0	0	0	0	0	0	0	0
MCCLCFSRLFWCC	0	0	0	6	20	17	0	0	0	0	0	0	0	0	0	0
MCCVYPRRQPLYWIC	0	0	0	7	22	17	0	0	0	0	0	0	0	0	0	0
MCCYCFRKSFWCC	0	0	3	9	56	17	0	0	0	0	0	0	0	0	0	0
MCFPCFCHTFYCC	0	0	3	69	44	17	0	0	0	0	0	0	0	0	0	0
MCFRCFLASFWAC	0	0	0	6	115	17	0	0	0	0	0	0	0	0	0	0
MCFRWRMFHHLTPFC	0	0	0	1	5	17	0	0	0	0	0	0	0	0	0	0
MCFVYPRRQPLYWTRC	0	1	1	4	54	17	0	0	0	0	0	0	0	0	0	0
MCFVYPRRQPWYWIC	0	0	0	5	35	17	0	0	0	0	0	0	0	0	0	0
MCIGKWYTYQYWTQC	0	1	0	10	84	17	0	0	0	0	0	0	0	0	0	0
MCIRWPARQPLIWLC	0	0	0	1	12	17	0	0	0	0	0	0	0	0	0	0
MCIYSLSDFCVVC	0	0	1	0	14	17	0	0	0	0	0	0	0	0	0	0
MCNRHPHSNPLFWAC	0	0	1	12	36	17	0	0	0	0	0	0	0	0	0	0
MCNRWPARQPLFWLC	0	0	0	2	10	17	0	0	0	0	0	0	0	0	0	0
MCRLCFSKHFWSC	0	0	0	4	26	17	0	0	0	0	0	0	0	0	0	0
MCRLCFSKLFCC	0	1	0	3	45	17	0	0	0	0	0	0	0	0	0	0
MCRLCFSKLFCFC	0	0	1	3	30	17	0	0	0	0	0	0	0	0	0	0
MCRLCFSRLFWWC	0	1	0	4	39	17	0	0	0	0	0	0	0	0	0	0
MCSNPVKYLSLYWLC	0	0	0	6	20	17	0	0	0	0	0	0	0	0	0	0
MCSYGSWYGYGYLAC	0	0	3	13	72	17	0	0	0	0	0	0	0	0	0	0
MCTKFPWPFPIFCAC	0	1	1	12	60	17	0	0	0	0	0	0	0	0	0	0
MCVPCFSHTFRCC	0	1	1	5	39	17	0	0	0	0	0	0	0	0	0	0
MCVPCSSHTFLCC	0	0	2	41	66	17	0	0	0	0	0	0	0	0	0	0
MCWYCFRKSFWCY	0	0	0	12	78	17	0	0	0	0	0	0	0	0	0	0
MCWYCFWKSFWCC	0	0	0	14	64	17	0	0	0	0	0	0	0	0	0	0
MCWYSFRKSFWCC	0	0	0	8	66	17	0	0	0	0	0	0	0	0	0	0
MCYEWPIRSHLYWLC	0	0	0	16	67	17	0	0	0	0	0	0	0	0	0	0
MCYKCFTGLFLYC	0	0	4	7	95	17	0	0	0	0	0	0	0	0	0	0
MCYRFPSSRHLFWIC	0	0	1	2	36	17	0	0	0	0	0	0	0	0	0	0
MCYRYPHSNPLFWLC	0	0	0	1	2	17	0	0	0	0	0	0	0	0	0	0
MFSNMWKLANRWWAC	0	0	0	5	39	17	0	0	0	0	0	0	0	0	0	0
MSYRHPHSNPLFWAC	0	0	0	4	27	17	0	0	0	0	0	0	0	0	0	0
MYYRHPHSNPLFWAC	0	0	3	1	17	17	0	0	0	0	0	0	0	0	0	0
MYYVCFSHSFICC	0	1	0	9	38	17	0	0	0	0	0	0	0	0	0	0
MCCDRCWSLFWCC	0	0	0	4	32	16	0	0	0	0	0	0	0	0	0	0
MCCFNLFSLFWAC	0	0	1	5	55	16	0	0	0	0	0	0	0	0	0	0
MCCYRCLSLFWCC	0	0	0	6	36	16	0	0	0	0	0	0	0	0	0	0
MCCYRCWSLIWCC	0	0	0	0	20	16	0	0	0	0	0	0	0	0	0	0
MCFHCFANRFWCC	0	0	0	4	48	16	0	0	0	0	0	0	0	0	0	0
MCFHCFASHFWCC	0	0	1	7	39	16	0	0	0	0	0	0	0	0	0	0
MCFMCFRHSFLCC	0	0	1	14	50	16	0	0	0	0	0	0	0	0	0	0
MCFRCFLATFWCC	0	1	0	13	59	16	0	0	0	0	0	0	0	0	0	0
MCFRWRLFDHLTPYC	0	0	0	1	15	16	0	0	0	0	0	0	0	0	0	0
MCFRWRLFNHLTPFC	0	0	0	1	19	16	0	0	0	0	0	0	0	0	0	0
MCFVCFEHRFLCC	0	1	0	3	25	16	0	0	0	0	0	0	0	0	0	0
MCFVCFRHSFLCY	0	0	2	11	59	16	0	0	0	0	0	0	0	0	0	0
MCFVCFRHSFRCC	0	0	0	0	10	16	0	0	0	0	0	0	0	0	0	0
MCHLCFSKLFWYC	0	0	0	0	14	16	0	0	0	0	0	0	0	0	0	0
MCIGNWYTYQYWTRC	0	0	0	4	28	16	0	0	0	0	0	0	0	0	0	0
MCIRLPARQSLFWLC	0	0	2	8	28	16	0	0	0	0	0	0	0	0	0	0
MCIRWPAPQSLFWLC	0	0	1	4	34	16	0	0	0	0	0	0	0	0	0	0
MCLLWTRHFDRYWDC	0	2	1	7	65	16	0	0	0	0	0	0	0	0	0	0
MCPNMWKLANRWWIC	0	0	0	0	8	16	0	0	0	0	0	0	0	0	0	0
MCRLCFSHSFICC	0	0	0	0	14	16	0	0	0	0	0	0	0	0	0	0
MCRLCFSKHIWCC	0	0	0	4	12	16	0	0	0	0	0	0	0	0	0	0
MCRLCFSKSFWCC	0	1	0	0	14	16	0	0	0	0	0	0	0	0	0	0
MCRRWPPREALYWLC	0	1	4	23	72	16	0	0	0	0	0	0	0	0	0	0
MCSNMWKIANRWWAC	0	0	1	6	29	16	0	0	0	0	0	0	0	0	0	0
MCSNMWKLANRWWPC	0	0	1	10	37	16	0	0	0	0	0	0	0	0	0	0
MCSNMWKRANRWWAC	0	0	0	6	35	16	0	0	0	0	0	0	0	0	0	0
MCTEFPWPFPIFWAC	0	0	1	27	60	16	0	0	0	0	0	0	0	0	0	0
MCTKFPWTFPIFWAC	0	0	0	8	34	16	0	0	0	0	0	0	0	0	0	0
MCTKFSWPFPIFWAC	0	0	0	12	29	16	0	0	0	0	0	0	0	0	0	0
MCTRKSFYGFWYYAC	0	1	1	4	48	16	0	0	0	0	0	0	0	0	0	0
MCTWTSFYGFWYYAC	0	0	1	21	62	16	0	0	0	0	0	0	0	2	0	3
MCVPCLSHTFLCC	0	1	1	44	62	16	0	0	0	0	0	0	0	0	0	0
MCVRWHYWPAWLC	0	1	0	11	51	16	0	0	0	0	0	0	0	0	0	0
MCVRWPARRSLFWLC	0	0	0	3	17	16	0	0	0	0	0	0	0	0	0	0
MCWCCFRKSFWCC	0	0	2	24	99	16	0	0	0	0	0	0	0	0	0	0
MCWSLYRLFWLC	0	0	0	0	68	16	0	0	0	0	0	0	0	0	0	0
MCWYYFRKSFWCC	0	0	0	11	50	16	0	0	0	0	0	0	0	0	0	0
MCYKWPIRSHLYWWC	0	1	1	7	58	16	0	0	0	0	0	0	0	0	0	0
MCYKWPIRSNLYWLC	0	0	0	1	32	16	0	0	0	0	0	0	0	0	0	0
MCYKWTIRSHLYWLC	0	0	0	5	30	16	0	0	0	0	0	0	0	0	0	0
MCYMWPIRSHLYWLC	0	0	3	12	47	16	0	0	0	0	0	0	0	0	0	0
MCYRHPRSNPLFWVC	0	0	0	0	18	16	0	0	0	0	0	0	0	0	0	0
MCYRWRLLHHLTPYC	0	0	0	2	19	16	0	0	0	0	0	0	0	0	0	0
MFCYNLFSLFWAC	0	0	3	2	22	16	0	0	0	0	0	0	0	0	0	0
MFTRTSFYGFWYYAC	0	0	2	3	35	16	0	0	0	0	0	0	0	0	0	0
MRCYNLFSLFWAC	0	0	0	3	39	16	0	0	0	0	0	0	0	0	0	0
MSSNMWKLANRWWVC	0	0	1	0	12	16	0	0	0	0	0	0	0	0	0	0
MCCFKFRDLFWFC	0	0	0	9	44	15	0	0	0	0	0	0	0	0	0	0
MCCFKLRDLFWCC	0	0	1	0	41	15	0	0	0	0	0	0	0	0	0	0
MCCTHFVNLFWLC	0	0	1	7	34	15	0	0	0	0	0	0	0	0	0	0
MCCYGSWYGYSYLAC	0	0	1	9	28	15	0	0	0	0	0	0	0	0	0	0
MCCYNMFSLFWAC	0	0	2	6	31	15	0	0	0	0	0	0	0	0	0	0
MCCYRCWSLFWCR	0	0	0	2	21	15	0	0	0	0	0	0	0	0	0	0
MCDPCFSHTFLCC	0	1	0	27	62	15	0	0	0	0	0	0	0	0	0	0
MCFAYPRRQPLFWLC	0	0	0	0	4	15	0	0	0	0	0	0	0	0	0	0
MCFGKWYTYQYWTHC	0	0	1	2	14	15	0	0	0	0	0	0	0	0	0	0
MCFHCFASRFWLC	0	0	1	4	81	15	0	0	0	0	0	0	0	0	0	0
MCFLCFRHSFLCC	0	0	0	7	57	15	0	0	0	0	0	0	0	0	0	0
MCFRCFLASFWIC	0	0	2	3	48	15	0	0	0	0	0	0	0	0	0	0
MCFRCFLASFWSC	0	3	1	32	56	15	0	0	0	0	0	0	0	0	0	0
MCFRCFLDSFWCC	0	0	2	4	30	15	0	0	0	0	0	0	0	0	0	0
MCFRFPTRCPLFWCC	0	0	0	2	24	15	0	0	0	0	0	0	0	0	0	0
MCFRRFLASFWCC	0	1	3	17	58	15	0	0	0	0	0	0	0	0	0	0
MCFRWRLFHYLTPFC	0	0	1	1	14	15	0	0	0	0	0	0	0	0	0	0
MCFRWRLIHHLTPNC	0	0	1	0	9	15	0	0	0	0	0	0	0	0	0	0
MCFVCFRHSYLCC	0	0	1	10	65	15	0	0	0	0	0	0	0	0	0	0
MCFVSFRHSFLCC	0	2	1	10	57	15	0	0	0	0	0	0	0	0	0	0
MCFVYPRRQPLYRLC	0	0	0	1	9	15	0	0	0	0	0	0	0	0	0	0
MCHICFSGLFYCC	0	0	0	4	42	15	0	0	0	0	0	0	0	0	0	0
MCHLCFSRLFWCC	0	0	0	0	11	15	0	0	0	0	0	0	0	0	0	0
MCIRWPARQSLVWLC	0	0	0	5	27	15	0	0	0	0	0	0	0	0	0	0
MCIRWPARRSLFWCC	0	1	0	0	23	15	0	0	0	0	0	0	0	0	0	0
MCIVCFRHSFWCC	0	0	0	0	8	15	0	0	0	0	0	0	0	0	0	0
MCIYRLSDCWVVC	0	0	0	2	16	15	0	0	0	0	0	0	0	0	0	0
MCIYRLSDFWLVC	0	0	0	2	27	15	0	0	0	0	0	0	0	0	0	0
MCIYRLSDFWYYAC	0	0	0	0	36	15	0	0	0	0	0	0	0	0	0	0
MCIYRLWDFWVVC	0	0	0	4	31	15	0	0	0	0	0	0	0	0	0	0
MCLRWPARQSLFWLC	0	0	1	8	20	15	0	0	0	0	0	0	0	0	0	0
MCLVYPRRQPLYWVC	0	0	0	1	15	15	0	0	0	0	0	0	0	0	0	0
MCNKFPWPFPIFWAC	0	0	1	9	29	15	0	0	0	0	0	0	0	0	0	0
MCRLCFCSSFWCC	0	0	2	82	71	15	0	0	0	0	0	0	0	0	0	0
MCRLCFRHSFWCC	0	0	0	0	3	15	0	0	0	0	0	0	0	0	0	0
MCRLCFSKLFGCC	0	1	0	4	20	15	0	0	0	0	0	0	0	0	0	0
MCRLCFSKLYWCS	0	0	0	0	6	15	0	0	0	0	0	0	0	0	0	0
MCRLCFSRLFWAC	0	0	0	1	19	15	0	0	0	0	0	0	0	0	0	0
MCSNMWKLANRWGVC	0	0	0	1	6	15	0	0	0	0	0	0	0	0	0	0
MCSNMWKLAYRWWVC	0	0	0	2	19	15	0	0	0	0	0	0	0	0	0	0
MCSNMWNLANRWWAC	0	0	0	7	46	15	0	0	0	0	0	0	0	0	0	0
MCSVYPRRQPLYWLC	0	0	0	0	11	15	0	0	0	0	0	0	0	0	0	0
MCTKFPWPFPIFWSC	0	0	0	5	36	15	0	0	0	0	0	0	0	0	0	0
MCTRTSFYGFGYYAC	0	1	0	4	48	15	0	0	0	0	0	0	0	2	0	0
MCVCWPNLNALFWLC	0	1	2	16	42	15	0	0	0	0	0	0	0	0	0	0
MCVPCFPHTFLCC	0	0	5	49	71	15	0	0	0	0	0	0	0	0	0	0
MCVPCFSHTFLRC	0	0	3	62	97	15	0	0	0	0	0	0	0	0	0	0
MCVPCFSNTFLCC	0	0	0	6	8	15	0	0	0	0	0	0	0	0	0	0
MCVRWPNLNALFWQC	0	0	2	26	53	15	0	0	0	0	0	0	0	0	0	0
MCWYCFRKNFWCC	0	0	0	15	155	15	0	0	0	0	0	0	0	0	0	0
MCYKCPIRSHLYWLC	0	1	0	19	50	15	0	0	0	0	0	0	0	0	0	0
MCYRHPHSNPLLWVC	0	0	0	4	21	15	0	0	0	0	0	0	0	0	0	0
MCYRHPHSSPLFWVC	0	0	0	3	12	15	0	0	0	0	0	0	0	0	0	0
MCYRWRLFHQLTPYC	0	0	0	3	11	15	0	0	0	0	0	0	0	0	0	0
MCYRWRLIHHLTPYC	0	0	0	2	31	15	0	0	0	0	0	0	0	0	0	0
MRWYCFRKSFWCC	0	1	1	4	52	15	0	0	0	0	0	0	0	0	0	0
MSCYNLFSLFWAC	0	0	2	2	37	15	0	0	0	0	0	0	0	0	0	0
MCCARFVNLFWLC	0	0	0	14	67	14	0	0	0	0	0	0	0	0	0	0
MCCFKFRDLFCVC	0	0	1	8	48	14	0	0	0	0	0	0	0	0	0	0
MCCFRYRMSFWVC	0	0	0	6	53	14	0	0	0	0	0	0	0	0	0	0
MCCTPCYGLFLCC	0	0	0	2	19	14	0	0	0	0	0	0	0	0	0	0
MCCTRFVKLFWLC	0	0	0	6	32	14	0	0	0	0	0	0	0	0	0	0
MCCTRFVNHFWLC	0	0	0	6	31	14	0	0	0	0	0	0	0	0	0	0
MCCVRYLARFWIC	0	0	1	3	27	14	0	0	0	0	0	0	0	0	0	0
MCCYNLCSLFWAC	0	0	0	5	36	14	0	0	0	0	0	0	0	0	0	0
MCCYNLFSLYWVC	0	0	0	0	42	14	0	0	0	0	0	0	0	0	0	0
MCCYRCYRLFYCC	0	0	1	8	40	14	0	0	0	0	0	0	0	0	0	0
MCFIYPRRQPLYWLC	0	0	0	0	14	14	0	0	0	0	0	0	0	0	0	0
MCFRCFLASFWVVC	0	1	0	2	62	14	0	0	0	0	0	0	0	0	0	0
MCFRWRLFHHLTHFC	0	0	1	1	18	14	0	0	0	0	0	0	0	0	0	0
MCFRWRLFHHLTPFS	0	0	0	1	18	14	0	0	0	0	0	0	0	0	0	0
MCFRWRLFHHLTPYCSC	0	0	0	1	15	14	0	0	0	0	0	0	0	0	0	0
MCFRWRQFHHLTPFC	0	0	0	1	10	14	0	0	0	0	0	0	0	0	0	0
MCFVCFRHPFWCC	0	0	0	1	9	14	0	0	0	0	0	0	0	0	0	0
MCFVCFRHSFWAC	0	1	0	0	18	14	0	0	0	0	0	0	0	0	0	0
MCFVCFRHSLWCC	0	0	0	0	8	14	0	0	0	0	0	0	0	0	0	0
MCFVCFRNSFLCC	0	1	0	5	48	14	0	0	0	0	0	0	0	0	0	0
MCGQSWVLYELWRVC	0	0	6	19	72	14	0	0	0	0	0	0	0	0	0	0
MCIGKWYTYQHWTRC	0	0	2	13	65	14	0	0	0	0	0	0	0	0	0	0
MCIRWPALQSLFWLC	0	0	0	4	31	14	0	0	0	0	0	0	0	0	0	0
MCIRWPARRPLFWIC	0	0	0	0	6	14	0	0	0	0	0	0	0	0	0	0
MCLPCFCHLFLCC	0	0	0	8	36	14	0	0	0	0	0	0	0	0	0	0
MCLPCFHRTYICC	0	2	51	243	173	14	0	0	0	0	0	0	0	0	0	0
MCPNMWKLANRWCC	0	0	0	0	12	14	0	0	0	0	0	0	0	0	0	0
MCRKCFSKLFWCC	0	0	1	1	8	14	0	0	0	0	0	0	0	0	0	0
MCRLCFGKLFWLC	0	0	0	1	29	14	0	0	0	0	0	0	0	0	0	0
MCRLCFGKLFWYC	0	0	0	2	13	14	0	0	0	0	0	0	0	0	0	0
MCRLCFNKLFWWC	0	1	0	3	23	14	0	0	0	0	0	0	0	0	0	0
MCRLCFSKLFLLC	0	0	0	1	27	14	0	0	0	0	0	0	0	0	0	0
MCSLCFSKLFCCC	0	0	0	0	7	14	0	0	0	0	0	0	0	0	0	0
MCSYGSWYGYSYLVC	0	0	2	9	70	14	0	0	0	0	0	0	0	0	0	0
MCTKFLWPFPIFWAC	0	0	1	10	18	14	0	0	0	0	0	0	0	0	0	0
MCTKFPWPFHIFWAC	0	0	0	7	33	14	0	0	0	0	0	0	0	0	0	0
MCTMFPWPFPIFWAC	0	1	0	8	28	14	0	0	0	0	0	0	0	0	0	0
MCVPCFSHTFLC	0	0	3	19	52	14	0	0	0	0	0	0	0	0	0	0
MCVPCFSHTFMCC	0	0	1	9	40	14	0	0	0	0	0	0	0	0	0	0
MCVPCFSHTFPCC	0	1	1	50	60	14	0	0	0	0	0	0	0	0	0	0
MCVPYPRARPLYWLC	0	0	1	5	37	14	0	0	0	0	0	0	0	0	0	0
MCVRCPNLNALFWLC	0	0	0	7	28	14	0	0	0	0	0	0	0	0	0	0
MCVRWPNLNALFLLC	0	0	0	10	46	14	0	0	0	0	0	0	0	0	0	0
MCVRWPNLNSLFWLC	0	0	1	6	39	14	0	0	0	0	0	0	0	0	0	0
MCVRWPNWNALFWLC	0	0	1	2	18	14	0	0	0	0	0	0	0	0	0	0
MCVSCFSHTFLCC	0	0	0	10	41	14	0	0	0	0	0	0	0	0	0	0
MCVVYPRRQPLYWIC	0	0	1	4	39	14	0	0	0	0	0	0	0	0	0	0
MCWNCFRKSFWCC	0	0	1	15	54	14	0	0	0	0	0	0	0	0	0	0
MCWYCFLKSFWCC	0	0	0	6	43	14	0	0	0	0	0	0	0	0	0	0
MCWYCFRKSIWCC	0	0	0	12	48	14	0	0	0	0	0	0	0	0	0	0
MCYKWPIRAHLYWLC	0	0	0	4	33	14	0	0	0	0	0	0	0	0	0	0
MCYKWPIRSRLYWLC	0	1	2	21	64	14	0	0	0	0	0	0	0	0	0	0
MCYRFPSPRHLFWAC	0	0	1	24	49	14	0	0	0	0	0	0	0	0	0	0
MCYRWRLFHHMTPYC	0	0	0	0	10	14	0	0	0	0	0	0	0	0	0	0
MCYVCFSDSFICC	0	0	0	2	16	14	0	0	0	0	0	0	0	0	0	0
MRFRWRLFHHLTPFC	0	0	0	0	14	14	0	0	0	0	0	0	0	0	0	0
MRIRWPARQPLFWLC	0	0	0	0	2	14	0	0	0	0	0	0	0	0	0	0
MSCTRFVNLFWLC	0	0	0	2	11	14	0	0	0	0	0	0	0	0	0	0
MYCYRCWSLFWCC	0	0	0	1	23	14	0	0	0	0	0	0	0	0	0	0
MYWYCFRKSFWCC	0	1	1	3	41	14	0	0	0	0	0	0	0	0	0	0
MYYKWPIRSHLYWLC	0	0	1	2	43	14	0	0	0	0	0	0	0	0	0	0
MCAKFPWPFPIFWCC	0	0	0	1	34	13	0	0	0	0	0	0	0	0	0	0
MCCFKFRDLFWVF	0	2	0	5	45	13	0	0	0	0	0	0	0	0	0	0
MCCLCFNKLFWCC	0	0	0	0	10	13	0	0	0	0	0	0	0	0	0	0
MCCNNLFSLFWAC	0	1	1	4	32	13	0	0	0	0	0	0	0	0	0	0
MCCTLCFECFYCC	0	2	76	270	206	13	0	0	0	0	0	0	0	6	0	0
MCCTRFVNLFWFC	0	0	7	23	43	13	0	0	0	0	0	0	0	0	0	0
MCFHCFASRFWWC	0	0	5	35	88	13	0	0	0	0	0	0	0	0	0	0
MCFPCFRFTFLCC	0	0	0	11	32	13	0	0	0	0	0	0	0	0	0	0
MCFRCFLASFRCC	0	2	1	34	91	13	0	0	0	0	0	0	0	0	0	0
MCFRWRLFHHVTPYC	0	0	0	3	29	13	0	0	0	0	0	0	0	0	0	0
MCFVCFSHSFLCC	0	0	1	12	55	13	0	0	0	0	0	0	0	0	0	0
MCFVYPRGQPLYWIC	0	0	1	1	24	13	0	0	0	0	0	0	0	0	0	0
MCFVYPRRHPFYWIC	0	0	1	0	9	13	0	0	0	0	0	0	0	0	0	0
MCFVYPRRQPLYRVC	0	0	0	1	13	13	0	0	0	0	0	0	0	0	0	0
MCFVYPRRQPLYYAC	0	1	0	0	52	13	0	0	0	0	0	0	0	0	0	0
MCIGKWCTYQYWTRC	0	0	1	11	53	13	0	0	0	0	0	0	0	0	0	0
MCIGKWYTYQYWTRS	0	0	4	10	52	13	0	0	0	0	0	0	0	0	0	0
MCILHGLIYWAPNQC	0	1	2	2	28	13	0	0	0	0	0	0	0	0	0	0
MCIRWLNRYWLC	0	0	0	12	55	13	0	0	0	0	0	0	0	0	0	0
MCIRWPAGQSLFWLC	0	0	0	1	20	13	0	0	0	0	0	0	0	0	0	0
MCIRWPARQPLFWFC	0	0	0	1	17	13	0	0	0	0	0	0	0	0	0	0
MCIYPLSDFWVVC	0	0	0	5	25	13	0	0	0	0	0	0	0	0	0	0
MCIYRLSDFWVDC	0	0	0	2	25	13	0	0	0	0	0	0	0	0	0	4
MCLLWTRHFDGYWVC	0	0	1	19	45	13	0	0	0	0	0	0	0	0	0	0
MCLLWTRHFDRYWVY	0	0	2	7	42	13	0	0	0	0	0	0	0	0	0	0
MCRFCFSKLFCCC	0	0	0	1	11	13	0	0	0	0	0	0	0	0	0	0
MCRLCFNKHFWCC	0	0	0	0	3	13	0	0	0	0	0	0	0	0	0	0
MCRLCFNKLFWLC	0	0	0	1	25	13	0	0	0	0	0	0	0	0	0	0
MCRLCFSKLCWCC	0	0	1	6	27	13	0	0	0	0	0	0	0	0	0	0
MCRLCFSNLFCCC	0	0	0	1	20	13	0	0	0	0	0	0	0	0	0	0
MCRLCFSNLFWLC	0	0	0	1	21	13	0	0	0	0	0	0	0	0	0	0
MCRLCFSRFFWCC	0	0	0	1	11	13	0	0	0	0	0	0	0	0	0	0
MCSNMSKLANRWWVC	0	0	0	0	12	13	0	0	0	0	0	0	0	0	0	0
MCSNMWKLADRWWIC	0	0	0	0	4	13	0	0	0	0	0	0	0	0	0	0
MCSNMWKLANRWSAC	0	0	0	6	38	13	0	0	0	0	0	0	0	0	0	0
MCSRWPARQSLFWLC	0	0	1	7	20	13	0	0	0	0	0	0	0	0	0	0
MCSTMWKLANRWWAC	0	0	0	0	23	13	0	0	0	0	0	0	0	0	0	0
MCSVCFRHSFWCC	0	0	0	0	14	13	0	0	0	0	0	0	0	0	0	0
MCTKFHWPFPIFWAC	0	0	0	7	27	13	0	0	0	0	0	0	0	0	0	0
MCTKFPWPFLIFWAC	0	0	1	7	35	13	0	0	0	0	0	0	0	0	0	0
MCTKFPWPFPIFWAR	0	0	0	7	31	13	0	0	0	0	0	0	0	0	0	0
MCTKFPWPFPIFWYC	0	2	0	0	8	13	0	0	0	0	0	0	0	0	0	0
MCTKFPWPVPIFWAC	0	0	0	16	40	13	0	0	0	0	0	0	0	0	0	0
MCTKFTWPFPIFWAC	0	0	0	4	30	13	0	0	0	0	0	0	0	0	0	0
MCTRTSFYGFWFYAC	0	0	1	7	45	13	0	0	0	0	0	0	0	0	0	0
MCVPCFSHTFLCY	0	0	2	14	18	13	0	0	0	0	0	0	0	0	0	0
MCVPCFSQTFLCC	0	0	0	14	26	13	0	0	0	0	0	0	0	0	0	0
MCVRWTNLNALFWLC	0	0	0	4	18	13	0	0	0	0	0	0	0	0	0	0
MCVVCFRHSFLCC	0	0	0	1	20	13	0	0	0	0	0	0	0	0	0	0
MCWVCFCSQFICC	0	0	0	13	60	13	0	0	0	0	0	0	0	0	0	0
MCWYCFRKSFWFC	0	0	1	21	57	13	0	0	0	0	0	0	0	0	0	0
MCWYCFRMSFWCC	0	0	0	7	45	13	0	0	0	0	0	0	0	0	0	0
MCYKWPIRSHLFWIC	0	1	0	0	9	13	0	0	0	0	0	0	0	0	0	0
MCYPHPHSNPLFWAC	0	0	0	5	14	13	0	0	0	0	0	0	0	0	0	0
MCYRHPHNNPLFWCC	0	0	0	0	7	13	0	0	0	0	0	0	0	0	0	0
MCYRNPHSNPLFWAC	0	0	0	2	22	13	0	0	0	0	0	0	0	0	0	0
MCYTLVPVYDYGWCC	0	1	74	227	252	13	0	0	0	0	0	0	0	0	0	0
MFSNMWKLANRWWVC	0	1	0	0	12	13	0	0	0	0	0	0	0	0	0	0
MFVRWPNLNALFWLC	0	0	0	5	12	13	0	0	0	0	0	0	0	0	0	0
MYVRWPNLNALFWLC	0	0	1	5	15	13	0	0	0	0	0	0	0	0	0	0
MCAFWCFHYIPDC	0	1	47	152	154	12	0	0	0	0	0	0	0	0	0	0
MCAKFPWPFPIFWLC	0	0	0	1	8	12	0	0	0	0	0	0	0	0	0	0
MCANMWKLANRWWVC	0	0	0	0	5	12	0	0	0	0	0	0	0	2	0	0
MCCFKFRNLFWIC	0	0	0	0	9	12	0	0	0	0	0	0	0	0	0	0
MCCIKFRDLFWIC	0	0	1	4	18	12	0	0	0	0	0	0	0	0	0	0
MCCLCFSKLFWLC	0	0	0	0	12	12	0	0	0	0	0	0	0	0	0	0
MCCTRFVKLFWCC	0	1	1	1	45	12	0	0	0	0	0	0	0	0	0	0
MCCVRYLARFWAC	0	1	0	0	43	12	0	0	0	0	0	0	0	0	0	0
MCCVRYLARLWLC	0	1	2	16	68	12	0	0	0	0	0	0	0	0	0	0
MCFAYPRRQPLFWIC	0	0	0	0	7	12	0	0	0	0	0	0	0	0	0	0
MCFRCFLASFWC	0	1	2	14	52	12	0	0	0	0	0	0	0	0	0	0
MCFRCFLSSFWCC	0	1	1	9	20	12	0	0	0	0	0	0	0	0	0	0
MCFRCRLFHHLTPFC	0	0	0	0	6	12	0	0	0	0	0	0	0	0	0	0
MCFRWRLFHHLAPCC	0	0	0	0	18	12	0	0	0	0	0	0	0	0	0	0
MCFRWRLFHHLTPDC	0	0	1	9	30	12	0	0	0	0	0	0	0	0	0	0
MCFRWRLFHRLTPFC	0	0	0	3	19	12	0	0	0	0	0	0	0	0	0	0
MCFRWRLFNHLTPCC	0	0	0	0	16	12	0	0	0	0	0	0	0	0	0	0
MCFRWRLNHHLTPYC	0	0	0	1	24	12	0	0	0	0	0	0	0	0	0	0
MCFRWRLVHHLTPFC	0	0	0	2	15	12	0	0	0	0	0	0	0	0	0	0
MCFVCFRHSFLCS	0	0	0	9	49	12	0	0	0	0	0	0	0	0	0	0
MCFVCFRHSFYCC	0	0	0	1	36	12	0	0	0	0	0	0	0	0	0	0
MCFVCLRHSFWCC	0	0	0	0	13	12	0	0	0	0	0	0	0	0	0	0
MCFVWFRHSFLCC	0	0	0	2	33	12	0	0	0	0	0	0	0	0	0	0
MCFVYPGRQPLYWIC	0	0	1	5	14	12	0	0	0	0	0	0	0	0	0	0
MCFVYPRRQPLDWIC	0	1	0	1	21	12	0	0	0	0	0	0	0	0	0	0
MCFVYPRRQPLYWVVC	0	0	0	0	17	12	0	0	0	0	0	0	0	0	0	0
MCHVCFEHRFLCC	0	0	0	6	22	12	0	0	0	0	0	0	0	0	0	0
MCICWPARQPLFWLC	0	0	0	1	3	12	0	0	0	0	0	0	0	0	0	0
MCIGKWHTYQYWTRC	0	1	0	21	68	12	0	0	0	0	0	0	0	0	0	0
MCIGKWYTYQYCTRC	0	0	1	9	57	12	0	0	0	0	0	0	0	0	0	0
MCIGKWYTYQYWTWC	0	0	0	1	21	12	0	0	0	0	0	0	0	0	0	0
MCIRWPARLPLFWLC	0	0	0	0	14	12	0	0	0	0	0	0	0	0	0	0
MCIRWPARQSLYWVC	0	0	0	1	13	12	0	0	0	0	0	0	0	0	0	0
MCIYRLSDVWVVC	0	0	0	1	10	12	0	0	0	0	0	0	0	0	0	0
MCIYRLSVFWVVC	0	0	0	2	26	12	0	0	0	0	0	0	0	0	0	0
MCLFWTRHFDRYWVC	0	0	0	1	25	12	0	0	0	0	0	0	0	0	0	0
MCLHCFASRFWCC	0	0	3	15	36	12	0	0	0	0	0	0	0	0	0	0
MCLLWKRHFDRYWVC	0	0	0	2	30	12	0	0	0	0	0	0	0	0	0	0
MCMKCFRHRYWCC	0	0	2	4	65	12	0	0	0	0	0	0	0	0	0	0
MCRLCFRRLFWCC	0	0	0	0	11	12	0	0	0	0	0	0	0	0	0	0
MCRLCFSKLFLCF	0	0	0	3	12	12	0	0	0	0	0	0	0	0	0	0
MCRLWTRHFDRYWVC	0	0	1	1	22	12	0	0	0	0	0	0	0	0	0	0
MCRRTSFYGFWYYAC	0	1	0	3	27	12	0	0	0	0	0	0	0	0	0	0
MCSNMWKLAHRWWVC	0	0	0	0	11	12	0	0	0	0	0	0	0	0	0	0
MCSNMWKLANRWGAC	0	1	0	4	31	12	0	0	0	0	0	0	0	0	0	0
MCSNMWKLANRWWMC	0	1	0	1	15	12	0	0	0	0	0	0	0	0	0	0
MCSNMWMLANRWWVC	0	0	1	1	22	12	0	0	0	0	0	0	0	0	0	0
MCSNRWKLANRWWVC	0	0	0	0	14	12	0	0	0	0	0	0	0	0	0	0
MCSQSWVLYELWRIC	0	1	0	0	17	12	0	0	0	0	0	0	0	0	0	0
MCSYGSWYGYSYFAC	0	0	2	13	63	12	0	0	0	0	0	0	0	0	0	0
MCTKFPWPLPIFWCC	0	0	0	0	16	12	0	0	0	0	0	0	0	0	0	0
MCTRTSFYGFRYYVC	0	0	0	0	28	12	0	0	0	0	0	0	0	0	0	0
MCTRTSFYGFSYYAC	0	1	0	7	44	12	0	0	0	0	0	0	0	0	0	0
MCTRTSFYGFWLC	0	0	0	1	32	12	0	0	0	0	0	0	0	0	0	0
MCTRTTFYGFWYYAC	0	1	2	5	35	12	0	0	0	0	0	0	0	0	0	0
MCTRWPARQSLFWIC	0	0	0	0	10	12	0	0	0	0	0	0	0	0	0	0
MCVLWPNLNALFWLC	0	1	0	7	12	12	0	0	0	0	0	0	0	0	0	0
MCVPCFSHSFLCC	0	0	1	10	29	12	0	0	0	0	0	0	0	0	0	0
MCVPCFSHTFWCC	0	0	1	0	17	12	0	0	0	0	0	0	0	0	0	0
MCVRWLNLNALFWLC	0	0	0	7	30	12	0	0	0	0	0	0	0	0	0	0
MCVRWPILNALFWLC	0	0	0	8	17	12	0	0	0	0	0	0	0	0	0	0
MCWNMWKLANRWWVC	0	0	0	0	16	12	0	0	0	0	0	0	0	0	0	0
MCWYCFSKLFWCC	0	2	0	2	47	12	0	0	0	0	0	0	0	0	0	0
MCYKCLTGLFLCC	0	0	1	17	33	12	0	0	0	0	0	0	0	0	0	0
MCYKWLIRSHLYWLC	0	0	1	7	38	12	0	0	0	0	0	0	0	0	0	0
MCYKWPIRSHLYWLF	0	0	0	4	34	12	0	0	0	0	0	0	0	0	0	0
MCYRCFTGLFLCC	0	0	2	13	31	12	0	0	0	0	0	0	0	0	0	0
MCYRFPSSKHLFWAC	0	0	1	11	51	12	0	0	0	0	0	0	0	0	0	0
MCYRHPHINPLFWAC	0	0	0	4	13	12	0	0	0	0	0	0	0	0	0	0
MCYRHPHNNPLFWLC	0	0	0	0	5	12	0	0	0	0	0	0	0	0	0	0
MCYRHPHTNPLFWAC	0	1	0	3	19	12	0	0	0	0	0	0	0	0	0	0
MCYRHPRSNPLFWCC	0	0	0	0	3	12	0	0	0	0	0	0	0	0	0	0
MCYRQPHSNPLFWAC	0	0	0	8	29	12	0	0	0	0	0	0	0	0	0	0
MCYVCFSQSLICC	0	0	0	3	10	12	0	0	0	0	0	0	0	0	0	0
MCYVYPRRQPLYRIC	0	0	0	0	11	12	0	0	0	0	0	0	0	0	0	0
MFTKFPWPFPIFWAC	0	1	0	7	22	12	0	0	0	0	0	0	0	0	0	0
MFYVCFSHSFICC	0	0	0	5	20	12	0	0	0	0	0	0	0	0	0	0
MRIGKWYTYQYWTRC	0	0	1	6	28	12	0	0	0	0	0	0	0	0	0	0
MCCFKFRDLFWVY	0	0	1	4	21	11	0	0	0	0	0	0	0	0	0	0
MCCTPCYGLFHWC	0	0	0	6	41	11	0	0	0	0	0	0	0	0	0	0
MCCTRCFSLFWCC	0	0	0	0	16	11	0	0	0	0	0	0	0	0	0	0
MCCTSFVNLFWLC	0	0	0	6	33	11	0	0	0	0	0	0	0	0	0	0
MCCYRCWSLFSCC	0	0	0	2	13	11	0	0	0	0	0	0	0	0	0	0
MCFHCFASRFWAC	0	0	0	3	42	11	0	0	0	0	0	0	0	0	0	0
MCFRCFLAPFWCC	0	1	6	22	54	11	0	0	0	0	0	0	0	0	0	0
MCFRWRLFHHLKPFC	0	0	1	1	6	11	0	0	0	0	0	0	0	0	0	0
MCFRWRLFPHLTPYC	0	0	1	1	17	11	0	0	0	0	0	0	0	0	0	0
MCFSCFSKLFWCC	0	0	0	4	24	11	0	0	0	0	0	0	0	0	0	0
MCFSCFSRQFWCC	0	1	1	8	61	11	0	0	0	0	0	0	0	0	0	0
MCFVCFRHSILCC	0	1	0	11	37	11	0	0	0	0	0	0	0	0	0	0
MCFVCFWHSFLCC	0	0	1	4	52	11	0	0	0	0	0	0	0	0	0	0
MCFVYPRRQPLYWYC	0	0	0	0	10	11	0	0	0	0	0	0	0	0	0	0
MCFVYPRRQPMNWIC	0	0	0	0	5	11	0	0	0	0	0	0	0	0	0	0
MCIGKWYAYQYWTRC	0	0	1	4	58	11	0	0	0	0	0	0	0	0	0	0
MCIGKWYTHQYWTRC	0	0	3	18	82	11	0	0	0	0	0	0	0	0	0	0
MCIGKWYTYRYWTCC	0	0	0	0	14	11	0	0	0	0	0	0	0	0	0	0
MCIRSPARQSLFWLC	0	0	0	3	9	11	0	0	0	0	0	0	0	0	0	0
MCIRWPARQSLLWIC	0	0	0	1	12	11	0	0	0	0	0	0	0	0	0	0
MCIRWPARQSVFWLC	0	0	0	2	14	11	0	0	0	0	0	0	0	0	0	0
MCIRWPGRQSLFWLC	0	0	0	4	10	11	0	0	0	0	0	0	0	0	0	0
MCLLWTRHFDRFWLC	0	0	0	0	29	11	0	0	0	0	0	0	0	0	0	0
MCPNMWRLANRWWAC	0	0	0	2	15	11	0	0	0	0	0	0	0	0	0	0
MCPYPTLYLSMFWLC	0	0	1	7	28	11	0	0	0	0	0	0	0	0	0	0
MCQNMWKLANRWWAC	0	1	0	0	10	11	0	0	0	0	0	0	0	0	0	0
MCRFCFIKLFWCC	0	0	0	4	5	11	0	0	0	0	0	0	0	0	0	0
MCRHCFRKSFWCC	0	1	0	1	21	11	0	0	0	0	0	0	0	0	0	0
MCRLCFGKLFWWC	0	0	0	2	18	11	0	0	0	0	0	0	0	0	0	0
MCRLCFIKLFLCC	0	0	0	3	12	11	0	0	0	0	0	0	0	0	0	0
MCRLCFSNLFLCC	0	0	0	0	11	11	0	0	0	0	0	0	0	0	0	0
MCRLCFSRLFRCC	0	0	1	3	12	11	0	0	0	0	0	0	0	0	0	0
MCRLCLRKLFWCC	0	0	0	0	6	11	0	0	0	0	0	0	0	0	0	0
MCRLFDLFWLLKPQC	0	0	3	48	75	11	0	0	0	0	0	0	0	0	0	0
MCRPYPRFQSLFLLC	0	2	52	178	192	11	0	0	0	0	0	0	0	0	0	0
MCRRWPSREALYWCC	0	0	0	1	71	11	0	0	0	0	0	0	0	0	0	0
MCSKFPWPFPIFWVC	0	0	1	3	12	11	0	0	0	0	0	0	0	0	0	0
MCSLCFSKLFLCC	0	0	0	2	11	11	0	0	0	0	0	0	0	0	0	0
MCSNMWKLANRFWCC	0	1	0	0	13	11	0	0	0	0	0	0	0	0	0	0
MCSNMWKLANRWLAC	0	1	0	5	28	11	0	0	0	0	0	0	0	0	0	0
MCSNMWKLANRWWVR	0	0	0	1	11	11	0	0	0	0	0	0	0	0	0	0
MCSNMWKLGNRWWVC	0	0	0	0	4	11	0	0	0	0	0	0	0	0	0	0
MCTKFPWPLPIFWLC	0	1	0	1	6	11	0	0	0	0	0	0	0	0	0	0
MCTKLPWPFPIFWVC	0	0	0	4	11	11	0	0	0	0	0	0	0	0	0	0
MCTNFPWPFPIFWAC	0	0	0	2	17	11	0	0	0	0	0	0	0	0	0	0
MCVPCFSHAFLCC	0	0	1	20	29	11	0	0	0	0	0	0	0	0	0	0
MCVRCFDQLFWYC	0	0	1	10	33	11	0	0	0	0	0	0	0	0	0	0
MCVRWPARQSLFWPC	0	0	0	13	21	11	0	0	0	0	0	0	0	0	0	0
MCVRWSNLNALFWLC	0	0	2	13	34	11	0	0	0	0	0	0	0	0	0	0
MCWFCFRKSFWCC	0	0	1	8	54	11	0	0	0	0	0	0	0	0	0	0
MCWNMWKLANRWWAC	0	0	1	4	49	11	0	0	0	0	0	0	0	0	0	0
MCWYCYRKSFWCC	0	1	0	10	50	11	0	0	0	0	0	0	0	0	0	0
MCYKWHIRSHLYWLC	0	0	0	6	34	11	0	0	0	0	0	0	0	0	0	0
MCYKWPIRSHLYLLC	0	0	1	6	52	11	0	0	0	0	0	0	0	0	0	0
MCYKWPIRSPLYWVC	0	0	0	0	1	11	0	0	0	0	0	0	0	0	0	0
MCYRFPSSRHPFWAC	0	1	4	47	84	11	0	0	0	0	0	0	0	0	0	0
MCYRHPHSNPLFWAR	0	0	0	5	18	11	0	0	0	0	0	0	0	0	0	0
MCYRHPHSNPLFWPC	0	0	0	16	19	11	0	0	0	0	0	0	0	0	0	0
MCYRHPHSNPLFWSC	0	1	1	7	25	11	0	0	0	0	0	0	0	0	0	0
MCYRHPHSNPQIWAC	0	0	0	2	7	11	0	0	0	0	0	0	0	0	0	0
MCYVCFEHRFLYC	0	0	2	7	54	11	0	0	0	0	0	0	0	0	0	0
MCYVYPRRQPMYWIC	0	1	0	5	17	11	0	0	0	0	0	0	0	0	0	0
MFYRHPHSNPLFWAC	0	0	0	0	18	11	0	0	0	0	0	0	0	0	0	0
MGIYRLSDFWVVC	0	0	0	1	6	11	0	0	0	0	0	0	0	0	0	0
MRCTRFVNLFWLC	0	0	0	2	23	11	0	0	0	0	0	0	0	0	0	0
MSWYCFRKSFWCC	0	0	0	5	32	11	0	0	0	0	0	0	0	0	0	0
MSYKWPIRSHLYWLC	0	0	0	8	29	11	0	0	0	0	0	0	0	0	0	0
MCCFKFRDFFWLC	0	0	0	0	9	10	0	0	0	0	0	0	0	0	0	0
MCCFKFRNLFWAC	0	0	0	0	12	10	0	0	0	0	0	0	0	0	0	0
MCCFKLRDLFWVVC	0	0	0	0	7	10	0	0	0	0	0	0	0	0	0	0
MCCFRFRDLFWCC	0	0	0	0	14	10	0	0	0	0	0	0	0	0	0	0
MCCLCFSKLFWWC	0	0	0	1	15	10	0	0	0	0	0	0	0	0	0	0
MCCSKFRDLFWIC	0	0	0	1	7	10	0	0	0	0	0	0	0	0	0	0
MCCTPCYGLFHYC	0	0	0	3	33	10	0	0	0	0	0	0	0	0	0	0
MCCTRFVNLFWLY	0	0	0	7	37	10	0	0	0	0	0	0	0	0	0	0
MCCTRFVYLFWLC	0	0	2	14	29	10	0	0	0	0	0	0	0	0	0	0
MCCYLCWSLFWCC	0	0	0	0	11	10	0	0	0	0	0	0	0	0	0	0
MCCYNLFSLFLAC	0	0	1	7	34	10	0	0	0	0	0	0	0	0	0	0
MCCYNLFSLVWAC	0	0	0	1	18	10	0	0	0	0	0	0	0	0	0	0
MCFAYPRRQPLYWCC	0	0	0	1	14	10	0	0	0	0	0	0	0	0	0	0
MCFHCFASRLWCC	0	0	0	12	33	10	0	0	0	0	0	0	0	0	0	0
MCFMCFRHSFWCC	0	0	0	0	2	10	0	0	0	0	0	0	0	0	0	0
MCFRCFFASFWCC	0	0	0	5	17	10	0	0	0	0	0	0	0	0	0	0
MCFRCFLASSWCC	0	0	2	37	65	10	0	0	0	0	0	0	0	0	0	0
MCFRLRLFHHLTPYC	0	0	0	3	32	10	0	0	0	0	0	0	0	0	0	0
MCFRWRLCHHLTPFC	0	0	0	1	13	10	0	0	0	0	0	0	0	8	0	12
MCFRWRLFHHLPPFC	0	0	0	1	8	10	0	0	0	0	0	0	0	0	0	0
MCFRWRLFHHLTPYYGC	0	0	0	1	4	10	0	0	0	0	0	0	0	0	0	0
MCFRWRLFHPLTPYC	0	0	0	0	9	10	0	0	0	0	0	0	0	0	0	0
MCFRWRLSHHLTPCC	0	0	0	2	31	10	0	0	0	0	0	0	0	0	0	0
MCFRWRQIHHLTPYC	0	0	0	1	10	10	0	0	0	0	0	0	0	0	0	0
MCFSCFCHTFYYC	0	0	1	12	56	10	0	0	0	0	0	0	0	0	0	0
MCFTWRLFHHLTPYC	0	0	0	2	26	10	0	0	0	0	0	0	0	0	0	0
MCFVCFRHSFCCC	0	0	0	1	3	10	0	0	0	0	0	0	0	0	0	0
MCFVCFRHSFWSC	0	0	0	0	6	10	0	0	0	0	0	0	0	0	0	0
MCFVCFRQSFLCC	0	0	0	7	53	10	0	0	0	0	0	0	0	0	0	0
MCFVCYRHSFLCC	0	0	0	6	50	10	0	0	0	0	0	0	0	0	0	0
MCFVRFRHSFWCC	0	1	0	0	5	10	0	0	0	0	0	0	0	0	0	0
MCFVYKRRQPLYWIC	0	0	0	2	17	10	0	0	0	0	0	0	0	0	0	0
MCFVYPRRQPLCWVC	0	0	0	0	4	10	0	0	0	0	0	0	0	0	0	0
MCFVYPRRQPLYWLS	0	0	0	0	4	10	0	0	0	0	0	0	0	0	0	0
MCFVYPRRQPLYWPC	0	0	0	2	6	10	0	0	0	0	0	0	0	0	0	0
MCFVYQRRQPLYWLC	0	0	0	0	8	10	0	0	0	0	0	0	0	0	0	0
MCHLCFRKLFWCC	0	0	0	0	6	10	0	0	0	0	0	0	0	0	0	0
MCHLCFSKLFWLC	0	1	0	1	11	10	0	0	0	0	0	0	0	0	0	0
MCIGKWYMYQYWTRC	0	1	1	5	49	10	0	0	0	0	0	0	0	0	0	0
MCIGKWYTYQCWTRC	0	0	2	13	38	10	0	0	0	0	0	0	0	0	0	0
MCILHGLIYWAPRQC	0	1	0	1	10	10	0	0	0	0	0	0	0	0	0	0
MCIRRPARQSLFWIC	0	0	1	1	6	10	0	0	0	0	0	0	0	0	0	0
MCIRWLARQPLFWLC	0	0	0	2	4	10	0	0	0	0	0	0	0	0	0	0
MCIRWPARQPLFWLS	0	0	1	0	8	10	0	0	0	0	0	0	0	0	0	0
MCIRWPARQPPFWLC	0	0	0	2	12	10	0	0	0	0	0	0	0	0	0	0
MCIRWPARQSLFWLF	0	0	0	5	17	10	0	0	0	0	0	0	0	0	0	0
MCIRWPARQSLFWSC	0	0	0	1	11	10	0	0	0	0	0	0	0	0	0	0
MCIRWPARQSLFWWC	0	0	0	0	4	10	0	0	0	0	0	0	0	0	0	0
MCLLHRLYWLVPC	0	1	4	19	46	10	0	0	0	0	0	0	0	0	0	0
MCLLWTRHFDRNWVC	0	0	0	7	32	10	0	0	0	0	0	0	0	0	0	0
MCLLWTRNFDRYWVC	0	0	0	1	13	10	0	0	0	0	0	0	0	0	0	0
MCLLWTSHFDRYWVC	0	1	0	5	23	10	0	0	0	0	0	0	0	0	0	0
MCMKCFRCRYWCC	0	0	1	13	55	10	0	0	0	0	0	0	0	0	0	0
MCNGKWYTYQYWTRC	0	0	1	8	52	10	0	0	0	0	0	0	0	0	0	0
MCNKWPIRSHLYWLC	0	1	0	6	31	10	0	0	0	0	0	0	0	0	0	0
MCPLWTRHFDRYWAC	0	1	0	2	29	10	0	0	0	0	0	0	0	0	0	0
MCPLWTRHFDRYWCC	0	0	0	0	11	10	0	0	0	0	0	0	0	0	0	0
MCRLCFRKLFWWC	0	0	0	3	9	10	0	0	0	0	0	0	0	0	0	0
MCRLCFRKLFWYC	0	1	0	0	6	10	0	0	0	0	0	0	0	0	0	0
MCRLCFSKHFCCC	0	0	1	2	16	10	0	0	0	0	0	0	0	0	0	0
MCRLCFSKIFCCC	0	0	1	1	13	10	0	0	0	0	0	0	0	0	0	0
MCRLCFSKLFSSC	0	0	0	0	8	10	0	0	0	0	0	0	0	0	0	0
MCRLCFSKLFWCCC	0	0	0	3	11	10	0	0	0	0	0	0	0	0	0	0
MCRLCFSKLYWSC	0	0	1	2	13	10	0	0	0	0	0	0	0	0	0	0
MCRLCFSRPFWCC	0	0	0	2	12	10	0	0	0	0	0	0	0	0	0	0
MCRLCFTKHFWCC	0	0	0	1	5	10	0	0	0	0	0	0	0	0	0	0
MCRMSFSKLFWCC	0	0	0	1	7	10	0	0	0	0	0	0	0	0	0	0
MCRRWPSREALYWVC	0	0	0	6	35	10	0	0	0	0	0	0	0	0	0	0
MCSNMWKLANRWLVC	0	0	0	0	4	10	0	0	0	0	0	0	0	0	0	0
MCSNMWKLAYRWWAC	0	0	1	3	39	10	0	0	0	0	0	0	0	0	0	0
MCSQPWVLYELWRVC	0	0	2	6	28	10	0	0	0	0	0	0	0	0	0	0
MCSQSWVLYELWWVC	0	0	0	5	20	10	0	0	0	0	0	0	0	0	0	0
MCTAIWLCGFLAPFC	0	0	0	5	22	10	0	0	0	0	0	0	0	0	0	0
MCTKFPWPCPIFWAC	0	0	0	2	21	10	0	0	0	0	0	0	0	0	0	0
MCTKFPWPFPIFWMC	0	0	0	1	22	10	0	0	0	0	0	0	0	0	0	0
MCTKFPWPFPIFWPC	0	0	0	15	29	10	0	0	0	0	0	0	0	0	0	0
MCTKFPWPFPLFWAC	0	1	1	1	9	10	0	0	0	0	0	0	0	0	0	0
MCTKFPWPFPLFWLC	0	0	0	0	13	10	0	0	0	0	0	0	0	0	0	0
MCTKSPWPFPIFWVC	0	0	0	5	8	10	0	0	0	0	0	0	0	0	0	0
MCTPTSFYGFWYYAC	0	0	0	2	35	10	0	0	0	0	0	0	0	0	0	0
MCTRRSFYGFWYYAC	0	0	0	1	29	10	0	0	0	0	0	0	0	0	0	0
MCTRTSFYGFWYYAR	0	0	0	9	45	10	0	0	0	0	0	0	0	0	0	0
MCTTIWLCGFLAPFC	0	0	45	144	182	10	0	0	0	0	0	0	0	0	0	0
MCVPCFSHTFLCS	0	0	0	10	18	10	0	0	0	0	0	0	0	0	0	0
MCVPCFSHTFQCC	0	1	1	10	23	10	0	0	0	0	0	0	0	0	0	0
MCVPCFSHTYLCC	0	0	0	8	28	10	0	0	0	0	0	0	0	0	0	0
MCVPRFSHTFLCC	0	2	1	34	61	10	0	0	0	0	0	0	0	0	0	0
MCVRLPNLNALFWLC	0	0	0	11	18	10	0	0	0	0	0	0	0	0	0	0
MCVRWLNKYWLC	0	0	0	11	54	10	0	0	0	0	0	0	0	0	0	0
MCVRWPNLNARFWLC	0	0	0	1	30	10	0	0	0	0	0	0	0	0	0	0
MCVRWPNLNVLFWLC	0	0	1	5	18	10	0	0	0	0	0	0	0	0	0	0
MCVRWPTLNALFWLC	0	0	1	2	6	10	0	0	0	0	0	0	0	0	0	0
MCVRWRYWPAWCC	0	0	0	2	43	10	0	0	0	0	0	0	0	0	0	0
MCVRWRYWPAWRC	0	0	2	23	88	10	0	0	0	0	0	0	0	0	0	0
MCYKWPIRSHLYWKC	0	0	1	2	16	10	0	0	0	0	0	0	0	0	0	0
MCYKWPIRSHLYWPC	0	0	1	3	25	10	0	0	0	0	0	0	0	0	0	0
MCYKWPIRSPLYWCC	0	1	0	0	6	10	0	0	0	0	0	0	0	0	0	0
MCYKWPTRSHLYWIC	0	1	0	0	17	10	0	0	0	0	0	0	0	0	0	0
MCYKWRLFHHLTPYC	0	0	0	3	13	10	0	0	0	0	0	0	0	0	0	0
MCYRFPSFRHLFWAC	0	1	0	8	26	10	0	0	0	0	0	0	0	0	0	0
MCYRHLHSNPLFWAC	0	0	0	5	21	10	0	0	0	0	0	0	0	0	0	0
MCYRHPHSHPLFWAC	0	0	0	2	13	10	0	0	0	0	0	0	0	0	0	0
MCYRHPHSNPLFGAC	0	0	1	6	14	10	0	0	0	0	0	0	0	0	0	0
MCYRHPHSNPLFWDC	0	0	0	2	11	10	0	0	0	0	0	0	0	0	0	0
MCYRHPHSNPLVWAC	0	0	1	8	14	10	0	0	0	0	0	0	0	0	0	0
MCYRHPYSNPLFWVC	0	0	0	0	5	10	0	0	0	0	0	0	0	0	0	0
MCYVCFRHTFLCC	0	0	0	1	8	10	0	0	0	0	0	0	0	0	0	0
MCYVCFSHSFFCC	0	0	1	8	33	10	0	0	0	0	0	0	0	0	0	0
MCYVYPRRHPLYWIC	0	0	1	1	9	10	0	0	0	0	0	0	0	0	0	0
MFCTRFVNLFWLC	0	0	0	5	10	10	0	0	0	0	0	0	0	0	0	0
MRCFKFRDLFWVC	0	0	0	5	17	10	0	0	0	0	0	0	0	0	0	0
MRFVCFRHSFLCC	0	1	0	9	40	10	0	0	0	0	0	0	0	0	0	0
MRTRTSFYGFWYYAC	0	0	0	2	60	10	0	0	0	0	0	0	0	0	0	0
MRVRWPNLNALFWLC	0	0	0	2	32	10	0	0	0	0	0	0	0	0	0	0
MCCFKFRDFFLVC	0	0	0	5	20	9	0	0	0	0	0	0	0	0	0	0
MCCFKFRDFFWCC	0	0	1	0	16	9	0	0	0	0	0	0	0	0	0	0
MCCFKFRDLFWVS	0	0	0	7	20	9	0	0	0	0	0	0	0	0	0	0
MCCFKLRDLFWLC	0	1	0	0	8	9	0	0	0	0	0	0	0	0	0	0
MCCTPCYGLLHCC	0	0	1	7	27	9	0	0	0	0	0	0	0	0	0	0
MCCVRYLARFRLC	0	0	2	20	25	9	0	0	0	0	0	0	0	0	0	0
MCCYNLFSLFWACGC	0	0	0	4	8	9	0	0	0	0	0	0	0	0	0	0
MCCYNLFSLFWPC	0	0	2	16	31	9	0	0	0	0	0	0	0	0	0	0
MCCYPCWSLFWCC	0	1	0	0	8	9	0	0	0	0	0	0	0	0	0	0
MCCYRCGSLFWCC	0	0	1	2	7	9	0	0	0	0	0	0	0	0	0	0
MCCYRCSSLFWCC	0	1	0	3	9	9	0	0	0	0	0	0	0	0	0	0
MCCYRCWSLFWKC	0	0	0	2	16	9	0	0	0	0	0	0	0	0	0	0
MCFCCFLASFWCC	0	0	0	8	29	9	0	0	0	0	0	0	0	0	0	0
MCFIYPRRQPLYWVC	0	0	0	1	8	9	0	0	0	0	0	0	0	0	0	0
MCFKWRLFHHLTPFC	0	0	0	1	7	9	0	0	0	0	0	0	0	0	0	0
MCFPCFSHTFLCC	0	0	1	4	15	9	0	0	0	0	0	0	0	0	0	0
MCFRCFLASFC	0	0	1	14	37	9	0	0	0	0	0	0	0	0	0	0
MCFRCFLASFCCC	0	0	1	5	48	9	0	0	0	0	0	0	0	0	0	0
MCFRCSLASFWCC	0	1	2	20	61	9	0	0	0	0	0	0	0	0	0	0
MCFRFPARCPLFLLC	0	0	0	14	29	9	0	0	0	0	0	0	0	0	0	0
MCFRFPTRCPLFLRC	0	1	2	23	52	9	0	0	0	0	0	0	0	0	0	0
MCFRRRLFHHLTPCC	0	0	0	0	12	9	0	0	0	0	0	0	0	0	0	0
MCFRWLLFHHLTPFC	0	0	0	0	9	9	0	0	0	0	0	0	0	0	0	0
MCFRWPIRSHLYWLC	0	1	0	0	17	9	0	0	0	0	0	0	0	0	0	0
MCFRWRLFRHLTPCC	0	0	0	1	31	9	0	0	0	0	0	0	0	0	0	0
MCFRWRLIHHLTTYC	0	0	0	0	13	9	0	0	0	0	0	0	0	0	0	0
MCFRWRRFHHLTPFC	0	0	0	0	5	9	0	0	0	0	0	0	0	0	0	0
MCFVCFRHLFWCC	0	0	0	0	10	9	0	0	0	0	0	0	0	0	0	0
MCFVCFRHSFLCR	0	0	0	6	25	9	0	0	0	0	0	0	0	0	0	0
MCFVCFRYSFLCC	0	1	2	14	40	9	0	0	0	0	0	0	0	0	0	0
MCFVYPRRQALYWIC	0	0	0	3	11	9	0	0	0	0	0	0	0	0	0	0
MCFVYPRRQPLYWGC	0	0	0	1	21	9	0	0	0	0	0	0	0	0	0	0
MCFVYPRRQPSYWLC	0	0	1	1	5	9	0	0	0	0	0	0	0	0	0	0
MCFVYPRRQRLYWIC	0	0	0	2	12	9	0	0	0	0	0	0	0	0	0	0
MCFVYQRRHPLYWIC	0	0	0	2	13	9	0	0	0	0	0	0	0	0	0	0
MCFYRCWSLFWCC	0	0	0	0	6	9	0	0	0	0	0	0	0	0	0	0
MCHLCFGKLFWCC	0	0	0	1	10	9	0	0	0	0	0	0	0	0	0	0
MCHLCFSKLFWWC	0	0	0	4	9	9	0	0	0	0	0	0	0	0	0	0
MCHRFPSSRHLFWAC	0	0	1	14	28	9	0	0	0	0	0	0	0	0	0	0
MCIDYPRRQPLYWIC	0	0	0	0	14	9	0	0	0	0	0	0	0	0	0	0
MCIKFPWPFPIFWVC	0	0	0	1	6	9	0	0	0	0	0	0	0	0	0	0
MCIRWPARQPLFLLC	0	0	0	1	4	9	0	0	0	0	0	0	0	0	0	0
MCIRWPARQPLFWMC	0	0	0	1	12	9	0	0	0	0	0	0	0	0	0	0
MCIRWPARQPRFWLC	0	0	0	1	3	9	0	0	0	0	0	0	0	0	0	0
MCIRWPARQSLFWYC	0	0	0	0	16	9	0	0	0	0	0	0	0	0	0	0
MCIRWPARQSLLWRC	0	0	0	0	4	9	0	0	0	0	0	0	0	0	0	0
MCIRWPARQSLYWMC	0	1	1	0	2	9	0	0	0	0	0	0	0	0	0	0
MCIRWPARQSQIWLC	0	0	2	0	13	9	0	0	0	0	0	0	0	0	0	0
MCIRWPNLNALFWLC	0	0	0	0	10	9	0	0	0	0	0	0	0	0	0	0
MCIRWRLFHHLTPCC	0	0	0	1	8	9	0	0	0	0	0	0	0	0	0	0
MCIRWSARQPLFWLC	0	0	1	1	7	9	0	0	0	0	0	0	0	0	0	0
MCIYRLSDFCFVC	0	0	1	0	3	9	0	0	0	0	0	0	0	0	0	0
MCIYRLSDICVVC	0	0	0	0	5	9	0	0	0	0	0	0	0	0	0	0
MCKYHRVFYLAPLRC	0	0	0	2	13	9	0	0	0	0	0	0	0	0	0	0
MCLLWRRHFDRYWVC	0	1	1	1	11	9	0	0	0	0	0	0	0	0	0	0
MCLLWTRHFDMYWVC	0	0	1	5	24	9	0	0	0	0	0	0	0	0	0	0
MCLLWTTHFDRYWVC	0	0	0	4	11	9	0	0	0	0	0	0	0	0	0	0
MCLLWTWHFDRYWVC	0	0	0	12	39	9	0	0	0	0	0	0	0	0	0	0
MCLRWRLFHHLTPLC	0	0	0	0	5	9	0	0	0	0	0	0	0	0	0	0
MCLRWRLLHHLTPFC	0	0	0	1	4	9	0	0	0	0	0	0	0	0	0	0
MCLRWRLLHHLTPYC	0	0	0	2	24	9	0	0	0	0	0	0	0	0	0	0
MCLYCFRKSFWCC	0	0	0	5	37	9	0	0	0	0	0	0	0	0	0	0
MCNRWPARQSLLWLC	0	0	1	1	12	9	0	0	0	0	0	0	0	0	0	0
MCRFCFSKHFWCC	0	1	0	2	13	9	0	0	0	0	0	0	0	0	0	0
MCRLCFDKLFWCC	0	0	0	0	7	9	0	0	0	0	0	0	0	0	0	0
MCRLCFIKLFWFC	0	0	0	1	13	9	0	0	0	0	0	0	0	0	0	0
MCRLCFINLFWCC	0	0	0	1	3	9	0	0	0	0	0	0	0	0	0	0
MCRLCFKKLFWCC	0	0	0	0	4	9	0	0	0	0	0	0	0	0	0	0
MCRLCFNKLFLCC	0	0	0	0	14	9	0	0	0	0	0	0	0	0	0	0
MCRLCFSKHFSCC	0	0	0	1	4	9	0	0	0	0	0	0	0	0	0	0
MCRLCFSKIFLCC	0	0	0	2	11	9	0	0	0	0	0	0	0	0	0	0
MCRLCFSKLFLSC	0	0	0	5	13	9	0	0	0	0	0	0	0	0	0	0
MCRLCFSKLFWCCSC	0	0	0	1	11	9	0	0	0	0	0	0	0	0	0	0
MCRLCFSKLFWCG	0	0	0	1	16	9	0	0	0	0	0	0	0	0	0	0
MCRLCFSKLYCCC	0	0	0	0	4	9	0	0	0	0	0	0	0	0	0	0
MCRLCFSRLFLCC	0	0	0	0	15	9	0	0	0	0	0	0	0	0	0	0
MCRLCLSKLFWYC	0	1	0	0	10	9	0	0	0	0	0	0	0	0	0	0
MCRLRFSRLFWCC	0	0	0	2	11	9	0	0	0	0	0	0	0	0	0	0
MCRLSDFWVVC	0	0	0	2	8	9	0	0	0	0	0	0	0	0	0	0
MCRPCFSKLFWCC	0	0	0	0	4	9	0	0	0	0	0	0	0	0	0	0
MCRQCFSKLFWCC	0	0	0	0	7	9	0	0	0	0	0	0	0	0	0	0
MCRRWPSREALFWLC	0	0	0	0	15	9	0	0	0	0	0	0	0	0	0	0
MCSFLLHKLYWCCNC	0	0	0	0	8	9	0	0	0	0	0	0	0	0	0	0
MCSKFPWPFPIFWLC	0	0	0	2	7	9	0	0	0	0	0	0	0	0	0	0
MCSNKWKLANRSWAC	0	0	0	0	6	9	0	0	0	0	0	0	0	0	0	0
MCSNMCKLANRWWVC	0	0	0	0	13	9	0	0	0	0	0	0	0	0	0	0
MCSNMWKLANPWWAC	0	0	0	7	29	9	0	0	0	0	0	0	0	0	0	0
MCSNMWKLANPWWVC	0	0	0	0	13	9	0	0	0	0	0	0	0	0	0	0
MCSNMWKLANRWSVC	0	0	0	1	7	9	0	0	0	0	0	0	0	0	0	0
MCSNMWKLANRWWEC	0	0	1	0	16	9	0	0	0	0	0	0	0	0	0	0
MCSNMWKLANRWWVCGC	0	0	0	1	6	9	0	0	0	0	0	0	0	0	0	0
MCSNMWKLSNRWWAC	0	0	1	6	16	9	0	0	0	0	0	0	0	0	0	0
MCSNMWKLSNRWWVC	0	0	0	0	6	9	0	0	0	0	0	0	0	0	0	0
MCSQSRVLYELWRVC	0	0	4	4	21	9	0	0	0	0	0	0	0	0	0	0
MCSTMWKLANRWWVC	0	0	0	0	1	9	0	0	0	0	0	0	0	0	0	0
MCSYCFRKSFWCC	0	0	1	9	30	9	0	0	0	0	0	0	0	0	0	0
MCTKFPSPFPIFWAC	0	0	0	3	14	9	0	0	0	0	0	0	0	0	0	0
MCTKFPWPFPIFWWC	0	1	0	0	11	9	0	0	0	0	0	0	0	0	0	0
MCTKFPWRFPIFWAC	0	0	1	2	20	9	0	0	0	0	0	0	0	0	0	0
MCTRTCFYGFWYYSC	0	0	0	3	14	9	0	0	0	0	0	0	0	0	0	0
MCTRTIFYGFWYYAC	0	0	2	3	28	9	0	0	0	0	0	0	0	0	0	0
MCTRTSFYVFWYYAC	0	1	0	2	12	9	0	0	0	0	0	0	0	0	0	0
MCVPCFSHTFICC	0	0	1	3	12	9	0	0	0	0	0	0	0	0	0	0
MCVPCFTHTFLCC	0	0	1	12	21	9	0	0	0	0	0	0	0	0	0	0
MCVPWPNLNALFWLC	0	0	0	2	11	9	0	0	0	0	0	0	0	0	0	0
MCVRWPNLNAFFWLC	0	0	2	4	25	9	0	0	0	0	0	0	0	0	0	0
MCVRWPNVNALFWLC	0	0	0	5	15	9	0	0	0	0	0	0	0	0	0	0
MCWHCFRKSFWYC	0	0	0	1	23	9	0	0	0	0	0	0	0	0	0	0
MCWYCFRKSFSCC	0	0	0	4	20	9	0	0	0	0	0	0	0	0	0	0
MCWYCIRKSFWCC	0	0	1	7	23	9	0	0	0	0	0	0	0	0	0	0
MCWYRCWSLFWCC	0	0	0	0	9	9	0	0	0	0	0	0	0	0	0	0
MCYAYPRRQPLYWIC	0	0	0	0	10	9	0	0	0	0	0	0	0	0	0	0
MCYDYPRRQPLYWIC	0	0	0	2	16	9	0	0	0	0	0	0	0	0	0	0
MCYKCFTGLFLRC	0	0	2	14	39	9	0	0	0	0	0	0	0	0	0	0
MCYKCFTGLFLSC	0	0	3	20	35	9	0	0	0	0	0	0	0	0	0	0
MCYKWPIRSHLYWLR	0	0	0	6	28	9	0	0	0	0	0	0	0	0	0	0
MCYKWPTRSHLYWCC	0	0	0	0	22	9	0	0	0	0	0	0	0	0	0	0
MCYLCFSKLFWCC	0	0	0	1	3	9	0	0	0	0	0	0	0	0	0	0
MCYRFPSSRHIFWAC	0	0	0	4	24	9	0	0	0	0	0	0	0	0	0	0
MCYRHPHSNPLFWGC	0	0	0	2	10	9	0	0	0	0	0	0	0	0	0	0
MCYRHPHSNPLFWYC	0	0	0	0	8	9	0	0	0	0	0	0	0	0	0	0
MCYRHPHSNSLFWAC	0	0	0	6	26	9	0	0	0	0	0	0	0	0	0	0
MCYRHPRSNPLFWLC	0	0	0	0	4	9	0	0	0	0	0	0	0	0	0	0
MCYRWRLFHHLTTYC	0	0	0	0	11	9	0	0	0	0	0	0	0	0	0	0
MCYRYPHSNPLFWCC	0	1	0	0	6	9	0	0	0	0	0	0	0	0	0	0
MCYVCFEHRLLCC	0	0	0	9	26	9	0	0	0	0	0	0	0	0	0	0
MCYVCFSHSFSCC	0	0	0	1	12	9	0	0	0	0	0	0	0	0	0	0
MGRLCFSKLFWCC	0	0	1	2	15	9	0	0	0	0	0	0	0	0	0	0
MSFVCFRHSFLCC	0	0	0	2	26	9	0	0	0	0	0	0	0	0	0	0
MSTRTSFYGFWYYAC	0	0	2	8	40	9	0	0	0	0	0	0	0	0	0	0
MSVRWPNLNALFWLC	0	0	0	3	22	9	0	0	0	0	0	0	0	0	0	0
MYCFKFRDLFWVC	0	0	0	1	13	9	0	0	0	0	0	0	0	0	0	0
MYFRWRLFHHLTPFC	0	1	1	0	3	9	0	0	0	0	0	0	0	0	0	0
MCCFKFRDFFWVF	0	0	0	6	13	8	0	0	0	0	0	0	0	0	0	0
MCCFKFRDLFWSC	0	0	0	0	10	8	0	0	0	0	0	0	0	0	0	0
MCCFKFRDLFWVR	0	0	1	2	7	8	0	0	0	0	0	0	0	0	0	0
MCCLCFGKLFWCC	0	0	0	0	4	8	0	0	0	0	0	0	0	0	0	0
MCCTCFVNLFWLC	0	1	0	7	41	8	0	0	0	0	0	0	0	0	0	0
MCCTRFLNLFWLC	0	0	2	3	8	8	0	0	0	0	0	0	0	0	0	0
MCCTRFVNLIWLC	0	0	1	7	25	8	0	0	0	0	0	0	0	0	0	0
MCCVCYLARFWLC	0	0	0	4	15	8	0	0	0	0	0	0	0	0	0	0
MCCYNFFSLFWAC	0	0	0	3	24	8	0	0	0	0	0	0	0	0	0	0
MCCYNLFSLFSAC	0	0	0	2	19	8	0	0	0	0	0	0	0	0	0	0
MCCYNLYSLFWCC	0	0	0	1	4	8	0	0	0	0	0	0	0	0	0	0
MCCYRCWSLVWCC	0	1	0	0	8	8	0	0	0	0	0	0	0	0	0	0
MCFRCFACLFWLC	0	0	0	1	51	8	0	0	0	0	0	0	0	0	0	0
MCFRCFAGLFWCC	0	0	0	1	12	8	0	0	0	0	0	0	0	0	0	0
MCFRCFLASFWFC	0	0	0	8	22	8	0	0	0	0	0	0	0	0	0	0
MCFRCFLTSFWCC	0	0	1	6	27	8	0	0	0	0	0	0	0	0	0	0
MCFRFPTRRPLFLLC	0	1	0	16	44	8	0	0	0	0	0	0	0	0	0	0
MCFRGRLFHHLTPYC	0	0	0	3	19	8	0	0	0	0	0	0	0	0	0	0
MCFRWCLFHHLTPYC	0	1	0	5	21	8	0	0	0	0	0	0	0	0	0	0
MCFRWRLFHHFTTYC	0	1	0	1	25	8	0	0	0	0	0	0	0	0	0	0
MCFRWRLFHHLTLFC	0	0	2	1	5	8	0	0	0	0	0	0	0	2	0	0
MCFRWRLFHHLTPFY	0	0	0	0	11	8	0	0	0	0	0	0	0	0	0	0
MCFRWRLFHHLTPYW	0	0	0	0	18	8	0	0	0	0	0	0	0	0	0	0
MCFRWRLFHQFTPYC	0	1	0	0	7	8	0	0	0	0	0	0	0	0	0	0
MCFRWRLLNHLTPYC	0	0	0	0	3	8	0	0	0	0	0	0	0	0	0	0
MCFRWRLLRHLTPYC	0	0	0	0	12	8	0	0	0	0	0	0	0	0	0	0
MCFRWRLYHHLTPYS	0	0	1	1	12	8	0	0	0	0	0	0	0	0	0	0
MCFRWRQYHHLTPYC	0	0	1	1	8	8	0	0	0	0	0	0	0	0	0	0
MCFRWRVFHHLTPYC	0	0	0	1	16	8	0	0	0	0	0	0	0	0	0	0
MCFVCFKHSFWCC	0	0	1	0	8	8	0	0	0	0	0	0	0	0	0	0
MCFVCFRHSFWVC	0	0	0	0	16	8	0	0	0	0	0	0	0	0	0	0
MCFVCFRQSFWCC	0	0	0	0	5	8	0	0	0	0	0	0	0	0	0	0
MCFVYPRHQPLYWVC	0	0	0	0	8	8	0	0	0	0	0	0	0	0	0	0
MCFVYPRRHPLYWLC	0	0	0	0	7	8	0	0	0	0	0	0	0	0	0	0
MCFVYPRRQPLYGIC	0	0	1	4	28	8	0	0	0	0	0	0	0	0	0	0
MCFVYQRRQPLYWVC	0	0	0	0	4	8	0	0	0	0	0	0	0	0	0	0
MCHLCLSKLFWCC	0	0	0	0	5	8	0	0	0	0	0	0	0	0	0	0
MCICKWYTYQYWTRC	0	0	1	2	23	8	0	0	0	0	0	0	0	0	0	0
MCIGEWYTYQYWTHC	0	0	0	2	10	8	0	0	0	0	0	0	0	0	0	0
MCIGKWFTYQYWTRC	0	1	0	4	27	8	0	0	0	0	0	0	0	0	0	0
MCIGKWYTNQYWTRC	0	0	0	8	38	8	0	0	0	0	0	0	0	0	0	0
MCIGRWYTYQYWTCC	0	0	0	0	12	8	0	0	0	0	0	0	0	0	0	0
MCIGRWYTYRYWTRC	0	0	0	0	6	8	0	0	0	0	0	0	0	0	0	0
MCIGWPARQSLFWLC	0	0	0	0	9	8	0	0	0	0	0	0	0	0	0	0
MCILHGLVYWAPKQC	0	0	0	3	12	8	0	0	0	0	0	0	0	0	0	0
MCIRWLNKYWPC	0	1	1	17	19	8	0	0	0	0	0	0	0	0	0	0
MCIRWPARESLFWLC	0	0	0	1	14	8	0	0	0	0	0	0	0	0	0	0
MCIRWPARLSLFWIC	0	1	0	0	3	8	0	0	0	0	0	0	0	0	0	0
MCIRWPARQSLFRIC	0	0	0	1	7	8	0	0	0	0	0	0	0	0	0	0
MCIRWPARQSMLWLC	0	0	1	1	13	8	0	0	0	0	0	0	0	0	0	0
MCIRWRLIHHLTPYC	0	0	0	0	4	8	0	0	0	0	0	0	0	0	0	0
MCIRWTARQPLFWLC	0	0	0	0	4	8	0	0	0	0	0	0	0	0	0	0
MCIVYPRRQPLYWLC	0	0	0	0	5	8	0	0	0	0	0	0	0	0	0	0
MCKYHRVFYLAPLCC	0	0	0	2	29	8	0	0	0	0	0	0	0	0	0	0
MCLLWPRHFDRYWVC	0	1	0	1	18	8	0	0	0	0	0	0	0	0	0	0
MCLLWTRHFDRYCVC	0	0	0	5	34	8	0	0	0	0	0	0	0	0	0	0
MCLLWTRHFDRYWVS	0	1	1	4	49	8	0	0	0	0	0	0	0	0	0	0
MCLNMWKLANRWWIC	0	0	0	0	4	8	0	0	0	0	0	0	0	0	0	0
MCLVCFRASFLCC	0	0	2	19	21	8	0	0	0	0	0	0	0	0	0	0
MCMICFRRLFYCC	0	0	1	3	13	8	0	0	0	0	0	0	0	0	0	0
MCNYGSWYGYSYLAC	0	0	0	3	26	8	0	0	0	0	0	0	0	0	0	0
MCNYRLSDFCVVC	0	0	0	1	13	8	0	0	0	0	0	0	0	0	0	0
MCNYRLSDFSVVC	0	0	0	1	3	8	0	0	0	0	0	0	0	0	0	0
MCRFCFSKLFLFC	0	0	0	1	7	8	0	0	0	0	0	0	0	0	0	0
MCRFCFSKLFWLC	0	0	0	0	4	8	0	0	0	0	0	0	0	0	0	0
MCRFCFSKLLWCC	0	0	1	1	6	8	0	0	0	0	0	0	0	0	0	0
MCRLCFRKLFWLC	0	0	0	0	10	8	0	0	0	0	0	0	0	0	0	0
MCRLCFSKRFLCC	0	0	0	0	3	8	0	0	0	0	0	0	0	0	0	0
MCRLCFSNHFWCC	0	0	0	0	13	8	0	0	0	0	0	0	0	0	0	0
MCRLCFSRLFWC	0	0	0	0	5	8	0	0	0	0	0	0	0	0	0	0
MCRLCFSRLFWSC	0	0	0	1	6	8	0	0	0	0	0	0	0	0	0	0
MCRLCSSRLFWCC	0	0	0	2	8	8	0	0	0	0	0	0	0	0	0	0
MCRLFFSKLFCCC	0	0	0	2	8	8	0	0	0	0	0	0	0	0	0	0
MCRLFFSKLFLCC	0	0	0	0	2	8	0	0	0	0	0	0	0	0	0	0
MCRLSFSKHFWCC	0	0	0	0	5	8	0	0	0	0	0	0	0	0	0	0
MCRLSFSKLFWSC	0	0	0	0	8	8	0	0	0	0	0	0	0	0	0	0
MCRSCFSKLFWLC	0	0	0	1	10	8	0	0	0	0	0	0	0	0	0	0
MCRSCFSKLFWYC	0	0	0	1	7	8	0	0	0	0	0	0	0	0	0	0
MCRSLYRLFWAC	0	1	2	16	47	8	0	0	0	0	0	0	0	0	0	0
MCRTPCYGLFHCC	0	0	1	3	9	8	0	0	0	0	0	0	0	0	0	0
MCSFCFSKLFWCC	0	0	0	0	6	8	0	0	0	0	0	0	0	0	0	0
MCSFKFRDLFWVC	0	0	0	9	33	8	0	0	0	0	0	0	0	0	0	0
MCSHCFASRFWCC	0	0	3	12	25	8	0	0	0	0	0	0	0	0	0	0
MCSNMWKHANRCWAC	0	0	0	0	9	8	0	0	0	0	0	0	0	0	0	0
MCSNMWKIANRWWVC	0	0	0	1	9	8	0	0	0	0	0	0	0	0	0	0
MCSNMWMLANRWWAC	0	0	0	3	40	8	0	0	0	0	0	0	0	0	0	0
MCSNRWKLANRWWAC	0	0	0	3	36	8	0	0	0	0	0	0	0	0	0	0
MCSQSWALYELWRVC	0	0	4	11	23	8	0	0	0	0	0	0	0	0	0	0
MCSQSWVLYDLWRVC	0	0	1	2	13	8	0	0	0	0	0	0	0	0	0	0
MCSQSWVLYEIWRVC	0	0	0	2	9	8	0	0	0	0	0	0	0	0	0	0
MCSQSWVLYELRRVC	0	0	2	9	40	8	0	0	0	0	0	0	0	0	0	0
MCSQSWVLYELWRLC	0	1	3	5	50	8	0	0	0	0	0	0	0	0	0	0
MCTKFPWPFPIFRVC	0	0	0	3	5	8	0	0	0	0	0	0	0	0	0	0
MCTKFPWPFPILWVC	0	0	0	3	15	8	0	0	0	0	0	0	0	0	0	0
MCTKFPWPSPIFWCC	0	0	0	0	16	8	0	0	0	0	0	0	0	0	0	0
MCTRTSFYGFWYYACGC	0	0	1	3	21	8	0	0	0	0	0	0	0	0	0	0
MCTRWPARQSLFWCC	0	0	0	1	16	8	0	0	0	0	0	0	0	0	0	0
MCTRWPARRPLFWLC	0	0	0	0	2	8	0	0	0	0	0	0	0	0	0	0
MCVLWTRHFDRYWVC	0	0	0	1	17	8	0	0	0	0	0	0	0	0	0	0
[truncated: 384,790+ more rows]

## Sheet: T18_1 selection FGF-R4
Sequence	FGFR4_read_R2	FGFR4_read_R3	FGFR4_read_R4
MCKYSKDLWLYRLWC	410	1946	24401
MCREIRYWQLYRAFC	300	1488	18618
MCEHLFYYLLVKRQC	200	1080	18801
MCYKNISTGIFLYC	220	925	16595
MCTTLYYYKLWRRC	284	1379	16455
MCYYNFLNKVLVYC	218	1025	15991
MCYNVLWYQWKRRLC	262	1320	15112
MCNIILYKIMKNRC	377	989	14232
MCKEYEILWYKLQYC	189	655	12931
MCKHLYYYLLWKKC	121	535	11637
MCKQLYYYLILHRKC	135	643	11218
MCLKYVQFYRALHKC	162	792	11274
MCYKHILWYKIQKLC	146	677	10342
MCDLFYYKLVRRYC	114	502	9113
MCKRHIRYWQLYVC	174	736	8941
MCRHLAYYLINRRC	107	650	8425
MCRHIVYYRIFRGSC	168	783	8506
MCNLSIIHGYVAYIC	193	732	8038
MCREVLYWKLWRKAC	165	909	8004
MCNVLLYKVLRHC	192	793	7791
MCYTVLWYKYQKKC	109	419	7568
MCYVHYLTKQLVFC	249	1113	7530
MCHIWYFNNQFHYVC	204	767	7600
MCRHLVYYLAYRRC	176	823	7314
MCYNVLWYQVIRRHC	192	869	7154
MCKRHLIYYKIARC	272	986	7025
MCPIHFFKIVYRHC	230	822	6716
MCTGRHLYYWKLFHC	175	801	6242
MCYNVLWYRFIKAKC	104	550	6491
MCHRHLYYWRLFHSC	100	611	6282
MCAKEHLFYYLLWC	171	719	6158
MCDSIRAQYARWWIC	163	736	6176
MCHEIIWYKLQRVC	165	740	6247
MCHIVLYKILRHC	158	579	6191
MCRRHVYYYLLHLC	189	713	6192
MCHFKRDLFYYFLIC	112	345	5845
MCFKREVVYWNVWRFC	144	641	5854
MCNHHLYYYLLWSKC	153	610	5788
MCYTYLWYQYQRKFC	166	617	5512
MCFRHWKTAAFVYC	150	730	5393
MCNVLIYKIWRKC	105	381	5205
MCEWFYYHKSWYVYC	163	444	5094
MCHRHLYYYKIWRSC	94	495	4934
MCYHRHIFQNHWYKC	107	373	4856
MCYEVFWYKYERRQC	142	534	4798
MCFHNFKTGVIVYC	172	730	4734
MCYTVLWYQWRRAC	143	499	4687
MCYTIHWYQYQRRC	78	386	4609
MCHLFYYKIWQRSLC	233	679	4496
MCYTVHWYKYQRRHC	151	545	4476
MCYKREIRYWQIFC	115	371	4409
MCTKEIIWYKLQRIC	106	337	4376
MCYTVLWYKYLKKC	111	396	4366
MCKRHLIYYQIIHKC	99	393	4305
MCKRYITYFRAFHYC	71	308	4233
MCTYVYYYKLFHKC	104	363	4159
MCHRLVLYYRAFKKC	126	487	4100
MCYRHFPTGVFVYC	129	583	4090
MCYSILWYQFQRKC	126	432	3885
MCYNTLWYIYQKRQC	129	566	3940
MCYYYSHNNVLAYC	125	447	3923
MCYKNWPTGVIIYC	93	426	3790
MCKRHLMYYFLFC	104	378	3518
MCHLFYYKLFHSC	71	284	3555
MCQLYYYLLHKRC	184	562	3525
MCKVWYVHPRFVYVC	106	337	3640
MCHRHVVYYLIHRLC	47	216	3544
MCWWFKQHEFWFKVC	195	868	3368
MCSIILYKIMKNRC	86	222	3369
MCNDLFYYLLVHKYC	108	267	3375
MCYYVQYYRVIRAC	117	324	3254
MCYEYLWYKYYRKKC	73	300	3188
MCNKRILTYYRLWC	110	596	3059
MCHLFYYLQFHSKC	89	302	3049
MCYLYYYKLWHRKC	89	332	3013
MCWVNIQNNVIVYC	194	805	2992
MCEFYRIIQRRIFWC	89	335	2987
MCYKNWQTGVFVFC	138	874	2987
MCDRILFYYLLHQSC	97	346	2974
MCFPVLWYKIARGKC	111	513	2864
MCYYEVQWYRWRVKC	121	358	2866
MCYYNIESHLLVYC	142	497	2839
MCRWVKYYQLVHRKC	68	281	2852
MCYEILWFRYQRQKC	44	223	2718
MCDLYYYKLFHRQC	99	408	2756
MCWYVQHSFYWERLC	122	728	2750
MCKRYIRYYQLYHC	93	302	2725
MCSILWYKITKPLC	88	286	2603
MCHLYYYKLWFRRC	121	448	2668
MCYKNIDNGVLVFC	100	558	2636
MCREVYYYTLYIKHC	107	416	2469
MCYKDLFTGVIIYC	81	314	2445
MCHLQYYLIFRRHC	124	504	2423
MCRDFYYYLLVHKC	91	369	2405
MCHRSIIWYKVQYC	76	226	2367
MCEVWVINRQFYWVC	142	438	2358
MCYYVHWFRYVNKC	86	322	2256
MCTYLYYWKLFHKC	81	214	2205
MCLDLYYYKLFRRQC	125	595	2272
MCRWVRYYQIVRRC	69	307	2210
MCTWLYYYKLHKSC	104	330	2162
MCDLYYYLLYKKYC	80	225	2169
MCHLFYYLQFHRDC	64	295	2163
MCRVLKYYLLWKKC	54	221	2097
MCNIWLYKVLRYC	86	252	2112
MCYNVYWYLYSRRKC	95	397	2111
MCLHLYYYKLFRRC	71	273	2122
MCKYATLQWYKWFYC	58	212	2067
MCKREIRYWQLWQC	115	390	2102
MCVWPKWLTKFILRC	200	424	2096
MCYNFRWYVYQRRQC	96	312	2109
MCKFIQYYRVSRRWC	124	258	2047
MCYEVLWYKLHYC	105	376	2042
MCDYNHLRWKYWWIC	59	191	2025
MCYLYYYQLFHRKC	107	310	2041
MCDWYVTIYKVLKKC	74	211	1975
MCYEDEVWLYKVLYC	105	340	2035
MCPYAIYWYKWRKTC	113	438	1956
MCYNVFWYQYLHRYC	112	310	1925
MCAKYFLIWRAYQQC	61	219	1954
MCKKHVKYFLIWSLC	75	233	1930
MCYEVLWYKWQYASC	140	355	1943
MCFKDYRGVFVYC	281	609	1929
MCYYHYLTKQLIYC	102	335	1882
MCHIRYWQLVRKHC	110	428	1881
MCLKHVLLYKIARHC	77	281	1952
MCAKHRFFYLLVRKC	70	265	1839
MCREVYYYRLYKSHC	124	423	1958
MCREIYYYILQRRRC	94	336	1844
MCKRYLYYYLLAKC	57	240	1816
MCKRHLYYYLLQAC	82	268	1833
MCYVNVVNKVIVYC	69	186	1845
MCVKHVLLYKVLHQC	52	182	1830
MCFKSHWSGFWFC	53	203	1815
MCWVQYYRVHRRQQC	86	254	1845
MCYRYYNTGVFAYC	158	531	1770
MCHLFYFLLHKKRQC	61	210	1766
MCQLFYYLQHKRHIC	103	347	1817
MCYVTIYKLYRGRC	81	234	1758
MCEVVLYKLLKRAC	111	280	1746
MCHRYIYLDYWHC	84	235	1719
MCHVPFYYYRIWHHC	137	322	1716
MCREVLYYIVWRKHC	59	217	1722
MCWFYLHNKRLAYC	141	369	1714
MCDRQLYYYLLHIC	66	240	1719
MCKRQLYYYILYHSC	60	175	1713
MCTELYYYKLWLAC	94	270	1684
MCWWVQHQFYWQQVC	113	444	1684
MCNTYAVIWYKLAYC	62	254	1674
MCVWYKNQWWREVVC	73	327	1663
MCYKYDLLYWKIFC	90	254	1644
MCAIIWYKIHKQHC	62	191	1682
MCDLFYYLHWHKC	93	243	1617
MCEIKYFLIWKRWC	70	173	1606
MCYLYYYKLHHRRWC	67	267	1607
MCPYNSIIWYKIQYC	55	210	1558
MCKWVKYYVIHRRAC	69	198	1565
MCEHKHPFWNYWRKC	67	217	1566
MCNKRFIRFWQIWKC	40	156	1539
MCREIIWYKIAKKC	49	143	1532
MCYKNWHTHVLVYC	134	454	1564
MCGHNAVRWKYWWIC	83	340	1504
MCWWFKQHEFWIQSC	85	365	1557
MCKRYLTYYLLFHC	76	266	1514
MCLYIQLYRAFNKC	92	266	1500
MCYEVLWYKIQYC	55	210	1531
MCKQFEIIWYKLQRC	59	99	1509
MCNLFYYLLHHRRC	72	224	1523
MCKRHFVYWRVFHAC	74	218	1544
MCQVLIYKILRGGYC	90	357	1490
MCYGYEVLWYKLQYC	91	340	1494
MCYEVRYYQIWRSC	130	337	1476
MCNNSRILLFYKIWC	94	253	1435
MCFLDHKTKVFVYC	88	238	1438
MCREVLFYRIYRKAC	64	222	1431
MCYHRHPYQLFWRYC	82	233	1452
MCAVLWYKINYTC	83	286	1418
MCAKYVTFYRVWRKC	104	251	1423
MCRWVHYYRLIHKC	64	179	1417
MCYAKYWYAYYNKC	60	185	1370
MCEHLYYYLLIQRGC	105	420	1402
MCHVFYYLLHQKAIC	66	245	1449
MCWVHWKTKQLIYC	38	185	1343
MCYIRYWQIYRRHC	77	304	1340
MCYKHWESGVFVYC	103	256	1347
MCKQHLYYYLLFKC	49	199	1334
MCEVIWYKIQWRNC	67	137	1302
MCPYSWFDWQDWRLC	83	292	1328
MCKRYLFYYLISHC	71	178	1335
MCRALYYYKLFSKC	62	215	1299
MCYHVQYYRIIRRC	62	173	1316
MCRHIYYYLLHKRC	56	225	1285
MCREVFYYLLWRKC	71	190	1296
MCDLYYYLLHIKHVC	75	201	1288
MCYYVRYYQVFRAC	85	185	1301
MCFNIYWYKWQRKKC	45	165	1294
MCYRDIRSHIIVYC	135	382	1268
MCYRYYGSGVFAYC	204	695	1290
MCLWYYLQFHRREC	84	274	1268
MCRRHILYYQIVHKC	77	208	1248
MCKRYIKYWTIWHC	66	221	1247
MCRFVYYYKLFHHKC	43	100	1259
MCHVFYYLLNRRC	74	209	1249
MCESDAYRWKLWWVC	91	252	1250
MCHSIIWYKIQYC	55	155	1246
MCKRHIVYYRLWQLC	86	276	1267
MCDVILYKILRKHC	65	196	1254
MCDIIIYKVLRQC	81	273	1241
MCFVNIQNNVIVYC	124	339	1229
MCHLFYYLHWKKC	51	182	1204
MCHKRYVRFYQIYLC	76	215	1202
MCREVHYYRLYVKSC	86	285	1202
MCHVMYYRIMKSLAC	39	155	1217
MCPVLWYKIVKQLC	145	378	1240
MCKRHILYYQIAKWC	72	180	1210
MCRYSKFWYQYVRRC	92	299	1200
MCKKHFVYWYYYRYC	61	123	1175
MCDVLIYKILQRFHC	119	344	1177
MCNHLFWYLQHHKC	28	137	1199
MCKRQLYYYLLAHC	87	273	1161
MCVVYYKLWLKHSRC	50	141	1173
MCKRQLYYYILSRQC	67	315	1196
MCKREVIYYLLQRAC	43	183	1148
MCKKYIRYWQLWHQC	61	243	1144
MCPIHVFYYKLFHQC	40	154	1148
MCHYILYWKLFHKC	68	137	1124
MCINWHFQSHNWRSC	180	348	1154
MCFYVQLYRAFKKC	73	145	1117
MCLVSIYKVLRHC	144	312	1115
MCEQVLYYLIIRRAC	67	207	1150
MCNRHFYYWLIWHKC	52	129	1121
MCRELYYYLLISSHC	84	192	1097
MCELKHFLWYYYYNC	77	156	1126
MCEVIWYKINYHC	47	118	1107
MCDLWFYKLWHRRVC	82	264	1134
MCGRHIVYWKIWQSC	69	298	1096
MCKLVRHPDYTYYDC	75	176	1111
MCFKRHLYYYRLWVC	65	181	1083
MCTYDFVLGHHYLIC	54	112	1079
MCHPRHVLYYRLFLC	85	268	1077
MCREILYYKLWASWC	85	252	1070
MCYKYTPFHDWIC	83	233	1091
MCNITIYKLLRYC	82	254	1082
MCYNILWYQWRIKKC	66	163	1058
MCAIIWYKLQRKC	56	100	1055
MCVKRFIRYYQLYKC	55	119	1061
MCYYNVRNSIIVYC	96	207	1064
MCYKNIDSGQFVYC	57	255	1149
MCQLFYYLLHQRKC	62	187	1032
MCYHRHPYEPLWRVC	99	243	1061
MCDLFYYLLYRKGSC	60	207	1038
MCEHLFYWRIWRRAC	75	266	1044
MCWFYYHNRVLAYC	81	216	1031
MCRELYYYLIVQKYC	45	125	1031
MCEVLWYKLQYVC	95	223	1027
MCKRLIQYYRVFTLC	90	213	1027
MCYAVHWYKYQRKC	74	173	1017
MCSIIWYKLQKGFC	77	188	1014
MCFNVLWYKYLKKC	49	135	1021
MCRDLFYWQLWHRC	62	206	1030
MCHRHLIYYKLYHC	86	208	1218
MCYEVLWYKHQRRC	73	166	1012
MCYIRYWQIFRKHC	61	181	994
MCQKHLYYYLIYKAC	83	187	1011
MCSVVLYKILRRQC	89	262	1064
MCQELFYYLSIRKVC	68	190	983
MCHREYLYYWRIFHC	65	257	985
MCKRHVLYYLIHC	39	116	1003
MCNLSIVWYKIQYC	59	138	1001
MCKLTTYWKVWRAFC	64	206	969
MCKRQLIYYLIHLC	61	177	960
MCYATYWFQYQRRAC	57	152	983
MCPVLIYKIWYKQC	82	260	962
MCYAKLWYTYIRKC	51	114	955
MCYNSILWYKITYC	76	185	954
MCKEILFYKIFYC	79	128	948
MCYTRFYNWEKWQLC	73	180	962
MCAYEVLWYQYNRQC	53	189	958
MCFKDYITSVFVYC	80	243	948
MCEQRSRWSNYWYPC	47	176	954
MCHKRLIRYWQIFIC	52	151	948
MCWPSWLTKYVLSC	93	260	950
MCHDRHLIYYMIMC	52	235	935
MCYRHWNTGVFVYC	71	207	961
MCAVIWYKINYHC	36	104	934
MCYRSIHTGVYVYC	115	376	925
MCNIVLYKILRWC	76	139	926
MCKREVVYYRIWSC	104	228	940
MCEIITLYKVLRYC	54	167	916
MCWWFKEHFYWYKLC	73	177	929
MCFVRWPDGLLVYC	58	187	935
MCEVLIWKILSKC	83	253	921
MCWRHLAYYRIYRSC	55	177	908
MCFLDIRSRKIVYC	98	242	926
MCHYFPWSWDIEVWC	76	183	904
MCRHVLYYLLYRREC	63	170	918
MCHLFWYKQFWRHC	89	268	885
MCYHSIRTGVLIYC	102	376	903
MCVHRHPFSIYWISC	58	110	887
MCHKRALYYYLLSIC	73	216	902
MCTYEFLFEELYLHC	38	99	897
MCNVLLYKILSIC	110	245	877
MCKIHNWWKHWYIC	77	218	875
MCYIKDVLWYKIRYC	54	162	893
MCDRHLLYYKLFNHC	64	156	887
MCVKAFLLWKKVFC	52	140	871
MCKRHLIYYKLWIC	63	160	872
MCKDLFLYLLWRRRC	67	255	889
MCYKDSRTGIFLYC	106	324	885
MCNNWEILLYKVLKC	66	211	869
MCKRHIYYYILYHSC	79	143	876
MCYYDIQSHILIYC	96	226	871
MCRLVQYYRLWQRC	119	301	856
MCYVHHKTFQLIYC	93	237	866
MCVYEYTFHRLIVKC	28	76	854
MCKLHIVYWKINRYC	41	106	856
MCREVLYYLLFQPHC	92	299	871
MCAKRILQYWRIWC	49	129	840
MCYNVFWYKYQRKYC	53	121	855
MCTDVFYYLLVRRYC	45	98	843
MCEIVLYKVLRKC	88	144	836
MCRFVIYYKLFHKC	56	87	852
MCYAYFWYRYQRRKC	45	133	836
MCNRQLAYYRIWRRC	78	203	834
MCKDLWFYLYWRKVC	34	122	829
MCYVLQWYQFQRRC	94	285	830
MCKRLVLYYLLQRC	21	68	832
MCRIVKYWQIWRRC	41	143	826
MCYTKRPYDQHWRHC	75	175	828
MCDVVLYKVLRHC	82	157	833
MCYHRHRYQFHWHNC	57	123	830
MCFINVQNGVIVYC	66	152	852
MCKRHVLYWLLFQQC	85	280	830
MCYTKHPLSLKWYKC	68	139	825
MCNLYYYLAWHRKC	84	256	811
MCYNVLWYQYYKSIC	31	90	833
MCHLFYYKFWRKFC	62	105	815
MCDVVLYKVLRLSC	96	189	830
MCYEVLWYKIQRWC	58	133	804
MCREVLYYRLWASYC	78	226	810
MCYVQYYRAYNRQHC	107	213	808
MCNHFDVLWFKLQYC	60	139	804
MCKFAKYWIVWHHC	54	122	794
MCNRHVYYYLLYNIC	47	182	794
MCYKFRFLDRWHC	36	99	788
MCHRFYYLDYWHC	82	175	782
MCHVLIWKIWRSC	116	227	794
MCHHKHPLSHYWHSC	66	113	797
MCRLVLYYRLFNKC	56	176	796
MCHQVLFYKVLRHC	57	127	791
MCAVIWYKVQYC	70	182	784
MCYKHWPSGFIVYC	54	126	808
MCDKFVKWYIVFRHC	35	107	775
MCHIWYVNRQFLWIC	92	257	759
MCRHVLYYVLANRFC	76	159	767
MCFWHKHHVFWHQLC	45	84	749
MCDLYYYLLWNRQC	67	197	754
MCQHLFYWKLWHQRC	120	223	760
MCFKDWKTKVIVYC	93	165	774
MCYIVLYKLLRGKC	85	174	758
MCNVQYYRIYRRFC	107	242	751
MCTHEVLWYKIAWSC	79	248	765
MCEQYRVIWYKLAYC	58	150	742
MCPIIWYKLQKRFC	47	137	751
MCNVLLYKLLYGHC	143	321	748
MCYWFKLADFWVKQC	84	190	770
MCFIRDLLYYKLWC	68	194	734
MCPYYILFYKVLRHC	39	109	739
MCYTKKHWYEEWQPC	68	163	738
MCAKYLQYWKVFHKC	74	196	736
MCYYWQYVFERQAC	108	265	729
MCVYEFIFDQIHLHC	53	72	732
MCREVLWYKLVKSTC	59	138	719
MCHLFYYLLHRSHC	47	141	719
MCKKALFYYKIWRSC	66	164	722
MCKTTLFWYRWWNKC	63	262	711
MCYVHWPSAVLIYC	73	210	709
MCHRHLYEPYWHC	41	119	709
MCVRHLLYYKIWC	67	149	703
MCWKNIANGVLIYC	92	233	703
MCFHRHKYTAVWHIC	46	109	851
MCDRHLYFYLIHLRC	44	139	706
MCYVHWQTHQIIYC	53	159	708
MCDYAYRWWYQWKYC	50	134	710
MCHVFYYRVYRRAC	49	177	695
MCSKYVLFYKIAKQC	45	137	694
MCDVVLYKLLRHC	76	155	698
MCNHYVNIYRWFHWC	26	79	685
MCFASIWYQYRRKVC	55	98	680
MCTREVLIYKILHHC	88	244	694
MCKVLHYYRLWNRQC	41	186	676
MCHVQYYRIWQRILC	66	151	675
MCHVQFYRIWRKIC	77	162	673
MCDLYAYILWHRKEC	31	86	672
MCYFNVANGKIVYC	93	263	688
MCHRWIQYYRVHRAC	46	98	683
MCYEVLWYKLIKRC	74	137	682
MCPIVFYKVLRQLC	67	178	669
MCPRLVRYYQLFRLC	74	251	664
MCNLWYYLHWHRHVC	57	181	664
MCYKNFATGVFVFC	64	225	659
MCKYLAYYKAYRYWC	55	121	653
MCLYEYIFQDLRVYC	42	91	665
MCKFKHIDYSYYFYC	31	92	659
MCDIVLYKILRQYC	43	126	682
MCYDIVFDYITVYHC	40	64	647
MCDIIIYKILSRTC	87	184	654
MCPILWYKITKTVC	52	111	652
MCHLFWYRHWLRKC	76	208	645
MCKLHVRLYQIAYLC	89	187	644
MCYYVWPSGLLVYC	83	223	649
MCAKQFFYYLLWRKC	30	122	642
MCPRHVFYYLLQYKC	64	240	642
MCVYTFHGALENIWC	47	99	642
MCYIQYYRVYRRRC	63	241	645
MCWKVYHKDYRYQFC	86	291	650
MCWIYVHAKGWYLC	63	201	634
MCYYYLSGRLAYC	107	291	632
MCHKRHVLYYALFHC	75	136	653
MCDKNIIWYKIQWC	53	191	631
MCHHIVYYRIWRAC	44	119	631
MCDRHLYYYLAMHKC	46	105	651
MCHVYYYLLVHKHC	60	110	630
MCYHRHKFWSNWELC	39	95	630
MCHRHVVYYLIQRC	49	129	629
MCHKYVLYYRAIRSC	63	168	636
MCRALFYYGLFHRHC	57	112	629
MCFHKHPYQRHWLSC	69	170	636
MCYATYWYQWQRKC	69	165	622
MCRDVLYYLIFRSC	49	104	623
MCVHRHPYQKKWQQC	47	101	627
MCRHLAYFKLWFRTC	49	128	613
MCGYHVRYYQIWRAC	41	131	622
MCWWSKHHHFWTKIC	18	88	608
MCNKLVWLFKASHKC	34	101	611
MCKRFVTYYKIWKWC	46	87	605
MCFWIKHPVYYSRVC	81	267	626
MCFAKFWFQWQRREC	43	100	603
MCKQLFYYILFHKC	45	68	603
MCYEVLWYRYTQRKC	64	175	609
MCHVLIYKLLRHC	64	160	608
MCKREIYYYLLFC	85	186	606
MCKKRAILYYLIHC	56	141	606
MCSVVLYKILRFC	61	109	594
MCDVILYKLLYQLC	47	145	591
MCKIWYVDHKFWWVC	56	144	597
MCRYVIYYKVAKKC	52	129	590
MCKHLQYYLLWHKQC	50	167	589
MCWVQYYRVWRKSC	75	176	588
MCLFYYKLWHKRC	50	110	588
MCPHKYIKYWIAWKC	57	138	583
MCDAIWIYKILRSYC	40	61	587
MCVQYYKIWRRFC	60	156	578
MCYYNYVTGILVYC	84	199	582
MCYEVQWYLYQRRC	56	148	581
MCREVLYWKIWLSC	69	218	588
MCENWVVFYKVARQC	65	167	575
MCNRSIKYYIVWRLC	61	118	574
MCKRHIVYYRSWHWC	67	107	596
MCYVRYYQIYKASC	92	167	579
MCHRHPLEYFWHC	61	103	571
MCWWIREPFYWRKAC	83	181	566
MCPREVYYYLLYKC	69	217	572
MCKWVKYYIVARHC	97	211	563
MCHRYIKYWTVYRSC	88	190	577
MCLKRHITYYRVFC	82	212	568
MCHVFYYLLHHRC	36	68	568
MCIWIGSLQNVLYC	51	147	600
MCYIQYYRIIRAHC	106	243	565
MCREIFYYSLYRSHC	84	157	561
MCKHVYFYLLYRRHC	61	124	558
MCYVRWYIQFHRRKC	59	139	560
MCYTRTYEWEQWIPC	82	154	548
MCTQRHLYYYLLFC	84	186	580
MCYHRHPFKEYWQIC	27	77	548
MCFTKKPFSRYWHLC	37	78	548
MCYKAYNRYNVIVYC	86	177	546
MCYTVFWYQYLRKRC	57	107	546
MCKREIKYWLVFC	64	112	546
MCHYHPYRWFWDC	48	86	545
MCYYDWHSGRLIYC	113	259	544
MCKELTYYLIWRNYC	56	127	551
MCNRYLKYYLLYLC	49	106	543
MCYHRPPNSKIWRKC	68	107	546
MCYVHYYLLFHKRPC	63	130	547
MCTQLFYYLLHHQC	43	130	539
MCPQRLLYYWKVWHC	93	195	538
MCDLFYYLLHVRQC	35	162	537
MCFHRHPLSSTWWQC	65	145	536
MCDQRHVYYWQLYHKC	73	173	541
MCFHEFVFNQHIVTC	48	65	534
MCKRHVLYYRIHYWC	65	108	533
MCKRHVIYWRLWQTC	74	183	528
MCHLHYYRIWRRIC	68	153	527
MCHWFDIVWYKIQKC	32	76	527
MCYHRHIYQPLWSTC	47	114	526
MCKQVQYYRLIRKLC	60	156	530
MCDSIVKYYLVYRYC	60	152	523
MCADKKVLYYYLLWC	88	200	529
MCYIRYWQLHVRSC	78	206	529
MCEVWYVSHQFYYVC	53	93	528
MCFQRHPLELRWRAC	56	144	525
MCYNIYWYKYVHREC	68	114	519
MCPYHIKYWIAWRYC	37	142	515
MCFHEILWYKIHYC	29	58	512
MCYLRHIQYYRVWC	94	244	521
MCHEVLWYKVQWLC	55	116	511
MCDVVLYRVLRYYC	56	129	510
MCHLFYYRLYHKC	45	86	510
MCHEIVWYKLQYC	58	124	510
MCYINIYNGRLVYC	44	139	521
MCHPHNWWEHWFIC	76	160	508
MCYSVFWYQYVRKC	65	127	514
MCRHIAYYLLFKKHC	38	120	516
MCYKFTVFHDWIC	38	68	513
MCLNKIHLYYYLLHC	44	109	507
MCRHVFYWKLYHSC	50	143	511
MCHLYYYLRFHARDC	65	166	511
MCNYYKYWYLWQRRC	54	152	506
MCHQFYWPGPYLYKC	63	116	499
MCHVHYYLLVRKALC	38	104	498
MCVYYIWKDEWFRLC	49	88	494
MCWWKYWYQWRRRC	44	101	497
MCYYEFYSRRLVYC	110	305	488
MCRHLYYWRLWHAC	64	182	488
MCRHIVYYQVIHRWC	70	164	487
MCGKIHLLYYKIWC	54	125	484
MCHLFYYKIWRSC	62	149	484
MCKFAIEWYKINYKC	42	75	483
MCPHLYYYLIWRKC	48	126	483
MCEYEYTFHLLTINC	42	102	483
MCDLYYYLLHHRC	46	100	481
MCRYVLYYKLFQKC	34	78	479
MCERTRFYYLLWHRC	54	179	489
MCKYHLFYWLLHSRC	34	89	481
MCHKYNVFWYKYYYC	45	88	479
MCDRLVFYYLLYHKC	43	74	472
MCHHVQYYRVFRKC	59	116	483
MCQHLFYYRLWLKGC	68	146	477
MCFRHAQTGQYVYC	117	283	470
MCDVIIWKIWRKIC	33	68	469
MCYTRHPYEAFWHQC	74	143	476
MCFHRRPFAWNWIPC	44	108	473
MCDIVIYKLLYGQC	58	151	467
MCHLAYWKLFHRHC	79	176	465
MCTHRHPYETLWRQC	96	196	468
MCYPILWYKIQYC	36	66	463
MCKELFYYRFIRRHC	58	145	469
MCYKDYRTGQFIYC	114	319	468
MCHLAYYLHWRRWC	84	211	462
MCPLYLRGGAAFWLC	73	313	470
MCYVLYWKVQHKKC	68	166	460
MCKRHLVYYLQYHKC	55	97	465
MCTHRHRYEYYWRSC	63	130	466
MCKIFYFNRTLHPAC	86	250	459
MCNLYYIQFYRAFLC	55	125	458
MCKDQFYGYQYWQLC	84	163	482
MCHRHLVYYRIVRHC	43	114	456
MCNNRHLLYYKLWC	65	144	454
MCYLDYSTKRLVYC	100	275	453
MCPHHWFKVIYRWC	66	156	451
MCVHRHHLEPFWHTC	30	68	453
MCDFSIVWYKLSYC	44	85	450
MCTYEFTLGRTLKWC	52	155	443
MCDLFWYLQHHKC	38	78	441
MCHLYYYLLHSRHC	75	205	447
MCHYHPYRWIWLC	59	99	443
MCHLFYYQFFHRQQC	42	92	440
MCEILWYKIQKKC	26	64	434
MCNLYYYLIWHKC	64	91	434
MCFHYKVSAFWFTTC	68	120	443
MCYLDINNRKFVYC	60	134	438
MCYTRHKFEEFWHTC	47	100	432
MCDHLFYYRLYLKQC	72	142	441
MCAKLIRYYQVHLRC	81	160	435
MCWWIKHHQFWHQVC	29	77	451
MCYTYLRFYHTQRQC	58	128	438
MCKHLAYYVLFRYC	40	63	429
MCKLIQYYRIYLSAC	44	82	427
MCDHYHPYQWLWLC	40	92	424
MCYTRRYVWQHWKLC	75	150	424
MCNLYYYIIWHRRSC	39	105	438
MCKRHVVYYKLYKC	61	89	423
MCDKRYVVFWRVWTC	52	111	423
MCREIRYFQIWKLTC	63	98	422
MCHLAYYLLHLKHC	56	127	422
MCRYVQYYRVHRRC	47	105	419
MCWWIKYPPFWIQKC	45	141	418
MCYYVQYYRIARYC	80	137	423
MCLYHVRYWQILHHC	23	108	417
MCDRHIYERYWHC	44	76	416
MCNREIYYYLLIHC	53	159	424
MCNEHLFFYLLYHC	98	178	420
MCKLHIVLYQVQRSC	56	111	421
MCYHRHWFSINWLPC	31	58	414
MCKKHIKFYLTFRYC	69	144	413
MCYTRRYHWENWSHC	70	138	413
MCITLYYYKLWRRC	9	30	412
MCHLYYYLLHKKNC	25	84	411
MCYHRHLYDQNWQPC	42	88	411
MCRHVLYYLVQRRWC	43	133	410
MCDLYTVLWYKIQKEC	49	121	409
MCKYKRHLWYYLLHC	38	98	409
MCPLYFIRGQAFYLC	74	171	408
MCTTRKNKWEEWRPC	55	93	407
MCRHLAYYLIFHGC	50	98	407
MCNKHVVFWKVWLRC	59	137	411
MCWWVQHYQFWVLQC	66	186	405
MCKLYLTYYRAYKYC	48	109	404
MCTHVLIYKILRHC	66	164	403
MCQFKFIKQWLRWC	49	96	402
MCEFYSVLWYKLQFC	48	105	402
MCVKYFILWKQYC	30	64	399
MCKYILFQWTDWRQC	40	82	399
MCHLAYYLAFHRLC	39	124	404
MCDVIIYKLLRSAC	65	117	405
MCFLNVTNRKFVYC	59	138	397
MCRGLFYYLQYRKAC	42	96	408
MCYAKYWFAYVRKC	34	86	395
MCNVWLYKIYRYC	45	88	394
MCDVYTSWWHLAWC	75	243	393
MCKLTWLDKVYAIIDC	48	123	392
MCYVKYYTVWRQLC	121	160	391
MCEFRFNYFEHWRIC	33	70	391
MCVITLYKLLRYC	49	81	391
MCYYNYTNQLLIYC	118	226	396
MCDYHPYQWLWLC	45	73	398
MCYTRFKFHPYWLSC	52	123	390
MCHYHPYHWLWLC	40	89	392
MCHPRWLIKILLC	67	160	385
MCREVFYYLLHQKC	45	99	385
MCTYNYTFNRLVIKC	34	70	384
MCYVHYYRIWRAHC	102	226	384
MCTHRHKFINRWWQC	39	99	392
MCRELYYYLRFFRAC	38	82	382
MCDVILWKILRSYC	26	99	388
MCKKWIYYYLISQC	54	96	381
MCVHRHPLDFRWFEC	36	64	379
MCEYRHPYVNYWHEC	31	78	379
MCYNILWYQARRRHC	46	176	447
MCTWHPYQWLWLC	55	102	377
MCNHLYYWKIWHAC	58	110	375
MCHRQLYYYLLWHC	33	79	375
MCYYDYLSHIIVYC	53	118	383
MCYTRKPFQQQWAIC	65	205	373
MCAVKYYLVWRKYC	49	140	372
MCREVLFYLAYRAHC	56	174	370
MCKRHLLYYILFNC	32	53	376
MCKQYLYYYLLHHC	38	92	370
MCYTHLWYKYERRRC	48	130	369
MCKERILLYYLIHC	21	49	376
MCYEIIWYKVQKLC	16	37	368
MCKRLIRYWQLVVAC	27	73	367
MCRDLYYYLLVQSC	77	159	374
MCAKYSHPDYSYWYC	33	80	366
MCTIQRHLLYWKIWC	47	107	366
MCYTRHKYGRWHHC	59	129	371
MCERWVLFYKIRRHC	37	86	364
MCDVIIYKIWRSHLC	65	101	363
MCEHRHPLQNFWAFC	35	75	363
MCHKRILYYYLLC	56	121	363
MCNYKRILTYYRHWC	55	130	362
MCDVVLYKLFRYYC	56	70	362
MCKRHIVYYRLYSFC	49	144	360
MCFKHLFYYRLFKSC	60	109	368
MCEREFLYAYFWVKC	51	74	360
MCYFNIKNGVLLYC	36	62	366
MCKYIFTGSHVTVLC	46	85	367
MCERYVSYYRAWRQC	138	201	365
MCRYIVYYRSWHKC	57	101	359
MCKWAIVWYKLQRGC	46	84	375
MCHLYYYLHWRRSC	45	123	358
MCFHRHKFQHVWRHC	50	103	356
MCKERLVVYYKLWLC	52	120	355
MCEDLFYYLLFHHC	73	117	355
MCNIIWYKIQRGC	95	162	361
MCKREVVYWKVWAC	64	109	354
MCRIVKYYQIWRVKC	43	110	357
MCVYEYVFGYTTVVC	45	72	351
MCTHRHRYEYLWHSC	35	89	350
MCYYNISYYHTGWSC	29	88	418
MCNVLAYYLIWQRC	58	106	348
MCFKNIINRRFVYC	51	129	347
MCNLFYYLLERKFC	53	112	346
MCWHRHKYEQSWHFC	50	55	346
MCYTRHRFIQFWSVC	44	98	346
MCHVYYYLLYKKDC	50	113	351
MCDAKRHLRYWQVFC	67	106	344
MCTREILVYKVLRRC	68	136	343
MCYHNILNGRLIYC	82	120	348
MCKRWIRYWQLVC	44	100	342
MCHEVIWYKVQYC	63	101	342
MCKRHILYYRITHFC	58	111	342
MCKNWVIYWRVARLC	62	164	342
MCYYDVFSHIIVYC	79	124	341
MCFHRHPYELHWSSC	43	73	340
MCEIIWYKVAWKC	32	60	340
MCVKDFFYTYRYWSC	71	98	345
MCWHVRYRFGFYRIC	66	122	339
MCEREVLYWLLVTC	75	212	338
MCYHRHKYQTHWSAC	59	135	337
MCYKTWFIYHRLAC	71	151	336
MCFVQYYRVWRARQC	66	159	342
MCKGAYYLRLYQVFC	72	160	336
MCKRHILYYLTFWHC	45	100	335
MCYKSHWTGFWYC	25	71	358
MCFLHWKHRYFLYC	60	140	334
MCPIWVYKVLRYC	67	126	334
MCYATHWYKLQRRYC	36	89	333
MCHHRHPLHWFWQPC	57	104	332
MCVHLHYYKLHLRHC	44	80	332
MCELFYYLLYHKKC	24	44	331
MCKRQIVYYLINYSC	40	101	331
MCKRHVLYYLITLC	59	165	331
MCTHRHPYHVHWQPC	59	140	330
MCWHRHKYAEFWHHC	42	80	337
MCRDLYYYRVWLRRC	76	183	330
MCTYIQYWKIWRRNC	51	94	329
MCPHRKYLYYYKVFC	67	149	328
MCNFHVIWYKLQYC	41	65	334
MCRYIKYWTVFTQC	84	165	335
MCKRFITYYKVQRLC	29	76	327
MCYYDHKSYVLIYC	65	109	332
MCDLYAYLLFHRKC	29	38	327
MCRLVRYYQILHHC	72	178	326
MCLYTIQFDTVHVVC	27	73	334
MCYTRLNKHAKWQKC	47	87	326
MCHLYYYLIWNKC	58	69	326
MCYWVYWYKYRRQC	31	81	325
MCAYHLTYWKIWRYC	57	119	325
MCGKRHLFYWKLWC	49	105	324
MCHYHPFKWFWDC	23	46	323
MCFHRHKFGFRWQSC	48	93	323
MCEVYYYLLVHRAC	50	117	323
MCFHRHLFEQVWHTC	45	80	322
MCPQFHIIWYKLQHC	62	157	338
MCEHRHRFEFRWHEC	31	40	321
MCYNVLWFKYVHRC	38	63	321
MCRRDLYYWLLIKRC	6	63	320
MCKHLYYYKIVHRWC	36	92	320
MCWHRHPLELHWHPC	52	93	320
MCDVLLWKILYKQC	56	107	320
MCPYYVKYWLIWRHC	28	72	317
MCDVFYYRLWIKHYC	26	72	328
MCDLFYFLIHRRRC	49	82	316
MCHVIWYKIERARC	49	105	315
MCEYPTWLIKYYVVC	54	131	314
MCRWVHYYRILHKC	26	94	355
MCYVHLYRWFHRC	86	89	314
MCRYVSYYRAFNKC	48	94	313
MCTYHPYDWIWLC	46	88	313
MCNLYYYFLIRRQC	55	112	313
MCYTIYWYQWQRKC	65	159	312
MCDADLFYYLLWRRC	54	127	312
MCDRNIYYYLLYRQC	56	133	312
MCHEVLWYKITWRKC	44	84	312
MCYTRLFKWQNWQSC	64	114	311
MCYWSKTGPFWIRWC	77	182	311
MCPYIKYYIVWKC	66	96	309
MCPYKYFYLWKQHWC	50	93	308
MCEVVWYKVQYKC	42	66	308
MCYHKFPWSIYWLNC	27	41	306
MCNVIAFKVWYKHC	78	81	305
MCVWQYSHHYNWHC	57	81	310
MCFKDTKYGVFVYC	62	105	304
MCLYEFVLGSEYIIC	20	49	308
MCKRLVVYYKLQYC	46	76	302
MCAVLWYKVHWKC	43	91	302
MCNEVLYWKVWRFC	65	99	302
MCHVLYYKIFHRKGC	39	83	323
MCKRLVSYWRVIHFC	47	94	302
MCYTHRPFDLFWSTC	50	76	309
MCPKYVLFYKLWLRC	51	138	300
MCPIKWYKVIYRYC	44	97	300
MCPNHWIKYYLVYKC	55	104	300
MCKNLFYYLSYRKHC	37	65	300
MCHFFYWRLFHKKC	29	76	299
MCYKSVWRPFWWFC	47	102	299
MCYEVLWYKITKC	58	85	299
MCKEITYYRIWRVLC	46	114	299
MCEVLAFKVWYRNC	31	55	299
MCHHYWIYWYRRERC	36	76	298
MCHWVIWYKIDKKC	30	53	298
MCKLHVQLYRAHHWC	59	138	297
MCTYEYVFGFNTYYC	26	39	297
MCKRHFLYFKLFHKC	36	73	297
MCRYVVYYQLIRRDC	45	104	296
MCFHRHKFDKYWHSC	20	44	296
MCHLHYYLLWHKLC	103	209	296
MCNVLLYKILFREC	111	156	296
MCYKRQVRYWQIWYC	44	66	319
MCRDILYYFLIRGC	65	138	294
MCNVVLYKVLLKC	65	103	294
MCYVTLYKVLRYC	46	114	302
MCYHRHPYRPLWQRC	32	103	294
MCYQRHIFQDQWHSC	53	72	293
MCYEVLWFKLQSRYC	69	100	293
MCWHRPPYHHRWIKC	37	85	293
MCKFVFLYKAARHC	22	35	293
MCDTVYQRWRLWWIC	51	159	311
MCRAIFYWKLWRRC	36	71	292
MCKQIFYWKLWQKFC	33	67	292
MCPKQIWYYLFWRKC	48	118	291
MCDVVLWKVLRRTC	47	115	291
MCVRHVRYWQIWLC	44	85	291
MCYEKLWFQYQRRC	41	72	290
MCRETYYYLLVYKAC	47	119	289
MCKFKLDLFYYGLVC	70	179	298
MCHLWYYLLQHRSC	50	101	298
MCYHRHKYDQTWHQC	51	104	287
MCYEVQWYQYIRRC	24	58	287
MCNTNLFYWKLWHWC	32	88	287
MCEKHLTYWRIWHWC	69	140	286
MCHKHLFYYLLWC	34	84	286
MCYEVLWWKYLQRYC	36	60	286
MCHKLVAIYKVLHKC	31	62	285
MCAKYIKYWSVFHC	45	79	285
MCYWQYWYSWHRKC	44	97	285
MCKLHLTYYLISKC	39	77	285
MCHFVYWRLWHRKQC	50	106	297
MCREIVYYQIFYHC	47	75	285
MCYYKHKYEQQWHWC	31	75	284
MCYYNIQFGYAWWTC	27	64	283
MCYEAVFGYVRYWYC	44	71	283
MCPKYVQFYRALHKC	5	21	283
MCYEIWWYKWQRVC	68	88	283
MCKKEIKYYIIWTC	55	76	283
MCHNSLFYYLHWHKC	45	105	282
MCYAILWYQQQRKC	34	58	301
MCYVFHGSHQYVYWC	27	42	282
MCPVLWYKIHYKLC	71	172	281
MCEIRYWQIWRNKWC	100	165	280
MCVWQYNWQYNWHC	40	72	280
MCEHRHPYQWFWQQC	39	72	286
MCEIVWYKIHKAQC	46	64	280
MCKFRQDVFYYLLWC	36	123	286
MCKFRILQYYRAFKC	68	84	278
MCRHVLYYLIHRGC	37	76	284
MCYNKWVVYWKVAVC	25	62	277
MCHLFYYLQHRKC	25	77	276
MCLLYYKHYLKAKHC	33	108	276
MCYEVLWYKYYYC	73	77	275
MCPHHFYVIWFRRDC	65	130	275
MCHLFYYLHWQRSC	41	66	275
MCHVIWYQIFHRRHC	24	83	274
MCHIHIWWYKVQRKC	41	51	274
MCYEVAYYRIIRQLC	41	79	279
MCFKRVNYHWTIVC	74	152	274
MCYKPYHFFKVLFC	67	110	274
MCLKHLKYWLVYKC	35	49	278
MCYKKEVLYYLLARC	70	134	273
MCWYHKNVVGWVRTC	74	296	273
MCKATDFYGYHYWHC	42	60	273
MCPKLYIRYWQLFC	72	171	272
MCPKSHLFYYLLFC	64	132	272
MCRHLYYWKLFHC	50	100	272
MCDIIWYKIQWKHC	46	60	283
MCKRHLVFWKIFRKC	28	70	271
MCPRHIAYYRAWIRC	48	116	277
MCRRHVFYYRLVHFC	30	71	270
MCWWVTERVFWRRLC	75	197	269
MCTHLYYYKLQKRQC	74	138	269
MCYIPLSSWAFVYEC	30	73	269
MCYTRKPYEINWRAC	46	106	269
MCEIIIYKLLRRC	41	72	268
MCYVKVWWHYYKAKC	57	87	267
MCTYVFTFQNVAVRC	42	84	267
MCHVLYWQILRRAC	50	111	267
MCEHRHKFWTDWLPC	14	48	274
MCGHRHPLESIWHDC	51	88	267
MCAVIWYKIHKGRVC	46	94	267
MCDYAIRWWYVRQC	66	91	267
MCPRHVKYWLVYHC	48	102	267
MCINHVLFYKVVKKC	39	66	267
MCSKQLYYFLLWHKC	45	91	266
MCYEFVFGYVQYC	31	47	266
MCTWLYSQKYNWYC	35	66	266
MCYLHFYRIWNRRC	61	121	266
MCTTRHPYEPRWRTC	64	129	265
MCKRFVQYFRIVRAC	55	94	265
MCDHRHPYGNWQKC	24	32	264
MCYTRHPLGRWHHC	65	155	264
MCYHRHPLETVWLSC	66	120	281
MCPYSSIIWYKIQYC	2	29	264
MCNYNIKFFLLWKC	54	50	263
MCLYVQYYRTWRKWC	58	101	263
MCFTEVLLYKILRHC	45	83	263
MCYHRHPLEVVWRLC	61	94	263
MCKWAVYWKVWRSC	45	106	263
MCRPLAYWFLWHRHC	22	93	262
MCYYKLWYQYQVRVC	58	111	262
MCYHLYYYQVYHRQC	42	93	262
MCKTHLYYYLIYRC	25	85	262
MCHLFYYLHFHRNC	41	50	261
MCFHRHKFSQWLSC	40	56	261
MCRHVYYYILHQRC	44	77	261
MCEYRHPLQSWWQPC	48	79	261
MCYKNWRNAVFVYC	57	122	261
MCHIIIYKVLRSC	59	93	259
MCHVLYYKVWHRKVC	44	93	258
MCSVVWYKIHYKC	75	122	258
MCLKWKFIPHSIYEC	51	98	258
MCLYDIHGNYLRVFC	28	68	257
MCYNVLWYQWRRRLC	5	11	256
MCHRFIYRDFWHC	35	71	256
MCSIIWYKLQWHKC	59	73	255
MCRERYYYLIIRSRC	23	59	255
MCWSTVWYRFARFC	64	168	255
MCHKFLKYWAVWRAC	61	117	260
MCNVIWYKIQKHC	76	127	254
MCNHYVQYYRVWRYC	29	68	254
MCRYVLYYRLQHQC	41	95	253
MCREVYYYGLVVAYC	43	110	253
MCEDLFYYIINRYGC	53	86	253
MCEVIWFKLHKAIC	45	73	253
MCNIVRYYQVWRKC	58	83	252
MCWHRPPFHLQWQHC	40	70	252
MCYHRHIYDKQWRPC	42	60	252
MCVQLFYYKLWKKC	45	72	251
MCYHRHPYQHAWLQC	68	114	251
MCWYYVVTKGWYLC	99	199	250
MCIQKYKPYLFWWVC	55	103	250
MCYLHYYRIWQRRRC	52	127	249
MCERLIVYYKLWHC	47	88	249
MCYTKPRYSYRWYPC	53	88	249
MCHRHKFEIYWHC	18	30	248
MCHIVLYKVLRQFC	46	77	254
MCEQRFVFDQFWWPC	26	74	248
MCLKYVKYYLLYKC	44	80	248
MCLWHYYKIFRRQKC	28	71	248
MCTWIFYWKLQHKC	31	39	248
MCPIVWYKVQWLC	30	66	253
MCDRHLFWYKVWNRC	57	93	246
MCVQYYRAIHRRVC	64	143	252
MCRHLAYWRLWHIC	39	116	245
MCRALFYYRVFRSGC	44	123	245
MCDKYVLLYYKIWC	45	64	245
MCIKAFLLWRKIC	36	82	245
MCHTWYTIPFNYQC	37	78	253
MCDYASIWWYRWQC	36	91	244
MCRYELYYRIWLRC	51	83	243
MCHRHIIYYLVQHQC	32	85	243
MCYWSYWYRYYYKC	54	94	243
MCDYAYYWWYREC	69	103	251
MCRYHLAYYLIAHC	44	67	242
MCYTRHKYEFEWLQC	45	93	242
MCFHVLWYKIARVC	31	73	242
MCKRFITYYLLWKC	30	58	241
MCYTRVYWWEPWLQC	35	83	241
MCHLFYYLVHRRC	34	63	240
MCRHYLYWRLFHHC	34	93	240
MCYWVYWYKYNKKGC	36	83	240
MCKKHVKYWSIYKFC	46	63	240
MCYTRNNHWERWTSC	34	93	239
MCVKAFLLWKGKFC	50	80	239
MCYFHYSTKQLVYC	60	89	239
MCFEIIWYKTIKGKC	23	30	250
MCYTRTYRWEAWQPC	39	58	239
MCFKYLHTGVIAYC	69	169	238
MCEGNFIKYFLLWKC	39	71	238
MCDLFLYLWHRRLRC	46	83	238
MCDVTLYKLLRYC	78	139	237
MCKRYILYWRTFHRC	22	66	244
MCTQFYYYLLERRYC	55	111	237
MCVVYNRQQLVFIC	65	91	237
MCHLHVLYYQILHQC	35	67	237
MCYAVHWFQYQRKC	32	61	236
MCKRAVVYWRVFC	49	96	236
MCYTRKHWFQDWQLC	52	105	236
MCEVIWYKLNWQRC	37	85	236
MCYTKGPYQQRWTIC	58	124	236
MCPIILYKILRQC	61	123	236
MCIKWHFVDSNWRQC	42	116	235
MCYHRHPYWFVWRAC	47	78	235
MCHVFWYRVFHKC	23	60	234
MCREVLYYLIWRQC	52	86	265
MCNKRVLVYYKIWC	39	59	234
MCHRHPLENYWHC	34	64	234
MCREVRYYQVFHAYC	42	88	234
MCNLWLYKVIRYHC	29	84	234
MCTYVHWGNYLKVYC	30	48	234
MCREITYYRLWRAC	63	113	233
MCIYSKDLWLYRLWC	4	15	233
MCNLFYYLQFNRKC	64	108	232
MCKEVAYYFIWRRLC	39	81	232
MCYTRFKFEAEWHIC	30	69	232
MCFKRHLLYYKLQC	70	206	232
MCPILAYKVWFRLRC	62	153	232
MCRELYYYRIWQRC	57	111	232
MCKEYEVLWYKLQYC	7	8	231
MCVWPKWLTKFILLC	34	64	231
MCFWYKTSDFWIQAC	70	105	231
MCFHKRPYSILWHPC	36	43	231
MCFKKILLYWKISQC	45	116	231
MCRRHLVYYLVVRKC	14	42	230
MCDYAYRWWYIIC	46	57	230
MCWKHIIYYKINYAC	38	67	230
MCFHKHPYQQYWQRC	35	61	230
MCVHRHPFVPYWLIC	21	39	229
MCWIYYKESWYLC	53	100	229
MCEWKKHFVYFRVFC	36	62	228
MCHVWLYKLFHRRGC	31	77	228
MCFHVAYYKIWRRSC	35	84	235
MCKAYVQFYKAFHWC	37	51	227
MCYHHPPFYHYWVAC	34	70	227
MCHRRHLYYYRLWC	35	98	227
MCDWKAILWFKIQC	42	53	256
MCEITWYKIAYKC	22	52	227
MCERHVFYYRVWHRC	40	60	226
MCRLVRYYQIHKSC	64	115	226
MCRREILYWKILHHC	76	149	226
MCDIVIYKILSRC	74	96	226
MCNKRLVVYWRVWC	53	137	226
MCNDIQTQWIYWWIC	53	157	225
MCKTLYYYKVWHAYC	71	129	225
MCYEVLWYKVLYC	60	108	225
MCDLFYYRLVRAHC	36	82	225
MCHAYPFESIWYC	40	89	225
MCFHKHPYQWHWSKC	42	40	225
MCERHVQYYRIWAKC	60	122	225
MCNRVLTYYRIWHRC	24	40	224
MCFEYVFGYIYQHNC	40	39	224
MCVVTLYKILRQTC	70	130	223
MCNTHLYYYLILRC	66	100	223
MCKRWVKFYLIWRQC	29	40	223
MCKVHLFYYLLHC	33	63	222
MCHKFVFLDRWHC	31	69	222
MCYVRYYQVFRSFC	24	50	220
MCFRHWLFGQFVYC	62	136	220
MCNRHIAYYLFFRRC	53	78	220
MCWHRPKYGTLWQPC	64	98	220
MCFKALKTGVFVYC	70	149	220
MCKRLTTYYIYWLKC	39	57	220
MCREVYYYLRIRRHC	37	100	236
MCYTREHQFAEWRLC	71	121	219
MCEVLWYKIHYKC	36	53	219
MCYVEFKTGAIVYC	104	165	219
MCDYAYWWWFREC	58	67	219
MCDVLIYKLLWSVC	51	105	225
MCKKFVKYWLVWNC	32	50	219
MCEAKRHIRYYLLFC	49	93	219
MCRHLVYYLTFKRWC	40	58	219
MCYTRHLYQTKWQHC	47	119	218
MCYAKHWFKYIKRQC	44	57	218
MCPRYVRYWQIYLSC	75	182	225
MCHVLIYKVLRC	56	66	218
MCEHRHPYLNHWFIC	26	44	218
MCFRYVHNGTIAYC	85	148	218
MCYYDVHSKVLVYC	37	91	217
MCRALFYYLTFNRQC	57	91	217
MCAKEILIYKIYRYC	25	40	217
MCHEVLWYKVTKRQC	68	94	217
MCDYRIVLYKVLRC	52	65	217
MCHLFLYKLWHKHC	56	95	217
MCDLFYYRLVKQYLC	31	77	217
MCPVVIYKIWRKLC	33	61	225
MCWKKEIKYWLVLHC	31	65	216
MCYVFYPSGRFAYC	78	88	216
MCKKHLHYYLLFHC	54	101	215
MCPHLFYYILHKRRC	42	94	215
MCPRFVVYYRIVHQC	72	121	215
MCYEFVGSWRKIQFC	28	36	214
MCPVLWYKIVWRC	52	93	214
MCPFHWYRIWLRNC	51	100	214
MCHKTLNLILWQYC	87	171	214
MCFVKFYKVLRYC	30	59	214
MCKEYLYWYQWQRIC	74	142	214
MCHEILWYKLTYVQC	42	98	214
MCREVLYYQLIVRC	54	103	213
MCHHLFYYLLHRGC	15	50	213
MCWKDIHWRGFYC	45	49	213
MCDIIIYKILSSIC	23	46	213
MCKYLKYYLTFHAC	52	80	213
MCANLFYYLQHKRC	45	86	212
MCWKEIIWYKTKWC	26	64	212
MCTHRFIFHTNWLRC	46	80	212
MCYVLYWKVQQHRHC	49	110	212
MCNRHIVYYILQRC	60	76	212
MCYTRRHPFDDWQIC	77	100	212
MCHRHKYEQHWHC	27	47	211
MCNVHLFYWLLSQKC	48	76	211
MCRYVVYWKVARRC	28	68	211
MCYTKTYWWQPWAKC	42	72	210
MCYHRHIYDAEWSHC	33	68	210
MCYHRSNHWEHWRLC	48	74	210
MCYWSIWYRWHKIC	48	71	210
MCTNLYYYKLWLC	57	85	210
MCHLWYYLLAHRQC	46	100	210
MCHHLFYYLVAHRC	26	45	209
MCYKDLRTGIFVYC	48	93	209
MCVQLYYYKLFHQC	53	73	209
MCYTRYKFGKWELC	51	68	208
MCDYAFRWWYVVC	40	51	208
MCFLDHLSHVIVYC	52	81	208
MCLWVQYYRVHRAC	35	52	207
MCVHRHPYVGRWFSC	34	65	207
MCEHRHPFEWRWRKC	30	61	207
MCYTVLWYQFQRVC	56	91	207
MCAVLWYKVVKHEC	60	91	207
MCWHRHPLEFNWHHC	33	43	206
MCKQLYYWKLWQRYC	35	82	206
MCKREIVYWQIWC	30	54	206
MCHLFYYRLYWRHC	50	92	206
MCYTRTHIWERWQVC	64	102	206
MCNVIWFKIHRLQC	46	58	205
MCKYVAIYKAYRFYC	42	62	211
MCKLIFYWKLQHRC	17	50	204
MCYHNIFDSRIVYC	48	81	210
MCTWTYNHKYNWHC	48	77	204
MCKTHLYYYLLAYKC	44	107	203
MCYTKSKYDTVWQPC	42	56	203
MCTYEYVLGTFYWYC	41	54	203
MCFHRHPLSIHWSQC	35	46	203
MCFYNYNTKVLIYC	44	91	203
MCFWYKLHFRRHC	51	96	203
MCKYVWLYRWWHHC	30	54	203
MCDLFWYLQWHRWC	33	65	203
MCEYRHPYETTWHHC	37	41	203
MCDAYYVRYWQVLHC	58	67	203
MCYDLAYYLHWHRRC	55	97	202
MCFWIPLSDFHYKLC	52	112	202
MCDIIWYKLQWKC	34	51	220
MCPKYFLLWRNYC	69	131	202
MCYLQFYKVLRWC	116	160	202
MCVYEYIFDTVHRWC	29	40	202
MCNVLWYKITYRIC	49	98	201
MCYKNWFKYGFFWIC	28	62	200
MCHVILWRSWRYC	2765	922	208
MCYVSIYKVLRYC	58	66	200
MCQTWFHFYHTVHHC	30	44	200
MCWHRPPFWKLWLRC	38	73	200
MCRLVRYWQLFNTC	55	97	200
MCWWFKREHFWHQLC	42	137	199
MCHHKHPYASFWLSC	34	36	207
MCERHLYYYLLHC	44	115	199
MCYTVQWFKYQYSRC	42	85	199
MCFYYHHNSVLAYC	38	85	199
MCYPIWIYKVLASKC	34	63	199
MCLHLFYWRLHHKSC	24	75	198
MCKHLYYYLLHRC	21	54	198
MCVKYWLIYDRYLKC	42	44	198
MCETRFNKFEPWAVC	57	95	198
MCYIDWKTGVLKYC	79	130	198
MCYIVLYKLLKVKC	32	40	198
MCEYRHRFQKHWLQC	16	23	197
MCVWEYSQKWNWYC	30	36	197
MCPKYVKYWLVYC	43	142	197
MCEVVLYKIYRKC	27	44	197
MCTHRHKFGVWLEC	19	53	196
MCHYRHKYEFLWHVC	26	56	196
MCFINVLDKRIIYC	47	78	196
MCYTRHWSELSWRPC	52	95	196
MCWWFKQQIYWYRRC	48	89	195
MCWVQYYRVHLRC	37	81	195
MCLYEFTFQELRVHC	33	57	194
MCFHDVSTGVFVYC	57	100	194
MCAVIWYKVQRVC	45	53	194
MCLYEYSLGFEKIHC	50	51	194
MCAVIWFKVQKKC	39	69	194
MCHIVLYKLLRVQC	31	71	194
MCAKILQYYRSWRRC	50	95	194
MCYTHRPFEKYWIPC	37	61	199
MCVNWVLFYKIAHQC	24	63	193
MCVKEWINYSWVYC	27	27	193
MCVFKRHVAYWRAYC	34	69	193
MCWSKLIIKYYLSQC	30	36	193
MCYNWWLDEKIWLWC	45	138	193
MCRHVKYWQIFRTYC	29	63	199
MCFINIVDRRIVYC	55	98	193
MCWWFKLKPFWVQHC	70	147	193
MCAVIWYKVQYSC	50	73	192
MCGREVYYWLLIGRC	45	99	192
MCPVLWYKIQYVSC	72	139	198
MCKYFVRLYQIWRKC	38	35	192
MCWHKYPWSKHWLKC	38	63	192
MCFKRDLIYYRVFC	52	71	191
MCYFHHVTKQLVYC	46	75	191
MCVYVFEPWHHYIWC	34	35	191
MCKHLLYYLSWNKC	36	46	191
MCLIHFFKIVYRHC	5	17	191
MCKEVVYWKIWRWTC	28	58	191
MCNKYVKYWLVFQC	49	74	190
MCLRHLQYYKFWLRC	48	102	190
MCFRRHLLYYFLQC	41	91	190
MCKKYLFLYRVWNKC	35	78	196
MCHVIWYKIARVC	41	74	189
MCNYVHIRYYQIFYC	44	45	189
MCNEILYLYRWFHHC	41	89	189
MCHVHYFRIWRAFC	33	47	189
MCHLFYYKIFHSTC	46	66	189
MCYKHAPFHHLWWWC	61	196	189
MCKKFLYEVLYYKIC	49	49	189
MCAYRHPFQTQWHPC	38	60	189
MCNYHLFYYRLWHC	32	75	188
MCEKIRIIWYKINYC	41	38	188
MCLHWHFYKPNWRQC	38	88	188
MCTYTYIFNEVYVRC	32	38	188
MCKALFYYRYWIKC	26	60	188
MCEKNTQLLYYLIWC	31	77	188
MCKELFYYRLIRRHC	3	16	188
MCTYPILWYKIQYC	14	34	188
MCKEIKYAWIYIHC	32	49	188
MCYLDIQTFRIVYC	49	127	188
MCRHVLYYKIWLKRC	27	39	193
MCHYHPYHWLWVC	34	53	187
MCYYSYTFGYNTVTC	44	44	187
MCYWKYWYRVQYNYC	39	78	187
MCYTRHKFQFHWVSC	41	66	187
MCYVSLWKILQRTC	68	92	187
MCEHRHPYSQYWWNC	18	34	187
MCKLIQYYRIYLSEC	32	55	187
MCVKYVLLWKVARC	53	64	186
MCRHLYYYIRFARAC	30	53	186
MCTYVLWGKELWIKC	31	48	186
MCDKILFLYRIWHHC	34	38	186
MCRELVYYRIWHSC	33	85	186
MCELKYFWLWKQQFC	44	126	186
MCKHLFYYLHFTKC	25	54	185
MCWVSIYKVARFC	41	57	185
MCYTKRSHQDRWRPC	68	86	185
MCEVVWYKIQKGIC	26	32	185
MCTWEYKPEINWHC	41	41	185
MCLRHIQYWRAFNSC	61	111	185
MCYTHRPFENHWVVC	58	69	185
MCPYHIKYWLVWHC	34	65	184
MCHEVIWYKIQFC	55	116	184
MCERVFLYRWLVQVC	71	105	184
MCEHLFYYLHWKRC	26	53	184
MCEVLWYRYIYRKTC	25	43	184
MCYEYVFGYQYLC	36	32	184
MCHLWYYLYWHKC	39	39	183
MCLFWYKQFHRLPC	44	99	183
MCWFYIHGHGWYLC	37	90	183
MCWEVIWYKLQRC	26	56	183
MCHRYVRYYQIFC	47	68	182
MCTYHFVFDSYFINC	40	22	182
MCYHRHPYEHYWSFC	26	29	182
MCYTHHPLEFRWSKC	46	66	182
MCPYVKYYIVFKC	56	81	181
MCKWIQFYRAFKQC	39	44	181
MCKRHIIYYQLVYC	53	74	181
MCEYEFVFGSFTITC	38	47	181
MCEKHLFYYLVWHC	53	88	181
MCPVHWYRIWLRC	51	110	180
MCHWNKHYALGWC	21	31	180
MCQVFSILWYKLQKC	46	54	180
MCKVWFFDRQFYFVC	33	45	180
MCWWIKADHYWYKLC	64	163	187
MCTELFYYLIVRQC	52	77	180
MCAKYFVIWRRHNC	47	75	180
MCKFVYFQWHDWRLC	37	56	180
MCHIRYYQIWRNHC	48	94	180
MCKWQYSRTWNWFC	27	54	179
MCHHYYKYWYRREYC	29	62	179
MCYTRHPYGSWILC	53	101	179
MCRAIRYWQIWRVC	31	69	179
MCFWKHWYKYQYKNC	21	43	179
MCKLILLYKAAYKLC	30	41	194
MCVWKYRLDRNWYC	40	47	179
MCYWSYWYRWQHKC	101	98	179
MCTHKHPFSNRWQTC	35	60	184
MCHWFLYDGQGWQFC	47	103	178
MCTHVLYWRLFHKC	62	96	178
MCFQRHKYQYHWTPC	35	84	178
MCHKYLQYYRVFKHC	37	58	178
MCDVIVYKIWRKSC	33	44	178
MCKEIKYYIVWQHWC	56	52	178
MCRELYYYLLSRC	33	79	178
MCDKLHLFYYLRFC	55	96	178
MCWTKRPDQTRWYKC	39	77	177
MCRRHILYYQFIHRC	27	63	177
MCQRYVLYYLLHKC	28	46	177
MCYIRYWQIVRRQC	128	212	183
MCWFWPYLWIRRKC	30	60	177
MCAVLWYKITYQC	37	53	177
MCKKHVVYWRVWC	67	98	177
MCYINYYRWFHRC	75	105	176
MCLRHVLYYKLWRAC	35	54	176
MCHLAYYLAFRSC	10640	2246	402
MCYTRHKFALEWWPC	39	78	176
MCDEFVFGYHYYWPC	24	29	176
MCKNYWHLWYRYQC	51	86	176
MCPWHYYVIHFRQQC	32	55	176
MCYEVRWFQYRRKKC	28	59	176
MCVRHLAYYILWRKC	32	44	176
MCYIHYITHQFIYC	35	76	176
MCKYVQYYRVFYRC	32	39	175
MCYWQFWYRIRRRC	67	162	175
MCHAYPFYWQYWLC	42	65	175
MCESKIFRWKYWWIC	28	72	175
MCNITLYKILHAFC	32	63	175
MCKIHVHYYRVFRGC	47	88	175
MCYYYFQEAFWILSC	66	89	175
MCEYRHPYQPAWQPC	33	41	174
MCYNVLWYQVIRRQC	3	19	219
MCEWQYSNKFNWFC	31	34	174
MCTYIHYYRVHLRQC	48	75	174
MCFINVLTGVFAYC	63	112	174
MCHKFHLLYYKVFC	35	57	174
MCWVWKDPYFYIYC	37	59	174
MCAKNRLVVYYRVWC	64	105	174
MCPVLWYKITYKHC	89	129	174
MCRHLVYWQIINRKC	29	54	174
MCAIVLYKILRQC	37	71	174
MCKHLAYYRAWLAAC	34	82	174
MCKRHVVYWQILRC	32	64	173
MCLPFKYFWLWQRSC	24	72	173
MCAVIWYKVARVC	40	53	173
MCKRWIKYWNVFTSC	28	61	173
MCTYVLELGKVSVHC	29	47	172
MCNTYLKYYVVWKC	26	57	172
MCVKYLTYYRLWHAC	36	90	172
MCVHRFIFYQHWQRC	34	35	172
MCRLILYYKLHKKC	40	54	172
MCREIVYYLLYTKC	34	65	182
MCVLWYKITKLRC	28	33	171
MCYDKHVFYYRVWC	39	69	170
MCGYKYLRFYQIFRC	22	50	170
MCPYFIKYWLVHKC	23	42	170
MCHKLFLRYYQLHKC	44	60	170
MCHHVLYYRVFHKC	38	69	170
MCGRWVVYYKIHRFC	50	84	170
MCWWLKVHDFWHKLC	35	38	170
MCHVIIYKLLRHC	36	51	170
MCPYFVQYYRALHLC	66	93	170
MCNNIIWYKIQWC	47	86	170
MCNKHLFYYLLVSC	51	83	169
MCTYEFRFQDVTIYC	28	57	169
MCTYHPYKWIWIC	42	50	169
MCLYYYKLWRRNEHC	60	84	169
MCDYWFPHTDYLRQC	24	39	169
MCHLYYFLLHKRC	19	53	168
MCTYRFKFSQHWQPC	27	49	168
MCYVTWYKITKAVC	36	74	168
MCHTRHKFQLKWHLC	28	56	168
MCGWNHRIHWFIC	52	85	167
MCHRQYFLDHWHC	37	73	167
MCEVLAFKVWYRHC	38	46	167
MCNVLWYKIQRLC	41	55	167
MCEVIWYKLQWAIC	25	39	167
MCWWNRNIIGWLRQC	50	107	167
MCSIIQYYRVWRKLC	39	67	166
MCYINIHNGVITYC	62	77	166
MCLYVWHQWSDYREC	52	76	166
MCRYVQYYKIFRSC	41	65	166
MCYYTYTFESVAIKC	25	41	166
MCAKFVVYYRVHRWC	50	47	166
MCYYEYVLGHTNIWC	25	70	165
MCNWPRWLQKYWLFC	40	70	165
MCKKMQLFYYLVHC	52	80	165
MCHSRLVAYWRAFKC	35	83	165
MCAKHILYYKVAYC	47	76	165
MCEHLFYYLVAHKC	24	71	165
MCYRHYLTGILVYC	55	85	165
MCVYEYIFGYRRLEC	51	59	165
MCWHRHPFWNFWHVC	47	59	164
MCRFIFYYKLQHRVC	32	41	164
MCWYWIHGKGWYLC	54	162	164
MCNYIKYWRVWTSC	56	49	164
MCHRHPLQYWWYC	25	57	164
MCRHVYYYILLHKC	27	44	164
MCYVHYYQIWHRIC	45	40	164
MCKLHLTYYLLSFC	34	55	164
MCRYVQYYRIIQSQC	54	64	164
MCLHRHKFWTGWRPC	37	92	164
MCRQLWYYKFWRKVC	29	50	163
MCNILWYKITKVSC	14	31	163
MCKRHVWYYLAFHC	45	60	163
MCHVLYYKVWRSQC	36	70	163
MCDLFYYLIHRYKC	20	44	163
MCKYYIAYYRAFQC	45	55	169
MCNLYWLNGYVAYLC	56	150	162
MCVKEHLFYYLLWC	1	18	162
MCYTRRFWWHRWAKC	44	106	162
MCHKRYVVYYKIWC	46	47	162
MCTTLHYYRIWRKC	48	126	162
MCHRFYYLLWHRDC	56	91	162
MCTHKQPFSNYWQQC	41	61	162
MCEKHLFYYRVWHQC	47	81	162
MCWFYRQADFWIKIC	46	100	162
MCYLSYSTGIIVYC	45	59	162
MCTEVYYWKLVQQYC	44	80	162
MCYIDYVRGIIVYC	72	142	162
MCFMKHPFSYKWRPC	30	43	161
MCWTLYIYKLEQRRC	70	96	161
MCHEVLWFKIKYSEC	27	50	161
MCRWVFYYQINKRRC	14	36	161
MCYHRHPYQHAWHLC	57	76	161
MCYKDVQTGVYVYC	58	110	161
MCVYEIVFNYEFTHC	23	36	161
MCHLWLYLHWNKC	14	46	161
MCYQRHKYQTDWVVC	26	44	160
MCYIDYKTGLIVYC	74	114	160
MCRAIRYYQLFYDKC	61	121	160
MCLYEFTLGRTVIWC	40	65	160
MCYTHGPFQRWWVEC	32	64	180
MCVWSDKIYHFYHLC	34	35	159
MCWWIKQHRWWTKLC	24	56	159
MCDVLIYKLWWKC	33	42	159
MCHEVLWYKVARLC	50	106	159
MCKKLIYYFLLHHKC	20	23	159
MCKFVQYWRIWHHQC	38	46	158
MCYTRAYYDLFWRQC	55	89	158
MCKRHVTYYQIYFSC	44	69	158
MCNKTLYYYYLWHKC	46	116	169
MCYEVYWFKYVYGKC	64	86	158
MCWVKYYIVARHSRC	23	77	158
MCYLDWHTKIIIYC	43	65	158
MCYIDWHTKILVYC	71	99	158
MCPFRKDLLYYFLIC	46	84	157
MCDTTQYRWARWWVC	25	61	157
MCKKQLYYYLLQVKC	50	108	157
MCFLHWQTQQFVYC	56	102	157
MCYLDDFYSYRYWAC	33	80	157
MCFHRHPFWSAWVPC	15	57	157
MCEHKHPFSNFWFKC	20	27	156
MCNIHVFYYRLWHHC	20	37	156
MCYYWQYVYLHQC	39	99	156
MCYVHWYRIWHHC	25	62	156
MCVKRWLTYYRVFC	39	80	156
MCHHFPFQHYWIC	25	51	156
MCEHLFYYLLVKRHC	4	8	219
MCKWVVFYRAFRAC	24	43	156
MCDTNYARYRLWWVC	64	175	156
MCYKYSVFHQWVC	34	52	170
MCWHLFYYKLHRAC	31	48	156
MCHYVQYYRVWRHC	54	92	155
MCHLYYYLIARSKC	105	111	155
MCKNYIAYWRAFC	55	50	155
MCDRKFYKLFFIWKC	55	49	155
MCYEAKYWIVWRC	35	67	155
MCHIWLYKVVRFC	29	33	155
MCHTRRGVWDRWVKC	49	90	155
MCHAYPYSKHWIC	34	50	155
MCSILLYKVLSRC	45	87	155
MCRHLLYYLYTRKC	40	74	155
MCKRRVLAYWRVWC	29	49	154
MCTKLVSYYRIWLKC	36	41	154
MCYVHYYLIWHKHHC	26	36	154
MCVWYYKLFKRRPEC	28	62	154
MCYTNLFYYKLYRRC	59	119	154
MCYDLTLGYAKVYKC	31	47	154
MCYYKYWFQYQKKQC	52	96	154
MCWVQYYRIHRSREC	48	107	154
MCQLYYYLLFKRC	26	64	154
MCYVFVHTEPQIYLC	25	41	153
MCREIKYWIVFHAC	28	57	153
MCDHITIAWKHWWIC	38	52	153
MCYAKLWYIYERSRC	30	45	153
MCRYVSYYRIFYSC	43	45	153
MCKTHLFYYLLYQHC	53	90	153
MCYHRHPFEPQWKLC	22	50	153
MCTHRHHFDQYWRQC	50	77	153
MCDLFYYRLFHQC	47	78	152
MCAAEVQYYRIWRSC	59	89	152
MCQFVYTKLWLRYVC	34	44	152
MCFWIRHGPFWGRIC	35	75	152
MCEQLFYYLLIHRVC	32	52	152
MCSRHWKTAAFVYC	4	15	152
MCYSNLWYVYQRRVC	40	51	151
MCKHQRTLWLWRVWC	39	71	151
MCKNWIAYWRVIHAC	53	100	151
MCFQPILWYKIQYC	29	47	151
MCFHDIHTKIFIYC	58	56	151
MCYVKEWYAYQRRHC	48	69	151
MCERSIVYYLIYRGC	32	43	150
MCTHRHKYWQHWHEC	37	52	150
MCQFYKIFQRRLHC	33	42	150
MCLHLYYYQLYNRNC	34	63	150
MCYYYYSTQVLAYC	36	121	150
MCYVHHVSGQIVYC	45	35	150
MCDKLHLYYYLSWHC	20	53	150
MCPYVKYWVVWHQC	42	54	149
MCRHILYYQLFHC	49	102	149
MCFVQFYRAFHKQC	63	85	149
MCKRAVVYYRVWKC	38	40	149
MCNKFIRYWQLFHTC	38	51	149
MCKFNTYLQYYRAFC	39	57	149
MCKRHVQYYRILWC	47	68	149
MCYTRGYYDRWWQDC	55	80	149
MCFKTEFYGYKYHNC	29	54	149
MCIGRHLYYWKLFHC	3	21	149
MCGRYVFYYQIFHC	62	66	149
MCKRVYYYLLHKKLC	31	41	149
MCPYIKYWNIWVKC	54	79	149
MCRTWVQYYRLFRAC	56	72	148
MCFHRHLFDQLWQVC	34	54	148
MCREILYYRIWLC	31	58	148
MCHAYPFHHIWIC	25	34	148
MCPHKKWIKYWLLFC	57	72	148
MCYYNFILGYQNIFC	20	19	148
MCHLFYWKLVHRAC	44	82	193
MCLYYYLQYKKYEHC	46	59	147
MCWKEIVWYKIQYTC	24	34	147
MCHLHYYLIWHHC	31	60	147
MCEYRRHLLYWQIFC	56	81	147
MCYTVHWYKYQRRQC	3	12	170
MCHVFWYRVYRRNC	30	72	147
MCKNIYYWKLVQRWC	34	71	147
MCVFWWKQFHRRPLC	36	47	147
MCYSILWYQYDRRC	65	79	147
MCDKYLLYYLVFRAC	20	49	147
MCDVILYKLFYQQC	54	78	156
MCHLVQYYRLVRAHC	41	127	147
MCEHKRVLYYYKLHC	54	49	146
MCKYAEVWWYRHFC	56	93	146
MCHHLFWYRLFHRC	24	37	146
MCNLFVQYYRAYKC	50	70	146
MCHPRWLVKWFLKHC	25	47	146
MCHEHLIYYLIWNKC	28	38	146
MCLVHWYQIYRRC	28	60	146
MCAIIWYKVAKKC	30	28	145
MCKKKALFYYLLHC	27	62	145
MCAIRYWQIWQRHC	61	100	145
MCYLFWYKLHHRKC	25	53	151
MCERHYHVDYSYWTC	26	37	145
MCYTKAPYSTKWYTC	35	37	145
MCRRHLVYYRLWHC	26	47	145
MCYHRHQFQQQWSYC	32	53	144
MCYDFTGTYREVYWC	28	56	144
MCVVYYKIWHRKNWC	36	25	144
MCHVHWYQIWHRHC	46	57	144
MCREVSYWLLWKRYC	30	56	144
MCDVIWLYKIIRYC	32	46	144
MCKHLVYYKLWLRWC	17	48	144
MCNFRHIRYWQVYLC	63	125	144
MCYTRAYWWERWKQC	52	112	144
MCFWKQWYQYHRKC	24	51	144
MCKRHFVYWKVFVC	28	57	143
MCLVSIYKVLRSWEC	67	128	143
MCYYEFTFTDVAYVC	32	43	143
MCYEYLWYVYQHKC	36	74	143
MCYHLFLYKLVHSC	44	58	143
MCPKSVLLYYKIWC	51	76	142
MCLRHIAYWKAWSC	63	88	142
MCTHRHPFELYWAIC	31	49	142
MCPYVLYYIAFHKC	37	52	142
MCKVPYVLLYKVLYC	51	71	142
MCSKREVVYWNVWRFC	3	18	142
MCYKNLANGVILFC	74	148	142
MCRLVQYWRVWRKC	51	103	142
MCHIEYVFGWEYWKC	15	38	142
MCYTRKHLWEPWQQC	44	58	142
MCFHEILWYKIAWSC	28	55	142
MCYKSHWSQFWYC	36	74	142
MCFRYIHSGVYAYC	46	67	142
MCFHDWFTGRIIYC	43	98	164
MCYHRHIYQPRWAQC	45	66	142
MCHLWYYKLYRRHC	35	62	142
MCDKHVKWYIIWRFC	32	38	142
MCRELYYYILHVRC	21	36	141
MCFHRHKYQNFWIYC	28	48	141
MCDLFWYLWLHRERC	36	66	141
MCKRHIFYWQLWSKC	45	85	141
MCFQRHKYALHWREC	28	48	141
MCHVFYYLQFHKC	51	45	141
MCKTQLFYYLLYTSC	65	94	141
MCYWKHWYVYQRKC	42	59	153
MCYTREPFVLHWKHC	62	62	141
MCIEYEILWYKLQYC	2	5	141
MCYTRESKFHKWQQC	37	58	141
MCTHWVLWYKLDKVC	36	57	140
MCYHRFKFDTAWSLC	28	65	140
MCERLVIYWKVAHQC	84	158	140
MCRHLAYYYIWQRC	32	45	140
MCNFVRYWQVFHRQC	46	74	140
MCPILWYKVQKKC	22	45	140
MCAKYFVIYKEYLC	41	52	140
MCFHRHHFEPEWHLC	27	42	140
MCDVIAYKIIWKC	42	52	140
MCKYVQYYRILRSSC	44	76	140
MCYTRHKFIHYWSPC	38	69	140
MCQVLIYKIYRHC	28	37	140
MCEYTFQLGAAYIYC	23	37	140
MCKLFYTYYRTFHKC	26	57	140
MCYHRHPYSLQWFVC	31	36	140
MCKWQYSAVWNWFC	31	42	140
MCLERYYYLLYRRDC	54	140	139
MCLHRHIYEHRWQSC	35	77	152
MCKIGHFFGFYYHVC	32	32	139
MCHAYPFHWTVWHC	18	40	139
MCREVLYFRVWRRKC	53	95	139
MCWVLYYKVAKSC	35	51	139
MCVITLYKILRHHC	22	42	139
MCNIVLYKLLHKWC	31	66	139
MCKYVLFYKIWQSC	58	62	139
MCHVWYIERAFRWVC	63	102	138
MCWDLFYYLHWRKIC	38	60	138
MCYHRYNYYEKWQHC	41	49	138
MCRFIFYWKLQHRC	26	39	138
MCWVTIYKILRQHPC	47	50	138
MCDFITLYKVLYC	62	83	138
MCYNHLWYRFIYRKC	24	40	138
MCFNVLWYKLRYC	39	59	138
MCHWKLWYRYQIRRC	45	82	138
MCDLFWWRLYKRQVC	16	73	138
MCYDFEGNYLALYWC	24	26	137
MCYSVLWYQYLHKC	19	35	137
MCWHRPRFSQNWYHC	43	62	137
MCEITIYKLFRRC	36	40	137
MCYEYVFGFTHKYHC	29	26	136
MCYSLLWYKYYRKC	33	54	136
MCHWQYSQKYNWFC	16	39	136
MCYHKHPLEKLWRSC	41	54	136
MCDWEILFYKILYC	37	45	136
MCVHRHPFSAIWHVC	27	25	136
MCEREIVWYKVLYTC	39	61	136
MCRVLYYYHLWHKC	28	34	136
MCKVLFYYQLWRKC	28	43	136
MCDYAFVWWYKHWC	26	28	136
MCYVQYYRSFYRHC	63	70	136
MCFTKGKFEHIWRTC	56	51	136
MCEIDRHLFWYLWWC	45	62	136
MCYIEYILGYQLWRC	33	31	136
MCYFKRHLLYWKLWC	23	52	136
MCPTYIKYWTVFHC	32	90	136
MCRWIRYYQLFHRC	34	50	135
MCDIIIYKIRYKQC	44	76	135
MCKSRALLYYKIWC	47	63	209
MCFHRHPLQPHWHFC	24	44	135
MCEHRHPFDDRWSKC	23	34	135
MCYAINWYRYLNRRC	31	14	135
MCHYYPYSWLWIC	24	28	135
MCYYIFTGWHQQVYC	27	46	135
MCYLRYWQIQHRRRC	21	75	135
MCEFPRFFLNYLAC	23	59	135
MCDLKYYLLWHRRC	64	119	135
MCYVLWYKYIRRQC	30	47	134
MCDIIAYKVVRRWC	23	54	134
MCYTRRYWWHPWRPC	46	68	134
MCARFVRFYQLYHSC	29	41	134
MCNKYVLFYKIWC	43	54	134
MCYTRINRWHSWKKC	39	64	133
MCYFTWPQKVLIYC	40	80	133
MCERHLFYYRLFHC	13	27	133
MCYYNIKSSILVYC	53	95	133
MCYHRAPFQKLWFNC	20	28	133
MCTHYLKFHITGRHC	29	37	133
MCYEIVLYKVLKHC	28	46	133
MCNKAIALYKVWYKC	30	28	132
MCKFAKYWVIWRSC	28	56	132
MCKPLWYWNWTAFEC	24	31	132
MCKYVQLWRAFHQC	49	63	132
MCYTRRPYAKNWQVC	67	82	132
MCVYEYVLSSTYLHC	26	36	132
MCYLHYVTKQFVYC	52	84	138
MCPYSIVWYKLQWC	42	52	132
MCWWVQSWHHWIQLC	49	79	132
MCLFWYKYWHRQPC	42	80	132
MCEHHYPFSLFWLSC	35	44	132
MCYTKGPGQHRWRLC	43	60	131
MCEYNFLFSEIYIYC	23	21	131
MCPKFVKYWIVHVC	50	70	131
MCYHRQPFSLHWRLC	25	45	131
MCRALYYYRLWHC	14	39	131
MCLVYYLLERRYHHC	36	82	131
MCPVLIYKILKSQWC	36	89	131
MCYTRANQWSEWHKC	48	62	131
MCHLFWYRWWHRLC	41	88	131
MCKHWVQFYRAWKSC	34	35	131
MCYTRYYNQPWYPC	35	102	131
MCHYEYVLGFQFRWC	34	48	131
MCPITIYKLLRFYC	34	72	130
MCVWKKRQLYYYLLC	54	54	130
MCPYDYYDWHDWRDC	50	90	130
MCEFRHRFEADWKVC	16	27	130
MCPVHWYLLHVRRQC	42	87	130
MCKHLHYYLIWRQC	24	50	130
MCHKYPYSWHWIC	41	55	130
MCYVYFPSGIYAYC	47	65	129
MCYKYTKYHQWVC	18	30	129
MCEVVLYKLLKHC	37	39	129
MCEVLFYKIYKKIC	25	29	139
MCEVLIYKIWRTFC	23	32	129
MCFKHYYSGVFVYC	23	33	129
MCWHWHPYVQILHHC	35	39	129
MCKWLVYYKVARLC	39	62	129
MCYAVQWFKWEKRLC	42	64	129
MCQRHLVYYLLVHKC	38	93	129
MCYVHYLTKQLVYC	1	7	129
MCDHWIVWYKINWQC	35	63	129
MCLHRHPFDLYWHNC	21	40	129
MCPIVWYKIWKQAC	39	58	129
MCHYYSLWRYNRLC	47	72	129
MCKYLWYYLQWHKC	23	36	128
MCLYSWHNYHDYRTC	48	59	128
MCQLYYYLLNRAYC	49	60	128
MCGRYVQYYLLFRGC	35	58	128
MCYAKYWYAWQRFC	41	42	128
MCPYIKYLTVWKAHC	51	71	128
MCWHRPRFQLYWRSC	64	114	128
MCWHRPKFASYWLRC	50	61	127
MCDKRYVIYWKVWQC	37	57	127
MCYDKFIFLYKASYC	24	32	127
MCSKFVKFWNIWRHC	31	42	127
MCPVVWYKIIKSIC	62	87	127
MCPVHWFLLFKRKC	25	46	127
MCYHRRPYETAWHHC	50	57	127
MCYYTITLGYNQWQC	26	42	127
MCSINEIIWFKLQFC	21	25	127
MCVWQYNRFINWHC	41	33	127
MCKFANFYTYYYWEC	25	19	126
MCPHHFYIIWRRRC	43	75	126
MCKRLIQYWRIHC	41	72	126
MCYTRRYRWDDWHHC	47	86	126
MCFDKFIIKAFLQLC	63	62	126
MCGKYAKFWVIWKHC	28	76	126
MCDKYVKYWLAFVQC	40	49	126
MCREILFYKLLRHC	74	96	126
MCYHRHPWELYWHPC	23	41	126
MCWHYKLSAFWVKVC	41	80	126
MCKNLFYYLVWKSC	53	63	126
MCYYYVQFDQYGWFC	35	38	126
MCAAVKYYVVFRQFC	43	56	132
MCHIVYWKVWHAHC	46	63	126
MCRFVKYWQLFRHAC	31	44	126
MCEVLWYKIAKLC	17	51	125
MCFLKYYKIIRYC	27	33	125
MCYEFLFGYVFNC	31	48	125
MCYHRHRYQKEWVIC	24	37	125
MCRPVFYYLLWQRDC	45	114	125
MCYLDHHSHVIVYC	50	74	125
MCELYYYLQIRRHLC	26	80	125
MCREVVYYRAWVRHC	37	54	125
MCWYVQYYRAFKHC	40	61	125
MCYTRHIFQTSWHHC	47	60	125
MCYHRENIYTLWRSC	34	77	125
MCYTRHPFHLKWHNC	21	42	124
MCKRYIQYWRIWC	19	73	124
MCRRELFYYRIFHQC	55	86	124
MCQRHVLYYKVWLC	52	64	124
MCYEFNYVDWPYPC	29	29	124
MCVHLFYYLLVKRQC	2	8	124
MCWHRHIYDRGWHHC	34	53	124
MCKYIVYWKAFRQC	31	51	124
MCYTRHPLEFEWFVC	41	76	123
MCHKRHVLYWLLWKC	16	43	123
MCKYGRELLYWKLWC	38	57	123
MCERFVKYYLLYKC	27	49	123
MCHLYYYKLYHARC	32	79	123
MCYAYHWFRVQYSKC	37	28	123
MCTYVHYYRIWHQWC	42	46	123
MCDWIAYYKVARLWC	15	30	123
MCFHHRILHYYKLWC	29	34	123
MCWFTTLYRFARWC	26	53	123
MCFIHWHPDYQYLQC	22	45	122
MCDKFAILWYKLERC	20	33	122
MCHVVLYKILRGC	57	80	122
MCEHWYVFVHTIRPC	30	33	122
MCNKHLAYWRIWHHC	17	29	122
MCSHNFKTGVIVYC	4	26	122
MCNLQYYLIWQRFLC	36	72	122
MCFVDIRNSVIIYC	49	76	122
MCNKRWVRYWQVFC	24	47	122
MCYWVFWYRQQRRYC	36	56	121
MCEHLFYYLLVRRQC	2	4	121
MCDRHPYAIFWNC	29	30	121
MCYTRQGYWDKWSVC	54	65	121
MCKFVKYYTIWRSHC	37	36	121
MCHVLYYRVFRRKC	49	80	121
MCHLFYYLQHTKRYC	33	64	121
MCVLRFHPHYSYHEC	37	31	121
MCYAYLWYRLQYKHC	22	40	121
MCYYNYRDKTLVYC	102	145	121
MCEREVKFWIVWHC	42	59	121
MCYVRYWYQWQRKC	54	54	121
MCHHHGPYQFFWLPC	14	29	121
MCTYIFQFHDAFVWC	33	46	121
MCYTKYPWSNYWRQC	32	48	121
MCFHKRPFEPNWHHC	27	39	121
MCDRHVYYYILWRC	31	44	121
MCYAYHWYIFQRRKC	23	20	121
MCIIILYKIMKNRC	4	6	120
MCQHLFYYLHAHRHC	41	75	120
MCHYAEILWYKIQRC	31	25	120
MCPIHVKYWYVFRYC	21	42	120
MCGPRQLLYWLIYKC	21	50	120
MCTDLFYNWSLQC	45	55	120
MCRHLVYYKLHLSC	43	79	120
MCAVKAYVVWRRLC	71	103	120
MCYTRHPYGNWKFC	41	70	120
MCYLFYYRLYHKC	35	43	120
MCAVLWYKIQKNC	45	60	120
MCEIIWFKIQYGNC	29	29	120
MCWEVVWYKVQQRRFC	37	71	120
MCHEVLYYKILRIC	40	60	120
MCNREVFYYSLIYSC	53	70	120
MCPRSIKYWIVFKC	39	81	120
MCERHLWYYLLYVKC	26	28	120
MCDKRLVTYWKIWAC	60	101	120
MCYYNFYDGRIIYC	56	79	120
MCWPSWLQKFWLHC	47	73	120
MCEYVFTLGLLSVQC	19	44	119
MCEHHFPFQQFWQQC	30	30	119
MCHRHLAYWKVVHHC	15	65	119
MCFPNHVIKWFLQSC	50	58	119
MCPWQFYKIVRRWC	66	151	119
MCEHRHPLQYRWWEC	32	40	119
MCRRLAKYYWVWKHC	33	64	119
MCWHRHPYDQEWQHC	40	54	126
MCDRHPFQSWWNC	15	28	119
MCWDVILYKILSRC	19	26	119
MCNRYILYWKVYNKC	39	41	118
MCRVLAFYKLWLRC	15	30	118
MCYKSIKDHRFIYC	44	51	118
MCLRLVQYYRVFC	21	69	118
MCIHEYVLGHHYIYC	33	33	118
MCRALAYYKIWKKC	15	30	118
MCQLFYYILHKKREC	32	61	118
MCREIVYYKIWSSWC	50	59	118
MCHVWYYRLHLKSLC	60	81	118
MCKYVYFYLLHQKKC	28	30	118
MCYHRPHNRSKWLKC	44	55	117
MCWVMYYRIAQRRC	37	66	117
MCDWEILLYKILWC	29	35	117
MCAVQFYRAFHRKC	28	32	117
MCFHRHPYHQLWAIC	31	46	117
MCPYYVQYWRVFC	142	122	117
MCNKFVRYWQVVHHC	41	47	117
MCRRWLYYYLLNRC	21	44	117
MCPIWIYKVLRKHC	43	68	117
MCYYEFRLGFNYYFC	16	25	117
MCYTKAPYAKIWQRC	28	37	117
MCHKKQLLYWKIWC	45	81	117
MCAKYYIVWRQFC	28	35	116
MCYTRYNVWEYWQLC	38	43	116
MCRFVGYYRIIRAYC	24	39	116
MCHKGPSTKWRWVC	43	80	116
MCNRYVWFYKIFKKC	23	32	116
MCDIVVYKVLHRLC	24	36	116
MCRHYVKYYTVFRHC	26	56	116
MCREILFYKVLRC	39	48	116
MCNKHLFFYLLHHC	26	46	116
MCEHLYYYIIWRHKC	22	40	116
MCERWIVWYKLQYC	26	39	116
MCLYEYVFQDLRISC	43	39	116
MCIKAYLLWRKQFC	57	82	116
MCTHRHPYVQLWHWC	20	47	116
MCHWKHIIWYKINWC	22	18	116
MCLWYYKQFHRKC	41	44	116
MCDVVLYKVLYYQC	52	59	116
MCPRFIKYWLVWQC	34	66	115
MCVDSISQWHYWWIC	45	64	115
MCYHRHKYGNAWLVC	37	57	115
MCVYEFTIGSFNWYC	20	28	115
MCFKDWDTGVFIYC	45	76	115
MCIKEIIWYKLQRIC	1	8	115
MCFHRHPYQSHWQQC	24	37	115
MCTYHPYAWIWLC	28	35	115
MCQIWYFSRAFHWVC	26	39	115
MCYNVLWYQVIRRRC	0	6	115
MCDIIWYKLQRYC	44	59	115
MCHLFYYRLFHWC	25	37	114
MCHKYPFSVRWIC	31	49	114
MCTHRHKFGPWISC	26	51	114
MCYHRHPFKLHWSIC	13	21	114
MCREVFYYRIARFYC	52	77	114
MCVWQYRPWYNWHC	34	44	114
MCYYTILFDYSHVVC	29	30	119
MCPYVKYWIAYRC	29	45	114
MCAVYYYLLHRQSC	33	82	114
MCHLFYYLLHQSTKC	22	41	114
MCNLYYYFLYRKQC	38	52	114
MCDQWIKYWVIHRYC	40	41	114
MCYHSHPYSKLWLPC	17	18	114
MCPRHHLLYYKLYWC	42	106	114
MCNRHITYYQVWRAC	39	69	114
MCHHFPFHFTWYC	15	28	114
MCHTRAPFELYWHQC	37	50	114
MCHLYYYKLIQRQC	75	143	114
MCFHKQPNWDFWILC	43	62	114
MCNRLVYYYKLYTKC	34	52	113
MCRYVQYYRAVRQQC	48	85	113
MCTVKNQWAHWFIC	61	48	113
MCKRQVLYYLLFC	29	39	113
MCREYIYWRQWLRC	36	69	113
MCYTRGYYQRLWKVC	37	54	113
MCKAVWYYRIWRSLC	42	63	113
MCRHVQYYKILHRQC	22	71	118
MCDKHLLYYLIIHQC	38	57	113
MCSIWYVHKEFYWVC	53	82	125
MCWHLIHPDYQYTLC	49	85	113
MCNVKYFLVWKAYQC	50	97	113
MCSVIWYKIAYGHC	22	53	113
MCFHRHIYQQFWFQC	17	37	113
MCKVLHYYRLWIRQC	9	23	113
MCHLFYYKLHLKC	43	52	113
MCWWIRLHDFWHEVC	56	75	113
MCFHRHPYRPYWETC	24	32	112
MCHVFYYKLIYRHC	28	49	112
MCYTILWYKLQRKC	22	38	112
MCYHHWQYGYIIYC	60	122	112
MCRHVFYYLLHKHVC	24	33	112
MCWWKRLHNFYVQIC	37	36	112
MCTHRHIYAPLWQRC	41	98	112
MCYTKVPFSIYWSIC	23	20	112
MCHLHYYLIYHRLC	43	64	136
MCQLFYYLIHRRC	33	51	112
MCWKDFNWRGFYC	21	21	112
MCFTKKPYSKFWYQC	26	29	112
MCKFYVQLYRAWC	29	41	112
MCTHRHKYEVYWRQC	35	59	112
MCYTRYTVYHAWYPC	69	91	112
MCKREVIYWRTYKWC	53	51	112
MCHHFPFQNVWLC	21	36	112
MCYNYLVYYKAFHHC	48	54	112
MCTHRHPFDNYWVIC	36	57	112
MCWTIVPYYWRIC	27	35	112
MCYTKHKFQTEWQVC	32	47	123
MCEHRSKFDTVWHIC	19	34	112
MCQHLVLYYKVAWKC	9	18	111
MCNTHLFYYLLYC	53	75	111
MCYKHWSTGVLVYC	46	74	111
MCPYAKYWVIWRQIC	34	53	111
MCYNVLWYQWKRRQC	1	9	111
MCHKRLFLYYLLHC	27	46	111
MCWVYYYLLHKRC	21	36	111
MCWKKHFVYWRVFC	26	62	111
MCRHLAFYRIWRHC	19	52	111
MCRWIQYYRVIHKC	27	43	111
MCEIVLFKLLKKRC	23	22	111
MCFRHWKYSYYVYC	35	67	111
MCTHRHRFREFWEVC	40	42	111
MCHHFPFSYRWIC	27	39	111
MCEHKYPHSNKWLTC	33	40	111
MCFWIRNTIGWHKLC	28	50	111
MCYHDWRSGVIVYC	54	93	111
MCKVHLIYWKLVHQC	47	62	110
MCPVLIYKLWRRC	72	108	110
MCFHKQPLWTFWVPC	31	65	110
MCPIWVKYWTVYHHC	50	83	110
MCFVHYYRAFHRVC	37	51	110
MCTYKHRFELHWHFC	29	27	110
MCKRYVKYFIVYKC	30	36	115
MCVRHLYYYRLYRQC	31	45	110
MCEREILYYKIWHC	49	58	115
MCNRRFLTYWRIFC	47	51	110
MCPYHYYIIWRKYC	20	44	110
MCYHRSKYSNIWQLC	19	36	110
MCPYVKYWVIYKC	59	37	110
MCSVTIYKILYKC	38	52	110
MCWKNHIAYWRVFHC	29	62	109
MCYWKYWYVWQRAC	37	52	109
MCYYTILFDRQWVVC	20	24	109
MCVYIWNHQSFAFC	21	25	109
MCYTKRPYSWKWHKC	36	31	109
MCNRHVKYWIVFHC	38	53	109
MCHYVRYYQVWRIC	29	42	109
MCYTRFNKYQRWVLC	37	71	109
MCAIIWYKIARRC	23	25	109
MCHTTLNLILWQWC	40	78	109
MCKYYVAFYKAFKC	40	38	109
MCYDLVYYRIWRKC	54	64	109
MCFNILWYRYQERQC	57	43	109
MCAEVLFYKVWRAC	32	42	109
MCRWKIYYQVIHRQC	20	72	109
MCNLWYYLLHLRAC	51	75	108
MCFEYVFGYVQFC	23	24	108
MCHLFYYKLFRAVC	12	49	108
MCYLKWYKVVRFC	25	56	108
MCLYEIVLGQTAIWC	38	29	108
MCKLYVSYFRAWNKC	47	35	108
MCNVTWFKIQWKC	44	59	108
MCTEVYYYKLWLRC	48	54	108
MCAKYFLIWQARWC	45	62	108
MCYTRHKYQADWYSC	34	68	108
MCVWKYHPWRNWYC	26	28	108
MCHLQYYRLWLRHC	30	95	107
MCYTLFLYRQWHRRC	38	43	107
MCRHLAYWRLFNWGC	67	102	107
MCFHRHRYHFHWRAC	15	30	107
MCPYLRYYLIYRKFC	38	62	107
MCNLFWYQFYHRQC	51	87	107
MCEYEFLFGDLIVAC	18	30	107
MCHVKYFVIWKQLC	33	36	107
MCYVTYTLGHVYWQC	33	40	107
MCDYIYYYRWFHHC	30	34	107
MCYEYLWYRFSRKC	32	44	106
MCTEVLFWKIIRKFC	12	18	106
MCYTHEVLWFKLQC	81	167	106
MCYKHIRYWQIATKC	37	58	106
MCYKRYLTYYLVYC	41	60	106
MCIHLYYYLLWKKC	1	8	106
MCKFIWLYKVLKYC	18	25	106
MCEKYILFWKVARC	28	41	106
MCRHVLYYRLIQQFC	44	57	106
MCNYILFYKIARIC	33	41	106
MCQRLVLYYRVYAKC	43	64	106
MCYTRHPLDFFWRPC	86	123	106
MCNYYWQFVFEHQC	55	76	106
MCFHRESIYSLWQKC	27	31	105
MCHLFYYLHWLKSNC	29	24	105
MCEVLWYKFQRRQHC	38	60	105
MCEVIWYKITRGC	32	54	105
MCEVVWYKVVKQVC	26	53	105
MCHRLVQYYRAQHHC	46	56	105
MCEHWIKYWLIHRYC	33	45	105
MCERFIQFYRAIHIC	28	31	105
MCWVQYYRVLKRQC	42	49	105
[truncated: 15,779 more rows]

## Sheet: T18_2 selection FGF-R4
Sequence	FGFR4_read_R2	FGFR4_read_R3	FGFR4_read_R4
MCFWHKRSDFWLQFC	217.0	792.0	21954.0
MCNKHLYYYLLFKHC	161.0	621.0	18086.0
MCFHIKANYGFVRVC	99.0	460.0	10333.0
MCYYNINSGVIVYC	132.0	515.0	9054.0
MCTDLYYYLIWQRYC	137.0	461.0	8666.0
MCYNVHWYRWIRRRC	70.0	370.0	8449.0
MCPRYVLYYKLFHHC	189.0	673.0	8329.0
MCYVQYYRIYRSRGC	119.0	529.0	8019.0
MCNDLFYYLLWRKAC	82.0	316.0	7464.0
MCKRAVLYYLIHRHC	89.0	305.0	6595.0
MCDIVIYKILRSLC	103.0	298.0	6441.0
MCKRHLFYWQLVHKC	70.0	333.0	6390.0
MCYEVLWYKLQRKHC	86.0	362.0	5837.0
MCEREFLYSYLLQFC	96.0	368.0	5650.0
MCKRHILYWKLWHVC	57.0	232.0	5530.0
MCDNRRWVRYYQIFC	67.0	355.0	5345.0
MCDTNFNRWGLWWIC	108.0	333.0	5276.0
MCYKNVKNGLFVYC	74.0	285.0	5558.0
MCGRHVLYYRILRSC	66.0	273.0	4936.0
MCWWFRNHKFWQQIC	76.0	277.0	4668.0
MCDHKRHLVYYLLFC	85.0	294.0	4737.0
MCLKYVQFYRALHKC	75.0	279.0	4467.0
MCYNKFITLYKVLYC	60.0	215.0	4412.0
MCHYSWNIYQHVWQC	96.0	372.0	4444.0
MCHRHLVYYLHHLRC	80.0	337.0	4202.0
MCKRHITYWKLWHFC	52.0	209.0	4062.0
MCNWPLYYYRIYKHC	52.0	216.0	3949.0
MCKHLFYYKLIRKAC	36.0	149.0	3954.0
MCKQLYYYKLWLRQC	58.0	171.0	3948.0
MCREVFYYQLIHRLC	122.0	377.0	3974.0
MCHDYIVFYKVLRHC	65.0	304.0	3909.0
MCRRELYYYLLYSKC	99.0	358.0	3813.0
MCEYHNWFEYKYRYC	67.0	216.0	3758.0
MCKRFITYWKLFHKC	50.0	118.0	3712.0
MCHNKYLYYYLLYSC	67.0	318.0	3645.0
MCKRHLYYYLLSRSC	33.0	159.0	3644.0
MCYKRDLFYYLLSIC	92.0	327.0	3540.0
MCRDLFYYRLWFRRC	60.0	169.0	3493.0
MCKHLYYYLLVKKHC	33.0	105.0	3415.0
MCKIWYIEHQFYWVC	64.0	180.0	3394.0
MCEVWYFDGHFYWVC	107.0	349.0	3387.0
MCRWVKYYQIVHRQC	79.0	296.0	3310.0
MCKYSKDLWLYRLWC	59.0	228.0	3185.0
MCHLFYYKLIHRKWC	78.0	267.0	3231.0
MCKRHVLYYLLFKHC	43.0	153.0	3131.0
MCKEILYYKIWKRWC	50.0	204.0	2996.0
MCVDLFYYKLFRKLC	62.0	168.0	3079.0
MCPKHHLFYYLLWSC	58.0	251.0	3028.0
MCYNVLWYQVIRRHC	52.0	252.0	2904.0
MCKFKRDLRFYQIFC	60.0	153.0	2857.0
MCPKYVLFYKIFKHC	56.0	254.0	2809.0
MCENKKVLFYYLLWC	66.0	177.0	2752.0
MCYKRDLYYYLVFKC	48.0	143.0	2716.0
MCFKREVVYWNVWRFC	36.0	156.0	2684.0
MCYTELWYKYIRRHC	60.0	220.0	2665.0
MCKKRTLYYFLLHRC	44.0	175.0	2559.0
MCFKQHLFYYLLQC	45.0	137.0	2539.0
MCFKRDLLYWKLIQC	49.0	221.0	2540.0
MCYKDLYYYLLVHKC	40.0	190.0	2512.0
MCYDLYYYKLVRRWC	74.0	246.0	2484.0
MCNRHLVYYKLWHQC	48.0	249.0	2460.0
MCYDVLWYRYRYKQC	70.0	300.0	2483.0
MCNIWFVDRKFIWVC	44.0	183.0	2428.0
MCDLFYYLQHHKKVC	37.0	165.0	2421.0
MCYEILWFRYQRQKC	66.0	175.0	2391.0
MCTGRHLYYWKLFHC	53.0	261.0	2411.0
MCANRHLFYYLLYHC	25.0	114.0	2377.0
MCPRAIKYWNVYYFC	50.0	203.0	2332.0
MCKEVYYYILWQKYC	43.0	175.0	2284.0
MCRHLAYWKLWHRNC	36.0	150.0	2316.0
MCFKDAFYSYRYYNC	55.0	156.0	2227.0
MCFVVQWYQYQRRHC	62.0	153.0	2239.0
MCREVLYYLVYKRNC	82.0	281.0	2204.0
MCYNVLWYRYQHKKC	48.0	224.0	2253.0
MCKRYIRYWQLYHHC	55.0	147.0	2197.0
MCKKDLFYYLFWRRC	50.0	119.0	2232.0
MCKRHIIYWQLYHSC	35.0	177.0	2456.0
MCKRELYYYLLWQC	45.0	167.0	2174.0
MCELFYYKLIQRAIC	46.0	124.0	2115.0
MCDKRHLYYYLLVC	53.0	247.0	2122.0
MCHKHIAYYLIWRAC	60.0	189.0	2126.0
MCHNKALFYYLLVHC	69.0	306.0	2067.0
MCEHKKWIRYWQIFC	49.0	163.0	2051.0
MCDYAAVIWYKLSYC	57.0	189.0	2070.0
MCHDKFITLYKVLYC	49.0	148.0	2055.0
MCRHVSYYLIFNRRC	58.0	199.0	2069.0
MCDRHLFYWKLWHYC	40.0	121.0	2059.0
MCKFKRDLYFYRLWC	42.0	143.0	2084.0
MCDRLILYYRIVHKC	66.0	261.0	1990.0
MCPYEIKYWIVWQQC	116.0	356.0	1999.0
MCYVQYYRVWRSIC	62.0	151.0	1922.0
MCNKYLYYYLLYHSC	37.0	119.0	1907.0
MCEIWYFNHQFHHVC	37.0	100.0	1925.0
MCRYVYYYQLFHRQC	41.0	138.0	1898.0
MCKKHIQYYRIWRAC	69.0	222.0	1932.0
MCDLKRELFYYLLVC	53.0	165.0	1904.0
MCPYTKYWIVWRHSC	88.0	266.0	1885.0
MCRDLFYFLLYKRHC	52.0	120.0	1857.0
MCYKHILWYKIQKLC	48.0	132.0	1830.0
MCDKYWVKYWIAWRC	66.0	210.0	1808.0
MCFWKKLHVFWVKDC	34.0	97.0	1810.0
MCEHLYYYLLSHRRC	37.0	126.0	1800.0
MCREVRYFQIWKAYC	45.0	129.0	1766.0
MCKREVVYWRVYHFC	54.0	117.0	1788.0
MCYDILWYKWQRRIC	102.0	227.0	1747.0
MCKHIKYWIVWHQHC	80.0	221.0	1753.0
MCKRFIQYYRIVHAC	41.0	176.0	1763.0
MCYYNVNNYVLVYC	85.0	245.0	1704.0
MCRYIQFYRVIRRHC	24.0	104.0	1699.0
MCKRFILYYKIAKSC	31.0	125.0	1703.0
MCYNVFWYQWRRQRC	51.0	181.0	1678.0
MCNKRHLYYFLLWRC	20.0	76.0	1682.0
MCAKYLLYYKLWRRAC	30.0	91.0	1702.0
MCDHKRHLYYYILWC	38.0	160.0	1679.0
MCPRLVQYYKVWLRC	76.0	294.0	1662.0
MCWFYKLSDFWVKQC	40.0	142.0	1757.0
MCDFKRDLLYYFLWC	30.0	106.0	1643.0
MCHVWYYQHAFHWVC	59.0	207.0	1770.0
MCPNKDLFYYLLVRC	38.0	121.0	1645.0
MCEYYVSLYRAFHKC	23.0	93.0	1619.0
MCNRYIQFYRVYRHC	82.0	196.0	1598.0
MCYNVFWYQWRRQHC	62.0	197.0	1567.0
MCYYNINTKILVYC	30.0	118.0	1568.0
MCAKHVLYYLLQHKC	45.0	114.0	1567.0
MCFNVLWYQYRYSHC	34.0	139.0	1532.0
MCNRHLYLYLAFHKC	33.0	130.0	1511.0
MCNRHFIKYWIVYHC	44.0	127.0	1538.0
MCKREIRYYQIHRAC	54.0	180.0	1531.0
MCHLFYYRLYHRHWC	61.0	174.0	1502.0
MCLKKHLYYYLLFHC	52.0	113.0	1509.0
MCAYHLLYYKIARSC	49.0	171.0	1521.0
MCKYATLQWYKWFYC	48.0	123.0	1475.0
MCKHQFYGYQYWSQC	32.0	106.0	1455.0
MCNKYLAYYLIWKQC	58.0	174.0	1470.0
MCEHRHPYSNFWILC	19.0	81.0	1435.0
MCKNHFYGYHYWSVC	35.0	110.0	1434.0
MCKRFVVYYQAARSC	86.0	265.0	1424.0
MCKKHLLYYLIFKQC	40.0	103.0	1432.0
MCGRDLYYYLIVRSC	35.0	149.0	1428.0
MCKRRAILYYLLNKC	30.0	167.0	1416.0
MCGRELFYYKLWHYC	48.0	135.0	1415.0
MCNKFVTIYKVLRVC	31.0	135.0	1419.0
MCYKEILWYKVQRTC	30.0	82.0	1401.0
MCPRDIKYYLIWRVC	36.0	169.0	1413.0
MCNTHLKYYLIFRQC	42.0	170.0	1430.0
MCNKHLFYYRAFHHC	46.0	139.0	1389.0
MCASKHLLYWKIFHC	29.0	155.0	1404.0
MCNRDLFYYLLTKHC	32.0	125.0	1376.0
MCRELFYYRFWQKTC	63.0	201.0	1375.0
MCHRHLAYWIAFHHC	55.0	240.0	1385.0
MCYNVHWYQYQRRNC	26.0	102.0	1366.0
MCYNTLWYRYLNRRC	81.0	284.0	1360.0
MCNKALFYYLIHLKC	36.0	99.0	1366.0
MCKIVQYYRVFRALC	35.0	107.0	1365.0
MCKRHLYYYFLVRKC	31.0	74.0	1361.0
MCTYTYVFNQTYVHC	31.0	145.0	1339.0
MCKRHILYYQIVFQC	58.0	227.0	1354.0
MCFWKKTAAFWVQIC	50.0	98.0	1332.0
MCFNVLWYQIQRRRC	55.0	171.0	1337.0
MCNWHVQIWRAFHKC	50.0	113.0	1366.0
MCNTDHYRWKLWWIC	35.0	120.0	1321.0
MCARQLYYYKLFRAC	38.0	103.0	1312.0
MCNHYLYYYLLFNKC	18.0	73.0	1304.0
MCREIYYYQLYIKHC	39.0	122.0	1297.0
MCKYDKILLYYKIWC	41.0	132.0	1296.0
MCKRHLLYYQLILKC	53.0	144.0	1295.0
MCYYYKRSDFWVLRC	47.0	125.0	1287.0
MCEHLFYWRIWRRAC	52.0	182.0	1308.0
MCDRHVLYYQVFRRC	38.0	182.0	1309.0
MCKNHLFYYIVWHHC	66.0	183.0	1272.0
MCYNILWYKLQRRKC	34.0	101.0	1258.0
MCDYAYRQWYKWQYC	32.0	115.0	1258.0
MCKHLYYYLLWTKSC	46.0	93.0	1257.0
MCNWHLFYYRLVKKC	24.0	88.0	1264.0
MCKRYVRYWQIYVAC	36.0	109.0	1271.0
MCPEYVFYYLLHRSC	49.0	146.0	1259.0
MCEREFLYYYLYYKC	29.0	114.0	1256.0
MCKRFIKYWQIWRQC	22.0	95.0	1250.0
MCKVHLYYYSLYRAC	76.0	260.0	1236.0
MCYHVFYYQLYKRKC	36.0	136.0	1231.0
MCDRRHLYYYLLIQC	32.0	97.0	1259.0
MCKFQHDLWLYLRWC	32.0	132.0	1210.0
MCVHRHPFQLHWRKC	36.0	104.0	1221.0
MCKRHLYYYKLSLRC	33.0	108.0	1230.0
MCREVRYWQIWQSIC	39.0	166.0	1201.0
MCWYVQHSFYWERLC	59.0	190.0	1210.0
MCDRHLIYYLISHHC	33.0	99.0	1198.0
MCKRHLIYYILQFKC	40.0	81.0	1198.0
MCKNKFVWLYKAAYC	22.0	98.0	1202.0
MCDKRRVLAYYLLWC	37.0	87.0	1186.0
MCKLVRYYQIYKAFC	25.0	72.0	1173.0
MCLDLFYFKLWHRHC	53.0	156.0	1197.0
MCKIIWLYKAARRFC	33.0	73.0	1179.0
MCRALYYYKIWRKHC	22.0	72.0	1162.0
MCDSDTSWWKYWWIC	98.0	247.0	1154.0
MCRHLVYYKLWRRNC	23.0	92.0	1146.0
MCYEFVFGYVFNYQC	22.0	99.0	1572.0
MCYTYLWYQYQRKFC	48.0	141.0	1123.0
MCNLHLFWYLQQHKC	20.0	113.0	1123.0
MCHLYYYKLFHSIHC	59.0	178.0	1120.0
MCYKEVLWYKIRYLC	35.0	140.0	1114.0
MCYNVLWYRFIKAKC	20.0	86.0	1123.0
MCEHRHPFTQYWLRC	25.0	91.0	1103.0
MCKQHHLFYYKLFKC	20.0	125.0	1096.0
MCRHYIYYLIQHRHC	26.0	92.0	1094.0
MCYWFYYDPGPYQFC	101.0	146.0	1093.0
MCKRHIRYYQLHFWC	39.0	192.0	1148.0
MCEKYVLFWKIYQSC	26.0	135.0	1118.0
MCKRHILYWKIIQSC	27.0	104.0	1104.0
MCTHWHPYIKIVRAC	76.0	199.0	1113.0
MCKHLYYYLHWHRRC	35.0	67.0	1122.0
MCYKSGFYAYRYWEC	47.0	133.0	1079.0
MCKLHVLYYLIHNQC	17.0	68.0	1086.0
MCVQRHLIYWKIFHC	26.0	98.0	1072.0
MCYVDYRNGVIIYC	50.0	123.0	1081.0
MCKYFHVDYQYWYLC	28.0	112.0	1067.0
MCHPRIVYYYLLHRC	31.0	88.0	1063.0
MCVYEYVFDRLTVTC	15.0	74.0	1069.0
MCNKHLFYYLLHYQC	26.0	82.0	1068.0
MCWFYDYRNFRHIFC	45.0	71.0	1073.0
MCRVHFYYLLSQRQC	30.0	103.0	1068.0
MCRELYYYRLWHQC	39.0	122.0	1039.0
MCHKLVHYYRIWRKC	33.0	123.0	1037.0
MCKRLIVYYKTFYHC	24.0	62.0	1045.0
MCYEVLWYKYIYRKC	36.0	108.0	1026.0
MCNNRQLKYYLIWLC	46.0	106.0	1021.0
MCKRHILFYQVFRRC	31.0	93.0	1064.0
MCSVWFFNRKFHWVC	29.0	77.0	1020.0
MCRHIVYYRLWHKSC	37.0	110.0	1019.0
MCPSKRHLLYWRIWC	55.0	164.0	1015.0
MCLYVFELGRTAKWC	39.0	151.0	1013.0
MCWWKKVSQFWLQIC	61.0	141.0	1032.0
MCHKYVQLYRWWHHC	30.0	104.0	1011.0
MCHIHRFYYLLHLKC	38.0	104.0	1015.0
MCKRHLFYWKLIHC	28.0	122.0	1001.0
MCHRHLAYYRAWLTC	37.0	133.0	997.0
MCFPSIIWYKLQRKC	51.0	118.0	988.0
MCKKLHLFYYLLASC	32.0	100.0	994.0
MCTKGHFYHYQYWSC	55.0	131.0	983.0
MCYYEVLWYQQQRHC	42.0	111.0	974.0
MCYNTKYWFTVFDVC	36.0	105.0	974.0
MCKRFVTYWRIYKQC	25.0	108.0	963.0
MCKFKWHEWQDWRSC	20.0	71.0	971.0
MCDKRHIKYYIVWHC	17.0	104.0	958.0
MCEVQYYRIWLAYQC	31.0	94.0	973.0
MCERTLYYWKLFNKC	27.0	118.0	995.0
MCNVHLAYYLIVHQC	74.0	161.0	962.0
MCHKQAIIWYKIQYC	22.0	76.0	946.0
MCFLNIKNGLLVYC	36.0	87.0	954.0
MCFWIKLSDFWHQSC	45.0	83.0	973.0
MCYPKEVLYYKIWLC	55.0	191.0	940.0
MCRDFDIIWYKLQFC	39.0	99.0	939.0
MCDRELFYYLLVHTC	47.0	186.0	932.0
MCERHVLYYLIHHHC	23.0	90.0	927.0
MCHKRHLVYYKYWLC	42.0	158.0	926.0
MCYTRHPFQKRWHYC	48.0	114.0	926.0
MCYKRDLFYYLLSVC	34.0	128.0	1037.0
MCKFDLDLLFYKIWC	35.0	87.0	919.0
MCHVFWYRVHKRQIC	38.0	132.0	909.0
MCYYEVQWYRWRVKC	29.0	103.0	918.0
MCKRFIVYWKINQFC	23.0	83.0	900.0
MCYEVLWYQYWRKVC	32.0	77.0	900.0
MCPYAILWYQYRTKLC	38.0	99.0	900.0
MCPHRHLVYWKIWHC	38.0	138.0	897.0
MCHRYIQYYRAFHQC	81.0	233.0	897.0
MCPKIHLYYYLLHRC	27.0	63.0	897.0
MCLKYIQYYRALHRC	36.0	83.0	911.0
MCKRHIAFWRVWHKC	25.0	99.0	886.0
MCNLYVSYYRAFKQC	27.0	128.0	885.0
MCYTKAYWHEPWRPC	24.0	78.0	883.0
MCEVIWYKIQYRLC	21.0	61.0	875.0
MCFWIKGPFYWHKLC	41.0	75.0	870.0
MCPIHFFKIVYRHC	35.0	78.0	866.0
MCEYWVRYYQVIRAC	46.0	102.0	880.0
MCKKHIQYYLYFRYC	23.0	80.0	879.0
MCPYEIKYWIVWTQC	35.0	115.0	883.0
MCKRHVSYYRIWRKC	27.0	85.0	885.0
MCYWKFWYRYQRSKC	19.0	63.0	846.0
MCHEYHLFYYLLQRC	26.0	78.0	855.0
MCKYAFYGYQYWSQC	24.0	94.0	839.0
MCDRILFYYLLHQSC	38.0	73.0	848.0
MCKRHIVYYRLWQLC	54.0	170.0	829.0
MCDLFYYLFIKRRKC	46.0	111.0	829.0
MCEHRHPYEAFWHEC	14.0	80.0	851.0
MCYVWQYIYENQQIC	50.0	113.0	826.0
MCYKWQFYSYKYWKC	35.0	119.0	826.0
MCYYEVLWYQYLRKC	28.0	41.0	865.0
MCYVQYYRVYHRQC	38.0	141.0	834.0
MCYSYLWYRWQRKLC	48.0	110.0	820.0
MCVKKHLFYYLLHRC	19.0	64.0	815.0
MCVKRHFYGYYYWLC	29.0	74.0	811.0
MCTYDFVFDRLYLYC	17.0	77.0	803.0
MCLYVIDDTVFGVHIC	42.0	77.0	799.0
MCKRAIRYWQLYRAC	23.0	119.0	812.0
MCHFDIIWYKLHRKC	15.0	66.0	790.0
MCEKYLLYYILNRYC	24.0	66.0	789.0
MCNKHLKYLFVWQYC	18.0	68.0	787.0
MCTELYYYLYWRRWC	31.0	73.0	790.0
MCYDFIGSYRRVYHC	28.0	71.0	779.0
MCFKNDLFYYLLHLC	29.0	53.0	776.0
MCREVFYYSLFYRHC	66.0	150.0	775.0
MCDRHVLYYKIWWSC	39.0	111.0	774.0
MCRVWYIEREFYWAC	64.0	185.0	771.0
MCHRLVLYYRAFKKC	35.0	88.0	769.0
MCNRQLVYYLTWRAC	69.0	193.0	766.0
MCNKVLFYYRVWRHC	30.0	91.0	763.0
MCYLDYYTKRIVYC	38.0	132.0	763.0
MCDWVYYRESWYVHC	31.0	91.0	760.0
MCDHTKWFKVIYRFC	27.0	65.0	757.0
MCYEVLIWKVLQQKC	24.0	113.0	756.0
MCKYVQYYRAWRRWC	27.0	84.0	753.0
MCHTWFINKHFYWVC	27.0	104.0	767.0
MCRELYYYLLVRSKC	27.0	71.0	775.0
MCETHLNRWHFWWIC	50.0	113.0	748.0
MCKLYIRYYQAIRHC	33.0	121.0	746.0
MCDHHLFYYLLWSKC	46.0	69.0	744.0
MCPNKDLYYYLLWHC	25.0	104.0	743.0
MCREVLYYKIYRNLC	36.0	131.0	753.0
MCAYHVLYWKLLHQC	20.0	65.0	740.0
MCNRVLKYYIVWRKC	32.0	87.0	735.0
MCYEYLWYRYLLKKC	15.0	55.0	733.0
MCFNVLWYRYQRKEC	23.0	64.0	733.0
MCLVYDQHQNLIFLC	29.0	80.0	749.0
MCKEIIWYKVEWLRC	16.0	51.0	730.0
MCYYDFLFHVASYKC	29.0	91.0	739.0
MCTHRHPYSQIWLKC	33.0	94.0	727.0
MCPKVQLYYYLLYQC	49.0	96.0	734.0
MCREVLYYKIIRTQC	27.0	123.0	717.0
MCEVKRTLWLYLHWC	26.0	80.0	713.0
MCHRFIRFYQIYRRC	17.0	70.0	712.0
MCNLKSIWGYVAYTC	37.0	99.0	712.0
MCKNTYLKYWIVWKC	22.0	76.0	708.0
MCHYYVWDYQHWPSC	23.0	87.0	726.0
MCPKRLIKYWQIWHHC	27.0	72.0	704.0
MCYVVQWYRYQRKAC	24.0	80.0	704.0
MCYTVYWYRYIKRDC	39.0	105.0	703.0
MCYTIHWYQYLRKKC	24.0	89.0	703.0
MCHFKRDYYWYLWQC	59.0	143.0	703.0
MCYKRHLWYYLVAHC	20.0	101.0	701.0
MCDKHILLYKVYKKC	43.0	129.0	700.0
MCDRHLYYYLLTKAC	25.0	85.0	709.0
MCDDYILFYKILRIC	37.0	74.0	696.0
MCYEVLWYRRQRRKC	23.0	79.0	696.0
MCHRNIYYYLLVHQC	24.0	106.0	690.0
MCKLHLYYYLLGHC	33.0	74.0	689.0
MCKEHLFYYLQWHRC	26.0	60.0	702.0
MCKYIRYYQLFHRQC	33.0	97.0	686.0
MCRHLIYYKLWQATC	49.0	126.0	686.0
MCKRHYIYWALFHRC	31.0	66.0	682.0
MCFHRHPFQRRWYIC	53.0	90.0	680.0
MCPHRHLYYYKLFHC	33.0	106.0	680.0
MCYTYLWYQYSRRRC	33.0	93.0	680.0
MCKRHIRYWQLYFVC	16.0	72.0	689.0
MCEKKAILYYLLNRRC	13.0	54.0	676.0
MCVHRHRFEPEWHVC	18.0	61.0	675.0
MCREVLYYRIFQLHC	32.0	96.0	673.0
MCDYAFRWWYLTQHC	33.0	65.0	671.0
MCEHINVLWYKLAYC	35.0	87.0	671.0
MCKHLYYYRFWRSIC	20.0	56.0	665.0
MCFHNFKTGVIVYC	26.0	103.0	675.0
MCREVYYYTLYIKHC	25.0	91.0	660.0
MCRRHVKYWIVWRQC	24.0	112.0	658.0
MCWWFKNHKFWHQTC	9.0	62.0	658.0
MCWWIRPSIGWLQVC	39.0	80.0	655.0
MCKRHYVYWKIWRQC	25.0	70.0	700.0
MCYWSQWFQYQRRQC	35.0	104.0	652.0
MCEYKRTLTYYRVWC	41.0	171.0	651.0
MCWWIQHPLFWSKIC	33.0	78.0	649.0
MCREILYYKYFYRFC	50.0	128.0	647.0
MCKHVLYYQIFHRWC	21.0	80.0	644.0
MCTHLYYYLTFHRHC	37.0	83.0	644.0
MCDNRHLWYYLVWHC	48.0	112.0	643.0
MCYTRKPFEFFWRLC	34.0	121.0	643.0
MCKYNRDLIFYRVFC	28.0	91.0	642.0
MCWEEFTKFGWWTIC	39.0	110.0	641.0
MCNHLFWYKQFLRHC	37.0	111.0	638.0
MCNRDLSYYLIFRFC	32.0	72.0	635.0
MCLVYIDQHLQFIC	18.0	57.0	635.0
MCRAILYYKLFHRVC	35.0	90.0	634.0
MCHKGHFYWFHYWSC	21.0	81.0	644.0
MCYEVFWYTYNRRKC	58.0	161.0	632.0
MCHFAYLWYKYQRRC	30.0	51.0	649.0
MCHKSNFYQYRYWIC	18.0	75.0	630.0
MCAYRHIYEPYWHSC	24.0	88.0	626.0
MCYEIHRFYYLLHRC	9.0	39.0	623.0
MCYKEFVFGYEYWTC	16.0	61.0	623.0
MCKQLHLFYYLLHHC	17.0	62.0	621.0
MCKHLAYYLIFNRWC	6.0	44.0	620.0
MCYAKQWYQYIRRHC	20.0	40.0	618.0
MCARELFYYKLWHC	60.0	129.0	618.0
MCKLHVRLYQIAYLC	47.0	101.0	618.0
MCTELFYYRLVHRAC	29.0	62.0	639.0
MCERHLTYYLLWRSC	21.0	66.0	630.0
MCHQFNWTIPRVYVC	38.0	94.0	614.0
MCLYEYIFQDLRVYC	17.0	56.0	613.0
MCHRHLIYYLAYRGC	30.0	63.0	612.0
MCYKNAFYGYRYWQC	15.0	57.0	612.0
MCEYNFLFDTVFVIC	15.0	72.0	610.0
MCYTKATVFSQWVLC	18.0	72.0	609.0
MCRELFYWKLWHSLC	18.0	54.0	608.0
MCKRHVRYWQLFVGC	25.0	117.0	627.0
MCYTKAPYQFRWVRC	24.0	72.0	604.0
MCYHRHKYEHFWRSC	38.0	84.0	603.0
MCHLWYYLVHHRRDC	23.0	72.0	614.0
MCERHLLYYLLHRVC	17.0	45.0	601.0
MCKLITYWKVWQRKC	20.0	63.0	601.0
MCYHRHKFWTAWKVC	18.0	98.0	598.0
MCHLFYYRIYKRQVC	17.0	74.0	596.0
MCKLHRFYYLQWLRC	29.0	67.0	596.0
MCRRHFFYYLLSHRC	35.0	56.0	596.0
MCYARHWYQYIRRHC	11.0	29.0	593.0
MCEREFLYIYLLELC	20.0	81.0	592.0
MCAKHRFFYLLVRKC	18.0	55.0	591.0
MCKKRHFHYFFYHDC	18.0	82.0	591.0
MCKYSVYWYKWQRKC	43.0	90.0	590.0
MCNKYLSLYRAFHQC	42.0	101.0	590.0
MCSIILYKIMKNRC	18.0	41.0	590.0
MCRHILYYRLWRSRC	19.0	75.0	590.0
MCYTVQWYKYWRKKC	28.0	78.0	589.0
MCYTKAPFQHRWYPC	21.0	61.0	587.0
MCPKRILYYYLTFHC	42.0	76.0	587.0
MCEHRHPYHFYWQLC	22.0	72.0	584.0
MCHVQYYRYFIRSLC	22.0	67.0	581.0
MCFHKHPYQRHWLSC	47.0	114.0	603.0
MCSWHKRSDFWLQFC	8.0	15.0	580.0
MCDFEIVLYKILRQC	43.0	104.0	580.0
MCATYIQYYRVARRC	23.0	88.0	578.0
MCKKLIWLYKASRHC	21.0	56.0	577.0
MCPYHVVLYKVLRSC	30.0	110.0	600.0
MCYTRGYYDQYWHAC	42.0	108.0	577.0
MCDYNHLRWKYWWIC	18.0	63.0	576.0
MCKLIRFYQIWHRSC	13.0	72.0	574.0
MCNHHLIYYLLHRRC	15.0	57.0	574.0
MCKKHLTYYLTYRYC	48.0	122.0	572.0
MCREIVYYLIVKRQC	31.0	88.0	572.0
MCEVRKHLFYYLLHC	26.0	78.0	571.0
MCEHWFKFYHTHRPC	15.0	54.0	570.0
MCPILWYKIQKGRVC	35.0	119.0	569.0
MCYAYIWYQWQRRKC	19.0	41.0	568.0
MCFRDIRTGQFVYC	60.0	148.0	567.0
MCKRYLVYYKIAHHC	26.0	96.0	584.0
MCDYIVFYKVLRQQC	42.0	67.0	564.0
MCKHFEILWFKLQQC	24.0	77.0	564.0
MCGRYLFYYRVWHSC	40.0	74.0	563.0
MCFPIIWYKIAKKQC	29.0	68.0	561.0
MCESKRWLLYYKLWC	19.0	94.0	560.0
MCWWIKHPYGWLQTC	33.0	89.0	559.0
MCYHRHPFHDRWHLC	19.0	69.0	559.0
MCERHVIYWLLFNKC	18.0	57.0	559.0
MCYEVHWYVYQRRHC	28.0	67.0	558.0
MCHLFYYKIWQRSLC	33.0	90.0	555.0
MCYKSYILYGRWRVC	19.0	100.0	575.0
MCHRHIIYYRLWHHC	18.0	92.0	553.0
MCEHKHPFERVWRSC	27.0	67.0	553.0
MCNHHLYYYLVYRSC	26.0	67.0	551.0
MCHVWYFDKQFHWVC	40.0	117.0	551.0
MCYTRRWNWQNWSRC	31.0	86.0	551.0
MCVLYWRLIQKSLHC	36.0	58.0	550.0
MCYTRGPYQRLWQQC	43.0	106.0	550.0
MCKYHRDLLYYFLHC	32.0	53.0	550.0
MCAVIWYKVQRGRVC	25.0	82.0	549.0
MCYHRHPLELKWQSC	30.0	85.0	564.0
MCKFKRELYYYLLTC	19.0	67.0	545.0
MCLKFVQYYRVLHQC	41.0	115.0	544.0
MCYTTHPYLFRWIEC	16.0	80.0	544.0
MCKFKYDLIYYKVAC	18.0	80.0	544.0
MCYKNHFYHYRYWDC	23.0	85.0	542.0
MCVYEYVFSTTTVHC	17.0	65.0	541.0
MCYHRHPFYRLWFKC	45.0	105.0	541.0
MCTHRHKYDIRWFLC	28.0	85.0	552.0
MCNTHLYYYLLFTGC	55.0	111.0	539.0
MCFHTYEWTWQYFQC	55.0	91.0	539.0
MCWFYIHDKGWFLC	32.0	67.0	538.0
MCYYHKISDFWILRC	41.0	44.0	538.0
MCEAKRWIAYYRAWC	27.0	73.0	536.0
MCDLFWYLLHHKREC	30.0	78.0	552.0
MCYTRQHKFDHWRLC	24.0	94.0	535.0
MCYNVIWYRYVRAKC	17.0	46.0	534.0
MCYEVFWYRWRRAC	28.0	63.0	533.0
MCPVLAYKVWWLHHC	54.0	106.0	532.0
MCEYRHKFEERWHVC	13.0	46.0	531.0
MCKDKLYLYYYLRWC	44.0	142.0	525.0
MCRYSKFWYQYVRRC	38.0	75.0	522.0
MCKEVVLYKVLRLSC	29.0	100.0	532.0
MCKIFYFNRTLHPAC	55.0	153.0	520.0
MCEHSYILHDRWRVC	30.0	57.0	519.0
MCFAVHWYQYQRRAC	14.0	24.0	516.0
MCDHRHPFQFHWYPC	17.0	52.0	516.0
MCYYYKLADFWAQQC	22.0	69.0	515.0
MCKLHIRYWQLHKSC	66.0	203.0	514.0
MCYTRRFKWQDWHAC	45.0	127.0	513.0
MCREVVYYQIYKRQC	26.0	109.0	512.0
MCFKAYWGDQIVILC	24.0	72.0	512.0
MCKLHLFYYSLHHAC	22.0	89.0	512.0
MCNKLVLYYQIFHAC	11.0	62.0	510.0
MCPHNKYLKYYLLFC	51.0	141.0	510.0
MCHKRFIKYWQLFHC	21.0	77.0	510.0
MCWWKKQYAFWIQIC	29.0	63.0	509.0
MCGKFVQYYRLYRRC	13.0	55.0	509.0
MCVREIRYWQLWRLC	30.0	72.0	507.0
MCHVYYYQLVRAYQC	35.0	83.0	517.0
MCFWSKLADFWVQIC	46.0	71.0	505.0
MCHTWFIYPKFVRVC	54.0	125.0	505.0
MCLYEFSYYHTAVHC	22.0	82.0	505.0
MCYHVQYYRALHRYC	26.0	73.0	504.0
MCPSKRHVFYYLLFC	49.0	114.0	504.0
MCPYTYVQYYRIFLC	63.0	101.0	503.0
MCREIIWYKLVKSTC	26.0	50.0	503.0
MCNKRQLYYYLLVQC	27.0	75.0	503.0
MCYHRHKYSTVWQVC	26.0	73.0	501.0
MCHWHLFYYKLFHKC	27.0	50.0	499.0
MCNKTYLKYYLVFNC	32.0	83.0	532.0
MCLWVRYYQLAKRHC	18.0	65.0	499.0
MCYTRHKFDHRWRAC	28.0	77.0	499.0
MCYHRHFFELYWHSC	17.0	65.0	497.0
MCKREVVYWRIFHAC	23.0	58.0	497.0
MCYTRPHWFAEWKIC	22.0	70.0	495.0
MCAKRHLLYYRIWYC	26.0	78.0	493.0
MCPYTWHNWNDWRSC	32.0	121.0	850.0
MCDNRKYLFYYLLWC	29.0	46.0	491.0
MCEHKHPYHLFWQPC	20.0	67.0	490.0
MCKYAIHWFKYQRKAC	23.0	61.0	490.0
MCYNHIWYQYVRRSC	32.0	90.0	490.0
MCYKRDLSYYLIWHC	34.0	78.0	490.0
MCYNVFWYRYWKRKC	35.0	56.0	489.0
MCDKFVKWYIVFRHC	37.0	99.0	487.0
MCYHRHIYQTNWVKC	20.0	56.0	487.0
MCEYEFVFGYNYWSC	31.0	106.0	487.0
MCYTRTHWWQNWQRC	34.0	82.0	487.0
MCKRLLYYYKLHLKC	29.0	84.0	485.0
MCYSIQWYKYQARRC	75.0	107.0	484.0
MCRDLYYYLYWRSKC	21.0	51.0	481.0
MCDIVIYKVLRLKC	25.0	70.0	480.0
MCDYAFYWWYRTHHC	51.0	87.0	480.0
MCNHVFYYKFVRRYC	19.0	68.0	479.0
MCERILLYYLAANKC	28.0	69.0	479.0
MCKTLAYYKIWNRRC	54.0	100.0	478.0
MCKNYVIYWKVWRKC	17.0	64.0	478.0
MCRYVVYYKLFRQHC	23.0	52.0	478.0
MCTRQLKYYLLFHQC	54.0	125.0	478.0
MCNLHLAYYKLFHFC	28.0	70.0	478.0
MCEHKYPWENIWYPC	17.0	81.0	477.0
MCFKKHLYYYKLWHC	20.0	96.0	477.0
MCYHKFPFSTVWLRC	37.0	59.0	476.0
MCTHRHKFQFLWRPC	27.0	66.0	476.0
MCKRYAKYWIVWRYC	9.0	43.0	474.0
MCKGYWIYWYRVQSC	19.0	71.0	474.0
MCYAFRWYQWQRRNC	33.0	57.0	472.0
MCYHVYWYQYQRRHC	23.0	77.0	471.0
MCNVFWYQIHFRRVC	15.0	46.0	470.0
MCKRQVLYYLIHLHC	17.0	47.0	469.0
MCYNVYWYLWQKKC	34.0	77.0	468.0
MCYVQYYRVAKAHFC	53.0	134.0	467.0
MCYHRHPYVLQWEHC	23.0	53.0	466.0
MCRFVQYYRIARHRC	42.0	101.0	466.0
MCWFFVYDQGRHVFC	33.0	68.0	466.0
MCYDFIGSYVHIHNC	16.0	37.0	465.0
MCNWHLFYYRWHRRC	17.0	46.0	464.0
MCERNLYYYFLFRRC	28.0	66.0	463.0
MCYHRHPYDKLWHKC	20.0	59.0	462.0
MCVYEFVFDQFNYSC	17.0	51.0	461.0
MCYDLYYFLLHHRKC	12.0	42.0	461.0
MCVHRHIFQAKWLRC	44.0	94.0	460.0
MCKWVQYYRVQRALC	24.0	61.0	470.0
MCYTRHPLQLKWYEC	21.0	79.0	460.0
MCNRHLVYWLLWSKC	16.0	63.0	459.0
MCHKKHLIYYLLFQC	20.0	68.0	475.0
MCWVYVNWRPGIILC	29.0	79.0	458.0
MCNRQLYYFLLYKGC	12.0	44.0	456.0
MCYTRKYYWQEWILC	20.0	77.0	456.0
MCYEVLWYRFYKKLC	42.0	65.0	456.0
MCGQHLFYYLLFTKC	25.0	75.0	455.0
MCDIRAPFFLFRWRC	22.0	34.0	454.0
MCYKHWPTGKLVYC	29.0	114.0	454.0
MCDYAYIWWFRRQKC	21.0	41.0	454.0
MCEFEIRWYQYQRKC	22.0	55.0	454.0
MCWWIKHPVYYSRIC	27.0	48.0	452.0
MCKTHLFYYFLYKQC	51.0	97.0	451.0
MCHKRYVRFYQIYLC	13.0	47.0	450.0
MCKREVVYYLIARHC	4.0	28.0	448.0
MCEIWFFDHQFWHVC	29.0	57.0	448.0
MCKYVQYWRIFNRQC	20.0	77.0	448.0
MCRHVYYWQLYHRVC	14.0	70.0	447.0
MCTKHLYYYLLHHHC	9.0	46.0	447.0
MCDKRLILYYLIAHC	19.0	64.0	444.0
MCTHRHKYQFHWQLC	25.0	59.0	455.0
MCTQLYYYKLYRRDC	27.0	87.0	444.0
MCWRHLAYYRIYRSC	25.0	60.0	442.0
MCHVFEILWYKTHYC	17.0	51.0	442.0
MCHKHLWYYRIWLHC	20.0	45.0	442.0
MCYHRHIYDQNWQHC	23.0	57.0	442.0
MCFKDHFFTFRYWHC	22.0	56.0	441.0
MCNVHLWYYRIWRHC	21.0	42.0	440.0
MCYTRKNKWSRWRVC	29.0	97.0	448.0
MCNRHIYYYKLHLKC	14.0	75.0	438.0
MCRELYYYLAWQRIC	39.0	124.0	438.0
MCKKDAFYSYHYWVC	16.0	65.0	437.0
MCTEHLFWYLLYHKC	14.0	49.0	436.0
MCHKHLFFWKLWHHC	11.0	44.0	435.0
MCKRILYYYLLDNIC	14.0	38.0	435.0
MCNIILYKIMKNRC	46.0	80.0	876.0
MCREVYYYQLIHRLC	25.0	52.0	528.0
MCKYHYVYYRIWQHC	26.0	89.0	433.0
MCDYVFWYKLWHRKC	22.0	65.0	432.0
MCYRHYLTGAYVYC	31.0	90.0	430.0
MCKRREIKYFLIWKC	12.0	45.0	430.0
MCKKYLLYWKISHWC	31.0	73.0	429.0
MCHLFYYKVWHQKWC	52.0	116.0	428.0
MCYTKYFYFEPWRIC	11.0	52.0	427.0
MCYHRHKFQFQWFHC	21.0	69.0	427.0
MCSIIWYKLQRRGFC	52.0	110.0	426.0
MCDYAYVQWLRWQLRC	30.0	52.0	426.0
MCAKFVRFYQVVHKC	24.0	63.0	426.0
MCKYKRVLTYYLVYC	14.0	86.0	426.0
MCYDLFWYKWFRRQC	29.0	106.0	435.0
MCHKKHFYSYHYWIC	33.0	96.0	424.0
MCYLFYYKVHNRQRC	27.0	53.0	423.0
MCKFQRDLIYYLVFC	19.0	39.0	436.0
MCYTRTFNWQQWSIC	18.0	75.0	422.0
MCFWHKKSEFWIRLC	17.0	60.0	454.0
MCHRHLVYYRIVRHC	21.0	97.0	421.0
MCRYHLAYYLLHHRC	18.0	34.0	421.0
MCYHRHPYQDHWHKC	19.0	65.0	420.0
MCYEFLWYKYYRKQC	44.0	69.0	440.0
MCQLFYYLQHRRSLC	22.0	77.0	420.0
MCYELYYWKLWQKLC	21.0	52.0	419.0
MCRIVQYYRFWRSVC	46.0	77.0	419.0
MCYTLTYYKVWRSLC	40.0	115.0	418.0
MCDVFYYRIYRRLVC	21.0	72.0	417.0
MCEHKRWLLFYKVWC	32.0	90.0	415.0
MCKRLIQYYRVFTLC	26.0	72.0	414.0
MCEHKQHLYYYLLFC	16.0	60.0	413.0
MCRKFVQYYRIWLAC	24.0	43.0	412.0
MCHVFYYLLHKKHSC	16.0	52.0	412.0
MCKVHLYYYKLIARC	22.0	67.0	411.0
MCYEYLFYYLQHKKC	15.0	41.0	411.0
MCDHRHPYVLYWLPC	11.0	50.0	411.0
MCWWFRTGPFWNQRC	28.0	65.0	410.0
MCYYDIHSRVIVYC	29.0	85.0	410.0
MCKDVFYYILVRRHC	10.0	32.0	410.0
MCFKEHLFYYTLYRSC	40.0	67.0	409.0
MCEYEIIFDTVIVHC	24.0	65.0	440.0
MCFHRHKYTAVWHIC	21.0	81.0	408.0
MCYEVLWYKIAKIQC	30.0	43.0	408.0
MCDRWVKYWIVWRHC	25.0	61.0	408.0
MCREILFYRIWRRGC	78.0	98.0	407.0
MCTHRHKFDLLWFTC	16.0	56.0	407.0
MCPYYVRYYQVVRYC	28.0	85.0	406.0
MCLYRHPYELHWHLC	21.0	65.0	406.0
MCRELSYYLLWRKWC	24.0	66.0	405.0
MCVDRQVFYYLLYKC	27.0	66.0	404.0
MCYTRGKYDVYWQTC	33.0	54.0	404.0
MCKTLFYYKLWARHC	29.0	57.0	403.0
MCVKRRHLYYYLLYC	24.0	46.0	401.0
MCKYGHFYSYEYWAC	33.0	77.0	442.0
MCVYEYVFGHVFWTC	28.0	67.0	400.0
MCYTRKPGEYRWYKC	40.0	122.0	400.0
MCPYVKYYVVWQRTC	33.0	109.0	399.0
MCNIVIYKILKRLC	18.0	39.0	399.0
MCYTRDRYELHWRLC	24.0	72.0	399.0
MCRDLYFYLAWHRHC	58.0	86.0	399.0
MCVTEVLIYKIRRRC	19.0	43.0	398.0
MCRIVQYYRLWHSHC	49.0	106.0	398.0
MCDIVIYKLFRKLGC	31.0	46.0	398.0
MCTYEYVFGYDYLFC	21.0	73.0	397.0
MCRHVFYYQVINRLC	22.0	70.0	397.0
MCYTRHKFDSVWHKC	23.0	58.0	429.0
MCREVLYYIVWRKHC	9.0	45.0	393.0
MCYSVLWYKYRKKVC	32.0	92.0	392.0
MCPRDIKYFWIWLKC	15.0	52.0	392.0
MCYDVLWYKWRYKTC	37.0	69.0	391.0
MCTTRKNKWEEWRPC	38.0	94.0	391.0
MCKHVLYYRLYRRAC	19.0	56.0	388.0
MCPYYILFYKVLRHC	40.0	41.0	387.0
MCYHRHIYQDVWYSC	34.0	75.0	386.0
MCYEIQYYRIWRSWC	19.0	59.0	385.0
MCRLVQFYRVLRASC	42.0	103.0	384.0
MCYHRHPYSTVWLSC	23.0	57.0	384.0
MCKQVLYYLLHVRDC	26.0	80.0	384.0
MCRHYVYYLTFHRSC	49.0	115.0	384.0
MCDLYYYLFWRSRKC	46.0	66.0	384.0
MCWHYRQSDFWFHLC	43.0	66.0	383.0
MCKYHFYSYNYWAIC	13.0	48.0	382.0
MCKVWFFKHQFWWVC	19.0	51.0	382.0
MCKRHIAYYLVWHKC	17.0	71.0	381.0
MCAFYKIIQRRLRSC	10.0	50.0	381.0
MCFWIRQSDFWLKLC	59.0	122.0	381.0
MCKFASVQWYKWQYC	27.0	83.0	380.0
MCNKYHLKYWLLWHC	12.0	45.0	380.0
MCERYITFWRVWKKC	24.0	43.0	380.0
MCERELFYWKLWQSC	23.0	64.0	379.0
MCDKYLQFYLIWHAC	25.0	45.0	379.0
MCLRHVVYYQIIHRC	18.0	58.0	379.0
MCYEVRWYQYRYHKC	28.0	49.0	377.0
MCEKRHLLYWGLFHC	23.0	98.0	377.0
MCNKHLYYYLLFHPC	15.0	68.0	377.0
MCEYKRLVAYYRAWC	38.0	51.0	377.0
MCYTRSWDWQDWQPC	15.0	69.0	377.0
MCRYVVYYKLIRRAC	14.0	44.0	377.0
MCNRELVYYLIFRSC	9.0	47.0	377.0
MCYDKEIVWFKVQYC	28.0	75.0	376.0
MCRELFYYLWHRRTC	35.0	60.0	375.0
MCRELYYYRIWTRKC	55.0	73.0	374.0
MCKKYVKYWNVYWFC	22.0	44.0	374.0
MCRHLIYWKLIHRHC	13.0	43.0	374.0
MCEHLFWYRIWHRNC	11.0	28.0	374.0
MCERHLAYYLYFTSC	28.0	71.0	374.0
MCKKLVYLYKAAHWC	20.0	57.0	374.0
MCHKKYLYYYLVYRC	9.0	29.0	374.0
MCNRVLWYYKFWRKC	29.0	60.0	382.0
MCKYRPFHFFKIIYC	24.0	56.0	370.0
MCDKYIKYWVIWNRC	12.0	41.0	370.0
MCDKFWVKYWIVHHC	26.0	66.0	368.0
MCWTDIYWYKWQRVC	21.0	78.0	368.0
MCKDLFYYVLYHRKC	16.0	46.0	365.0
MCWEEIIWYKLQHKC	9.0	43.0	365.0
MCLHVQYYRAIRSLC	22.0	64.0	365.0
MCFVKEWYQYQRRRC	28.0	51.0	365.0
MCKLVQYYRLWKAFC	16.0	44.0	365.0
MCYKNIKNGLFVYC	9.0	12.0	364.0
MCKEHLFYYLLNSKC	14.0	68.0	363.0
MCYWSYWYKWRRKHC	30.0	76.0	363.0
MCEKHIRYYQIWLKC	24.0	71.0	363.0
MCRHYTYYLLWHKRC	26.0	70.0	363.0
MCNRDLIYYFLFRAC	18.0	53.0	361.0
MCASKRYIQYWRVFC	31.0	68.0	361.0
MCYEVIWFKIQRNQC	29.0	70.0	361.0
MCKDLFYYLQHHRSC	8.0	36.0	361.0
MCDNDYGRWKLWWVC	36.0	82.0	361.0
MCKEVVLFKVLYAYC	12.0	39.0	359.0
MCRHILYYRYYLRHC	23.0	58.0	359.0
MCREIYYYLLVQSKC	13.0	32.0	372.0
MCHVLIYKIWRRNLC	30.0	70.0	358.0
MCLLYYKLYKKHLHC	22.0	77.0	358.0
MCQHLFWYLIHRRKC	26.0	72.0	358.0
MCYTTHHLIQIWGHC	9.0	43.0	358.0
MCYHRHPYEPLWRVC	23.0	59.0	372.0
MCTHRHKFQHFWLPC	14.0	48.0	357.0
MCLKLVQYYRAIRWC	12.0	42.0	357.0
MCNRQIWYYLHWRAC	22.0	61.0	357.0
MCHRYIKYWTIWQSC	17.0	55.0	356.0
MCFHKHKFALVWNLC	20.0	50.0	356.0
MCHVYYYLLYKKHC	11.0	40.0	355.0
MCHLAYYRIWRSKC	27.0	59.0	354.0
MCYTRAPFQELWSLC	38.0	65.0	354.0
MCPKALKYWIVWRTC	25.0	55.0	354.0
MCEVHYYRLIRARIC	15.0	55.0	353.0
MCRHVYYYKLHFRAC	18.0	56.0	353.0
MCQRLVLYWKLQHTC	19.0	62.0	353.0
MCKRHFWFYQYWTDC	10.0	41.0	352.0
MCKDHIYYYLIWRRC	17.0	45.0	352.0
MCDYNKYLLFYKIWC	25.0	57.0	352.0
MCPFSILWYKIDRHC	27.0	50.0	351.0
MCPHHKHLWLYLYWC	21.0	53.0	351.0
MCTHLKYYLIFRAAC	35.0	46.0	361.0
MCPRHVIYYLVARKC	43.0	99.0	350.0
MCKWHVQLWRVFHAC	28.0	79.0	365.0
MCKDLLYYKIWLQKC	11.0	46.0	350.0
MCAKHLFWYLLHHKC	5.0	29.0	349.0
MCKRHIQFWRVWHIC	31.0	75.0	348.0
MCLKHVLLYKIARHC	20.0	58.0	348.0
MCKRAVVYWKLWHHC	12.0	44.0	347.0
MCKKYIKYWLILRSC	17.0	61.0	347.0
MCLREIVYYRYWLKC	26.0	64.0	360.0
MCDVFYYRLFKRIEC	20.0	48.0	346.0
MCYTTHPLIQRWTQC	21.0	83.0	346.0
MCNHLIYYLAWRRQC	30.0	57.0	345.0
MCNKLHLFYYLVAKC	12.0	44.0	345.0
MCYKAVIWYKIHKYC	10.0	56.0	345.0
MCDNKRVLLYYRVWC	32.0	71.0	345.0
MCYELYYYKLWRAAC	28.0	73.0	345.0
MCNYTLYYYLLHHSC	26.0	46.0	345.0
MCPYAKYWIVWRSGC	33.0	102.0	345.0
MCYYKHKFALHWKSC	21.0	46.0	344.0
MCWHRHIYQPWWQSC	14.0	48.0	344.0
MCYTRRWFWQNYWPC	31.0	71.0	343.0
MCFHKHPYDIYWLSC	27.0	63.0	343.0
MCYPRDLLYYRLWLC	51.0	81.0	343.0
MCVHRHPYIQYWQQC	27.0	62.0	342.0
MCPRLVKYYLVWNKC	36.0	62.0	342.0
MCKRLVRYWQIFHNC	13.0	36.0	342.0
MCYEVYWYRYITRDC	43.0	85.0	342.0
MCKYIRFYQVWRAHC	19.0	50.0	342.0
MCKEVLYYLLARRAC	13.0	42.0	342.0
MCWYEFQLGYNFHYC	13.0	49.0	341.0
MCNKNNHTVIAWYFC	18.0	80.0	340.0
MCAYEYLWYRYVRKC	16.0	37.0	340.0
MCYASQWYQYVRRYC	19.0	45.0	340.0
MCHYYVTYYRAFHKC	16.0	61.0	340.0
MCEKYLYYYLLYRSC	9.0	47.0	340.0
MCDKRLHFTWLYYFC	22.0	62.0	339.0
MCWWIKNHHFWNLVC	24.0	38.0	339.0
MCERLFLYHYILHKC	17.0	52.0	339.0
MCNIYRHIQYYRVWC	58.0	142.0	338.0
MCYGYLWYKYIRRSC	38.0	48.0	338.0
MCKGYWQYWYRREYC	19.0	45.0	337.0
MCWHRHPYVFYWHNC	21.0	42.0	337.0
MCHKGWSTGWLWHC	15.0	68.0	337.0
MCHRHVYYYKLLKRC	11.0	56.0	337.0
MCYSVQWYQYIRRNC	41.0	51.0	337.0
MCKRLVLYYALFNKC	19.0	72.0	355.0
MCNKRQLFYYLLIKC	28.0	53.0	335.0
MCYEVWWYRWQRSTC	23.0	53.0	335.0
MCYYNIATHVLVYC	22.0	68.0	335.0
MCPKHLKYFWIYHFC	13.0	44.0	334.0
MCKAEVLFYLINRYC	8.0	53.0	334.0
MCWHRHPYEHYWRLC	27.0	68.0	333.0
MCKRHLVYYFLQIKC	26.0	51.0	333.0
MCHRHLVYYRIVRQC	28.0	66.0	332.0
MCNRHIYYWLLYHHC	14.0	27.0	332.0
MCKLHIRLYQIAYKC	20.0	71.0	331.0
MCKYLAYYLAFNKC	24.0	48.0	330.0
MCTHRHKYEWTWRPC	23.0	58.0	330.0
MCPFHYYVIYHRQQC	32.0	82.0	330.0
MCRELFYYQVWRRHC	24.0	49.0	329.0
MCYLYYYKLHHRRWC	19.0	57.0	329.0
MCYTKSFYWPIWRSC	23.0	60.0	328.0
MCNHLIYYKVWRKIC	16.0	65.0	328.0
MCDRILYYYRVWRRC	31.0	51.0	328.0
MCDSIVKYYLVYRYC	26.0	49.0	328.0
MCNFNVLIYKLWRKC	26.0	44.0	327.0
MCYHRHPFVQLWHPC	14.0	52.0	327.0
MCDKQHFYTYFYWDC	22.0	90.0	327.0
MCYDLIYYLSFHRSC	28.0	57.0	327.0
MCEHRHPYIFYWQPC	14.0	54.0	342.0
MCHRHVLYFKLFHHC	19.0	55.0	326.0
MCKELWYYLHWRRVC	16.0	50.0	326.0
MCQSRRQLLYYLLWC	22.0	40.0	326.0
MCRHLAYYKVWYRHC	25.0	58.0	326.0
MCFWRHWYQYQQRKC	32.0	61.0	325.0
MCNRHLYYWYVWHQC	22.0	44.0	325.0
MCDVLIYKILSASRC	26.0	53.0	325.0
MCKWAYYRSTWWLTC	28.0	44.0	325.0
MCDRFKFVRYYQIWYC	26.0	62.0	325.0
MCHRDHFYTYRYWRC	17.0	51.0	325.0
MCYTRHKFDQYWQPC	13.0	57.0	325.0
MCNTHLFFYLHYHKC	11.0	34.0	325.0
MCSWWKINQRYAFVC	26.0	48.0	324.0
MCYTRQHFFQNWSPC	19.0	61.0	324.0
MCYTRANKWSEWQHC	17.0	67.0	324.0
MCEHKHPYEILWHKC	13.0	51.0	324.0
MCKKAIYYYLIHRQC	21.0	62.0	324.0
MCKEVFYYKLYRKHC	11.0	61.0	324.0
MCWWVKQPIYYEKLC	32.0	40.0	322.0
MCQRELYYYKLQRKC	32.0	77.0	321.0
MCKYLYFWKLWHRKC	8.0	19.0	321.0
MCLRHVVYYKLFQKC	20.0	54.0	321.0
MCFQRHPLESRWRTC	19.0	45.0	320.0
MCRELYYYRLWARSC	35.0	95.0	320.0
MCKRWIRYWQVIHSC	26.0	50.0	320.0
MCGRYIRYYLVYRRC	9.0	28.0	319.0
MCYHRHKYSNHWSHC	23.0	30.0	319.0
MCHRENFYWYRYWVC	18.0	73.0	318.0
MCNEYLFWYLVHKKC	11.0	48.0	332.0
MCDKVQLYYFLLWRC	7.0	41.0	318.0
MCLDLFYWKLYHRAC	24.0	60.0	318.0
MCYHRFKFFQDWYPC	14.0	45.0	318.0
MCLYEFALGYHKIWC	14.0	58.0	318.0
MCNKHLLYYLSWHIC	33.0	61.0	317.0
MCFKRDLLFWSIWC	31.0	62.0	317.0
MCYTRHPYQLHWFKC	26.0	69.0	317.0
MCNLQLYYYLLNKSC	26.0	50.0	317.0
MCEYTYLFGYHYIKC	21.0	51.0	316.0
MCYTRINHFEHWRLC	32.0	92.0	315.0
MCAKEVLYYKIWIAC	20.0	58.0	315.0
MCRFVTYYRVWQSYC	22.0	50.0	315.0
MCFWRHKYERLWHHC	20.0	52.0	315.0
MCEYNFLFGRVWVKC	14.0	33.0	314.0
MCNRWVRYYQLIKYC	9.0	21.0	314.0
MCDRWSIVLYKILRC	23.0	59.0	314.0
MCTELFYYLLQQRRC	27.0	46.0	314.0
MCTYIFTGTHRSIWC	40.0	84.0	314.0
MCRELYYYKYWLSLC	24.0	62.0	314.0
MCDNLHILWYKIQYC	19.0	27.0	314.0
MCEWVYYQHTWYVWC	26.0	65.0	314.0
MCWEYWHDPYWLLTC	16.0	57.0	313.0
MCNRIRYYYLLHRFC	10.0	63.0	313.0
MCNRHYLYYLAFRSC	21.0	71.0	313.0
MCHHYWQYWYRREVC	16.0	49.0	313.0
MCYTRHYFEKRWRAC	25.0	62.0	312.0
MCTHRHPYQNKWHSC	17.0	47.0	312.0
MCLREIVYYKIARHC	15.0	59.0	312.0
MCYEIIFYKVLRRNC	32.0	68.0	312.0
MCNYVWYYQFWHRKC	17.0	49.0	312.0
MCEHYWTYVYIHQKC	23.0	52.0	311.0
MCHKRNIYYYLLWRC	10.0	33.0	311.0
MCYHRHPFELHWQQC	26.0	51.0	311.0
MCEYNFVLGNYYVVC	17.0	33.0	310.0
MCYKPYFPSLNWWFC	26.0	79.0	310.0
MCFHRHKFGQFWLQC	12.0	42.0	310.0
MCYTRQFWWEQWQFC	68.0	117.0	310.0
MCYHRHKFQIHWHVC	8.0	24.0	309.0
MCKHLTYWLIWHREC	13.0	44.0	309.0
MCYEFVFGYQFWSKC	18.0	47.0	308.0
MCTHRHPFHTVWHPC	28.0	56.0	307.0
MCKEILFYKVLRFC	28.0	66.0	307.0
MCYVQYYRIWQRYHC	30.0	67.0	307.0
MCKRQLYYYLWWKTC	14.0	44.0	306.0
MCHHLFYYKLYVRSC	30.0	37.0	306.0
MCYKKDLYYYFLYKC	18.0	48.0	306.0
MCDHRRFVVYYRIYC	21.0	34.0	305.0
MCEYKRQRFYYLLWC	22.0	95.0	305.0
MCKREVIYYSIWQQFC	20.0	64.0	305.0
MCLAKEVVWYKLQYC	22.0	64.0	305.0
MCRGLYYYLLHRQFC	14.0	28.0	305.0
MCKYNTTLWLYRLWC	10.0	33.0	304.0
MCRQYVYYRLWHRRC	21.0	69.0	304.0
MCYHRHKFWNQWYPC	13.0	55.0	304.0
MCREVYYYILQRKEC	24.0	74.0	315.0
MCWHRHKYQDHWVHC	17.0	49.0	304.0
MCPHAFYGYQYWVVC	21.0	78.0	303.0
MCYEKYWYAYQRRAC	24.0	60.0	303.0
MCAKQFFYYLLWRKC	19.0	29.0	303.0
MCWVFYHKDYSFVAC	23.0	50.0	303.0
MCKELYYYLLFRTKC	10.0	30.0	303.0
MCKTHLYYYLFWHQC	41.0	45.0	301.0
MCVHRHPYTAIWHVC	11.0	41.0	301.0
MCKFVWHKDYSYHDC	22.0	51.0	301.0
MCDLFYWRLWHQIKC	19.0	36.0	300.0
MCDYAYVSWYKFQRWC	18.0	41.0	300.0
MCNSHLFYYLLFNKC	25.0	32.0	300.0
MCLKWVQYYRALKWC	22.0	50.0	300.0
MCNKYLWYWLLWNKC	15.0	39.0	300.0
MCYAVLWYKQRRALC	22.0	35.0	299.0
MCYKDAFWSYRYWVC	24.0	57.0	299.0
MCHPIWIYKLLRSVC	16.0	34.0	299.0
MCYTKANYYEVWQPC	17.0	53.0	298.0
MCHRHVRYWQLFHRC	19.0	74.0	309.0
MCYKHNFYTYRYWQC	11.0	58.0	298.0
MCDYRRWVVYYKIHC	22.0	61.0	297.0
MCYNVYWYKWRRQQC	27.0	88.0	297.0
MCYNQYLFYYLQHIC	16.0	33.0	296.0
MCKRQLFYWLLTRHC	21.0	34.0	296.0
MCYTRHYFDQKWSVC	32.0	69.0	296.0
MCNIVLYKLLWSYC	22.0	37.0	296.0
MCYKYIRYWQIFHSC	23.0	33.0	295.0
MCKQLYYYLLWEKQC	19.0	55.0	295.0
MCHRLVQFYRIWHAC	27.0	61.0	295.0
MCKYHVYLYRLWRKC	16.0	46.0	294.0
MCYHRHRFELHWHPC	17.0	33.0	292.0
MCTHRHKFGIRWQHC	18.0	47.0	292.0
MCAKRHLIYYLLYC	13.0	46.0	292.0
MCYTKRPFENRWFHC	16.0	36.0	291.0
MCKNKHHLLYYLLWC	30.0	91.0	291.0
MCYHRHKFFQYWRPC	16.0	55.0	291.0
MCNRHIYYYLLQRC	5.0	27.0	291.0
MCPHHLWKYWYRVVC	20.0	70.0	291.0
MCVRHIRYWQLYIKC	34.0	73.0	291.0
MCEKYVQYYRIHLRC	22.0	57.0	290.0
MCNWSVNWYLFARRC	34.0	80.0	290.0
MCHQLYYYLLYQRDC	20.0	52.0	290.0
MCYAIYWYRWQKKC	10.0	21.0	290.0
MCNRHLVYYRVIHKC	25.0	72.0	290.0
MCKRQIYYWQLVHRC	14.0	43.0	289.0
MCYTRLNKHAKWQKC	35.0	87.0	289.0
MCNHFIKYWLVLRHC	13.0	38.0	289.0
MCDIVLFKIFRRLC	24.0	48.0	315.0
MCNKYLQYWLIWHQC	11.0	49.0	289.0
MCYNVLWYRYHKRSC	21.0	54.0	289.0
MCYDYIGSWLSIYPC	17.0	40.0	289.0
MCWWFKESDFWHKQC	18.0	42.0	288.0
MCYTKRPFDNYWVFC	13.0	40.0	287.0
MCPIIWYKIQRGLRC	56.0	68.0	287.0
MCEFRGNIFERWRSC	33.0	75.0	287.0
MCRHIVYYLLYKKC	15.0	43.0	287.0
MCTHRHPYTKHWLHC	4.0	43.0	286.0
MCNKWIKFYLVHRSC	15.0	43.0	286.0
MCPKRFVLYYQLIHC	43.0	86.0	286.0
MCYYEVRWYQWRRYC	20.0	24.0	286.0
MCPNIQLYYYLLYKC	16.0	27.0	285.0
MCYTRKHHWELWYPC	20.0	53.0	285.0
MCYTRHKFEAYWQVC	25.0	48.0	302.0
MCPNFKILWYKLQYC	16.0	46.0	285.0
MCPYAIYWYKWRKTC	22.0	64.0	285.0
MCKWFHPDYQYWYTC	20.0	34.0	284.0
MCKYTLTYYRIWKSC	18.0	52.0	284.0
MCENKRFLLYWKVFC	21.0	44.0	284.0
MCHHVRYYQIIRRDC	31.0	99.0	284.0
MCYKNIKTQVIVYC	29.0	67.0	284.0
MCYHRHPLEPNWHYC	17.0	45.0	283.0
MCTTRHRFEQFWHLC	17.0	57.0	283.0
MCYSHVLLYKILSHC	19.0	43.0	283.0
MCYHRHKFSNYWYHC	10.0	40.0	283.0
MCHTYIRFYQIWRRC	12.0	44.0	283.0
MCKNHILYYLIWHSC	9.0	35.0	283.0
MCDQYAVLWFKINYC	13.0	26.0	282.0
MCNDLHLFYYLLVHC	21.0	24.0	282.0
MCEWPKWLQKFVLFC	35.0	46.0	282.0
MCKQLFYYLISNRHC	21.0	43.0	282.0
MCKYVQYYRIWQAKC	26.0	53.0	282.0
MCPAKHLYYWKLFHC	17.0	63.0	281.0
MCSHIKANYGFVRVC	3.0	15.0	281.0
MCKRLVVYWRVSRQC	34.0	105.0	280.0
MCKPKTYLYYYLLWC	30.0	79.0	280.0
MCYTTHHLQVRWRFC	12.0	42.0	280.0
MCREVYYYQLYIRHC	23.0	53.0	279.0
MCKFRKDLYYWFLAC	21.0	48.0	278.0
MCLYVRYYQVFRAC	19.0	43.0	278.0
MCYYKWWYRYVRRC	20.0	39.0	278.0
MCREIVYYQLFRKSC	10.0	41.0	278.0
MCWWIKHHHFWQQLC	17.0	21.0	277.0
MCYTTHHLVQQWRHC	20.0	59.0	277.0
MCKRAVLYYLLTHRC	32.0	66.0	276.0
MCNNHLFYYRWWHQC	19.0	79.0	417.0
MCFHRHPLELYWHSC	17.0	41.0	276.0
MCTYEYVFGYYNVYC	12.0	37.0	276.0
MCNKRYLWYYLIHRC	9.0	26.0	276.0
MCEHIKYFLLWRKYC	17.0	48.0	275.0
MCYTRHKFQRKWQFC	25.0	54.0	274.0
MCRLVHYYRLYRQAC	23.0	73.0	274.0
MCYELKYYLLFHRKC	25.0	49.0	274.0
MCKARHLYYYRLWFC	15.0	47.0	273.0
MCYYDFLFSERTVWC	20.0	36.0	273.0
MCTEFVFGFVFNYHC	24.0	37.0	273.0
MCYHRHPYVRIWTLC	17.0	50.0	272.0
MCYYNYSDGRLIYC	28.0	73.0	272.0
MCHRYVRYWQLYHQC	17.0	85.0	272.0
MCYHRHKFEAFWRSC	12.0	34.0	272.0
MCDLYYYLWWRKVSC	16.0	69.0	271.0
MCHPRHIKYYLLYLC	16.0	39.0	271.0
MCRHVIYYLYAKRKC	22.0	56.0	270.0
MCDLFLYLQFHHRYC	39.0	52.0	270.0
MCYAVQWYQYRRSIC	12.0	35.0	270.0
MCRSVVYYRVWNRYC	42.0	65.0	270.0
MCKFHQDLFYYLQWC	24.0	55.0	269.0
MCTHRHPLEFAWRPC	22.0	49.0	269.0
MCFHRHRYDQYWQHC	22.0	60.0	269.0
MCYTRHRYEPHWHHC	21.0	41.0	268.0
MCKRWVVYWKIYRAC	15.0	36.0	268.0
MCKKGHFWGYQYWAC	11.0	37.0	268.0
MCFNIIWYQYRRRQC	13.0	31.0	268.0
MCLKHIQYYRVFRKC	19.0	69.0	325.0
MCPYDKYVLFYKVQC	27.0	94.0	267.0
MCFHRHKFQQFWLHC	21.0	39.0	266.0
MCRDYFYYRLWLKLC	16.0	48.0	266.0
MCKNVYYYILVRKFC	11.0	34.0	266.0
MCYTRTRFAQHWSQC	36.0	82.0	266.0
MCTYEYYLGWNHVVC	7.0	54.0	265.0
MCYTRHRFEPTWRYC	17.0	50.0	265.0
MCQVWYFDRGFYHVC	27.0	73.0	265.0
MCRHLAYYLAWKRWC	26.0	41.0	265.0
MCKRQILYYILWNKC	13.0	36.0	265.0
MCDLFYYLLHQRVKC	21.0	44.0	265.0
MCYKKHIVYWRAFHC	17.0	63.0	264.0
MCPRLVRYYQLFRLC	24.0	53.0	264.0
MCLQFNKNKPNIYPC	35.0	92.0	283.0
MCDYAFKWWFRHHC	23.0	36.0	263.0
MCYEVYWYRYWKHKC	22.0	66.0	263.0
MCVHRHPYEYYWHLC	15.0	40.0	263.0
MCYKKDLLYYLILQC	20.0	48.0	262.0
MCKLQSFYGFYYYNC	16.0	35.0	262.0
MCYEVFWFRYQQRWC	36.0	87.0	262.0
MCNKYVIYYRWFHWC	13.0	36.0	262.0
MCFHRHPLEQFWKLC	33.0	57.0	262.0
MCHFNIIWYKIHHNC	13.0	28.0	262.0
MCWWKKVHLFWHQFC	14.0	23.0	262.0
MCEHRHPYEQNWWRC	11.0	37.0	261.0
MCWKHVIWWKIQKQC	34.0	63.0	261.0
MCRHLKYYLIAHHHC	36.0	63.0	261.0
MCYTKYYPWEHWQPC	15.0	56.0	261.0
MCKRALYYYLFFRSC	18.0	48.0	261.0
MCYHRHPYQAVWHYC	26.0	65.0	261.0
MCPLYLRGGAAFWLC	79.0	174.0	261.0
MCKFDHTLWLYRLWC	11.0	35.0	260.0
MCRLIQYYRLIKRHC	25.0	33.0	260.0
MCQRYIKYWIVYHSC	16.0	33.0	260.0
MCNRLIRYWQLVRYC	20.0	46.0	260.0
MCYHRHPYWNKWQPC	26.0	47.0	260.0
MCKWRKDLLYYSLWC	18.0	66.0	260.0
MCTEYFVFYHTGRSC	20.0	42.0	259.0
MCETRLVWLYKAAYC	34.0	68.0	258.0
MCRELFYYRLIHWC	18.0	47.0	258.0
MCYVFHGNYLKVLRC	8.0	23.0	258.0
MCPYHLVYYLIHRAC	15.0	34.0	258.0
MCDKYVLIYKIWHAC	24.0	43.0	258.0
MCDYAFTWWYKHQYC	15.0	17.0	258.0
MCKRLVLYWKVQQSC	20.0	77.0	258.0
MCYYTYTFNRTDIHC	18.0	69.0	257.0
MCYEVLWFQFLHRQC	30.0	71.0	257.0
MCVYEYLFHTVKVQC	11.0	35.0	257.0
MCTTHLKYYLLVHHC	40.0	81.0	257.0
MCYNRHPYETVWHIC	23.0	34.0	257.0
MCADLFYYLYWRKHC	20.0	33.0	257.0
MCVHRHRYSQHWLQC	19.0	51.0	257.0
MCHLKYYLLYHKHHC	29.0	74.0	256.0
MCTRILTYYLLHHKC	26.0	41.0	256.0
MCQVQYYRAFLRRAC	31.0	79.0	255.0
MCDYKRHVKYYLVWC	22.0	41.0	255.0
MCYTKAFVDQNFWVSC	14.0	45.0	255.0
MCVHRHPYQKEWFLC	15.0	39.0	255.0
MCYTRQYEWQRWYSC	32.0	76.0	255.0
MCEHRHPYWHQWWPC	7.0	36.0	254.0
MCWHRHKFQSDWLSC	8.0	44.0	254.0
MCWVQYYRIHHRRWC	22.0	57.0	254.0
MCYTRHKFTAWQKC	20.0	54.0	254.0
MCYAKLWYQYQRVKC	17.0	41.0	375.0
MCSRHVLYYRILRSC	0.0	8.0	253.0
MCFQRHIFQKHWHPC	19.0	37.0	253.0
MCYEFLFGYQYVSKC	20.0	36.0	253.0
MCRNIVYYKIWLSC	11.0	41.0	253.0
MCEHRHPFRRVWYKC	9.0	33.0	253.0
MCDVFYYLLWHRHQC	17.0	40.0	253.0
MCYHRHPLQNNWFLC	15.0	40.0	252.0
MCKYIIWYKISKAKC	7.0	38.0	252.0
MCYIQYYRVFHRQWC	29.0	57.0	252.0
MCRYIKYWQVFRTHC	13.0	32.0	252.0
MCYHRHTYELYWSIC	9.0	57.0	252.0
MCKIWYFTNNFYWVC	34.0	67.0	263.0
MCFWHRIGNFWARWC	33.0	50.0	252.0
MCKQHLFYYLIFTRC	16.0	35.0	251.0
MCYHRHPYQHYWLNC	13.0	40.0	251.0
MCYTKKYWWDRWQIC	26.0	49.0	251.0
MCLVYDKESQLIFIC	19.0	45.0	251.0
MCNNRILYYFLLQHC	4.0	15.0	251.0
MCDNIQTSWKYWWIC	25.0	60.0	251.0
MCYHRHKFQSFWQYC	12.0	35.0	251.0
MCRHVLYWLLTHKHC	46.0	67.0	251.0
MCRFIRYYQLYYKC	16.0	30.0	251.0
MCGRFIRYWQIWKAC	31.0	41.0	250.0
MCFHRHKFQQLWLIC	14.0	36.0	250.0
MCRNVYYYLLVHKEC	16.0	39.0	250.0
MCTHRHPYVDYWQLC	14.0	45.0	250.0
MCHRHIRYWQVFRSC	39.0	78.0	249.0
MCYKAFYLWKQYQDC	30.0	37.0	249.0
MCYYEINYWSSRWQC	19.0	52.0	249.0
MCPYVKLWTVWKFC	42.0	64.0	249.0
MCHKYVLYYLLNRYC	13.0	26.0	249.0
MCKNHFYGYYYWSEC	14.0	21.0	260.0
MCREIVYYLLYAKKC	18.0	54.0	248.0
MCSKHILFYKVARKC	24.0	36.0	248.0
MCVYVYTGSHLHVHC	10.0	40.0	247.0
MCWWKSVGPFWIKFC	26.0	46.0	247.0
MCHHVFYYLLVQRQC	6.0	25.0	247.0
MCLVRDQWGHLILIC	35.0	60.0	247.0
MCYHRHPYTYLWHHC	16.0	49.0	246.0
MCHTWFHFYHTVHLC	5.0	24.0	246.0
MCWFFVFHEKRHIYC	11.0	29.0	246.0
MCVHRHPYENYWSQC	13.0	34.0	246.0
MCHLYVQYYRILHKC	16.0	55.0	245.0
MCYHRHKYQQQWWIC	19.0	51.0	245.0
MCYTRENWFAQWKQC	14.0	47.0	245.0
MCARHLFYWKLHHSC	14.0	27.0	245.0
MCYTKAPRSNLWQKC	29.0	56.0	245.0
MCYDFVFGYESLRFC	11.0	37.0	245.0
MCFHRSRYDKFWQIC	10.0	36.0	245.0
MCYSTLWYKYRRRAC	15.0	64.0	245.0
MCTHRHKYSHHWLSC	13.0	42.0	244.0
MCKYHLAYWKLFHFC	17.0	33.0	244.0
MCWHYRNVVGWLKTC	21.0	52.0	244.0
MCYNVLWYKYQQKQC	22.0	49.0	244.0
MCTHRHPFSQIWLEC	19.0	41.0	244.0
MCVYEFVFDNVFHYC	9.0	34.0	244.0
MCTEVQYYRIWRTYC	24.0	49.0	244.0
MCLRYVLYYKLFHHC	3.0	22.0	244.0
MCHYGYFWYRYVKRC	16.0	39.0	243.0
MCFHKGRFDSYWQDC	26.0	74.0	243.0
MCRHVLYWKVWRRTC	23.0	52.0	243.0
MCFWIKQPFYFYQVC	20.0	33.0	243.0
MCTQFNKFWPRVYAC	27.0	43.0	243.0
MCNDFAIVWYKLQHC	17.0	40.0	243.0
MCYTRQPYERFWHPC	32.0	83.0	243.0
MCKEVIWYKLFKHLC	21.0	30.0	242.0
MCYTRHRFDPEWHHC	19.0	27.0	242.0
MCHRHVQYYRIVYRC	17.0	43.0	242.0
MCWHRHYFDRYWQHC	16.0	45.0	242.0
MCKRQVLYYKIWHFC	37.0	65.0	242.0
MCYTRTYKWQNWLEC	24.0	61.0	242.0
MCYDLWYYQFFHRRC	27.0	62.0	241.0
MCKDLFYYLSFLRKC	24.0	29.0	241.0
MCKKHFVFWRAFQFC	30.0	70.0	241.0
MCYLVSINHYIAYVC	25.0	72.0	240.0
MCPRHVLFYLIHTKC	30.0	72.0	254.0
MCRYVLYYQLFHQSC	34.0	53.0	240.0
MCRPVFYYILHHRKC	18.0	41.0	240.0
MCYDLFYYLHWQKVC	42.0	72.0	240.0
MCYHRHPHELFWSKC	7.0	48.0	240.0
MCDLYAYLIHFRQQC	12.0	32.0	240.0
MCRDLFYYRFFYRLC	23.0	48.0	239.0
MCKRWVKYYQLWHQC	11.0	22.0	239.0
MCAKYLQYWKVFHKC	19.0	51.0	239.0
MCLKHVVYYRIWKKC	23.0	41.0	239.0
MCKREITYWKIWLC	10.0	35.0	239.0
MCRYLAYYKVWHRHC	25.0	56.0	239.0
MCHVQYYRVWLRHYC	33.0	69.0	239.0
MCYTRHKFEEFWHTC	11.0	26.0	238.0
MCYTRHPLAEKWKIC	23.0	57.0	238.0
MCHLYYYLLHKKVYC	16.0	33.0	238.0
MCVHRHPYQQQWQFC	25.0	39.0	238.0
MCTYVFHGRYARIQC	16.0	35.0	237.0
MCYHRYIYEPYWRQC	26.0	46.0	237.0
MCDYRLWVRYYQVIC	29.0	43.0	237.0
MCKRHIIYWKIWSNC	6.0	31.0	236.0
MCFHKHPYELHWRTC	20.0	43.0	236.0
MCKYKTITLFKVLYC	11.0	31.0	236.0
MCKHILYYKIFRGLC	21.0	50.0	236.0
MCYIEYVLGYQALQC	31.0	52.0	236.0
MCLYEILWWQYRRRC	16.0	24.0	235.0
MCYNVYWYRYLYRKC	13.0	44.0	235.0
MCKRHLLYYLHFVKC	5.0	31.0	235.0
MCWWIPTGPFWYQAC	41.0	44.0	235.0
MCDYNPYRWFWVIPC	8.0	24.0	235.0
MCELKHFWFYFYHTC	15.0	19.0	235.0
MCYTTHPLVQNWQPC	24.0	57.0	234.0
MCHRYYYYWRLFHRC	10.0	25.0	234.0
MCAYHVRYYQVLRVC	12.0	57.0	234.0
MCYEYLWYRYRSKQC	26.0	55.0	234.0
MCTEFIFGYVKNYLC	27.0	43.0	234.0
MCYTKAYFDQDWYPC	19.0	37.0	234.0
MCKYVQFYRVHLRQC	15.0	35.0	234.0
MCPYHVQYYRALFRC	27.0	62.0	234.0
MCKREVAFYRIWKAC	28.0	61.0	234.0
MCGREIVYYLAYRYC	15.0	42.0	233.0
MCDLFYWKLFHAQHC	18.0	47.0	233.0
MCYEVLWYRYTQRKC	22.0	33.0	233.0
MCYNKHLWYYLVFNC	16.0	35.0	233.0
MCPRVLKYYQIWRVC	32.0	72.0	233.0
MCYHRHKFWPRWHSC	8.0	34.0	233.0
MCKYIVLWYQYQRRC	10.0	17.0	233.0
MCSIWIIKGRPYWVC	25.0	39.0	233.0
MCYTKKPYQKLWSKC	19.0	38.0	232.0
MCYTRRYAWQQWSYC	23.0	71.0	232.0
MCKAVAYYKVWHTYC	21.0	48.0	232.0
MCYKQDLFWWKLFHC	21.0	62.0	232.0
MCYKNIANNVIWYC	21.0	57.0	232.0
MCTHRHPYQLHWHFC	33.0	67.0	232.0
MCNRSIKYYIVWRLC	33.0	66.0	231.0
MCDQHLFYYRLFFSC	37.0	91.0	231.0
MCFHKHPYSYKWLRC	18.0	47.0	231.0
MCDEFAILWYKIRWC	36.0	34.0	231.0
MCNRPFLYYLLHKRC	15.0	61.0	231.0
MCHKIHLHYYKLFLC	14.0	47.0	231.0
MCNKEVKYFLIWRAC	21.0	35.0	231.0
MCKEILYYLLYKSHC	21.0	39.0	231.0
MCYYWQYIYEHQLTC	26.0	35.0	231.0
MCYKSEFYGFNYWHC	15.0	25.0	230.0
MCKWVTYWKILHRQC	17.0	55.0	230.0
MCKVIDIIWYKLHYC	20.0	23.0	230.0
MCHKRWVRYWQLFKC	22.0	62.0	230.0
MCKGDRYLLYYLLWC	39.0	52.0	230.0
MCYTRHRYQAVWVYC	17.0	59.0	230.0
MCQDLFYYKLWRRKC	25.0	36.0	230.0
MCKYDFYSYQYHALC	10.0	43.0	229.0
MCKKHLTYFLIWTKC	18.0	41.0	229.0
MCYHRHPFQHFWRVC	17.0	51.0	229.0
MCLHRHPFDQYWQPC	15.0	55.0	229.0
MCVVHLVPHVLQFIC	13.0	39.0	229.0
MCHYWQYVYQHQQRC	19.0	51.0	229.0
MCTHRHKFQNDWQVC	22.0	56.0	228.0
MCEQRVLLYYKIWQC	25.0	81.0	228.0
MCVNWVKYYLIHRRC	35.0	83.0	228.0
MCPRHIKYFLIWQHC	24.0	61.0	228.0
MCKFQRDLVYWLSFC	23.0	46.0	228.0
MCHLHYYKLVRRFYC	14.0	30.0	228.0
MCDYKRILLYYKLAC	30.0	70.0	228.0
MCKVWYIYPAFLWVC	21.0	33.0	228.0
MCKLYLHYWKIAHAC	14.0	34.0	227.0
MCWANVYWYRYVRRC	18.0	21.0	227.0
MCYYTYLFGYQYVSC	11.0	33.0	227.0
MCEYEFVLGQTKVHC	16.0	41.0	227.0
MCYTHRPFQFLWSHC	20.0	51.0	227.0
MCYHVQYYRVLRRKC	14.0	33.0	226.0
MCRHVYYYRLIKSHC	10.0	37.0	225.0
MCPSEFYGYHYHVVC	36.0	85.0	225.0
MCYTTHHLIQHWRLC	21.0	36.0	225.0
MCYNVHWYRWRVRLC	19.0	73.0	225.0
MCPYHIKYWIAWRYC	22.0	49.0	225.0
MCKGKFYTFQYWYLC	10.0	42.0	225.0
MCKDFQITWFKLQYC	22.0	43.0	224.0
MCYTRRWQWDRWQKC	23.0	41.0	224.0
MCWKDHFYTYKYWHC	11.0	27.0	224.0
MCNIHLFYYLQHKNC	14.0	48.0	224.0
MCYTRSKFDQYWSAC	23.0	54.0	223.0
MCYTKFRFERHWRPC	15.0	38.0	249.0
MCKRILFYWSLSRRC	11.0	41.0	223.0
MCTHWHPYIQILYSC	23.0	38.0	223.0
MCYWSKTGPFWIRWC	23.0	31.0	223.0
MCPRELFYYLLTRKC	19.0	42.0	223.0
MCEYIYTGNHLRIWC	9.0	20.0	222.0
MCNRAVVYYQLWHRC	24.0	73.0	222.0
MCVKLYPDPNWWFC	16.0	54.0	222.0
MCRRVLAYYRAYHWC	29.0	44.0	222.0
MCLRLVQFYRAYRSC	18.0	46.0	222.0
MCHNVLYYKIIRRLC	10.0	64.0	222.0
MCVYDFTFNRLHVHC	22.0	45.0	221.0
MCHPQLFYYLLYKKC	13.0	47.0	221.0
MCKHQRTLWYYLAFC	34.0	47.0	221.0
MCYAVIWYRYQQRQC	23.0	24.0	221.0
MCHHKHPYAIHWLSC	16.0	39.0	221.0
MCPVLAYKVHYAFHC	28.0	69.0	221.0
MCYTVRNKFDRWRFC	12.0	31.0	221.0
MCKRHIVYYLLIQHC	18.0	34.0	221.0
MCHVLYYKIWKRHVC	15.0	57.0	221.0
MCEHRHPLFYAWQPC	11.0	35.0	221.0
MCHLYYYLLQKRVDC	23.0	61.0	221.0
MCRHLFYWRLFNSQC	22.0	43.0	220.0
MCWWFKESDFWLRIC	25.0	28.0	220.0
MCYSILWYKIQKPKC	16.0	27.0	220.0
MCHKRELWYYLFWKC	13.0	28.0	220.0
MCDKWHLLLWKAFHC	21.0	62.0	220.0
MCYEFVFGHAYQYYC	12.0	39.0	220.0
MCHKHLYYYLLYYKC	16.0	39.0	219.0
MCYSILWWQYHNRAC	35.0	66.0	219.0
MCDPLYYYLIWSRKC	31.0	69.0	219.0
MCNNWEILLYKVLKC	22.0	43.0	219.0
MCTYVFTGSHARKHC	15.0	54.0	219.0
MCKEIYYYRLVYKHC	18.0	34.0	219.0
MCYTRHPFEPVWRHC	19.0	50.0	219.0
MCYTKSKYQHRWHSC	16.0	67.0	218.0
MCNYEVIIWKILRHC	19.0	21.0	218.0
MCKWSWYTWTDWRLC	9.0	34.0	218.0
MCYPDSFYEFRYWRC	23.0	41.0	218.0
MCEYRHRYEPHWHQC	7.0	52.0	218.0
MCKKFIAYWKAFHSC	13.0	31.0	218.0
MCYTRKHIWQNWRKC	24.0	54.0	218.0
MCEQRFPYSQIWLKC	12.0	44.0	218.0
MCKTHIRYWQIVRRC	19.0	56.0	218.0
MCYHIHYYRLVRKHC	14.0	39.0	217.0
MCNRHLWYYLFWQKC	16.0	31.0	217.0
MCKRHLRYWQLVRKC	21.0	57.0	217.0
MCKHLFYYLHYQRQC	20.0	34.0	217.0
MCGLHVRFYQIYRQC	22.0	79.0	217.0
MCWKHLFFYRVWHKC	17.0	18.0	217.0
MCLEILWYKLQKQTC	31.0	32.0	217.0
MCQRQLYYYLIQRRC	13.0	45.0	216.0
MCYKDHFYAYWYWNC	11.0	23.0	216.0
MCYTRRYKFQHWWPC	19.0	45.0	216.0
MCDRHLLYYKLFNHC	12.0	40.0	216.0
MCKQFNRSVPLLYDC	35.0	82.0	215.0
MCYHRHLYDQIWRHC	19.0	49.0	215.0
MCHPHLFYWLIWHKC	15.0	37.0	215.0
MCAKHLYYYLTVHRC	15.0	46.0	215.0
MCYTSHPIFRFWHQC	32.0	43.0	215.0
MCKKYVAYYKAYHYC	18.0	44.0	215.0
MCPYYVQYYRSFRVC	48.0	76.0	215.0
MCHVQYYRIVKRLFC	25.0	67.0	215.0
MCDYAYHWWYTKFHC	21.0	34.0	214.0
MCDLFYYLIHLKQQC	38.0	42.0	214.0
MCLNSITIYKVLRQC	17.0	29.0	214.0
MCWWKFWYQYERRLC	26.0	34.0	214.0
MCKDLLYWKLQHRLC	19.0	47.0	214.0
MCYAKFWYLYTRRQC	25.0	37.0	214.0
MCKRHLLYYLVWHNC	15.0	26.0	214.0
MCYHKHPYQDHWHLC	16.0	42.0	214.0
MCEFYVWNRVDWPWC	14.0	30.0	214.0
MCRELFFYRFWQRYC	20.0	39.0	214.0
MCKKEIKFWTVWRLC	10.0	45.0	214.0
MCKELFYYRFIRRHC	13.0	33.0	214.0
MCRHVLYWKLVASYC	13.0	48.0	213.0
MCNLVSIFGYVAYIC	19.0	33.0	213.0
MCYYEYTFHHVTITC	19.0	39.0	213.0
MCNLRHLVYYKLWHC	15.0	39.0	213.0
MCNHRHKYESRWHHC	15.0	39.0	213.0
MCPKYVKFWQVWITC	21.0	42.0	213.0
MCYTRHPYEAFWHQC	17.0	41.0	213.0
MCYTVLWYRTQRRWC	74.0	123.0	213.0
MCHYYIWNYQSWPQC	23.0	45.0	213.0
MCKEVYYYIINRYRC	17.0	33.0	213.0
MCYVWLYKAAKKWC	15.0	39.0	212.0
MCLRLVQYYRVQRRC	22.0	50.0	212.0
MCYTRQSKWHQWILC	28.0	46.0	212.0
MCPYSWHQWRDNRFC	24.0	76.0	212.0
MCPREVVYFKVWLSC	33.0	61.0	212.0
MCQSYVLFYKVLRRC	13.0	43.0	212.0
MCYSLQWYKYVKRNC	35.0	54.0	212.0
MCNKRILAYYRLWSC	21.0	68.0	211.0
MCHVRYWQLFHRFNC	19.0	39.0	211.0
MCPHYVKYWNIWHSC	46.0	66.0	211.0
MCIDLYYYLIWQRYC	3.0	13.0	211.0
MCYTRTWHWQQWSPC	21.0	57.0	211.0
MCSIWIIDRIPYWVC	26.0	45.0	211.0
MCLKDIIWYKVQYKC	10.0	23.0	211.0
MCKHIKYYLIWRHYC	11.0	15.0	211.0
MCYSVHWYRYIRAHC	25.0	31.0	210.0
MCVHRHPLERKWHHC	9.0	38.0	210.0
MCRHHLFYWKIWHAC	15.0	41.0	210.0
MCYKNQFFGYWYYNC	11.0	43.0	210.0
MCEYRHIFQDHWHHC	9.0	37.0	210.0
MCVKDIVIYKILWKC	15.0	30.0	210.0
MCFHRHPYDNFWRWC	28.0	46.0	210.0
MCHLYYYLLHSQRKC	37.0	79.0	210.0
MCAYYVTYYRALHRC	26.0	37.0	210.0
MCAKYLRYYQIFKQC	18.0	62.0	210.0
MCKQRFFYLLWHSRC	24.0	43.0	209.0
MCHKKFLYFYLVAHC	10.0	39.0	209.0
MCERFVKFWIVYRQC	19.0	38.0	209.0
MCPDRWIKYWIVWRC	32.0	57.0	209.0
MCKKYITYYLIYHHC	10.0	29.0	209.0
MCYTRAYYDLFWRKC	15.0	35.0	209.0
MCYVKEVQWYKVQYC	24.0	39.0	209.0
MCHFYKLWYQYQRRC	13.0	22.0	209.0
MCYHRHIYASYWLPC	11.0	29.0	209.0
MCYTKRPYSQHWHKC	15.0	56.0	209.0
MCDVFYYRLYHRNTC	21.0	35.0	209.0
MCNRHIKYWTVFYHC	12.0	36.0	208.0
MCKQVYYYKLYLRQC	22.0	41.0	208.0
MCNLYVYYYQLYHKC	12.0	34.0	208.0
MCYTRKPFDQKWLIC	26.0	57.0	208.0
MCTTNRVRWKYWWIC	21.0	26.0	208.0
MCFQRHRYQTVWISC	20.0	53.0	207.0
MCKELHYYLIWHRWC	21.0	53.0	207.0
MCLKHLIYYLTWHKC	20.0	35.0	207.0
MCKRVLLYYTLWHKC	10.0	23.0	207.0
MCYNVFWYKYWRSKC	14.0	56.0	207.0
MCRYKRHLYYYLLQC	12.0	30.0	207.0
MCEYRHPLQSWWQPC	17.0	46.0	206.0
MCKKHVLFYKIVRAC	14.0	40.0	206.0
MCPKRLVLYWKVAHC	89.0	157.0	206.0
MCKYKRHLWYYLLHC	14.0	27.0	206.0
MCNREVLFYKVWRVC	25.0	43.0	205.0
MCNLHLFYYLHVHHC	10.0	36.0	205.0
MCNRHVVYYKLFRQC	15.0	39.0	205.0
MCYKNWFKYGFFWIC	20.0	61.0	205.0
MCWWFKNHHFWVKHC	20.0	30.0	205.0
MCRNIYYYFLVAKHC	20.0	22.0	205.0
MCYKKYFPKLLWWFC	11.0	21.0	205.0
MCNDYLTYYRWFHWC	18.0	34.0	205.0
MCVYEFSLGQNRILC	13.0	31.0	205.0
MCYDVFNYLFVYTQC	23.0	46.0	204.0
MCWWVQHYKFWSQIC	21.0	28.0	204.0
MCKTHIRYYQILRKWC	19.0	43.0	204.0
MCTLIQYYRIIRSVC	24.0	32.0	204.0
MCKRHVRYWQLYKQC	18.0	45.0	204.0
MCPKLYVTYYRLWHC	54.0	83.0	204.0
MCKQLFYYLLYRAKC	7.0	23.0	204.0
MCKVWYVASKFYWVC	21.0	49.0	204.0
MCHLWYYKLWRKYHC	19.0	29.0	204.0
MCYKNIVSQVFIYC	37.0	70.0	204.0
MCYAVYWYQQQRKC	23.0	39.0	204.0
MCVKTVFYTYQYWAC	23.0	45.0	204.0
MCHRHKILWLYRHWC	19.0	57.0	204.0
MCYTRHYFEPIWRPC	16.0	42.0	204.0
MCYTVHPFEQHWRKC	21.0	49.0	204.0
MCKRVLKYYKIWLHC	11.0	29.0	203.0
MCFWSKLDKFWFKQC	25.0	43.0	203.0
MCWHRHPYDKYWSTC	14.0	25.0	203.0
MCTDKLYLFYYLQHC	26.0	54.0	203.0
MCREVVYYRIWHQAC	24.0	59.0	203.0
MCTYRHKYEYFWHSC	9.0	27.0	203.0
MCRHVFYYRLIRTVC	13.0	30.0	203.0
MCHKLVRYYQIWAKC	18.0	41.0	203.0
MCYYTHWYRWRYSLC	24.0	37.0	202.0
MCNKYIYFYLLHHRC	13.0	36.0	202.0
MCKKYLFLYKVWHQC	21.0	48.0	202.0
MCYYDHIGNYQFFHC	4.0	18.0	202.0
MCWHRHKFAESWQHC	15.0	27.0	202.0
MCHKRLIVYYLLSHC	9.0	49.0	202.0
MCEHQHLFYYLIYRC	16.0	43.0	201.0
MCPYAKLWYQWQRHC	28.0	72.0	201.0
MCDRHVRYYQLYYLC	22.0	47.0	201.0
MCRIHYYYLLVHKHC	18.0	22.0	201.0
MCHKFVLYYLISHKC	28.0	37.0	200.0
MCRHLAYYRTWVRYC	23.0	44.0	200.0
MCHKYVKYWIAWHYC	13.0	46.0	200.0
MCKKHVFYYLLWRHC	6.0	13.0	200.0
MCDPRRHLVYYLSFC	47.0	63.0	199.0
MCFHRHKFAAVWKYC	12.0	24.0	199.0
MCWHRHPYQKHWHKC	11.0	30.0	199.0
MCKLKNFYHYYYYVC	9.0	19.0	199.0
MCTYTYVFDYLVVDC	17.0	69.0	199.0
MCHWKYWYVWRRSLC	37.0	65.0	266.0
MCDYAIIWYKIQRLC	11.0	21.0	199.0
MCPNQLFYYLLWRKC	32.0	45.0	199.0
MCHVLIYKLYRGRFC	48.0	82.0	199.0
MCRRWVVYYRALRSC	17.0	45.0	199.0
MCLVHDKYGWLLFIC	25.0	48.0	199.0
MCWHRHKYAEFWHHC	12.0	37.0	198.0
MCYVHYYRIFRGTYC	8.0	33.0	198.0
MCKPDYHWTWLFYFC	16.0	30.0	198.0
MCYHRHKFQYHWRVC	15.0	30.0	198.0
MCNKHVVFWKVWLRC	15.0	37.0	209.0
MCQYNENRWHFWWIC	46.0	41.0	198.0
MCYNLYYYLVYRRKC	12.0	31.0	198.0
MCYTRQYKFQAWQPC	14.0	61.0	198.0
MCAVHRFYYLQWLKC	22.0	33.0	198.0
MCIKWHFAYSNWREC	27.0	77.0	198.0
MCWWIRRSAFWFKVC	27.0	52.0	198.0
MCRHLYYYLLHSKGC	14.0	42.0	198.0
MCPLYLYKGVAFFMC	38.0	65.0	198.0
MCKKVLQFYKIWRAC	17.0	40.0	197.0
MCKRWVRYYQIVYQC	16.0	33.0	197.0
MCNIQVYYYLLHKKC	11.0	26.0	197.0
MCKGQFYSYHYWLVC	14.0	45.0	197.0
MCDKLYLQYYLIFKC	18.0	37.0	197.0
MCRDHLFYYRLWRRC	20.0	31.0	196.0
MCTYEFIFNNLILHC	11.0	28.0	196.0
MCDVHYFRLVRKYIC	20.0	49.0	196.0
MCWPSWLTKYVLSC	27.0	50.0	196.0
MCHLWYYLHYHRRQC	26.0	28.0	196.0
MCLRHIVYWKHWHKC	22.0	63.0	196.0
MCHLYYYKLYWRHC	26.0	39.0	196.0
MCRQYVYYKLWLRKC	15.0	47.0	196.0
MCHNHLFYYRVFHSC	23.0	47.0	195.0
MCHYVWYQWRDNRKC	12.0	41.0	195.0
MCKYRFYSYQYWTFC	10.0	22.0	195.0
MCHEHYYWLYVYGKC	29.0	40.0	195.0
MCWWIKHSIGWYQEC	15.0	36.0	195.0
MCFHRHPYAVHWSIC	13.0	25.0	195.0
MCYTRHPFHQNWQLC	25.0	54.0	195.0
MCLKWHFIPHSIYHC	38.0	51.0	195.0
MCYNWLWYSYQRRLC	22.0	31.0	194.0
MCKFHWHWWRDYRQC	20.0	47.0	194.0
MCKYHLDLFYYLQFC	16.0	24.0	194.0
MCKRHLLYWKLQLKC	9.0	53.0	194.0
MCKTHLFYYLLVQSC	32.0	48.0	194.0
MCYTRRWEWQNWSYC	10.0	26.0	194.0
MCYYHLWYKYRRRQC	18.0	42.0	194.0
MCEHRVNKYAEWQPC	11.0	39.0	194.0
MCEYRHKFQALWQQC	6.0	25.0	194.0
MCHLKYYLLHIRSC	21.0	57.0	194.0
MCVKARTLWLYKYWC	13.0	51.0	193.0
MCKYIKYYVVWQRNC	14.0	36.0	193.0
MCPYEKLWLQWRRRC	37.0	102.0	193.0
MCYTKAKYDYYWVLC	8.0	42.0	193.0
MCKHYLKYWTVWHFC	10.0	27.0	193.0
MCYTKRSKYDSWRKC	22.0	36.0	193.0
MCFHRRPFAWNWIPC	10.0	35.0	193.0
MCGRFVLYYKLINKC	17.0	39.0	193.0
MCKLHLTYYLLWRRC	11.0	22.0	193.0
MCTHRHKFELTWQQC	23.0	56.0	193.0
MCWHRHKYQQRWHLC	18.0	37.0	193.0
MCKFHTDFFYWRLWHC	17.0	37.0	193.0
MCPSKRQLLYYLVWC	18.0	74.0	193.0
MCNLYYYLLVHQHHC	28.0	49.0	192.0
MCRDIVYYRIWHQHC	21.0	41.0	192.0
MCKRVLQYYLIYHQC	13.0	27.0	192.0
MCYTKRPYDQHWRHC	14.0	32.0	192.0
MCKSKFWTYQYWVVC	25.0	43.0	192.0
MCKEIFYYLLVRRRC	7.0	25.0	192.0
MCRNIYYYLAIRSHC	15.0	35.0	192.0
MCYTKGPYELLWYSC	13.0	35.0	192.0
MCAKSIIWYKLQRSC	17.0	55.0	192.0
MCDLFYYRLIRKQWC	18.0	38.0	191.0
MCYTVFWYQYLRKRC	17.0	33.0	191.0
MCKFKYDLFYFRLFC	18.0	29.0	191.0
MCYTKRPFEVYWQIC	4.0	22.0	191.0
MCKLHVRFYQIIHHC	9.0	24.0	203.0
MCLRHVVYWQIANHC	12.0	47.0	191.0
MCYVQYYRVYRGAVC	15.0	64.0	191.0
MCYTRTYKHQKWSLC	14.0	55.0	190.0
MCDLFWYRTFKRQWC	13.0	46.0	190.0
MCFHRHKFAPDWLFC	20.0	43.0	190.0
MCEKKRVLLYWRFWC	24.0	52.0	190.0
MCEHYVLFYKLFKHC	11.0	30.0	189.0
MCKWHLVLYKLANKC	26.0	61.0	189.0
MCRHLIYYLAQHRKC	11.0	25.0	189.0
MCFHRHPYQQDWFLC	31.0	34.0	189.0
MCKLHILYWKVAKSC	20.0	63.0	189.0
MCDIIIYKILSRTC	19.0	46.0	188.0
MCPKYVKYWLVWTC	30.0	57.0	188.0
MCDKYAIIWYKIHHC	20.0	43.0	188.0
MCHFKFRDQYAAWYC	12.0	51.0	188.0
MCWWVQHPNWWIQLC	45.0	50.0	188.0
MCKNHYYLAYYRAFC	21.0	51.0	188.0
MCAKYFVIWRQRLPC	34.0	70.0	187.0
MCFWQHWYQYRKRKC	11.0	36.0	187.0
MCQRHVFYYRLIHQC	13.0	32.0	187.0
MCRYEKLANFWEFKC	21.0	38.0	187.0
MCYNILWYKYLYRQC	10.0	13.0	187.0
MCVYEFTFQDQHIHC	10.0	29.0	186.0
MCTKRLVAYWKIWSHC	18.0	39.0	186.0
MCKHLFYYTLFHRVC	13.0	55.0	186.0
MCKRHVLYYKLQKQC	30.0	61.0	186.0
MCYYRHKFGTVWQHC	9.0	31.0	186.0
MCKAELFYYLLYHKC	15.0	32.0	186.0
MCLLYYKIHHRQLHC	21.0	46.0	186.0
MCTHRHKYEVYWRQC	33.0	47.0	185.0
MCYTKTNYWDVWQPC	7.0	31.0	185.0
MCTHRHKYQAHWSVC	18.0	38.0	185.0
MCWHRHKFQKQWFIC	11.0	24.0	185.0
MCKRHVLYYSLWLQC	20.0	32.0	185.0
MCEYRHPYEAYWKAC	7.0	27.0	185.0
MCYYEIVFDTVYHYC	10.0	26.0	185.0
MCEYSFQFGYRRIYC	19.0	30.0	185.0
MCKRVLTYYLLYQSC	27.0	55.0	185.0
MCLKWVQLYRAFKAC	26.0	47.0	184.0
MCYHRHPYLTVWETC	22.0	42.0	184.0
MCYTKSYFQKRWSIC	14.0	26.0	184.0
MCKYDKDRWFYIIWC	38.0	77.0	184.0
MCYDLYYYLLYTKHC	8.0	28.0	184.0
MCYHLVYYRAYRRQC	27.0	42.0	184.0
MCKRQVVYYQIYKRC	14.0	34.0	183.0
MCKYVLFYKVQQRNC	27.0	52.0	183.0
MCREVRFYQLIRSYC	12.0	40.0	183.0
MCFHKHPYQQHWEQC	18.0	69.0	183.0
MCKHLFYWSLFNKQC	12.0	46.0	183.0
MCEVKYFLLWKGFFC	17.0	45.0	183.0
MCYYKHRYELYWHLC	8.0	34.0	183.0
MCARHLIYWKLYHLC	19.0	32.0	183.0
MCKREVLYYYLLWNC	16.0	47.0	183.0
MCYHRHVFQRRWRHC	11.0	27.0	183.0
MCKQLFYYYLHRRSC	6.0	24.0	183.0
MCYTRHKFGSVWREC	12.0	59.0	183.0
MCRYVKYYLLYRSAC	27.0	74.0	331.0
MCKFKLDLFYYGLVC	22.0	32.0	182.0
MCDLYYYLVWSRRVC	42.0	50.0	182.0
MCYNFRWYQWQRRYC	24.0	71.0	182.0
MCKRLVAYYRTWSFC	27.0	41.0	182.0
MCYHRHKFDSTWRSC	18.0	26.0	182.0
MCGKYYVQYYRVARC	14.0	34.0	182.0
MCVSAYKVHWKWLRC	21.0	47.0	181.0
MCVQHLFYYRLYRRC	19.0	54.0	181.0
MCYTRQYKWQVWWTC	20.0	34.0	181.0
MCENTSIIWYKLQYC	15.0	37.0	181.0
MCYTRHPYERVWHQC	48.0	77.0	181.0
MCKTHLYYYLLAYKC	36.0	47.0	181.0
MCTYEFLFDTTRVHC	16.0	31.0	181.0
MCEHLFFYRIWLRTC	25.0	39.0	181.0
MCVYDILFNRVVIHC	10.0	22.0	181.0
MCAYHLTYYKLWHRC	17.0	32.0	181.0
MCKKRLLTYYRIWHC	16.0	66.0	181.0
MCREIVYYRVFSASC	25.0	46.0	181.0
MCKQRHPYINYWFPC	13.0	38.0	181.0
MCHYTWFDWQDWRLC	19.0	41.0	181.0
MCYEAIGSYYWWSYC	18.0	28.0	180.0
MCEHRHPYYQHWQRC	15.0	36.0	180.0
MCYKIWQPHILWWAC	18.0	36.0	179.0
MCYYEITYFNYGWNC	13.0	23.0	179.0
MCFHRHKYQSEWFLC	21.0	49.0	179.0
MCYHRHPFYLNWFSC	13.0	25.0	179.0
MCFKNVYNSVFVYC	22.0	41.0	179.0
MCKIYYIHRKFYWAC	15.0	45.0	179.0
MCYYYKLSDYWVLSC	27.0	38.0	179.0
MCDKHLWYYLNFHRC	10.0	37.0	179.0
MCKQRHFYYFLYYDC	22.0	76.0	179.0
MCYKNLETGLFVYC	41.0	84.0	179.0
MCKYYVSYYRAIRSC	11.0	37.0	178.0
MCPYRFVQYYRAFKC	34.0	59.0	178.0
MCVYDFLFADVNIIC	10.0	19.0	178.0
MCKRLFTYYRIFHYC	21.0	32.0	178.0
MCYHRFKFDNYWHNC	11.0	36.0	177.0
MCNHLYYYLVWHKVC	19.0	29.0	177.0
MCHPANFYWYRYWDC	3.0	32.0	177.0
MCWYVKLYDFWQRVC	43.0	67.0	177.0
MCYNVYWYRYRYAQC	20.0	23.0	177.0
MCYHRHKYQTHWSAC	19.0	29.0	177.0
MCYTRYKFERYWHQC	18.0	36.0	177.0
MCYKYLQYYLIFNSC	15.0	29.0	177.0
MCTHRHKYQKYWAPC	13.0	41.0	177.0
MCFWIKAWRGYVRIC	16.0	28.0	177.0
MCYTKGRYDFAWSPC	18.0	43.0	177.0
MCHIHLAYYRAWRKC	26.0	47.0	177.0
MCYTRDKYDTVWQLC	15.0	37.0	177.0
MCKAAFYSYQYWHAC	14.0	38.0	177.0
MCHKRALYYYLLSIC	6.0	35.0	176.0
MCREVHYYRIIRFSC	17.0	41.0	176.0
MCYHRGPYQIQWHQC	17.0	28.0	176.0
MCHHYILFYKIFQKC	18.0	25.0	176.0
MCVWKRDLFYYLHFC	17.0	35.0	176.0
MCLYVQFYRSFLRKC	17.0	29.0	176.0
MCWWFRHELYWHQQC	17.0	40.0	176.0
MCYFHKVAAFWVIEC	17.0	31.0	176.0
MCHTRHPYELFWQRC	24.0	33.0	176.0
MCYHRFKFELIWRHC	13.0	22.0	176.0
MCRRHLFYWSIWHKC	13.0	39.0	176.0
MCYTRHPLQGDWYTC	27.0	46.0	175.0
MCTHRHKFQFEWLFC	12.0	24.0	175.0
MCKYAKYFIVFRQHC	27.0	30.0	175.0
MCYELYWYQVQRRWC	41.0	84.0	175.0
MCRYVIYYQIIRRQC	7.0	38.0	175.0
MCQRQLFYYLHWHKC	35.0	45.0	175.0
MCRHVYYYILSHRYC	13.0	26.0	175.0
MCKDLPSQWHFWWIC	30.0	56.0	175.0
MCGSDHYRWSRWWVC	25.0	44.0	175.0
MCKHKKALWLYSLWC	32.0	48.0	175.0
MCYYWSYIYSQQRHC	28.0	51.0	174.0
MCWVLYYKVQRGRQC	24.0	43.0	174.0
MCYYWQYIYENQIAC	13.0	23.0	174.0
MCWHRPPFQILWHEC	17.0	52.0	174.0
MCYTRRYVWQHWKLC	16.0	52.0	174.0
MCHVHYYRIWRRTC	13.0	39.0	174.0
MCEHRHPYLNHWFIC	10.0	22.0	174.0
MCTHRHKYIPLWHQC	10.0	30.0	174.0
MCFHRHPFVQHWSQC	10.0	38.0	174.0
MCHIVYYKVWRKFVC	9.0	46.0	174.0
MCFHRHKYEVYWQKC	8.0	21.0	174.0
MCKVHLFYYRLHTSC	12.0	47.0	174.0
MCQSNFYWYRYWVSC	20.0	35.0	174.0
MCWHRENYFVPWLRC	9.0	29.0	174.0
MCYEVLFYKLFRSSC	24.0	26.0	173.0
MCYVHIWRIWHRRQC	15.0	32.0	173.0
MCVHRHPYHDRWQSC	14.0	28.0	173.0
MCKRLLTYFLLHKSC	11.0	38.0	173.0
MCYHRHPYSALWFQC	21.0	20.0	173.0
MCVLYRHRDYSYWSC	15.0	31.0	172.0
MCYTRRFWWNEWRSC	21.0	50.0	172.0
MCNKRYLTYYRLWHC	23.0	50.0	172.0
MCHVWFVEKRFLHVC	23.0	51.0	172.0
MCYTKSNRWDFWREC	12.0	40.0	172.0
MCKREVVYWKIFKQC	19.0	62.0	172.0
MCRHIIYYRAYRRVC	10.0	49.0	172.0
MCYDVLWYKYIWSKC	26.0	46.0	172.0
MCYYDFILGNVKVIC	16.0	24.0	172.0
MCYTHLWYKYERRRC	33.0	48.0	172.0
MCHYHPYSWLWIVPC	14.0	26.0	172.0
MCFKASFYDYHYWAC	18.0	28.0	172.0
MCPYDYIQYYRVWRGC	32.0	70.0	171.0
MCTHRHRYEYLWHSC	12.0	36.0	171.0
MCRHLVYYRVLHRQC	14.0	69.0	171.0
MCRDIYYWLLVKRAC	15.0	41.0	171.0
MCVKTHFWSYKYWDC	22.0	40.0	171.0
MCHWYTIPFHYVTTC	11.0	53.0	171.0
MCRELFYYKLYSRIC	27.0	39.0	171.0
MCPRHHVFYYRLFLC	16.0	64.0	171.0
MCRETYYYLLVLKQC	25.0	53.0	171.0
MCHHLIYYRAFHRLC	15.0	37.0	171.0
MCYTRHPYDKFWSKC	22.0	41.0	170.0
MCERHRLFYLLFKRC	13.0	48.0	170.0
MCHEIIWYKIQWTC	10.0	25.0	170.0
MCWKSILWYKIAKQC	7.0	17.0	170.0
MCYWFKFYPEGVVFC	13.0	39.0	170.0
MCDLWYYLLVHRHDC	17.0	25.0	170.0
MCYEVQYYRIYRYHC	17.0	33.0	170.0
MCRLVLYYRLFNKC	11.0	28.0	169.0
MCKIWFFSNRFHHVC	20.0	30.0	169.0
MCKNHLFYYLLVRC	17.0	31.0	169.0
MCPHHEILIYKILRC	26.0	39.0	169.0
MCYEVLYYKIAHARC	19.0	56.0	169.0
MCSTKRHLLYYLLWC	20.0	27.0	169.0
MCTYEYIFGYYSVNC	30.0	45.0	169.0
MCDVVLYKILWKHNC	24.0	43.0	169.0
MCIKHLYYYLLFKHC	0.0	4.0	169.0
MCYVWHYREQRWVNC	3.0	27.0	169.0
MCNRVLYYWLLDRRC	28.0	62.0	169.0
MCKFHIRLYQVWRHC	22.0	42.0	169.0
MCHHLFYYLQFNKQC	15.0	43.0	169.0
MCHPVWLYKIVRRYC	19.0	40.0	169.0
MCYTRYNWWERWVLC	21.0	51.0	168.0
MCKKQSFYGFYYWSC	8.0	25.0	168.0
MCAKYHLIYYKVARC	13.0	58.0	168.0
MCKYLFFPWYAVQFC	15.0	17.0	168.0
MCEIRTIIWYKLQYC	13.0	30.0	168.0
MCHEVVYWKVWRTWC	24.0	62.0	168.0
MCYVYLHNGQIAYC	32.0	57.0	168.0
MCKYWSDVYWYRWVC	26.0	43.0	167.0
MCNVTLYKILRQWTC	25.0	59.0	167.0
MCTYRHKFEQYWHQC	10.0	22.0	167.0
MCNKHLVYYIVWNRC	12.0	28.0	167.0
MCRQLYYYRLYKSAC	26.0	58.0	167.0
MCGLYYYLLFKRRAC	17.0	26.0	167.0
MCVPIWLYKLVRYGC	37.0	49.0	167.0
MCRHLYYFLLSRQSC	19.0	23.0	167.0
MCHLYYYLLHKKDVC	21.0	48.0	167.0
MCNVKYFILWRHLC	30.0	56.0	167.0
MCQRVLTYYRIFHAC	53.0	80.0	167.0
MCTYNFHGNYLLIHC	7.0	23.0	166.0
MCLKWKFIPHSIYEC	17.0	54.0	166.0
MCVREVLFYKLLYC	18.0	37.0	166.0
MCEHRHPYTAIWRPC	10.0	20.0	166.0
MCYVWHFKKQQWKHC	13.0	36.0	166.0
MCYEYVFGYVTISAC	18.0	35.0	166.0
MCHRHVQYWRVFHKC	32.0	75.0	166.0
MCFWIKNFKFWQQVC	21.0	26.0	166.0
MCYSVLWYRVLKAKC	26.0	42.0	166.0
MCEVIWYKIQWLQDC	15.0	23.0	166.0
MCFDILWYKYYRRNC	16.0	20.0	166.0
MCFHKHIYESLWRPC	18.0	33.0	166.0
MCHRHIYYYLIHKSC	16.0	30.0	166.0
MCPYWVLYYKIAHAC	17.0	37.0	166.0
MCYYTYTLGYSAVFC	14.0	19.0	166.0
MCYYEVFWYQHRRRC	19.0	21.0	166.0
MCEIWFVAKQFVHVC	19.0	29.0	165.0
MCAKQVLFYKIWRKC	24.0	34.0	165.0
MCENFNVLYYKIQYC	20.0	27.0	165.0
MCKNLFWYLHWRKRC	20.0	38.0	165.0
MCLHRHKFWTGWRPC	14.0	50.0	165.0
MCGRALYYWSLFHKC	27.0	57.0	165.0
MCYHRHPLETVWLSC	27.0	44.0	165.0
MCYTRRFGWEQWLRC	14.0	40.0	165.0
MCHVQYYRIWQRILC	14.0	22.0	165.0
MCRHLAYYIIWQAKC	16.0	27.0	165.0
MCDYSRLWWYRWQRC	28.0	46.0	165.0
MCYLYEHQDWSAWYC	13.0	35.0	165.0
MCRLVAYYRAYRRHC	19.0	43.0	165.0
MCHRHPIWPTWLWHC	21.0	36.0	165.0
MCRNVLYYVLVRHHC	23.0	54.0	165.0
MCWWFNNGYGWIQLC	16.0	33.0	164.0
MCHRHLLYYLVAKQC	16.0	34.0	164.0
MCDEIIIYKIYRRYC	11.0	30.0	164.0
MCLYEYILGTVNVQC	10.0	29.0	164.0
MCYEFTLGQQEVFFC	17.0	31.0	164.0
MCFYDIRNRIIVYC	40.0	49.0	164.0
MCLDYITIYKILRHC	10.0	23.0	164.0
MCKFVKDLWLWKRFC	16.0	35.0	164.0
MCFNVLWYQYQYTQC	33.0	86.0	164.0
MCTHRYKFSQIWLQC	7.0	30.0	164.0
MCKRHIVYYLAFQQC	23.0	39.0	163.0
MCKEILYWKIWQRQC	20.0	42.0	163.0
MCYAVHWYKYQRKC	22.0	29.0	163.0
MCPHLYYYLIWRKC	28.0	38.0	163.0
MCKRHVYYWLLWHRC	11.0	21.0	163.0
MCHLHLFYYKLLHHC	15.0	28.0	163.0
MCKRWVYYWKLIRQC	6.0	16.0	163.0
MCNYEFVFDQLFVHC	9.0	35.0	163.0
MCKKYIKYWNVWHTC	30.0	33.0	163.0
MCFKDFAYVWWFQRC	25.0	30.0	163.0
MCHHLFYYLIANRRC	19.0	31.0	163.0
MCYTVYWFQYQRRRC	10.0	39.0	162.0
MCPRHVFYYLLQFQC	22.0	41.0	162.0
MCVQRHKFELHWHHC	8.0	25.0	162.0
MCGWFVQLYRVQHSC	8.0	35.0	162.0
MCYTRHPFDYKWHTC	24.0	35.0	162.0
MCRIVQYYRIFQRSC	24.0	35.0	162.0
MCYTRYTKFEPWREC	12.0	34.0	162.0
MCLYEFLFHELHVVC	21.0	30.0	162.0
MCEIWYFKRQFHFVC	5.0	22.0	162.0
MCTYVYELGFAGVYC	9.0	22.0	162.0
MCPKLVAYWRVWKKC	27.0	39.0	162.0
MCYVWHFRYHNWQHC	11.0	34.0	162.0
MCYTRSHKWEYWQLC	22.0	43.0	162.0
MCEHRHPYQWFWQQC	8.0	35.0	162.0
MCLDLFYYKLINRWC	25.0	39.0	162.0
MCNKILTLYRVWRAC	18.0	37.0	162.0
MCKYVFTLGQIVVQC	9.0	34.0	161.0
MCWHRHPYVPNWQYC	12.0	33.0	161.0
MCKRQIVYYLINYSC	22.0	39.0	161.0
MCEIKKHLFYYLIHC	12.0	38.0	161.0
MCVYVTYWKAFNRRC	12.0	33.0	161.0
MCHYRHKYEFLWHVC	21.0	46.0	161.0
MCNLFYYRVWRKFQC	27.0	50.0	161.0
MCLYNFYGYRYWVKC	16.0	30.0	161.0
MCFQRHKFDPLWHFC	13.0	36.0	161.0
MCTYEFTFNRVRSYC	14.0	32.0	161.0
MCRHVFYWKLFHQQEC	7.0	40.0	161.0
MCKDHLFFYLLNRAC	13.0	36.0	160.0
MCKLVAYYRIWHQYC	22.0	27.0	160.0
MCVLREFYSYYYYEC	8.0	19.0	160.0
MCEKYYENWYLYLWC	35.0	66.0	160.0
MCYTRHKFASVWQQC	17.0	42.0	160.0
MCYTHHPLEFRWSKC	25.0	43.0	160.0
MCQREYLYYYLLNIC	27.0	48.0	160.0
MCEVWFFGHNFHYVC	20.0	32.0	160.0
MCKKYVKYWTVWQQC	14.0	34.0	160.0
MCVWPKWLTKFILRC	48.0	31.0	160.0
MCYEIQYYRVWRQFC	33.0	58.0	160.0
MCYTRLFKWQNWQSC	12.0	40.0	159.0
MCHHIVYYRIAHRKC	11.0	38.0	159.0
MCFYRHPLQPHWVHC	10.0	22.0	159.0
MCWHRHPYNRFWQKC	12.0	39.0	159.0
MCYEVLWYKWTRRC	85.0	47.0	159.0
MCKEVYYYKLFLKFC	11.0	21.0	159.0
MCYTRHPYEQVWSTC	20.0	36.0	159.0
MCKNRHIVYYRAFLC	15.0	57.0	159.0
MCYQRHIFQTDWHSC	16.0	25.0	159.0
MCPNVRTLLYWKIWC	13.0	48.0	159.0
MCNRHIYYYIINRVC	11.0	26.0	159.0
MCNAEYLFYYLIARC	8.0	28.0	159.0
MCEVIWYKIHRQLFC	15.0	31.0	158.0
MCYHKFPYSWFWQPC	17.0	27.0	158.0
MCREIHYYRIWLKNC	28.0	25.0	158.0
MCREIYYYALIHRWC	10.0	35.0	158.0
MCYHSHPLFQNWQHC	21.0	34.0	158.0
MCYTRHRFEQWWQSC	21.0	39.0	158.0
MCWWIRNIAGWYKLC	15.0	34.0	158.0
MCWWFKSNWYWHKQC	16.0	25.0	158.0
MCWHRHPLAERWSLC	25.0	49.0	158.0
MCEHKQAWSAIWWPC	11.0	32.0	158.0
MCYNIHWYRWIRRRC	7.0	6.0	158.0
MCLYDFTFNQLFIKC	17.0	33.0	158.0
MCAVRYYQIYKRFLC	14.0	37.0	158.0
MCFNATIVKWFLSNC	21.0	31.0	158.0
MCKYHVQFYRIWLRC	13.0	17.0	158.0
MCYHLYYYLSYKKHC	6.0	41.0	174.0
MCYTRKPFQTQWHKC	25.0	36.0	157.0
MCYVSLWYTYQRKKC	18.0	28.0	157.0
MCIKWHFLHKNWREC	23.0	55.0	157.0
MCHYEFVLGHTKILC	14.0	21.0	157.0
MCVYEFTGSYAFVKC	6.0	25.0	157.0
MCYHRPPFQQRWYLC	17.0	36.0	157.0
MCDKWVIYYKVAVRC	12.0	36.0	157.0
MCWTKRPDQTRWYKC	12.0	45.0	157.0
MCWFYVPSDHRHIYC	14.0	11.0	157.0
MCHVFYYKVWKRLQC	13.0	36.0	156.0
MCDYRAIWWYKIQVC	18.0	28.0	156.0
MCYTRHKFVQIWREC	36.0	40.0	156.0
MCYAKFWYIYQHRKC	15.0	26.0	156.0
MCKRSAFFGFNYWSC	10.0	46.0	156.0
MCGWYYYNKSWYLHC	38.0	73.0	156.0
MCEHYYPFQFFWQAC	14.0	27.0	155.0
MCWHRHIYSPLWQHC	16.0	31.0	155.0
MCENHLFYYRLFHAC	12.0	24.0	155.0
MCRPWLYYYLLHKSC	15.0	36.0	155.0
MCRHVYYFLIQRRSC	15.0	19.0	155.0
MCHLYYYLLHLRGKC	20.0	26.0	155.0
MCHEYSIIWYKINYC	20.0	26.0	155.0
MCREIRYFQLWHRQC	19.0	51.0	155.0
MCREVRYFQLWYREC	31.0	48.0	155.0
MCPYFVKYWLVARYC	36.0	30.0	155.0
MCYKSIWDGRFIYC	10.0	33.0	155.0
MCTYKHPFELHWHLC	14.0	28.0	155.0
MCKYVKYYLIFRKHC	4.0	12.0	155.0
MCLPFKYFWLWQRSC	50.0	62.0	155.0
MCTTRASKWDRWHVC	17.0	43.0	154.0
MCPFVLQWYKYQRKC	13.0	24.0	154.0
MCKRHYVYYLHWIRC	10.0	26.0	154.0
MCNKWVVLFKVVRKC	24.0	37.0	168.0
MCYTRQWYWLPWEIC	21.0	42.0	154.0
MCVLHWHRDYAYYTC	12.0	28.0	154.0
MCKFKRDLAYYLAFC	14.0	13.0	154.0
MCHTRHNKFEHWVPC	20.0	45.0	154.0
MCYTIDYWYRTWHKC	7.0	20.0	153.0
MCVYEYVFHKSSITC	14.0	42.0	153.0
MCKDKWHLYLYFLHC	11.0	34.0	153.0
MCWHRHKFEPEWYLC	12.0	32.0	153.0
MCDVLIYKILRISQC	24.0	49.0	153.0
MCYNKRLVQYYRVWC	24.0	50.0	153.0
MCRRHILYYQIVHKC	9.0	34.0	153.0
MCKLAFYGYRYWVKC	10.0	36.0	153.0
MCYHRHKFESFWHLC	16.0	28.0	153.0
MCVYEFVFGSGTVHC	22.0	42.0	153.0
MCTYAEVWWFRRFKC	13.0	34.0	153.0
MCEHKGPYDLFWRTC	11.0	28.0	152.0
MCEHRHKFHPYWRSC	9.0	24.0	152.0
MCYEVAYYRAFRWC	22.0	32.0	152.0
MCWYIQYPKHWVRSC	12.0	38.0	152.0
MCKKHVVYWRLWKLC	6.0	25.0	152.0
MCWHRHKFQVQWQHC	12.0	36.0	152.0
MCDKWVIIYKVWRKC	6.0	18.0	151.0
MCYKHIKYFLLWKYC	14.0	16.0	151.0
MCKQVLYYLLWQKLC	18.0	34.0	162.0
MCKVHLFYYQIQHRC	15.0	42.0	151.0
MCWWIKRSDFWLRYC	11.0	19.0	151.0
MCWKHVIWYKITRQC	21.0	27.0	151.0
MCWVNVRPGTWFQFC	39.0	56.0	151.0
MCDLYYYLLWNRQC	25.0	42.0	151.0
MCHYVIYYQAWRARC	19.0	30.0	151.0
MCTHKHPYSQVWLHC	21.0	33.0	151.0
MCYYKEIALYKAWRC	33.0	43.0	151.0
MCDRVQLYYYLIHLC	24.0	46.0	151.0
MCYYKHRFALQWKHC	6.0	20.0	150.0
MCKFVKYWVAYRTKC	14.0	21.0	150.0
MCTYDYILGYLQLHC	22.0	38.0	150.0
MCEHKHPFDTLWHPC	18.0	30.0	150.0
MCPREVLYYKIWKHC	23.0	57.0	150.0
MCENLFYYLWYRKKC	20.0	31.0	150.0
MCDFNIIWYKIRRTC	15.0	14.0	150.0
MCHKRRALFYYLHWC	34.0	66.0	150.0
MCPYLYVQFYRTFHC	47.0	50.0	150.0
MCHFKRDLLYYFINC	8.0	17.0	150.0
MCWEKAILWYKIHKC	14.0	27.0	150.0
MCNHVIYYKIIRRLC	18.0	61.0	150.0
MCVVYYKIWRRQQNC	5.0	17.0	149.0
MCSKQLYYYLLWKSC	31.0	34.0	149.0
MCGRYHLFYYLISQC	12.0	26.0	149.0
MCYTKKPKDRFWRSC	20.0	44.0	149.0
MCEKVHLYYWKLWQC	17.0	38.0	149.0
MCKQHFFNFQYWVLC	16.0	24.0	149.0
MCLHRHKFEQLWWHC	11.0	31.0	149.0
MCNRYIQYYRVILSC	11.0	41.0	149.0
MCYYKKLHVFWVKDC	17.0	38.0	149.0
MCRYIQYYRIHRRDC	19.0	41.0	149.0
MCYTRQHYWDKWQVC	28.0	39.0	149.0
MCKKHFLYWLLVHRC	10.0	13.0	149.0
MCEEQRHLYYYLLVC	6.0	29.0	149.0
MCHRHKFYYLIWRRC	10.0	40.0	148.0
MCFHRHPFWSRWLDC	33.0	48.0	148.0
MCWWYKIHHFWKQDC	11.0	24.0	148.0
MCEDLFYYLLHHKC	9.0	19.0	148.0
MCYTRATKWDYWVIC	16.0	38.0	148.0
MCEHRHKFELYWNLC	7.0	23.0	148.0
MCHLFYYLQFKKQDC	10.0	43.0	148.0
MCYHRHFLELHWRSC	7.0	22.0	148.0
MCDLFYYLLHHAYKC	15.0	31.0	148.0
MCKALYYYLLYKSSC	11.0	15.0	148.0
MCNYRHKFEPYWHQC	7.0	26.0	148.0
MCWFYVAADKRHIFC	22.0	35.0	148.0
MCRLVLYYRLYQQHC	25.0	38.0	148.0
MCEHQYPYWDLWFPC	17.0	31.0	148.0
MCKTDFYSYYYYVVC	10.0	39.0	148.0
MCNRHLVYYLAFYKC	11.0	22.0	148.0
MCKRHLLFWKIFQC	27.0	60.0	147.0
MCKHKLYLKYYQLWC	28.0	74.0	147.0
MCKQLYFYRIWRRIC	8.0	17.0	147.0
MCKRHIQYWRIYHYC	15.0	15.0	147.0
MCYNIYWYKYQARSC	22.0	30.0	147.0
MCKRLIHYYRIHIKC	9.0	24.0	147.0
MCLYDFIGSDYWVYC	10.0	30.0	147.0
MCYHRHIYWQYWEQC	22.0	44.0	147.0
MCEHQFPYWDAWFPC	20.0	43.0	147.0
MCKFIKYWSIWQTC	3.0	17.0	147.0
MCYTRHLFEPLWRSC	12.0	40.0	146.0
MCHDKRALYYYLLIC	19.0	54.0	146.0
MCVKGSFYRFYYWSC	13.0	22.0	146.0
MCVYNYELGRSWIDC	8.0	20.0	146.0
MCEVIWYKLQKRYHC	9.0	27.0	146.0
MCYATLWYRVRYKAC	22.0	44.0	146.0
MCRLVLYYQLVQRKC	25.0	57.0	145.0
MCDKTLWLYRLWHRC	27.0	67.0	145.0
MCHHRHLAYYRVWLC	14.0	39.0	145.0
MCFYEKLSNFWIRRC	51.0	46.0	145.0
MCQEHVLYYLINRYC	9.0	30.0	145.0
MCLHRANYFEYWRHC	24.0	42.0	145.0
MCWKDNFYTYVYWDC	13.0	42.0	145.0
MCKHLLYYLIWHSEC	20.0	18.0	145.0
MCVHRHRFQTSWQSC	11.0	24.0	145.0
MCFHKHLFQRFWRSC	37.0	53.0	145.0
MCWTKRPYTQFWYKC	22.0	35.0	145.0
MCYYIFELGYAARFC	12.0	39.0	145.0
MCYTKYYYWENWQLC	14.0	23.0	145.0
MCYTRTYRWEAWQPC	16.0	41.0	145.0
[truncated: 17,334 more rows]

## Sheet: NNK_FGF-R1C_X_FGF-R3
Sequence	FGFR1C_X_FGFR3C_reads_R5
MCRLCFSKLFWCC	1107735
MCIYRLSDFWVVC	337177
MCTRTSFYGFWYYAC	105406
MCYKCFTGLFLCC	48693
MCWYCFRKSFWCC	24450
MCVPCFSHTFLCC	24642
MCCFKFRDLFWVC	13989
MCVRCFDQLFWCC	11967
MCRLCFSRLFWCC	11542
MCCYRCWSLFWCC	11246
MCRLCFSKLFLCC	8905
MCRLCFNKLFWCC	8516
MCRLCFGKLFWCC	6891
MCFVYPRRQPLYWIC	6179
MCFRWRLFHHLTPYC	5639
MCHLCFSKLFWCC	6678
MCFSCFCHTFYCC	7417
MCFSCFSKQFWCC	6537
MCCLCFSKLFWCC	5957
MCYICFSGLFYCC	5794
MCRSCFSKLFWCC	5102
MCYKWPIRSHLYWLC	3466
MCFRCFLASFWCC	4538
MCFHCFASRFWCC	4578
MCRLCFSKPFWCC	4455
MCSNMWKLANRWWVC	3399
MCVYRLSDFWVVC	2931
MCIRWPARQPLFWLC	3337
MCLPCFSHLFLCC	4541
MCRLCFSKLFRCC	4477
MCCFKFRDLFWIC	2896
MCRLCFSKLFWRC	2932
MCRLRFSKLFWCC	3180
MCIYRLSDLWVVC	2710
MCSNMWKLANRWWAC	2415
MCFRCFACLFWCC	2505
MCYVCFSHSFICC	3527
MCFVCFRHSFLCC	2991
MCRLCLSKLFWCC	3637
MCRLCFSKLFWCCGC	3007
MCRLCFSKLFCCC	3572
MCRLCFSKLLWCC	3648
MCCYNLFSLFWAC	2181
MCRLCFSKLFWGC	1587
MCRLCFSELFWCC	2215
MCIYRLSDFWAVC	1467
MCRLCFCKLFWCC	1888
MCTRTSFYGFRYYAC	2569
MCRLWFSKLFWCC	1999
MCWHCFRKSFWCC	1684
MCRLCSSKLFWCC	1814
MCRLCFSKLSWCC	1737
MCTKFPWPFPIFWAC	1233
MCCTRFVNLFWLC	1728
MCRLCFRKLFWCC	3527
MCRLCFSKLFWC	1078
MCYVCFEHRFLCC	1603
MCRLCFSKLFWFC	1604
MCIYRLSDFWVMC	998
MCYRHPHSNPLFWAC	1000
MCTYRLSDFWVVC	1102
MCRMCFSKLFWCC	1556
MCVRWPNLNALFWLC	1007
MCRLCFSKLFWWC	942
MCIRWPARQSLFWLC	1280
MCRLCFSKLYWCC	1511
MCCTPCYGLFHCC	1437
MCLICFRRLFYCC	1391
MCIGKWYTYQYWTRC	1189
MCIYRLSDFWVVCGC	1062
MCRLCFSKLFWYC	1284
MCFSCFRHTFYCC	1509
MCWYCFRKSFLCC	1114
MCIYRLSDFWVLC	1452
MCRLCFSKLFYCC	1200
MCYKCFSKLFWCC	1071
MCRLCFSKLCWCC	1097
MCLPCFMHLFLCC	1070
MCARTSFYGFWYYAC	1189
MCFYRLSDFWVVC	777
MCSQSWVLYELWRVC	789
MCYKCFTGLFICC	1062
MCIYRLSDFCVVC	881
MCLLWTRHFDRYWVC	894
MCRFCFSKLFWCC	1004
MCIYRLSDFLVVC	814
MCTRTSFYGFWYYVC	1049
MCRLCFSKFFWCC	1082
MCFRWRLFHHLTPFC	689
MCSLCFSKLFWCC	970
MCWPCFARSFLCC	893
MCIYRLSDVWVVC	717
MCIYRLPDFWVVC	700
MCRLCFSKLFC	585
MCIYRLSDFWCC	759
MCIYRLSDFWVAC	698
MCTRTNFYGFWYYAC	819
MCTRTSFYGFWYHAC	876
MCRLCFSNLFWCC	1110
MCIYRLSDSWVVC	652
MCIYRLSDFRVVC	766
MCIYRSSDFWVVC	555
MCRLCCSKLFWCC	882
MCRLCFSKLFGCC	754
MCRVCFSKLFWCC	768
MCLYRLSDFWVVC	511
MCRLCVSKLFWCC	743
MCRLCFSKLFWSC	658
MCIYRLSDCWVVC	508
MCIHRLSDFWVVC	476
MCIYRLSEFWVVC	558
MCRLGFSKLFWCC	694
MCSRTSFYGFWYYAC	603
MCRLCYSKLFWCC	637
MCRLCFSKRFWCC	644
MCRWCFSKLFWCC	600
MCRLYFSKLFWCC	540
MCIYRLSDFWGVC	458
MCIYRLSGFWVVC	421
MCIYRLSDFWIVC	381
MCTRTSFYGFWYYDC	427
MCVPCFSRTFLCC	483
MCCVRYLARFWLC	407
MCRLSFSKLFWCC	530
MCRLCFSMLFWCC	464
MCVRCFDRLFWCC	429
MCRLCFSKHFWCC	506
MCRLCFSKLVWCC	486
MCRLCFIKLFWCC	469
MCCFKFRDLFWCC	391
MCIYRLSDYWVVC	339
MCIYCLSDFWVVC	326
MCFLCFSKQFWCC	428
MCTRTCFYGFWYYAC	406
MCIYRLSNFWVVC	301
MCRLCFSKLFWVVC	303
MCFRFPTRCPLFLLC	373
MCMRTSFYGFWYYAC	417
MCIYRLSDFWFVC	309
MCRLCFSKLIWCC	390
MCRLCFSKLFWVC	509
MCIYRLLDFWVVC	272
MCFVCFRHSFWCC	332
MCLLCFSKLFWCC	349
MCRLCISKLFWCC	405
MCMKCFRYRYWCC	329
MCIYRLTDFWVVC	246
MCRLCFSKIFWCC	308
MCCFKLCSLFWVC	210
MCIYRLSDIWVVC	236
MCCSRCFKSFLCC	263
MCRLCFSKLFWLC	589
MCIYRLSDFWDVC	247
MCLPCFRHLFLCC	380
MCTRTSFYGYWYYAC	325
MCIYHLSDFWVVC	226
MCTRASFYGFWYYAC	278
MCIYRLSDFWVGC	248
MCIFRLSDFWVVC	215
MCTKFPWPFPIFWVC	220
MCTRTSFYGFWDYAC	321
MCTRTSFYGFLYYAC	291
MCCYRLSDFWVVC	191
MCIYRLSYFWVVC	203
MCTRTSFYGFWYYTC	242
MCRLCFTKLFWCC	238
MCFPCFCFTFLCC	322
MCRLCFSQLFWCC	251
MCMYRLSDFWVVC	178
MCRPYPRFQPLFLLC	188
MCHKCFTGLFLCC	235
MCGLCFSKLFWCC	241
MCIYRWSDFWVVC	197
MCIYRFSDFWVVC	188
MCYVCFSKLFWCC	226
MCFSCFSKLFWCC	322
MCIYRLSDFWVIC	252
MCYKCFAGLFLCC	230
MCTRTSFYGLWYYAC	411
MCFRCFARLFWCC	192
MCKRTSFYGFWYYAC	187
MCIYRLSDFGVVC	146
MCTRTSLYGFWYYAC	350
MCCYRCWSLFLCC	263
MCICRLSDFWVVC	159
MCTKFPWPFPIFWCC	174
MCPRTSFYGFWYYAC	222
MCIYRLADFWVVC	140
MCTRTSFYGSWYYAC	185
MCTRTSFYGFWHYAC	205
MCWSLYRLFWAC	229
MCTRSSFYGFWYYAC	191
MCYRHPHSNPLFWVC	140
MCRLCFSKLFFCC	243
MCTRMSFYGFWYYAC	192
MCTRTSFHGFWYYAC	193
MCFVCFSKLFWCC	201
MCRLCFSTLFWCC	215
MCRYCFRKSFWCC	222
MCIYRMSDFWVVC	124
MCTRTSFYGFCYYAC	236
MCFRWRLFHHLTPCC	136
MCVRCFNQLFWCC	319
MCIYRVSDFWVVC	138
MCSYGSWYGYSYLAC	167
MCFVYPRRQPLFWIC	142
MCTKFPWPFPIFWLC	192
MCFVCFRASFLCC	188
MCRFKFRDLFWVC	154
MCTRTSFYGFWCC	170
MCVRWRYWPAWLC	123
MCFVYPRRQPLYWLC	119
MCTRTGFYGFWYYAC	155
MCTRTRFYGFWYYAC	351
MCIYRLSDFWVEC	110
MCWYCFQKSFWCC	156
MCIRWPARQPLFWIC	109
MCVHCFDQLFWCC	189
MCNYRLSDFWVVC	114
MCIYRLSVFWVVC	103
MCFAYPRRQPLYWIC	114
MCRLCFSKLFWIC	121
MCTRTSFYGFWYYSC	179
MCTRTSSYGFWYYAC	171
MCTRTSYYGFWYYAC	151
MCTQTSFYGFWYYAC	147
MCRKYPWNTAMYWLC	88
MCIRWLNKYWLC	88
MCCKCFTGLFLCC	132
MCRLCFSKLFSCC	144
MCIYRLSAFWVVC	87
MCTRTSFYGCWYYAC	134
MCCTRFVNLFWCC	109
MCTRTSFYGFWCYAC	123
MCVKCFRYRYWCC	108
MCCFKFRDLFWLC	199
MCYRFPSSRHLFWAC	121
MCIGKWYTYQYWTHC	93
MCFSCFSRQFWCC	146
MCVPCFSHMFLCC	122
MCYKCFTGLLLCC	160
MCFVYPRRQPLFWVC	103
MCFVYPRRQPLYWVC	96
MCRLCFSKLFWCCGSGC	111
MCIYRLSDLLVVC	102
MCTRTSFYGFWYCAC	124
MCFVYPRRQPLYWMC	73
MCRYRCWSLFWCC	109
MCIYRLSDFWVFC	107
MCTWTSFYGFWYYAC	111
MCTRTSFDGFWYYAC	108
MCIRCFDQLFWCC	110
MCFKCFTGLFLCC	119
MCFVCFRHLFLCC	118
MCCYNLFSLFWCC	99
MCCFKLRDLFWVC	134
MCRLFFSKLFWCC	91
MCYKRFTGLFLCC	98
MCRFCFSKLFLCC	112
MCPNMWKLANRWWVC	75
MCTRTSFYGFWYFAC	96
MCISRLSDFWVVC	67
MCTRTSIYGFWYYAC	117
MCRLCFSKLFWAC	161
MCYKWPIRSHLYWIC	86
MCFVYPRRQPLFWLC	83
MCWYCFSKLFWCC	87
MCIYRCWSLFWCC	104
MCIYRLSDFWLVC	74
MCTRTSFCGFWYYAC	97
MCRLCFSRLFLCC	101
MCYKCFTGLFPCC	98
MCRLCFGRLFWCC	92
MCIYSLSDFWVVC	68
MCYKCFTGLSLCC	97
MCFRFPTRCPLFLIC	73
MCIYRLSDLCVVC	71
MCTRTSFNGFWYYAC	101
MCYKCFTGLFFCC	89
MCINRLSDFWVVC	64
MCWYCFRRSFWCC	90
MCYKWPIRSHLYWCC	78
MCRRWPSREALYWLC	57
MCTRTSVYGFWYYAC	91
MCCFKCFNLFYCC	70
MCVRCFDQLFLCC	90
MCYKCLTGLFLCC	104
MCCFKFRDLYWIC	67
MCCFKFRNLFWVC	82
MCIPCFSHTFLCC	93
MCRLCFSKLFWCCC	65
MCSYRLSDFWVVC	68
MCRLCFSKLFCFC	84
MCCFKCFNLFFCC	83
MCVPCFSHTLLCC	93
MCFRCFSASFWCC	70
MCTRTSFYGFWNYAC	86
MCYRCFTGLFLCC	87
MCTRTSCYGFWYYAC	93
MCVRWPNLNALFWCC	68
MCCFKFRDLFWAC	73
MCYVCFRHSFLCC	80
MCRLCFNKLFLCC	73
MCRLCFNRLFWCC	74
MCWYCFRKSFWRC	71
MCWYCFRKRFWCC	172
MCFRWRLLHHLTPYC	57
MCRLRFSKFFWCC	69
MCTRTSFYDFWYYAC	70
MCCYRCYRLFFCC	72
MCCIKFRDLFWVC	63
MCRLCFCFSFWCC	76
MCWYCFRKSFWWC	49
MCAQKLFHYVPSC	67
MCFACFRHSFLCC	66
MCIRWPARQSLFWIC	57
MCCYNLFSLFWVC	62
MCPLCFSKLFWCC	78
MCFRCFASLFWCC	60
MCTRTSFYGFGYYAC	90
MCSNMWKLANRWWIC	47
MCYKCFTGLFLCCGC	83
MCYKCFTGPFLCC	72
MCVPCSSHTFLCC	72
MCTRTSFYVFWYYAC	72
MCYKCFTGLYLCC	60
MCTRTSFYCFWYYAC	83
MCVPCFSHTFLCCGC	68
MCYKCSTGLFLCC	70
MCLVCFSNLFWCC	76
MCIYRLSDFWVC	60
MCIYRLSELWVVC	51
MCIYRLSDFWLC	74
MCLYRLSDLWVVC	52
MCWYCFRKSFCCC	77
MCYKCFTGLFLWC	44
MCYKWFTGLFLCC	53
MCFRFPTRCPLFWLC	76
MCAPCFSHTFLCC	73
MCRLCLSKLFWCCGC	81
MCTRTSFYGVWYYAC	68
MCRLCFSKLFLFC	68
MCVRCFGQLFWCC	57
MCYKCFTELFLCC	70
MCYKCFTGLFHCC	57
MCTRTSFFGFWYYAC	92
MCCFKFRDLFWVVC	43
MCYECFTGLFLCC	59
MCVPCFSYTFLCC	53
MCRSCFSRLFWCC	56
MCRLCFRKLFWGC	41
MCWYCFRKSLWCC	96
MCRLCLSKLLWCC	93
MCVRCFDKLFWCC	58
MCCFKFRDLFWMC	41
MCIYRLSDFLVLC	41
MCFHCFAGRFWCC	52
MCRFCFSKLFCCC	70
MCFHCFARRFWCC	74
MCFRCFDQLFWCC	59
MCHLCFNKLFWCC	56
MCRLCFSKLCWGC	40
MCYMCFTGLFLCC	56
MCYKCFTRLFLCC	64
MCTRTSFYSFWYYAC	55
MCCFKFRDLFLVC	63
MCVSCFSHTFLCC	54
MCLPCFSHLFICC	75
MCCYRCFISFICC	61
MCWYCFRKSFRCC	72
MCCTPCYGLFYCC	53
MCCFRFRDLFWVC	45
MCRLCFTGLFLCC	56
MCIRWPARQPLFWCC	38
MCLFHRLYWLVPC	65
MCRLCFSKLFGGC	38
MCFLCFSKLFWCC	55
MCVPCFSHTFLRC	46
MCYRHPHSNPLFWCC	56
MCRFKFRDLFWIC	43
MCLPCFCHLFLCC	57
MCARCFDQLFWCC	65
MCRLCFSKLLWGC	43
MCRYCFSKLFWCC	53
MCRLCFGKLFLCC	53
MCFVYPRRQPLYWCC	44
MCWYCSRKSFWCC	58
MCWYCFRKLFWCC	51
MCHLCFSKLFLCC	49
MCRLCFSKVFWCC	58
MCVPCFSHPFLCC	51
MCLRWRLFHHLTPYC	44
MCSICFRRLFYCC	56
MCTRTSFYGIWYYAC	63
MCIYRLSDFCVLC	41
MCRLCFSKQFWCC	99
MCWYCFRKSFWCCGC	48
MCIYRLCFSKLFWCC	60
MCYKCFTGLFLRC	66
MCLLWTRHFDRYWIC	44
MCCLCFSKLFLCC	50
MCCFKFRDLFWFC	44
MCVPCFSHTSLCC	56
MCTRPSFYGFWYYAC	65
MCYKCFSGLFLCC	52
MCVRCFSHTFLCC	59
MCHLCFSRLFWCC	56
MCRLCFSRLFRCC	54
MCRLWCSKLFWCC	67
MCWYCFRKSSWCC	58
MCYKWPIRSHLFWLC	60
MCRLCLSKLFWGC	42
MCRLWFSKLFWCCGC	54
MCYKWPTRSHLYWLC	33
MCVPCFPHTFLCC	53
MCYKWPIRSPLYWLC	33
MCFVCFRHSFLWC	33
MCVRCFEQLFWCC	60
MCIYRLSDFWVVCGSGC	33
MCISCFSKQFWCC	56
MCFHCFANRFWCC	47
MCFSCFSKQFLCC	58
MCVPCLSHTFLCC	48
MCPNMWKLANRWWAC	32
MCVRCFYQLFWCC	45
MCRLRFSKLFWCCGC	43
MCYKCFTGLCLCC	51
MCILHGLIYWAPKQC	32
MCYVCFSHSFIWC	32
MCRSCFNKLFWCC	46
MCWYCLRKSFWCC	60
MCCYRCWPLFWCC	40
MCLSCFCHTFYCC	52
MCRLCFSKLLWCCGC	76
MCRLRFSRLFWCC	43
MCWYCFRKCFWCC	41
MCVRWPARQPLFWLC	37
MCIYRLSDFWFLC	31
MCWYCFRKSFYCC	40
MCVRCFDQPFWCC	45
MCRSCFSKLFLCC	41
MCCTPCYGLFLCC	41
MCYKCFTGLFLC	30
MCIGKWYTYRYWTRC	36
MCWYCFRKSFWYC	45
MCRLCFDQLFWCC	42
MCYKCFTGLFRCC	44
MCIRWPARQSLFWCC	38
MCFVCFRRSFLCC	43
MCIDRLSDFWVVC	35
MCFRWRLFRHLTPYC	36
MCVCCFDQLFWCC	29
MCRLCFRKLCWCC	48
MCCTRCFSHFWCC	42
MCVRCFDQLFWCCGC	37
MCCFKFRDMFWVC	43
MCRLRFSKLFWWC	29
MCYVCFEHRFICC	44
MCVPRFSHTFLCC	36
MCYVCFSHTFICC	41
MCHLCFGKLFWCC	41
MCLPCFGHLFLCC	40
MCRLCFSKLFWCCSC	28
MCLPCFNHLFLCC	42
MCWSLYRLFWVC	36
MCWYCLSDFWVVC	28
MCVPCFDQLFWCC	40
MCRLCFSRPFWCC	38
MCLPCFSRLFLCC	39
MCTKFPWPFPIFWVVC	28
MCRLCFNKLFRCC	35
MCIYCLSDLWVVC	28
MCWYCFRKNFWCC	49
MCFSCFSHTFLCC	36
MCFVCFSNLFWCC	36
MCRLRFSKLFWFC	39
MCYVCFEHQFLCC	34
MCLVYPRRQPLYWIC	33
MCVPCFSHTFPCC	49
MCRPCFSKLFWCC	43
MCIYLLSDFWVVC	27
MCIYRLSDFWAC	56
MCFVYPRRQPMYWIC	33
MCFSCFCKLFICC	42
MCVPCFSHTFLWC	27
MCWYCFRKSFWC	26
MCYNCFTGLFLCC	46
MCRLCFSRLFWRC	26
MCRLRLSKLFWCC	56
MCIYRLSDFWVWC	26
MCWYRFRKSFWCC	41
MCWYCFRKGFWCC	38
MCCLCFNKLFWCC	38
MCRLCFSKLYWCCGC	37
MCCLCFSKLFRCC	26
MCRLCFSNLFCCC	41
MCVPCFSHTFRCC	33
MCFVCFRHSFLYC	39
MCVRWPARQSLFWLC	30
MCTRTSFYGFSYYAC	37
MCVRCFDQLFWRC	37
MCVPCFSHTFLC	25
MCCYKFRDLFWVC	40
MCTRKSFYGFWYYAC	32
MCRLSDFWVVC	25
MCWYCFRKSCWCC	37
MCCLCFSRLFWCC	43
MCMKCFRHRYWCC	47
MCFRCFSKLFWCC	38
MCCSCFSKLFWCC	34
MCRLCFRHSFLCC	36
MCRLCFSKLCWFC	33
MCRLCFSRLFCCC	36
MCRMCFSKLFWCCGC	32
MCCLKFRDLFWVC	50
MCRLCFSRLLWCC	42
MCYKWPIRSHLYWVC	30
MCIYRLSDFWVLCGC	25
MCRLRFCKLFWCC	35
MCCIKFRDLFWIC	24
MCRFRFSKLFWCC	40
MCYKCFTWLFLCC	43
MCRLCFIKLFWCCGC	24
MCFVYPRRQPLYWTC	24
MCYKCFTGRFLCC	41
MCCLCFGKLFWCC	32
MCTRTSFYGFWYYPC	33
MCTRTSFYGFWYYACGSGC	33
MCHICFSGLFYCC	42
MCRFCFSKLFFCC	39
MCNKCFTGLFLCC	41
MCRLCFSRLFWGC	24
MCCFKFRDLLWVC	53
MCYKWPIRSHLYWSC	24
MCRLRFSKLFWGC	24
MCVRCFDQLFRCC	30
MCIYRLSDFFVVC	24
MCWYCFRKSFWGC	23
MCVRCFDQLFCCC	42
MCYKCFTGLFLGC	23
MCTRTSFYGFWFYAC	37
MCMKCFRCRYWCC	23
MCCFKSRDLFWVC	32
MCHLCFSKLFRCC	32
MCFSCFSKRFWCC	39
MCRLCFNKPFWCC	38
MCCYRCWSLLWCC	38
MCPLWTRHFDRYWVC	23
MCRLCLRKLFWCC	30
MCRLCFCKLFWCCGC	48
MCRFCFSKLFRCC	23
MCLSCFSKQFWCC	37
MCYKCFTGLFLFC	39
MCFVYPRRRPLYWIC	29
MCFVCFSHTFICC	22
MCVPCFCHTFYCC	37
MCIYRLSDFSVVC	22
MCIYRLSDVWGVC	22
MCRLCFSKLFWYYAC	34
MCFSCFSKQLWCC	39
MCFPCFRFTFLCC	34
MCYLCFSKLFWCC	34
MCVPCFSHTILCC	22
MCWYCFRKSYWCC	33
MCVPCFSHTYLCC	22
MCIYRLSDLWVLC	22
MCYVCFSRSFICC	41
MCRLCFGKPFWCC	36
MCWVCYQHSFICC	44
MCCHRCWSLFWCC	30
MCRLCFDKLFWCC	40
MCRQCFSKLFWCC	37
MCRLCFNKLFCCC	40
MCIYGLSDFWVVC	22
MCCPCFLRTFLCC	30
MCIYRLSEFCVVC	21
MCRRCFSKLFWCC	21
MCVRRFDQLFWCC	21
MCCYRCWSLFCCC	27
MCDPCFSHTFLCC	35
MCRLCFSKLFLCCGC	39
MCYTWYKLRQRYWAC	30
MCFVYPRRQPSYWIC	21
MCTLTSFYGFWYYAC	34
MCYICFSGPFYCC	39
MCCTRFVNLFWIC	21
MCIVYPRRQPLYWIC	26
MCCFKFHDLFWVC	21
MCVRCFDQLLWCC	21
MCRLRFSKLFWRC	20
MCRLRFSKLFLCC	32
MCTRTSFYGFWYNAC	20
MCYKCFTGLILCC	27
MCIYRLSDGWVVC	20
MCIYRFSDFWVLC	20
MCYKCFIGLFLCC	30
MCTRTSFYGFRYYVC	26
MCIYRLSHFWVVC	20
MCSVYPRRQPLYWIC	20
MCRLCFCKLFCCC	36
MCFVYPRRQPLYWSC	28
MCYKWPIRLHLYWLC	20
MCRLCFCRLFWCC	26
MCRLRFSKLLWCC	58
MCYVCFERRFLCC	26
MCVRCSDQLFWCC	20
MCTRTSFSGFWYYAC	30
MCCFKFRDLFCVC	33
MCRLCFSKLWWCC	32
MCRLCFSKPFWRC	20
MCSNMWKLANRWCC	37
MCRLCFSKFCWCC	27
MCWYCFWKSFWCC	28
MCRSCFGKLFWCC	24
MCRLCLSKLFGCC	28
MCRLCFSKFFWCCGC	32
MCSKCFTGLFLCC	34
MCRLRFSKLFGCC	28
MCCYRCWSLSWCC	29
MCRLCFGKLFRCC	29
MCCYRCWTLFWCC	31
MCRLCFSGLFWCC	31
MCCSKFRDLFWVC	32
MCRLCFIKLFLCC	28
MCVYRLSDLWVVC	19
MCSNMWKLADRWWVC	19
MCLPCFHRTYICC	33
MCCYNLFSLFWVVC	19
MCCTRFVNLFWRC	19
MCRLCFCNLFWCC	19
MCIGKWYTYQYWTCC	27
MCRLCLSKLFWFC	27
MCRLCPSKLFWCC	27
MCRLRFSKLFCCC	31
MCRLCFSKLLWRC	27
MCVRCFLASFWCC	26
MCWYCFRHSFLCC	28
MCIYRLSEFWVLC	18
MCRLCFNKLFWRC	18
MCRLCFSKLFWCRGC	31
MCCYRCWSLFC	18
MCCYRCWSLFWC	18
MCLNMWKLANRWWVC	18
MCRFCFSKLFGCC	27
MCIYRLSDLWFVC	18
MCRLCFSMLFLCC	18
MCFSCFCRTFYCC	30
MCVPCFSHTFLFC	32
MCRLGFSKLFWGC	18
MCRLCFSKLFLGC	18
MCRWCFSKLFWGC	18
MCRWWFSKLFWCC	37
MCFRCFLASFWWC	18
MCSFLLRKLYWCCNC	25
MCVPCFSHAFLCC	24
MCFPCFSHTFLCC	25
MCVPCFSHTFLGC	18
MCCFKLRDLFWIC	18
MCCHRYRALFWIC	18
MCVPCFSHSFLCC	25
MCYKYFTGLFLCC	35
MCRLCFSNLFWCCGC	36
MCYACFEHRFLCC	22
MCIYRLSDLWGVC	17
MCFRWRLFHHFTPYC	17
MCRLCFSKLCCCC	34
MCVRTSFYGFWYYAC	24
MCRLCFSRLFWCCGC	30
MCCLCFSKLFWCCGC	17
MCWYCFRKSFWFC	31
MCVPCFSHTFWCC	26
MCFSCFCHTFYCCGC	28
MCCVRYLARFWCC	23
MCRLCSSKLFLCC	25
MCRLCLSKLFWRC	17
MCYKCFTGLFLYC	29
MCFVYPRRQPWYWIC	23
MCFVYPRRQLLYWIC	17
MCVPCFSHTCLCC	25
MCHLCFSKPFWCC	22
MCFRWQLFHHLTPYC	17
MCYRCFLASFWCC	22
MCVRCFDQLFWGC	17
MCVKCFRHRYWCC	28
MCIYRLWDFWVVC	17
MCYTCFSGLFYCC	32
MCRLRFSKLFRCC	22
MCAKFPWPFPIFWAC	17
MCRLCFCKLFLCC	28
MCYKCFNGLFLCC	29
MCRLCLGKLFWCC	24
MCFHCFASHFWCC	28
MCIYRLSDFWFVCGC	16
MCRLCFSKLFLRC	16
MCRLCLSKLCWCC	16
MCLLWTRHFDRYWAC	16
MCIYRLSDYWVVCGC	16
MCCFKLCSLFWAC	16
MCRLCFSKLCGCC	28
MCIYRLSYFWVVCGC	16
MCFRWRLFHHSTPYC	16
MCRLRFSNLFWCC	16
MCLPCFSHTFLCC	32
MCRMCLSKLFWCC	24
MCLLCFSKLFCCC	30
MCTRTSFYGFWYYGC	29
MCCYCFRKSFWCC	32
MCCFKFRDLYWLC	16
MCHLCFSKLFWCCGC	27
MCRLCFSKLFRRC	16
MCYRHPHSNPLFWLC	29
MCRKCFSKLFWCC	27
MCRRTSFYGFWYYAC	29
MCRLCFSRLSWCC	16
MCFVCFRHTFLCC	41
MCYRHPHSNPLYWLC	16
MCRVWFSKLFWCC	23
MCFHCFASRFLCC	29
MCVPCFFHTFLCC	22
MCFVYPRRQPLYRIC	16
MCRLCLSRLFWCC	23
MCTYRLSDLWVVC	16
MCYICFSGLFWCC	30
MCYKCCTGLFLCC	22
MCYKCFTGLVLCC	15
MCYICFSGLFYCCGC	15
MCWSLYRLFWCC	15
MCFPCFCHTFYCC	27
MCCYNLFSLFWIC	15
MCFRCFMASFWCC	26
MCYKWPIRSHSYWLC	15
MCRLCFGKLFWRC	15
MCWSCFRKSFWCC	25
MCRLCFSKLIWCCGC	15
MCDKCFTGLFLCC	15
MCIYRLSDFWGVCGC	15
MCIYRLSDCWVVCGC	15
MCFRCFAGLFWCC	15
MCRLCFSKLFVCC	30
MCIYRLTDLWVVC	15
MCRLWFSKLFWWC	15
MCYKWPIRSHLHWLC	15
MCFRCFACLFLCC	15
MCRLCFRRLFWCC	33
MCCYRCWSLFWYC	27
MCLLWTRHFDRYWCC	15
MCWYCFRESFWCC	27
MCFVYPRRQPLHWIC	15
MCYRWRLFHHLTPYC	22
MCVPCFSHTFLYC	27
MCCFKFRGLFWVC	24
MCCFKFRDLFRVC	22
MCIRWPTRQPLFWLC	15
MCSNMWRLANRWWVC	15
MCWCCFRKSFWCC	24
MCTRTSFYGFWYDAC	15
MCFVCFSHSFICC	25
MCRLCFSKFYWCC	21
MCFRWRLIHHLTPYC	15
MCRLCFSKLFCGC	15
MCRLCFSRLFWFC	26
MCIGRWYTYQYWTRC	15
MCSSCFCHTFYCC	24
MCYKWPIRSHLYRLC	15
MCRTRFVNLFWLC	14
MCFVYPRRQPVYWIC	14
MCFLCFASRFWCC	14
MCCSRCFKSFWCC	14
MCRLWFNKLFWCC	23
MCYKSFTGLFLCC	20
MCRLCFSNLFLCC	28
MCCYRCRSLFWCC	35
MCGYCFRKSFWCC	14
MCCYRCWSLFWFC	14
MCCYRCWSLFRCC	30
MCFVCFRHPFLCC	14
MCYVCFSGLFYCC	24
MCWYRCWSLFWCC	20
MCSRCFACLFWCC	14
MCCYRCCSLFWCC	21
MCFRWRLSHHLTPYC	14
MCCYRRWSLFWCC	27
MCRLCFSKLFLWC	14
MCWPCFARSFICC	21
MCWYCFRKSVWCC	26
MCLVCFRHSFLCC	27
MCWSLYGLFWAC	21
MCIYRPSDFWVVC	14
MCFRWRLFHHLTPLC	14
MCRLCFSKLSLCC	21
MCSSMWKLANRWWAC	14
MCCFKFRDLYWVC	14
MCDRCFDQLFWCC	20
MCRLCFSKLFRCCGC	21
MCRLWFSKLFWGC	14
MCFHCFSSRFWCC	21
MCTKFPWPLPIFWAC	14
MCSLCFSKLFWGC	14
MCVPCFSHTVLCC	14
MCRLCFSKLFWCFGC	14
MCIYRLSDFWYYAC	14
MCRSCLSKLFWCC	20
MCFVYPRRQSLYWIC	14
MCRLCFSKLFGWC	14
MCFRWRLFYHLTPYC	21
MCRLCSSKLSWCC	21
MCRLCFNKLFWGC	14
MCIYRLSDFWCVC	14
MCYKCVTGLFLCC	20
MCRLCFCKLLWCC	22
MCVRCFDQLFWC	14
MCFRCFLASFWRC	14
MCRFCFSKLFWGC	14
MCIYRLSDFWVVFGC	14
MCLPCFMHLFWCC	21
MCCFKFRDLFWVCGC	14
MCRLRFSKLCWCC	25
MCLPCFKHLFLCC	14
MCRSCFSKLFWCCGC	22
MCSNMWKLANRWWCC	14
MCRLWLSKLFWCC	22
MCCFKFRDLCWVC	14
MCFRCFLASFWYC	13
MCYSCFCHTFYCC	26
MCRMCFSKLLWCC	13
MCAYRLSDFWVVC	13
MCCFKFRDSFWVC	13
MCYKWPVRSHLYWLC	13
MCLNMWKLANRWWAC	13
MCIYRLSDFWVVVC	13
MCRLCLSKLFLCC	44
MCRLCFRKLFCCC	28
MCCYRCWSLFWWC	13
MCWLCFSKLFWCC	23
MCIYRLSYFWVLC	13
MCWFKFRDLFWVC	13
MCVPWFSHTFLCC	21
MCRLCFSRFFWCC	13
MCIYRLSEFLVVC	13
MCCYRCWSLFWCCGC	19
MCIYRFSDFCVVC	13
MCYKWPIRSHLFWVC	13
MCRLCFRKFFWCC	13
MCIYRLSDFRVVCGC	13
MCRLCFSKFFCCC	32
MCRLGFSKLFCCC	19
MCRLWFSKLFGCC	22
MCLPCFSKLFWCC	13
MCRLCFSKPFCCC	19
MCLYRLSDFLVVC	13
MCRLCCSKLFWGC	13
MCCYRCWSLFWRC	21
MCYICFSGFFYCC	13
MCRFCFSNLFWCC	13
MCIYRLSDVLVVC	13
MCYRFPSSRHLFWCC	24
MCHFCFSKLFWCC	13
MCVRCFDQLFWYC	18
MCQLCFSKLFWCC	13
MCWYCFRKSFWSC	13
MCRLCFSKHFWCCGC	13
MCRLCFYKLFWCC	13
MCFRCFSHTFLCC	13
MCCYRCWSSFWCC	20
MCRLCFSRLFYCC	19
MCRLCFRKLLWCC	19
MCCYNLFSLLWAC	12
MCFACFRHSFWCC	12
MCFRCFACPFWCC	12
MCFHCSASRFWCC	12
MCFRCFLASFLCC	12
MCCLCFSKLFWRC	20
MCRLCSSRLFWCC	18
MCYKCFTGQFLCC	20
MCLLCFSKLFWFC	19
MCYKWPIRSHLYWFC	24
MCWYWFRKSFWCC	20
MCCLCLSKLFWCC	18
MCTPTSFYGFWYYAC	12
MCRLCFSKLFCRC	17
MCRLWFSRLFWCC	21
MCCLRCFLSFLCC	12
MCSHCFASRFWCC	12
MCCYRCWSLYWCC	20
MCLFCFSKLFWCC	18
MCRLCSSKLFWCCGC	18
MCTRTSFYGFWYSAC	12
MCRWCFSKLFLCC	20
MCIYRWSDLWVVC	12
MCRLCFNELFWCC	12
MCIFRLSDLWVVC	12
MCISCFCHTFYCC	24
MCVPCFSNTFLCC	12
MCTRTRFYGFWDYAC	12
MCFVYLRRQPLYWIC	12
MCIYRLSEFWVGC	12
MCRLWFSKLIWCC	12
MCRLCFSKFLWCC	27
MCSLCFCKLFWCC	21
MCYKCFTVLFLCC	19
MCCFKFCDLFWVC	18
MCWYCFRKSFC	12
MCTGTSFYGFWYYAC	12
MCCYRCWSLYWLC	12
MCIRWRLFHHLTPYC	12
MCHKWPIRSHLYWLC	12
MCRLCFRKLFWFC	18
MCYRWPIRSHLYWLC	12
MCCYRCWSLFWVC	12
MCRLCFSKLYCCC	30
MCCLCFCKLFWCC	12
MCRLRFRKLFWCC	27
MCRLCFSKLLWWC	12
MCRSCFSKLFRCC	22
MCRLCFSKLFWCCRC	19
MCVPCFSHLFLCC	18
MCRLCFRKLFLCC	36
MCLYRLSDFWVLC	12
MCRWCCSKLFWCC	24
MCTRTSFYRFWYYAC	12
MCSLCFSKLLWCC	12
MCIYRLSEFWGVC	12
MCLRCFLASFWCC	19
MCFRWRLFNHLTPYC	12
MCSLRFSKLFWCC	20
MCRLCFGKLFWCCGC	12
MCIYRLSDFWAVCGC	12
MCCICFSGLFYCC	11
MCRLRFNKLFWCC	21
MCTRWPARQPLFWLC	11
MCIRTSFYGFWYYAC	18
MCCMCFSKLFWCC	16
MCTRRSFYGFWYYAC	11
MCSQSWVLYKLWRVC	11
MCIYRLSDFWVVCDC	11
MCCLRFSKLFWCC	18
MCLPRFSHLFLCC	11
MCIYRLTEFWVVC	11
MCFSRFSKQFWCC	17
MCRLWFSNLFWCC	21
MCRMCFSKLYWCC	17
MCSNMWKLANRWRVC	19
MCFRCFLSSFWCC	11
MCCYRCWSVFWCC	21
MCRLCFNKLFWCCGC	18
MCRLCFSKLFICC	11
MCYICFEHRFLCC	11
MCRLCLSKLYWCC	19
MCSYMWKLANRWWAC	11
MCWYCFRKSFWLC	29
MCIYRWSDVWVVC	11
MCFSCLSKQFWCC	11
MCIYRLSDLFVVC	11
MCCLCFSKLFCCC	11
MCRLCLSKLFWWC	11
MCRLCFSKHLWCC	11
MCYKGFTGLFLCC	18
MCIYRLSDFWDVCGC	11
MCRLCFNKLFWYC	11
MCRLCVSKLFWCCGC	17
MCFSCFSKQFCCC	17
MCIYRLSDWWVVC	11
MCRLCLCKLFWCC	20
MCYVCFGHRFLCC	17
MCRSCFSKPFWCC	11
MCRVCFSKLLWCC	11
MCMKCFSKLFWCC	11
MCCFKFRDLFWGC	18
MCHSCFSKLFWCC	22
MCFVYPRRQPLCWIC	11
MCCYRCWSLVWCC	16
MCVRCLDQLFWCC	11
MCRLWTRHFDRYWVC	11
MCRLCFSRLFWWC	11
MCRLCFSKLFCWC	11
MCWYCCWSLFWCC	18
MCIRWPARQPLFWPC	11
MCFSCFSKQFWC	11
MCRLCFSKLFWKC	11
MCCFKFRNLFWIC	11
MCRSCFSKLFWRC	20
MCCFKFRVLFWVC	11
MCFRCFLAPFWCC	11
MCVRCFDQLFWWC	11
MCCKWPIRSHLYWLC	11
MCRLCFRKLYWCC	11
MCCFKFRDLSWVC	21
MCYHCFASRFWCC	18
MCRTCFSKLFWCC	11
MCRLCLSKLFCCC	33
MCVLCFSHTFLCC	11
MCVRWFDQLFWCC	11
MCLPCFMRLFLCC	11
MCRLCFNKLFWVC	11
MCRFCFSKLFWCCGC	11
MCYTCFTGLFLCC	11
MCRLCFSKLHWCC	18
MCIGKWYTYQYWARC	11
MCRLCFSKLLLCC	18
MCRYNLFSLFWAC	18
MCRLWVSKLFWCC	11
MCFRYPTRCPLFLLC	11
MCRSRFSKLFWCC	19
MCRLCHSKLFWCC	19
MCFRWWLFHHLTPYC	11
MCLLWTRHFDRYWLC	11
MCRLCFSKLFCC	17
MCVPCFTHTFLCC	11
MCWNCFRKSFWCC	11
MCRLCFSKLFWCYGC	11
MCYVCFSHSFIYC	19
MCCYNLFSLFLAC	18
MCCYRCWSMFWCC	10
MCCTRLVNLFWLC	10
MCVRCFDQLSWCC	10
MCRLCFSKFFWWC	10
MCCFQFRDLFWVC	10
MCFSCFCHTFYYC	10
MCLYCFRKSFWCC	17
MCHLCFSKLFCCC	19
MCCFKFRDWFWVC	10
MCRFCLSKLFWCC	17
MCRLRFGKLFWCC	10
MCTRTSFYGFWYHVC	10
MCFVYPRHQPLYWIC	16
MCKYHRVFYLAPLSC	20
MCCLCFSKPFWCC	18
MCFRCFLASFWCCGC	10
MCFRCFLASFWGC	10
MCYSCFSKQFWCC	17
MCIRWPARHPLFWLC	10
MCLLCFSKLFLCC	16
MCRSCFSKLLWCC	26
MCRLCFGKLLWCC	17
MCCYRCWSLYWIC	10
MCRLCFGKLFWC	10
MCVHCFSHTFLCC	16
MCLYRLSEFWVVC	10
MCYVYPRRQPLYWIC	19
MCSNMWRLANRWWAC	10
MCNYRLSDFWVLC	10
MCFTCFSKQFWCC	10
MCYKWPIRPHLYWLC	10
MCFSCFSHTFYCC	10
MCRVCFSRLFWCC	10
MCGPCFSHTFLCC	10
MCRLCFSKSFWCC	24
MCFVCFRASFWCC	18
MCRLCFSKLFGCCGC	10
MCRLCFCKLYWCC	10
MCRLCFRKLFWCCGC	10
MCRLCSSKLLWCC	10
MCRFCFCKLFWCC	10
MCCLCFSNLFWCC	18
MCRFCFSKFFWCC	10
MCRWCVSKLFWCC	10
MCRLCFSKLFWCCVC	17
MCRLCFSNLFWGC	17
MCRMCFSKLFWSC	10
MCIYRLSDLWVGC	17
MCRLGVSKLFWCC	10
MCRLCFSNFFWCC	16
MCHLCFSKLFWFC	10
MCIYRVSDCWVVC	10
MCRLWFSKLLWCC	27
MCIYRLSDFWLVCGC	10
MCYKCYTGLFLCC	16
MCCFKFRDFFWVC	10
MCVRCFVQLFWCC	10
MCCLCFSKFFWCC	10
MCRLCFSKLFWWCGC	10
MCRLCCSKLCWCC	10
MCRLCFSMLFCCC	19
MCIYRLSDYRVVC	10
MCIYCLSDFCVVC	10
MCFVRFRHSFLCC	10
MCRLRSSKLFWCC	16
MCCFKFHDLFWIC	10
MCIYRLSYFLVVC	10
MCRLCFSNLFWFC	18
MCWYCFRKSFWVVC	10
MCRLRFSELFWCC	10
MCIRWPARQPLFWRC	10
MCCYCCWSLFWCC	16
MCTRTIFYGFWYYAC	18
MCVYRLSDFWVMC	10
MCSRCFLASFWCC	17
MCFHCFASRSWCC	10
MCRLCFRKLCWGC	10
MCFPCFSKQFWCC	16
MCYACFSHSFICC	18
MCFSCFCHTFFCC	10
MCGYRCWSLFWCC	9
MCYVCFRHSFWCC	9
MCCLCCSKLFWCC	9
MCVPCFSQTFLCC	15
MCFRWRPFHHLTPYC	9
MCCYHCWSLFWCC	17
MCFSCFCYTFYCC	9
MCRLCFSKLFWCCAC	18
MCFRWRLFLHLTPYC	9
MCVYRLSDFWVVCGC	9
MCFWWRLFHHLTPYC	9
MCRLCFCKFFWCC	9
MCIGKWYTYQYWTLC	14
MCFYRLSDLWVVC	9
MCFRRFLASFWCC	9
MCYICFSGLFHCC	16
MCFVCFRHSLLCC	14
MCFSCFGHTFYCC	9
MCYKCFTGMFLCC	9
MCWYCCRKSFWCC	14
MCRLCLRKLFWGC	9
MCRLCFSKLFFFC	15
MCYKWPIWSHLYWLC	9
MCCYRCWSLCWCC	16
MCRFCFNKLFWCC	9
MCFSCFPKQFWCC	9
MCTRTSFYGFWSYAC	9
MCRLCFSKLLCCC	18
MCFHCFASRFWRC	9
MCLLCFSNLFWCC	9
MCRLCFSKLFFWCC	9
MCHLCFSKLFWRC	17
MCRLSFCKLFWCC	9
MCSNMWKLANRWWGC	9
MCRLCFSKPFRCC	15
MCRLCFSWLFWCC	9
MCVRCFDQLFYCC	9
MCCLKFRDLFWIC	9
MCRFCFSKLFWFC	17
MCWFCFRKSFWCC	16
MCRLCFGKLFWGC	9
MCFSCFSKQFRCC	9
MCFSCFCHTFYWC	9
MCFHCFLASFWCC	9
MCSVCFRHSFLCC	15
MCRLCFSKLFWHC	9
MCFHCFSHTFLCC	9
MCCLCSSKLFWCC	9
MCLLWTRHLDRYWVC	9
MCSNMWKPANRWWVC	9
MCSNMWKLASRWWVC	9
MCRLCFSRLFWYC	9
MCRLCFSKFSWCC	15
MCFHCFASCFWCC	9
MCYKWPIQSHLYWLC	9
MCVYRLSDFLVVC	9
MCFSCLCHTFYCC	17
MCVRCFSKLFWCC	9
MCCTRFVNPFWLC	9
MCFRWRLFHHLAPYC	9
MCRLCFSKPFLCC	15
MCRLRFSKPFWCC	9
MCYLCFSGLFYCC	9
MCGRCFDQLFWCC	9
MCCFRCWSLFWCC	14
MCSNMWKLANRWC	9
MCCTRFVNLFWPC	9
MCCFCFSKLFWCC	9
MCRLGFCKLFWCC	9
MCFVCFSHAFICC	9
MCRWCFSKLFWCCGC	9
MCIYRLSDFWVVCVC	9
MCYKWPIRSHWYWLC	9
MCMYRLSEFWVVC	9
MCVYRLSDFWAVC	9
MCRLCLSKPFWCC	14
MCLTCFRRLFYCC	15
MCRLGFSKLFWFC	9
MCCYRCWALFWCC	14
MCRLCCSRLFWCC	9
MCCFKFRDVFWVC	9
MCRLCFSRLFWC	9
MCFSCFCHTSYCC	9
MCMKCFRYRFWCC	9
MCCYRCWSWFWCC	9
MCSNMWKLADRWWAC	9
MCRLCVRKLFWCC	9
MCYKCFTGLFLSC	9
MCFPCFSHLFLCC	9
MCYVCFSHSFICCGC	15
MCFIYPRRQPLYWIC	9
MCIYRLSDCWGVC	9
MCCYRCWSLIWCC	9
MCHLRFSKLFWCC	9
MCIYRLPDLWVVC	9
MCYICFSGLFYRC	9
MCLLCFIKLFWCC	9
MCFSCFSKQIWCC	9
MCRLCFSSLFWCC	9
MCRLCFGKLFCCC	16
MCSDMWKLANRWWVC	9
MCTRTSFYGFWVVC	9
MCCVKFRDLFWVC	9
MCRLWFSKLFWFC	9
MCCLCFSKLLWCC	15
MCRLCFSKLLWFC	9
MCRLCFCKLFWGC	9
MCRLCFNKLLWCC	16
MCCLCFRKLFWCC	22
MCRLCLNKLFWCC	13
MCRSCFSKLFWGC	8
MCRWCFSKLFRCC	14
MCIYRLSYLWVVC	8
MCRLCFSKPFWGC	8
MCRMRFSKLFWCC	8
MCIYCLSDFWVLC	8
MCMKCFGYRYWCC	8
MCRLCFSKLLRCC	14
MCSLCFSNLFWCC	8
MCIYRLSDFCVVCGC	8
MCRLCFSKRFWCCGC	8
MCFRCFSCLFWCC	8
MCYICFSGLFFCC	8
MCFHCFACRFWCC	8
MCFSCFCHTFYC	8
MCFRWRLFHLLTPYC	8
MCFRCFLASFWLC	14
MCVRCFDQLCWCC	8
MCRMCFSRLFWCC	14
MCWYCFRKRFLCC	8
MCYICSSGLFYCC	8
MCRLCFNKLYWCC	8
MCIYRLSDLWVVCGC	16
MCRSCFRKLFWCC	15
MCRFCFRKLFWCC	8
MCRVCFSKLFWCCGC	8
MCRLCLSKLSWCC	15
MCRYCFSKLFCCC	15
MCFHCFASRFWC	8
MCRLCYSKLFWCCGC	8
MCWYYFRKSFWCC	14
MCFYCFASRFWCC	8
MCFRWPARQPLFWLC	8
MCVRCFDQLFWFC	13
MCRLCCSKLFWCCGC	14
MCRLCCNKLFWCC	8
MCIYRLSDLWLVC	8
MCSNMWKLANRRWVC	8
MCWYCVRKSFWCC	8
MCIRCFLASFWCC	8
MCFSCFCHTLYCC	15
MCFRRFACLFWCC	8
MCRLCRSKLFWCC	14
MCRSCFSKLFCCC	14
MCFSCFSKQFYCC	8
MCRLCFNKLFWFC	15
MCRLWFSKLCWCC	8
MCLYRLSDLLVVC	8
MCRLCLSNLFWCC	8
MCRSCFSELFWCC	8
MCRLCFCKLFRCC	8
MCRLCFSKLFWRCGC	8
MCRLWSSKLFWCC	8
MCRLCFSKLYWRC	8
MCRLCLSKLFWSC	8
MCIYRLSVFCVVC	8
MCIRWPARQPPFWLC	8
MCRLCFSELSWCC	8
MCRLCLIKLFWCC	13
MCIRRPARQPLFWLC	8
MCRLCLSKLIWCC	8
MCYRCFACLFWCC	8
MCIYRRSDFWVVC	8
MCSMCFSKLFWCC	8
MCRLCVSKLFWGC	8
MCIYRLSDFLVGC	8
MCLVCFRRLFYCC	8
MCRLCLSKFFWCC	14
MCIYRLTDFWVLC	8
MCRLGCSKLFWCC	8
MCFHCFASRYWCC	8
MCFSCFSKQFWRC	8
MCRLCFSKFFRCC	8
MCFSCFSKQCWCC	8
MCRLCSGKLFWCC	8
MCRLCFSKFFWFC	15
MCHLCFSKLFWGC	8
MCSLSFSKLFWCC	8
MCIYRLSDLWAVC	8
MCRVCFSKLFLCC	8
MCYICLSGLFYCC	8
MCCLCFSKLSWCC	8
MCSSCFSKQFWCC	8
MCWPCFARLFLCC	8
MCTRTSFYGFWYYACGC	15
MCHKCFSKLFWCC	8
MCFVYPRRQPLDWIC	8
MCRLCFCKLFWRC	8
MCHLCFSKLYWCC	8
MCHVCFSHSFICC	16
MCCYNLLSLFWAC	8
MCTNMWKLANRWWVC	8
MCFSCFSKQYWCC	8
MCIGKWYTYQHWTRC	8
MCIYRLSDFWVVYGC	8
MCHLCFRKLFWCC	8
MCRLCFNKLFWWC	8
MCRLWFRKLFWCC	8
MCFVCFRHSSLCC	8
MCLHCFASRFWCC	8
MCCYRCWSLFWGC	8
MCHLCFSKLLWCC	15
MCAFWCFHYIPDC	8
MCTRTSFYGFWYHDC	8
MCVRCFDQLYWCC	8
MCSFKFRDLFWVC	8
MCIYCLSDFLVVC	8
MCWYCFCHTFYCC	8
MCFHCFASRFRCC	8
MCRLCFSELFLCC	8
MCRRCFSALFLCC	8
MCSNTWKLANRWWVC	8
MCPHPTLYLSMFWLC	8
MCIRWPARRPLFWLC	8
MCRLCFCKLFWFC	8
MCCFKFRDMFWIC	8
MCYVRFSHSFICC	13
MCLPCFSHLFPCC	8
MCIRWPARQPLFRLC	8
MCSRWRLFHHLTPYC	8
MCYICFSGLFYFC	8
MCSNIWKLANRWWAC	8
MCFRCFACLFWRC	8
MCYRHPRSNPLFWAC	8
MCLYRLTDFWVVC	8
MCMRWPNLNALFWLC	8
MCYIRFSGLFYCC	8
MCWYCFRQSFWCC	8
MCRPYPRFQSLFLLC	8
MCIYRFSDFLVVC	8
MCFRWRLYHHLTPYC	8
MCFKWPIRSHLYWLC	8
MCIRWPARQSLFWRC	8
MCCFKFRDLFLIC	8
MCIRWPVRQPLFWLC	8
MCCFKSRDLFWIC	7
MCFVYPCRQPLYWIC	7
MCIGKWYTYQYWTYC	7
MCFVCFRHSFICC	7
MCCFKLCSLFWIC	7
MCRLWFSKLFLCC	7
MCKYHRVFYLAPLNC	7
MCFVCFRHSFLRC	7
MCRLCFNKLSWCC	14
MCWYCFASRFWCC	7
MCIYRLSDFGVVCGC	7
MCSNMRKLANRWWAC	14
MCVPCFAHTFLCC	13
MCLRWRLFHHLTPFC	7
MCFVYPRRQPFYWIC	7
MCRLCFSKFFLCC	7
MCRLSCSKLFWCC	13
MCVYRLSDFCVVC	7
MCSLCFSKLFCCC	14
MCRLCFSKLFWCCCC	7
MCVGKWYTYQYWTRC	7
MCRLCFSKLVWCCGC	7
MCPFWMYHYIPSC	7
MCCLCFSELFWCC	7
MCIRCFACLFWCC	7
MCCVCFSHSFICC	7
MCFSRFCHTFYCC	7
MCLPCFSHLFLCCGC	13
MCYKWPIRSQLYWLC	7
MCLPCFSHSFLCC	7
MCVPCYSHTFLCC	7
MCFRCFLASFCCC	13
MCYFCFSGLFYCC	7
MCWYCFRKSFGCC	7
MCRLCSSKLFWRC	7
MCLICFRRPFYCC	7
MCRLCFGELFWCC	12
MCRLCSSKLFCCC	7
MCFHCFASRLWCC	7
MCVPCFSHKFLCC	7
MCFRCFACLLWCC	7
MCYICFSGLFCCC	7
MCFVHPRRQPLYWIC	13
MCYICFSGLLYCC	7
MCTYRLSDFWAVC	7
MCHLCFSKLSWCC	7
MCIHCFASRFWCC	7
MCYVCFSHPFICC	7
MCIYRLSDFWALC	7
MCCYRCWSLFWLC	25
MCCLCFSKLFWFC	12
MCRLRFSKLSWCC	14
MCRMCYSKLFWCC	7
MCCYRCWSLFWAC	13
MCCYNLFSLFCAC	13
MCLVCFSKLFWCC	7
MCRLCFSKLFWCCDC	7
MCRLCFIKLFCCC	14
MCYKCFPGLFLCC	7
MCHLCFSKLFWYC	7
MCCYRCLSLFWCC	7
MCRVCFCKLFWCC	7
MCRLCFNKLFWC	7
MCFYRLSDFWVMC	7
MCFSCFCHSFYCC	7
MCRLCFGKLFWWC	7
MCTRTNFYGFRYYAC	7
MCIFRLSDFCVVC	7
MCSNMWKLSNRWWVC	7
MCARTSFYGFRYYAC	7
MCARTSFYGFWYYVC	7
MCFRWRLFHHLTLYC	7
MCVRCFACLFWCC	13
MCFSCFCHTFYFC	14
MCFYRLSDFWVLC	7
MCFHCFASRFCCC	7
MCCLCFIKLFWCC	7
MCRLRFSKLIWCC	7
MCHLCLSKLFWCC	13
MCRLCFSKLSWGC	7
MCIYRLSDFCAVC	7
MCTRTSFYGFWYYEC	7
MCYICFSDLFYCC	7
MCRSCFSKLFWYC	7
MCIYRLSDFCFVC	7
MCIYCLSEFWVVC	7
MCRLCFSKLFMCC	12
MCRLCFSKLSWWC	7
MCRLCLSKLFWYC	7
MCRFCFSRLFWCC	7
MCCLCFSKLFWWC	7
MCRLCFGKLFWFC	13
MCRLCFRKLFWWC	7
MCARTSFYGFWYYDC	7
MCYRYPHSNPLFWAC	7
MCSNMWKLANRRWAC	7
MCCYNLFSLFWLC	7
MCRLCFSRLFC	7
MCVRCFDQFFWCC	7
MCRLCFSKPFWFC	7
MCIYRLSDILVVC	7
MCCTRFVDLFWLC	7
MCLYRLSDFCVVC	7
MCVPCFYHTFLCC	12
MCCFEFRDLFWVC	7
MCCFKIRDLFWVC	7
MCIRWPARLSLFWLC	7
MCIYRLSDVCVVC	7
MCFSCFSKQSWCC	7
MCRSCFSKLYWCC	7
MCLPCFSHLLLCC	13
MCRFCFSKPFWCC	7
MCRSSFSKLFWCC	7
MCIYRLSDSWVVCGC	7
MCRMCFSKLCWCC	7
MCLLCFCKLFWCC	7
MCRLCFSKLCWCCGC	7
MCMKCFRYQYWCC	7
MCRLCFSELFWFC	7
MCIYRLSELLVVC	7
MCRLCFCKPFWCC	7
MCIYRLSDFLAVC	7
MCLFCFSKLFLCC	7
MCFVCFGHSFLCC	7
MCRLWYSKLFWCC	7
MCIYRLLDFWVVCGC	7
MCRLCFIKLFWRC	7
MCTRTCFYGFRYYAC	7
MCLPCSSHLFLCC	7
MCRLRVSKLFWCC	7
MCFSCFCHTFLCC	7
MCFSCFSKQFWGC	7
MCRFRFSKLFGCC	7
MCIYRLSDHWVVC	7
MCRYCFSKLFLCC	13
MCFRCFLASSWCC	7
MCFPCFSKLFWCC	7
MCRLCYSKLFRCC	7
MCIYRLSDLRVVC	7
MCFVYPRRHPLYWIC	7
MCRWCFGKLFWCC	7
MCIYRFSDLWVVC	7
MCRLCFSQLFCCC	7
MCSLCFRKLFWCC	7
MCTRTRFYGLWYYAC	7
MCRLCVSKRFWCC	7
MCRLCFSKLFRGC	7
MCSLCLSKLFWCC	14
MCRLCFSKLSWCCGC	7
MCRLGFSKLFWCCGC	7
MCYVCSSHSFICC	7
MCMYRLSDCWVVC	7
MCTRTSIYGFRYYAC	7
MCRLCFIKLYWCC	7
MCRWCFSKLLWCC	7
MCIYRLSDVWFVC	7
MCLYRLSDLCVVC	7
MCRLCFSKLFLYC	13
MCYQCFTGLFLCC	7
MCRSWFSKLFWCC	7
MCCLCVSKLFWCC	7
MCFYRLSDFLVVC	7
MCRLCLSKLCWGC	7
MCRLCFRKLFGCC	7
MCRMCCSKLFWCC	7
MCYVCFSHSFIRC	7
MCFSCFCHPFYCC	7
MCRLGFSKLYWCC	7
MCIFRLSEFWVVC	7
MCRLCFIKPFWCC	7
MCVPCCSHTFLCC	7
MCRLCFSKLLGCC	7
MCHLCFSKLFFCC	7
MCRLCFWKLFWCC	7
MCFKCFSKLFWCC	7
MCIYRVSDVWVVC	7
MCCSKFRDLFWIC	6
MCRLCCSKLFWFC	6
MCFVYPRCQPLYWIC	6
MCFSWRLFHHLTPYC	6
MCFRWRLLHHLTPFC	6
MCFRCFLDSFWCC	6
MCRLWFSKLVWCC	12
MCRMCFSKLFLCC	6
MCCYNLFSLYWLC	6
MCRLCSSKPFWCC	6
MCRLCLSKLLWGC	6
MCIGKWYTHQYWTRC	6
MCFYRLSDVWVVC	6
MCLPCLSHLFLCC	6
MCRMCFSKLFRCC	6
MCIYRLTDFRVVC	6
MCRLCSNKLFWCC	6
MCCTPCYGLLHCC	6
MCTRASFYGFRYYAC	6
MCRLCFSHLFLCC	6
MCCYRCWSLFYCC	12
MCRLRYSKLFWCC	6
MCRLCFCKLFWYC	6
MCRLWFSKPFWCC	6
MCIYRLSDFLVVCGC	6
MCWYCFRNSFWCC	6
MCSQSWVLHELWRVC	6
MCRLCFNKHFWCC	6
MCCYRCWSFLCC	6
MCRLCFRKLFWRC	6
MCCCRCWSLFWCC	12
MCYRHPHGNPLFWAC	6
MCYKWPIRSRLYWLC	6
MCRMGFSKLFWCC	6
MCRLCCRKLFWCC	6
MCRLCFSKLCRCC	6
MCRMCSSKLFWCC	6
MCRLCFSNLLWCC	18
MCSNMWKLTNRWWVC	6
MCYICFSHTFLCC	6
MCYKWPIRSHLCWLC	6
MCSNVWKLANRWWVC	6
MCLRCFACLFWCC	6
MCFRWRLFQHLTPYC	6
MCRQSWVLYELWRVC	6
MCYRFPSSRHLFWVC	6
MCYKWPIRTHLYWLC	6
MCRFCFSKLFWRC	6
MCRLCYIKLFWCC	6
MCCTRFVNLFCLC	6
MCHLCFSKLFWC	6
MCTRTCFYGFCYYAC	6
MCSLCFSKLCWCC	6
MCRLCVSKLFWFC	6
MCFSCFCHIFYCC	6
MCRLCFSKPFWCCGC	12
MCRLCFSKPLWCC	6
MCVRCFASRFWCC	6
MCFSCFCHTFCCC	6
MCHLCFCKLFWCC	6
MCRLCFACLFWCC	6
MCYICFPGLFYCC	6
MCCTRFVSLFWLC	6
MCYKWPIRSHLYWAC	6
MCIYRLSDCGVVC	6
MCRWCFRKLFWCC	6
MCHLCFSELFWCC	6
MCRMCVSKLFWCC	6
MCYKWPIRSHVYWLC	6
MCRLCFSMLFWFC	6
MCFFYPRRQPLYWIC	6
MCIYRLSDFCVGC	6
MCIYRLSDFWVDC	6
MCFRWLLFHHLTPYC	6
MCRFSFSKLFWCC	6
MCFRWRLFHRLTPYC	6
MCTRTCYYGFWYYAC	6
MCRLCFSDLFWCC	6
MCRMCFSKLSWCC	6
MCRLCLSMLFWCC	6
MCWHCFRKSFLCC	11
MCCTRFVNLFLLC	11
MCRFCFSKLFWWC	6
MCRLCFINLFWCC	6
MCRLCVSKLFCCC	6
MCLPCFSHLFLC	6
MCYKWPIRSLLYWLC	6
MCRLCGSKLFWCC	6
MCRLCFGKLFYCC	6
MCSNMWKLANRWWTC	6
MCVRCWSLFWCC	6
MCCYNLFPLFWAC	6
MCRLCFSHSFICC	6
MCTRTSFYGFRYYDC	6
MCFSCFCHTFYGC	6
MCCYKFRDLFWIC	6
MCVPCFSLTFLCC	6
MCWDCFRKSFWCC	6
MCRLCFRQLFWCC	6
MCCFNFRDLFWVC	6
MCIYRLTDFCVVC	6
MCRVCVSKLFWCC	6
MCYKCFSRLFWCC	6
MCFQCFASRFWCC	6
MCIYRSSDVWVVC	6
MCIYRLSDICVVC	6
MCFRWPARQSLFWLC	6
MCFLYPRRQPLYWIC	6
MCLLCFSRLFWCC	6
MCICCMSFAWTFC	6
MCRLCVSKLFLCC	6
MCIGKWYTYQYWLC	6
MCRLCFSRLFWSC	6
MCIRCFCSLYFCC	6
MCRLCFSKLFGFC	6
MCSRSWVLYELWRVC	6
MCVYRLSEFWVVC	6
MCSYRCWSLFWCC	6
MCVPYFSHTFLCC	6
MCRMWFSKLFWCC	6
MCFRCFACRFWCC	6
MCSNMWKLANRWWDC	6
MCYKWPIRSPLYWIC	6
MCCFKFRDLFC	6
MCIYRVSDFWGVC	6
MCIYRLSDFWFGC	6
MCFRCFLTSFWCC	6
MCSNMWELANRWWAC	6
MCTRTSFHGFRYYAC	6
MCCLCFSKLFWGC	6
MCLSCFSHLFLCC	6
MCIYRWSDFWVVCGC	6
MCRLCFSKLRWCC	6
MCSDMWKLANRWWAC	6
MCRLCFSKLYRCC	6
MCIRWPARQTLFWLC	6
MCYKWPIRWHLYWLC	6
MCRLCFNKLIWCC	6
MCRSCFCKLFWCC	6
MCYRHPHSNPLFC	6
MCRLCFSKPFWC	6
MCRLCFCNLFCCC	6
MCRLCYSKLFWRC	6
MCCLWFSKLFWCC	6
MCIYRLSDRWVVC	6
MCRLCFSKIFWGC	6
MCYVCLEHRFLCC	6
MCRSCFSKLFWWC	6
MCWYCFRKSIWCC	12
MCRLGFSKLFLCC	6
MCRLCFSKLFCCCGC	6
MCDYRLSDFWVVC	6
MCWYCFRKSFYGFWYYAC	6
MCSLCFNKLFWCC	6
MCRLWFSKLYWCC	6
MCFRRRLFHHLTPYC	6
MCRMCFIKLFWCC	6
MCTRTSFYGFWYWVC	6
MCIVCFRHSFLCC	6
MCRLCFRKLWWCC	6
MCCFKFRDLVWVC	6
MCIYRLSDFWVVRGC	6
MCIRWPARQSLYWIC	6
MCSNMLKLANRWWAC	6
MCLPCFMHLFLCCGC	6
MCRLCVSKLLWCC	6
MCMRTSFYGFRYYAC	6
MCRLCFSKLCWWC	6
MCYIWFSGLFYCC	6
MCRLCFRELFWCC	6
MCFVYPHRQPLYWIC	6
MCSFCFSKLFWCC	6
MCWHCFRRSFWCC	6
MCVPCFSHTFLSC	6
MCIYRLSDPWVVC	6
MCIYRLSDLCVLC	6
MCRMCISKLFWCC	6
MCRLCFGKLSWCC	6
MCIYRSSDSWVVC	6
MCFVYPRRQPLYWNC	6
MCTKFPRPFPIFWAC	6
MCRLCFSQLFWFC	6
MCRLCISKLFWFC	6
MCRLCISKLFWRC	6
MCFSCFSEQFWCC	6
MCSWCFSKLFWCC	6
MCYKCFTALFLCC	6
MCNYRLSDFWVVCGC	6
MCRLCFSKLYLCC	6
MCVYRLSDFWVLC	6
MCRLCFSKLLWSC	6
MCLPCFSHLSLCC	12
MCRQRFSKLFWCC	6
MCSYRLSDLWVVC	6
MCFHCFASLFWCC	6
MCRLCFSMLFWRC	6
MCIYRLSDYWDVC	6
MCSSMWKLANRWWVC	6
MCRLCFSNLFWWC	6
MCFSWFCHTFYCC	6
MCIYRLSDFWFLCGC	6
MCRLCFIKLFWFC	6
MCTRTSLYGFWDYAC	6
MCIRWPSRQPLFWLC	6
MCRTPCYGLFHCC	6
MCVLCFDQLFWCC	6
MCFVYPLRQPLYWIC	6
MCYVCFSHSFIC	6
MCSLCFSKLFWCCGC	6
MCFRCFLAAFWCC	6
MCRLSFSKLFWCCGC	6
MCIRWPARQPLFLLC	6
MCRLCFNKLFWLC	6
MCIYRLSDLWVMC	6
MCRLCVSKLYWCC	6
MCCYRCWLLFWCC	5
MCVRCFNRLFWCC	5
MCRLCFSNLCWCC	5
MCYKWPIRSHLDWLC	5
MCIYRSSDLWVVC	5
MCRLCFSKLFWDC	5
MCCYRCWSFFWCC	10
MCFRFPTRCPLFWCC	5
MCTKFPLPFPIFWAC	5
MCSLWFSKLFWCC	5
MCWYCFRKSFFCC	5
MCTKFPWPSPIFWAC	5
MCRLCFSKLIWSC	5
MCRMCFSKHFWCC	5
MCIYRQSDFWVVC	5
MCSLCFSKLFLCC	5
MCVYRLPDFWVVC	5
MCYICFSGLYYCC	5
MCFRCFTCLFWCC	5
MCFVCFRHLFWCC	5
MCIRWPARQPQFWLC	5
MCCLCFSKLFYCC	5
MCCFKIRDLFWIC	5
MCMKCFRNRYWCC	5
MCYVCFEHRILCC	5
MCWLCFRKSFWCC	10
MCIYRLSDFLFVC	5
MCWPCFARPFLCC	5
MCCYRCWSLFWVVC	5
MCTYRLSDFCVVC	5
MCRVCFRKLFWCC	5
MCRLCFGKHFWCC	5
MCFHCFASRFC	5
MCTRWPARQSLFWLC	5
MCVRCFDQLFWVVC	5
MCLLWTRHFDRYWGC	5
MCWYCFRKIFWCC	5
MCVHCFASRFWCC	5
MCCYNLFSLYWIC	10
MCFRCFACLYWCC	5
MCRLCSCKLFWCC	5
MCYKCITGLFLCC	5
MCMICFRRLFYCC	5
MCFVYSRRQPLYWIC	5
MCCFKLCSLFWLC	5
MCWHCLRKSFWCC	5
MCRLWFSKLFWRC	5
MCIYRLSDFLVMC	5
MCRMCFRKLFWCC	5
MCIRWPARQSLFWVC	5
MCSNMWKLANCWWVC	5
MCVRCFDQLFWVC	5
MCYKLPIRSHLYWLC	5
MCSNMRKLANRWWVC	5
MCYVCFPHSFICC	5
MCSNMWKLANRWWLC	5
MCGLCFSKLFLCC	5
MCCSRCWSLFWCC	5
MCFRCFLASLWCC	5
MCHLCSSKLFWCC	5
MCTRTSFYGFRYYSC	5
MCVRWPNLNALFWAC	5
MCIYRLPDSWVVC	5
MCRMCFSKLFCCC	5
MCFRCFACLFCCC	5
MCCYRCYRLFLCC	5
MCFVCFRRSFWCC	5
MCIYRLSDFWDLC	5
MCRLCFSEPFWCC	5
MCIYRLSDFWIC	5
MCFRCLLASFWCC	5
MCYKWPIRSYLYWLC	5
MCRLCFSKRFCCC	5
MCCFKFRDLFWICGC	5
MCIRWLARQPLFWLC	5
MCSLCFSKLFWFC	5
MCRLCFSKLSWRC	5
MCIYRLSDFCVFC	5
MCRLCFGKLFWYC	5
MCLPCFMHLFFCC	5
MCSLCFSKLYWCC	5
MCFSCFSKQVWCC	5
MCFSCFSKQFWFC	5
MCICWPARQPLFWLC	5
MCIYRLSDFWAMC	5
MCFSCFWHTFYCC	5
MCRLCFSELFCCC	5
MCRHCFRKSFWCC	5
MCSNIWKLANRWWVC	5

## Sheet: NNK_FGF-R1C_X_FGF-R4
Sequence	FGFR1C_X_FGFR4_reads_R5
MCIYRLSDFWVVC	1015060
MCRLCFSKLFWCC	350891
MCTRTSFYGFWYYAC	358149
MCFRWRLFHHLTPYC	201604
MCCYRCWSLFWCC	144265
MCFRWRLFHHLTPFC	101554
MCSNMWKLANRWWVC	57747
MCSNMWKLANRWWAC	20696
MCFVYPRRQPLYWIC	20028
MCCYNLFSLFWAC	19452
MCVYRLSDFWVVC	9192
MCTKFPWPFPIFWAC	8675
MCCFKFRDLFWVC	10849
MCIYRLSDFWAVC	8301
MCIYRLSDLWVVC	8863
MCSQSWVLYELWRVC	6377
MCYKWPIRSHLYWLC	5672
MCFHCFASRFWCC	8235
MCIYRLSDFWVMC	5155
MCTRTSFYGFRYYAC	9859
MCFVCFRHSFLCC	7035
MCCTRFVNLFWLC	6260
MCWYCFRKSFWCC	5806
MCYVCFSHSFICC	7019
MCCTPCYGLFHCC	6100
MCYKCFTGLFLCC	5242
MCTYRLSDFWVVC	3845
MCIRWPARQPLFWLC	3901
MCRLCFSRLFWCC	4393
MCIYRLSDFWVAC	3641
MCIGKWYTYQYWTRC	4198
MCTRTSFYGFWYHAC	4467
MCIYRLSDFWGVC	3066
MCARTSFYGFWYYAC	4042
MCIYRLSDFWVVCGC	3309
MCYICFSGLFYCC	3906
MCVRCFDQLFWCC	3118
MCIYRLSDFWVLC	4511
MCVPCFSHTFLCC	3241
MCFYRLSDFWVVC	2344
MCRLCFNKLFWCC	2988
MCFRCFLASFWCC	2801
MCIYRLPDFWVVC	2257
MCRLCFCKLFWCC	2708
MCTRTSFYGFWYYVC	3470
MCIYRLSDVWVVC	2244
MCVRWPNLNALFWLC	1979
MCTRTNFYGFWYYAC	2774
MCSRTSFYGFWYYAC	2714
MCIYRLSDSWVVC	2022
MCCYRLSDFWVVC	1850
MCIYRLSDFRVVC	2471
MCCLCFSKLFWCC	2288
MCIYRLSDFLVVC	2006
MCYRHPHSNPLFWAC	1652
MCIYRSSDFWVVC	1818
MCLICFRRLFYCC	2668
MCLYRLSDFWVVC	1854
MCHLCFSKLFWCC	2256
MCIYRLSDFCVVC	2025
MCIYRLSDFWDVC	1785
MCIHRLSDFWVVC	1590
MCFSCFSKQFWCC	2111
MCCFKFRDLFWIC	1550
MCIYRLSDCWVVC	1587
MCIYRLSDFWIVC	1458
MCRLCFGKLFWCC	1712
MCFVCFRHSFWCC	1559
MCIYRLSEFWVVC	1514
MCTKFPWPFPIFWVC	1265
MCTRTSFYGFWYYDC	1480
MCCVRYLARFWLC	1411
MCIRWPARQSLFWLC	1546
MCLRWRLFHHLTPFC	1308
MCFRWRLLHHLTPYC	1634
MCLRWRLFHHLTPYC	1473
MCCFKLCSLFWVC	1030
MCTRASFYGFWYYAC	1324
MCIYRLSGFWVVC	1187
MCRLCFSKPFWCC	1393
MCCSRCFKSFLCC	1195
MCFRCFACLFWCC	1195
MCIYRLSNFWVVC	1072
MCMRTSFYGFWYYAC	1486
MCIYRLSDFWVGC	1133
MCRLCFSKLFWYC	1148
MCTRTSFYGYWYYAC	1380
MCLLWTRHFDRYWVC	1167
MCFVYPRRQPLFWIC	1028
MCRLCFRKLFWCC	2284
MCRLRFSKLFWCC	1160
MCIYCLSDFWVVC	966
MCRSCFSKLFWCC	1108
MCIYRLSDYWVVC	1012
MCCYRCWSLFLCC	1582
MCIYRLTDFWVVC	917
MCIYRLLDFWVVC	904
MCRLCFSKLFWRC	1011
MCFRWRLFHHFTPYC	1010
MCRLCFSKLFWWC	722
MCIYRLSDFWCC	885
MCFRWRLFHHLTPCC	811
MCFRWRLLHHLTPFC	922
MCFRWRLFRHLTPYC	888
MCWHCFRKSFWCC	1016
MCRYRCWSLFWCC	1071
MCRLCLSKLFWCC	1234
MCIYRCWSLFWCC	1071
MCTRTSFYGFWDYAC	1068
MCRLCFSKLFRCC	1050
MCTRTCFYGFWYYAC	1024
MCTRTSFYGFLYYAC	1104
MCRLCFSKLFLCC	1034
MCIYHLSDFWVVC	740
MCIYRLSDIWVVC	780
MCYRFPSSRHLFWAC	900
MCTRTSFYGFWYYTC	883
MCIRWRLFHHLTPYC	740
MCFRWRLFRHLTPFC	698
MCTRTSLYGFWYYAC	1387
MCCTLCFECFYCC	913
MCFRFPTRCPLFLLC	809
MCKRTSFYGFWYYAC	763
MCRLCFSKLFWGC	590
MCPNMWKLANRWWVC	698
MCIYRLSDFGVVC	668
MCIYRLSDFWFVC	690
MCFVYPRRQPLFWVC	626
MCMYRLSDFWVVC	620
MCIFRLSDFWVVC	651
MCFRWRLSHHLTPYC	684
MCTRTSFYGLWYYAC	1526
MCTRSSFYGFWYYAC	804
MCIYRWSDFWVVC	630
MCYVCFEHRFLCC	801
MCSFLLRKLYWCCNC	781
MCRLCFSKLFCCC	1003
MCIYRLSYFWVVC	657
MCTRTSFYGFWHYAC	794
MCFRWRLSHHLTPFC	549
MCRLCFSKLLWCC	1186
MCFRWRLFNHLTPYC	576
MCIYRLSDFWVIC	863
MCRLCFSKLFWCCGC	856
MCTRMSFYGFWYYAC	746
MCICRLSDFWVVC	567
MCTQTSFYGFWYYAC	699
MCTRTSFYGSWYYAC	698
MCIYRLADFWVVC	555
MCYRWRLFHHLTPYC	503
MCTRTSSYGFWYYAC	703
MCLPCFSHLFLCC	653
MCRLWFSKLFWCC	688
MCTRTSFYGFCYYAC	841
MCTRTSFYGFWYYSC	738
MCRLCFSKLSWCC	544
MCRLCSSKLFWCC	584
MCTRTSFHGFWYYAC	580
MCIYRFSDFWVVC	577
MCFRWRLFYHLTPYC	439
MCFRWRLYHHLTPYC	414
MCTKFPWPFPIFWLC	691
MCSNMWKLADRWWVC	404
MCIYRLSVFWVVC	423
MCIYRVSDFWVVC	416
MCCYRCWSLLWCC	812
MCCFKFRDLFWCC	461
MCCFKCFNLFFCC	696
MCIYRMSDFWVVC	402
MCSRWRLFHHLTPYC	393
MCTRTSFYGFWCYAC	534
MCTRTSFYDFWYYAC	513
MCCYRCFISFICC	542
MCRLCFSKLFWC	321
MCFRRRLFHHLTPYC	474
MCFSCFCHTFYCC	542
MCNYRLSDFWVVC	388
MCTRTSFYGCWYYAC	521
MCIYRLSDFWVEC	344
MCTRTRFYGFWYYAC	1090
MCRLCFSELFWCC	438
MCRLCFSKLFWLC	751
MCTTIWLCGFLAPFC	466
MCIRWRLFHHLTPFC	341
MCWSLYRLFWAC	499
MCCTRCFSHFWCC	580
MCTRTSFYSFWYYAC	488
MCTKFPWPFPIFWCC	373
MCPRTSFYGFWYYAC	476
MCTRTGFYGFWYYAC	459
MCFRWRLIHHLTPYC	378
MCTRTSYYGFWYYAC	472
MCLPCFMHLFLCC	452
MCIRWLNKYWLC	290
MCIYRLSAFWVVC	347
MCFRWRPFHHLTPYC	329
MCFRWRLFHHFTPFC	382
MCFRWRLFHHLAPYC	343
MCIRWPARQPLFWIC	303
MCIYRLSDLLVVC	335
MCIGKWYTYQYWTHC	335
MCCYRCWSLFCCC	427
MCRMCFSKLFWCC	444
MCFLCFSKQFWCC	423
MCCYHCWSLFWCC	381
MCFVYPRRQPLYWVC	319
MCRLCFSKLCWCC	364
MCTRTSFFGFWYYAC	434
MCTRTSCYGFWYYAC	439
MCFVCFRASFLCC	397
MCRLCFSKLFWFC	399
MCRLCFSKLFWVVC	290
MCRLCFSKRFWCC	358
MCCYNLFSLFWCC	351
MCFRWRLFHHLAPFC	286
MCFRWRLFHHLTPHC	279
MCCYRCWPLFWCC	407
MCYRWRLFHHLTPFC	290
MCTRTSFYGFWYCAC	419
MCCYRCWSLFWRC	390
MCTRTSIYGFWYYAC	396
MCCYRRWSLFWCC	392
MCTRTSFDGFWYYAC	395
MCFRWRLFHHSTPYC	284
MCRLCFSKFFWCC	348
MCRLCFSKLYWCC	374
MCCTRFVNLFWCC	285
MCFVYPRRQPLYWMC	226
MCFRWRLFHYLTPYC	279
MCRLCFCFSFWCC	342
MCRLCFSNLFWCC	374
MCPNMWKLANRWWAC	271
MCFRWWLFHHLTPYC	268
MCFSWRLFHHLTPYC	281
MCCHRCWSLFWCC	365
MCVRWRYWPAWLC	278
MCLNMWKLANRWWAC	272
MCTRTSVYGFWYYAC	350
MCYKCFTGLFICC	366
MCFRWRLVHHLTPYC	271
MCCYRCWSSFWCC	314
MCFAYPRRQPLYWIC	263
MCSYRLSDFWVVC	263
MCFRWQLFHHLTPYC	240
MCRLCFSKLFGCC	315
MCLNMWKLANRWWVC	267
MCSYGSWYGYSYLAC	309
MCTWTSFYGFWYYAC	346
MCCYNLFSLFWVC	302
MCTRTSFYGFGYYAC	320
MCINRLSDFWVVC	242
MCRPYPRFQPLFLLC	239
MCYRHPHSNPLFWVC	231
MCFRFPTRCPLFLIC	228
MCFRWRLFQHLTPYC	419
MCCYRCRSLFWCC	459
MCCYRCWSLFWCCGC	320
MCRFCFSKLFWCC	326
MCCYRCWTLFWCC	352
MCIYSLSDFWVVC	241
MCCYRCWSLSWCC	335
MCRLCFSKLFWSC	294
MCFRWQLFHHLTPFC	223
MCSLCFSKLFWCC	276
MCTRTSFNGFWYYAC	317
MCCYRCWSLFRCC	369
MCFRCRLFHHLTPYC	253
MCFRWRLFHRLTPYC	213
MCSNMWKLANRWWIC	203
MCRKYPWNTAMYWLC	186
MCTRTSFCGFWYYAC	291
MCFVYPRRQPLYWLC	203
MCFRWRLFYHLTPFC	210
MCFRWRLFHHLTSYC	199
MCVRCFDRLFWCC	228
MCFGWRLFHHLTPYC	222
MCTRTSFYGVWYYAC	274
MCTRTSFYGFWNYAC	270
MCIYRLSDLCVVC	230
MCTRTSFYCFWYYAC	297
MCSNMWKLANRWRVC	255
MCTNMWKLANRWWVC	204
MCFRRRLFHHLTPFC	210
MCRLCFSKLFC	162
MCSFMGHFAPFWC	162
MCFRWRLFHHSTPFC	182
MCRLCCSKLFWCC	270
MCFRWRLFHHLTPSC	186
MCTRPSFYGFWYYAC	283
MCCFKCFNLFYCC	210
MCISRLSDFWVVC	192
MCIYRLSDFWVC	287
MCCYRCWSLFWWC	157
MCSNMWKLASRWWVC	172
MCRVCFSKLFWCC	257
MCSSMWKLANRWWVC	203
MCLYRLSDLWVVC	176
MCRLCFSKLFWIC	185
MCSQSWVLHELWRVC	152
MCFRWRPFHHLTPFC	171
MCCSRCFKSFWCC	200
MCFSWRLFHHLTPFC	188
MCSRWRLFHHLTPFC	171
MCRLCFSKLFWAC	282
MCFRWRLFHQLTPYC	190
MCCYRCWSLCWCC	258
MCFHCFAGRFWCC	217
MCCFKLCSLFWAC	193
MCCYRCWSMFWCC	185
MCFRWRLIHHLTPFC	157
MCFRWRLFHHWTPYC	171
MCCYRCWALFWCC	236
MCIYRLSDFWLVC	191
MCFRWRLFHLLTPYC	179
MCIRWPARQSLFWIC	163
MCRLGFSKLFWCC	228
MCCFKLRDLFWVC	240
MCFRWRLFHHLTPLC	304
MCCYRCWSLFWYC	253
MCTLTSFYGFWYYAC	202
MCFWWRLFHHLTPYC	157
MCRLCFSKHFWCC	200
MCFRWRLYHHLTPFC	156
MCFRWRLFHHLTPDC	146
MCFRWRLCHHLTPYC	188
MCYKWPIRSHLYWIC	175
MCCYRCWSLFWFC	167
MCFRWWLFHHLTPFC	164
MCCYRCWSLYWCC	217
MCIYRLSDFWAC	259
MCFRWRLFHRLTPFC	152
MCFRCRLFHHLTPFC	157
MCTRTSFYGIWYYAC	228
MCCYRWWSLFWCC	228
MCRLCVSKLFWCC	192
MCRLSFSKLFWCC	211
MCIYRLSDVWGVC	157
MCIYRLSDFWVVCGSGC	134
MCIDRLSDFWVVC	144
MCRLYFSKLFWCC	182
MCIYRLSDFWVFC	248
MCCYRCWSVFWCC	192
MCCYRCWSLFC	123
MCFKWRLFHHLTPYC	145
MCRWCFSKLFWCC	197
MCTRTSFYVFWYYAC	204
MCFRCFARLFWCC	157
MCFRWRLFNHLTPFC	136
MCTRTSFYGFWCC	191
MCTRTSFYGFWFYAC	178
MCCWLCFNLFHCC	188
MCFRWRLFHHLTLYC	135
MCIYRLSELWVVC	159
MCFRWRLFLHLTPYC	164
MCFRWRLVHHLTPFC	134
MCCYRCWSLFWC	116
MCIYRLSDFWLC	263
MCFRWLLFHHLTPYC	140
MCSYMWKLANRWWVC	124
MCRLCFSKLFYCC	182
MCSDMWKLANRWWVC	123
MCFRWRLFHYLTPFC	139
MCSNMWKLANRRWVC	174
MCYVCFRHSFLCC	181
MCCRWRLFHHLTPYC	131
MCTRKSFYGFWYYAC	175
MCCFKFRDLFWAC	171
MCCYNLFSLFLAC	196
MCRLCFSMLFWCC	157
MCFVCFRHSFLWC	107
MCYKWPIRSHLYWCC	138
MCFRWRLFQHLTPFC	193
MCFRWRLFHLLTPFC	123
MCFIYPRRQPLYWIC	122
MCCYNLYSLFWAC	152
MCTRTSFYGFWYFAC	172
MCLFHRLYWLVPC	134
MCVRWRLFHHLTPYC	129
MCFRWRLFHHLTPYCGSGC	122
MCFRWRLFHHWTPFC	106
MCSNMRKLANRWWVC	127
MCCYRCWLLFWCC	135
MCFRWRLFHQLTPFC	116
MCRYNLFSLFWAC	127
MCFVYPRRQPMYWIC	120
MCCYRCCSLFWCC	174
MCPHPTLYLSMFWLC	93
MCSNMWKLANRGWVC	101
MCRRWPSREALYWLC	92
MCRFMGHFAPFWC	91
MCFRWRLFHHLMPYC	107
MCFGWRLFHHLTPFC	106
MCFRWRLFLHLTPFC	90
MCIYRLSDLWGVC	127
MCSNIWKLANRWWVC	143
MCYVCFSHSFIWC	89
MCTRTSFYGFWYYACGSGC	166
MCCYRCWSLVWCC	155
MCIYRLTDLWVVC	99
MCIGKWYTYQYWTCC	108
MCIYCLSDLWVVC	97
MCLPCFRHLFLCC	169
MCFRWRLFHHLTPYCGC	105
MCFRLRLFHHLTPYC	100
MCRLCISKLFWCC	121
MCIYRLSDFLVLC	95
MCFVYPRRQPLYWCC	106
MCCHRYRALFWIC	101
MCLLCFSKLFWCC	119
MCFRWRLFHHLTPFCGSGC	91
MCSYRCWSLFWCC	135
MCFHCFANRFWCC	113
MCCYCCWSLFWCC	172
MCCCRCWSLFWCC	129
MCRLCFSKLVWCC	134
MCFVCFRHSFLYC	106
MCSNMWRLANRWWVC	93
MCVHCFDQLFWCC	153
MCSNMWKLANCWWVC	80
MCCYRCWSLFWGC	96
MCRFKFRDLFWVC	106
MCCYRFWSLFWCC	141
MCSQSWVLYKLWRVC	78
MCVRWPNLNALFWCC	102
MCFMWRLFHHLTPYC	99
MCRLCFSKLFWVC	130
MCCYRCWSLIWCC	121
MCCYKLFSLFWAC	122
MCCFRCWSLFWCC	127
MCFRFPTRCPLFWLC	135
MCIYRLSDFWYYAC	115
MCCLRCFLSFLCC	89
MCSNMWKLAIRWWVC	85
MCCFKFRNLFWVC	109
MCSNVWKLANRWWVC	87
MCCFKFRDLFWLC	165
MCRLCFIKLFWCC	113
MCSHMWKLANRWWVC	74
MCIYGLSDFWVVC	74
MCSNMWKPANRWWVC	74
MCRLSDFWVVC	73
MCYVCFSKLFWCC	103
MCIYRLSDLWVLC	82
MCWYCFRKSFWYC	96
MCWYRCWSLFWCC	108
MCVRWRLFHHLTPFC	85
MCTRTSFYGFSYYAC	125
MCLVCFSNLFWCC	106
MCLLWTRHFDRYWIC	84
MCCYRGWSLFWCC	107
MCRLCYSKLFWCC	111
MCYKWPTRSHLYWLC	69
MCSNMWKLANRWCC	100
MCCYRCWSWFWCC	125
MCSNTWKLANRWWVC	68
MCFVYPRRQPLFWLC	79
MCIYRLSDGWVVC	77
MCIYRLSEFWGVC	68
MCIYRLSDFWVWC	68
MCKYHRVFYLAPLQC	67
MCYYRCWSLFWCC	112
MCTKFPWPFPIFWVVC	67
MCTRTSFYGFWYYGC	142
MCCYRCWSFFWCC	127
MCIYRLSDFFVVC	86
MCMKCFRYRYWCC	94
MCFYRCWSLFWCC	108
MCFRWRLFHHLTTYC	75
MCFVYPRRRPLYWIC	79
MCTRTSFSGFWYYAC	109
MCIYRLSDFWDVCGC	73
MCCFKFRDLYWIC	77
MCTRTSFYGFWYYPC	108
MCTNMWKLANRWWAC	73
MCSNMWKLANRWGVC	63
MCTKFPWPLPIFWAC	63
MCCYRCWSLFWVC	83
MCWYCFRKSFWWC	62
MCSNMWKLAYRWWVC	71
MCRLCFSKLIWCC	97
MCSKMWKLANRWWVC	110
MCFRWLLFHHLTPFC	73
MCFRWRLFHHVTPYC	71
MCYRHPHSNPLFWCC	75
MCCYRCGSLFWCC	108
MCFVYPRRQPLYWTC	70
MCFVCFSKLFWCC	100
MCIYRLSDFCVLC	71
MCRLCFSKIFWCC	102
MCCTRFVNLFWIC	79
MCIYLLSDFWVVC	60
MCCYRCWSLFYCC	119
MCCFKFRDLFWVVC	60
MCRLCFSTLFWCC	83
MCSNMWKLANRWWCC	59
MCFRLRLFHHLTPFC	68
MCRRTSFYGFWYYAC	97
MCFVYPRRQPWYWIC	68
MCFRWRLCHHLTPFC	58
MCIYRLSDCWGVC	58
MCFVYPRRQPLYWSC	86
MCAKFPWPFPIFWAC	57
MCTRTSFYGFWYNAC	90
MCWYCFRKSFLCC	78
MCVYRLSDFWAVC	57
MCSNMLKLANRWWVC	57
MCCYNLFSLLWAC	111
MCTRTSFYGFWYDAC	90
MCFPCFCFTFLCC	85
MCCTPCYGLFYCC	87
MCWVCYQHSFICC	95
MCCFRFRDLFWVC	73
MCTRTSFYGFWVVC	55
MCVYRLSDLWVVC	67
MCSNMWKLSNRWWVC	63
MCFRWRLFPHLTPYC	55
MCFRWRRFHHLTPYC	70
MCTAIWLCGFLAPFC	73
MCTRTIFYGFWYYAC	93
MCCYRCYRLFFCC	96
MCIYRLSDFWVLCGC	55
MCIYRLSDLWFVC	55
MCSNMWKLANRWWGC	69
MCIYRLSHFWVVC	54
MCFHCFARRFWCC	100
MCCRWRLFHHLTPFC	62
MCIYRLSDYWVVCGC	72
MCFVYPRRQPSYWIC	67
MCSNMWKLADRWWAC	62
MCFSCFRHTFYCC	102
MCFRWRLFHHLMPFC	65
MCCYRCWSLFGCC	100
MCCYRCLSLFWCC	86
MCCYNLFSLFCAC	90
MCSSMWKLANRWWAC	62
MCIYRLSDFWVVVC	52
MCIRWPARQTLFWLC	64
MCLPCFCHLFLCC	86
MCIYRLSDFSVVC	51
MCCNRCWSLFWCC	96
MCSNMWELANRWWVC	51
MCIYRLSDCWVVCGC	51
MCFKWRLFHHLTPFC	59
MCVRCFNQLFWCC	123
MCFRWRLFHHLTPVC	50
MCFRWRLFHHLTSFC	63
MCNQSWVLYELWRVC	50
MCYVYPRRQPLYWIC	67
MCIYRLSDFWCVC	49
MCIYRPSDFWVVC	49
MCYKWPIRSHLYWVC	75
MCFRWRLFHHLTLFC	49
MCFWWRLFHHLTPFC	49
MCSNMWKLANHWWVC	49
MCIYRLSDFWGVCGC	49
MCCTRCFSRFWCC	81
MCRLCFSQLFWCC	68
MCFRWRLFHNLTPYC	57
MCIYRLSDLWVGC	80
MCFVYPRRQPVYWIC	61
MCSYMWKLANRWWAC	60
MCFRWRQFHHLTPYC	63
MCSNMWKLAKRWWVC	66
MCCYNLFSLFWVVC	47
MCIGKWYTYRYWTRC	69
MCIVYPRRQPLYWIC	61
MCTRTSFYGFRYYVC	87
MCSNMWKLANRWRAC	46
MCLVYPRRQPLYWIC	62
MCCYRCWSLYWIC	60
MCSFLLHKLYWCCNC	76
MCRLCFSKLFFCC	63
MCIYRLSDWWVVC	45
MCIYRLSDFWGLC	45
MCSNLWKLANRWWVC	77
MCFVYPRRQPLYRIC	54
MCFRWRLFHHVTPFC	44
MCCFKFRDLFWFC	57
MCTRRSFYGFWYYAC	64
MCIKFPWPFPIFWAC	44
MCCTRFVNLFWRC	58
MCSNMWNLANRWWVC	43
MCIYRLSDFRVVCGC	57
MCCYRCWSLFWAC	66
MCSNMRKLANRWWAC	70
MCIYRLSDFWAVCGC	42
MCIYRLSDFWAMC	42
MCCYNLFSLFWIC	56
MCVYRLSDFWVMC	42
MCSNMWKPANRWWAC	50
MCCTPCYGLFLCC	68
MCCYNLLSLFWAC	56
MCFRWRLFHPLTPYC	50
MCCYRCWSLFWLC	108
MCGYRCWSLFWCC	71
MCIGKWYTYQYWTYC	41
MCIYRFSDLWVVC	41
MCCSRCWSLFWCC	61
MCIYRLSDFCAVC	41
MCRLCFSKLFWCCC	41
MCIYRLWDFWVVC	41
MCFLYPRRQPLYWIC	50
MCYRFPSSRHLFWCC	50
MCWSLYRLFWCC	56
MCFRWRLFHHLSPYC	51
MCIYRLSDLWAVC	40
MCSNMWRLANRWWAC	40
MCIGRWYTYQYWTRC	58
MCCFKYRDLFWVC	53
MCCYRSWSLFWCC	61
MCCYRYWSLFWCC	58
MCSNMCKLANRWWVC	47
MCIRWPARQPLFWCC	50
MCRTRFVNLFWLC	50
MCFVYLRRQPLYWIC	49
MCFRWRLFHHLTRYC	50
MCGLCFSKLFWCC	62
MCIYRLSVLWVVC	49
MCWMREDLYAPWVLC	38
MCIYRLSDFWVVFGC	38
MCFMWRLFHHLTPFC	46
MCIYRLSEFCVVC	50
MCSICFRRLFYCC	56
MCIYRLSYFWVVCGC	47
MCTRTSFYGFWYSAC	60
MCVYRLSDFWVAC	38
MCIYRLTDFCVVC	38
MCIYRFSDFWVLC	38
MCTKFPWPSPIFWAC	37
MCIYRLSDVLVVC	37
MCSNTWKLANRWWAC	37
MCIYRLSDFWFLC	37
MCSNMWKLVNRWWVC	37
MCIYRLSYFWVLC	37
MCTRTSFYGFWYYACGC	56
MCIYRLSDFWIC	36
MCCYRCWSLFFCC	36
MCCYSCWSLFWCC	45
MCCVRYLARFWCC	36
MCFVCFSHSFICC	67
MCFHCFASHFWCC	56
MCFVYPRCQPLYWIC	48
MCIYRLSEFWVLC	36
MCFRSRLFHHLTPYC	36
MCCYKFRDLFWVC	55
MCLPCFMHLFWCC	47
MCIYRLSDLWVMC	35
MCIYRLSYFLVVC	35
MCVRCFEQLFWCC	50
MCIYRLSDFWFVCGC	35
MCIYRWSDLWVVC	43
MCTRTSFYRFWYYAC	48
MCCLKFRDLFWVC	45
MCFRCFLASFWWC	35
MCWSLYRLFWVC	35
MCCYRCWSLFWSC	69
MCIYPLSDFWVVC	34
MCSRSWVLYELWRVC	42
MCFVYPRHQPLYWIC	43
MCIGKWYTYQYWARC	34
MCIYRLSEFWVGC	34
MCSNMWKLSNRWWAC	34
MCIYRLSDPWVVC	34
MCFRWRLFHHMTPYC	43
MCCYNLFSLFWLC	65
MCLMRNNISSPWTSC	46
MCSNMWKLANRRWAC	33
MCCYNLFSLYWIC	45
MCCYNLFSLYWLC	33
MCCFKFRDLYWLC	33
MCYVCFSRSFICC	60
MCCFLCFCSFLCC	43
MCIYRLTEFWVVC	33
MCYTWYKLRQRYWAC	43
MCILHGLIYWAPKQC	33
MCTKFPWPFPIFWIC	46
MCIYRLSDYRVVC	44
MCFYRLSDLWVVC	42
MCRYCFRKSFWCC	68
MCFFYPRRQPLYWIC	33
MCSNMWKLTNRWWVC	33
MCIYRLPDLWVVC	42
MCLVCFRHSFLCC	58
MCFRWRLFHHMTPFC	32
MCCYRCWSLYWLC	32
MCYKWPIRSHLYWSC	32
MCCYNLSSLFWAC	32
MCIFRLSDLWVVC	32
MCCYRCWSLFWIC	45
MCFVYPHRQPLYWIC	32
MCFRCFLASFWYC	40
MCIYRLSDCWDVC	32
MCIYRLSDFWALC	44
MCTRTSFYGFWSYAC	42
MCKYHRVFYLAPLSC	46
MCYVCFRHSFWCC	42
MCFVYPRRQLLYWIC	32
MCPYPTLYLSMFWLC	31
MCYKWPIRSPLYWLC	31
MCFVCFRRSFLCC	62
MCIYRLSEFLVVC	31
MCSNMWKLAHRWWVC	31
MCFHCLSDFWVVC	31
MCFRWRLFHHLSPFC	31
MCWPCFARSFLCC	46
MCRLCFTKLFWCC	58
MCSVYPRRQPLYWIC	31
MCSNMWKLANCWWAC	30
MCLYRLSDFCVVC	30
MCIGKWYTYQYWTLC	30
MCIRWPARQSLFWCC	39
MCIYRLSDYWDVC	30
MCLYRLSDFWVGC	30
MCLYRLSDFWVLC	30
MCSNMWMLANRWWVC	30
MCCFKFRDLFWMC	30
MCAYRLSDFWVVC	30
MCVRTSFYGFWYYAC	55
MCFRYPTRCPLFLLC	30
MCFSCFCKLFICC	48
MCCYRCYRLFYCC	41
MCFVCFRHLFLCC	46
MCIRWPARRPLFWLC	30
MCYKCFAGLFLCC	42
MCCIKFRDLFWVC	49
MCFRWRLFHHLTPFCGC	29
MCVYRLSDVWVVC	29
MCTRTSFYGCWDYAC	38
MCIYRLSDFRDVC	44
MCSYRLSDFWGVC	38
MCFRGRLFHHLTPYC	29
MCVYRLSDFWGVC	29
MCTRTSFYGFWYYEC	29
MCYKWPIRSHLYWFC	47
MCLYRLSEFWVVC	28
MCSHMWKLANRWWAC	28
MCFVYPCRQPLYWIC	28
MCSIMWKLANRWWVC	28
MCYKWPIRLHLYWLC	28
MCTRTSLYGFWDYAC	28
MCIYRLSDFWYVC	28
MCFRWRLFHHLTHYC	41
MCSNMWKLANRWC	28
MCFRWRLFPHLTPFC	28
MCFRWRLFDHLTPYC	28
MCSNIWKLANRWWAC	43
MCSNMWKLANLWWVC	28
MCFVYPRRQPLHWIC	43
MCCYNLFSSFWAC	37
MCSNMLKLANRWWAC	28
MCLYRLSDFLVVC	28
MCRQSWVLYELWRVC	45
MCIYRLSDFWVVRGC	28
MCIYRLSDFWVGCGC	28
MCIYRLSDSWVVCGC	28
MCFRWRLFHHLTPYYGC	27
MCSDMWKLANRWWAC	27
MCIYRWSDVWVVC	27
MCIYRLSDLRVVC	36
MCSNVWKLANRWWAC	27
MCFSCFSRQFWCC	38
MCYVCFSHTFICC	54
MCYKWPIRPHLYWLC	27
MCFRWRQFHHLTPFC	27
MCPLWTRHFDRYWVC	39
MCCTRFVNLFWPC	27
MCIYRWSDFWGVC	27
MCIYRFSDFLVVC	27
MCIYRLSDFLAVC	26
MCYKWPIRSHLFWVC	26
MCYVCFSHPFICC	34
MCCFKFHDLFWVC	26
MCSNMWKLANRWWDC	26
MCCFKSRDLFWVC	26
MCIYRLSDSWGVC	26
MCTRTNFYGFWYYVC	35
MCWYCFRKSFWLC	66
MCIYRLSDFCVVCGC	40
MCCYSLFSLFWAC	42
MCSNMWKLAIRWWAC	26
MCTRFPWPFPIFWAC	26
MCTGTSFYGFWYYAC	36
MCRFCFSKLFLCC	37
MCLLWTRHFDRYWAC	26
MCIYRLSDFCVGC	26
MCYKCFSKLFWCC	39
MCRLCFSKLFWCCGSGC	41
MCSNKWKLANRWWVC	26
MCTRTSLYGCWYYAC	36
MCSQSLVLYELWRVC	26
MCSNMWKLAYRWWAC	25
MCCYNLFSLFRAC	25
MCTPTSFYGFWYYAC	41
MCTRTSFYGFWYHVC	39
MCFRWRLFHHLTPNC	25
MCIYRFSDFCVVC	25
MCANMWKLANRWWVC	25
MCYVCFSHSFIYC	47
MCCFKLRDLFWAC	25
MCTYRLSDLWVVC	25
MCYKWRLFHHLTPYC	25
MCTKFPRPFPIFWAC	36
MCTKFPWPYPIFWAC	25
MCFRSRLFHHLTPFC	25
MCSQPWVLYELWRVC	25
MCCYNSFSLFWAC	25
MCSNMWKLAKRWWAC	34
MCIYRLSDFWVVCDC	24
MCIYRLSDIWGVC	24
MCNYRLSDFWVLC	24
MCIYRWSDCWVVC	24
MCSNMWKLANRGWAC	24
MCCYNLFSLSWAC	24
MCFRWRLFHHLPPYC	24
MCIYRLSYLWVVC	24
MCCTRCWSLFWCC	35
MCTRTNFYGFRYYAC	24
MCFACFRHSFLCC	37
MCYRHPHSNPLFWLC	53
MCRLCFNRLFWCC	24
MCARTSFYGFWYYVC	33
MCIYRLSDFWVTC	24
MCARTSFYGFWYHAC	33
MCCYNLFSLFWACGC	36
MCCFKFRDLLWVC	49
MCFVCFRHTFLCC	35
MCIYRLSDVWDVC	23
MCFVCFRASFWCC	35
MCFHCFASLFWCC	35
MCIRWPARQPLFWVC	34
MCTKFPWPFPILWAC	35
MCTRTRFYGFWDYAC	34
MCIYRLSDFWVVWGC	23
MCFRWRLFHPLTPFC	23
MCVYRLSDFWVVCGC	23
MCSTMWKLANRWWVC	23
MCCTRFVNLFCLC	23
MCFRWRRFHHLTPFC	23
MCIYRLSDLWDVC	44
MCIRTSFYGFWYYAC	32
MCRLCFSKLFFWCC	37
MCYICFSGPFYCC	39
MCSNRWKLANRWWVC	23
MCFRCRLFHHFTPYC	23
MCCTRYVNLFWLC	32
MCSNMWKLANRWCVC	23
MCCYNLFSLFWSC	38
MCTRTSFYGFRYHAC	40
MCSNMWKHANRWWVC	23
MCIYRLSDLWVVCGC	40
MCFRCFSASFWCC	22
MCCYNLFSFFWAC	22
MCCDRCWSLFWCC	38
MCTRTSFYGFRYYDC	22
MCIYRLSDCGVVC	22
MCVPCFSRTFLCC	36
MCYRWPIRSHLYWLC	22
MCHICFSGLFYCC	34
MCIYRLSDVWAVC	22
MCSKMWKLANRWWAC	34
MCFYRLSDFWVMC	22
MCNYRLSDFWVVCGC	22
MCSNMWKLDNRWWVC	22
MCIYRSSDFWAVC	22
MCCHNLFSLFWAC	22
MCFRCFASLFWCC	22
MCTRTRFYGLWYYAC	30
MCIYRLSDSWDVC	22
MCTYRLSDFWAVC	22
MCIYRLSDFGGVC	22
MCHLCFSRLFWCC	34
MCIYRLSDSWAVC	22
MCIYRLSDLLVLC	22
MCIVCFRHSFLCC	30
MCIYRLSDFLGVC	22
MCFVCFSHTFICC	34
MCNYRLSDFWVGC	22
MCIYRLSDVCVVC	22
MCCFKFRDLSWVC	21
MCTRTSINGFWYYAC	36
MCIYRSSDFWVVCGC	21
MCTKFPLPFPIFWAC	21
MCIYRLSDFWVVYGC	21
MCIYRLSDFWGGC	21
MCSNMWKLATRWWVC	21
MCCSKFRDLFWVC	21
MCIYRRSDFWVVC	21
MCRYCFSKLFWCC	21
MCLLWTRHFDRYWLC	21
MCIYRLSDFCGVC	21
MCCTRLVNLFWLC	21
MCWYCFRKSFWVVC	21
MCLYRLTDFWVVC	21
MCFVCFRHPFLCC	21
MCTRTSLYGFRYYAC	32
MCTRTRLYGFWYYAC	41
MCIYRLSDVWVLC	21
MCIYRLSDFLVMC	21
MCCFKFRDSFWVC	21
MCCFKFRDLFLVC	21
MCRLCFSKLCWGC	20
MCIYRLSDYWAVC	20
MCCYRCWSLFLFC	20
MCFGKWYTYQYWTRC	29
MCSQSWLLYELWRVC	20
MCCFKFRDLFCVC	20
MCTRTSFYGLWDYAC	20
MCFYRLSDFCVVC	20
MCSVCFRHSFLCC	20
MCSNMWKLANRWWLC	31
MCCFKFRDLYWVC	20
MCFKWPIRSHLYWLC	20
MCTKFPWPFPMFWAC	33
MCSKSWVLYELWRVC	20
MCAFWCFHYIPDC	20
MCCTRFVNPFWLC	20
MCRLFFSKLFWCC	38
MCTTIWLCGFRAPFC	20
MCCYRCWSLFWVVC	20
MCHKCFTGLFLCC	20
MCYRHPHSNPLYWLC	20
MCSNMWKLANRCWVC	20
MCIYRLSDFWGMC	20
MCRLCFGRLFWCC	20
MCTKSPWPFPIFWAC	20
MCFVWRLFHHLTPYC	20
MCCTRFANLFWLC	20
MCHVCFSHSFICC	20
MCIYRSSDSWVVC	20
MCFVYPRRQSLYWIC	29
MCIYRLSDFWVDC	34
MCTRTSFDGFWDYAC	27
MCIGEWYTYQYWTRC	27
MCSQSWVLYERWRVC	19
MCIRWPARLSLFWLC	19
MCIRCFDQLFWCC	19
MCTQTSFYGFRYYAC	31
MCIYRLSDFLFVC	19
MCFLCFSKLFWCC	19
MCCLCFSRLFWCC	30
MCVYRLSDFWVLC	29
MCWYCFRKSFWRC	30
MCIGKWYTYQHWTRC	19
MCVRWPARQPLFWLC	19
MCYMKSYHSHEWISC	19
MCCFKFRDLFWVCGC	19
MCRLCFRHSFLCC	36
MCFVYPRRKPLYWIC	31
MCRLCFSKLFSCC	37
MCTRTSFYGFFYYAC	30
MCCFKCFNLFICC	29
MCIYRLSDFWAAC	19
MCSYNLFSLFWAC	19
MCSNMWKLASRWWAC	19
MCIRWPARQSLYWIC	19
MCVGKWYTYQYWTRC	19
MCIYRLSDRWVVC	19
MCFYRLSDFWAVC	19
MCYKCFTGLSLCC	19
MCIYRLSDSWVLC	27
MCFVCFRHSLLCC	31
MCSNMWKLANHWWAC	19
MCSNMWNLANRWWAC	19
MCIYRFSEFWVVC	18
MCMYRLSDLWVVC	27
MCLYRLSDFWAVC	18
MCIYRLSEVWVVC	18
MCFSCFSKLFWCC	54
MCFYRLSDFWVLC	18
MCVRWPARQSLFWLC	26
MCYKWRLFHHLTPFC	18
MCSNMWKLANRWWTC	18
MCFVYSRRQPLYWIC	18
MCYKWPIRSHLYWMC	18
MCTKFPWPFPIFWTC	18
MCIYRLSDFWEVC	18
MCSNMCKLANRWWAC	18
MCCYRCWSLFSCC	28
MCIYRLSDSCVVC	18
MCYACFSHSFICC	33
MCLYRLSDFWVVCGC	18
MCTRTSFHGFRYYAC	18
MCIYRLSDVWVVCGC	18
MCFVYPRRQPLCWIC	18
MCYRHPHNNPLFWAC	18
MCIYRLSVSWVVC	18
MCSNMWKLANRWVVC	18
MCSNMGKLANRWWVC	17
MCSQSWVLYELWRAC	17
MCIYCLSDLLVVC	17
MCYKCFTGLFHCC	26
MCIYRSSDLWVVC	17
MCTKLPWPFPIFWAC	17
MCYKCFTGLFLWC	17
MCWYCFRKSFC	17
MCFRWRMFHHLTPYC	28
MCKYHRVFYLAPLNC	17
MCIYRLSDFWDLC	17
MCIHRLSDFWVVCGC	27
MCIYRLTELWVVC	17
MCIYRVSDCWVVC	17
MCRYRLSDFWVVC	17
MCIYRLSDFWVVCAC	17
MCTRTSFYGFGDYAC	17
MCIYRLSDFLVVCGC	17
MCIYRLPDFWVVCGC	17
MCMYRLSDVWVVC	17
MCFRWGLFHHLTPYC	17
MCCYNLFPLFWAC	30
MCFLCFASRFWCC	17
MCRLRLSKLFWCC	17
MCCYRWWSLLWCC	27
MCLYRLSDFWGVC	17
MCFVHPRRQPLYWIC	26
MCSNMWKLANRWWFC	17
MCCTRFVDLFWLC	17
MCCYRFWSLFLCC	27
MCYKWPIRSHSYWLC	17
MCVYRLSDFLVVC	17
MCWYCSRKSFWCC	17
MCCYNLFSLFC	17
MCSNMWKFANRWWVC	17
MCCYRCRTLFWCC	30
MCFVYPRRQPLDWIC	17
MCTRTSFYGFWYWLC	17
MCVYRLSDSWVVC	17
MCFHCFSSRFWCC	17
MCCYDLFSLFWAC	17
MCARTSFYGFRYYAC	37
MCFRWRLFHLFTPYC	17
MCCTRSVNLFWLC	17
MCFRWRLFHHLTRFC	17
MCCYPCWSLFWCC	16
MCYKWPIRSHLHWLC	16
MCLVCFRHSFWCC	16
MCSHCFASRFWCC	16
MCVRCFGQLFWCC	16
MCYRFPSSRQLFWCC	27
MCRLCFSRLFWGC	16
MCLGKWYTYQYWTRC	16
MCWYRFRKSFWCC	16
MCIYRLSDAWVVC	16
MCYRHPHSNPLFC	16
MCRLCFSKLFGGC	16
MCLPCFSHLFICC	28
MCINRLSDYWVVC	16
MCTYRLSDFWVAC	16
MCIYRLSYFCVVC	16
MCFVYPRRQPLFWCC	31
MCCTRFVNLFWFC	16
MCIYRLPDFRVVC	16
MCIYRLTDFWGVC	16
MCIFRLSDFCVVC	16
MCYKWPFRSHLYWLC	16
MCIYRLSELLVVC	16
MCSNMWELANRWWAC	16
MCRLCFSGLFWCC	28
MCTRTSFYGFWYHDC	16
MCIYRVSDFWGVC	16
MCTKFPWPVPIFWAC	16
MCRLCFSKVFWCC	25
MCMRWPNLNALFWLC	16
MCRLRFCKLFWCC	16
MCIYRLLDSWVVC	16
MCIYRLPDFWAVC	16
MCYKWPIRSHLYRLC	16
MCIYRLSDFWVVCVC	15
MCYVCFSHSLICC	15
MCFVRFRHSFLCC	26
MCTKFPCPFPIFWAC	15
MCTKFPWPFPIFCAC	15
MCCLCFNKLFWCC	15
MCSRTSFYGFRYYAC	15
MCYKWPIQSHLYWLC	15
MCCYGCWSLFWCC	23
MCIYRLSDLWVAC	15
MCTRTCFYGFCYYAC	15
MCIYRLSDFWLLC	15
MCTRTSNYGFWYYAC	15
MCIYCLSDLCVVC	15
MCIYRLSDFLVFC	24
MCCYNLSDFWVVC	15
MCIYRLTDFWVGC	15
MCNYRLSDLWVVC	15
MCFRWRLFHHLTAYC	15
MCCTRFVNLFLLC	15
MCYVCFPHSFICC	27
MCSNMWKLANRWWVCGSGC	15
MCSNMWKLANRWCAC	15
MCFRWRLFHHLTPYCSC	15
MCWYCFRRSFWCC	24
MCRLCLSKLFWCCGC	26
MCIYRLSDHWVVC	15
MCTKFPWPFPTFWAC	15
MCIYRLSDFWVMCGC	15
MCRLCFSRLFLCC	15
MCIYRLSYFWFVC	15
MCFVYPRRQPLFWAC	15
MCSNMWTLANRWWVC	15
MCFHCFASRFRCC	15
MCYKCFTGLLLCC	15
MCIYRLSDFWVVCCC	15
MCFVYPRRQPLYWNC	15
MCFHCFASRSWCC	15
MCRTPCYGLFHCC	28
MCIYRLSDFWAGC	15
MCFVYPLRQPLYWIC	15
MCIYRLSDFCFVC	15
MCIYRLPDFWVMC	15
MCRLCFCRLFWCC	15
MCRLCFSRLFCCC	23
MCIYRLSEIWVVC	15
MCCTRCFSLFWCC	15
MCRFCFSKLFCCC	26
MCCFKFRDMFWVC	15
MCFRWRLFDHLTPFC	15
MCFHCFASRFCCC	24
MCTTIWLCGFQAPFC	15
MCLHCFASRFWCC	26
MCFHCFASRFWYC	24
MCWYCFRKSLWCC	24
MCCYRLSDFWVAC	15
MCFHCFASRFWRC	24
MCWYCCWSLFWCC	23
MCIYRLSEFWDVC	15
MCWYCFRKSFRCC	15
MCHKWPIRSHLYWLC	15
MCWYCFRKRFWCC	36
MCCTRFVSLFWLC	14
MCVHRLSDFWVVC	14
MCFRCFLASFLCC	22
MCSNMWKLANRLWVC	14
MCWYCFQKSFWCC	24
MCIYRLTDFWVLC	14
MCVYRSSDFWVVC	14
MCCYRWWSLCWCC	14
MCRFKFRDLFWIC	14
MCFRCFAGLFWCC	14
MCMYRLSDFWGVC	14
MCIYRLSDIWDVC	14
MCVYRLTDFWVVC	14
MCIYRLSYFWGVC	14
MCCFKLCSLFWCC	14
MCSIMWKLANRWWAC	14
MCTRTSFYGHWYYAC	14
MCMYRLSEFWVVC	14
MCWYNLFSLFWAC	14
MCVYRLSDFCVVC	14
MCCFKCFNLFLCC	14
MCFRWRLVHQLTPYC	14
MCIYRLSDTWVVC	14
MCVRCFDKLFWCC	14
MCVYRLPDFWVVC	14
MCLYRLSDLLVVC	14
MCMYRLSDFWVLC	14
MCYRYPHSNPLFWVC	14
MCRLCFRKLCWCC	14
MCFVYPRRQPLYCIC	14
MCWYCLRKSFWCC	14
MCTRTSFYGLWYHAC	14
MCSQSWVLYELRRVC	14
MCWSLYGLFWAC	14
MCIYRFTDFWVVC	14
MCTRTSIYGFRYYAC	14
MCIYRSSDFWVLC	14
MCCFKFRDLFRVC	14
MCFHCFASRFWVVC	14
MCTRTSLHGFWYYAC	14
MCIYRLSDLFVVC	14
MCSFMGHFAPFWCC	24
MCVYRLSDCWVVC	14
MCVPCFSHTFLYC	14
MCCKWPIRSHLYWLC	14
MCTRTSFYGFQYYAC	27
MCRLCFSRLFWCCGC	14
MCRLCFCKLFCCC	14
MCFRWRLFHHLTPYYDC	14
MCSQSWVLYEPWRVC	14
MCYVCFSHSFICCGC	25
MCFSWRLFHHFTPYC	22
MCFRWRLFHHLVPFC	14
MCDYRLSDFWVVC	14
MCCYNLFSLCWAC	14
MCIYRLSDLWLVC	14
MCIYRLSDFLVGC	14
MCCIRFVNLFWLC	13
MCIYRLSDFWVVCC	13
MCTKFSWPFPIFWAC	13
MCFRWRLFHHLTTFC	13
MCRLCFSKLFLFC	22
MCFHCLASRFWCC	13
MCCFKFRNLFWIC	13
MCWYCFWKSFWCC	13
MCFTRFVNLFWLC	13
MCYVCFEHQFLCC	13
MCIYRQSDFWVVC	13
MCCFKFRDLCWVC	13
MCYHCFASRFWCC	13
MCSRTNFYGFWYYAC	13
MCIRWPTRQPLFWLC	13
MCFVYPRRQPLNWIC	13
MCPIPVKYLSLYWLC	13
MCYKWPIRSLLYWLC	13
MCIYRLSDFFVLC	13
MCVYRLSDFWIVC	13
MCVRCFDQPFWCC	13
MCIYRLSDYWGVC	13
MCIYRLSDCWAVC	13
MCIGKWYTYQYWTPC	13
MCRLCFSKQFWCC	32
MCRLCLSKLFWGC	13
MCCSRFVNLFWLC	13
MCIYRLSDFWVVCSC	13
MCARTNFYGFWYYAC	13
MCCFKFRGLFWVC	13
MCKRTNFYGFWYYAC	13
MCFVCFRHLFWCC	21
MCSYRLSDLWVVC	23
MCTRSSFYGFRYYAC	24
MCIYHLSDFWAVC	13
MCFVYPRRQPFYWIC	13
MCPLCFSKLFWCC	21
MCSNMWKLANSWWVC	13
MCTRTSVYGFWDYAC	13
MCTNFPWPFPIFWAC	13
MCTRTSFYAFWYYAC	13
MCRLCFSRLFWWC	13
MCYKWPIRSQLYWLC	13
MCVPCFSHMFLCC	13
MCTRTSCYGFWDYAC	13
MCYVRFSHSFICC	13
MCCYRCWALCWCC	13
MCRLCFSKLLWGC	13
MCIHCFASRFWCC	13
MCFVCPRRQPLYWIC	13
MCSQSWVPYELWRVC	13
MCIHWPARQPLFWLC	13
MCYKWPIRSHWYWLC	13
MCSQSWVLYELWWVC	13
MCIHRLPDFWVVC	13
MCFVCFRHSFSCC	13
MCTRTNFYGFWYHAC	24
MCRLCFSKLLWCCGC	13
MCFYRLSDVWVVC	13
MCTRTSFYGSRYYAC	21
MCFRWRLFHNLTPFC	13
MCRLCFSRLFWYC	13
MCRLRFSKLFWCCGC	13
MCIYRLSDLWIVC	13
MCKRTSFYGFRYYAC	24
MCIYRLTDFWAVC	13
MCVYRLSDIWVVC	13
MCCYRWWSLFLCC	13
MCRLCFRRLFWCC	23
MCTRWPARQPLFWLC	13
MCTRTSFYGFRYYTC	13
MCVYRLSEFWVVC	13
MCTRTRFYGCWYYAC	13
MCFVCFRHSFLRC	25
MCFHCFASRFWC	13
MCYKWPIRSHLCWLC	12
MCCVCFSHSFICC	12
MCFVCSRHSFLCC	12
MCRLCFSKLFCFC	12
MCYECFSHSFICC	12
MCYKCPIRSHLYWLC	12
MCYVCFSHSFTCC	12
MCFRCFLASFWCCGC	12
MCIYRLTDFLVVC	12
MCFVCFRHSCLCC	12
MCTKFPWSFPIFWAC	12
MCTYRLSDFWVMC	12
MCFHRFASRFWCC	12
MCIRWPARQSLFWRC	12
MCIYCLSDFLVVC	12
MCIYRLSESWVVC	12
MCIYRFSDFWFVC	12
MCIYRLSDFWVCC	21
MCTRTSFYGLRYYAC	21
MCFKCFTGLFLCC	12
MCLICFRRPFYCC	12
MCTRTSFYGSWYHAC	12
MCFHCFACRFWCC	12
MCIYRLSDCWGVCGC	12
MCFYCLSDFWVVC	12
MCTRTRFYGYWYYAC	12
MCTYRLSDFWVVCGC	12
MCIYRLSDFWFGC	12
MCYRHPHSNPLFWIC	12
MCIFRLSEFWVVC	12
MCCFKFCDLFWVC	12
MCFRWRMFHHLTPFC	12
MCCTPCYGLFHRC	20
MCTRTSFNGFRYYAC	23
MCFVCFSHAFICC	12
MCIYRVSDVWVVC	12
MCIYCLSDFCVVC	12
MCYKCFTGPFLCC	12
MCCCNLFSLFWAC	12
MCCYLCWSLFWCC	21
MCIYRLSDFRAVC	22
MCIYRLADLWVVC	20
MCRLWCSKLFWCC	12
MCFWWRLFHHFTPYC	12
MCIYRLSDSRVVC	12
MCCYNLFSLYWAC	20
MCTRTNFYGFWYYDC	12
MCFRWRLFHHLPPFC	12
MCCFKFRDLFWGC	12
MCRLCFRKLFWGC	12
MCLYRFSDFWVVC	12
MCCTRFVNLFWLCGC	12
MCTRTSFDGCWYYAC	12
MCIYRLSEFWVVCGC	12
MCIYRWSDFWVVCGC	12
MCIRWPARQPLFWPC	12
MCCFNLFSLFWAC	12
MCIYRLKDFWVVC	12
MCLYRLSDFWVMC	12
MCFYRLPDFWVVC	12
MCCYNLFSVFWAC	12
MCIYRLSGLWVVC	21
MCFHCFASRCWCC	12
MCTRTSLYGYWYYAC	21
MCFHCFASRLWCC	20
MCFRWRLFHHLTPIC	12
MCRQCFSKLFWCC	12
MCCFKFRDLFC	12
MCFRWPLFHHLTPYC	12
MCMRTNFYGFWYYAC	12
MCSNLWKLANRWWAC	21
MCIYCLSDFWGVC	12
MCLLWTRHFDRYWCC	12
MCFVYPRRQPLYLIC	12
MCTRTSFYGFRCYAC	12
MCCTLCFERFYCC	23
MCIYRFSDLLVVC	12
MCTKFPWPFSIFWAC	12
MCSQSWVLYELWRGC	12
MCSQSWALYELWRVC	12
MCFHCFASRFLCC	12
MCGFLLRKLYWCCNC	12
MCIYCLSDFWVLC	12
MCCTRLSDFWVVC	12
MCLYRLSDLCVVC	12
MCYVCFSHSFMCC	12
MCIYRLSDGWGVC	12
MCRLRFSKFFWCC	12
MCCYRLSDFWAVC	12
MCIYRLCFSKLFWCC	29
MCRYRCWTLFWCC	12
MCRLCFSKLFWYYAC	23
MCKRTSFYGFWYHAC	12
MCVRWPNLNPLFWLC	12
MCCTPCYGLFHYC	12
MCIYRLSDLGVVC	20
MCIRWRLFYHLTPYC	11
MCTKFPWLFPIFWAC	11
MCCFQFRDLFWVC	11
MCFVCFRHSSLCC	22
MCFHCFASCFWCC	11
MCSQSWVLYEHWRVC	11
MCLYRLTDLWVVC	11
MCFRCFLASFWVVC	11
MCFRCFLASFWLC	21
MCIQSWVLYELWRVC	11
MCIYRLADFCVVC	11
MCFVYPRRHPLYWIC	11
MCTRTSFYGFRHYAC	11
MCLLWTRHFDRYYAC	11
MCFRWRLFHHLRPYC	11
MCCTRCFSYFWCC	11
MCTRTSLYGLWYYAC	21
MCLRWRLLHHLTPYC	11
MCTRTSFYGFWYYNC	11
MCTYRLSDVWVVC	11
MCARCFDQLFWCC	11
MCIYRLSDCWVLC	11
MCRLCFSKLCGCC	11
MCFYRLSDFWGVC	11
MCCYRCCTLFWCC	11
MCPYMWKLANRWWVC	11
MCHYRLSDFWVVC	11
MCIYRLSVFLVVC	11
MCMRTSFYGFRYYAC	11
MCCTPCYGLFHCCGC	11
MCIYRLLDFWVVCGC	11
MCIYCLSEFWVVC	11
MCCYNLFSLFWDC	11
MCRLRFSKLFWRC	11
MCLRWRLLHHLTPFC	11
MCTWTSFYGFRYYAC	11
MCRLCFSRPFWCC	11
MCIYRFSDVWVVC	11
MCIYRLSDFRVLC	11
MCIYRLSDFWVSC	11
MCIYRLADFWGVC	11
MCTRTSIYVFWYYAC	11
MCFVCFRHSFLCCGC	11
MCRMCFSKLYWCC	11
MCFLCFRHSFLCC	11
MCRLCFSKLLWRC	11
MCFVYFRHSFLCC	11
MCTRANFYGFWYYAC	11
MCTRTSFDGLWYYAC	21
MCCTPCYGLLHCC	22
MCIYRLPDFWVLC	11
MCIGKWYTYQYWIC	20
MCCPCFLRTFLCC	11
MCYLCFSKLFWCC	11
MCSNMWKLTNRWWAC	11
MCIYRLSDSLVVC	11
MCYVCFEHRFICC	20
MCARTSFYGFWYYDC	11
MCSNMWKLVNRWWAC	11
MCFRWRLLHHFTPYC	11
MCSNMWKLANRWGAC	11
MCLRTSFYGFWYYAC	11
MCIYRLTDIWVVC	11
MCWYCFRKSFWAC	21
MCHLCFRKLFWCC	11
MCFSCFSKQLWCC	11
MCFRCFMASFWCC	11
MCLLWTRHFDRYWVVC	11
MCARASFYGFWYYAC	11
MCSNMWKLANSWWAC	11
MCYICFPGLFYCC	11
MCIYRLSYVWVVC	11
MCRLRFSKLLWCC	11
MCIYRLSNLWVVC	11
MCWYCFRKSFWC	11
MCTRTRSYGFWYYAC	11
MCIYRFSDFWVVCGC	11
MCIYRLLYFWVVC	11
MCVYRLLDFWVVC	11
MCFVCFRHSFLC	11
MCTKFPWPCPIFWAC	11
MCIFRLSDFWGVC	11
MCIPCFSHTFLCC	11
MCLRCFLASFWCC	11
MCIFRLSDFWAVC	11
MCTRTSSYGFCYYAC	11
MCIYRLLDFWVLC	10
MCIYRLSGFWGVC	10
MCCTRFVNLFWVC	10
MCICKWYTYQYWTRC	10
MCRLCFNKLFLCC	10
MCCLCFCKLFWCC	10
MCIYRLPDFCVVC	10
MCVRWPKLNALFWLC	10
MCYKWPIRSRLYWLC	10
MCWYCFRKCFWCC	10
MCFVCFRHSLWCC	10
MCYVCFSHSFIRC	10
MCIYRLSDFWYC	10
MCFRWRLLNHLTPYC	10
MCCTPCYGLFQCC	10
MCCSRCFESFLCC	10
MCYKRFTGLFLCC	10
MCLRWRLFHHFTPYC	10
MCIYRLSDILVVC	10
MCIRWPARQPPFWLC	10
MCIGKWYTYQYWLC	10
MCRSCFSRLFWCC	10
MCFVCFRRSFWCC	10
MCVICFRRLFYCC	10
MCFRWRLFHHLTHFC	10
MCTRTCFYGFLYYAC	10
MCCFKFRDLFGVC	10
MCSNMWKLANRWLAC	10
MCYYNLFSLFWAC	10
MCSNMWKFANRWWAC	10
MCCYNLVSLFWAC	10
MCYVCSSHSFICC	20
MCFTWRLFHHLTPYC	10
MCVYRLADFWVVC	10
MCSNMWKLANRWWVCGC	10
MCCYNLFSLFFAC	10
MCANMWKLANRWWAC	10
MCTRTSSYGFRYYAC	18
MCTRTCFYGFWYHAC	10
MCFVYPRRQQLYWIC	10
MCIYRLSDFWVVCRC	10
MCMYRWSDFWVVC	10
MCIHRLSDLWVVC	10
MCIYRLLDFWGVC	10
MCHRWRLFHHLTPFC	10
MCTRTCYYGFWYYAC	19
MCCYRLSDFWVMC	10
MCTRTSFYGFWYLAC	10
MCTRTRFYGFRYYAC	10
MCIHRLSDYWVVC	10
MCCYNLFSLFWTC	10
MCIYCLSDVWVVC	10
MCFRWRLILHLTPYC	10
MCCLRFSKLFWCC	10
MCIYRLSDFWVFCGC	10
MCPRTSIYGFWYYAC	18
MCIYRLTDLCVVC	10
MCIYRLSGVWVVC	10
MCCIKFRDLFWIC	10
MCFVFPRRQPLYWIC	10
MCTRTSFYGWWYYAC	10
MCRLGFSKLFCCC	10
MCIYRLSNFCVVC	10
MCRLRFSKLFGCC	10
MCIYRFSYFWVVC	10
MCSNMWKLAHRWWAC	10
MCNYRLSDFLVVC	10
MCTRTSFYGFRDYAC	19
MCMRTSFYGFWYYVC	10
MCMYRLSDFCVVC	10
MCIYCLTDFWVVC	10
MCCYNLFSLIWAC	10
MCIYRMSDLWVVC	10
MCIYRLSYCWVVC	10
MCCYRLSDLWVVC	10
MCCYRCWSLWWCC	10
MCIYRLSDFCVWC	10
MCNYRLSDYWVVC	10
MCIYRLSELCVVC	10
MCYVCFSHSFLCC	10
MCCLCFSKLFWRC	10
MCTRTSLYGCWDYAC	10
MCFHCFASRFWCCGC	10
MCLYRLSDFWLVC	10
MCIYRLTEFCVVC	10
MCFHCFASRYWCC	10
MCFHCFASRFWWC	10
MCSQSCVLYELWRVC	10
MCTYRLSDFWGVC	10
MCFRWRLFHDLTPYC	10
MCTYRLPDFWVVC	10
MCLYCLSDLWVVC	10
MCRLCFSKLCCCC	10
MCWFKFRDLFWVC	10
MCFHCFASRFWGC	10
MCCLCFSKLFLCC	10
MCFRCFLASFWRC	10
MCLYCLSDFWVVC	10
MCWYCFRKSSWCC	10
MCTRTSFYGTWYYAC	10
MCCVRYLARFWPC	10
MCSQSRVLYELWRVC	10
MCIYRLLDFWAVC	10
MCYKWPIRSHFYWLC	10
MCCFKCFNLFWCC	10
MCTRTSCYGFRYYAC	10
MCRLCLSKLLWCC	10
MCFRWRLFYHFTPYC	10
MCFRCWSLFWCC	10
MCIHRLSDSWVVC	10
MCTRTSFYGFWYYIC	9
MCFRGRLFHHLTPFC	9
MCIGKWYTYLYWTRC	9
MCIYRLLDLWVVC	9
MCFHCSASRFWCC	9
MCFSWRLYHHLTPYC	9
MCTRASFYGFWYYVC	9
MCSQSWVLYELWRVCGC	9
MCSNMWKLANLWWAC	9
MCIHRLSDFWAVC	9
MCRLCLSRLFWCC	9
MCCLCFSKPFWCC	9
MCTKFPWPLPIFWVC	9
MCIRWPARLPLFWLC	9
MCCFKLCSLFWIC	9
MCFVCFRHSFFCC	9
MCWNMWKLANRWWVC	9
MCRLRFNKLFWCC	9
MCFDYPRRQPLYWIC	9
MCTYRLSDFWVLC	9
MCCYRCWTLFLCC	9
MCCYRWWALFWCC	9
MCIRWPAHQPLFWLC	9
MCCTPCYGLFHC	9
MCTRTSFYGIWYHAC	9
MCRLCLSKLCWCC	9
MCIYRLSDCRVVC	9
MCFSWRLLHHLTPYC	9
MCIYRLSDVWFVC	9
MCSLCFCKLFWCC	9
MCFYRLSDSWVVC	9
MCLSRLSDFWVVC	9
MCFSCFSKQFLCC	9
MCCSLCFRLFLCC	18
MCSQSWVLYELLRVC	9
MCSNMWKLANRWWACGSGC	9
MCFYRLSDFWDVC	9
MCRLCFNKPFWCC	9
MCCFMFRDLFWVC	9
MCIYRFSVFWVVC	9
MCVYRLSDFWDVC	9
MCCFKCFSKLFWCC	9
MCCYRCWALFLCC	9
MCIYRLSYSWVVC	9
MCFRWRLFHRFTPYC	9
MCTRTSFYCYWYYAC	9
MCCYRCCSLFLCC	9
MCIYRLSDLWVFC	9
MCIYRWSDVWGVC	9
MCMYRLSDSWVVC	9
MCTRTSFYGCCYYAC	9
MCYKCFTGLFLRC	9
MCIYRWSDFWAVC	9
MCYMRDSADDMWRTC	9
MCFVWFRHSFLCC	9
MCRLCFCKPFWCC	9
MCIYRLPDCWVVC	9
MCYVCLSHSFICC	9
MCFRWRLFHLFTPFC	9
MCIYRLSDMWVVC	9
MCYKCSTGLFLCC	9
MCIYRSTDFWVVC	9
MCIYRLSDFWVECGC	9
MCTRTCFYVFWYYAC	9
MCRLRFSKLCWCC	9
MCTRTSFYGFWYHSC	9
MCCYNLFSLVWAC	9
MCLRWRLIHHLTPYC	9
MCIRWPACQPLFWLC	9
MCSRWRLLHHLTPFC	9
MCTRTCLYGFWYYAC	9
MCIYRLSDCLVVC	9
MCSRTSFYGFWYYVC	9
MCVRCFDQLFWRC	9
MCIYRLSDFGDVC	9
MCRFRFSKLFWCC	17
MCIYRLSYFRVVC	9
MCWYCFRKSFCCC	9
MCIGKWYTYHYWTRC	9
MCFSWRLFHHFTPFC	9
MCIYRLSEFWFVC	9
MCIFRLSDFLVVC	9
MCRLRFSNLFWCC	9
MCFRWRLFHHLKPYC	9
MCFWWRLIHHLTPYC	9
MCHLCFNKLFWCC	9
MCIYRLSDYRVVCGC	9
MCCRPCYGLFHCC	9
MCFRWRLVHQLTPFC	9
MCCTPRYGLFHCC	9
MCCFKFRDLIWVC	9
MCRLRFSKLFWGC	9
MCTRTSIYGFWCYAC	9
MCIYRLTDFWLVC	9
MCWYCFRKSFWIC	9
MCIYRLLDFLVVC	9
MCIYCLSDFWVGC	9
MCCYRCWSLCWGC	9
MCFVCFWHSFLCC	9
MCIYRLSGFWDVC	9
MCTKFPWPFPFFWAC	9
MCTRPSFYCFWYYAC	9
MCYKWPIRSHLYGLC	9
MCYVCFSHSFIFC	9
MCFHCFLASFWCC	9
MCYKWPVRSHLYWLC	9
MCCYRCRSLFLCC	17
MCRFCFSKLFRCC	9
MCTRTSFYGYWYYVC	9
MCSRTSFYGFWYHAC	9
MCFRCFASRFWCC	9
MCCTRFVNLLWLC	9
MCTGKWYTYQYWTRC	9
MCRPCFSKLFWCC	9
MCIYRLSVFCVVC	9
MCVRWPNLNAPFWLC	9
MCVRWPNSNALFWLC	9
MCCFKLCSLFWLC	9
MCLICFRRLFYYC	9
MCYICFSGLFWCC	17
MCTRTSFYGYRYYAC	9
MCYFCFSGLFYCC	9
MCIRWPAHQSLFWLC	9
MCCFKIRDLFWVC	9
MCAPCFSHTFLCC	9
MCAKFPWPFPIFWVC	9
MCSFKFRDLFWVC	9
MCRFKLCSLFWVC	9
MCPRTSFYGFRYYAC	9
MCYKWPIRTHLYWLC	9
MCCTRFVNLFRLC	9
MCIYRLSDFCVAC	9
MCTRSSFYGFWYYVC	9
MCTRASFYGFRYYAC	17
MCFVCFGHSFLCC	9
MCVPRFSHTFLCC	9
MCRMCFSKLFWSC	9
MCRFCFSKLFFCC	9
MCSQSWVLYGLWRVC	9
MCWMREDLYAPWVPC	9
MCYKRPIRSHLYWLC	9
MCWCCFRKSFWCC	9
MCWYCLSDFWVVC	9
MCTRMSFYGFRYYAC	9
MCIGKWYTHQYWTRC	9
MCMRTSFYGFWYHAC	9
MCWYCFRKSFWGC	9
MCTRTSLYGFWYHAC	9
MCVYHLSDFWVVC	9
MCRLCFSRLFWRC	9
MCIRWPARQPLLWLC	9
MCCYNLFSLYWVC	9
MCCTPCYGLSHCC	9
MCSNMWQLANRWWVC	9
MCVPCFPHTFLCC	9
MCTRTSSYGFWDYAC	9
MCVPCFSHTSLCC	9
MCCYNLFFLFWAC	9
MCYRHPHSNPLLWAC	9
MCFSCFCHTFWCC	9
MCVRWPNLNALFWPC	9
MCFRWRLFHHLTPYLLC	9
MCRKYPWFTPLFNLC	9
MCFVCFSNLFWCC	9
MCTYRLSDSWVVC	9
MCFVYPRRQPLYGIC	9
MCVRCFDQLFRCC	9
MCRLCFNKLFWRC	9
MCTKFPWPFPISWAC	9
MCFRFPTRCPLFWCC	8
MCRLCLCKLFWCC	8
MCTRTSFYGFWVYAC	8
MCRLCFCKLLWCC	8
MCFRWRLLYHLTPYC	8
MCTRTRFYGFWYYSC	8
MCSYRCWALFWCC	8
MCFVYPRRQPLYWICGSGC	8
MCIFRLSDFWVLC	8
MCRLWFSKLFWCCGC	8
MCSRTSFYGFWYYDC	8
MCIYRLPDFWVGC	8
MCIYRLSNFWGVC	8
MCIYRLSDFWVVSGC	8
MCCYRCWSLLWCCGC	8
MCIYRLSDFLDVC	8
MCLYRLSDSWVVC	8
MCCTPWYGLFHCC	8
MCRLRFRKLFWCC	8
MCCLCFSKLFWGC	8
MCIYRLSEFWAVC	8
MCIYRWSEFWVVC	8
MCIYRFSDFWAVC	8
MCTRTCFYGFWYCAC	8
MCFRCLLFHHLTPFC	8
MCIYRLSDFWLGC	8
MCIYRLSDFWFLCGC	8
MCIYRFSDFWVGC	8
MCCYNLFSWFWAC	8
MCCYRRWSLFWCCGC	8
MCIRWPARQPLFLLC	8
MCIYRWSDFWVGC	8
MCTYRLSDYWVVC	8
MCSHSWVLYELWRVC	8
MCRFCFSKLLWCC	8
MCIYRLSDFGVVCGC	8
MCRLCCRKLFWCC	8
MCLYRLPDFWVVC	8
MCRLCFRKLLWCC	8
MCIYRFSDFWLVC	8
MCLYRLSELWVVC	8
MCTRPSSYGFWYYAC	8
MCIYRLSGCWVVC	8
MCTRTSFYGFWHYVC	8
MCSYRCWSLLWCC	8
MCFRWLLFYHLTPYC	8
MCFSRRLFHHLTPYC	8
MCTRTSYYGLWYYAC	8
MCRLCFSNLFCCC	8
MCTRTSFYGVWDYAC	8
MCTRTRFYGWWYYAC	8
MCTRTCFYGFRYYAC	8
MCFFRLSDFWVVC	8
MCIYRLSDFCVFC	8
MCCFKCRDLFWVC	8
MCRLRFSKLFCCC	8
MCCYRCCSFFWCC	8
MCICRLSDFWAVC	8
MCIYRLSDCWFVC	8
MCTRTSIKGFWYYAC	8
MCFRWGLFHHLTPFC	8
MCCYRCWALLWCC	8
MCIYRLPEFWVVC	8
MCIYRLSECWVVC	8
MCRLCFCNLFWCC	16
MCMARQIQYYRLWMC	8
MCIYRLSDFWGEC	8
MCFRWCLFHHLTPFC	8
MCIHRLSDFWVLC	8
MCRLCFSKFYWCC	8
MCSNMWKLANRWWSC	8
MCLRWRLFHYLTPFC	8
MCIYRLSDFRVGC	8
MCIYRLSDLWVIC	8
MCYRWRLFYHLTPFC	8
MCTLTSFYGFRYYAC	8
MCYIRFSGLFYCC	8
MCTRTSFYGFWDYVC	8
MCIYRLLDCWVVC	8
MCRLCFSSLFWCC	8
MCTRTRFHGFWYYAC	8
MCARMSFYGFWYYAC	8
MCIYRLSEFWVWC	8
MCIYRWSDFWDVC	8
MCIYRGSDFWVVC	8
MCIYRLSDFWAEC	8
MCSNMWKLANRWWVVC	8
MCIYRMSDSWVVC	8
MCTKFPWPFPIFRAC	8
MCFVYPSRQPLYWIC	8
MCYKWPIRSHLDWLC	8
MCIYRFSDLCVVC	8
MCVYRWSDFWVVC	8
MCRLCLSKLFGCC	8
MCTRTNFYGFWDYAC	8
MCRLCLSKLSWCC	8
MCIYRLSDLCVLC	8
MCSNMWKLPNRWWVC	8
MCTRTSFYGYWYHAC	8
MCIYRLSDFWDGC	8
MCTRTSFFGFWYHAC	8
MCCFKLHDLFWAC	8
MCRLCFSNLFWCCGC	8
MCIYRLSDFRFVC	8
MCFRCFACLFWYC	8
MCIYRLSYFWAVC	8
MCFRCLLASFWCC	8
MCARWPNLNALFWLC	8
MCRLCFNKLFWYC	8
MCYICFSGLFYWC	8
MCYKCLTGLFLCC	8
MCIYRLSDFCLVC	8
MCTKFPWPFPVFWAC	8
MCARTSFYGYWYYAC	8
MCCTRFVNLSWLC	8
MCFRWPLFHHLTPFC	8
MCVPCFSHTFLWC	8
MCCTCFVNLFWLC	8
MCCFKFRELFWVC	8
MCIRWRLYHHLTPYC	8
MCFYCFASRFWCC	8
MCTKFLWPFPIFWAC	8
MCNYRLSDFWDVC	8
MCVYRLSNFWVVC	8
MCCTRFLNLFWLC	8
MCFTPCYGLFHCC	8
MCTYRLSNFWVVC	8
MCIGKWYTYQYRTRC	8
MCCTPCHGLFHCC	8
MCYICLSGLFYCC	8
MCIRWPARQPLVWLC	8

## Sheet: NNK_FGF-R3C_X_FGFR1C
Sequence	FGFR3C_X_FGFR1C_reads_R5
MCHYCFNKLFLCC	1652580
MCSYCFNKLFLCC	383917
MCHPTRLHLWLCCNC	183442
MCFFCFDRLFLCC	102415
MCFYCFDSLFLCC	42900
MCYSCFSHLFFCC	24413
MCHYCFNRLFLCC	24693
MCFSCFCRMFYCC	21675
MCHFRPNKFTAWLPC	13635
MCYFCFHHLFLCC	17646
MCFYCFSNLFLCC	13807
MCYFCFSKLFLCC	12682
MCHYCFSRLYLCC	13460
MCYYCFNKLFLCC	11496
MCHYCFNKLFICC	7441
MCIPCFKHLFLCC	11841
MCYSCFSALFYCC	9320
MCRYCFNKLFLCC	7980
MCFYCFRGTFLCC	9219
MCFYCFNCLFICC	7009
MCLYCFDALFLCC	7211
MCHYCFDKLFLCC	6602
MCDTWTLYQRFWTPC	4579
MCHHCFNKLFLCC	5541
MCFYCFDATFLCC	5365
MCHYCFNKPFLCC	5572
MCQQWNLYTRHWHIC	3173
MCCSCFDRLFYCC	4270
MCSKCFNDLYYCC	4664
MCFYCFNRLFICC	3956
MCIFDIHMPFIPC	4590
MCHFCFDFLFLCC	4254
MCHYCFNKLFPCC	4407
MCHYCFNKLFLCCGC	4873
MCHYCFSKLFLCC	4575
MCFYCFNKLFLCC	4466
MCRGFYDAFWFC	3483
MCVFDSFLPFIIC	3319
MCHYCLNKLFLCC	6003
MCHYCFNKLLLCC	5277
MCHYCFNKLSLCC	4024
MCSYCFNRLFLCC	3950
MCEQRWPRSLLWFPC	2734
MCDVLIYHYWLPC	3536
MCHYCFNKLFLC	2047
MCLYCFNKLFLCC	6423
MCHFCFNKLFLCC	3302
MCIFDLFCPFIVC	2125
MCHYRFNKLFLCC	3140
MCQWFVWEFSYPTNC	1865
MCHYCSNKLFLCC	2840
MCIFDNWLPFIYC	2102
MCYDLLGPAFTFC	1911
MCVYDIFVPFIIC	1915
MCHYCFDFLFLCC	2644
MCFSCFAGLFFCC	2537
MCPYCFNKLFLCC	4056
MCHYCFNKLFLRC	2699
MCIFDTFLPFIFC	1911
MCHYWFNKLFLCC	2219
MCHYCFNKLFFCC	2195
MCHYCFNKFFLCC	2346
MCHYCFNKLFLFC	2053
MCTFDLFLPFIFC	2099
MCHYCFYKLFLCC	2099
MCLYDSFLPFIFC	1559
MCVYDLFLPFIYC	1565
MCTFDTFLPFIFC	1425
MCYSCFNKLFLCC	1903
MCHYCFNNLFLCC	2267
MCISCFQRLFYCC	1478
MCHCCFNKLFLCC	1567
MCNYCFNKLFLCC	1634
MCVFDLFLPFIFC	1125
MCHYCFNELFLCC	1492
MCYSCFSHLFLCC	1442
MCFYCFDRLFLCC	1522
MCYFCFNKLFLCC	1395
MCHYCFNKLFLYC	1455
MCLFDTFLPFIFC	1010
MCCDYYEVYWFGC	1171
MCHYCCNKLFLCC	1418
MCHYCFNKLFLGC	904
MCFSCFSRLFMCC	1041
MCHYCFNKLFRCC	1078
MCHYGFNKLFLCC	1202
MCIFDIFMPFILC	934
MCLFDSFLPFILC	869
MCHYCFKKLFLCC	2182
MCSHCFNKLFLCC	1204
MCIYCFNFNFLCC	1109
MCHYCFNKLYLCC	1248
MCHYCFNKLFHCC	952
MCHYYFNKLFLCC	1097
MCHSCFNKLFLCC	1071
MCHYCVNKLFLCC	1099
MCSYCFNKPFLCC	1146
MCHYCFDFLFFCC	976
MCSYCFDKLFLCC	1107
MCFSCFRRMFYCC	994
MCQYCFNKLFLCC	2135
MCYFCFDRLFLCC	1056
MCFYDLFLPFIFC	699
MCLFDTFVPFIFC	710
MCHYCFTKLFLCC	869
MCHYCFIKLFLCC	903
MCFSCFSGLFFCC	935
MCSYCFNKLSLCC	921
MCRPTRLHLWLCCNC	700
MCFFCFNRLFLCC	902
MCSYCFNKLFLRC	831
MCLFDSFVPFIFC	761
MCLFDIFLPFIIC	682
MCHPTRLHLWPCCNC	601
MCCFDSFLPFIFC	1234
MCYPTRLHLWLCCNC	581
MCLFDIFCPFILC	620
MCHPTRPHLWLCCNC	604
MCLFDLFCPFIFC	607
MCHYCFNKHFLCC	834
MCSYCFNKLFLC	502
MCIFDLFVPFIFC	591
MCIRSLRYPFWFC	568
MCVFDVFCPFIFC	587
MCSYCFNKLLLCC	1174
MCSYCLNKLFLCC	1187
MCSYCFNKLFLCCGC	926
MCHPTRLHLWLCRNC	507
MCQQWNLYTRHWHSC	762
MCHYCFNKLFLWC	441
MCHYCFNMLFLCC	689
MCHPTRLHLWLWCNC	514
MCHYCYNKLFLCC	729
MCHYCFNKLCLCC	791
MCHYCFHKLFLCC	663
MCSYCFSKLFLCC	718
MCSYCFNKLFPCC	770
MCHNCFNKLFLCC	661
MCSYRFNKLFLCC	694
MCFYCFRCLFICC	631
MCHYCFDSLFLCC	627
MCYFCFDSLFLCC	678
MCYSCFSHLFYCC	578
MCHYCFSRLFLCC	724
MCVFDSFLPFVLC	367
MCTYCFNKLFLCC	745
MCHYCFNKIFLCC	611
MCYFDPHFIFIPC	687
MCVFDSFLPFILC	491
MCEYWSIYTPRWQLC	327
MCLFCFDRLFLCC	699
MCYSCFDRLFYCC	513
MCLFDIFLPFIFC	564
MCFSCFDRLFLCC	557
MCVSCFQRLFYCC	521
MCQPTRLHLWLCCNC	532
MCIFDNWLPFIFC	388
MCVFDSFLPFIFC	422
MCSYCSNKLFLCC	612
MCHYCINKLFLCC	611
MCHYCFDALFLCC	535
MCHYFFNKLFLCC	545
MCLFDLFVPFVFC	380
MCVYDLFLPFIFC	365
MCHPTRLHLRLCCNC	413
MCFFCFYRLFLCC	578
MCQQWNLYTRHWHNC	320
MCSFCFNKLFLCC	542
MCFYCFDSLFICC	381
MCHPTRLHLWLCCSC	409
MCTFDIFLPFILC	339
MCHPTRLHSWLCCNC	327
MCHPTRLHLWRCCNC	369
MCETWYYFEITKHLC	360
MCRSCFDRLFYCC	390
MCHDCFNKLFLCC	457
MCCFDIFLPFIFC	372
MCHPIRLHLWLCCNC	315
MCHYCFNTLFLCC	411
MCFFCFNKLFLCC	484
MCQQWNLYTRHWHTC	366
MCFSCFDHLFHCC	441
MCHPTRFHLWLCCNC	305
MCSYCFKKLFLCC	641
MCFFCFRRTFLCC	401
MCHPTRLHFWLCCNC	363
MCSYCFNKLFLGC	281
MCQMRDTPYGAWVPC	403
MCFFCFDHLFLCC	402
MCRFYELFWSFPC	608
MCSYCFNKLFRCC	341
MCHYCFNQLFLCC	352
MCHYCFNKRFLCC	419
MCFYCFDALFLCC	382
MCTFDVFLPFIFC	288
MCDYCFNKLFLCC	400
MCHPTRLHLWLRCNC	288
MCYSCFHHLFYCC	374
MCHPTRLYLWLCCNC	283
MCFFCFDSLFLCC	415
MCSYCFNKLYLCC	346
MCLFDLHLPFIFC	246
MCSYCFNKLFLYC	365
MCHSTRLHLWLCCNC	260
MCFDVNMVTGHVTVC	222
MCHTRANFYEPWLPC	282
MCHPTRLHVWLCCNC	256
MCVPCFKHLFLCC	382
MCVFDLFLPFTFC	224
MCAYCFNKLFLCC	403
MCSCCFNKLFLCC	344
MCSYCFNKLFLFC	364
MCHPTRLHLWLGCNC	257
MCIWDSFVPFILC	191
MCSFCFDRLFLCC	328
MCHPTWLHLWLCCNC	232
MCFLCFDRLFLCC	533
MCVYDIFVPFIFC	219
MCHYCFNKLFVCC	300
MCHYCFSHLFFCC	276
MCVFDIFIPFVLC	242
MCYDTWATKYWWTFC	223
MCHYCFNKLFLSC	453
MCIFDLFAPFIYC	215
MCSYWFNKLFLCC	364
MCSYCFNKLCLCC	308
MCSYCFNKFFLCC	369
MCYFCFSRLFLCC	334
MCSYCFNELFLCC	339
MCLFDSFVPFVFC	365
MCHPTRLHLCLCCNC	283
MCLFDSFLPFIFC	202
MCYSCFCRMFYCC	243
MCFFCFDRLFLCCGC	308
MCHPTRLHLWLCCDC	204
MCFFCFDRPFLCC	277
MCYDLLGPAFIFC	203
MCFYCFDKLFLCC	295
MCQMRDTPYSAWVPC	196
MCHPTRLHLWHCCNC	181
MCHPTRHHLWLCCNC	180
MCHYSFNKLFLCC	343
MCHYCFNKLILCC	244
MCFYCFSCLFLCC	255
MCSYCFNNLFLCC	367
MCWSCFKSLFFCC	286
MCFFCFGRLFLCC	256
MCLYCFDSLFLCC	299
MCIFDIHMPFILC	203
MCFFCFCRRFLCC	227
MCTFDTHLPFIYC	182
MCFFCFDRLLLCC	325
MCQQWNLYTRHWHMC	134
MCTLMWHATHPWHVC	134
MCFFCFDRLSLCC	227
MCFFCFDRLFLRC	216
MCHPTQLHLWLCCNC	179
MCHYCFNKLVLCC	224
MCFSCFDHLFYCC	188
MCFFCLDRLFLCC	295
MCFHCFDSLFLCC	217
MCFFCFDRLFPCC	211
MCSNCFNKLFLCC	282
MCIFCFDRLFLCC	214
MCSYCFYKLFLCC	307
MCRSCFHSLFYCC	230
MCIFDTFLPFIIC	148
MCFSCFAGLFLCC	228
MCFFCFDRLFLC	125
MCHPTRLRLWLCCNC	168
MCYFCFHHLFICC	156
MCHYCFDRLFLCC	317
MCIFDIFMPFIFC	153
MCIFDSFFPFIPC	203
MCHPTRRHLWLCCNC	162
MCRFYEFFWSFPC	196
MCSYCCNKLFLCC	251
MCFFCFHHLFLCC	194
MCHPTLLHLWLCCNC	177
MCHYCFNCLFICC	190
MCYYCFSKLFLCC	203
MCIFDLFSPFIFC	164
MCHYCFSNLFLCC	191
MCHPTRLQLWLCCNC	165
MCNPTRLHLWLCCNC	136
MCHYCFNKLFLCCGSGC	207
MCIFDIFMPFIPC	169
MCLFDSFLPFIVC	167
MCHPTRLHLLLCCNC	185
MCSYCFNKLFLWC	121
MCFFCFCRMFYCC	175
MCTFDTHFPFITC	165
MCHPARLHLWLCCNC	140
MCFFCSDRLFLCC	213
MCYFCFHRLFLCC	174
MCLFDSLLPFIFC	133
MCSYCFNKLFICC	159
MCSKCFNDLFYCC	196
MCVYCFNFLFLCC	183
MCSSCFNKLFLCC	205
MCFFDLFCPFIYC	134
MCVFDSLLPFIFC	135
MCYSCFSHLFICC	137
MCHTRANFYEPWLLC	122
MCHFCFHHLFLCC	167
MCLFDIFCPFIFC	120
MCSYCFNKLFQCC	162
MCSYYFNKLFLCC	208
MCFYCFGALFLCC	193
MCIFDSFFPFIFC	136
MCFYCFSNLFICC	122
MCFFCFSKLFLCC	147
MCCFDSFLPFVIC	110
MCIYCFNKLFLCC	186
MCVFDSWLPFVYC	129
MCFSCFCHMFYCC	161
MCFFCFDRLFLGC	93
MCSYCVNKLFLCC	200
MCFFRFDRLFLCC	169
MCSYCFNKLFLSC	168
MCHLTRLHLWLCCNC	115
MCHPTRLHWWLCCNC	117
MCLFDSFLPFIPC	123
MCHPTRLHLWFCCNC	121
MCQGFYDAFWFC	186
MCYSCFHHLFLCC	166
MCCYCFERLFLCC	110
MCFSCFSHLFFCC	139
MCFYCFSKLFLCC	207
MCIFDTFLPFIYC	109
MCIFDLWLPFTAC	115
MCHFRPNRFTAWLPC	112
MCYFDIFLPFIFC	114
MCFSCFAGLFYCC	110
MCHYCFNRLFICC	223
MCSDCFNKLFLCC	143
MCQQWNLYTRHWHFC	81
MCHPTRLHLWLCYNC	122
MCYSCFSKLFLCC	126
MCIWDSFVPFIFC	132
MCWYCFNKLFLCC	131
MCDQRLSPYTPWFLC	88
MCFWHKRSDFWLQFC	79
MCEMRQSSFLPWTPC	115
MCFYCFYSLFLCC	129
MCFFCFDCLFLCC	140
MCLFDLFYPFIIC	110
MCIFDTFLPFILC	133
MCFFCFVRLFLCC	144
MCHPTRLHLWLCGNC	101
MCHYCFDFLFICC	101
MCYYCFSRLYLCC	151
MCTFDLFLPFIYC	118
MCEQRWPCSLLWFPC	103
MCYYCFDSLFLCC	129
MCQQWNLYTRHWHVC	89
MCLFDLFLPYVFC	93
MCHSCFSHLFFCC	118
MCSYCFDSLFLCC	260
MCHYCFSALFYCC	128
MCCSCFDHLFYCC	159
MCHYCLNKLFLCCGC	159
MCFFCFDRFFLCC	127
MCTFDIFLPFIFC	85
MCFYCFRRLFICC	130
MCTFDLFLPFIIC	96
MCFFCFRRIFLCC	133
MCFFCFDRLFLFC	122
MCSYCFIKLFLCC	149
MCVYCFNFNFLCC	107
MCHPTRLHLWLCCNCGSGC	84
MCLFDSFLPFIIC	86
MCSYCYNKLFLCC	136
MCVFDLHCPFIFC	97
MCFSCFNKLFLCC	128
MCFYCFDSLLLCC	118
MCYFCFSHLFFCC	107
MCTFDTFLPFIYC	83
MCHYCFRGTFLCC	127
MCVFDLFLPFIYC	77
MCFSCFCRTFYCC	108
MCVFDSFLPFIPC	117
MCHYCFNKVFLCC	108
MCFFWFDRLFLCC	108
MCHPTRLHLWLCWNC	79
MCIFDLFCPFIIC	107
MCEYRLTRYHAWRIC	77
MCDQRLSPYTPWFPC	78
MCHFRPNKLTAWLPC	73
MCLYDSFLPFIYC	65
MCHYCLNKLLLCC	102
MCNKHLYYYLLFKHC	63
MCFKCFNDLYYCC	82
MCFYCFCRMFYCC	115
MCSMRGPNQYKWIPC	87
MCIFDNWLPFICC	75
MCFSCFDSLFLCC	88
MCHFCFSKLFLCC	110
MCYSCFSHMFFCC	115
MCLFDPFLSFIPC	106
MCLFDVFCDFIFC	100
MCHYCFYNLFLCC	97
MCIPCFKRLFLCC	127
MCFYCLDSLFLCC	125
MCHFRPNKFTAWLLC	73
MCLYDSFLPFIIC	62
MCYFCFSKLFICC	83
MCFYCFDSLFPCC	105
MCHPTRLLLWLCCNC	74
MCTFDTFLPFIIC	61
MCHHTRLHLWLCCNC	89
MCYYCFNRLFLCC	103
MCHPTRLHLWLYCNC	82
MCHYCFDATFLCC	86
MCITTLGALMSGFLC	68
MCHYCFHHLFLCC	97
MCSYCFNMLFLCC	146
MCLSCFCRMFYCC	90
MCSYCFNKHFLCC	117
MCYFRPNKFTAWLPC	59
MCFYCFDSLSLCC	98
MCLFDIFCPFIIC	59
MCHPTRLHMWLCCNC	75
MCHYCFYKLFLCCGC	90
MCHYCFKHLFLCC	112
MCCYCFSRLFLCC	88
MCFFCFDRLFRCC	83
MCSYCFNKRFLCC	109
MCHPTRLHLWLCCIC	66
MCHPTRIHLWLCCNC	66
MCRYCFNRLFLCC	86
MCSYCFNKLFMCC	94
MCSFCFRRMFLCC	128
MCFFCFDRLFLYC	94
MCIPCFNKLFLCC	97
MCHPTRLHLWLCC	55
MCSYCFTKLFLCC	117
MCTFDTFLPFILC	97
MCHFCFNKLFFCC	79
MCYSCFPHLFFCC	91
MCFYCFDSLFLCCGC	98
MCSYCFNKIFLCC	117
MCFYCFNCLFLCC	87
MCYSCFSALFLCC	107
MCFYCFDPLFLCC	86
MCFFCFERLFLCC	195
MCYFCFRHLFLCC	92
MCFICFDRLFLCC	96
MCSYFFNKLFLCC	95
MCCYCFNKLFLCC	85
MCHTTRLHLWLCCNC	66
MCYPCFSHLFFCC	99
MCHYCFNKFFLCCGC	86
MCIFDLFCPFIFC	79
MCDILIYHYWLPC	84
MCYYCFEFTFLCC	81
MCIFDNWLPFIPC	66
MCFSCFSGLFLCC	79
MCFSCFCRMFLCC	88
MCFFCFDRHFLCC	92
MCVFDLFLPFIIC	58
MCFYRFDSLFLCC	91
MCIFELFFPFIPC	88
MCLFDTFLPFIYC	60
MCFSCFCRMFFCC	66
MCFFCFARLFLCC	76
MCYSCSSHLFFCC	85
MCFYCFDSLFLC	47
MCLYDSFLPFILC	68
MCFYCFNRLFLCC	151
MCSYGFNKLFLCC	109
MCHPTRLHLWICCNC	56
MCVFDIFIPFVFC	47
MCLFDIFCPFIPC	61
MCFYCFRGTFICC	63
MCLFDLFFPFIIC	67
MCHYCFNKLFLPC	60
MCHYCFNKLFYCC	74
MCHYCFNRPFLCC	73
MCFSCLCRMFYCC	87
MCHPTRLHLGLCCNC	58
MCFYCFDYLFLCC	80
MCHDFTFVFTLAQC	46
MCFSCSCRMFYCC	64
MCLFDTFLPFILC	71
MCLFDLYCDFIFC	76
MCFHCFSNLFLCC	84
MCVYCFSMTFLCC	70
MCSYCINKLFLCC	101
MCHYCLNKLFLGC	45
MCIFDTFLPFIPC	55
MCSYCFNKLILCC	71
MCHYCFCRMFYCC	75
MCHYRFNKFFLCC	84
MCHPPRLHLWLCCNC	70
MCDTWTLYQRLWTPC	44
MCVYDLFLPFICC	60
MCFPCFCRMFYCC	74
MCYSCFSHLFFCCGC	73
MCSYCFHKLFLCC	91
MCYSCFYHLFYCC	72
MCVFDIHMPFIPC	67
MCSSCFCRMFYCC	62
MCFYCFDSLFFCC	67
MCHYCFNKLFLCCC	75
MCIFDLFAPFIFC	52
MCYSCFSHLLFCC	79
MCHYCFNRLFLCCGC	80
MCHHCFNKLFLCCGC	66
MCSTRYFKWQPWTPC	57
MCFYCFDSSFLCC	61
MCLYDSFLPFIPC	57
MCYSCFCHLFYCC	54
MCFFCFDRLFLWC	42
MCVFDLFLPFILC	56
MCSYCFNKLVLCC	82
MCHYCFNKLFFCCGC	52
MCYSCLSHLFFCC	101
MCLPTRLHLWLCCNC	40
MCHHCFNRLFLCC	70
MCTFDLFLPFILC	109
MCLFDTFLPFIIC	65
MCFSCFCRMFHCC	54
MCYSCFSHSFFCC	74
MCYYNINSGVIVYC	39
MCHFCFDKLFLCC	62
MCFYCSDSLFLCC	61
MCFFDIHMPFIPC	64
MCTFDLFIPFVLC	49
MCSYCFNKLFVCC	56
MCVYDLFLPFIPC	58
MCVFDSWLPFVFC	47
MCLYCFNKLFLFC	60
MCIFDIFMPFIIC	38
MCQRYTKFHAYFC	38
MCVYDIFVPFILC	47
MCETWYYFEITKHFC	48
MCFSCFCRMLYCC	89
MCIYCFDSLFLCC	66
MCHYCLKKLFLCC	63
MCIFDLFLPFVLC	37
MCHYCFSRLYICC	48
MCYDLLGPAFTYC	37
MCFSCFSRMFYCC	69
MCYYCFNKLFICC	56
MCLFDTFVPFIYC	37
MCHYCFNKLFIYC	50
MCHYCFKKLCLCC	52
MCHFCLNKLFLCC	59
MCHYCFNRLLLCC	87
MCHYWCNKLFLCC	64
MCFFDLFCPFIVC	36
MCFYDLFLPFIYC	36
MCHTWNWWNRTWYEC	36
MCFFCFDRLYLCC	51
MCRGFYDAFWYC	36
MCSYCFNCLFICC	103
MCQQWNLYTRHWHPC	53
MCFSCFDHLFLCC	56
MCFFYFDRLFLCC	52
MCFSCFCRMFYC	36
MCYSCFSKLFYCC	63
MCHPTRLHLWLCSNC	36
MCYSCFSHLFFC	35
MCVFDSFLPFIMC	35
MCLYCFNRLFLCC	64
MCIFDTHMPFIPC	35
MCQQWNLYTRHWHAC	49
MCHYCFNKLFLVC	44
MCVFDSFLPFIVC	44
MCHYCFNKLFLCCSC	35
MCVFTIFPFPFIPC	35
MCRFYEIFWSFPC	59
MCSYCFDRLFLCC	69
MCTFDTFLPFIPC	52
MCYSRFSHLFFCC	51
MCHPTRLHLWLCCTC	43
MCCSCFDRLFLCC	75
MCHPTRLPLWLCCNC	45
MCHPTRLHLWLFCNC	50
MCHYCFNKLFLCFGC	45
MCLFDSFVPFIYC	35
MCIFDLFVPFIIC	35
MCFSCFCRLFYCC	65
MCFFCFDRLFQCC	58
MCFFCFSNLFLCC	60
MCHPTRLHLWLSCNC	43
MCHYCFNKLFLCCDC	34
MCSYSFNKLFLCC	55
MCEMRSTVFTRWQPC	56
MCWSCFDRLFYCC	54
MCVYCFNKLFLCC	56
MCFHIKANYGFVRVC	34
MCLYCFYKLFLCC	61
MCHFCFNRLFLCC	55
MCHYCFNRLSLCC	64
MCYSCFSRLFFCC	66
MCHYCFNNLFLCCGC	97
MCHPTRLHLWLCCHC	43
MCIFDLFCPFIMC	33
MCFFCFDRLCLCC	61
MCHYCFYKLFFCC	50
MCTFDSLLPFIFC	33
MCSYCFNKLFFCC	54
MCSKCFNKLFLCC	87
MCIFDLFVPFIYC	46
MCFYCFNSLFLCC	57
MCHYCFNKLFLCRGC	62
MCYFCFDFLFLCC	93
MCLFDTMLPFIYC	42
MCDHWYKWMFTVHAC	44
MCHYCLYKLFLCC	66
MCTFDIFLPFIPC	42
MCLYCFSNLFLCC	49
MCFYCFSRLFLCC	55
MCYYCFHHLFLCC	59
MCHYCFNKLFQCC	49
MCHYCFNRLFPCC	57
MCHYCFNNFFLCC	46
MCYFCFHHQFLCC	51
MCTTWYTFSLTSAPC	32
MCLFDTFYFFIPC	32
MCLFDLFCPFIYC	32
MCLYCFDALFICC	46
MCLYCFNNLFLCC	51
MCLYCFDKLFLCC	69
MCFFCCDRLFLCC	47
MCHYCFNRLFLC	31
MCVFDVFCPFIIC	40
MCYSCFDRLFLCC	51
MCLFDTFVPFIIC	31
MCCPCFDRLFYCC	45
MCIFDSFLPFVFC	42
MCHYCLNRLFLCC	77
MCFYCFDSFFLCC	52
MCHFCFDFLFICC	42
MCYSCFSGLFYCC	61
MCHYRFYKLFLCC	45
MCHYCFNSLFLCC	52
MCHYCFYKFFLCC	46
MCFCCFDRLFLCC	50
MCHYRFNRLFLCC	48
MCFYCFSNLLLCC	43
MCPRYVLYYKLFHHC	30
MCTDLYYYLIWQRYC	30
MCHYCLNKLCLCC	49
MCVFDLFVPYIVC	45
MCHYCFNKLFIFC	53
MCFYCFDSLFLYC	42
MCHSRPNKFTAWLPC	30
MCFYCFDSLFLFC	52
MCFFDLHLPFVFC	46
MCFSCFSRLFTCC	30
MCYFCFHHLLLCC	53
MCPPTRLHLWLCCNC	29
MCCPCFSHLFLCC	43
MCHPTRLHLWLCCYC	29
MCCSCFSHLFFCC	50
MCCFDSFLPFIYC	51
MCSKCFDDLYYCC	43
MCHYCFIKLFLCCGC	43
MCHPTRLHLWLCCKC	47
MCMFDLFCPFVIC	39
MCHYCFNKLFCCC	44
MCYSCFDHLFYCC	40
MCYSCFSAPFYCC	47
MCFYCFDSMFLCC	29
MCHYCFDKLFICC	40
MCLFCFNKLFLCC	39
MCFCCFDSLFLCC	49
MCPYDSIFWWPNTC	38
MCFSRFCRMFYCC	43
MCRYCFSRLYLCC	47
MCTFDTFLPFICC	28
MCLFDTFLPFIPC	28
MCVYCFDSLFLCC	44
MCIFDIHMPFTPC	52
MCHYCFNNLFLFC	49
MCHYRFNKLFLWC	28
MCYYCFDKLFLCC	47
MCYFCSHHLFLCC	50
MCHFRPNKFAAWLPC	28
MCFYCFRRTFLCC	47
MCIFDNWLPFILC	38
MCIFDLFCPFILC	72
MCCFDSFLPFIIC	47
MCHSCFWRTFFCC	43
MCYFCLHHLFLCC	47
MCIFDLFVPFILC	38
MCFSCFSHLYFCC	53
MCEMRQSSFLPWTSC	38
MCHYCFSRLYPCC	47
MCIPCFRHLFLCC	51
MCEYRLASWMPWLPC	27
MCFFCVDRLFLCC	47
MCFFCFNCLFICC	41
MCVYCFCDHFLCC	45
MCTFDSWLPYILC	27
MCHHCFNKLFICC	26
MCFYCFVSLFLCC	41
MCHYCLNNLFLCC	41
MCFSCFDRLFYCC	36
MCVFCFDRLFLCC	42
MCYFDPHFIFILC	36
MCKSCFHALFFCC	37
MCHFRPNKFSAWLPC	26
MCIFDTFLPFICC	26
MCDTKSTRFHPWVTC	26
MCDVLIYHYWIPC	43
MCDPTRLHLWLCCNC	36
MCVYDIFVPFIPC	36
MCDFKGKYDRTWTPC	51
MCHFRPNKFTAWPPC	26
MCFFCFDATFLCC	44
MCTFDTHLPFIFC	26
MCFYCFDSLFLRC	51
MCFFCFDKLFLCC	46
MCHYCSNKLFLCCGC	41
MCHFCFDRLFLCC	45
MCHFWFNKLFLCC	26
MCYSCFSHLSFCC	49
MCFYWFDSLFLCC	42
MCNYCFNKFFLCC	39
MCFYCFDSLYLCC	37
MCQQWNLYTRHWHDC	25
MCFNCFDSLFLCC	41
MCHPTRLNLWLCCNC	25
MCFYDLFLPFIIC	25
MCYVQYYRIYRSRGC	25
MCKRHLFYWQLVHKC	25
MCHYCFKRLFLCC	57
MCFYCFASLFLCC	45
MCPFCFNKLFLCC	35
MCYFCFSKPFLCC	39
MCFFCFRGTFLCC	43
MCIFDNWLPFIIC	39
MCHYWFNKLFLCCGC	50
MCLFDIFLPFIPC	50
MCFSCFQRLFYCC	42
MCEREFLYSYLLQFC	25
MCFYCFDTLFLCC	42
MCHYCFNRLFLFC	44
MCYFCFHHLFPCC	40
MCNYCFYKLFLCC	40
MCLFDLFCPFIIC	24
MCLFDLFCPFILC	38
MCTFDIFLPFIIC	24
MCHYGFYKLFLCC	37
MCYYCFSHLFFCC	42
MCYLCFHHLFLCC	42
MCRYCFNKLFICC	24
MCFFCFDRLFLSC	33
MCVYCFNSLFLCC	24
MCCFDSFLPFILC	70
MCRYCFSKLFLCC	46
MCFSCFSALFYCC	77
MCHFRPNKFTAWIPC	34
MCYFCFSKLFLCCGC	41
MCYNVHWYRWIRRRC	24
MCDTNFNRWGLWWIC	24
MCLFDTFVPFILC	41
MCHYCFNKLFLCCAC	35
MCYYCFYKLFLCC	45
MCSYCFNQLFLCC	46
MCHYCFNRFFLCC	40
MCLYCFTKLFLCC	47
MCDTWTLYQRVWTPC	24
MCRFCFNKLFLCC	36
MCRYCFNKLFFCC	34
MCYFCFQHLFLCC	66
MCHYCFIKLFLFC	39
MCHLCFNKLFLCC	46
MCIFDIHMPFIFC	34
MCLFDSFVPFIIC	23
MCHPSRLHLWLCCNC	44
MCETWYYFEITKHPC	23
MCHYCFPRLYLCC	42
MCYYCFNKLLLCC	33
MCYSCFSRLYLCC	46
MCFYCFDCLFICC	40
MCHYCFNFNFLCC	36
MCYSCFSHLFSCC	35
MCHFRPNKFTVWLPC	23
MCHYRLNKLFLCC	60
MCWSCFKSLFLCC	23
MCYYCFNNLFLCC	31
MCIPCFKHLFICC	33
MCYNKFITLYKVLYC	23
MCHYCCNKLFLCCGC	35
MCFSCFCRMFYCCGC	40
MCHYCFSKLFICC	23
MCHYCFSRMYLCC	34
MCHFRPNKYTAWLPC	22
MCFSWFCRMFYCC	31
MCLFDLFLPFIMC	22
MCFFDTFLPFIFC	57
MCVFDVFCPFIYC	22
MCCFDIFLPFIYC	22
MCFYDSFLPFIFC	22
MCEQRWPHSLLWFPC	22
MCHYCFNKLFLCCCC	36
MCYYCFNKLFLCCGC	39
MCHFRPNKFTARLPC	22
MCHYCSNRLFLCC	40
MCHHCLNKLFLCC	35
MCLYCFNHSFICC	41
MCFYCSSNLFLCC	32
MCIFDIHMPLIPC	22
MCTFDNWLPFIYC	22
MCVFDSFLPFIYC	22
MCFFDSFMPFIFC	22
MCFYCFESLFLCC	22
MCSYCFSNLFLCC	72
MCVFDLWLPFYFC	31
MCHYCFNKLFMCC	43
MCHYCFNKLFRCCGC	22
MCVYDLFLPFIIC	22
MCFYGFDSLFLCC	31
MCYFCFSALFYCC	39
MCNDLFYYLLWRKAC	22
MCFHCFRGTFLCC	45
MCFVCFDRLFLCC	40
MCHYCFNKLFHCCGC	22
MCHYCFKKLFLGC	22
MCHYCFYKLFLFC	41
MCHYCFNKFYLCC	40
MCDIVIYKILRSLC	21
MCKRHILYWKLWHVC	21
MCHYCFNRLFLRC	32
MCYSWFSHLFFCC	31
MCFFCFDRLFVCC	32
MCHHWFNKLFLCC	32
MCFYYFDSLFLCC	30
MCHFRPSKFTAWLPC	21
MCVYCFDALFLCC	35
MCLFDHFLPFVYC	30
MCIFELNLPFIPC	34
MCFYCFGSLFLCC	40
MCVYDIFVPFIMC	21
MCFFDLFCPFIFC	32
MCHFRPNKFTSWLPC	21
MCVFDLFCPFIVC	21
MCYEPWPSFIWIC	21
MCFFCFDRLFYCC	21
MCFSCFCRMSYCC	37
MCTFDLFLPFIPC	50
MCYSCFSHLFFRC	39
MCHPTRLHLWLCFNC	32
MCISCFCRMFYCC	40
MCFFCYDRLFLCC	35
MCLFDLFVPFIFC	32
MCFSCFCRMFYRC	32
MCFFCFDRLFMCC	36
MCYYCFSNLFLCC	42
MCTFGMNQGFYWLLC	30
MCYFCFHHLSLCC	40
MCCYCFDSLFLCC	36
MCFYCFSNLFLCCGC	36
MCIFDSFCPFIVC	20
MCYFCFHHLFLCCGC	34
MCHPTRLHLWVCCNC	30
MCLFDLFFPFIPC	78
MCFYCFSNLFLC	20
MCLYCFDRLFLCC	38
MCSYCFNTLFLCC	40
MCYSCFSALFFCC	30
MCIFDTHFPFILC	20
MCYEVLWYKLQRKHC	20
MCHFCFNKLFLCCGC	38
MCRGFYDAFWCC	20
MCHYCLNKFFLCC	59
MCHYCFNKLYLCCGC	29
MCHYCFNKFCLCC	38
MCFYCFDSLFLGC	20
MCITTLAQVIKAMLC	20
MCFFCLYDSYLCC	34
MCNIILYKIMKNRC	20
MCVFDLFLPFIPC	20
MCHYCPNKLFLCC	34
MCHYCFNKLCLGC	20
MCLYCFRGTFLCC	39
MCHSCFSALFYCC	39
MCFYCFSHLFFCC	32
MCYFCFHHLFLC	20
MCISCFKHLFLCC	38
MCDTKPPYSKHWTPC	32
MCCFDIFLPFIIC	20
MCDTWTLYQRFWMPC	20
MCFFDPHLPFIFC	30
MCIPTRLHLWLCCNC	20
MCFFCFNRLFICC	20
MCFYCFNSLFICC	33
MCTFDLFIPFVFC	20
MCHFCFNNLFLCC	19
MCKKRTLYYFLLHRC	19
MCHYCHNKLFLCC	32
MCTFDLFLPFICC	32
MCFYCFDSLFLWC	19
MCCFDSFLPFIPC	30
MCHYCFNKLLLCCGC	60
MCHLRPNKFTAWLPC	19
MCFSCFCRMFYYC	29
MCYFRFHHLFLCC	19
MCYSCFTHLFFCC	35
MCQYCCNKLFLCC	19
MCHYCSSRLYLCC	34
MCHYWFNNLFLCC	29
MCFYDLFLPFILC	28
MCFFCFDFLFLCC	28
MCTPCFKHLFLCC	32
MCHYCFSRLYLC	19
MCSYCFNKLFLCCGSGC	37
MCFSCFWRMFYCC	29
MCTYTMDYNTMEVWC	19
MCHYCFNKLFICCGC	19
MCFPCFKHLFLCC	38
MCFYRFSNLFLCC	34
MCHYCFSRSYLCC	29
MCTFDVFLPFIIC	19
MCYSCFSYLFFCC	19
MCFYDLFLPFIPC	19
MCFFGFDRLFLCC	18
MCRYCFNKLFLCCGC	18
MCHYCFYRLFLCC	34
MCSYCFNKLFHCC	30
MCKYSKDLWLYRLWC	18
MCHYCFNRLFFCC	34
MCHYCFDKPFLCC	26
MCHFCFNKLFICC	18
MCHYCFHNLFLCC	18
MCHNCFNKLFLCCGC	33
MCYYCLNKLFLCC	28
MCSYCFDALFLCC	26
MCSYCFNRLFICC	29
MCLYCFDALFPCC	18
MCHYWFNRLFLCC	33
MCSYCFRGTFLCC	45
MCHFCSNKLFLCC	34
MCYFCLSKLFLCC	43
MCDTWTLYQRFWAPC	31
MCHPNRLHLWLCCNC	18
MCFSFVYTLSQLC	18
MCVFDVFCPFILC	29
MCFSCFCCMFYCC	33
MCCFCFHHLFLCC	28
MCEYWSIYTPRWQFC	29
MCHYRFNKLFLFC	32
MCIFDLFFPFVPC	18
MCQWFVWEFSHPTNC	18
MCIFDLFLPFIFC	18
MCFYCFSNLFPCC	30
MCFSCFCRMFYFC	18
MCVFDLFLPFICC	18
MCHPTPLHLWLCCNC	18
MCYFCFSKLFLRC	18
MCLFDLFCPFIPC	18
MCYFCFSKLLLCC	18
MCELLYFYFWMPC	30
MCDTWTLYQRFWTQC	17
MCHYRFNKLFLCCGC	17
MCHYCVNKLFLCCGC	34
MCHYCYNKLFLCCGC	34
MCHDYIVFYKVLRHC	17
MCYKNVKNGLFVYC	17
MCTFSWPMSYPFIPC	28
MCHYCLHKLFLCC	28
MCFFCFSHLFFCC	17
MCHYWFNKLFRCC	17
MCHYCFIRLFLCC	17
MCCSCFNKLFLCC	31
MCHYCLNKLFLFC	52
MCHATRLHLWLCCNC	17
MCNYCFNNLFLCC	26
MCHYCCNKLFRCC	17
MCFFDNWLPFIYC	17
MCRYCFNKPFLCC	30
MCHYCFNKLLLGC	17
MCFYCFYRLFLCC	26
MCKRFITYWKLFHKC	17
MCYDLLGPAFTCC	17
MCFYCFSNLSLCC	28
MCHYCFNKLFLCCRC	30
MCHYGLNKLFLCC	35
MCHHCFNKLFFCC	17
MCFYCFDSLCLCC	28
MCFFCIDRLFLCC	31
MCYFCFYHLFLCC	26
MCLYCFDATFLCC	17
MCDTWTLYQRFWTLC	17
MCTFDTHFPFIIC	17
MCWSCFKSLFYCC	17
MCFYCFSNSFLCC	28
MCLFDIFLPFIYC	17
MCLFDIFLPFILC	31
MCHYRFTKLFLCC	27
MCDVYYSPLHLWLPC	30
MCHYCFSRLYLCCGC	31
MCLFDLFYPFIFC	16
MCYFWFHHLFLCC	25
MCLYCFNRLFICC	25
MCHYCFSKLFRCC	16
MCLYRFNKLFLCC	16
MCYLCFSKLFLCC	32
MCYFCFHYLFLCC	16
MCFYCLSNLFLCC	28
MCFYCFSRLYLCC	29
MCPYCLNKLFLCC	25
MCHYWSNKLFLCC	29
MCFYCFDSLFRCC	16
MCRHCFNKLFLCC	16
MCHYCFKKLLLCC	26
MCYSCFSNLFLCC	26
MCNYCFNKLFLCCGC	25
MCFYCFPNLFLCC	16
MCHYYFYKLFLCC	16
MCHHCFDKLFLCC	16
MCEYHNWFEYKYRYC	16
MCHYWLNKLFLCC	55
MCTFCFSRTFICC	32
MCLYCFNCLFICC	30
MCDTWALYQRFWTPC	16
MCHTWDWWNRTWYEC	16
MCYSCFSALFHCC	25
MCIPCFKHPFLCC	28
MCYEPWPSFIWTC	25
MCFYCFSNFFLCC	16
MCEQRLPRSLLWFPC	16
MCVFDLFLPFTYC	16
MCHTRINYLWPWRPC	16
MCHYCFHKLFLCCGC	16
MCYFCFSKLSLCC	27
MCIFDLFVPFIPC	16
MCFTCFCRMFYCC	29
MCLYDSLLPFIFC	16
MCVYDLFLPFILC	15
MCHFRPNKFTAWFPC	15
MCQFDTFIFPFIPC	15
MCYFCFHHLFLRC	28
MCYSCFSALFYC	15
MCLYDSFLPFICC	15
MCDTWTLYQRSWTPC	15
MCHFRPNKSTAWLPC	15
MCVFDSFLPLIIC	15
MCYFCFPKLFLCC	28
MCFYCFSDLFLCC	15
MCIPCLKHLFLCC	15
MCLFDTFLPFICC	15
MCIFDVHMPFIPC	15
MCFYCFSNLFLFC	23
MCIFDSFLPFIFC	26
MCYFCFSKLFPCC	29
MCYSCFSHFFFCC	15
MCYYCFDFLFLCC	15
MCIPCFKHLFLC	15
MCHFRSNKFTAWLPC	15
MCIPCFKQLFLCC	25
MCLPCFKHLFLCC	25
MCFSCFSRLFLCC	15
MCNYRFNKLFLCC	25
MCKRAVLYYLIHRHC	15
MCHYSWNIYQHVWQC	15
MCHYCFNKLLPCC	24
MCYSCFDSLFLCC	25
MCYHCFNKLFLCC	25
MCHYCFNALFLCC	24
MCHFCFDLLFLCC	15
MCHYGCNKLFLCC	27
MCLYCFNKLFICC	15
MCHYGFNNLFLCC	15
MCHHCFNNLFLCC	28
MCYSCFSALFYCCGC	28
MCHFRPNKVTAWLPC	15
MCHSCFNNLFLCC	29
MCHHCFNKLFPCC	15
MCHYRFNNLFLCC	26
MCIYRLSDFWVVC	15
MCHYCFYKLFLRC	15
MCIFDIHMPFISC	15
MCHYCFDRLFYCC	15
MCFFCFDALFLCC	15
MCLYCLNKLFLCC	39
MCHYWFYKLFLCC	15
MCHHCFNKFFLCC	24
MCPYCFNRLFLCC	35
MCHQCFNKLFLCC	15
MCHYCFNKLFPCCGC	15
MCHYDSFLPFIFC	15
MCHYCFNKLFLCCVC	25
MCFYCFAGLFFCC	15
MCVWPKWLTKFILRC	15
MCFDVNMVTGHVTMC	14
MCYSCLSALFYCC	25
MCHYCLIKLFLCC	25
MCNWPLYYYRIYKHC	14
MCRYCFNKLLLCC	14
MCHRCFNKLFLCC	14
MCYKDLYYYLLVHKC	14
MCHCWFNKLFLCC	28
MCCSCFDRLLYCC	14
MCHYCLTKLFLCC	25
MCLFDSFVPFIPC	14
MCVFDNWLPFIYC	14
MCHYCFSRVYLCC	14
MCKEILYYKIWKRWC	14
MCAFDSFLPFIIC	14
MCHYCFTKLFLFC	28
MCPYCFNNLFLCC	22
MCIYCFDALFLCC	14
MCSYWSLASPIWQPC	24
MCHYCFNNLFFCC	24
MCHYCFIKLFFCC	14
MCFSCFAGLFICC	14
MCHYGFNKLFLCCGC	26
MCHPTRLHVWRCCNC	14
MCKRYIRYWQLYHHC	14
MCYYCSNKLFLCC	25
MCYFCFHQLFLCC	23
MCYFCFHHLYLCC	14
MCCYCFSALFLCC	14
MCSYCLNKLFLGC	14
MCKIWYIEHQFYWVC	14
MCFSCFRGTFLCC	14
MCFHCFDATFLCC	14
MCHFRPNKFTTWLPC	14
MCHYWFNKLFFCC	14
MCLFDTFVPFICC	14
MCHYCFNGLFLCC	14
MCLYCFNKLFLGC	14
MCSKCFNNLYYCC	14
MCCFDSFLPFICC	14
MCYSCFSHLFFYC	23
MCQQWNLYTRHWHLC	14
MCHYCFSHLYLCC	14
MCYFCSSKLFLCC	26
MCHYCFSRLHLCC	25
MCHYCFSRLYLFC	14
MCHYRFNKLFVCC	14
MCLYCFDALFLCCGC	14
MCYFCFSKLFLFC	27
MCYYCFNKPFLCC	28
MCFFDTFVPFIFC	14
MCHFRPNKFTACLPC	14
MCLFDLFVPFVLC	14
MCVYDIFVPFIVC	14
MCITTLGMLYKRIAC	14
MCRYCFDKLFLCC	23
MCIPCFKHLFPCC	27
MCFSCFSGLFYCC	25
MCWWFRNHKFWQQIC	14
MCHYCLNKLFLWC	14
MCRYRFNKLFLCC	14
MCHYGINKLFLCC	14
MCPYCFNKLFLRC	14
MCYFCFNHLFLCC	26
MCYFCFHKLFLCC	14
MCHYRPNKFTAWLPC	14
MCLFDTFLPLIFC	13
MCEYWSIYTPRWQSC	13
MCHYCFKKLFLFC	13
MCHYWFNKLFICC	13
MCHICFNKLFLCC	23
MCRGFYDAFWLC	13
MCHHCFNKLFLRC	13
MCSSCFSHLFFCC	26
MCNRHLVYYKLWHQC	13
MCYPCFSALFYCC	25
MCKHLFYYKLIRKAC	13
MCIPCFKHLSLCC	22
MCYSCFNRLFLCC	23
MCSYCFDATFLCC	31
MCHFCFNMLFLCC	13
MCRYCFNKLSLCC	22
MCHHCFSRLYLCC	13
MCGRHVLYYRILRSC	13
MCHYCLSRLYLCC	13
MCLYCFSRLYLCC	13
MCHYCFSCLYLCC	13
MCPKYVLFYKIFKHC	13
MCPDFSFVFTLFQC	13
MCHYCFNKFLLCC	13
MCIFDLFCPLIVC	13
MCHYCFKNLFLCC	25
MCFYRFNCLFICC	13
MCYYCFNCLFICC	24
MCFFDIFMPFILC	13
MCQYWFNKLFLCC	13
MCFFCFYRLFLCCGC	23
MCCYELLWDFISVSC	13
MCIPRFKHLFLCC	13
MCHFRPNKFTALLPC	13
MCNSCFSHLFFCC	13
MCVFDVFCPFICC	23
MCSYCFSRLYLCC	13
MCFYCFYATFLCC	22
MCYSCFSHLFFFC	13
MCLKYVQFYRALHKC	13
MCYSCFAHLFFCC	22
MCVYDIFVPFIYC	13
MCYLCFSRLFYCC	22
MCFHCFNCLFICC	23
MCLYDNLLPFILC	13
MCVFDSFLPFITC	13
MCYFCFLHLFLCC	22
MCLFDLFVPFVYC	13
MCHHCFYKLFLCC	22
MCDTWSLYQRFWTPC	13
MCHYCRNKLFLCC	22
MCFYCFSRSFLCC	13
MCQYGFNKLFLCC	13
MCIFDLFSPFIYC	13
MCVFEIIGPFYTC	13
MCHYCCNNLFLCC	13
MCCFCFSKLFLCC	13
MCTFDLFLPFTFC	13
MCHYCFNMLFLFC	13
MCFFCFDRRFLCC	24
MCHYCFNNLFLGC	13
MCHYCVIKLFLCC	12
MCYFCFHHLFRCC	12
MCPYCFNKLFLCCGC	23
MCHYWFNKLLLCC	12
MCYYCFNKLFFCC	12
MCFSCFGRMFYCC	12
MCFFCFDLLFLCC	22
MCHCCFNRLFLCC	12
MCVYCFSNLFLCC	12
MCFSCFSRLFICC	12
MCCFCFDRLFLCC	12
MCTFDIHMPFIPC	22
MCRSCFNKLFLCC	22
MCHFCFYKLFLCC	12
MCHYCFFKLFLCC	12
MCHYGFIKLFLCC	12
MCHYCFYKLFHCC	12
MCLFDLFVPFVCC	12
MCHYCGNKLFLCC	12
MCREVFYYQLIHRLC	12
MCFFCFDRLVLCC	12
MCFYCFSNLFFCC	23
MCDYAAVIWYKLSYC	12
MCRPIRLHLWLCCNC	12
MCIPCFEHLFLCC	12
MCFSCFSNLFLCC	22
MCLFDSFVPFICC	12
MCPKCFNDLYYCC	12
MCLFDTFVPFIPC	12
MCYYCFDRLFLCC	12
MCFFCFHRLFLCC	12
MCHRTRLHLWLCCNC	12
MCFYCFSSLFLCC	12
MCQQWNLYTRHWRIC	12
MCLFDSFVPFILC	12
MCHYCFSKLFFCC	22
MCFYCFSNMFLCC	12
MCHRHLVYYLHHLRC	12
MCSYCFCRMFYCC	12
MCYSCCSHLFFCC	22
MCHFCFYFLFLCC	12
MCYFRFSKLFLCC	24
MCFFCFDRLFLCCGSGC	12
MCYFCFHNLFLCC	22
MCFYCFRGTLLCC	12
MCHYCFNKLFLFCGC	12
MCSYCFNKVFLCC	12
MCDHKRHLVYYLLFC	12
MCNYCFNRLFLCC	23
MCHSCFNKLFLCCGC	21
MCNYCFNKLFICC	12
MCHYCFTNLFLCC	12
MCFKRDLLYWKLIQC	12
MCYKRDLFYYLLSIC	12
MCSSCFDRLFYCC	12
MCLYCFDALLLCC	23
MCHYRFNKLFICC	12
MCHYRFSRLYLCC	21
MCYFCFSKLFLC	12
MCHYCFYKLLLCC	21
MCHYCLNKPFLCC	12
MCDVLIYHYWPPC	12
MCHYCLNKLFICC	21
MCYTELWYKYIRRHC	12
MCIFDLFLPFVFC	22
MCVYCFNYLFLCC	12
MCFYCFNCPFICC	24
MCISCFQRLFLCC	21
MCHYCFSRFYLCC	22
MCHYCFNKFFLWC	12
MCIPCFQRLFYCC	12
MCLYCFGALFLCC	21
MCIFDSFFPFILC	12
MCIFDIHMLFIPC	12
MCYSCFKHLFLCC	22
MCFSCFAGLYFCC	22
MCHYCSIKLFLCC	12
MCYSCFAGLFFCC	21
MCYSCFYHLFFCC	12
MCHYCWNKLFLCC	12
MCHYGVNKLFLCC	23
MCHYCFKKFFLCC	21
MCHPCFNKLFLCC	12
MCLYCFDAMFLCC	12
MCEFDSFLPFIIC	12
MCCSCFCRMFYCC	23
MCHYCFNRLFLYC	12
MCHYCFNKPFLCCGC	12
MCHYCSNKLFICC	22
MCLYCFDAFFLCC	12
MCHYCFSRLYLYC	12
MCHYCSNKLFPCC	12
MCHYCFNKPFICC	12
MCTYCFYKLFLCC	12
MCHHCFIKLFLCC	11
MCHYCCNKLCLCC	11
MCIPCFKHLFLCCGC	22
MCHYCFKKLFLWC	11
MCHYCFNKLFWCC	11
MCYFCFTKLFLCC	20
MCSYCLNKLFLCCGC	11
MCHYCFNKFFLFC	21
MCHYGFNKLFLFC	22
MCSKCFNGLYYCC	11
MCHYGFNKLFRCC	11
MCHFCFDFLLLCC	11
MCDTWTLYQRFWKPC	11
MCHYCFIKFFLCC	20
MCYFCFYKLFLCC	11
MCHYCCKKLFLCC	11
MCSYCFNKFYLCC	11
MCHFCFNKLFLFC	11
MCHYCFDKLFLCCGC	11
MCRYCFNKLFRCC	20
MCYSCFSHLYFCC	11
MCYFCFCRMFYCC	21
MCFKDAFYSYRYYNC	11
MCFSCFCRKFYCC	11
MCYYCFNKLFPCC	21
MCVFDSLLPFIYC	11
MCLFDLHLPFIYC	11
MCDTWTLYQRFCTPC	11
MCHSCFDFLFLCC	11
MCFYCFNGLFICC	11
MCFYCFDATFLC	11
MCETWYYFEITKHIC	11
MCYSCFSALFYFC	20
MCFFDLSLPFVFC	11
MCFYCFRGTFPCC	22
MCIFDTFLPFIVC	11
MCFKQHLFYYLLQC	11
MCRDLFYFLLYKRHC	11
MCHYCFNRLYLCC	11
MCFSCFCRVFYCC	11
MCYFCFHHLFFCC	21
MCTFDLFLPFVFC	11
MCTFDVFLPFICC	11
MCFYCFNKPFLCC	20
MCHYRFNKLLLCC	21
MCYEILWFRYQRQKC	11
MCYFCFSKLFLYC	11
MCFYCSNCLFICC	22
MCFSCFCRMYYCC	11
MCIPCSKHLFLCC	22
MCLFDIHMPFIPC	21
MCFYCSRGTFLCC	21
MCFYCFDFLFLCC	20
MCHYCFGKLFLCC	11
MCHYFFNKLFLRC	11
MCHYCFNKHFLCCGC	22
MCYVLIYHYWLPC	11
MCHYCFNNLFLWC	11
MCVYDTFVPFIIC	11
MCTFDTHFPFIPC	11
MCFFCFCKAFLCC	20
MCVFDIFMPFILC	11
MCFYCFSNLYLCC	11
MCHFQPNKFTAWLPC	11
MCHTREPWNTRWRPC	21
MCDTWTLYRRFWTPC	11
MCITTLGALMSGFPC	11
MCIFDIHMPFIIC	11
MCLFDSFLPFIYC	11
MCHYCFTRLYLCC	11
MCHFRPNEFTAWLPC	11
MCYSCYSHLFFCC	11
MCFYCFDSLILCC	11
MCILDNWLPFIYC	11
MCYFCFSNLFLCC	11
MCHHCFKKLFLCC	11
MCFSCFYRMFYCC	22
MCSKCLNDLYYCC	11
MCHNCLNKLFLCC	20
MCTFDTFLPSIFC	11
MCYYCFRGTFLCC	11
MCSYCFNKLFWCC	11
MCRYWFNKLFLCC	11
MCHPTRLHLWLCCNCGC	11
MCFFFFDRLFLCC	11
MCFYCFNATFLCC	20
MCDVLIYHYLLPC	20
MCFDCFDSLFLCC	11
MCHYCFNKLFLCWGC	11
MCFYCLRGTFLCC	20
MCHYCFKKLFRCC	11
MCNIWFVDRKFIWVC	11
MCYCCFNKLFLCC	11
MCHYCFNKLFIRC	11
MCHSTWLHLWLCCNC	11
MCYYCCNKLFLCC	11
MCHYGFNKLFICC	11
MCYYCFNKLSLCC	21
MCLYWFDALFLCC	11
MCHSCLNKLFLCC	11
MCYFCFHHMFLCC	11
MCHYRASPHAPWIPC	10
MCLYCFSKLFLCC	10
MCYFCFHHLFLFC	20
MCYDLYYYKLVRRWC	10
MCHFCFDFLFPCC	10
MCVFDIFIPFILC	10
MCSYCFKHLFLCC	20
MCLYDSFLPFIFFC	10
MCHYCFNRHFLCC	10
MCILCFKHLFLCC	10
MCHYCFDFLFYCC	10
MCCSCFSALFYCC	20
MCHYCFNKLFLCYGC	19
MCLYCFKKLFLCC	10
MCHYCFNKRFLCCGC	10
MCHFRPNKFTAWLQC	10
MCFYCFNFNFLCC	10
MCIPCFNHLFLCC	10
MCIFDSFFPFIIC	10
MCQQWNLYTRYWHIC	10
MCHYCFNRLFLWC	10
MCSYCFNRLFPCC	10
MCHYCFNQLFLCCGC	20
MCYFCFHHPFLCC	20
MCPFTFVFTMLQC	10
MCLFDSFVPFVLC	10
MCYYCFKKLFLCC	10
MCPHCFNKLFLCC	10
MCHYCFTKFFLCC	18
MCFSCFCRMFDCC	10
MCYLCFSKQFYCC	10
MCASKHLLYWKIFHC	10
MCSYCFMRLFLCC	10
MCLYCFNKLLLCC	19
MCNYCINKLFLCC	10
MCHLFYYKLIHRKWC	10
MCFYCFRGTSLCC	19
MCHYCFNKPFLFC	10
MCHPTRLHFCLCCNC	10
MCPYCFDALFLCC	10
MCFSCICRMFYCC	10
MCVFDIFIPFVIC	10
MCWYCFSKLFLCC	10
MCIPWFKHLFLCC	10
MCHYCFNKLFTCC	10
MCYYCFNKLFLC	10
MCHFRPNKFTAWLPCGSGC	10
MCHYCFIMLFLCC	10
MCHFRPNKFTAWRPC	10
MCLYCFIKLFLCC	10
MCYSCFSALFYRC	19
MCHYCFNKLFLWCGC	10
MCFYCFNRLLICC	10
MCYSCFSHLFCCC	19
MCLFDLHLPFILC	10
MCLGFYDAFWFC	10
MCHYCFSRLYLRC	19
MCHYCFNRLFRCC	10
MCSLCFNKLFLCC	10
MCHFCFNKLFRCC	10
MCHKYVQLYRWWHHC	10
MCNYCFNKLFLWC	10
MCSYCLNKLCLCC	10
MCFYCFNKLFICC	10
MCHYCFNKPFLC	10
MCRFRPNKFTAWLPC	10
MCHYRFNKLFLGC	10
MCHHTRLHLWLWCNC	10
MCFYDIFVPFIIC	10
MCRYCFYKLFLCC	10
MCYYRFNKLFLCC	10
MCHYCVNKLFRCC	10
MCHYCLDKLFLCC	10
MCYSCVSHLFFCC	20
MCHYCFNMLFLRC	10
MCHPTRLDLWLCCNC	10
MCHPTRPHLWLWCNC	10
MCCSCFYRLFYCC	10
MCVFDIFIPFIFC	10
MCVFDVFCPFIPC	10
MCFYCFDATSLCC	10
MCHYFFNKLFLCCGC	10
MCFYCFNHLFICC	10
MCVYCFCHHFLCC	19
MCQYCFNRLFLCC	19
MCYFCFNRLFLCC	10
MCTFDTHLPFICC	10
MCHYCFTKLFLGC	10
MCVFDSFLPFTIC	10
MCDLKRELFYYLLVC	10
MCIFDTFLPSIFC	10
MCYYCFNKFFLCC	10
MCDLFYYLQHHKKVC	10
MCHYCFNKLPLCC	10
MCFSCFCRMFCCC	10
MCIFDLFCSFIVC	10
MCMPCFKHLFLCC	10
MCVFDTFLPFIFC	10
MCYDTWAAKYWWTFC	10
MCFFDLDLPFVFC	10
MCHYCSNKPFLCC	10
MCENKKVLFYYLLWC	10
MCHCCFNKLFLCCGC	10
MCYFCFHHLCLCC	10
MCLYCSDALFLCC	10
MCHYCFNKLWLCC	10
MCRWVKYYQIVHRQC	10
MCHYCFYELFLCC	10
MCFFCFDRIFLCC	19
MCEMRQSPFLPWTPC	10
MCHYCFNKFFFCC	10
MCHYFFYKLFLCC	20
MCCSCFNRLFYCC	10
MCHYFFNKLFLFC	10
MCHYCFNMLFICC	10
MCFSCCCRMFYCC	10
MCVFDSFSPFIIC	10
MCSYCFNKLCLGC	10
MCHYCFYKLFICC	19
MCPYCFYKLFLCC	10
MCYFCFHLLFLCC	10
MCQWLVWEFSYPTNC	10
MCLFDLHLPFIIC	10
MCIPCFKHLLLCC	10
MCFYCFNCLSICC	10
MCHYRASPHAPWIQC	10
MCHHCFNKPFLCC	10
MCHFCFHKLFLCC	10
MCLFDIFLPFIMC	10
MCYTCFSHLFFCC	10
MCHYCFNHLFLCC	10
MCRHLAYWKLWHRNC	10
MCSYCFNKLFLCCDC	9
MCHYCFSKLLLCC	9
MCFYCFSNLCLCC	9
MCYYCFNKLFLRC	18
MCHYCFNTLFFCC	9
MCQYCLNKLFLCC	9
MCRYCLNKLFLCC	9
MCQHCFNKLFLCC	9
MCQQWNLYTRHRHIC	9
MCIFDIHMPFIHC	9
MCHYGFNKLFLGC	9
MCHYCFSKPFLCC	9
MCFFCFDRVFLCC	9
MCHFRPYKFTAWLPC	9
MCLYCFNKLFFCC	9
MCDTWTLYQRFWTSC	9
MCHYCFNKLFLLC	18
MCHFCINKLFLCC	9
MCHYCFNKLFFFC	17
MCLYCLDALFLCC	9
MCCFDTFLPFIFC	9
MCISCFNKLFLCC	9
MCHFCFIKLFLCC	9
MCEIWYFNHQFHHVC	9
MCYYCFNKLFLFC	18
MCLYGFNKLFLCC	9
MCHYCFNNLLLCC	18
MCTFDLFCPFIVC	9
MCHYCFNNLFICC	9
MCHYRFKKLFLCC	9
MCHCCCNKLFLCC	9
MCHYCFHKFFLCC	9
MCHYCFNRLFLGC	9
MCFFCFDGLFLCC	9
MCHNCFNRLFLCC	9
MCLYWFNKLFLCC	9
MCFSCFSAMFYCC	9
MCHYCFRKLFLCC	9
MCLYCFDALFLC	9
MCEHRHPYSNFWILC	9
MCFSCFCRMCYCC	9
MCIYCFRGTFLCC	9
MCFYCFRRIFLCC	9
MCHFCFDFQFLCC	9
MCHYCFNKPFPCC	9
MCHHCFSKLFLCC	9
MCHNKYLYYYLLYSC	9
MCSKCFSDLYYCC	9
MCHFLPNKFTAWLPC	9
MCLFDIFLPFIVC	9
MCVFDSWLPFIFC	9
MCTYRFNKLFLCC	9
MCHPTWPHLWLCCNC	9
MCHYRFNKLFFCC	9
MCLCCFDALFLCC	9
MCDSCFSHLFFCC	17
MCFSCFSGLFICC	9
MCSYCFNRLFLCCGC	9
MCIFDSWLPFIYC	9
MCEMRQSPFLPWTSC	9
MCHYCFNKLILCCGC	9
MCLSCFNKLFLCC	17
MCKYCFNKLFLCC	9
MCHFCFDSLFLCC	18
MCFFCFDCLFLCCGC	9
MCYYWFNKLFLCC	9
MCHYCLNKLFLVC	9
MCHDCFNKLFLCCGC	9
MCVSCFCRMFYCC	9
MCLYCFNMLFLCC	9
MCHFRFDFLFLCC	9
MCFSCFGRLFMCC	9
MCMFDLFCPFIIC	9
MCHYCFNRLFHCC	9
MCYFCFAKLFLCC	9
MCHYCVNRLFLCC	9
MCIFDLFAPFICC	9
MCHYCSNKFFLCC	9
MCIYCFDFNFLCC	9
MCHYCLKKLCLGC	9
MCFYCFDATFLRC	9
MCRYCFNKFFLCC	9
MCISCFRRLFYCC	9
MCKYATLQWYKWFYC	9
MCFYCFCRRFLCC	9
MCRGLYDAFWFC	9
MCSYCFNKLFRCCGC	9
MCYSCFSHLIFCC	9
MCTFDIFMPFILC	9
MCKKDLFYYLFWRRC	9
MCRYCFNKLFLFC	9
MCHYCFNKLFSCC	9
MCFFCFKHLFLCC	9
MCPRAIKYWNVYYFC	9
MCSYCFYKLFLCCGC	9
MCFYCFSYLFLCC	9
MCFYCFNCLFICCGC	9
MCHDLLGPAFTFC	9
MCHYRSNKLFLCC	9
MCHSCFNRLFLCC	9
MCKHLYYYLLVKKHC	9
MCCYCFSCLFLCC	9
MCSYCFNNLFLCCGC	9
MCHYCFSRLYLGC	9
MCHYCLNELFLCC	9
MCIYCFSNLFLCC	9
MCNTWTLYQRFWTPC	9
MCFKREVVYWNVWRFC	9
MCHPTRLHFLLCCNC	9
MCHPTRLHLWPCRNC	9
MCFYCFNCLFIFC	9
MCHYCLNKLFVCC	9
MCHFRPNKITAWLPC	9
MCVYDSFLPFIIC	9
MCIPCFKHLFLFC	9
MCLYCFDALSLCC	9
MCYSCFSALFYYC	9
MCRFCFDFLFLCC	9
MCIPCFMHLFLCC	9
MCIPCFKHLFFCC	9
MCCSCLDRLFYCC	9
MCSKRFNDLYYCC	9
MCFFDLFYPFIPC	9
MCHYCLNKLFPCC	9
MCHLCFDFLFLCC	9
MCSYCLNKLLLCC	9
MCFSCFCRMFYGC	9
MCVYDIFVSFIIC	9
MCIFDSFFPFVFC	9
MCHCCFIKLFLCC	9
MCTYTMDYNTMEVFC	9
MCDTRSTRFHPWVTC	9
MCLFRPNKFTAWLPC	9
MCYFCFSKLFFCC	9
MCSMRETRFHVWRDC	9
MCFSCFNCLFICC	9
MCILDIHMPFIPC	9
MCFNCFRGTFLCC	9
MCHYCFSKLFLCCGC	9
MCSMRMGRHLPWRPC	9
MCFFCFAGLFFCC	17
MCHCCFNKLFRCC	9
MCHYCFNKLSPCC	9
MCFYCFRGTFLCCGC	9
MCHYRFNKLYLCC	9
MCHYCFNKFFLYC	8
MCRYCFNKLFPCC	8
MCYSCFNKLFICC	8
MCYVQYYRVWRSIC	8
MCHYCFNKLFVGC	8
MCHYCFNYLFLCCGC	8
MCPYCFNKLFRCC	8
MCHFCFDFLFLCCGC	8
MCHYCLKKLFLGC	8
MCHYCLKKLCLCC	8
MCTYCFNKLFLGC	8
MCFYCFSNLFRCC	8
MCFYCFNCLFIRC	8
MCFYCFDSVFLCC	8
MCQWFVWELSYPTNC	8
MCHSWFNKLFLCC	8
MCPYCSNKLFLCC	8
MCHYCFNKIFLCCGC	8
MCVFDSFLPFIICGC	8
MCAKHVLYYLLQHKC	8
MCLYCFYALFLCC	8
MCHYCFNKFFVCC	8
MCYFCFSKFFLCC	8
MCHNCYNKLFLCC	8
MCHFRPDKFTAWLPC	8
MCYYCVNKLFLCC	8
MCFSCFCRMIYCC	8
MCHYCFSRLYRCC	8
MCQYCFNKLFLFC	8
MCHPTRLHLWLFLCC	8
MCHYCLNKLFRCC	8
MCFYCFDANFLCC	8
MCHYCFYKLFLWC	8
MCKFKRDLYFYRLWC	8

## Sheet: NNK_FGF-R3C_X_FGF-R4
Sequence	FGFR3C_X_FGFR4_reads_R5
MCHFRPNKFTAWLPC	921452
MCHPTRLHLWLCCNC	215871
MCHYCFNKLFLCC	227824
MCVFDSFLPFIIC	90915
MCEQRWPRSLLWFPC	85108
MCDQRLSPYTPWFLC	72858
MCETWYYFEITKHLC	75586
MCVYDLFLPFIYC	57929
MCIFDIHMPFIPC	69747
MCVYDIFVPFIIC	50559
MCHTRANFYEPWLLC	49887
MCIFDNWLPFIYC	49018
MCHTRANFYEPWLPC	49818
MCIFDTFLPFIFC	43425
MCQQWNLYTRHWHIC	33211
MCSYCFNKLFLCC	51108
MCDTWTLYQRFWTPC	33214
MCFSCFCRMFYCC	44021
MCLYDSFLPFIFC	31785
MCTFDLFLPFIFC	34170
MCFFCFDRLFLCC	33895
MCTFDTFLPFIFC	25575
MCIFDLFCPFIVC	18083
MCVFDLFLPFIFC	21825
MCIRSLRYPFWFC	20083
MCQRYTKFHAYFC	19990
MCDQRLSPYTPWFPC	21811
MCIFDIFMPFILC	17332
MCVYDLFLPFIFC	16686
MCCFDSFLPFIFC	31307
MCFYDLFLPFIFC	14031
MCFYCFDSLFLCC	17892
MCLFDIFLPFIIC	13531
MCIFDLFVPFIFC	12914
MCYFCFHHLFLCC	15276
MCVFDSFLPFIFC	12094
MCVFDVFCPFIFC	12188
MCIFDNWLPFIFC	10639
MCLFDTFVPFIFC	11580
MCLFDSFLPFILC	10208
MCETWYYFEITKHPC	10880
MCVFDSFLPFVLC	8316
MCLFDIFCPFILC	9218
MCSTRYFKWQPWTPC	8731
MCVFDSFLPFILC	11532
MCLFDTFLPFIFC	9931
MCCFDIFLPFIFC	9066
MCLFDSFVPFIFC	11012
MCLFDLFVPFVFC	8726
MCEQRWPCSLLWFPC	7721
MCETWYYFEITKHFC	6252
MCVYDIFVPFIFC	6608
MCLFDLFCPFIFC	7045
MCHTRINYLWPWRPC	6037
MCTFDIFLPFILC	6285
MCIPCFKHLFLCC	10800
MCQQWNLYTRHWHTC	6754
MCLFDLFYPFIIC	6221
MCHFRPNKFTAWLLC	6375
MCDTKPPYSKHWTPC	8329
MCYFDPHFIFIPC	8170
MCQQWNLYTRHWHSC	8488
MCIWDSFVPFILC	4751
MCQQWNLYTRHWHNC	4409
MCHFRPNKLTAWLPC	5062
MCVFDLFLPFTFC	5001
MCVFDIFIPFVLC	4900
MCHTREPWNTRWRPC	6767
MCHFRPNRFTAWLPC	4157
MCHTWNWWNRTWYEC	3477
MCTTWYTFSLTSAPC	4489
MCLFDIFLPFIFC	7335
MCLYCFDALFLCC	5876
MCLFDSFVPFVFC	7671
MCLFDLFFPFIIC	4065
MCIFDLFAPFIYC	4006
MCTFDVFLPFIFC	4616
MCTFDTHLPFIYC	3962
MCHFRPNKFTAWPPC	3352
MCIFDIHMPFILC	3903
MCETWYYFEITKHIC	2994
MCHYCFSRLYLCC	5108
MCDQRLSPYTPWFQC	2698
MCEMRQSSFLPWTSC	3484
MCIFDTFLPFIIC	3097
MCHFCFDFLFLCC	4044
MCDVLIYHYWLPC	5102
MCLFDLHLPFIFC	3312
MCCFDSFLPFVIC	2881
MCIFDIFMPFIFC	2937
MCETKKKNDLYWQPC	2603
MCIFDTFLPFIYC	2687
MCIFDLFSPFIFC	2950
MCLFDSFLPFIFC	3226
MCHFRPNKFAAWLPC	2474
MCYFCFSKLFLCC	3736
MCVFDSWLPFVYC	2722
MCYFRPNKFTAWLPC	2356
MCIFDTFLPFILC	3631
MCTFDTHFPFITC	2975
MCFYCFSNLFLCC	3744
MCEHRHPPSLVWLPC	2425
MCHTRANFYEPWLFC	2036
MCIFDIFMPFIPC	2921
MCQQWNLYTRHWHMC	1798
MCHLRPNKFTAWLPC	2710
MCIFDSFFPFIFC	2841
MCHFRPNKFTARLPC	2427
MCDQRLSPYTPWFMC	1749
MCHFRPNKFTVWLPC	2129
MCIFDSFFPFIPC	2673
MCIWDSFVPFIFC	2825
MCHSRPNKFTAWLPC	1996
MCHYCFNRLFLCC	2974
MCTFDLFLPFIYC	2466
MCLYDSFLPFIIC	1889
MCHTRANFYEPWILC	1805
MCTFDTFLPFIYC	1880
MCFYDLFLPFIYC	1754
MCQMRDTPYGAWVPC	2283
MCEYRLTRYHAWRIC	1820
MCVFDLHCPFIFC	2002
MCIFDNWLPFICC	1928
MCLFDIFCPFIFC	1842
MCDTKSTRFHPWVTC	1522
MCHTRFPYSLTWTPC	2200
MCVFDSFLPFIPC	2481
MCTFDIFLPFIFC	1821
MCEMRQSSFLPWTPC	2067
MCLFDSFLPFIVC	2359
MCHFRPNKSTAWLPC	1650
MCHFRPNKFTSWLPC	1761
MCTFDTFLPFIIC	1673
MCHTRANFYEPWLIC	1466
MCFYDLFLPFIIC	1560
MCLFDSLLPFIFC	1733
MCETWYYFEITKHRC	2366
MCYSCFSALFYCC	2279
MCHFRPNKFSAWLPC	1645
MCKTLAYYLIVSRHC	1513
MCLFDLYCDFIFC	1705
MCVYDLFLPFICC	1578
MCQWFVWEFSYPTNC	1388
MCLFDSFLPFIIC	1861
MCCSCFDRLFYCC	1774
MCTFDLFLPFIIC	1816
MCHYCFNKLFLYC	1748
MCLFDLFLPYVFC	1471
MCLYDSFLPFIYC	1323
MCFYCFNCLFICC	1794
MCHFRPNKVTAWLPC	1342
MCVFDLFLPFIYC	1526
MCHFQPNKFTAWLPC	1350
MCIFDLWLPFTAC	1653
MCLFRPNKFTAWLPC	1321
MCETRGPLSLLWSPC	1276
MCYFDIFLPFIFC	1471
MCHFRSNKFTAWLPC	1328
MCHFRPDKFTAWLPC	1206
MCHYCFNKLFLFC	1377
MCIFDNWLPFIPC	1364
MCCDYYEVYWFGC	1543
MCLYDSFLPFILC	1874
MCDTKCKNCAHWRPC	1537
MCVFDSLLPFIFC	1367
MCHFRPNEFTAWLPC	1133
MCLFDVFCDFIFC	1746
MCHFRPNKFTAWFPC	1213
MCISCFQRLFYCC	1586
MCVFDLFLPFIIC	1124
MCVFDIHMPFIPC	1549
MCHFRPSKFTAWLPC	1086
MCVYDIFVPFILC	1364
MCHFRPNKFTAWRPC	1173
MCETWYYFEITKHHC	1120
MCHFRPNKFTTWLPC	1104
MCQQWNLYTRHWHVC	1130
MCTFDLFLPFILC	2059
MCIFDIFMPFIIC	1094
MCLFDSFLPFIPC	1196
MCVYDLFLPFIPC	1201
MCQQWNLYTRHWHPC	1416
MCYSCFSHLFFCC	1448
MCTFDTFLPFILC	1695
MCSMRGPNQYKWIPC	1234
MCHTWDWWNRTWYEC	845
MCRFRPNKFTAWLPC	987
MCHFWPNKFTAWLPC	996
MCVFDIFIPFVFC	1008
MCVFDLFVPYIVC	1255
MCVYDLFLPFIIC	1039
MCIFDLFLPFIFC	1089
MCVFDSFLPFIMC	889
MCVFDLFLPFILC	1392
MCTTRSSIYETWKAC	1240
MCIFDNWLPFIIC	965
MCHYRPNKFTAWLPC	929
MCRGFYDAFWFC	1140
MCEQRLSPYTPWFLC	982
MCHFRPNKFTAWLSC	949
MCHFRLNKFTAWLPC	960
MCCFDSFLPFIIC	1656
MCIFDLFCPFIFC	1451
MCHFRPNKFTAWLQC	731
MCVYDIFVPFIPC	1017
MCFDVNMVTGHVTVC	833
MCHFRPNKFTAWIPC	1263
MCIFDLFVPFIYC	889
MCFYCFDATFLCC	1131
MCIFDIHMPFIFC	1008
MCFYCFRGTFLCC	1441
MCVFDNWLPFIYC	924
MCHFRPNKFIAWLPC	864
MCHFRPNKFTALLPC	910
MCQMRDTPYSAWVPC	879
MCLFDPFLSFIPC	1013
MCHFRPNKFTACLPC	1145
MCIFDLFAPFIFC	911
MCVYDIFVPFIMC	664
MCHFRPYKFTAWLPC	859
MCIFDTFLPFIPC	902
MCDQRLSPYTPWFRC	1275
MCTFDLFIPFVLC	852
MCEQRLPRSLLWFPC	871
MCHPTRLHLWPCCNC	781
MCMFDLFCPFVIC	762
MCHYCFNKLFLWC	616
MCLFDIFCPFIPC	902
MCSMRRPFMNTWIPC	926
MCEYWSIYTPRWQLC	602
MCCFDSFLPFIYC	1370
MCYYCFNKLFLCC	1175
MCLFDTFYFFIPC	852
MCIFDSFLPFVFC	689
MCIFDLFVPFILC	994
MCHTRANFYEPWLRC	930
MCLFDIFCPFIIC	663
MCHFRPNKYTAWLPC	674
MCRYCFNKLFLCC	912
MCVFDVFCPFIYC	675
MCIFDLFVPFIIC	681
MCVFDSFLPFIVC	877
MCHYCFNKPFLCC	884
MCVFDSWLPFVFC	687
MCIFDNWLPFILC	981
MCVFDSFLPFIYC	676
MCIFDLFCPFILC	1357
MCLFDTFVPFIYC	659
MCHFRPTKFTAWLPC	653
MCHYCFDKLFLCC	881
MCIFDLFCPFIIC	862
MCLFDLFVPFVYC	628
MCHYCFNKLFICC	725
MCHPTRPHLWLCCNC	702
MCVFDTFLPFIFC	1103
MCLFDTFVPFIIC	617
MCTFDTFLPFIPC	678
MCLYDSFLPFIPC	723
MCDFRPNKFTAWLPC	606
MCTFDSWLPYILC	651
MCFFDLFCPFIYC	656
MCLFDLFVPFIFC	748
MCIFDLFLPFVLC	702
MCETRLNDRAPWQPC	544
MCTFDLFLPFIPC	831
MCHFRPNNFTAWLPC	723
MCDQRLSPYTPWFIC	651
MCHDFTFVFTLAQC	494
MCLFDTFLPFIYC	591
MCEQRWPRSLLWLPC	761
MCVFDVFCPFIIC	603
MCHFRPHKFTAWLPC	591
MCHPTRLHLWLCRNC	636
MCTFDIFLPFIIC	553
MCTFDIFLPFIPC	673
MCHFRPIKFTAWLPC	590
MCLYDLFLPFIFC	678
MCTFDTHLPFIFC	628
MCHFRPNKITAWLPC	584
MCIFDLFCPFIMC	472
MCFYCFNRLFICC	673
MCHPTRLHLWLWCNC	576
MCVYDLFLPFILC	829
MCEHRHPLSLVWLPC	568
MCFSCFAGLFFCC	787
MCYPTRLHLWLCCNC	577
MCHYCFNKLFPCC	732
MCCFDIFLPFIIC	530
MCHYCFDFLFLCC	766
MCLFDIFLPFILC	957
MCIFELNLPFIPC	748
MCHFRPNMFTAWLPC	550
MCCFDIFLPFIYC	510
MCEQRWPRSSLWFPC	563
MCHYCLNKLFLCC	942
MCEQRWPHSLLWFPC	602
MCIFDTFLPFICC	576
MCCFDSFLPFILC	1536
MCHPIRLHLWLCCNC	551
MCHPTRLYLWLCCNC	517
MCEQRWPRSLLWFLC	609
MCTFDIHMPFIPC	694
MCHFRPNKCTAWLPC	504
MCETWYYFEITKRLC	508
MCHFRPNKFTAWLPCGSGC	509
MCDQRLSPYTPWLLC	520
MCLFDTFLPFIIC	785
MCEMRSTVFTRWQPC	626
MCETWYHFEITKHLC	533
MCTFDNWLPFIYC	542
MCVYDTFVPFIIC	563
MCQQWNLYTRHWHAC	716
MCIFELFFPFIPC	724
MCHFRPKKFTAWLPC	643
MCVYDIFVPFIYC	485
MCDQRLSPYTPWFFC	539
MCHFRPNKFTAWHPC	501
MCHFRPNQFTAWLPC	502
MCLFDSFVPFIYC	503
MCHPTRLHLWLCCIC	422
MCQQWNLYTRHWHDC	475
MCDTRSTRFHPWVTC	387
MCVFDVFCPFILC	706
MCHYCFNKLLLCC	839
MCFYDLFLPFILC	644
MCYFDPHFIFILC	568
MCIFDTFLPFVFC	517
MCYDTWATKYWWTFC	494
MCVSCFQRLFYCC	625
MCHYCFNKLSLCC	680
MCHPTRLHLRLCCNC	574
MCHTRANFYEPWRLC	511
MCVFTIFPFPFIPC	558
MCHYCFDFLFFCC	624
MCTFDTFLPFICC	471
MCLFDSFVPFIIC	483
MCLYDSFLPFICC	461
MCIFDIFLPFIFC	498
MCQQWNLYTRYWHIC	437
MCIFDSFFPFVFC	472
MCTFDLFLPFICC	578
MCQFDTFIFPFIPC	557
MCVYDIFVPFIVC	557
MCHHCFNKLFLCC	576
MCHPTRLHSWLCCNC	445
MCHYCFSKLFLCC	631
MCYDLLGPAFTFC	433
MCVFDLFCPFIVC	354
MCHYCFNKLFLC	352
MCCFRPNKFTAWLPC	439
MCNFRPNKFTAWLPC	428
MCDFKGKYDRTWTPC	561
MCHFRPNKFTAGLPC	452
MCHFCFNKLFLCC	565
MCSMRETRFHVWRDC	474
MCLFDTMLPFIYC	446
MCFEMAYYLSVPQLC	375
MCRPTRLHLWLCCNC	428
MCLFDLFCPFIYC	378
MCLFDLFCPFIIC	395
MCLFDIFLPFIPC	582
MCHPTRLHLWRCCNC	423
MCLFDIFLPFIYC	515
MCQRYTKFHAYYC	365
MCLFDTFVPFILC	657
MCIFDTFVPFIFC	483
MCLYCFNKLFLCC	935
MCLFDHFLPFVYC	449
MCVYDSFLPFIIC	421
MCHPTRLHLWLCCSC	576
MCVFDSFLPFITC	434
MCHYCFNKLFLCCGC	551
MCCFDIFLPFILC	513
MCLFDTFLPFILC	578
MCTFDSLLPFIFC	417
MCTFDVFLPFIYC	361
MCHFRPNKFTPWLPC	413
MCLFDLFYPFIFC	360
MCVFDLFLPFIPC	410
MCHPTRLHLWLRCNC	373
MCHFRPNKFTAWLTC	407
MCVFDIFMPFILC	402
MCCYELLWDFISVSC	450
MCHYRFNKLFLCC	509
MCQPTRLHLWLCCNC	516
MCHTRANFYEPWIPC	349
MCEFDSFLPFIIC	376
MCVLDSFLPFIIC	562
MCIRSLRYPFWYC	327
MCHFLPNKFTAWLPC	366
MCHYCSNKLFLCC	471
MCHTRANFYEPWLHC	325
MCEMRQSPFLPWTSC	312
MCHFRPNKFTEWLPC	340
MCDTWTLYQRLWTPC	410
MCLYDNLLPFILC	405
MCIFDTHMPFIPC	461
MCVFDSFLPFTIC	342
MCHFRPNTFTAWLPC	304
MCSYCFNKLFLYC	423
MCVFDLFLPFTYC	314
MCVFDLFVPFIFC	389
MCTFRPNKFTAWLPC	297
MCIFDLFLPFVFC	472
MCQQWNLYTRHWHFC	306
MCTFDLFIPFVFC	331
MCLFDSFVPFILC	533
MCPFRPNKFTAWLPC	295
MCLFDLFCPFILC	456
MCHYCFNKLFLRC	492
MCSTKYPFTHIWRPC	264
MCVFDLWLPFYFC	336
MCAFDSFLPFIIC	373
MCLFDLFLPFIMC	262
MCETWYYFEITKQLC	398
MCSYCFNRLFLCC	408
MCIFDIHMPFIHC	300
MCETRYYFEITKHLC	387
MCHPTRLHFWLCCNC	342
MCVFDLFLPFICC	344
MCHTRANLYEPWLLC	335
MCHSTRLHLWLCCNC	316
MCVFDSLLPFIIC	487
MCFFDSFMPFIFC	335
MCHFRPNKFTAWLAC	274
MCHPTRLHLWLGCNC	296
MCDTWTLYQRFWMPC	420
MCEQRRPRSLLWFPC	473
MCFSCFRRMFYCC	376
MCVFEIIGPFYTC	241
MCSKCFNDLYYCC	395
MCIFRPNKFTAWLPC	269
MCFFDLHLPFVFC	328
MCIYDIFVPFIIC	305
MCIYCFNFNFLCC	420
MCIFDTFLPFTFC	298
MCHPTRFHLWLCCNC	293
MCVFDSFSPFIIC	302
MCIFDIHMPFTPC	559
MCPYCFNKLFLCC	554
MCVPCFKHLFLCC	423
MCYFCFDSLFLCC	394
MCLFDLHLPFIYC	269
MCVFDSFLPLIIC	302
MCLFDIHMPFIPC	428
MCLFDLFFPFIPC	935
MCMFDSFLPFIIC	294
MCFSFVYTLSQLC	265
MCFFDPHLPFIFC	283
MCVFDSSLPFIIC	318
MCHPTRLHVWLCCNC	288
MCSYCFNKLFLWC	221
MCIFDIHMPFIIC	297
MCIFDSFLPFIFC	701
MCVFDIFIPFVIC	221
MCEYRLASWMPWLPC	272
MCEYDLFLPFIYC	298
MCIFDLFVPFIPC	269
MCEQRWPRPLLWFPC	265
MCLFDLFFPFIFC	269
MCIFDSFFPFILC	467
MCLFDLFVPFVLC	350
MCHPTWLHLWLCCNC	291
MCETWYYFEITRHLC	259
MCDQRLSPYTPWSLC	243
MCLFDTFLPFIPC	257
MCIFDIHMPFITC	276
MCVYDLFLPFVYC	251
MCDQRLSPYTPWFSC	302
MCCFDSFLPFIPC	540
MCIFDTHFPFILC	251
MCTFDVFLPFIIC	233
MCHFRTNKFTAWLPC	197
MCEHRYSTAAPWLPC	250
MCIFDIFLPFILC	230
MCTTRSSIYETWKPC	290
MCAYDLFLPFIYC	247
MCHTRANFYEPLLPC	249
MCIFDSFVPFIFC	297
MCHPTRLHLWLCCDC	262
MCPDFSFVFTLFQC	194
MCVYDIFVPFITC	245
MCIFDIHMPFISC	268
MCIFDTFLPFIVC	273
MCHPTRLHLWHCCNC	250
MCHTRINYLWPWRLC	233
MCHTWNWWSRTWYEC	192
MCTFDTHFPFIPC	265
MCDQRLSPYTPWLPC	254
MCVFGSFLPFIIC	254
MCVYDLFLPFTYC	257
MCIFDSFLPFILC	253
MCIFDSWLPFIYC	243
MCFYCFDSLFLYC	298
MCFYDLFLPFIPC	252
MCFYCFDSLFLFC	240
MCTFDLFLPFVFC	277
MCCFDTFLPFIFC	274
MCFFDIHMPFIPC	305
MCHTRANLYEPWLPC	243
MCVFDVFCPFICC	238
MCVFDSFLPFVIC	364
MCEQRWPRSLPWFPC	216
MCLFDIFLPFIMC	177
MCEQRWPRSLLWSPC	219
MCDTWTPYQRFWTPC	176
MCIFDLFSPFIYC	176
MCHFRPNKFTAWLRC	448
MCLFDNWLPFIYC	218
MCTFDIFMPFILC	216
MCVYDSFLPFIFC	336
MCFYDLFLPFICC	234
MCFSCFCHMFYCC	299
MCHPTRHHLWLCCNC	220
MCTFDLFCPFIVC	173
MCFSCFDHLFHCC	294
MCLFDLHLPFIIC	203
MCIFDNWLPFVYC	215
MCIFDNWLPFTYC	224
MCKTLAYYLIVSRRC	320
MCIFDLFCPFIPC	387
MCIFDLFVPFICC	215
MCCFDSFLPFICC	425
MCSMRMGRHLPWRPC	204
MCVYDLSLPFIYC	232
MCIFDIHMPLIPC	269
MCFFCFNRLFLCC	325
MCHTRINHLWPWRPC	169
MCIFDVFCPFIFC	230
MCHPTRLRLWLCCNC	214
MCDQRLSPYTPWFHC	264
MCLFDSFVPFIPC	243
MCHIRPNKFTAWLPC	168
MCETWYYFEITKHQC	167
MCVYDLLLPFIYC	259
MCIFDIHTPFIPC	270
MCTFDSFLPFIFC	208
MCLFDSFVPFVYC	285
MCHTREPWNTRWRLC	203
MCVYDSFLPFIYC	224
MCDQRWPRSLLWFPC	196
MCAFDLFLPFIFC	266
MCHPTRLHLCLCCNC	256
MCIFDSFFPFIIC	197
MCILDIHMPFIPC	280
MCVFDNFLPFIIC	206
MCFFDNWLPFIYC	217
MCDQRLSPYTPWCLC	162
MCHVRPNKFTAWLPC	161
MCHTWNLWNRTWYEC	160
MCETWYYFEVTKHLC	201
MCLFDTFVPFIPC	207
MCMFDLFIPFVLC	193
MCVFDVFCPFIPC	217
MCQFRPNKFTAWLPC	271
MCHFRPNKFPAWLPC	158
MCHYWFNKLFLCC	273
MCTFDLFLPFTFC	258
MCHPTRRHLWLCCNC	198
MCETWYYFEITKHMC	157
MCRSCFHSLFYCC	277
MCETWYYFEITKHYC	157
MCLFDLFVPFVCC	201
MCHPTQLHLWLCCNC	213
MCLSCFCRMFYCC	248
MCLFDTFLPFICC	195
MCRFYEFFWSFPC	289
MCFYCFRCLFICC	274
MCHYCFNKFFLCC	289
MCFFCFDHLFLCC	265
MCHHRTNWFSSWLPC	184
MCTFSWPMSYPFIPC	219
MCIFDNWPPFIYC	200
MCIFDNWLPLIYC	214
MCVYDIFVPLIIC	223
MCHYCFYKLFLCC	260
MCQQWNLYTRHWHKC	151
MCHFRPNKFNAWLPC	151
MCHYCFNELFLCC	253
MCLFDTFVPFICC	182
MCVFDSFLPFIICGC	187
MCDTWSLYQRFWTPC	149
MCVFDLHCPFIYC	149
MCHFPPNKFTAWLPC	149
MCFSCFSRLFMCC	215
MCHTRANFYEPWPLC	149
MCVFDNWLPFIFC	197
MCTFDVFLPFILC	250
MCVFDSFLPFISC	227
MCAYDIFVPFIIC	198
MCTFDTHFPFIIC	194
MCEQRWPCSSLWFPC	146
MCDMRRPFSCVWTMC	146
MCEQRWPRSLQWFPC	219
MCDQRFSPYTPWFLC	145
MCLYCFDALFLYC	199
MCVFDIFVPFIIC	175
MCFYCFDRLFLCC	247
MCIFDIHMPSIPC	217
MCPFTFVFTMLQC	144
MCHPTRLQLWLCCNC	201
MCTFDLFVPFIFC	242
MCFYDSFLPFIFC	193
MCILDNWLPFIYC	221
MCHPTRLHLLLCCNC	185
MCDHWYKWMFTVHAC	186
MCVFDLFSPFIFC	190
MCFYDLFIPFIFC	197
MCIFDSFCPFIVC	141
MCHPTLLHLWLCCNC	196
MCVFDIFLPFIIC	179
MCVRSLRYPFWFC	181
MCVSDSFLPFIIC	191
MCIFDNWLPFIVC	225
MCKTLAYYLIVSRQC	140
MCNQRLSPYTPWFLC	140
MCVYDIFVLFIIC	176
MCHTRANIYEPWLLC	139
MCFSCFSGLFFCC	277
MCIFCFDRLFLCC	249
MCHYCFNKLFFCC	237
MCLFDSFLPFIYC	136
MCDTWTLYQRFWAPC	136
MCHPARLHLWLCCNC	172
MCLFDLHLPFILC	216
MCETWYYFETTKHLC	173
MCLFDLFVPFVIC	135
MCFSCFCRMFYYC	188
MCEQRWPRSLLRFPC	166
MCIFDAFVSFIVC	200
MCIFDTSLPFIFC	170
MCHFRHNKFTAWLPC	134
MCTFDTFLPFVFC	174
MCFYDIFVPFIIC	173
MCQRYTKFHAYIC	133
MCTFDTFLPFTFC	165
MCHTREPWSTRWRPC	170
MCHTRANFYEPWFLC	132
MCHYCFNKLFLSC	275
MCEQRWPRSLLWFQC	131
MCIFDTFSPFIFC	169
MCVFDIFIPFVPC	130
MCLYDSLLPFIFC	272
MCYSCFDRLFYCC	206
MCVYDIFAPFIIC	161
MCIFDNLLPFIYC	164
MCIFDLFCPLIVC	155
MCVFDSFLPSIIC	172
MCIFDTLLPFIFC	208
MCVYDLFSPFIYC	167
MCLYDSFLPFTFC	173
MCHLFEICQFIFC	162
MCHFCFHHLFLCC	221
MCHCCFNKLFLCC	209
MCHCRPNKFTAWLPC	126
MCIWDSFVPFIYC	171
MCFFDTFLPFIFC	241
MCLFDLFCPFIPC	182
MCIFGNWLPFIYC	159
MCHYDSFLPFIFC	176
MCNPTRLHLWLCCNC	156
MCFPCFCRMFYCC	207
MCVTWYYFEITKHLC	156
MCIFDNWLPFIHC	153
MCETWYYFEITKHSC	154
MCQQWNLYTRHWHLC	125
MCIFGIHMPFIPC	198
MCIFDNWLPSIYC	158
MCDYDIFVPFIIC	175
MCVFDIFIPFILC	159
MCIFDTFLPFIFFC	124
MCYSCFCRMFYCC	187
MCEQRCPRSLLWFPC	172
MCVFDSFLPFINC	123
MCVFDLFVPYIIC	160
MCFYCFSCLFLCC	243
MCYFWPNKFTAWLPC	123
MCLFCFDRLFLCC	227
MCIFDNWLPC	122
MCVYDLFLPLIYC	177
MCETWYYLEITKHLC	190
MCCFDIFLPFIPC	169
MCVFDTFVPFIFC	153
MCDQRLSPYTPWFLCC	235
MCDPTRLHLWLCCNC	164
MCVFDSFFPFIIC	156
MCHYCFNNLFLCC	198
MCTLDTFLPFIFC	153
MCPYDSFLPFIFC	157
MCIFDIHMPFIPCGC	174
MCVFDSFLLFIIC	159
MCVYDLFLPFIHC	156
MCVYDILVPFIIC	153
MCVYDIFVSFIIC	119
MCTFDTHLPFIPC	165
MCIFDTFMPFIFC	119
MCHTRANFYEPWPPC	152
MCFFDLFLPFIFC	256
MCIFDSFFSFIPC	169
MCTFDPFLPFIFC	223
MCLYDLFLPFIYC	294
MCVFDSWLPFIFC	160
MCIFDTFLPFIFCGC	164
MCFFDLDLPFVFC	170
MCSYCFNKPFLCC	207
MCETRGPLSLLWYPC	142
MCQQRNLYTRHWHIC	115
MCVFDLFLPFTIC	115
MCLYDSFLPFVFC	155
MCHTRANFYEPWLSC	115
MCVYDIFVPFTIC	114
MCLYDPFLPFIFC	155
MCDQRLSPYTPWFVC	114
MCTFDSWLPYIFC	114
MCHTWNWWDRTWYEC	114
MCMYDLFLPFIYC	154
MCYTRANFYEPWLLC	113
MCTFDSWLPYIIC	113
MCCFDLFFPFIVC	161
MCCFDIFLPFICC	141
MCVFDGFLPFIIC	145
MCHPTRLHLWLCGNC	144
MCGQRWPRSLLWFPC	113
MCVFDRFLPFIIC	188
MCEQRWLRSLLWFPC	112
MCHTRANFYEPWIFC	112
MCSYCFDKLFLCC	172
MCETWYYFEITKRPC	142
MCDQRLSPHTPWFLC	112
MCIFDIFVPFILC	112
MCVFDLFLPFTCC	112
MCTFDTHLPFICC	112
MCIFDIHMPFIYC	172
MCHPTRLHWWLCCNC	112
MCQQWNLYIRHWHIC	112
MCHYCCNKLFLCC	198
MCHYCFNKLFLGC	111
MCVYDIFVPFVIC	137
MCIFDIRMPFIPC	150
MCSYCFNKLFLC	111
MCVFDSFLSFIIC	154
MCDQRPSPYTPWFLC	111
MCILDTFLPFIFC	155
MCIFDTFMPFILC	110
MCLFDLFCPFICC	140
MCTFDLFSPFIFC	151
MCIFDNRLPFIYC	182
MCLYDSFLPFIVC	109
MCIFDTFLPLIFC	147
MCFYCFNKLFLCC	184
MCTFDTFLPLIFC	143
MCEQHWPRSLLWFPC	137
MCTFDVFLPFIPC	135
MCHTRANFYDPWLPC	108
MCDTRTLYQRFWTPC	145
MCEHRWPRSLLWFPC	141
MCETWYYFGITKHLC	108
MCHPTRLHLWLCCYC	108
MCVYDLFLPFIYCGC	108
MCVFDLFLPFVFC	150
MCIFDLFSPFIIC	108
MCEQRWPRSLRWFPC	133
MCVYGIFVPFIIC	140
MCDTKPPYSKHWTLC	107
MCDQRLSPYTPRFLC	107
MCHLTRLHLWLCCNC	142
MCFFCFDRLFLYC	166
MCHYCFNKLYLCC	179
MCSYCFNKLSLCC	159
MCVYDLFLPFVFC	157
MCLYCFDALFLFC	139
MCIFDLWLPFTPC	105
MCIFDLFCPFIYC	142
MCHFRPNKFTGWLPC	104
MCIFGTFLPFIFC	151
MCLFDSFVPFVLC	338
MCVQRWPRSLLWFPC	104
MCGTWYYFEITKHLC	144
MCHPTRLHLWLCYNC	139
MCHPTRLHLWLCWNC	104
MCLYDSSLPFIFC	135
MCDTKSTRFHPWVAC	104
MCVFDLHCPFIIC	104
MCEQRWPRSLLWFSC	103
MCHPTRLHLWFCCNC	140
MCDTKPPYSKHWIPC	138
MCIFDLFCPFIAC	103
MCQQWNLYTRHWRIC	137
MCTFDTFLPFIVC	103
MCHTRANVYEPWLLC	102
MCVYDIFLPFIFC	143
MCISDIHMPFIPC	140
MCFSCFDRLFLCC	186
MCYTRANFYEPWLPC	130
MCIWDSFVPFIIC	139
MCVFDSFLPFICC	130
MCVYDIFVPSIIC	131
MCESWYYFEITKHLC	101
MCMQKKPGHSKWFPC	101
MCIFDIHMPFVPC	162
MCLFDSFVPFVIC	159
MCDTWTLYQRVWTPC	101
MCIFDSFFPFIYC	101
MCTTWYTFLLTSAPC	100
MCIFDIHMLFIPC	206
MCQRYTKFHAYLC	152
MCETWYYFEITKRFC	100
MCEMRQSSFLPWTLC	100
MCHHTRLHLWLCCNC	99
MCRTLAYYLIVSRHC	99
MCIFDLFLPFTFC	99
MCFRSLRYPFWFC	99
MCHYCFNKLFRCC	131
MCEAWYYFEITKHLC	131
MCSTRYFKWQPWTLC	99
MCLFDSFVPFICC	151
MCHPTRLHLWLYCNC	131
MCSYCFNKLFLRC	186
MCTFDTSLPFIFC	98
MCRSCFDRLFYCC	148
MCFYCFDSLFLWC	98
MCFTFVYSLSQLC	98
MCIFDLFFPFVPC	181
MCHTRSNFYEPWLLC	97
MCFFDLFCPFIFC	161
MCHYCFNKLFHCC	133
MCGFDSFLPFIIC	124
MCHYGFNKLFLCC	157
MCVFDSWLPFIYC	97
MCFFCFYRLFLCC	170
MCFSCLCRMFYCC	159
MCHTRANFYGPWLPC	97
MCLFDSFLPLILC	96
MCVFDSFLPFVMC	96
MCHYYFNKLFLCC	153
MCSYCLNKLFLCC	166
MCVHDLFLPFIYC	139
MCSYCFNKLFLFC	162
MCKQRWPRSLLWFPC	95
MCFSCFCRMLYCC	238
MCLFDIFLPFIVC	95
MCHYCFSRLYLYC	149
MCTFDTLLPFIFC	130
MCIWDSFVPFIVC	94
MCVYDIFVPFISC	139
MCHSCFNKLFLCC	157
MCFFDLFYPFIPC	184
MCEQWNLYTRHWHIC	94
MCIYDSFLPFIFC	132
MCVYGLFLPFIYC	127
MCVFDAFCPFIFC	136
MCIFDLFSPFILC	162
MCVYDLFLLFIYC	121
MCIFDLFVPFVFC	126
MCHFRPNKFTAWLPCGC	94
MCEMRQSPFLPWTPC	93
MCLFDHFIDFIFC	123
MCIFDLFAPFICC	125
MCDTWTLYQRFWKPC	93
MCIWDSFVPFIPC	175
MCLYCFDSLFLCC	162
MCLFDLYCDFIYC	92
MCEYRLASWMSWLPC	126
MCRFYELFWSFPC	224
MCVYDLFLPSIYC	91
MCVYDLFLPFVLC	91
MCETWHYFEITKHLC	119
MCIFDNWLSFIYC	123
MCSHCFNKLFLCC	138
MCLFDLFYPFILC	91
MCIFDNWLLFIYC	127
MCLFDSFVPFVCC	155
MCIFDTFFPFIFC	91
MCHTRASFYEPWLLC	90
MCHFGPNKFTAWLPC	90
MCIFDIFIPFVLC	90
MCIFDNCLPFIYC	122
MCTYCFNKLFLCC	150
MCNYCFNKLFLCC	166
MCIFDVFLPFIFC	123
MCHYRPNVLTNWMPC	158
MCVFDLFLPFIVC	89
MCHTRANFYEPLLLC	89
MCLEYLFLKRFFNC	142
MCQRYTKIHAYFC	89
MCHYCFDALFLCC	152
MCFYCFNCLFIFC	125
MCTFDLFLPFIVC	89
MCPYDSIFWWPNTC	89
MCFFCFRRIFLCC	166
MCLFDSLLPFIIC	89
MCDRRLSPYTPWFLC	88
MCQQWNLYARHWHIC	88
MCDHRLSPYTPWFLC	88
MCIFDLFLPFIYC	88
MCHYCFKKLFLCC	270
MCVFDLFLPFIFFC	88
MCVFDSFLPFVFC	164
MCHTRASFYEPWLPC	120
MCYSCFCHLFYCC	126
MCHTRANFYEPWHLC	87
MCVFDLFCPFIFC	113
MCSSCFCRMFYCC	146
MCVFDIFLPFIFC	169
MCHTRANFYEPWLVC	87
MCHPTRLHLWLCCKC	118
MCVFDLFLPFTLC	150
MCSYRFNKLFLCC	136
MCMFDTFLPFIFC	114
MCHFRPNKFTAWLHC	146
MCVYDLFLPFMYC	85
MCSYCFSKLFLCC	140
MCETWYYFEITEHLC	111
MCVFDLFFPFTPC	123
MCVYDVFVPFIIC	85
MCIFDIYMPFIPC	115
MCTFDLLLPFIFC	112
MCLYGSFLPFIFC	84
MCTFDLFLPLIFC	141
MCETWYYSEITKHLC	84
MCFFRPNKFTAWLPC	84
MCIRSLRYPFWLC	147
MCAFDTFLPFIFC	110
MCHTRFPYSLTWTLC	83
MCYSCFSHLFYCC	142
MCIFDFFLPFVFC	83
MCVFDSWLPFVCC	83
MCQMRDTPYGAWVLC	83
MCVFNSFLPFIIC	121
MCIFDIFMPFIYC	83
MCTFDIFLPFIYC	83
MCIFDIFLPFIIC	83
MCVYDIFVPFINC	83
MCHTRANFYESWLPC	109
MCSTRSSIYETWKPC	83
MCETWYYFKITKHLC	83
MCHPTRLHLWLCCNCGSGC	82
MCHTRANFYEPRLLC	82
MCFSCFDHLFYCC	121
MCLYDNLLPFIFC	82
MCDQRLSPYTPWYPC	82
MCHFRPNKFTASLPC	82
MCDYCFNKLFLCC	125
MCLPTRLHLWLCCNC	82
MCLFDHFFPFIVC	114
MCIFDFHMPFIPC	124
MCIFDIWLPFIYC	116
MCEQRLSPYTPWFQC	81
MCHPTRLHLWICCNC	81
MCCFDSFLPFTFC	161
MCHTRANFYEPWLTC	81
MCLFDIFFPFILC	81
MCQQWNLYTRYWHMC	81
MCEMRSTVFTRWQSC	81
MCIFDLFCSFIVC	81
MCSYCFNKLLLCC	134
MCLFDIFLPFICC	80
MCTFDLFFPFIFC	80
MCQRYTKFHAYCC	111
MCISCFCRMFYCC	137
MCLYDSFLPFIFFC	80
MCFFDLSLPFVFC	80
MCIFDPFVPFIFC	109
MCVYDIFVPFIICGC	108
MCHFRANKFTAWLPC	80
MCYSCFHHLFYCC	148
MCFSCFCRMFYFC	130
MCHFDTFVPFIFC	111
MCLFDTMLPFIFC	80
MCISDNWLPFIYC	80
MCIFDAFLPFIFC	109
MCVFDLFAPFIYC	80
MCVWDSFVPFILC	80
MCYDLLGPAFIFC	80
MCVYDISVPFIIC	79
MCVFDSFLPFMIC	107
MCHYCFNKLCLCC	127
MCTFDTFLPFIFFC	79
MCQRYTKLHAYFC	108
MCCFDIHMPFIPC	118
MCIFDNWLPFIYCGC	79
MCHYCFSRLYLFC	111
MCIFDIHVPFIPC	109
MCVFDIFMPFIFC	78
MCDTWTLYRRFWTPC	78
MCIFDSFLPFIIC	113
MCQQWNLYTRRWHIC	78
MCQQWNLYTRHWHRC	78
MCGQRLSPYTPWFLC	78
MCHYCVNKLFLCC	135
MCFSCFCRMFHCC	118
MCSYCFNKLFPCC	135
MCETGYYFEITKHLC	77
MCIFDLWLPFTVC	77
MCYFCFDRLFLCC	139
MCFSCSCRMFYCC	125
MCIFDNWLPFMYC	104
MCDTWTLYQRFWTLC	77
MCTFDVFLPFICC	105
MCDVLIYHYWLLC	122
MCVYDIFMPFIIC	77
MCVYDLFLPFTFC	76
MCHTRANFYDPWLLC	76
MCETWYYVEITKHLC	76
MCSTRYFKWQPWMPC	121
MCIFDVHMPFIPC	141
MCVYDLFFPFIYC	76
MCHYCYNKLFLCC	126
MCVHDIFVPFIIC	76
MCHPTRLLLWLCCNC	76
MCIFDIHIPFIPC	214
MCVFDSYLPFIIC	115
MCLFDSLLPFIYC	75
MCVFDLFVPFVFC	108
MCVYDLFLSFIYC	110
MCQQWNPYTRHWHIC	75
MCTFDLSLPFIFC	114
MCHYCFTKLFLCC	120
MCHQWNLYTRHWHIC	105
MCIFDLFCPFTVC	74
MCTFDLFLPFIFFC	74
MCTFDNWLPFIFC	106
MCVFDIFCPFIFC	74
MCHYCFIKLFLCC	125
MCVFDSFVPFIFC	121
MCFYCFDALFLCC	130
MCCFDSFLPFVFC	112
MCPFDTFVPFIFC	73
MCQYCFNKLFLCC	220
MCEQRWSRSLLWFPC	73
MCFFCFCRRFLCC	130
MCERRWPRSLLWFPC	73
MCQQWNLYTRHRHIC	73
MCLYDSFLPFIFCGC	73
MCLFDVFCDFIYC	73
MCHTRSNFYEPWLPC	73
MCQQWNLHTRHWHIC	73
MCHYCFNKLFLPC	110
MCHFRPNKLTACLPC	73
MCSYCFNKLFLCCGC	122
MCEPWYYFEITKHLC	73
MCYFCFHHLFICC	73
MCELLYFYFWMPC	112
MCVFDIFCPFILC	73
MCIFDIFMPFTLC	72
MCIFDLFAPFIPC	72
MCIFDLLCPFIVC	72
MCLYDSFFPFIFC	72
MCDTWTLYQRSWTPC	72
MCFLCFDRLFLCC	111
MCDQRLSPYTSWFLC	72
MCNMFTYVMTMDQIC	71
MCHYCFNKLFIFC	108
MCETWCYFEITKHLC	71
MCDQRLSPYTLWFLC	71
MCIFDIFVPFIIC	71
MCDQRLNPYTPWFPC	71
MCIFDTFFLPFIFC	110
MCFFCLYDSYLCC	123
MCHTRANFYEPWFPC	71
MCEYRLTRYHAWRTC	70
MCLFDIFCPFIYC	70
MCYFCFHRLFLCC	108
MCIFDTFLLFIFC	70
MCFFCFDRLFLWC	70
MCDTWTLYQRFWTQC	70
MCYQRLSPYTPWFLC	70
MCLFDLFCPFIVC	100
MCVYDLHWNFYPC	101
MCVFDIFIPFIFC	70
MCHPPRLHLWLCCNC	70
MCDTRKWWSTVWIPC	70
MCHTRANFYGPWLLC	70
MCHYCFNMLFLCC	118
MCVFDPFLPFIFC	103
MCIFDIHMPFIRC	69
MCLYDSFLPSIFC	69
MCLFDLYCDFIIC	69
MCTLMWHATHPWHVC	69
MCEYRLTRYHAWRMC	69
MCVLDLFLPFIFC	69
MCLYDSFSPFIFC	69
MCHTRANSYEPWLPC	68
MCLFDLFLPFIFC	154
MCVIDSFLPFIIC	68
MCHYCFNKHFLCC	115
MCHYCFDSLFLCC	96
MCIFDIHMSFIPC	102
MCHTRANFYEPRLPC	68
MCHTTRLHLWLCCNC	68
MCEQRWPRSLLWVPC	68
MCHTRANFYEPWRPC	68
MCDQCLSPYTPWFLC	68
MCEQRWPGSLLWFPC	68
MCEQRWPRSLLWYPC	109
MCDQRLSPYTPWILC	67
MCHTRANFHEPWLPC	67
MCTFDLFLPFIFCGC	67
MCFYDPFLPFIFC	67
MCETWYYFEITKHCC	67
MCFFCFGRLFLCC	95
MCVYCFNFLFLCC	100
MCIFDLSCPFIVC	67
MCHPTRLHMWLCCNC	67
MCFFCFCRMFYCC	108
MCHQRLSPYTPWFLC	67
MCHTRANFYELWLPC	94
MCGYDLFLPFIYC	66
MCDQRLSSYTPWFLC	66
MCDQRHSPYTPWFLC	66
MCFFCFRRTFLCC	105
MCVYDIFVPFICC	66
MCEQRWPRSFLWFPC	117
MCTFGTFLPFIFC	96
MCHFDTFLPFIFC	66
MCDTKSTRFHPWVPC	66
MCLFDIFMPFILC	105
MCIFDTFLSFIFC	65
MCDTKSTRFHPWVMC	65
MCVFDIHMPFILC	65
MCETWYYFEMTKHLC	65
MCSYCFWLSYCCC	64
MCIFDDWLPFIYC	64
MCVFDLFVPYIFC	64
MCHTRANSYEPWLLC	64
MCEQRWPRSLMWFPC	64
MCVFDSFFPFIFC	64
MCDQRLGPYTPWFLC	64
MCIFDIFTPFILC	64
MCLFDLHLPFIPC	64
MCHTRANFYESWLLC	64
MCVFDLHCPFILC	102
MCLYDSFLPLIFC	90
MCVFDSILPFIIC	96
MCDTKPPYSEHWTPC	64
MCIFDLFCPSIVC	63
MCVFDLFLPFIFCGC	63
MCFFCFDRLSLCC	104
MCTFDTFPPFIFC	63
MCIFDLFLPFIIC	63
MCIRPLRYPFWFC	63
MCETWYYFEIAKHLC	63
MCIFDTWLPFIYC	63
MCLYDNLLPFIIC	63
MCVFDSFLPYIIC	63
MCIFDIFMPFVLC	63
MCYSCFSHLFLCC	116
MCIFVIHMPFIPC	91
MCVFDVFCPFTFC	63
MCIFDLFVPFTFC	62
MCIFDTILPFIFC	62
MCFFCFDRLFLCCGC	92
MCTFDLFIPFVIC	62
MCIFDNWLPFTFC	62
MCFSCFCRMFYCCGC	96
MCHTRANFYEPWIIC	62
MCFFDSFVPFIFC	62
MCVFVSFLPFIIC	62
MCETWYYFEIMKHLC	62
MCDTWYYFEITKHLC	61
MCSYCSNKLFLCC	104
MCDTKPPYSKHWTSC	61
MCHFDLFCPFIFC	61
MCHFWPNKLTAWLPC	61
MCVFDVFCPFVFC	61
MCHTRANYYEPWLLC	61
MCIRSLRYPFWCC	60
MCIFDIFMPFIRC	102
MCVFDSFLPFTFC	60
MCFFCFDRPFLCC	116
MCIFDTFLPFISC	98
MCDQRLSPYTPWVLC	60
MCEQRWPRSMLWFPC	60
MCEQRWPSSLLWFPC	60
MCDMKSTRFHPWVTC	60
MCYFDIFLPFIYC	60
MCHTRANFHEPWLLC	60
MCFFDLFFPFYPC	60
MCTFDTFLPSIFC	60
MCEQRWPRSLLGFPC	60
MCVFDIFIPFIPC	59
MCKTWYYFEITKHLC	59
MCLFDIFLPFITC	59
MCYFDIFLPFIIC	59
MCHNCFNKLFLCC	103
MCSFCFDRLFLCC	104
MCTTRRPLTHRWYPC	59
MCFSCFCRMFLCC	90
MCIFDLFSPFIPC	59
MCIFDLFLPFVPC	59
MCIFDLLVPFIFC	59
MCLFDTFCPFILC	59
MCETWYYIEITKHLC	59
MCHHRTNWFSPWLPC	59
MCVFDSFFLPFIIC	86
MCDQRLSPYSPWFLC	59
MCVYDLILPFIYC	59
MCCFDSFLPFIFFC	115
MCFYCFGALFLCC	87
MCIFDNWLPFVFC	58
MCDQRLSPYTPWFTC	58
MCHPTRLHLGLCCNC	58
MCRTRANFYEPWLPC	58
MCILDLFCPFIVC	58
MCLFDVFCDFIIC	58
MCETWYYFEITKHNC	58
MCAYDLFLPFIFC	58
MCLFDLFLPYVYC	58
MCFSCFCRTFYCC	93
MCDQRLSPYTPWYLC	58
MCHTRANIYEPWRLC	58
MCQQWNLYTRQWHIC	58
MCIFDTYLPFIFC	58
MCHTRANFYKPWLPC	58
MCTFDAFLPFIFC	105
MCFRSLKFPFWFC	58
MCHTRADFYEPWLLC	57
MCQQWSLYTRHWHIC	57
MCVFDLWLPFYYC	57
MCVFDLLLPFIFC	57
MCDTWTLYQRFCTPC	57
MCLFDSFLPFVLC	57
MCDTWALYQRFWTPC	57
MCLFDTFLPFTFC	57
MCIFDTFLPSIFC	57
MCFSCFCRMFFCC	57
MCFFRFDRLFLCC	101
MCRFDSFLPFIFC	99
MCQRYTKFHAYSC	57
MCVFDSWLPFVIC	57
MCFSCFAGLFYCC	87
MCHYCFNKIFLCC	84
MCEQRLPCSLLWFPC	57
MCIFDNWHPFIYC	57
MCFFDTFVPFIFC	57
MCFFCFDRLFLRC	100
MCVFDSFMPFIIC	57
MCLTRANFYEPWLLC	57
MCCFDSLLPFIFC	95
MCDTWTLYQRFWTSC	57
MCLYCFDALFLWC	56
MCFFDSFCPFIFC	83
MCFYCFNCLFIYC	56
MCFSCFCRMFYRC	95
MCVFDSLLPFIYC	56
MCIFDLHCPFIFC	56
MCFYCFCRMFYCC	110
MCTFDTFLPFISC	56
MCETWYYFEFTKHLC	56
MCYFCFSKLFLYC	56
MCVFDSSLPFIFC	56
MCRTRANFYEPWLLC	56
MCFFCFDRLFLFC	107
MCLFDLFYPFIPC	56
MCPYIYYPCLLLC	55
MCEYDLFLPFIFC	82
MCLFDTFVPFVFC	55
MCWSCFKSLFFCC	90
MCIFDLFAPFIIC	55
MCLFDLYLPFILC	55
MCQQWNLYTRHWYIC	55
MCLFDTLLPFIFC	55
MCETWYYFEITRHPC	55
MCVFDSFLPFVPC	55
MCSKCFNDLFYCC	92
MCEQRLSPYTPWFPC	55
MCIFDLFCLFIVC	55
MCCFDPFLPFIFC	101
MCIWDSFVPFIMC	55
MCVFDVFCPFIVC	109
MCLFDIFLPLIIC	55
MCHTRANFYEPWLYC	55
MCFYCFDSLFICC	54
MCVFDSCLPFIIC	54
MCQQWNLYTSHWHIC	54
MCFYDLFLPFIVC	54
MCVTWTLYQRFWTPC	54
MCLFDTFAPFIFC	54
MCHYCFHKLFLCC	94
MCFSCFCRMFYC	54
MCFSCFCRLFYCC	91
MCDFDLFLPFIFC	54
MCHTRANFYELWLLC	54
MCDTKPPYSKHWTTC	54
MCCFDLFLPFIFC	54
MCLFDLYCDFILC	85
MCQQWNLYTRYWHSC	99
MCVYDIFVPFMIC	54
MCFFDIFLPFIFC	54
MCDQRLSPYMPWFLC	54
MCFYDLFLPFVFC	54
MCHYCFSRLFLCC	93
MCLFDTFLPFVFC	54
MCGTWTLYQRFWTPC	54
MCFSRFCRMFYCC	90
MCVYDLFCPFIVC	54
MCFFDLFCPFIVC	53
MCLFDLFFPFILC	112
MCEQRWPRALLWFPC	53
MCTLDLFLPFIFC	93
MCLFDLYLPFIFC	53
MCDTWTLYQRYWTPC	53
MCIFNTFLPFIFC	53
MCLFDLFVPFILC	53
MCVFDSWLPFVLC	53
MCEQCWPRSLLWFPC	53
MCYFCFNKLFLCC	92
MCEQRWPCSLLWLPC	53
MCHYCFNKLFIYC	53
MCIFDLFSPFICC	53
MCHFDSFVPFIFC	84
MCTFDSFLPFIIC	53
MCETWYYFEITNHLC	53
MCLFDSLLPFILC	138
MCQQWNLYTRYWHTC	53
MCFSCFCRMFYWC	53
MCHTRANFYEPWLQC	53
MCLYDSFLLFIFC	53
MCRQWNLYTRHWHIC	52
MCCFDIFLPFTFC	52
MCVFDLFLPLIFC	52
MCIFYIHMPFIPC	52
MCIFDSWLPFIFC	52
MCIFDLFVPFIVC	52
MCEQRWPRSLLWCPC	52
MCIFDLFYPFIVC	52
MCVYDIHMPFIPC	52
MCHPTRIHLWLCCNC	52
MCATWYYFEITKHLC	52
MCVFDSHCPFIFC	52
MCEMRQSSFLPWTFC	52
MCETWFYFEITKHLC	52
MCVYDLLLPFIFC	52
MCVFDVLCPFIFC	52
MCFFCFDRLFPCC	52
MCHFRRNKFTAWLPC	51
MCLFDTFLPLIFC	51
MCLYDTFLPFIFC	51
MCFFCFDRLFLC	51
MCHFDPHFIFIPC	51
MCHYCINKLFLCC	81
MCDQRLSPYTPWSPC	51
MCSYCFDSLFLCC	93
MCQQWDLYTRHWHIC	51
MCETWYYFEITKQPC	51
MCDTWTLYQRFRTPC	51
MCFYDLFLPFTFC	51
MCDFRSHWTQQWQPC	51
MCDTWTLYQRCWTPC	51
MCFFCFDRLLLCC	98
MCVFGLFLPFIFC	51
MCIFDLHMPFIPC	51
MCEFDSFLPFIFC	51
MCEQRWPRSLLWIPC	51
MCQQWNLYTRHWLIC	51
MCCFDSFLPLIFC	84
MCDTWTLYQRIWTPC	51
MCDQRLSPYTPGFLC	51
MCERYTKFHAYFC	50
MCFFCLDRLFLCC	97
MCDTRANFYEPWLPC	50
MCFYCFSNLFLYC	77
MCIFDILMPFIPC	50
MCQRYTKVHAYFC	50
MCVFDSFLPLILC	50
MCETWYYFEITKYLC	50
MCDQRLSPCTPWFLC	50
MCIFGLFCPFIVC	50
MCIFDIHMPFMPC	50
MCIYDLFLPFIFC	50
MCTFDLFLPSIFC	50
MCLFDLHLPFICC	50
MCTFGLFLPFIFC	50
MCLFDIFCPFVLC	50
MCTFDTHLPFIIC	50
MCIFNNWLPFIYC	50
MCVFDIFMPFIPC	78
MCPFDTFLPFIFC	50
MCVYDLFLPFIVC	50
MCVFDCFLPFIIC	50
MCTRSLRYPFWFC	50
MCIFDTHFPFITC	50
MCLFDPFLPFILC	49
MCGYDIFVPFIIC	49
MCVYDLYLPFIYC	49
MCVFDLFFPFIFC	49
MCCFDNWLPFIYC	49
MCLFDIFFLPFIIC	49
MCFFDLFVPFIFC	49
MCDTWTLHQRFWTPC	49
MCVYDIFLPFIIC	78
MCCFDSSLPFIFC	95
MCLYDSFVPFIFC	108
MCITTLAQVIKAMLC	48
MCEMRQSSFSPWTSC	48
MCFYRFDSLFLCC	48
MCIYDIHMPFIPC	48
MCLHDSFLPFIFC	48
MCVYNIFVPFIIC	48
MCDQRLRPYTPWFLC	48
MCLTRANFYEPWLPC	48
MCVLDVFCPFIFC	48
MCIRSPRYPFWFC	48
MCYFCFSRLFLCC	92
MCVYDIFVPCIIC	48
MCLFDIFSPFIIC	48
MCHTRANFYEPWLLCC	47
MCILDIFMPFILC	47
MCVFDTFLPFIIC	47
MCVFDLFLLFIFC	47
MCTSDTFLPFIFC	47
MCDQRLSPYAPWFLC	47
MCFFDPFFLFIPC	47
MCLFDPFCPFIFC	81
MCTFDLFLSFIFC	46
MCFYDLFFPFIFC	46
MCHARANFYEPWLLC	46
MCIFDLFLPFILC	46
MCLFDLFFPLIIC	46
MCCYCFSALFLCC	46
MCDTKPPYSRHWTPC	91
MCLFDLFVPFIYC	46
MCVVDSFLPFIIC	46
MCIFDIFMPLILC	46
MCFSCFCRMSYCC	79
MCLFDLFVPFIIC	46
MCLFDLFLPFIIC	45
MCHFRPNKLIAWLPC	45
MCHTRANIYEPWLPC	73
MCVFDSLLPFILC	74
MCHFRPNKFTAWVPC	45
MCVYDLFMPFIYC	45
MCVYDIFMPFILC	45
MCIWDSFVPFICC	45
MCEQRWPRFLLWFPC	45
MCLFDTFVPLIFC	45
MCLFDSFFPFILC	45
MCLFDIFCPFTLC	45
MCQRWNLYTRHWHIC	45
MCIRSLRYPSWFC	44
MCFYCFSNLFLFC	44
MCIFDMHMPFIPC	44
MCTFDLFLPFISC	44
MCCSDSFLPFIFC	82
MCLFDVFCDFILC	44
MCEQRWPRSLLWFTC	44
MCCFDSFLPFIFCGC	44
MCIRSLRHPFWFC	44
MCVLDSFLPFIFC	44
MCLFDILLPFIIC	44
MCDQRLNPYTPWFLC	44
MCYFCFHHLFLYC	44
MCETWYYFEITKHVC	44
MCCFGSFLPFIFC	80
MCFSCFAGLFLCC	75
MCSTRYSKWQPWTPC	44
MCDTRANFYEPWLLC	44
MCFFCSDRLFLCC	76
MCCLDSFLPFIFC	86
MCIFDIFMPFIHC	43
MCIFDILMPFILC	43
MCHPTRLNLWLCCNC	43
MCFYCFDSLLLCC	83
MCHTRVNFYEPWLPC	43
MCLFDTFVPFIVC	43
MCCFDSFFPFIFC	43
MCTSDLFLPFIFC	43
MCVQRLSPYTPWFLC	43
MCHTRISYLWPWRPC	43
MCHTRADFYEPWLPC	43
MCIFDNWLPFIDC	43
MCLLDIFCPFILC	43
MCQRYTRFHAYFC	43
MCTFDIFLPFVLC	43
MCTWDSFVPFILC	43
MCETWYFFEITKHLC	43
MCLCDSFLPFIFC	43
MCFYCFDSLFLC	43
MCLYDSFLPFISC	43
MCETWYHFEITKHFC	43
MCHTRVNFYEPWLLC	43
MCVFDTFLPFIYC	43
MCHMRANFYEPWLLC	43
MCQRYTMFHAYFC	42
MCVCDLFLPFIYC	42
MCHFRPNKLTSWLPC	42
MCHFRPNKLTAWRPC	42
MCVFSMPILPFIAC	42
MCFFDLLLPFVYC	42
MCIFDLFRPFIVC	42
MCFYDLFLLFIFC	42
MCDTWTLYQQFWTPC	42
MCIFDNWLPFITC	42
MCTFDLFMPFIFC	42
MCLYDIFVPFIIC	42
MCIFGLFVPFIFC	42
MCLFDIFVPFIIC	42
MCETWYYFVITKHLC	42
MCETWYYFEITKRIC	42
MCLFDTFVPFTFC	42
MCLFDSLLPFICC	42
MCIFDTFLPFLFC	41
MCEMRPNRNAPWSAC	41
MCFYDSLLPFIFC	41
MCQMKPPYSDTWLEC	41
MCYFCFRHLFLCC	77
MCVFDAFFPFIIC	41
MCVYDIIVPFIIC	41
MCTFDTHFPFILC	41
MCEMRQSSFLPWTAC	41
MCDQRLSHYTPWFLC	41
MCLFDNWLPFIFC	41
MCCFDSFMPFIFC	41
MCHDCFNKLFLCC	70
MCHTHANFYEPWLLC	41
MCLFDLFYPLIIC	41
MCCFDSFPPFIFC	41
MCLYDSFFLPFIFC	41
MCVFDFFLPFIFC	41
MCYFDSFLPFIFC	67
MCVLDSFLPFVLC	41
MCVYDLSLPFIFC	41
MCTFDLFLLFIFC	41
MCFFCFDCLFLCC	41
MCVYDFFLPFIYC	41
MCPFTMVYTMLQC	41
MCFYDLFSPFIFC	41
MCVCDIFVPFIIC	41
MCIPCFKRLFLCC	69
MCLFDTHFPFILC	41
MCEHRHPSSLVWLPC	41
MCETWYCFEITKHLC	40
MCYSCFHHLFLCC	40
MCVFDSLLPFVLC	40
MCVFDSVLPFIIC	40
MCHPTRLHLWLCCTC	40
MCHTCANFYEPWLLC	40
MCVFDTFLPFILC	40
MCQMRDTPYSAWVLC	40
MCIFDIFMPFILCGC	40
MCFSCFCCMFYCC	40
MCEYWSIYTPRWQFC	40
MCFYDLFLPFIFCGC	40
MCSFCFNKLFLCC	68
MCDQHLSPYTPWFLC	40
MCHYCFSRLYLWC	40
MCHTRLPYSLTWTPC	40
MCVFDSSLPFVLC	40
MCHPTRLHLWLCSNC	40
MCSYCFKKLFLCC	69
MCFSWFCRMFYCC	67
MCHTRANYYEPWLPC	39
MCFFCFVRLFLCC	39
MCIFDNWLPCIYC	39
MCTFDLFCPFIFC	39
MCETWYYFEITKHTC	39
MCDILIYHYWLPC	76
MCLFDSFVPFTFC	39
MCICSLRYPFWFC	39
MCIFDSWLPFVYC	39
MCVYDLCLPFIYC	39
MCAFDSFLPFIFC	39
MCQQWNLYTRHWYSC	39
MCCFDSFSPFIFC	39
MCVFDLFYPFIIC	39
MCFSCFDSLFLCC	39
MCFFDNWLPFIFC	39
MCIFGIFMPFILC	39
MCIFNIHMPFIPC	39
MCLFDLFCPFVFC	39
MCFYCFDSSFLCC	39
MCVYDLFSPFIFC	39
MCFYCLDSLFLCC	39
MCFYDLFIPFIYC	39
MCEQRWPRSWLWFPC	39
MCIFDNWLPFINC	39
MCVYDLVLPFIYC	39
MCQQWNLCTRHWHIC	39
MCIFDLFCPFVVC	39
MCSTRYFRWQPWTPC	39
MCLRSLRYPFWFC	38
MCDQRLSPYTPRFPC	38
MCIFDSFLPFVYC	38
MCHTRANFYEPWLLCGSGC	38
MCLFDLFLPYIFC	38
MCETWYYFESTKHLC	38
MCHFRPNKLSAWLPC	38
MCVYDLFLPLIFC	38
MCIFDNWLPLIFC	38
MCQQWNLFTRHWHIC	38
MCLFDSFLPFIRC	69
MCIFDIHKPFIPC	38
MCLYDSFMPFIFC	38
MCLFDPFYPFIIC	38
MCHPTRLHLWLCCHC	38
MCLFDIFLPFVFC	38
MCAFDVFCPFIFC	38
MCVYDTFVPFIFC	38
MCHYFFNKLFLCC	67
MCLFDIFVPFIFC	38
MCVYDIFVPYIIC	38
MCIFDSFFPFVIC	38
MCVFDLFVPYILC	38
MCVYDIFVPVIIC	38
MCIFDSFFPFICC	38
MCSYCFNKLFLGC	38
MCTFDIFFLPFILC	38
MCQQWNLYTMHWHIC	38
MCLYDFFLPFIFC	38
MCVFDLHCPFICC	38
MCVFDSFFPFIPC	38
MCVFDVFCSFIFC	38
MCLFYRQDYVHPLRC	38
MCISDTFLPFIFC	37
MCIFVTFLPFIFC	37
MCVFDSLLPFIPC	37
MCIFDLFCPCIVC	37
MCIFDLFCPYIVC	37
MCLYDSILPFIFC	37
MCDQRLSPHTPWFPC	37
MCLYDSFLSFIFC	37
MCDTWTLYHRFWTPC	37
MCLFDISLPFIIC	37
MCIRSLRYPLWFC	37
MCQQCNLYTRHWHIC	37
MCCFDSFLPSIFC	37
MCEQRWQRSLLWFPC	37
MCVYDMFVPFIIC	37
MCIFDTVLPFIFC	37
MCLFDIFLPFIICGC	37
MCLFDTFYFFILC	37
MCDQRLSLYTPWFLC	37
MCHMRANFYEPWLPC	37
MCFYCFDSLSLCC	63
MCDTWTLYQWFWTPC	37
MCVYDLFLPFIFCGC	37
MCLFDIFLPFTIC	37
MCLFDTFLPFIFFC	37
MCLFDPFVPFIFC	67
MCHTCANFYEPWLPC	37
MCVYDIFVPIIIC	37
MCLFDTFIPFIFC	37
MCSYCFNKFFLCC	37
MCETWYYYEITKHLC	36
MCHFCFDFLFLYC	36
MCCFDSFLPFIVC	69
MCMYDLFLPFIFC	36
MCQQWNLYTGHWHIC	36
MCLFDIFLPFVIC	36
MCILDLFVPFIFC	36
MCIFDIFMPSILC	36
MCHTRANFYEPWRFC	36
MCVFDVFCPLIFC	36
MCHYCFNKRFLCC	36
MCHPTRLHLWLFCNC	36
MCHTWNWWNRTWHEC	36
MCQQWNLYIRHWHSC	36
MCVYDLFLPFIFFC	36
MCFFCFDSLFLCC	70
MCLLDIFLPFIIC	36
MCTFDLFAPFIYC	36
MCTFDTFLPFIFCGC	36
MCLFDSFLPFICC	36
MCHTWTLYQRFWTPC	36
MCLFDTFVSFIFC	36
MCIFDLFAPFILC	36
MCTTWYTFSLTSTPC	36
MCIFDNRLPFIFC	36
MCVNDLFLPFIYC	36
MCIFDNWFPFIYC	36
MCFFDIFMPFILC	36
MCIFDLFVPFIFFC	36
MCEQRWPRSLLLFPC	35
MCMFDSFLPFIFC	35
MCIFDNWLPFISC	35
MCHYSFNKLFLCC	35
MCLFDPFLSFILC	35
MCVFDTFIPFVLC	35
MCVYDLILPFIFC	35
MCCFDIFMPFILC	35
MCDTCTLYQRFWTPC	35
MCIFYNWLPFIYC	35
MCQMRDTPYGAWMPC	35
MCDQRLIPYTPWFLC	35
MCVFDLHCPFIPC	35
MCLFDSFLPFTLC	35
MCVFRPNKFTAWLPC	35
MCDVYYSPLHFWLPC	35
MCFYCFDSLFLCCGC	35
MCIRSLRYPFWSC	35
MCLLDSFLPFILC	35
MCTFDIFMPFIFC	35
MCEMWYYFEITKHLC	35
MCHYCFNQLFLCC	35
MCLYDSYLPFIFC	35
MCVFDSFLPFLIC	35
MCIFDNWLPFLYC	35
MCLFDSFLPFIHC	35
MCMFDLFCPFIIC	35
MCVFDVSCPFIFC	35
MCIRSLRYPFWVC	35
MCHTRANVYEPWLPC	35
MCLFGTFVPFIFC	34
MCHPTRLHLWLSCNC	34
MCFYDLFLPFVIC	34
MCPFDLFLPFIFC	34
MCVFDSFLPCIIC	34
MCIFDIHMPFVLC	34
MCTFDTHFPFIFC	34
MCPFDLFCPFIFC	34
MCQMRDTPYSAWMPC	34
MCLFDIFCPFIRC	34
MCIFDTCLPFIFC	34
MCHTRTNFYEPWLLC	34
MCDQRLSPDTPWFLC	34
MCSTRYFEWQPWTPC	34
MCHTRANFYEPWLCC	34
MCVYDIFVPFLIC	34
MCFYGLFLPFIFC	34
MCLYDLFIPFIFC	34
MCHFRPYKFTSWLPC	34
MCVFDLFFPFIIC	34
MCHTHANFYEPWLPC	34
MCQRYTKFHAYVC	34
MCHTRANFYEPCLPC	34
MCIRSLRYPFWFCGC	34
MCIRSFRYPFWFC	34
MCLFDTFLPFIVC	34
MCFYDLFLPFISC	34
MCVFDSFVPFIIC	34
MCMFDLFCPFVFC	34
MCAYCFNKLFLCC	34
MCVSCFCRMFYCC	66
MCVCDSFLPFIIC	34
MCEQRWPRTLLWFPC	34
MCDQRLSPYTPWFLCGSGC	34
MCIFDLFCPVIVC	33
MCHFRPNNFTSWLPC	33
MCQRYTKFHAYFCGC	33
MCLFDLFCPFTFC	33
MCVYDLYLPFIFC	33
MCEQRSPRSLLWFPC	33
MCEQRWPRSLLWFPCGSGC	33
MCQQRWPRSLLWFPC	33
MCETWYYFKITKHPC	33
MCHTRANFFEPWLLC	33
MCIFDSFFPFVLC	33
MCVFCFDRLFLCC	65
MCVWDSFVPFIFC	33
MCLFDIFLPFTFC	33
MCETWYYFEITKNLC	33
MCFYDLFLPLIFC	33
MCTFDFFLPFIFC	33
MCQQWNLYTRHCHIC	33
MCIFDYWLPFIYC	33
MCPFDSFVPFIFC	33
MCFYCFDPLFLCC	33
MCYFCFHHLLLCC	33
MCLFDLLVPFVFC	33
MCYFDCFLPFIFC	33
MCYSCFSALFYFC	33
MCSFDSFLPFILC	33
MCVFDSFMPFILC	33
MCLFDTLVPFIFC	33
MCIPCFRHLFLCC	59
MCYYCFDSLFLCC	33
MCVFDSFLPLVLC	33
MCVYCFCHHFLCC	61
MCLFDTSVPFIFC	33
MCIPCFKHLFICC	33
MCVYVIFVPFIIC	33
MCYFCSHHLFLCC	33
MCHFCFDFLFLFC	33
MCCFDFFLPFIFC	33
MCLFDLFFPFIVC	33
MCCFDIFLPFIFFC	33
MCLFDLFVPFAFC	32
MCIFELFFPFILC	32
MCIYDNWLPFIYC	32
MCIYCFDSLFLCC	32
MCVFDLYLPFIFC	32
MCVFDSFLPFIFCGC	32
MCVFDLFLPSIFC	32
MCLFDAFCDFIFC	32
MCILDNWLPFIFC	32
MCCFDIFLPFVFC	32
MCLFDLFVPFIPC	32
MCVFGSFLPFIFC	32
MCVYGLFLPFIFC	32
MCLFDLFLPYVCC	32
MCIFDIHLPFIPC	32
MCHTRANFCEPWLLC	32
MCVFDSFVPFVFC	32
MCQFDTFTFPFIPC	32
MCLFDVFCDFICC	32
MCLFDSLVPFIFC	32
MCVFDLFLSFIFC	32
MCVFDSFLPFIFFC	32
MCEQRWPRSLLWFHC	32
MCVFDVFCPFIFFC	32
MCSTRYFKWQPWAPC	32
MCHTRANFYVPWLPC	32
MCETWYHFEITKHPC	32
MCTFDIHMPFILC	32
MCCFDSFVPFIFC	32
MCFFCFDRLFLGC	32
MCIFDSFLPFIPC	31
MCCFDIFLPFIVC	31
MCQGFYDAFWFC	31
MCIFDSFLPFVLC	31
MCVYDLFLPFIDC	31
MCSCCFNKLFLCC	31
MCYFDIFLPFIPC	31
MCFFDPHLPFVFC	31
MCDTWTFYQRFWTPC	31
MCIFDIFCPFILC	31
MCVFDPFLPFVLC	31
MCIFGNWLPFIFC	31
MCNQRLSPYTPWFPC	31
MCCSCFDRLFYYC	31
MCFSCFWRMFYCC	31
MCEQRWPRSLLWFAC	31
MCDKRLSPYTPWFLC	31
MCQQWNLYTKHWHIC	31
MCHYCFCRMFYCC	31
MCHFRFNKFTAWLPC	31
MCSMRETRFHVWKDC	31
MCIPCFKHLFLFC	31
MCYSCFSALFYYC	31
MCIFDNWLPYIYC	31
MCVFDVFRPFIFC	31
MCSTRYFKWQPWTHC	31
MCHTRATFYEPWLLC	31
MCHFRPNKLTAWLLC	31
MCDHRLSPYTPWFPC	31
MCTFDSLLPFIYC	31
MCVFDLSLPFIFC	31
MCVFGVFCPFIFC	31
MCIFDVFCDFIFC	31
MCCFDSFLLFIFC	31
MCVFDSFSPFIFC	31
MCDTKSSRFHPWVPC	31
MCLFDILCPFILC	31
MCIIDIHMPFIPC	31
MCHTRINYLWPWQPC	31
MCVYNLFLPFIYC	31
MCLFDLYCDFICC	31
MCHTRANFYEPWHPC	30
MCDLRLSPYTPWFLC	30
MCHFRPNKFSAWFPC	30
MCQQWNLYTRYWHNC	30
MCHTRTNFYEPWLPC	30
MCQQRNLYTRHWHSC	30
MCIRSLRYPFRFC	30
MCETCYYFEITKHLC	30
MCFSCFSRMFYCC	30
MCVYCFDALFLCC	30
MCVYDFFVPFIIC	30
MCHPTRLPLWLCCNC	30
MCLYDSCLPFIFC	30
MCGQRLSPYTPWFPC	30
MCVFDSFLPFNIC	30
MCQQWNLYTRHWRMC	30
MCVYDLFWPFIYC	30
MCRFDIFLPFIFC	30
MCFYCFDSLFIFC	30
MCVSDLFLPFIFC	30
MCVFDSFLPFALC	30
MCLFDLFYPFVIC	30
MCIFDNWPPFIFC	30
MCVFDPFLPFILC	30
MCSYCFNKLFRCC	30
MCVFDSFLHFIIC	30
MCVFDVFCLFIFC	30
MCIFDLFCPFICC	30
MCCFDPHFIFIPC	58
MCHYCFNKLILCC	30
MCLFDLSVPFVFC	30
MCFFDVFCPFIFC	30
MCQQWNLYTRHWHCC	30
MCVFDIFIPFVYC	30
MCVFYSFLPFIIC	30
MCIFDIFMPFILCC	30
MCVFDSFSPFILC	30
MCYFDIFLPFILC	30
MCQRYTKSHAYFC	30
MCIFDTFLPYIFC	30
MCTFGMNQGFYWLLC	30
MCVFDLFCLLFFC	30
MCLFDSSLPFILC	30
MCLFDIFRPFILC	30
MCLFDSHLPFIFC	30
MCVFDLFMPFIFC	29
MCVFDIFIPFVRC	29
MCLFDIFLLFIIC	29
MCVYDLFLPFISC	29
MCHPTRLHLWLCFNC	29
MCVFDSFLPSVLC	29
MCEHRRPPSLVWLPC	29
MCFYDLLLPFIFC	29
MCDQRLSPYTLWFPC	29
MCHFDIFLPFIFC	29
MCAFDSFLPFVLC	29
MCTFDVFLPFTFC	29
MCVYDLFLPFVIC	29
MCISDLFCPFIVC	29
MCDTLTLYQRFWTPC	29
MCPFDIFCPFILC	29
MCFYCFDSLFPCC	55
MCIFDLFLPFVYC	29
MCLFDSFAPFIFC	29
MCCFDILLPFIFC	29
MCIFDVFMPFILC	29
MCIFDLFLPFIPC	29
MCIFDLSVPFIFC	29
MCLFDIFFPFVLC	29
MCHPNRLHLWLCCNC	29
MCDQRRSPYTPWFLC	29
MCIFDIHMPYIPC	29
MCHYCFNTLFLCC	29
MCVFDSFCPFILC	29
MCSMRGPNQYRWIPC	29
MCIFDLFVPLIFC	29
MCAFDSFLPFILC	29
MCIFELNLPFILC	29
MCVHDLFLPFIFC	29
MCYTWTLYQRFWTPC	29
MCCYDSFLPFIFC	29
MCIFDLIVPFIFC	29
MCVFDLYLPFIMC	29
MCLFDTFVLFIFC	29
MCDMRRPFSRVWTMC	29
MCDQRFSPYTPWFPC	29
MCQQWYLYTRHWHIC	29
MCFFCFDRLFRCC	29
MCHFRPNKLTAWPPC	29
MCHPSRLHLWLCCNC	29
MCIFDISMPFILC	29
MCLFDSFVPFIFFC	28
MCEQRWPCSLLWFLC	28
MCIRSIRYPFWFC	28
MCVYDLFLPFINC	28
MCETWYYFELTKHLC	28
MCQQWNLYTRHWHHC	28
MCETWNYFEITKHLC	28
MCDAWTLYQRFWTPC	28
MCFYCSDSLFLCC	28
MCIRSLRYPFWIC	28
MCVYDSFLPFVLC	28
MCQTRANFYEPWLPC	28
MCAFDLFLPFTFC	28
MCFFDPFFFFIPC	54
MCPFDIFLPFIFC	28
MCLFDSFIPFIFC	28
MCLQWNLYTRHWHIC	28
MCVFDLFLPLTFC	28
MCHFRSNKFTAWFPC	28
MCIFDLFVPFIFCGC	28
MCLFDIFLSFIIC	28
MCVFDSFLPFFIC	28
MCVFDLFCPFVIC	28
MCLFDPMLTFIPC	28
MCFYDLSLPFIFC	28
MCCFDIFVPFIIC	28
MCTFDLFIPFIFC	28
MCDTKPPYSKHWAPC	28
MCYSCFSGLFYCC	28
MCMFDIHMPFIPC	28
MCIIDNWLPFIYC	28
MCVFDSYLPFIFC	28
MCIFDLWLPFIPC	28
MCYFCFHHLFLFC	28
MCVFDSFLPFIIFC	28
MCIFDLFCPFIVCGC	28
MCIFDTFVPFIIC	28
MCSYCFNKLYLCC	28
MCSYDLFLPFIFC	28
MCLFGSFVPFIFC	28
MCIFDIHMPFSPC	28
MCHYCFNKLFVCC	28
MCIFDNWLPIIYC	28
MCFFDSFFPFIPC	28
MCVYDLFLPYIYC	27
MCDQRLSPFTPWFLC	27
MCETKRKNDLYWQPC	27
MCDSWTLYQRFWTPC	27
MCIFDNCLPFIFC	27
MCYYCFSRLYLCC	27
MCYYCFHHLFLCC	27
MCTFDTILPFIFC	27
MCDRRLSPYTPWFPC	27
MCFFWFDRLFLCC	27
MCTFDSWLPYIPC	27
MCDQRLSPYTPWCPC	27
MCLFDTFVPFIFFC	27
MCLFDLFMPFVFC	27
MCIFDIFMSFILC	27
MCPPTRLHLWLCCNC	27
MCYFDPHFIFIHC	27
[truncated: 58 more rows]

## Sheet: NNK_FGF-R4_X_FGF-R1C
Sequence	FGFR4_X_FGFR1C_reads_R5
MCIYRLSDFWVVC	786361
MCTRTSFYGFWYYAC	208379
MCFRWRLFHHLTPFC	71836
MCIYRLSDFWVMC	28430
MCNIILYKIMKNRC	29807
MCMARQIQYYRLWMC	21202
MCIYRLSDFWAVC	22015
MCTRTNFYGFWYYAC	30075
MCVWPKWLTKFILRC	15657
MCRLCFSKLFWCC	23306
MCHDRHLIYYMIMC	11198
MCTRTSFYGFWYHAC	16572
MCMRHLQYFRIMRCC	10637
MCLYRLSDFWVVC	9824
MCEPWITIYKVLKKC	8638
MCYAKLWYQYQKLIC	9232
MCVYRLSDFWVVC	10698
MCKHHLQYYRIWRLC	11143
MCSNMWKLANRWWVC	13143
MCRHTQYYRIMRSKC	7764
MCCYRCWSLFWCC	12208
MCHVMYYRIMKSLAC	7054
MCPVLIYKLWRTC	9652
MCIYRLSDFWVAC	6493
MCIYRLSDLWVVC	7099
MCPKYFLLWRLMTC	4753
MCTYRLSDFWVVC	6085
MCFRWRLFHHLTPYC	5787
MCLPRMIRYYQINYC	3802
MCFRWRLCHHLTPFC	3915
MCNEVKYFLLWKQNC	3851
MCSILLYKVLSRC	3633
MCLISIYKVLKHC	3592
MCAKWFVLYRQMMC	2899
MCPKWLLKWFLAC	4394
MCTRITQYYRLWKKC	2683
MCNRITIYKVLRRC	3769
MCSRTSFYGFWYYAC	4258
MCIKMFLAHKRFC	2549
MCIYRLSDFWIVC	2790
MCIYRLSDFWVLC	4563
MCVVCYKVWRHTLRC	2276
MCTRTSFYGFWYYTC	4071
MCMAKRLVSYWKAYC	2215
MCHKLILLYKVARKC	1718
MCYNNLVVKWLLFC	1980
MCIYRLSDFWVVCGC	2548
MCPRRVLQYYRLWNC	1811
MCHRFVAWYRIWHRC	2148
MCPLRIVAYYRAYKC	1545
MCIYRLPDFWVVC	2011
MCIHRLSDFWVVC	2056
MCSNMWKLANRWWAC	2196
MCIYRSSDFWVVC	1907
MCVWPKWLTKFILQC	1398
MCSKWVQYYRVIRHC	1648
MCTRTSFYGFWYYDC	2103
MCPRRVLQYYRLWKC	1395
MCIYRLSDSWVVC	1928
MCDVLLYKLFRYC	1660
MCMRTIQMYRIYRC	2113
MCIYRLSDFCVVC	2031
MCTRTSFYGFRYYAC	3162
MCIYRLSDFLVVC	1941
MCIYRLSDFRVVC	2130
MCTRTSFYGFWYYVC	2859
MCYVTWYKVTKKLC	1880
MCIYRLSDVWVVC	1692
MCIYRLSDFWAMC	1360
MCWITLYKVLHAC	1327
MCAKYFMLWRQFAC	1240
MCTWRHVDYSFHYVC	1494
MCIYRLSNFWVVC	1605
MCDVLLYKLMLQWAC	1629
MCNVTIWKVLRLC	1160
MCPLHMRRGMAMFVC	1479
MCMARQIQYYRLWKC	1052
MCKATWEVVLYKLMC	1049
MCIYRLSGFWVVC	1429
MCYATYWFQMQYKKC	1055
MCYLVKHRDFSRHVC	1287
MCHYCFNKLFLCC	2138
MCVKYFTLWKNWC	987
MCMRHLQYFRIMRRC	1498
MCDRHLYYYLAMHKC	938
MCFYRLSDFWVVC	1231
MCYAKLWYQYQKLMC	897
MCNVIVYKVLKKIC	1065
MCARTSFYGFWYYAC	2235
MCIYRLSDFWVIC	1472
MCIYRLSEFWVVC	1156
MCIYRLSDCWVVC	1120
MCRLCFNKLFWCC	1637
MCHSNLIIKWLLSC	1184
MCIYRLSDYWVVC	1128
MCMARQIQYYRLWRC	774
MCGWPSWIYKYLRTC	1107
MCMRHLQYFRIMRSC	1090
MCNILLYKILSVC	1006
MCPYSITFYKVFRHC	885
MCSRYVTFYRAFLSC	1321
MCSIILYKIMKNRC	1008
MCIYRLSDFWVEC	842
MCDCHPLLCFLLC	1100
MCFSPSVVKYYLAFC	844
MCMARQIQYYRLWIC	1223
MCIYHLSDFWVVC	911
MCYWPTWYRLMSKKC	650
MCPRWIYYYMLHC	758
MCAKMFLRYWQIMCC	898
MCIYRLLDFWVVC	878
MCIYCLSDFWVVC	876
MCNNYIIFYKIMKC	663
MCFVYPRRQPLYWIC	908
MCSITIYKLLRFC	685
MCWPRAIVYYKLFRC	832
MCCFKFRDLFWVC	957
MCPVRQYYWLLFC	671
MCHVMYYRIMKSLVC	610
MCWPSIVVKAMLRC	727
MCHVMYYRIMKSLTC	616
MCDKCVTFWKAWMYC	680
MCIYRLSDFWFVC	776
MCPRYFWYHYLLC	738
MCVKCWLAYIRTC	603
MCDVLVYKVLWAC	597
MCRNLVVYWRAFYC	662
MCIYRLSDFWGVC	906
MCFWHKRSDFWLQFC	524
MCQFYLAMVAKIRC	758
MCRHTQYYRIMRSMC	533
MCNIILYKIMKNHC	594
MCNWIQYYKIMVRKC	526
MCKRTSFYGFWYYAC	893
MCTKRMLLYYLVHMC	610
MCTNRKLVWLYKVAC	770
MCIYRLSDFWVGC	962
MCKYETMWYQYMYKC	477
MCTRTSFYGYWYYAC	1236
MCICRLSDFWVVC	606
MCPSWLIKLCLWNRC	737
MCTLTSFYGFWYYAC	663
MCTRTCFYGFWYYAC	1073
MCPKWFILWRQLC	666
MCKWHILLYQIHNRC	639
MCIYRLTDFWVVC	637
MCTRTNFYGFWYYTC	699
MCMVTLYKLLSALC	587
MCNKHLYYYLLFKHC	459
MCIYRLSDIWVVC	582
MCQFRFSKFWLSC	457
MCEFYRAMQRRLQC	482
MCFVTLYKLLKCC	536
MCTRTCFYGFWYHAC	652
MCKAVIDLYIAYKTC	427
MCPVIIYKILSHC	503
MCFRWRLSHHLTPFC	659
MCMYRLSDFWVVC	602
MCRWDVTLYKLFRMC	433
MCFRWRLLHHLTPFC	967
MCLRWRLFHHLTPFC	688
MCRTLSFYLAWHQNC	454
MCTKKTLLYYMLTCC	579
MCIFRLSDFWVVC	534
MCMRHLQYFRIMRWC	401
MCVTLYRAYCSQWVC	410
MCNIILYKIMKNPC	438
MCEITLFKLLHSLC	518
MCDIILYKIMKNRC	494
MCPICLYKIMYLC	371
MCHCFPTICWLVC	367
MCVKYYLIMKSLC	362
MCTRASFYGFWYYAC	733
MCFRVMPQFYVIC	384
MCAPKWLIKVLLC	349
MCFRWRLFRHLTPFC	517
MCIYRLSDFGVVC	472
MCIYRWSDFWVVC	451
MCLYRLSDFWVMC	338
MCVYRLSDFWVMC	336
MCSISCFYHLMFC	384
MCDWAMVRWYRMYC	395
MCYKRMLQYYKVHRC	497
MCLACLYKVLKMC	331
MCIYRLSDFWDVC	511
MCSCFPPLCFLIC	367
MCHFRPNKFTAWLPC	448
MCTRTSFYGFWYYEC	331
MCTRTSFYGLWYYAC	1273
MCPKYFLLWRLMMC	313
MCIYRLSYFWVVC	429
MCRYYHRWLICHC	376
MCRTMDVIVFKLMYC	365
MCMRTSFYGFWYYAC	839
MCIYRLADFWVVC	432
MCPVLLWKILYMC	305
MCRVYPVKCYIVFC	347
MCYKWPIRSHLYWLC	344
MCNYRLSDFWVVC	386
MCNNITIYKIMKLC	375
MCIYRLSDFWVTC	322
MCSKWVQYYRVIRRC	424
MCTQTSFYGFWYYAC	685
MCYRLYFRRHRAPFC	356
MCFTRHPFARKWISC	286
MCVYRLSDFWAVC	301
MCDCLHVVCFLVC	298
MCNHRFPYFTRFWYC	349
MCKKHLLYYLIAC	449
MCCKRDIIYWLLMKC	281
MCYKLFLLWKQCC	386
MCYGQRMTLLTRLLC	363
MCDRHLYYYLAMHMC	279
MCPILIYKVLFKC	274
MCHCFPLLCSFLC	357
MCLISIYKVLKQC	286
MCNEVKYFLLWKQKC	271
MCIYWDLWYKMNRRC	382
MCKYLSYWRAWKSRC	357
MCYEILIYKIQKTHC	307
MCIYRLSDFWVFC	404
MCTCYPLLCWLLC	358
MCTRTNFYGFWYYDC	298
MCYWRLWCMLKPSKC	261
MCTRTSFHGFWYYAC	714
MCYYNINSGVIVYC	260
MCRFIIKAFLNLC	336
MCSRHLLYYMIYC	285
MCMARQIQYYRLWTC	252
MCNEVKYFLLWKQYC	290
MCFRWRLFHHLAPFC	369
MCYLRWTQYYRALHC	302
MCFHIKANYGFVRVC	249
MCIYRFSDFWVVC	394
MCTGIFCFTRFFLC	256
MCFCVVPGFYTLC	243
MCPKYFLLWRLMKC	243
MCTRTNFYGFWYYVC	414
MCRNISYYLAWHKKC	240
MCFASLWYRVQCC	300
MCKHHLQYYRIWRRC	326
MCKRLVLYYKLFC	277
MCTCTFDRYLPRLHC	270
MCDSFAILYYKINC	262
MCHPTRLHLWLCCNC	338
MCTRTSFYGFWDYAC	589
MCIYRLSVFWVVC	284
MCFPTFIIKSFLLC	245
MCPLYMRLGLAVNLC	226
MCRLCFSRLFWCC	403
MCTYLAYYLSFHRC	355
MCIYRVSDFWVVC	301
MCIRYARYPFWFC	308
MCPKWLLKWFLTC	279
MCSKWVQYYRVIRQC	217
MCRHTQYYRIMRSRC	217
MCIYRLSDFWALC	301
MCSYRLSDFWVVC	250
MCCFKFRDLFWIC	369
MCMARQIQYYRLWLC	240
MCSCAPVLCFLLC	266
MCKRTLLYWLMFC	250
MCYYWTYIYEKQQTC	212
MCPNMWKLANRWWVC	299
MCHCFPLLCHLFC	244
MCMRTMHVLMWKTTC	220
MCLERKLLLYYKLFC	246
MCPVLIYKLWRIC	233
MCDIVIYKILRSLC	204
MCHVQYYRAFLSTHC	239
MCMKTFQYWRIWHRC	202
MCTRTSLYGFWYYAC	798
MCPIIAYKVLFMC	202
MCTKRMLLYYLVHKC	201
MCLRMLEMYLVHARC	200
MCNIILYKIMKSRC	249
MCINRLSDFWVVC	254
MCTWRHVDYSFHYDC	222
MCPRRVLQYYRLWIC	214
MCPVTLYKILQLCC	254
MCTRTSFYGFWHYAC	475
MCRYTQYYRIMRSKC	193
MCTRTSSYGFWYYAC	525
MCPRYVLYYKLFHHC	193
MCIYRMSDFWVVC	259
MCTRTSFYGSWYYAC	516
MCNFYRWMLRRINC	226
MCEPWITIYKVLRKC	258
MCNIILYKIMRNRC	253
MCPNAIIFYKVMCC	280
MCNEVKYFLLWKQSC	227
MCSKSCVFYHLLFC	218
MCNITLYKIMKNRC	256
MCHITIYKILRSC	318
MCSILLYKVLSQC	183
MCTRMSFYGFWYYAC	426
MCYRNLVAYYKAAIC	204
MCMLVKHVLLYKSMC	182
MCIAIYKLMKMHC	225
MCTDLYYYLIWQRYC	182
MCIYRLSDLLVVC	238
MCMARQIQYYRLWVC	182
MCIYRLSDLWVMC	208
MCYCMKPVCWLIC	207
MCIYRLSAFWVVC	214
MCRDFWHLWFRVC	178
MCTKRMLLYYLVHRC	178
MCNRHEVKYWLVFKC	177
MCSRWRLFHHLTPFC	247
MCIYRLSDFWLVC	198
MCRYLTYYLHMRTHC	205
MCKRHILYWKLWHVC	172
MCFRWQLFHHLTPFC	268
MCTRTGFYGFWYYAC	435
MCSYCFNKLFLCC	311
MCYNVHWYRWIRRRC	168
MCHNRHLIYYMIMC	168
MCSNMWKLANRWWIC	189
MCTPHILIYKIMYC	198
MCTRTSFYGFLYYAC	398
MCLVSIYKIMRTC	167
MCCYNLFSLFWAC	299
MCPERLFYWLLVC	166
MCPKWLIKMLLNC	204
MCHGRHLIYYMIMC	164
MCMRHILYYLLCC	209
MCEREFLYSYLLQFC	164
MCDVLLYKLMLQWTC	224
MCSKYPVFCYLLWC	162
MCLYRLSDLWVVC	207
MCHLCFSKLFWCC	335
MCNDLFYYLLWRKAC	160
MCYTKCFWCRHWSTC	160
MCIYSLSDFWVVC	210
MCYKNVKNGLFVYC	157
MCYVQYYRIYRSRGC	157
MCHCFPIVCWFEC	155
MCQLVFSRYFLKC	154
MCKRHLFYWQLVHKC	152
MCISRLSDFWVVC	178
MCTRTSFYGFWYHDC	166
MCMKTLQYWRIWHRC	261
MCKRLLYYWLTYKRC	179
MCEFYRAMQRRLHC	179
MCLAYYRSFCTFGVC	150
MCIACWKVWKWSLC	150
MCIYRLSDFWIMC	149
MCTRTSFYGFWYCAC	361
MCNATWYLAMYRAFC	167
MCLTYYLLFRKMMHC	174
MCVWPKWLTKLILRC	187
MCSSMWKLANRWWVC	193
MCYVTWYKVTKKRC	199
MCTRTSFYGFWCYAC	352
MCSRFTPFHHWYC	186
MCYEVLWYKLQRKHC	146
MCKRHLQYYRIWRLC	216
MCTRTSFYGFCYYAC	466
MCQLTYTKFWLRC	185
MCTRTSFYGFGYYAC	311
MCHVRYWQVWKRC	167
MCDVLLYKLMLQWDC	158
MCMQRAIRYYMLYMC	143
MCTRTSFYSFWYYAC	376
MCVTNAKFFSHLAC	143
MCVKYFTLWKNCC	211
MCRWVHYWQIMRKIC	160
MCIKMFLAHKRLC	195
MCDCVWPLCWMTC	199
MCEPWITIYKVLKNC	206
MCFHPAIVKAFLLCC	207
MCIRWRLFHHLTPFC	188
MCPRTSFYGFWYYAC	349
MCTRTNFYGFWYHAC	330
MCVLYMFARYRC	180
MCTYRLSDFWVMC	137
MCLSNIVLWKVLYC	149
MCYAKLWYQYQKLTC	197
MCTRTSFYDFWYYAC	382
MCNIILYKIMKDRC	168
MCQFKRTLQYYKAWC	134
MCPNLFLAYYLAFC	155
MCPVLIYKLWRMC	134
MCFVYPRRQPLFWIC	180
MCFRWRLFHHFTPFC	218
MCRLCFGKLFWCC	194
MCLTQLYRFAIYC	152
MCHNYHLLYYLINC	149
MCDHKRHLVYYLLFC	131
MCATQLAWFGLYNIC	131
MCYRWRLFHHLTPFC	181
MCYRLIRYWQLVQKC	130
MCYSKLILKAFLLC	179
MCIKMFLAHKRYC	148
MCKYSKDLWLYRLWC	129
MCKWSDLIIKAFVLC	129
MCNALLYKIMHTQKC	129
MCNTLCFYTILFC	147
MCTRTSFYGFWYHTC	185
MCWWFMPELVLMC	127
MCDTNFNRWGLWWIC	126
MCVVCYKVWRHTLQC	126
MCIYRLSDLWAVC	143
MCFRWRLFHHLTPLC	320
MCTRTSFYGFWYHVC	242
MCNVIVYKVLKKMC	123
MCERWITIWKVSRHC	137
MCIDRLSDFWVVC	134
MCTRTSYYGFWYYAC	323
MCFRWRLFYHLTPFC	161
MCWITLYKVLHTC	120
MCRRFEVLLFKIAC	120
MCVWPKWLTKFILPC	152
MCIGKWYTYQYWTRC	181
MCTRTSFCGFWYYAC	340
MCTRMVTFYKVLC	179
MCMAKRLVSYWKAFC	119
MCIHLAYYKLFHKQC	119
MCWWTKNHIFWNKKC	119
MCTRTSFYGCWYYAC	270
MCVWPKWLTKFILWC	118
MCVWPKWLTKFILLC	135
MCYKCFTGLFLCC	199
MCYHSLTTHIMIYC	137
MCARTNFYGFWYYAC	207
MCFRWRLFHHLTPSC	167
MCKHHLQYYRIWRHC	117
MCTRTSFYGFWYYSC	336
MCTRSSFYGFWYYAC	272
MCSCFPLVCWLSC	117
MCLTYYLLHQRRLHC	117
MCWVKYWTVYKQC	117
MCEYHNWFEYKYRYC	117
MCYNKFITLYKVLYC	116
MCCFKYRDLFWVC	164
MCFRWRLFHHSTPFC	159
MCMRMIQMYRIYRC	152
MCITPPFRLWFVC	166
MCVRCFDQLFWCC	149
MCPRRVLQYYRLWYC	114
MCKEILYYKIWKRWC	114
MCFVCFRHSFLCC	200
MCWPLLYKILSFC	130
MCNIIPYKIMKNRC	144
MCSCYPVLCFLLC	151
MCARITQYYRLWKKC	112
MCYEKLWYVLMRRVC	112
MCRRFITYYMLTRKC	112
MCLKYVQFYRALHKC	112
MCILLYKVLRGCC	131
MCLALLYKIFSHC	111
MCRLCFRKLFWCC	221
MCPEKWVKYYLVALC	110
MCIYRLSDLCVVC	142
MCKHLFYYKLIRKAC	110
MCNIILYKVMKNRC	140
MCFRRRLFHHLTPFC	166
MCHVMYYRIMRSLAC	110
MCFRWWLFHHLTPFC	166
MCCTRFVNLFWLC	203
MCRHTQYYRIMRSNC	160
MCKRHITYWKLWHFC	108
MCKRFITYWKLFHKC	108
MCTRTRFYGFWYYAC	609
MCARTSFYGFWYHAC	185
MCNIILYKITKNRC	137
MCPDWLIKFYLMC	106
MCTRTNFYGFRYYAC	214
MCKHLYYYLLVKKHC	105
MCMKKKHIMIYRATC	105
MCRCLHYWKLWNRRC	128
MCHYITYYKLMMALC	124
MCEFYRAMQRRLKC	104
MCHYSWNIYQHVWQC	104
MCHDRHLIYYMITC	104
MCLNMWKLANRWWVC	130
MCPVIIYKILSRC	129
MCIYRLSDFWGMC	102
MCKIWYIEHQFYWVC	102
MCEPWITIYKVLKMC	102
MCPVLIYKLWRNC	102
MCNVTIWKVLRMC	102
MCAWPKWLTKFILRC	119
MCMVTLYKLLSAHC	102
MCPYSITFYKVFRQC	101
MCPERLFYWLLMC	101
MCPNPTLFYYLLWC	101
MCEPWITIYKVLKRC	101
MCIWPKWLTKFILRC	116
MCTHIQFYRSMMRSC	101
MCPVLIYKLWRAC	116
MCHNKLLTYYLVFC	100
MCAKYFMLWRQFVC	100
MCLCFSGMLVYHC	99
MCVTWYKVTKLRC	99
MCKRMTYYYLLFC	98
MCFRWRLIHHLTPFC	132
MCSALLYKIFARC	111
MCLYDFVGSDLFIYC	129
MCFRWRPFHHLTPFC	131
MCNRITIYKVLRHC	117
MCFRWRLFHYLTPFC	135
MCFHCFASRFWCC	150
MCTRTSFYGFQYYAC	140
MCFKLALLWEQCC	123
MCWITLYKVLHMC	95
MCRMACYYALYMQRC	122
MCVTLYRAYCSQWMC	94
MCTWTSFYGFWYYAC	199
MCKRAVLYYLIHRHC	93
MCLYRLSDFWAVC	93
MCAKYFYIWATCC	129
MCRDLFYYLLFRC	110
MCTARQIQYYRLWMC	91
MCHLLFYRVWRAC	140
MCKRMIKYWMMYC	116
MCMARQIQHYRLWMC	91
MCHLAYYLAFRSC	149
MCWILYYKLFKKKKC	90
MCKQRLLVYYLAHIC	105
MCRHHLLYYLIFC	89
MCMARQIQYYRLRMC	89
MCIKMFLAHKRIC	89
MCLIPKLFHLWRTNC	105
MCWWFRNHKFWQQIC	88
MCVKYWLAMARTC	102
MCRHVLYFRIMSTC	88
MCNRWITYYQVAHAC	146
MCFRWRLFHRLTPFC	131
MCHVMYYRIMKSLEC	87
MCPRWLIKLVLSC	86
MCCTLCFECFYCC	114
MCREVFYYQLIHRLC	86
MCYAKLWYQYQKRIC	112
MCERLVMLYRSWLFC	111
MCWYCFRKSFWCC	160
MCKRHVLYYLLFKHC	86
MCDVLLYKLLRYC	99
MCLISIYKVLKRC	121
MCYRHPHSNPLFWAC	85
MCFKHPWFFAWLC	85
MCFRWRLYHHLTPFC	85
MCSVLAYKVMVMC	84
MCNIILYKTMKNRC	107
MCPYSITFYKVFRRC	109
MCTRTSIYGFWYYAC	215
MCHFYSIMMRKIRPC	145
MCHMKYWMLVRRHIC	82
MCSVLLYRVLRFC	101
MCNTILYKIMKNRC	104
MCNWPLYYYRIYKHC	82
MCTFDRLAPRLYC	96
MCYVTWYKVTKKHC	81
MCKRLITYYRLFC	94
MCFWPVYYTIMCC	113
MCVWPKWLTKFTLRC	80
MCRELLYYLLQRC	80
MCFRWRLVHHLTPFC	98
MCRHIQYYRIMRSKC	79
MCMRHLQYYRIMRCC	96
MCWKFIWSLRSHC	78
MCSFAPLVWKYFLHC	78
MCNIILHKIMKNRC	92
MCRSCFSKLFWCC	148
MCSVLLYKVLC	78
MCTVWIFCVKSRSC	78
MCAVLWYKVSRRC	78
MCFSWRLFHHLTPFC	109
MCCYRLSDFWVVC	77
MCIKTFLLWRSSC	137
MCEVWYFDGHFYWVC	77
MCAWLTKWFIHQC	77
MCTKFPWPFPIFWAC	77
MCRTLSFYLAWHQKC	77
MCTRTSFDGFWYYAC	191
MCQREVTYWRYWKLC	92
MCAYWVRDVLYLC	76
MCKHIMLYKAAYC	76
MCQWKKQLLYYLIQC	76
MCHDYIVFYKVLRHC	76
MCIYRLSDFWVVCGSGC	76
MCTRTNFYGLWYYAC	120
MCIYRLSELWVVC	75
MCVVYYRIMWSRC	93
MCMTNVIASAALKWC	75
MCTRTSCYGFWYYAC	200
MCPKYVLFYKIFKHC	75
MCIYRLSDFLVLC	75
MCHRHLVYYLHHLRC	75
MCVRCFDRLFWCC	131
MCPWPMWLTKWVC	94
MCTRTSFNGFWYYAC	175
MCTWPAFLQKIFLFC	93
MCQFTYSKFFFC	73
MCVWPKRLTKFILRC	93
MCVWPKWLTKFILHC	116
MCDNRRWVRYYQIFC	73
MCHLFYYKLIHRKWC	73
MCTYRLSDFWAVC	73
MCWPEWLKKYVIINC	73
MCNRHLVYYKLWHQC	73
MCMRHLQYFRIMRYC	72
MCDFKRDLLYYFLWC	72
MCGVLLYKVMRVC	72
MCPYRLSDFWVVC	72
MCNVTIWKVLRSC	72
MCENKKVLFYYLLWC	72
MCRLCFSELFWCC	96
MCIYRLSDFWVDC	141
MCIYRLSDFWVKC	71
MCWPRFLTKYVLSLC	88
MCFRCRLFHHLTPFC	71
MCRHLAYWKLWHRNC	71
MCFRWRLCHHLTPYC	71
MCTRTSFFGFWYYAC	170
MCNIILYKIMKNCC	92
MCIYRLSDFWAAC	70
MCAVLAFKVASTC	83
MCHNKYLYYYLLYSC	70
MCERFVTYYKLFC	83
MCYAKLWYQYQRLIC	82
MCARWITYYRLYC	69
MCFRWRLFHQLTPFC	69
MCNIILYRIMKNRC	89
MCIYRSSDFWVMC	69
MCKFKRDLYFYRLWC	69
MCMARQVQYYRLWMC	69
MCDIYRFMRYTC	82
MCVRWPNLNALFWLC	68
MCYNNLVVKWLLYC	68
MCMARQTQYYRLWMC	68
MCNVILYKIMKNRC	91
MCYAKLWYQYQKLVC	68
MCNRITIYKVLRPC	68
MCAKWFVLYRQMKC	68
MCQLLAVTYWRAWSC	67
MCNIILYKIMKNLC	67
MCVTLYRAYCSQWAC	67
MCRHHLQYYRIWRLC	67
MCVTYYKILRKLLC	67
MCTRPSFYGFWYYAC	151
MCIYRLSDFCAVC	67
MCIYRLSDFCVLC	67
MCFKDAFYSYRYYNC	67
MCHRWEVVKWFLRFC	85
MCWITLYKVLHVC	66
MCIAYYRAYLSKPVC	66
MCVWPRWLTKFILRC	79
MCYVCFSHSFICC	106
MCIAIYKLMKMQC	66
MCILWYKLVKQKC	66
MCYNVLWYQVIRRHC	66
MCVWPKWLTKFISRC	66
MCMRTNFYGFWYYAC	106
MCHVMYYRIMKSLMC	66
MCSHRQYLAYYLAFC	81
MCTRTSVYGFWYYAC	158
MCSFMHKMYLLSRRC	92
MCELFYYKLIQRAIC	65
MCHDRHLIYYMIIC	141
MCIYRLSDFWVLCGC	65
MCQWKKQLLYYLIHC	109
MCEHHLQYYRIWRLC	65
MCPGRHLAYYMYFHC	78
MCYAKLWYQYQKLNC	64
MCKWQRHVIYYKVQC	64
MCFWPIWYKFMAC	64
MCSNTWKLANRWWVC	94
MCWAKYWYVVQKKNC	64
MCNIILYKIMENRC	88
MCTRTSFYGFWYYGC	150
MCGVILYKVLSVC	64
MCMRHLQYFRVMRCC	64
MCVARQIQYYRLWMC	64
MCPRRVLQYYRLWSC	83
MCRDVLYYLLMLC	63
MCTPTSFYGFWYYAC	105
MCTRTSFYGFWNYAC	140
MCWPPFIVKWFVC	63
MCVWPKWLTKSILRC	75
MCQFQYWKYWLCC	76
MCPRWLVKLMLMC	62
MCKHHLQYYRIWRPC	62
MCPVLFYKVFYTC	62
MCRRELYYYLLYSKC	62
MCIYRLSDLWVLC	61
MCDYAAVIWYKLSYC	61
MCTRTSFYGVWYYAC	128
MCFHVMKPFNFLIC	61
MCWWFVPAFSLVC	74
MCAKWFVLYRQMTC	61
MCNILLYKILSAC	74
MCYTRASPRERWRPC	93
MCNTSIIIYKIMKC	60
MCYNNLVVKWLLLC	111
MCTRLLMYYRAFC	60
MCAKYIMVWRHLC	60
MCPPPPPPPPC	59
MCVKMRLLWMQHC	59
MCVYRLSDLWVVC	85
MCIYRLSDSWVMC	59
MCNEVKYFLLWRQNC	59
MCAFYRAMSRRLKC	59
MCAYRLSDFWVVC	59
MCKYATLQWYKWFYC	59
MCYKHILWYKIQKLC	59
MCIYRLSDFWVMCGC	59
MCIYRLPDFWVMC	58
MCNIILCKIMKNRC	58
MCIYRLSDFSVVC	58
MCSNMWRLANRWWVC	72
MCPKYFLLWRLMAC	58
MCIYRLSDFWAVCGC	58
MCKYHLQYYRIWRLC	85
MCYTELWYKYIRRHC	58
MCRLCFSKPFWCC	108
MCAKMFLRYWQIMRC	72
MCRFIVKAFLAMC	58
MCIYCLSDLWVVC	57
MCKKRTLYYFLLHRC	57
MCPRAIKYWNVYYFC	57
MCIYRLSDFLAVC	57
MCMAKRLVSYWKACC	57
MCTCTFDRYLPRLYC	57
MCPKWLLKWFLVC	72
MCSKWVQYYRVIRYC	57
MCHRFVAWYRIWHHC	57
MCNMLCTRLVLLWKC	57
MCVTYYKAWHSMC	57
MCSCFPLLCFITC	78
MCSRTSFYGFWYYTC	57
MCIHRLSDFWVMC	57
MCFKREVVYWNVWRFC	56
MCPILLYKVLSRC	56
MCYLYRFAVFC	56
MCNIVLYKIMKNRC	107
MCYKDLYYYLLVHKC	56
MCCLCFSKLFWCC	97
MCIYRLSDFWDMC	56
MCHNKALFYYLLVHC	56
MCTRITQYYRLWKRC	56
MCAKHVLYYLLQHKC	56
MCGRHVLYYRILRSC	56
MCPMIVKLCYVVDC	56
MCEPRITIYKVLKKC	56
MCWFYKLSDFWVKQC	55
MCREVLYYLVYKRNC	55
MCCYHCWSLFWCC	117
MCHDRHLIYYTIMC	55
MCSCYWPLCELVC	55
MCDAHRLLFELIC	55
MCCVKCFSFFLCC	84
MCVSYWRAWCWSMLC	72
MCMVTLYKVFHFC	54
MCRDLLYYLLTRC	68
MCIYLLSDFWVVC	54
MCPRRVLQYYRLWRC	54
MCFRWRLFQHLTPFC	120
MCTRTSFYCFWYYAC	139
MCEHKKWIRYWQIFC	54
MCFRWRLFHHWTPFC	54
MCNRFVLFYKVSC	84
MCYMREPRALKWTPC	67
MCVWPKWPTKFILRC	54
MCDRHLYYYLAMHRC	54
MCHYYYLLMQRRLYC	66
MCPKMWLAYLRLC	53
MCKHHLQYYRIWRIC	53
MCYKRDLFYYLLSIC	53
MCYDILWYKWQRRIC	53
MCHDKFITLYKVLYC	53
MCKRNITFYLAFMRC	53
MCDLFYYLQHHKKVC	52
MCMKTFQYWRIWHMC	52
MCIYGLSDFWVVC	52
MCKPWITIYKVLKKC	52
MCNIWFVDRKFIWVC	52
MCKHHLQYYRIWRMC	52
MCVYRLSDFWVAC	51
MCMARQIQYYRPWMC	51
MCNIILYKIIKNRC	51
MCKRHVFYYLLFC	51
MCHLFYYKLFHSC	81
MCRYLTYYLHMRTQC	51
MCNVLAWKVYRSFKC	51
MCTRTSFYGFWYYMC	51
MCCTPCYGLFHCC	76
MCRVTHYYRIWIKKC	51
MCSNMRKLANRWWVC	70
MCDVLIYKVLWAC	51
MCKRYIRYWQLYHHC	51
MCLYRLSDFLVVC	51
MCIYRLSDYWVVCGC	50
MCEPWITIYKALKKC	50
MCSNMWKLADRWWVC	66
MCKAIKYALIWMTNC	50
MCEPWITTYKVLKKC	50
MCHFYSIMMRKIRHC	50
MCFKQHLFYYLLQC	50
MCPMFFMRGLGVYLC	50
MCYKRDLYYYLVFKC	50
MCNIILYEIMKNRC	61
MCYTMEVLFYKTDFC	49
MCFRWRLFHLLTPFC	67
MCNRYFAYYLIMTKC	49
MCDRLILYYRIVHKC	49
MCKNKFVWLYKAAYC	49
MCTRTSFYGYWYHAC	62
MCHDRHLIYYMIVC	49
MCYYNINTKILVYC	49
MCCHHCFCYFLCC	73
MCMARQIQYYRRWMC	49
MCKSITLFKVLHKTC	68
MCPKHHLFYYLLWSC	49
MCKVLLNFISTCPIC	49
MCFRWRLLHHLTPYC	49
MCTRTSFYGFWYFAC	100
MCVRPKWLTKFILRC	67
MCVWPKWLTRFILRC	49
MCWPRIVIKWLLC	49
MCTRANFYGFWYYAC	71
MCNIILYKIVKNRC	67
MCQFTYSKFFC	48
MCNIILYKIMKNQC	48
MCRLCFSKLFWWC	48
MCTRTSFYGFRYHAC	90
MCWAKYWYVVQKKKC	48
MCCNRCFLTFLCC	66
MCKREVVYWRVYHFC	48
MCLYRLSDFWVAC	48
MCNCYPILCELFC	48
MCYVQYYRVWRSIC	48
MCYDVLWYRYRYKQC	48
MCTRTSFYGFWFYAC	115
MCLYRLSDFCVVC	48
MCTRTNFHGFWYYAC	81
MCTLTNFYGFWYYAC	48
MCNEVKYFLLWKQHC	71
MCMVTLYKLLSARC	47
MCARTSFYGFRYYAC	47
MCFSCFSKQFWCC	122
MCSRYLTYYLVHVAC	66
MCLYRLSDFWVLC	72
MCKRMLLYYFLAC	47
MCTQTNFYGFWYYAC	83
MCIYRLSDGWVVC	47
MCHRHLAYWIAFHHC	47
MCPVIIYKILSQC	46
MCIYPKIWMVWRTLC	46
MCTWRHVDYSFHYAC	46
MCWVTYWKVMRTC	46
MCKHQFYGYQYWSQC	46
MCFKRDLLYWKLIQC	46
MCKYDKILLYYKIWC	46
MCYDLYYYKLVRRWC	46
MCRDLFYYRLWFRRC	46
MCEIWYFNHQFHHVC	46
MCRLCFTKLFWCC	63
MCTRITQYYRLWRKC	46
MCTHRLYYLVMRNKC	46
MCIKMFLAHKRCC	46
MCDCHPLLCFLPC	46
MCTCYPIICYLSC	46
MCPVLIYKLWRKC	46
MCTRTSFYGFWYNAC	103
MCHAMYYRIMKSLAC	46
MCMAKRLVSYWKAHC	46
MCSKRHLAYYLYMVC	46
MCLAYYLAFHSLC	46
MCSITIYKLLRLC	45
MCIYRLSDFWVWC	45
MCQFLYSNFFFC	45
MCFVYPRRQPLYWMC	45
MCKKHLLYYLIFKQC	45
MCNRHFIKYWIVYHC	45
MCMARQIQDYRLWMC	45
MCMRHLQYFRIMRFC	45
MCFRWRLFHHLTPFCGC	45
MCTRTSFYGFWYHMC	45
MCTWRHVDYSFHYIC	45
MCEPWVTIYKVLKKC	45
MCYARLWYQYQKLIC	45
MCRLCFCKLFWCC	72
MCNIILYKIMKYRC	45
MCSRHVTYWKTFSRC	61
MCYAKLWYQYQKPIC	45
MCVKCWLAYIRMC	44
MCHKLILLYKVARNC	63
MCPKYFLLWRLTTC	44
MCTARLIAYYKIWC	44
MCIRWPARQSLFWLC	44
MCEPWITIYKVSKKC	44
MCIYRSSDFWAVC	44
MCPPPPPPPC	44
MCYLYRFALYC	44
MCYAKPWYQYQKLIC	44
MCVTYWRTWCAFGSC	71
MCRLTKYWQIWLTC	44
MCLWPWQWFDTFC	44
MCIRHLQYFRIMRCC	44
MCDVLVYKVLWTC	44
MCLAYYRSFCTFGMC	44
MCFKWRLFHHLTPFC	44
MCPRWIYYYMLQC	44
MCHRMMVKYWLAATC	44
MCLQRMIRYYQINYC	44
MCFRWRLFHHLTSFC	44
MCDKRHLYYYLLVC	44
MCHDRHLTYYMIMC	44
MCIYRLSHFWVVC	44
MCSRTSFYGFWYYDC	44
MCASKHLLYWKIFHC	44
MCEPWITIHKVLKKC	44
MCKFQHDLWLYLRWC	44
MCPKYFLLWRLMPC	44
MCFRWRLFNHLTPFC	57
MCIYRLSDFFVVC	43
MCYYNVNNYVLVYC	43
MCRDLFYFLLYKRHC	43
MCSILLYKVLLRC	43
MCLRWRLFHHLTPYC	43
MCNRYIQFYRVYRHC	43
MCDKYWVKYWIAWRC	43
MCMRFAVVC	43
MCKKHIQYYRIWRAC	43
MCFGWRLFHHLTPFC	43
MCYEKLWYVLMRRMC	43
MCPITLYKLLLMRC	43
MCTRTNFYGSWYYAC	72
MCVDLFYYKLFRKLC	43
MCPKYFLLWRRMTC	43
MCPVSIYKLWRTC	43
MCTRTSFYGLWYHAC	59
MCTRHLQYFRIMRCC	43
MCDHKRHLYYYILWC	43
MCIYRLSEFCVVC	43
MCYAKLWYQYRKLIC	56
MCTRTSFYGIWYYAC	109
MCEHRHPYSNFWILC	43
MCTCYPLLCWLHC	42
MCYAKLWYQYQKLFC	42
MCRLWCEWRFTFPAC	42
MCHSNLIIKWLLFC	42
MCIYRLSDFLVMC	42
MCTRTNFYGFWYYSC	42
MCIARQIQYYRLWMC	76
MCPRLVQYYKVWLRC	42
MCIYRLPDFWAVC	42
MCRDRHLIYYMIMC	42
MCIYRLSDFRVMC	56
MCTRTNLYGFWYYAC	102
MCNVTIWKVLRFC	61
MCCKRMLKYYMLMLC	42
MCRLRFSKLFWCC	74
MCPALIYKLWRTC	58
MCFRWRLFLHLTPFC	72
MCKRHLYYYLLSRSC	41
MCRLCLSKLFWCC	78
MCCHRCWSLFWCC	62
MCFALLYKILSLC	41
MCIRWPARQPLFWLC	86
MCNKRHLYYFLLWRC	41
MCYVCFEHRFLCC	61
MCLISIYKVLRHC	41
MCSRTSFYGFWYHAC	68
MCYEILWFRYQRQKC	41
MCMARQIQYYSLWMC	41
MCYTRWPWESLWRLC	41
MCMPKWLSKWALFC	41
MCPVLIYKPWRTC	60
MCAKMFLRYWQIMWC	41
MCSCPPPLCEIIC	41
MCYVTWYKVTKKQC	41
MCANRHLFYYLLYHC	41
MCYMKQRHSRQWVTC	41
MCYDNVILYKILFC	40
MCKQLYYYKLWLRQC	40
MCQKKLWLLYYKVFC	40
MCEYYVSLYRAFHKC	40
MCKVHLYYYSLYRAC	40
MCEPWITIYRVLKKC	40
MCNIILYKLMKNRC	40
MCAKYFMLWRQFTC	40
MCSDMWKLANRWWVC	40
MCWPSIVVKAMLHC	40
MCKNHLFYYIVWHHC	40
MCLPRMVRYYQINYC	40
MCKRRAILYYLLNKC	40
MCRRTSFYGFWYYAC	88
MCKRFIVYWKINQFC	40
MCIYRLWDFWVVC	40
MCMRHLQYLRIMRCC	40
MCNVIVYKVLRKIC	39
MCPLHMHRGMAMFVC	39
MCLSVRHVLFYKTVC	39
MCPLRIVAYYRAYMC	39
MCHSNLIIKWLLYC	39
MCIYRCWSLFWCC	61
MCFMKWPWQLYYSRC	39
MCGRELFYYKLWHYC	39
MCHDRHLIYYMTMC	39
MCNKHLFYYLLHYQC	39
MCYYEVQWYRWRVKC	39
MCCRWRLFHHLTPFC	39
MCGPWITIYKVLKKC	39
MCSNVWKLANRWWVC	39
MCSLHCFYCLLFC	39
MCTRASFYGFWYHAC	39
MCVSYYRAYFAHC	39
MCIYRLSDVWVMC	38
MCSNMWKLASRWWVC	38
MCPMAKYWLLWKLTC	53
MCFRWRLFHHLTPCC	65
MCSQSWVLYELWRVC	51
MCPLHMRRGMAMFAC	38
MCDRITIYKVLRRC	38
MCHAKLWYQYQKLIC	38
MCMARQIRYYRLWMC	38
MCRWVKYYQIVHRQC	38
MCARLIAMWKAHSTC	38
MCIIILYKIMKNRC	38
MCRLYRKASFWVC	38
MCTRTNFYGFWDYAC	38
MCDVLLYKLFRHC	38
MCPVCVKYIMSKSFFC	38
MCRHTQYYRVMRSKC	38
MCSCPFPLCELMC	38
MCYAKLWYQHQKLIC	38
MCFWKKLHVFWVKDC	38
MCREVRYFQIWKAYC	38
MCSRTSFYGFWYYVC	38
MCTRTSFYVFWYYAC	92
MCNIILYKMMKNRC	37
MCNEVKYFLLWKRNC	37
MCNIILYKFMKNRC	37
MCVARMTLYYRHMCC	57
MCGWPLWLVKAVVC	37
MCIYRLSDFWVSC	37
MCLARQIQYYRLWMC	74
MCEPWITIYKVLKTC	37
MCFFCFDRLFLCC	69
MCHKLILLYKVARMC	37
MCRSVYYYLLFKC	37
MCTLTSFYDFWYYAC	37
MCMRTIQMYRVYRC	37
MCPPPPPPPPPC	52
MCDRHVLYYQVFRRC	37
MCIYRLSDFWAIC	60
MCKNHFYGYHYWSVC	37
MCIHRLSDFWAVC	37
MCLLWTRHFDRYWVC	36
MCRWVHYWQIMRKMC	36
MCNKYLAYYLIWKQC	36
MCNIILYKIMKNSC	54
MCSQSWVLYKLWRVC	36
MCNIILYKIMNNRC	52
MCNNITIYKIMKHC	36
MCMARQIQYHRLWMC	36
MCTKRMLLYYLVHTC	36
MCRLCFSKLFWRC	70
MCHDRHLIHYMIMC	36
MCPRRVLQYYRLWMC	36
MCIYRLSDFWVVVC	36
MCIYRLSDFWFVCGC	36
MCSRTNFYGFWYYAC	49
MCTRITQYYRLWKMC	36
MCCKRDIIYWLLMRC	36
MCRLCFSKLFCCC	59
MCIYRLSDLWFVC	36
MCIYRLSYFWVVCGC	36
MCNTHLKYYLIFRQC	36
MCDYAYRQWYKWQYC	36
MCHKLISLYKVARKC	36
MCYEILIYKIQKTQC	36
MCCYRCWSLLWCC	60
MCKATWEVVLYKLTC	36
MCHVTYYRIMKSLAC	36
MCYAKLWYQYQELIC	36
MCHDRHLIYHMIMC	36
MCHPMWLVKIVCC	49
MCMAKQIQYYRLWMC	35
MCPNKDLFYYLLVRC	35
MCCFKFRDLFWAC	35
MCHCFPTICWLMC	35
MCFSITLYKVLYC	35
MCMSRQIQYYRLWMC	35
MCVWPKWLTKFIFRC	35
MCFWKKTAAFWVQIC	35
MCTRTSFHGFWYHAC	49
MCKKDLFYYLFWRRC	35
MCHVMYYRIMKSLPC	35
MCRYVYYYQLFHRQC	35
MCHDRHPIYYMIMC	35
MCHVWYYQHAFHWVC	35
MCTRTNFYGFWHYAC	48
MCKRHLYYYFLVRKC	35
MCIYRLSDFRVVCGC	35
MCGFPKYWVVWRTTC	35
MCDVLLYKLMLQWVC	35
MCSCHPLLCALFC	35
MCLRLCAYYRAYTSC	35
MCHLFYYRLYHRHWC	35
MCYLMYSCLLGAC	35
MCYKEVLWYKIRYLC	35
MCKQMLMYYIIAKKC	35
MCKRHIIYWQLYHSC	35
MCIYRLSDFWFLC	35
MCKATWEVVLYKLKC	35
MCLYRLSDFRVVC	34
MCTRTNFCGFWYYAC	34
MCFLNIKNGLLVYC	34
MCHDRHLIYYMIKC	34
MCIYRLSGFWVMC	34
MCVWPKWLTEFILRC	34
MCQFLYSNFFC	34
MCWKFAWLMAKCC	34
MCQLTFGRFWSHLRC	34
MCPRRMIAYYRIINC	34
MCTGNMLKLCLVYMC	34
MCNIILYKIKKNRC	34
MCFWPDTKMLVVWMC	34
MCYAKLRYQYQKLIC	57
MCPYEIKYWIVWQQC	34
MCLWFGTVPVLYC	34
MCYAELWYQYQKLIC	34
MCSRYVTFYRAFLPC	34
MCVAFYRAFMASC	47
MCIYPLSDFWVVC	34
MCPLWFYKVLRFC	34
MCKRYVRYWQIYVAC	34
MCYNVLWYRYQHKKC	34
MCMRTSFYGFWYHAC	52
MCKHHLQYYRIWRFC	34
MCTRTDFYGFWYYAC	50
MCDSDTSWWKYWWIC	33
MCKRHLLYYQLILKC	33
MCQKMVWLWKATQNC	33
MCFRWRLFHHMTPFC	33
MCRMCFSKLFWCC	55
MCIGKWYTYQYWTHC	33
MCIYRLSDWWVVC	33
MCKIIWYKVHKTC	33
MCFRWLLFHHLTPFC	33
MCCYRCWSLFLCC	58
MCIYRPSDFWVVC	33
MCRLCFSKLFLCC	54
MCPKMLLYYMLHLC	33
MCMARRIQYYRLWMC	33
MCARHLIYYLLYC	33
MCERTLYYWKLFNKC	33
MCTCCPILCWFIC	33
MCRSVYYYLLNRC	33
MCRWDVTLYKLFRKC	33
MCDKRRVLAYYLLWC	33
MCTRTSFYGFWVVC	33
MCHDRHLIYYMVMC	33
MCAWPLYYTMVCC	33
MCIYRLSDSWAVC	33
MCHVMYYRIMKSPAC	33
MCSNIWKLANRWWVC	33
MCDARYVLYFLLNRC	33
MCFSPSVVKYYLALC	33
MCDLKRELFYYLLVC	33
MCSNMRKLANRWWAC	33
MCFMWRLFHHLTPFC	32
MCVGAPFNAKVLTLC	32
MCCYRCWSLSWCC	32
MCEVIWYKIQYRLC	32
MCIYRLSEFWVMC	32
MCHVMYYRIMESLAC	32
MCIPSWLIKLLPTCC	32
MCMKRLVVYYKVSAC	32
MCDCHPLLCFLHC	32
MCLPCWKYFLCC	32
MCVMHVLIYKAHC	32
MCMWPVYWRTVLTAC	32
MCCFKFRDLFWMC	32
MCKLHVLYYLIHNQC	32
MCTRTNFYGFWYYEC	32
MCFRVINTPRPYLIC	32
MCPISIWKVFRMC	32
MCVWPKWLTKFVLRC	32
MCSAVVLKYFLFC	32
MCHCYPVLCYFLC	51
MCSILLYKVLSPC	32
MCCYRCWPLFWCC	51
MCFYRLSDFWVMC	32
MCYAKLWYQYQKLSC	52
MCKRFILYYKIAKSC	32
MCAKYLLYYKLWRRAC	32
MCFCLGYYCYLFC	32
MCTRTSLYGFWYHAC	49
MCDCFPLLCYMRC	31
MCIYRLSDLWVAC	31
MCLSRMIRYYQINYC	31
MCEHLFYWRIWRRAC	31
MCLYRLSDFWVVCGC	31
MCFRAHWFSTVLYTC	31
MCRYITYYSLMHALC	31
MCWWMKNHIFWNKKC	31
MCIYRLSDCWVVCGC	31
MCTYRLSDLWVVC	31
MCNKFVTIYKVLRVC	31
MCHDRRLIYYMIMC	31
MCIYRLSEFWVGC	31
MCRHLWLHLWRPPKC	31
MCKHHPQYYRIWRLC	31
MCSNMWKLANHWWVC	31
MCKRTNFYGFWYYAC	31
MCTRTSFYGFRYYTC	31
MCTRMNFYGFWYYAC	50
MCLVSIYKIMRMC	31
MCHVMYYRIMKPLAC	31
MCYDRHLIYYMIMC	31
MCEKMVAYWRAMTRC	31
MCTRTNFYGFWYCAC	31
MCNIILYKIMKKRC	45
MCSCVYVMCYLIC	31
MCTRTSFYGFWYYPC	78
MCKHIKYWIVWHQHC	31
MCHKHIAYYLIWRAC	31
MCIYRLSDFCVMC	31
MCIYRLSGFWAVC	30
MCTRTSSYGFWYHAC	44
MCKRELYYYLLWQC	30
MCTGRHLYYWKLFHC	30
MCFRLRLFHHLTPFC	30
MCHRFVAWYRIWHPC	30
MCDRHLFYWKLWHYC	30
MCTNMWKLANRWWVC	30
MCNNRQLKYYLIWLC	30
MCMTRQIQYYRLWMC	30
MCIYRLSDFWTVC	30
MCLYRLSEFWVVC	30
MCTRTNFYGYWYYAC	61
MCIYRLTDLWVVC	30
MCPIHFFKIVYRHC	30
MCKHLYYYLHWHRRC	30
MCTRTSFYGFWYHEC	30
MCRYRCWSLFWCC	47
MCMRHLQYFRMMRCC	30
MCRHTQYYRIMRRKC	44
MCCYRCWSLFWWC	30
MCQFRFSKFWLLC	30
MCVWPKWLAKFILRC	30
MCTHLFYYQLWIKKC	30
MCSVVLYKIMKKNTC	30
MCPLYMRRGMAMFVC	30
MCDWPRWLVKVVC	30
MCGVLLYKVMRMC	30
MCPVRQYYWLLLC	57
MCHVMYYRITKSLAC	30
MCRRQLCYYLLYRSC	30
MCIYRLSDFWVVFGC	30
MCYEVLWYKYIYRKC	30
MCVQRHLIYWKIFHC	30
MCLTNLYLFSRFAC	30
MCSKALFYYLYWLRC	30
MCEREFLYYYLYYKC	30
MCFTLCELYRFHRSC	60
MCRLCFSKLFC	29
MCRSIVFYKILRC	29
MCGHTQYYRIMRSKC	29
MCVWPMWLTKFILRC	29
MCFVTLYKLLKWC	29
MCSVMIYKLMKATQC	29
MCMMRSPESPLWTPC	29
MCGFSRDLLYWCIMC	29
MCEPWITIYKVLEKC	29
MCIKMFLAHKRSC	29
MCDVIVYKVLKKIC	29
MCTRTSFYGFRYYVC	49
MCYKSGFYAYRYWEC	29
MCTRTNFYSFWYYAC	43
MCAYHLLYYKIARSC	29
MCTRTSFYGFWYYNC	29
MCRLCFSKLLWCC	78
MCMARQIQYYMLWMC	29
MCMRHLQYFRITRCC	29
MCIYRLSDFWSVC	29
MCTWRHVDYSFHYNC	29
MCWYVQHSFYWERLC	29
MCRDFDIIWYKLQFC	29
MCKYETMWYQYMYMC	29
MCMVTLYKLLSAPC	29
MCMARQFQYYRLWMC	29
MCIYRLSDVWGVC	29
MCPKWLLKWFLPC	29
MCYCMKPVCWLMC	29
MCWHLWPTLRLLC	29
MCDVLLYKLMLQWPC	29
MCPRDIKYYLIWRVC	29
MCIYRLSDFRAVC	29
MCIYRLSNFWAVC	29
MCRYTQYYRIMRSMC	29
MCTRTSFSGFWYYAC	58
MCTRTSFYGFWHHAC	29
MCIYRLSDVWAVC	29
MCKEVYYYILWQKYC	29
MCKRFIQYYRIVHAC	29
MCLYVFELGRTAKWC	29
MCTQTSFYGFWYHAC	44
MCREIRYWQLYRAFC	29
MCIYRFSDLWVVC	29
MCTRKSFYGFWYYAC	54
MCTYTYVFNQTYVHC	28
MCHMKYWMLVRRHMC	28
MCRLCFSKLFRCC	50
MCMARQIQYCRLWMC	28
MCYNILWYKLQRRKC	28
MCKIVQYYRVFRALC	28
MCYKEILWYKVQRTC	28
MCIYRFSDFWVLC	28
MCKVIRYYQLWRRVC	28
MCLYRLSDVWVVC	28
MCLLYYLAYHSKKNC	28
MCEPWITIYKVLKHC	28
MCRVMYYRIMKSLAC	28
MCWYVQMWHHWNYTC	28
MCPKYFRIWLNCC	28
MCGITIYKVLYTC	28
MCVKCWLAYIRKC	28
MCRDVLYYLLMRC	28
MCYMKSKFQLLWQEC	28
MCHYCFNRLFLCC	97
MCVCPKWLTKFILRC	28
MCIYRLSDFLFVC	28
MCGYQFFKVLFC	28
MCCKWIVTLYKVAKC	28
MCFSPSVVKYYLAYC	28
MCVWPKWLMKFILRC	28
MCIKMFLAHKRMC	28
MCMRHLQYFRTMRCC	28
MCPKWTAYYRVFRSC	28
MCHDRYLIYYMIMC	28
MCREIYYYQLYIKHC	28
MCIYRLSDLFVVC	28
MCSEVKYFLLWKQNC	28
MCVHRHPFQLHWRKC	28
MCFYRLSDLWVVC	28
MCKIIWLYKAARRFC	28
MCYTKAYWHEPWRPC	28
MCCSLVSLYKILC	28
MCLACLYKVLKKC	28
MCSRWVQYYRVIRHC	28
MCCFKLRDLFWVC	28
MCRLWRLTKTWMC	28
MCNKHLKYLFVWQYC	27
MCLYCLSDFWVVC	27
MCKHLYYYLLWKKC	27
MCSNMWKLANRWRVC	27
MCEQRWPRSLLWFPC	27
MCHLSSVILYKIMC	27
MCIRWRLFHHLTPYC	27
MCVKCWLAWC	27
MCFRWRLFHHLTLFC	27
MCVVCYKVWRHTLPC	27
MCPKWLLKWLLAC	45
MCYIILYKIMKNRC	41
MCEPWITIYKVLKEC	27
MCFRWRLFHHLTPVC	27
MCFRWRLFRHLTPYC	27
MCVYRLSDFWIVC	27
MCKFKRDLRFYQIFC	27
MCIYRLSDFWAGC	27
MCNRDLFYYLLTKHC	27
MCHDGHLIYYMIMC	27
MCIYRLADFWVMC	27
MCYEFVFGYVFNYQC	27
MCIYRLSDCWVMC	27
MCHVFWYRVHKRQIC	27
MCPKYFLPWRLMTC	27
MCKHHLQYHRIWRLC	27
MCTRTSFYGFWYYACGSGC	66
MCYATYWFRMQYKKC	27
MCRRSCFYHLIFC	27
MCKQILYWMIWKRC	27
MCWPILWKVLSAC	27
MCSMTPMVIKWLLHC	27
MCNHRFPYFTRFWHC	27
MCHFYSIMMRKIRLC	27
MCVKYFTLWKNRC	27
MCMASQIQYYRLWMC	27
MCVYEYVFDRLTVTC	27
MCDRILFYYLLHQSC	27
MCPLRIVAYYRAYRC	27
MCKFDLDLLFYKIWC	27
MCTMKDKYTKRWHKC	27
MCIFRLSDLWVVC	27
MCKRHIRYYQLHFWC	27
MCIYRLSEFLVVC	27
MCHKQAIIWYKIQYC	27
MCIYRLSDVLVVC	27
MCRLCFSKLSWCC	41
MCIYRSSDLWVVC	26
MCWWKKVSQFWLQIC	26
MCNIILYKIMKIRC	26
MCYVDYRNGVIIYC	26
MCIYRLSEFWAVC	26
MCFRWRLFHHLAPYC	26
MCKRFIKYWQIWRQC	26
MCNLHLFWYLQQHKC	26
MCTRMSFYGFWYHAC	47
MCRLCFSKLYWCC	41
MCTHWHPYIKIVRAC	26
MCARTSFYGFWYYTC	26
MCKRHILYWKIIQSC	26
MCDKRHIKYYIVWHC	26
MCIYRLSDFCVVCGC	26
MCHKLVHYYRIWRKC	26
MCRHYIYYLIQHRHC	26
MCRHTQYYRIMRSIC	26
MCDRHLIYYLISHHC	26
MCYYNFLNKVLVYC	26
MCEKYVLFWKIYQSC	26
MCFALLYKILSQC	26
MCEVQYYRIWLAYQC	26
MCVYRSSDFWVVC	26
MCDWPKWLTKFILRC	26
MCNVHLAYYLIVHQC	26
MCNKHLFYYRAFHHC	26
MCVWPKWLTMFILRC	26
MCHITIYKILRYC	26
MCEPWTTIYKVLKKC	26
MCYLRWTQYYRALQC	26
MCAKYMAKCRTVFLC	26
MCYAKLWHQYQKLIC	26
MCYYWTYIYEKQQKC	26
MCYLRWTQYYRALRC	26
MCHQRLLYYYFLSHC	26
MCHVMYHRIMKSLAC	26
MCPREIVIFKVLRC	26
MCMRHLQYSRIMRCC	26
MCWHLPYFLWHLC	26
MCDAHPYLFELLC	26
MCLYRLPDFWVVC	26
MCPVVLYKVLLSC	26
MCMRLIQYYRYHC	26
MCPNMWKLANRWWAC	38
MCMRHLQYFRIMRGC	25
MCHIILYKIMKNRC	25
MCFRWRLFHHLMPFC	25
MCVKYFTLWRNWC	25
MCNWHLFYYRLVKKC	25
MCVTYWRTWCAFGYC	25
MCPKWLLKWFLSC	40
MCFRLVYPRRSWLVC	25
MCIYHLSDFWVMC	25
MCPVLIYKLWHTC	25
MCTRTIFYGFWYYAC	63
MCPVLTYKLWRTC	25
MCRLWFSKLFWCC	40
MCAKWFALYRQMMC	25
MCSILLYKALSRC	25
MCYICFSGLFYCC	48
MCPEYVFYYLLHRSC	25
MCVYRLSDFWVLC	46
MCFVTLYKLLKYC	25
MCIYCLSDFWVMC	25
MCCYRCWSLFRCC	44
MCFRWRLSHHLTPYC	42
MCDVLLYKLFRCC	25
MCLKPVAHPIYVFTC	25
MCTRTSFYGFWYRAC	25
MCKHLYYYLLWTKSC	25
MCPVLLWKILYKC	25
MCPVLICKLWRTC	25
MCKMLHYYRVMRTTC	25
MCYKLFLLWKQWC	25
MCRWDVTLYKLFHMC	25
MCRFYMIMCRALRC	25
MCPKYFLLLRLMTC	25
MCSISLYKVLSRC	25
MCREVFYYSLFYRHC	25
MCVRWRLFHHLTPFC	25
MCVVCYKVWRHMLRC	25
MCRHVSYYLIFNRRC	25
MCPVLIHKLWRTC	25
MCYRCFENLFYCC	25
MCQFRYARFFLCC	25
MCWTRKDRNSKWQTC	25
MCTRTNSYGFWYYAC	25
MCRLCFSKLFWCCGC	44
MCIYRFSDFLVVC	25
MCRHTQYYRIMRSTC	25
MCIYRLSVLWVVC	24
MCTRTSFYGFWYHSC	38
MCVWPKWHTKFILRC	24
MCRLCFSKLFWGC	24
MCHPRIVYYYLLHRC	24
MCRLRCFYHLLFC	24
MCYHVFYYQLYKRKC	24
MCIYRLSDFWCVC	24
MCMARQIQYFRLWMC	24
MCTRTNFYGFCYYAC	37
MCRFLAYYLISRC	38
MCMRHLQYFRIMGCC	24
MCDHTKWFKVIYRFC	24
MCMGRMILYYKLLKC	24
MCHCIFPLCFFIC	24
MCNVLLYKILSVC	24
MCRRFVAYFRSFCC	24
MCMRHPQYFRIMRCC	24
MCYAKLWYQYQKRMC	24
MCPLRIVAYYRAYNC	24
MCPVLIYKLRRTC	24
MCDCHPLLCQSMC	24
MCCYRCWSLFC	24
MCPVLVYKLWRTC	24
MCLTYYLLFRKMMQC	24
MCIYRLSNFWVMC	24
MCIYRLSDLWVGC	24
MCKKLHLFYYLLASC	24
MCCIFCFRSFWCC	24
MCIYRLSDLWGVC	24
MCKRHIVYYRLWQLC	24
MCFYRLWYAWHRKAC	24
MCYLVRHRDFSRHVC	24
MCKYFHVDYQYWYLC	24
MCYVQYYRVYHRQC	24
MCLNMWKLANRWWAC	24
MCQFRFAKFFILC	24
MCFSDLVIKFFVC	24
MCYALIYKLMKSC	24
MCIYRLSDFWYYAC	55
MCPKYSLLWRLMTC	24
MCWKFIWSLRRHC	24
MCHFYSIMMRKIRTC	24
MCMNFILYYKVTC	24
MCPIYLKQGIGLYLC	24
MCNVSIYKILAHC	24
MCKRFVAYYRVVKC	24
MCVYRLSDFWVVCGC	24
MCKRFVVYYQAARSC	24
MCVTYWKVMHALAKC	24
MCKRHILFYQVFRRC	24
MCFRWRLFHHLSPFC	24
MCIYRLSDFWVVRGC	24
MCKRHLIYYILQFKC	24
MCWWFKNHKFWHQTC	24
MCTRTRFYGFWYHAC	39
MCHDRHLVYYMIMC	24
MCYNNLVVKWLLSC	23
MCDRELFYYLLVHTC	23
MCSVWFFNRKFHWVC	23
MCNEVKYFLLWKQTC	23
MCRHTQYYRITRSKC	23
MCIYRLSDLWIVC	23
MCIYRLSDCWGVC	23
MCKREIRYYQIHRAC	23
MCEKYLLYYILNRYC	23
MCFWRFYPALILC	23
MCRHTQYYRIMWSKC	23
MCPRCEVLIYKLLC	23
MCEPWITIYKGLKKC	23
MCFKHPWFFAWVC	23
MCRHTQYYRIMRGKC	23
MCFRLAQYWRVWC	23
MCPRYFWYHYLPC	23
MCSSCIKYYLIMRC	23
MCFALLYKILHEC	23
MCLYRLTDFWVVC	23
MCLRWRLCHHLTPFC	23
MCKHHLRYYRIWRLC	23
MCSCFPPLCFLMC	23
MCYNNLVVKWLLCC	23
MCVRHLQYFRIMRCC	23
MCMARQMQYYRLWMC	23
MCEPWITVYKVLKKC	23
MCHRHLAYYRAWLTC	23
MCEPWITIYKELKKC	23
MCFTRTDKWMPWVKC	23
MCFWIKGPFYWHKLC	23
MCKHHLQYYRTWRLC	23
MCIYRLTDFWVMC	23
MCKHHLQHYRIWRLC	23
MCYTKSPASHIWHKC	23
MCIYRLSDYWVMC	23
MCVTLWKVLRTMC	23
MCNIILYKIMKKC	23
MCYVTWYKVTKKPC	36
MCNWHVQIWRAFHKC	23
MCEPWITIYMVLKKC	23
MCYKNISTGIFLYC	23
MCSKCFNDLFYCC	23
MCQKMVWLWKATQKC	23
MCTYRLSDFWVAC	23
MCNRITIYKVLRCC	23
MCYNVLWYRFIKAKC	23
MCTKFPWPFPIFWVC	23
MCHDRHLIYYMILC	38
MCCYRCWSLFCCC	23
MCLYRFSDFWVVC	22
MCKARQIQYYRLWMC	22
MCTRTSFYGFSYYAC	37
MCIYRLSYFWVLC	22
MCAKYWTVWKRTC	22
MCYEILIYKIQKTRC	22
MCGRYVTFYRAFLSC	37
MCVYRLSNFWVVC	22
MCIYRLSDFWDVCGC	22
MCNRHLYLYLAFHKC	22
MCWFYDYRNFRHIFC	22
MCTRTSFYGFWYDAC	22
MCSITIYKLLRYC	22
MCMARQIQCYRLWMC	22
MCNFILYKIMKNRC	22
MCGRHLYYYLAMHKC	22
MCQFVFSRYFLSC	22
MCTRITQYYRLWKNC	22
MCANLRAVVYYRLYC	22
MCHDRHLIYYVIMC	22
MCRHTQYYRIMGSKC	22
MCFYRLSDFWAVC	22
MCYNVFWYQWRRQRC	22
MCPKRLIKYWQIWHHC	22
MCLDLFYFKLWHRHC	22
MCMKNIWYYLVWKKC	22
MCLVNDMLGRLVFIC	22
MCYSAKYWAVLRFLC	22
MCHVMYYRTMKSLAC	22
MCIAIYKLMKMRC	22
MCHCPMVLCWMLC	22
MCSCIPVLCEQLC	22
MCPKVALLYYQLFC	22
MCNIIQYKIMKNRC	22
MCYAKLWYRYQKLIC	22
MCNWYRIFMAHYHHC	22
MCVVCYKVWRHTLLC	22
MCHERLLTYYRTWC	22
MCKEIIWYKVEWLRC	22
MCVWPKWLTKIILRC	22
MCIYRLSDCWAVC	22
MCMRHLQYFRIMRHC	22
MCYVWQYIYENQQIC	22
MCSRFAAYYKAWKKC	22
MCVWLKWLTKFILRC	22
MCDDYILFYKILRIC	22
MCREVRYWQIWQSIC	22
MCVYRLPDFWVVC	22
MCKRHIAFWRVWHKC	22
MCHDRHLIYFMIMC	22
MCFRWRLFHHLTPFCGSGC	21
MCYAKLWYQYQKHMC	21
MCHDRHLIYCMIMC	21
MCWPPWLIKLILC	21
MCDKFVKWYIVFRHC	21
MCPRLALAYYKAFTC	21
MCIYRLSEFWGVC	21
MCWEEFTKFGWWTIC	21
MCEREFLYIYLLELC	21
MCTRTNFYVFWYYAC	21
MCDVLIYKVLWTC	21
MCQRYTKFHAYFC	21
MCHKRHLVYYKYWLC	21
MCPLYMRLGLAVNMC	21
MCEHLYYYLLSHRRC	21
MCKFLCYYKLLRRLC	21
MCYNTKYWFTVFDVC	21
MCKRLIVYYKTFYHC	21
MCHRYIQYYRAFHQC	21
MCGRYVTYYLSFC	21
MCYWFYYDPGPYQFC	21
MCIYRWSDLWVVC	21
MCDKYLQFYLIWHAC	21
MCRHTQYHRIMRSKC	21
MCFRWQLFHHLTPYC	21
MCIHRLSDLWVVC	21
MCNKVLFYYRVWRHC	21
MCLWAHYYMLMRKKC	21
MCNTDHYRWKLWWIC	21
MCMAGQIQYYRLWMC	21
MCHSNLVVKFFLQC	21
MCIYRLPDLWVVC	21
MCMARQIQYYGLWMC	21
MCFHPAIVKAFLLWC	21
MCKFKWHEWQDWRSC	21
MCDKCVTFWKAWMHC	21
MCQETCIKMLLVWKC	21
MCQFYRAMVMLLRNC	21
MCTRTNYYGFWYYAC	21
MCHVMHYRIMKSLAC	21
MCKYAFYGYQYWSQC	21
MCRREVVLYKILLHC	21
MCAKWFVLYRQMIC	53
MCRHLVYYKLWRRNC	21
MCKLHLQYYRIWRLC	21
MCPVLLWKILYTC	21
MCDEVKYFLLWKQNC	21
MCHERHLIYYMIMC	40
MCEPWIAIYKVLKKC	21
MCYRWRLFYHLTPFC	21
MCVVCWKAIRKLC	21
MCCYRCWSLFWRC	36
MCLPRMIRYYQINFC	21
MCPVLIYRLWRTC	21
MCPKYFLLRRLMTC	21
MCCFYFSAGVHLC	21
MCELWITIYKVLKKC	21
MCYHSIFTKLMIYC	21
MCVYRLSDFWAMC	21
MCFTLCELYRFHRYC	21
MCNVLIYKLMC	21
MCNHHLQYYRIWRLC	21
MCWHFWPSLVLLC	21
MCKRHVRYWQLFVGC	21
MCKQHHLFYYKLFKC	21
MCRHTQYYRIMRSSC	21
MCEPWITIYKVLKQC	21
MCTRTSFYGFCYHAC	20
MCEITLFKLLHSHC	20
MCVYRLSDFCVVC	20
MCMYRLSDFWVMC	20
MCNLKSIWGYVAYTC	20
MCWWIKHPYGWLQTC	20
MCYKRDLFYYLLSVC	20
MCRAILYYKLFHRVC	20
MCEHRHPYEAFWHEC	20
MCPYSITLYKVFRHC	20
MCTRTNFYCFWYYAC	20
MCEHLFYYLLVKRQC	20
MCHKYVQLYRWWHHC	20
MCIHRLSDFWVVCGC	20
MCDRHLYYYLAIHMC	20
MCMRHILYYLLWC	20
MCQFTYSKFFFFC	20
MCNGLFYWRLYMRNC	20
MCNKYLYYYLLYHSC	20
MCKHLAYYLIFNRWC	20
MCIYRLSDFCFVC	20
MCNIILYKSMKNRC	34
MCKFKRELYYYLLTC	20
MCIYRLTEFWVVC	20
MCPVFIYKLWRTC	20
MCCYRCWSSFWCC	33
MCVYRLSDVWVVC	20
MCIYHLSDFWAVC	20
MCKRFVTYWRIYKQC	20
MCTRTNFDGFWYYAC	20
MCIYRLSDFWLLC	20
MCSNMWKPANRWWVC	20
MCRLCFSKLFWC	20
MCNVIVYKVLKKTC	20
MCTRTNFYGFWNYAC	20
MCNILLYKIMKNRC	20
MCKRHVSYYRIWRKC	20
MCTRTSFYGSWYHAC	50
MCKHHLQYYRIWGLC	20
MCTRTNFYDFWYYAC	20
MCKIFYFNRTLHPAC	20
MCFRWRLFHHVTPFC	20
MCRLCSSKLFWCC	35
MCNHYLYYYLLFNKC	20
MCVHRLSDFWVVC	20
MCFRWRLCRHLTPFC	20
MCSNMWKLANRRWVC	20
MCPVLIYKLLRTC	20
MCIFRLSDFWVMC	20
MCPKWLLRWFLAC	20
MCHDRHLIYYMSMC	20
MCEITLFKLLHSRC	20
MCYRNLVAYYKAAMC	20
MCYVTLWKLMKFC	20
MCYTKCFWCRHWSMC	20
MCWRLVWPEHSYLFC	20
MCVWPKWLTKFILCC	33
MCHCFPLLCHLLC	34
MCNLILQYFRAHTRC	20
MCRRYTLYYTLMC	20
MCSHCWLFKVLLC	20
MCPISIYKVLKHC	20
MCHVQYYRAFLSTQC	20
MCDITLYKVMTKHKC	20
MCPKYFLLWRPMTC	20
MCLHWVRYFQAFC	20
MCPVLIYKLWCTC	20
MCCAKLWYQYQKLIC	20
MCVFKLCPWHDCLVC	20
MCACFPVLCYLLC	20
MCSKWVQYYRVIRLC	20
MCKRHLLYYLIAC	20
MCLISIYKVLKYC	20
MCLISIYKVPKHC	20
MCTCPFILCWLLC	20
MCDWMVVHYRMARYC	20
MCTRTGFYGFWYHAC	20
MCTFYGLMLRRLRSC	20
MCPYKYFSLWRLCC	20
MCSCFPLLCFNLC	20
MCSMKNPQSPYWLPC	20
MCFRWRMFHHLTPFC	19
MCRHTQYYRIMRSEC	19
MCIYRLSDLWLVC	19
MCIRWLNKYWLC	19
MCIYRLSDFWVRC	19
MCPKWRMLYKVMKYC	19
MCPNAIIFYKVMYC	19
MCLISIYKVLKLC	19
MCNIILYKIMKC	19
MCRLCFSKRFWCC	19
MCSKYFLLWRLMTC	19
MCHDRHLIYYMFMC	19
MCYAKLWYQYQKHIC	19
MCTHRHPYSQIWLKC	19
MCPSKRHLLYWRIWC	19
MCKKHIQYYLYFRYC	19
MCHIHRFYYLLHLKC	19
MCGRDLYYYLIVRSC	19
MCDYRLSDFWVVC	19
MCRVWYIEREFYWAC	19
MCIYRLSEFWVLC	19
MCKDKLYLYYYLRWC	19
MCPYEIKYWIVWTQC	19
MCIYRLSDVWVLC	19
MCYEVLIWKVLQQKC	19
MCHFKRDYYWYLWQC	19
MCIYRWSDFWVMC	19
MCEKKAILYYLLNRRC	19
MCKHYLQYYRIWRLC	19
MCLYRLSDFWVGC	19
MCEHRHPFTQYWLRC	19
MCVYRLSEFWVVC	19
MCIYRLSDFWVPC	19
MCCYRCRSLFWCC	32
MCYVMYYRIMKSLAC	19
MCEPWITFYKVLKKC	19
MCFSPSVVKYYLASC	19
MCCYRCWTLFWCC	19
MCHDSHLIYYMIMC	19
MCTRTSFYGFWCHAC	19
MCAKHRFFYLLVRKC	19
MCIYRLSDFFWVVC	19
MCRHIVYYRLWHKSC	19
MCTRTNCYGFWYYAC	19
MCLKKHLYYYLLFHC	19
MCDRRHLYYYLLIQC	19
MCTWRHVDYSFHYEC	19
MCRLCFSKLFWFC	19
MCTRTNFYGFGYYAC	19
MCVYRLSDFRVVC	19
MCNIILYKIMMNRC	19
MCYPKEVLYYKIWLC	19
MCVVCYKVWRHTLWC	19
MCFWPKLWLVQRC	19
MCIVCYKVFSLYC	19
MCDVLLYKLFRFC	19
MCHVILWRSWRYC	19
MCDCYPLLCLFLC	19
MCIYMQNGIGLRYAC	19
MCFVTLYKLLRCC	19
MCNEVKYFLPWKQNC	19
MCMVTLYKLLSAFC	19
MCLTYYRIFHKRTGC	19
MCKYLSYWRAWKSQC	19
MCVAKRLVSYWKAYC	19
MCIKYWLAFHRMC	19
MCFSPSVVKYYLACC	19
MCLGVCNRHALLYLC	19
MCHCFRVMCWLVC	19
MCLVHLVPGRLVFIC	19
MCPKWFILWRQHC	19
MCVVCYKVWRHTSRC	19
MCPVRQYYWLLYC	19
MCIFWPLMSIWLC	19
MCNRIAWPKYWLTMC	19
MCYLHNIHHMLIYC	19
MCLYRLSDFWVEC	18
MCKREVVYWRIFHAC	18
MCHYRHLIYYMIMC	18
MCLYRLSGFWVVC	18
MCERHLLYYLLHRVC	18
MCHYCFDKLFLCC	18
MCPILIYKVMFKC	18
MCIFRLSDFWAVC	18
MCYATYWFQMQYKNC	18
MCLYRLSDCWVVC	18
MCVLYWRLIQKSLHC	18
MCIYRWSDCWVVC	18
MCKYVQYYRAWRRWC	18
MCNRVLKYYIVWRKC	18
MCRLCFNRLFWCC	18
MCKRHLFYWKLIHC	18
MCRRTQYYRIMRSKC	18
MCCYRRWSLFWCC	35
MCIYRLSDFWVC	18
MCYTKAPFQHRWYPC	18
MCKYNRDLIFYRVFC	18
MCTRTSFYGFLYHAC	18
MCRHTQYYRFMRSKC	18
MCYEVLWYQYWRKVC	18
MCIYRFSDFCVVC	18
MCSNMWKLANCWWVC	18
MCIFRLSDFCVVC	18
MCPHRHLVYWKIWHC	18
MCTWRHVDYSFHYMC	18
MCVKRHFYGYYYWLC	18
MCFRWWLFHHLTPYC	18
MCIYRLSYFWVMC	18
MCEHKHPYHLFWQPC	18
MCTRRSFYGFWYYAC	18
MCMRHLQYFRSMRCC	18
MCYYCFNKLFLCC	18
MCRLCFSKFFWCC	31
MCPKIHLYYYLLHRC	18
MCRDFWHLWFRMC	18
MCAKWFVLYRQMVC	18
MCWITLYKVLHEC	18
MCICRLSDFWAVC	18
MCREIVYYLIVKRQC	18
MCTRTSFYSFWYHAC	18
MCSLTSFYGFWYYAC	18
MCNIIRYKIMKNRC	18
MCKHHLQYYCIWRLC	18
MCMARQIQYYRLWSC	18
MCYEVFWYTYNRRKC	18
MCTRTNFYGCWYYAC	18
MCARTSFYGFWYYDC	18
MCNEAKYFLLWKQNC	18
MCTWTNFYGFWYYAC	18
MCRHTQYYRMMRSKC	18
MCMRRLQYFRIMRCC	18
MCLVYIDQHLQFIC	18
MCKLITYWKVWQRKC	18
MCKHHLQYYRIWRQC	18
MCTRTNFYGFWCYAC	31
MCAKWVIVMKHLC	18
MCLYRSSDFWVVC	18
MCMRYLQYFRIMRCC	18
MCPKYLLLWRLMTC	18
MCRLCFSKLFWYC	18
MCPSWLIKLCLWNHC	18
MCPKWLLKWFLDC	18
MCKVVLYKLLRAC	18
MCSKRHLAYYLYMMC	18
MCPVLIYKLWRSC	18
MCPDVYLAYYLSFHC	18
MCDCLHVVCFLMC	18
MCDRHLYYYLAMHNC	18
MCPKWLSKWFLAC	18
MCYTKCFWCRHWSKC	18
MCESWITIYKVLKKC	18
MCRYYHRWLICQC	18
MCAKYFMLWRQFEC	18
MCAWYLAMLRAIRC	18
MCNIILYKNMKNRC	18
MCIYRLSDFWGLC	18
MCGKLIAYYRSFSTC	18
MCLRFVRFYQLMYC	18
MCKFVLLYKAATHMC	18
MCAKRAISLWRAWTC	18
MCILLYKVLRGWC	18
MCPKWFILWRQFC	18
MCRRHVKYWIVWRQC	18
MCFNDLVIKFFLC	18
MCHYPLDFFLVYC	18
MCNTRIYFWLLHC	18
MCRWDVTLYKLFRTC	18
MCQFKRTLQYYRAWC	18
MCINMVAYWRACSFC	18
MCSTLLYKVLSRC	18
MCRLCYSKLFWCC	30
MCTYRLSDFWVVCGC	17
MCTRTNFNGFWYYAC	17
MCIYRLSDFWCC	17
MCYHRHPFYRLWFKC	17
MCMARQIQYYRLCMC	17
MCIYRLTDFWVLC	17
MCHNNLVVKWLLFC	17
MCYYYKRSDFWVLRC	17
MCTRITQYYRPWKKC	17
MCIYRLSDYRVVC	17
MCVKKHLFYYLLHRC	17
MCRELYYYRLWHQC	17
MCRELFYYRFWQKTC	17
MCMRHLQYFRIMRC	17
MCNEVKYFLLWKQDC	17
MCSKWVQYYRIIRHC	17
MCDHRHPYVLYWLPC	17
MCIYRLSDYWAVC	17
MCKEVVLYKVLRLSC	17
MCTRTTQYYRLWKKC	17
MCHDKHLIYYMIMC	17
MCFVCFRHSFWCC	17
MCETHLNRWHFWWIC	17
MCFAKLWYQYQKLIC	17
MCLPRMIRYYQISYC	17
MCMVRQIQYYRLWMC	17
MCEHSYILHDRWRVC	17
MCTIILYKIMKNRC	17
MCRHTQYYRSMRSKC	17
MCMRHLQYCRIMRCC	17
MCKEVKYFLLWKQNC	17
MCVKRRHLYYYLLYC	17
MCNLYVSYYRAFKQC	17
MCYTYLWYQYQRKFC	17
MCLYRLSDIWVVC	17
MCIYRLSDCGVVC	17
MCCYRCWSLFWCCGC	17
MCYTVYWYRYIKRDC	17
[truncated: 617 more rows]

## Sheet: NNK_FGF-R4_X_FGF-R3C
Sequence	FGFR4_X_FGFR3C_reads_R5
MCIYRLSDFWVVC	70382
MCNIILYKIMKNRC	32472
MCEPWITIYKVLKKC	15105
MCVWPKWLTKFILRC	16235
MCYAKLWYQYQKLIC	12741
MCTRTSFYGFWYYAC	18804
MCHDRHLIYYMIMC	5840
MCPVLIYKLWRTC	8029
MCHVMYYRIMKSLAC	3722
MCPKYFLLWRLMTC	3633
MCTRITQYYRLWKKC	2829
MCAKWFVLYRQMMC	2720
MCPKWLLKWFLAC	3964
MCLISIYKVLKHC	2852
MCHRFVAWYRIWHRC	2988
MCSILLYKVLSRC	2477
MCYVTWYKVTKKLC	3003
MCHKLILLYKVARKC	2075
MCYNNLVVKWLLFC	2316
MCMAKRLVSYWKAYC	2275
MCIKMFLAHKRFC	2099
MCTRTNFYGFWYYAC	3422
MCRHTQYYRIMRSKC	1712
MCVWPKWLTKFILQC	1569
MCKATWEVVLYKLMC	1546
MCAKYFMLWRQFAC	1425
MCIYRLSDFWVMC	1524
MCWITLYKVLHAC	1447
MCYAKLWYQYQKLMC	1293
MCRLCFSKLFWCC	2195
MCVKYFTLWKNWC	1244
MCIYRLSDFWAVC	1409
MCYATYWFQMQYKKC	1216
MCHFRPNKFTAWLPC	1586
MCDRHLYYYLAMHKC	1180
MCDVLLYKLFRYC	1439
MCNVTIWKVLRLC	1187
MCSIILYKIMKNRC	1382
MCNRITIYKVLRRC	1698
MCDVLLYKLMLQWAC	1505
MCNVIVYKVLKKIC	1245
MCLYRLSDFWVVC	1095
MCYWPTWYRLMSKKC	952
MCVVCYKVWRHTLRC	1163
MCNEVKYFLLWKQNC	1105
MCSRFTPFHHWYC	1178
MCAKMFLRYWQIMCC	1199
MCLPRMIRYYQINYC	954
MCQFYLAMVAKIRC	1224
MCNWIQYYKIMVRKC	879
MCKYETMWYQYMYKC	854
MCKHHLQYYRIWRLC	1167
MCQRYTKFHAYFC	966
MCMRHLQYFRIMRCC	917
MCVYRLSDFWVVC	1002
MCWPSIVVKAMLRC	857
MCPRWIYYYMLHC	799
MCPLHMRRGMAMFVC	940
MCDKCVTFWKAWMYC	834
MCTRTSFYGFWYHAC	1211
MCRNLVVYWRAFYC	797
MCKWHILLYQIHNRC	864
MCRTMDVIVFKLMYC	706
MCHSNLIIKWLLSC	851
MCMARQIQYYRLWMC	606
MCTNRKLVWLYKVAC	899
MCNNYIIFYKIMKC	651
MCKAVIDLYIAYKTC	597
MCPRRVLQYYRLWNC	647
MCPKWFILWRQLC	758
MCVFDSFLPFIIC	1034
MCVKCWLAYIRTC	601
MCNIILYKIMKNHC	567
MCPSWLIKLCLWNRC	703
MCSITIYKLLRFC	619
MCNILLYKILSVC	686
MCVTLYRAYCSQWVC	527
MCDVLVYKVLWAC	518
MCFVTLYKLLKCC	551
MCPYSITFYKVFRHC	536
MCHVMYYRIMKSLTC	486
MCGWPSWIYKYLRTC	634
MCDIILYKIMKNRC	547
MCAPKWLIKVLLC	433
MCYLVKHRDFSRHVC	575
MCPLRIVAYYRAYKC	405
MCVYDIFVPFIIC	658
MCLYDSFLPFIFC	580
MCFSPSVVKYYLAFC	446
MCIYRLSDLWVVC	556
MCRNISYYLAWHKKC	374
MCPVLLWKILYMC	365
MCRYYHRWLICHC	438
MCRWDVTLYKLFRMC	402
MCHVMYYRIMKSLVC	391
MCWPRAIVYYKLFRC	476
MCPVRQYYWLLFC	415
MCRVYPVKCYIVFC	400
MCMVTLYKLLSALC	463
MCEPWITIYKVLRKC	458
MCRTLSFYLAWHQNC	405
MCCKRDIIYWLLMKC	336
MCSKWVQYYRVIRHC	407
MCSISCFYHLMFC	402
MCHYCFNKLFLCC	673
MCPICLYKIMYLC	333
MCDCLHVVCFLVC	359
MCTYRLSDFWVVC	472
MCPILIYKVLFKC	319
MCPRYFWYHYLLC	436
MCMRTIQMYRIYRC	444
MCNIILYKIMKNPC	380
MCNNITIYKIMKLC	382
MCQFRFSKFWLSC	306
MCPVIIYKILSHC	369
MCTCYPLLCWLLC	348
MCDRHLYYYLAMHMC	277
MCLACLYKVLKMC	288
MCYKLFLLWKQCC	400
MCMKTFQYWRIWHRC	282
MCFRWRLFHHLTPFC	417
MCRFIIKAFLNLC	361
MCMRTMHVLMWKTTC	305
MCLYDFVGSDLFIYC	360
MCDWAMVRWYRMYC	303
MCYYWTYIYEKQQTC	282
MCSRYVTFYRAFLSC	511
MCEPWITIYKVLKNC	367
MCIYWDLWYKMNRRC	322
MCKKHLLYYLIAC	361
MCEITLFKLLHSLC	347
MCLRMLEMYLVHARC	256
MCYEILIYKIQKTHC	288
MCTYLAYYLSFHRC	402
MCIAIYKLMKMHC	276
MCDCHPLLCFLLC	393
MCTKRMLLYYLVHMC	276
MCIYRLSDFWVAC	323
MCLISIYKVLKQC	257
MCKRLLYYWLTYKRC	279
MCPKYFLLWRLMMC	230
MCNIILYKIMRNRC	307
MCPIIAYKVLFMC	226
MCTPHILIYKIMYC	267
MCTFDTFLPFIFC	304
MCNITLYKIMKNRC	282
MCPNAIIFYKVMCC	317
MCTKKTLLYYMLTCC	307
MCIFDNWLPFIYC	285
MCHCFPTICWLVC	230
MCSKSCVFYHLLFC	235
MCIFDIHMPFIPC	507
MCDSFAILYYKINC	242
MCYVTWYKVTKKRC	277
MCVYDLFLPFIYC	420
MCNRHEVKYWLVFKC	212
MCNEVKYFLLWKQKC	199
MCYAKLWYQYQKLTC	284
MCKYLSYWRAWKSRC	245
MCKRMIKYWMMYC	244
MCVWPKWLTKFILLC	230
MCIFDTFLPFIFC	325
MCWWTKNHIFWNKKC	191
MCVWPKWLTKLILRC	245
MCPVLIYKLWRIC	210
MCYEKLWYVLMRRVC	204
MCHVRYWQVWKRC	202
MCLTYYLLFRKMMHC	214
MCKRLVLYYKLFC	215
MCWILYYKLFKKKKC	183
MCMKKKHIMIYRATC	213
MCNVIVYKVLKKMC	183
MCIHLAYYKLFHKQC	184
MCYLRWTQYYRALHC	217
MCPKWLLKWFLTC	227
MCIYRLPDFWVVC	216
MCEPWITIYKVLKRC	176
MCKWSDLIIKAFVLC	181
MCRDFWHLWFRVC	174
MCIYRLSDFWVLC	381
MCLVSIYKIMRTC	189
MCCYRCWSLFWCC	331
MCEPWITIYKVLKMC	165
MCPEKWVKYYLVALC	165
MCWITLYKVLHMC	176
MCPVLIYKLWRMC	164
MCRWVHYWQIMRKIC	187
MCFASLWYRVQCC	214
MCNIILYKIMKSRC	225
MCTFDLFLPFIFC	326
MCFTRHPFARKWISC	176
MCTRMVTFYKVLC	225
MCWWFMPELVLMC	159
MCVKYFTLWKNCC	250
MCYGQRMTLLTRLLC	197
MCWITLYKVLHTC	166
MCFCVVPGFYTLC	163
MCYRNLVAYYKAAIC	187
MCYRLIRYWQLVQKC	153
MCNIILYKVMKNRC	228
MCPERLFYWLLVC	153
MCTRTSFYGFWYYDC	209
MCDVLLYKLMLQWTC	203
MCSKYPVFCYLLWC	152
MCLSNIVLWKVLYC	168
MCTGIFCFTRFFLC	170
MCYWRLWCMLKPSKC	150
MCMQRAIRYYMLYMC	150
MCILLYKVLRGCC	169
MCPVTLYKILQLCC	182
MCNTLCFYTILFC	177
MCTRTSFYGFWYYTC	283
MCNIIPYKIMKNRC	185
MCRYLTYYLHMRTHC	183
MCIYRLSDFWIVC	182
MCSILLYKVLSQC	143
MCVWPKWLTKFILWC	143
MCHCFPLLCSFLC	168
MCPKYFLLWRLMKC	140
MCSRTSFYGFWYYAC	266
MCNIILYKITKNRC	178
MCQWKKQLLYYLIQC	139
MCVLYMFARYRC	179
MCIACWKVWKWSLC	137
MCIYRSSDFWVVC	168
MCNATWYLAMYRAFC	159
MCNHRFPYFTRFWYC	164
MCIKMFLAHKRLC	151
MCYSKLILKAFLLC	200
MCIYRLSDFRVVC	203
MCPRRVLQYYRLWKC	131
MCIYRLSDFCVVC	168
MCSCFPPLCFLIC	150
MCMLVKHVLLYKSMC	135
MCPNLFLAYYLAFC	150
MCRRFEVLLFKIAC	151
MCFPTFIIKSFLLC	154
MCSCYPVLCFLLC	204
MCIHRLSDFWVVC	156
MCIYRLSDSWVVC	150
MCWVKYWTVYKQC	124
MCTRTSFYGFRYYAC	294
MCIYRLSDFWVVCGC	162
MCPRWLIKLVLSC	122
MCDAHRLLFELIC	145
MCMAKRLVSYWKAFC	130
MCAKYFYIWATCC	133
MCLAYYRSFCTFGVC	118
MCNIILYKTMKNRC	154
MCEFYRAMQRRLQC	125
MCNIILYKIMKDRC	145
MCIYRLSDFLVVC	150
MCITPPFRLWFVC	155
MCIKMFLAHKRYC	128
MCNFYRWMLRRINC	131
MCHCFPLLCHLFC	123
MCHVQYYRAFLSTHC	141
MCYVTWYKVTKKHC	127
MCPKWLIKMLLNC	134
MCNALLYKIMHTQKC	110
MCVKYYLIMKSLC	109
MCRMACYYALYMQRC	133
MCYKRMLQYYKVHRC	139
MCNTILYKIMKNRC	121
MCQLTYTKFWLRC	130
MCIYRLSDVWVVC	129
MCQLVFSRYFLKC	106
MCILWYKLVKQKC	105
MCIWPKWLTKFILRC	118
MCWAKYWYVVQKKNC	122
MCYAKLWYQYQKRIC	153
MCYCMKPVCWLIC	126
MCMRHILYYLLCC	122
MCIYRLSGFWVVC	120
MCHCFPIVCWFEC	103
MCKQRLLVYYLAHIC	124
MCFHPAIVKAFLLCC	132
MCVTLYRAYCSQWMC	102
MCAWLTKWFIHQC	106
MCVTWYKVTKLRC	109
MCYNNLVVKWLLLC	153
MCAWPKWLTKFILRC	121
MCNIILHKIMKNRC	124
MCTRTSFYGFWYYVC	206
MCYAKLWYQYQRLIC	106
MCKRMTYYYLLFC	113
MCIYRLSDFWGVC	110
MCKPWITIYKVLKKC	97
MCQFQYWKYWLCC	111
MCSCAPVLCFLLC	118
MCNIILYKIMKNCC	124
MCKWQRHVIYYKVQC	95
MCERWITIWKVSRHC	118
MCFYRLSDFWVVC	116
MCEPRITIYKVLKKC	113
MCHYITYYKLMMALC	123
MCVARMTLYYRHMCC	121
MCSHRHPYVLFWSPC	93
MCYHSLTTHIMIYC	109
MCNRWITYYQVAHAC	152
MCIAIYKLMKMQC	92
MCIYRLSDFWVIC	147
MCRRFITYYMLTRKC	92
MCPVLIYKLWRNC	100
MCSVLAYKVMVMC	91
MCPRWLVKLMLMC	91
MCERLVMLYRSWLFC	102
MCNVTIWKVLRMC	90
MCNIILYRIMKNRC	112
MCTRLLMYYRAFC	104
MCRLCFNKLFWCC	167
MCPVLIYKLWRAC	120
MCPDWLIKFYLMC	89
MCVWPKWLTKFILPC	109
MCSVLLYKVLC	89
MCTHIQFYRSMMRSC	89
MCNIILYKIMENRC	116
MCKAIKYALIWMTNC	103
MCYAKLWYQYQKLVC	107
MCRTLSFYLAWHQKC	87
MCNVILYKIMKNRC	120
MCIYRLSNFWVVC	104
MCLERKLLLYYKLFC	101
MCSRHLLYYMIYC	98
MCAKYFMLWRQFVC	85
MCEPWVTIYKVLKKC	84
MCPYSITFYKVFRQC	84
MCIYRLSEFWVVC	94
MCLTQLYRFAIYC	101
MCKRTLLYWLMFC	112
MCERFVTYYKLFC	95
MCARTSFYGFWYYAC	187
MCQREVTYWRYWKLC	115
MCIKMFLAHKRIC	91
MCRCLHYWKLWNRRC	95
MCWAKYWYVVQKKKC	81
MCWWMKNHIFWNKKC	80
MCLCFSGMLVYHC	90
MCEPWITIYKVSKKC	79
MCPERLFYWLLMC	79
MCKHIMLYKAAYC	91
MCEPWITIYKVLKTC	85
MCHGRHLIYYMIMC	79
MCQWKKQLLYYLIHC	138
MCVWPRWLTKFILRC	92
MCVTNAKFFSHLAC	78
MCEPWITIYKVLKEC	78
MCWPEWLKKYVIINC	87
MCQFKRTLQYYKAWC	77
MCPLYMRLGLAVNLC	84
MCEPWITIYKALKKC	77
MCYAKLWYQYQKLNC	84
MCEPWITIHKVLKKC	76
MCYAKLWYQYQKPIC	86
MCDRHLYYYLAMHRC	75
MCLISIYKVLKRC	98
MCSNMWKLANRWWVC	110
MCEPWITTYKVLKKC	73
MCIFDLFCPFIVC	73
MCHLLFYRVWRAC	106
MCRFIVKAFLAMC	78
MCRHVLYFRIMSTC	71
MCMVTLYKLLSAHC	71
MCFWPVYYTIMCC	103
MCVWPKWLTKFILHC	102
MCTCYPIICYLSC	71
MCPNPTLFYYLLWC	70
MCRHHLLYYLIFC	84
MCLALLYKIFSHC	79
MCPVIIYKILSRC	84
MCHNKLLTYYLVFC	80
MCDCVWPLCWMTC	98
MCVYDIFVPFIFC	86
MCVFDSFLPFILC	85
MCVWPKWLTKFTLRC	76
MCTSYTIFHTFYC	77
MCNIILYKIMKNLC	76
MCRSVLYYTLMCC	92
MCVTYYKILRKLLC	69
MCVFDSFLPFVLC	75
MCTHRLYYLVMRNKC	68
MCNVTIWKVLRSC	68
MCTVWIFCVKSRSC	74
MCQKKLWLLYYKVFC	75
MCHRWEVVKWFLRFC	87
MCPMIVKLCYVVDC	89
MCAYWVRDVLYLC	67
MCNIVLYKIMKNRC	94
MCSCFPLVCWLSC	67
MCWVTYWKVMRTC	74
MCRVTHYYRIWIKKC	67
MCWKFIWSLRSHC	76
MCIYRLSDFWVGC	105
MCSHRQYLAYYLAFC	66
MCPVLFYKVFYTC	73
MCQFTYSKFFFC	65
MCMTNVIASAALKWC	65
MCYNNLVVKWLLYC	70
MCVRPKWLTKFILRC	86
MCFKLALLWEQCC	90
MCARITQYYRLWKKC	65
MCAFYRAMSRRLKC	64
MCSYCFNKLFLCC	122
MCVSYWRAWCWSMLC	78
MCNIILCKIMKNRC	87
MCHLFYYKLFHSC	91
MCFKHPWFFAWLC	64
MCLIPKLFHLWRTNC	76
MCGVILYKVLSVC	74
MCPWPMWLTKWVC	63
MCNIILYKIMKNQC	63
MCIYHLSDFWVVC	71
MCLFDSFVPFIFC	89
MCAKMFLRYWQIMWC	62
MCAKMFLRYWQIMRC	75
MCSKWVQYYRVIRQC	62
MCNIILYKIMKYRC	74
MCEPWITIYKVLEKC	61
MCEFYRAMQRRLKC	61
MCLFDTFLPFIFC	95
MCPVLIYKLWRKC	61
MCYVTWYKVTKKQC	61
MCHPTRLHLWLCCNC	95
MCVVCYKVWRHTLQC	60
MCSCVYVMCYLIC	75
MCTLTSFYGFWYYAC	83
MCNIILYKLMKNRC	70
MCMVTLYKVFHFC	60
MCIYRLLDFWVVC	67
MCHAKLWYQYQKLIC	68
MCWPLLYKILSFC	71
MCNIILYKIVKNRC	76
MCIAIYKLMKMRC	70
MCDVLLYKLLRYC	65
MCDVLLYKLMLQWDC	59
MCKRMLLYYFLAC	84
MCEPWITIYRVLKKC	59
MCIYRLSDFWDVC	84
MCTCYPLLCWLHC	59
MCNRITIYKVLRHC	67
MCHKLISLYKVARKC	58
MCTKRMLLYYLVHKC	58
MCFWPDTKMLVVWMC	58
MCYAKLWYQHQKLIC	68
MCVFDLFLPFIFC	81
MCHVMYYRIMKSLEC	58
MCHITIYKILRSC	121
MCNIILYEIMKNRC	71
MCVWPKWLTRFILRC	57
MCKQILYWMIWKRC	72
MCVTYYKAWHSMC	62
MCHFYSIMMRKIRHC	56
MCHDRHLIYYMITC	56
MCYAKLWYQYRKLIC	66
MCHRFVAWYRIWHHC	61
MCMKNIWYYLVWKKC	55
MCFALLYKILSLC	60
MCVKYWLAMARTC	82
MCTHLFYYQLWIKKC	55
MCRELLYYLLQRC	65
MCAKYIMVWRHLC	54
MCNEVKYFLLWKQYC	64
MCPKWLLKWFLVC	72
MCWITLYKVLHVC	54
MCYAKPWYQYQKLIC	61
MCYLYRFAVFC	65
MCHNRHLIYYMIMC	53
MCNRITIYKVLRPC	60
MCGPWITIYKVLKKC	53
MCPKMWLAYLRLC	53
MCVWPKRLTKFILRC	87
MCIYCLSDFWVVC	66
MCYEKLWYVLMRRMC	53
MCNTSIIIYKIMKC	52
MCHSNLIIKWLLFC	57
MCLSVRHVLFYKTVC	75
MCDIYRFMRYTC	72
MCVFDSFLPFIFC	133
MCIYRLSDCWVVC	65
MCYAKLWYQYQKLFC	51
MCVKMRLLWMQHC	58
MCVWPKWPTKFILRC	51
MCYAKLRYQYQKLIC	91
MCVWPKWLTKSILRC	51
MCSALLYKIFARC	59
MCYYWTYIYEKQQKC	50
MCYDNVILYKILFC	56
MCLTYYLLHQRRLHC	65
MCFWPIWYKFMAC	50
MCQKMVWLWKATQNC	58
MCPVIIYKILSQC	49
MCRHTQYYRIMRSMC	49
MCEPWTTIYKVLKKC	49
MCTWPAFLQKIFLFC	55
MCHFYSIMMRKIRPC	76
MCDVLLYKLMLQWVC	61
MCHVMYYRIMKSLMC	49
MCIKTFLLWRSSC	74
MCVVYYRIMWSRC	60
MCNMLCTRLVLLWKC	49
MCTLLHRLFLMSHKC	49
MCMKTFQYWRIWHMC	49
MCKIIWYKVHKTC	49
MCIYRLSDYWVVC	57
MCNAKLWYQYQKLIC	48
MCHIILYKIMKNRC	56
[truncated: 2,399 more rows]
