# Supplementary material for: Identification and engineering of potent cyclic peptides with selective or promiscuous binding through biochemical profiling and bioinformatic data analysis
Source: Royal Society of Chemistry journal article supplement (doi:10.1039/d3cb00168g), 2023-11-14
Supplement: d3cb00168g2.pdf [file d3cb00168g2.pdf]

| Sequence (NNK HT screen peptides) | Calculated mass |          |          |          |          | Found mass |
|-----------------------------------|-----------------|----------|----------|----------|----------|------------|
|                                   | [M+H]/1         | [M+2H]/2 | [M+3H]/3 | [M+4H]/4 | [M+5H]/5 |            |
| ZMCWFMPLELVLCGSGSDYKDDDDK         | 3009.4          | 1505.2   | 1003.8   | 753.1    | 602.7    | 1004.1     |
| ZMCFWRFFPALLACGSGSDYKDDDDK        | 2928.3          | 1464.7   | 976.8    | 732.8    | 586.5    | 976.7      |
| ZMCIKMFLAHKRF CGSGSDYKDDDDK       | 2951.4          | 1476.2   | 984.5    | 738.6    | 591.1    | 984.2      |
| ZMCDAHRLLELICGSGSDYKDDDDK         | 2887.2          | 1444.1   | 963.1    | 722.5    | 578.2    | 962.9      |
| ZMCDCHPLLCFLLCGSGSDYKDDDDK        | 2834.2          | 1417.6   | 945.4    | 709.3    | 567.6    | 945.2      |
| ZMCSCFPPLCFLICGSGSDYKDDDDK        | 2800.2          | 1400.6   | 934.1    | 700.8    | 560.8    | 131.4      |
| ZMCDCLHVVCFLVCGSGSDYKDDDDK        | 2808.2          | 1404.6   | 936.7    | 702.8    | 562.4    | 200.1      |
| ZMCHCFPTICWLVCGSGSDYKDDDDK        | 2879.2          | 1440.1   | 960.4    | 720.6    | 576.6    | 960.4      |
| ZMMVKCWLAYIRTCGSGSDYKDDDDK        | 2941.3          | 1471.2   | 981.1    | 736.1    | 589.1    | 980.6      |
| ZMCVKMWLAYIRTCGSGSDYKDDDDK        | 2941.3          | 1471.2   | 981.1    | 736.1    | 589.1    | 122.9      |
| ZMCVKCWLAYIRTMGSGSDYKDDDDK        | 2941.3          | 1471.2   | 981.1    | 736.1    | 589.1    | 112.8      |
| ZMCSHMWLFKVLVLCGSGSDYKDDDDK       | 2934.4          | 1467.7   | 978.8    | 734.3    | 587.7    | 130.3      |
| ZMMSHCWLFKVLVLCGSGSDYKDDDDK       | 2934.4          | 1467.7   | 978.8    | 734.3    | 587.7    | 129.1      |
| ZMCSHCWLFKVLVLMGSGSDYKDDDDK       | 2934.4          | 1467.7   | 978.8    | 734.3    | 587.7    | 113.1      |
| ZMCHCFPTICWLECGSGSDYKDDDDK        | 2909.2          | 1455.1   | 970.4    | 728.1    | 582.6    | 969.6      |
| ZMCIYRLSDFWVVCGSGSDYKDDDDK        | 2958.3          | 1479.6   | 986.8    | 740.3    | 592.5    | 986.9      |
| ZMCRDFWHLWFRVCGSGSDYKDDDDK        | 3122.4          | 1561.7   | 1041.5   | 781.4    | 625.3    | 1041.2     |
| ZMCDVLLYKLFRCGSGSDYKDDDDK         | 2990.3          | 1495.7   | 997.4    | 748.3    | 598.9    | 997.3      |
| ZMCDVLVYKVLWACGSGSDYKDDDDK        | 2866.2          | 1433.6   | 956.1    | 717.3    | 574.0    | 956.3      |
| ZMCFWPIWYKFMACGSGSDYKDDDDK        | 3049.4          | 1525.2   | 1017.1   | 763.1    | 610.7    | 131.0      |
| ZMCFVTLYKLLKCGSGSDYKDDDDK         | 2948.3          | 1474.7   | 983.4    | 737.8    | 590.5    | 983.6      |
| ZMCERFVTYKLLFCGSGSDYKDDDDK        | 3026.3          | 1513.7   | 1009.4   | 757.3    | 606.1    | 1009.4     |
| ZMCAPKWLKIVLSCGSGSDYKDDDDK        | 2815.2          | 1408.1   | 939.1    | 704.6    | 563.8    | 938.7      |
| ZMCPKWLKIVLLNCGSGSDYKDDDDK        | 2884.3          | 1442.7   | 962.1    | 721.8    | 577.7    | 962.0      |
| ZMCNIIYKIMKNRCGSGSDYKDDDDK        | 3066.5          | 1533.8   | 1022.8   | 767.4    | 614.1    | 1022.9     |
| ZMCLVSIYKIMRTCGSGSDYKDDDDK        | 2884.3          | 1442.6   | 962.1    | 721.8    | 577.7    | 962.2      |
| ZMCSITIKLLRFCGSGSDYKDDDDK         | 2914.3          | 1457.6   | 972.1    | 729.3    | 583.7    | 972.6      |
| ZMCEPWITIKVLLKCGSGSDYKDDDDK       | 3178.6          | 1589.8   | 1060.2   | 795.4    | 636.5    | 1059.8     |
| ZMCHITIKILRSCGSGSDYKDDDDK         | 2904.3          | 1452.6   | 968.8    | 726.8    | 581.7    | 968.4      |
| ZMCQFTYSKFFCGSGSDYKDDDDK          | 2875.1          | 1438.1   | 959.0    | 719.5    | 575.8    | 958.6      |
| ZMCPVIIYKILSHCGSGSDYKDDDDK        | 2843.2          | 1422.1   | 948.4    | 711.6    | 569.4    | 948.4      |
| ZMCFALLYKILRCGSGSDYKDDDDK         | 2884.3          | 1442.6   | 962.1    | 721.8    | 577.7    | 114.1      |
| ZMCYKLFLLWKQWCGSGSDYKDDDDK        | 3085.5          | 1543.2   | 1029.2   | 772.1    | 617.9    | 131.1      |
| ZMCPKWLKWLFLACGSGSDYKDDDDK        | 2962.4          | 1481.7   | 988.1    | 741.3    | 593.3    | 988.5      |
| ZMCVKYFTLWKNWCGSGSDYKDDDDK        | 3045.4          | 1523.2   | 1015.8   | 762.1    | 609.9    | 1016.4     |
| ZMCSCFPPLCELMCGSGSDYKDDDDK        | 2800.2          | 1400.6   | 934.1    | 700.8    | 560.8    | 875.4      |
| ZMCSILLYKVLSCGSGSDYKDDDDK         | 2824.2          | 1412.6   | 942.1    | 706.8    | 565.6    | 941.9      |
| ZMCIYRLSDFWAVCGSGSDYKDDDDK        | 2930.2          | 1465.6   | 977.4    | 733.3    | 586.8    | 977.1      |
| ZMCYKLFLLWKQCGSGSDYKDDDDK         | 2899.3          | 1450.1   | 967.1    | 725.6    | 580.7    | 200.1      |
| ZMCGVLLYKVMRVCGSGSDYKDDDDK        | 2838.3          | 1419.6   | 946.8    | 710.3    | 568.5    | 946.6      |
| ZMCYLRFVAVFCGSGSDYKDDDDK          | 2739.0          | 1370.0   | 913.7    | 685.5    | 548.6    | 914.5      |
| ZMCIAIYKLMKMHCGSGSDYKDDDDK        | 2908.4          | 1454.7   | 970.1    | 727.8    | 582.5    | 1163.8     |
| ZMCNIIYKIMKNRCGSGSDYKDDDDK        | 3066.5          | 1533.8   | 1022.8   | 767.4    | 614.1    | 1023.1     |
| ZMCNIIIRCGSGSDYKDDDDK             | 2288.5          | 1144.8   | 763.5    | 572.9    | 458.5    | 763.3      |
| ZMCNIIYKILSVCGSGSDYKDDDDK         | 2836.2          | 1418.6   | 946.1    | 709.8    | 568.0    | 945.9      |
| ZMCNVTIWKVLRRLCGSGSDYKDDDDK       | 2902.3          | 1451.6   | 968.1    | 726.3    | 581.3    | 967.6      |
| ZMCVWPKWLTKLICGSGSDYKDDDDK        | 2944.4          | 1472.7   | 982.1    | 736.8    | 589.7    | 982.2      |
| ZMCPKYFLLWRLMTCGSGSDYKDDDDK       | 3128.6          | 1564.8   | 1043.5   | 782.9    | 626.5    | 1043.7     |
| ZMCPRWIYYMYMLHCGSGSDYKDDDDK       | 3102.5          | 1551.7   | 1034.8   | 776.4    | 621.3    | 1034.5     |
| ZMCDWPRWLVKVVCGSGSDYKDDDDK        | 2958.3          | 1479.7   | 986.8    | 740.3    | 592.5    | 986.2      |
| ZMCPRYFYWHYLLCGSGSDYKDDDDK        | 3118.4          | 1559.7   | 1040.1   | 780.4    | 624.5    | 1040.2     |
| ZMCQFRFSKFWLSCGSGSDYKDDDDK        | 3006.3          | 1503.7   | 1002.8   | 752.3    | 602.1    | 1003.1     |
| ZMCIYRLSDFWVECGSGSDYKDDDDK        | 2988.2          | 1494.6   | 996.7    | 747.8    | 598.4    | 996.8      |
| ZMCHYISDWLVCGSGSDYKDDDDK          | 2593.8          | 1297.4   | 865.3    | 649.2    | 519.6    | 864.9      |
| ZMCGHFSITWFKWCGSGSDYKDDDDK        | 2969.2          | 1485.1   | 990.4    | 743.1    | 594.6    | 990.4      |
| ZMCFVFTGMSIWCIGSGSDYKDDDDK        | 2900.2          | 1450.6   | 967.4    | 725.8    | 580.8    | 200.2      |
| ZMCHITIKILRYCGSGSDYKDDDDK         | 2980.3          | 1490.7   | 994.1    | 745.8    | 596.9    | 993.6      |
| ZMCWVKYWTYKQCGSGSDYKDDDDK         | 3061.4          | 1531.2   | 1021.1   | 766.1    | 613.1    | 1020.9     |
| ZMCHCFPIVCWFECGSGSDYKDDDDK        | 2941.3          | 1471.1   | 981.1    | 736.1    | 589.1    | 980.1      |
| ZMCDCVWPLCWMTCGSGSDYKDDDDK        | 2914.3          | 1457.6   | 972.1    | 729.3    | 583.7    | 131.3      |
| ZMCVTWYKVTKLRCGSGSDYKDDDDK        | 2954.3          | 1477.6   | 985.4    | 739.3    | 591.7    | 985.4      |
| ZMCIKTFLLWRS SCGSGSDYKDDDDK       | 2911.3          | 1456.1   | 971.1    | 728.6    | 583.1    | 971.2      |
| ZMCHVILWRSWRYCGSGSDYKDDDDK        | 3076.4          | 1538.7   | 1026.1   | 769.9    | 616.1    | 1026.2     |
| ZMCPVLIYKLWRTCIGSGSDYKDDDDK       | 2949.3          | 1475.2   | 983.8    | 738.1    | 590.7    | 1179.4     |
| ZMCIHRLSDFWVVCGSGSDYKDDDDK        | 2932.2          | 1466.6   | 978.1    | 733.8    | 587.2    | 978.1      |
| ZMCYKLFLLWKQRCGSGSDYKDDDDK        | 3055.5          | 1528.2   | 1019.2   | 764.6    | 611.9    | 1019.2     |
| ZMCSILLYKVLSCGSGSDYKDDDDK         | 2852.2          | 1426.6   | 951.4    | 713.8    | 571.2    | 951.5      |
| ZMCLISYKVLKHCIGSGSDYKDDDDK        | 2874.3          | 1437.6   | 958.8    | 719.3    | 575.7    | 958.6      |

|                               |        |        |        |       |       |        |
|-------------------------------|--------|--------|--------|-------|-------|--------|
| ZMCWITLYKVLHACGSGSDYKDDDDK    | 2904.2 | 1452.6 | 968.7  | 726.8 | 581.6 | 969.2  |
| ZMCILLYKVLRRGCGSGSDYKDDDDK    | 2891.3 | 1446.2 | 964.4  | 723.6 | 579.1 | 964.5  |
| ZMCFASLWYRVQCGSGSDYKDDDDK     | 2933.2 | 1467.1 | 978.4  | 734.1 | 587.4 | 159.0  |
| ZMCHLAYLAFRSCGSGSDYKDDDDK     | 2901.2 | 1451.1 | 967.7  | 726.0 | 581.0 | 967.9  |
| ZMCVAFYRAFMA SCGSGSDYKDDDDK   | 2823.1 | 1412.1 | 941.7  | 706.5 | 565.4 | 942.1  |
| ZMCVSYRAYFAHCGSGSDYKDDDDK     | 2937.2 | 1469.1 | 979.7  | 735.0 | 588.2 | 979.7  |
| ZMCKKHLLYLIA CGSGSDYKDDDDK    | 2922.3 | 1461.7 | 974.8  | 731.3 | 585.3 | 975.2  |
| ZMCLAYLAFHSLCGSGSDYKDDDDK     | 2858.1 | 1429.6 | 953.4  | 715.3 | 572.4 | 1143.5 |
| ZMCRELLYYLLQR CGSGSDYKDDDDK   | 3027.4 | 1514.2 | 1009.8 | 757.6 | 606.3 | 1211.2 |
| ZMCVKYYLIMKSLCGSGSDYKDDDDK    | 2918.3 | 1459.7 | 973.4  | 730.3 | 584.5 | 973.2  |
| ZMCSTRFVNLFWL CGSGSDYKDDDDK   | 2943.3 | 1472.1 | 981.8  | 736.6 | 589.5 | 981.7  |
| ZMCVPCFSHTFLC CGSGSDYKDDDDK   | 2814.1 | 1407.6 | 938.7  | 704.3 | 563.6 | 938.1  |
| ZMCWYCFRKSFWC CGSGSDYKDDDDK   | 3086.4 | 1543.7 | 1029.5 | 772.4 | 618.1 | 1029.0 |
| ZMCYRFPSSHFWACGSGSDYKDDDDK    | 3071.4 | 1536.2 | 1024.5 | 768.6 | 615.1 | 1024.5 |
| ZMCIRWPARQSLFWL CGSGSDYKDDDDK | 3233.6 | 1617.3 | 1078.5 | 809.2 | 647.5 | 1078.8 |
| ZMCFRWRLFHHLTPYCGSGSDYKDDDDK  | 3333.7 | 1667.4 | 1111.9 | 834.2 | 667.5 | 1111.6 |
| ZMCSNMWKLANRW WACGSGSDYKDDDDK | 3223.6 | 1612.3 | 1075.2 | 806.6 | 645.5 | 1074.9 |
| ZMCPERLFYVLLVCGSGSDYKDDDDK    | 2996.4 | 1498.7 | 999.5  | 749.8 | 600.1 | 999.0  |
| ZMCWPILWKVLSACGSGSDYKDDDDK    | 2873.2 | 1437.1 | 958.4  | 719.1 | 575.4 | 958.2  |
| ZMCIFDLFLPFIFCGSGSDYKDDDDK    | 2932.3 | 1466.7 | 978.1  | 733.8 | 587.3 | 977.7  |
| ZMCHYCFNKFLFLC CGSGSDYKDDDDK  | 2948.3 | 1474.7 | 983.4  | 737.8 | 590.5 | 982.4  |
| ZMCQQWNLYTRHW HSCGSGSDYKDDDDK | 3316.5 | 1658.8 | 1106.2 | 829.9 | 664.1 | 1105.9 |
| ZMCHPTRLHLWLCCNCGSGSDYKDDDDK  | 3153.5 | 1577.3 | 1051.8 | 789.1 | 631.5 | 1051.7 |
| ZMCFKHPWFFAWL CGSGSDYKDDDDK   | 3039.4 | 1520.2 | 1013.8 | 760.6 | 608.7 | 1013.9 |
| MCSNMWKLANRW WACGSGSDYKDDDDK  | 3181.5 | 1591.3 | 1061.2 | 796.1 | 637.1 | 1061.1 |
| MCIRWPARQSLFWL CGSGSDYKDDDDK  | 3191.6 | 1596.3 | 1064.5 | 798.6 | 639.1 | 1064.4 |
| MCLFDLHLPFIFCGSGSDYKDDDDK     | 2880.3 | 1440.6 | 960.8  | 720.8 | 576.9 | 960.9  |
| MCIFDNWLPFIYCGSGSDYKDDDDK     | 2946.3 | 1473.6 | 982.8  | 737.3 | 590.1 | 982.8  |
| MCYFDPHFIFPCGSGSDYKDDDDK      | 2914.2 | 1457.6 | 972.1  | 729.3 | 583.6 | 972.4  |
| MCFFCFDRFLCCGSGSDYKDDDDK      | 2929.3 | 1465.2 | 977.1  | 733.1 | 586.7 | 1244.7 |
| MCVDFSFLPFIICGSGSDYKDDDDK     | 2816.2 | 1408.6 | 939.4  | 704.8 | 564.0 | 939.5  |
| MCFYCFDSLFLCCGSGSDYKDDDDK     | 2876.2 | 1438.6 | 959.4  | 719.8 | 576.0 | 958.5  |
| MCVFDWLPFVYCGSGSDYKDDDDK      | 2891.2 | 1446.1 | 964.4  | 723.5 | 579.0 | 964.3  |
| MCIFDTHMPFIPCGSGSDYKDDDDK     | 2836.2 | 1418.6 | 946.1  | 709.8 | 568.0 | 945.8  |
| MCIFDTLFPFIFCGSGSDYKDDDDK     | 2878.2 | 1439.6 | 960.1  | 720.3 | 576.4 | 960.0  |
| MCFVCFRHSFWCCGSGSDYKDDDDK     | 2950.3 | 1475.6 | 984.1  | 738.3 | 590.9 | 113.2  |
| MCCYNLFSLFWACGSGSDYKDDDDK     | 2882.2 | 1441.6 | 961.4  | 721.3 | 577.2 | 240.5  |
| MCIRWPARQSLFWICGSGSDYKDDDDK   | 3191.6 | 1596.3 | 1064.5 | 798.6 | 639.1 | 1064.4 |
| MCRLCFSKLFWYCGSGSDYKDDDDK     | 2981.4 | 1491.2 | 994.5  | 746.1 | 597.1 | 239.2  |
| MCLLWTRHFDRYWVCGSGSDYKDDDDK   | 3310.7 | 1655.8 | 1104.2 | 828.4 | 662.9 | 1104.3 |
| MCFRWRLFHHLTPYCGSGSDYKDDDDK   | 3291.7 | 1646.3 | 1097.9 | 823.7 | 659.1 | 1097.9 |
| MCIFDIHMPFIFPCGSGSDYKDDDDK    | 2848.2 | 1424.6 | 950.1  | 712.8 | 570.4 | 950.0  |
| MCYRHPHSNPLFWACGSGSDYKDDDDK   | 3143.4 | 1572.2 | 1048.5 | 786.6 | 629.5 | 1048.4 |
| MCIGKWYTYQWTRCGSGSDYKDDDDK    | 3283.6 | 1642.3 | 1095.2 | 821.6 | 657.5 | 1095.4 |
| MCYKWPIRSHLYWLCGSGSDYKDDDDK   | 3280.7 | 1640.8 | 1094.2 | 820.9 | 656.9 | 1094.3 |
| MCYRSLDFWVVCGSGSDYKDDDDK      | 2916.2 | 1458.6 | 972.7  | 729.8 | 584.0 | 1247.6 |
| MCHPTRLHLWLCCNCGSGSDYKDDDDK   | 3111.5 | 1556.2 | 1037.8 | 778.6 | 623.1 | 113.2  |
| MCHYCFNKFLFLCCGSGSDYKDDDDK    | 2906.3 | 1453.6 | 969.4  | 727.3 | 582.1 | 138.8  |
| MCVRWPNLNAFWLWCGSGSDYKDDDDK   | 3147.5 | 1574.3 | 1049.8 | 787.6 | 630.3 | 1163.1 |
| MCQQWNLYTRHW HSCGSGSDYKDDDDK  | 3274.5 | 1637.7 | 1092.2 | 819.4 | 655.7 | 1092.1 |
| MCIFDNWLPFIFCGSGSDYKDDDDK     | 2930.3 | 1465.6 | 977.4  | 733.3 | 586.9 | 977.4  |
| MCVDFSFLPFVLCGSGSDYKDDDDK     | 2802.1 | 1401.6 | 934.7  | 701.3 | 561.2 | 934.8  |
| MCTKFPWPLPIFWACGSGSDYKDDDDK   | 3121.5 | 1561.3 | 1041.2 | 781.1 | 625.1 | 1041.3 |
| MCIRWPARQPLFWLWCGSGSDYKDDDDK  | 3201.6 | 1601.3 | 1067.9 | 801.2 | 641.1 | 1067.9 |
| MCQQWNLYTRHW HICGSGSDYKDDDDK  | 3300.6 | 1650.8 | 1100.9 | 825.9 | 660.9 | 1100.7 |
| MCCFKFRDLFWVCGSGSDYKDDDDK     | 2979.4 | 1490.2 | 993.8  | 745.6 | 596.7 | 102.3  |
| MCFVCFRHSFLCCGSGSDYKDDDDK     | 2877.2 | 1439.1 | 959.7  | 720.1 | 576.2 | 113.1  |
| MCWYCFRKSFWCCGSGSDYKDDDDK     | 3044.4 | 1522.7 | 1015.5 | 761.8 | 609.7 | 113.1  |
| MCFVYPRRQPLYWICGSGSDYKDDDDK   | 3256.7 | 1628.8 | 1086.2 | 814.9 | 652.1 | 1086.5 |
| MCLFDFSFPFIFCGSGSDYKDDDDK     | 2850.2 | 1425.6 | 950.7  | 713.3 | 570.8 | 950.9  |
| MCYVCFSHSFICCGSGSDYKDDDDK     | 2824.1 | 1412.6 | 942.0  | 706.8 | 565.6 | 157.5  |
| MCVPCFSHTFLCCGSGSDYKDDDDK     | 2772.1 | 1386.5 | 924.7  | 693.8 | 555.2 | 924.1  |
| MCRLCFSKLFWCCGSGSDYKDDDDK     | 2921.3 | 1461.2 | 974.4  | 731.1 | 585.1 | 990.6  |
| MCCYRCWSLFWCCGSGSDYKDDDDK     | 2985.3 | 1493.2 | 995.8  | 747.1 | 597.9 | 1040.8 |
| MCVFDWLPFVFCGSGSDYKDDDDK      | 2875.2 | 1438.1 | 959.1  | 719.5 | 575.8 | 959.2  |
| MCSQSWVLYELWRVCGSGSDYKDDDDK   | 3184.5 | 1592.7 | 1062.2 | 796.9 | 637.7 | 1063.1 |
| MCSYCFNKFLFLCCGSGSDYKDDDDK    | 2856.2 | 1428.6 | 952.7  | 714.8 | 572.0 | 954.0  |
| MCTFDLFLPFIFCGSGSDYKDDDDK     | 2878.2 | 1439.6 | 960.1  | 720.3 | 576.4 | 960.0  |
| MCTFDTHFPFITCGSGSDYKDDDDK     | 2844.1 | 1422.5 | 948.7  | 711.8 | 569.6 | 948.9  |
| MCTKFPWPFIFWACGSGSDYKDDDDK    | 3155.6 | 1578.3 | 1052.5 | 789.6 | 631.9 | 1052.4 |

|                              |        |        |        |       |       |        |
|------------------------------|--------|--------|--------|-------|-------|--------|
| MCFRWRLFHHLTPFCGSGSDYKDDDDK  | 3275.7 | 1638.3 | 1092.6 | 819.7 | 655.9 | 1092.7 |
| MCCTRFVNLFWLCSGSGDYKDDDDK    | 2917.3 | 1459.1 | 973.1  | 730.1 | 584.3 | 129.4  |
| MCVYDIFVPFICGSGSDYKDDDDK     | 2844.2 | 1422.6 | 948.7  | 711.8 | 569.6 | 948.7  |
| MCVYDLFLPFYICGSGSDYKDDDDK    | 2908.2 | 1454.6 | 970.1  | 727.8 | 582.4 | 969.9  |
| MCIWDSFVFPILCGSGSDYKDDDDK    | 2855.2 | 1428.1 | 952.4  | 714.5 | 571.8 | 952.4  |
| MCWSLYRLFACGSGSDYKDDDDK      | 2860.2 | 1430.6 | 954.1  | 715.8 | 572.8 | 113.2  |
| MCLYDSFLPFIFCGSGSDYKDDDDK    | 2880.2 | 1440.6 | 960.7  | 720.8 | 576.8 | 960.9  |
| MCTRTSFYGFWYACGSGSDYKDDDDK   | 3180.4 | 1590.7 | 1060.8 | 795.9 | 636.9 | 239.2  |
| MCSYGSWYGYSLACGSGSDYKDDDDK   | 3035.2 | 1518.1 | 1012.4 | 759.5 | 607.8 | 1012.4 |
| MCILHGLIYWAPKQCGSGSDYKDDDDK  | 3057.4 | 1529.2 | 1019.8 | 765.1 | 612.3 | 1020.1 |
| MCIFDIHMPFIPCGSGSDYKDDDDK    | 2848.2 | 1424.6 | 950.1  | 712.8 | 570.4 | 950.7  |
| MCRLCFSKLFWCCGSGSDYKDDDDK    | 2921.3 | 1461.2 | 974.4  | 731.1 | 585.1 | 990.5  |
| MCFVYPRRQPLYWICGSGSDYKDDDDK  | 3256.7 | 1628.8 | 1086.2 | 814.9 | 652.1 | 1086.0 |
| MCFRWRLFHHLTPYCGSGSDYKDDDDK  | 3291.7 | 1646.3 | 1097.9 | 823.7 | 659.1 | 1097.9 |
| MCIFDTFLPFIFCGSGSDYKDDDDK    | 2878.2 | 1439.6 | 960.1  | 720.3 | 576.4 | 960.4  |
| MCIYRLSDFWVVCGSGSDYKDDDDK    | 2916.2 | 1458.6 | 972.7  | 729.8 | 584.0 | 1011.0 |
| MCTFDLFLPFIFCGSGSDYKDDDDK    | 2878.2 | 1439.6 | 960.1  | 720.3 | 576.4 | 959.9  |
| MCYVCFSHSFICCGSGSDYKDDDDK    | 2824.1 | 1412.6 | 942.0  | 706.8 | 565.6 | 131.4  |
| MCSNMWKLNRWWACGSGSDYKDDDDK   | 3181.5 | 1591.3 | 1061.2 | 796.1 | 637.1 | 1061.3 |
| MCIFDNWLPFIYCGSGSDYKDDDDK    | 2946.3 | 1473.6 | 982.8  | 737.3 | 590.1 | 982.7  |
| MCTRTSFYGFWYACGSGSDYKDDDDK   | 3180.4 | 1590.7 | 1060.8 | 795.9 | 636.9 | 239.2  |
| MCYRHPHSNPLFWACGSGSDYKDDDDK  | 3143.4 | 1572.2 | 1048.5 | 786.6 | 629.5 | 1048.2 |
| MCFRWRLFHHLTPYCGSGSDYKDDDDK  | 3291.7 | 1646.3 | 1097.9 | 823.7 | 659.1 | 1097.9 |
| MCTKFPWPFPFIWACGSGSDYKDDDDK  | 3155.6 | 1578.3 | 1052.5 | 789.6 | 631.9 | 1052.7 |
| MCFVCFRHSFLCCGSGSDYKDDDDK    | 2877.2 | 1439.1 | 959.7  | 720.1 | 576.2 | 113.2  |
| MCFVCFRHSFLCCGSGSDYKDDDDK    | 2877.2 | 1439.1 | 959.7  | 720.1 | 576.2 | 113.1  |
| MCLLWTRHFDRYWVCGSGSDYKDDDDK  | 3310.7 | 1655.8 | 1104.2 | 828.4 | 662.9 | 1104.4 |
| MCIGKWYTYQWTRCGSGSDYKDDDDK   | 3283.6 | 1642.3 | 1095.2 | 821.6 | 657.5 | 1094.9 |
| MCVPCFSHTFLCCGSGSDYKDDDDK    | 2772.1 | 1386.5 | 924.7  | 693.8 | 555.2 | 924.2  |
| MCIRWPARQPLFWLCCGSGSDYKDDDDK | 3201.6 | 1601.3 | 1067.9 | 801.2 | 641.1 | 1068.0 |
| MCHPTRLHLWLCCGSGSDYKDDDDK    | 3111.5 | 1556.2 | 1037.8 | 778.6 | 623.1 | 113.1  |
| MCYKCFGLFLCCGSGSDYKDDDDK     | 2813.2 | 1407.1 | 938.4  | 704.0 | 563.4 | 1011.0 |
| MCHFRPNKFTAWLPCGSGSDYKDDDDK  | 3132.5 | 1566.7 | 1044.8 | 783.9 | 627.3 | 1045.0 |
| MCWSLYRLFSGSGSDYKDDDDK       | 2501.8 | 1251.4 | 834.6  | 626.2 | 501.2 | 1132.5 |
| MCSYGSWYGYSLACGSGSDYKDDDDK   | 3035.2 | 1518.1 | 1012.4 | 759.5 | 607.8 | 1012.2 |
| MCCYNLFLFWCCGSGSDYKDDDDK     | 2914.2 | 1457.6 | 972.1  | 729.3 | 583.6 | 1164.4 |
| MCIFELNLPFIPCGSGSDYKDDDDK    | 2821.2 | 1411.1 | 941.1  | 706.0 | 565.0 | 941.3  |
| MCRFYELFWSFPCGSGSDYKDDDDK    | 3010.3 | 1505.7 | 1004.1 | 753.3 | 602.9 | 1074.4 |
| ACSAKTTSACGSGSDYKDDDDK       | 2223.3 | 1112.1 | 741.8  | 556.6 | 445.5 | 741.8  |
| ACSLNHTVNCGSGSDYKDDDDK       | 2342.4 | 1171.7 | 781.5  | 586.4 | 469.3 | 781.6  |
| LPGRTCREYDLWWVRCYSGSDYKDDDDK | 3594.9 | 1797.9 | 1199.0 | 899.5 | 719.8 | 1199.2 |
| LEERPVGSGSDYKDDDDK           | 2025.1 | 1013.0 | 675.7  | 507.0 | 405.8 | 675.8  |
| VYMSPFGSGSDYKDDDDK           | 2026.1 | 1013.6 | 676.0  | 507.3 | 406.0 | 676.2  |
| LSPPRYPGSGSDYKDDDDK          | 2112.2 | 1056.6 | 704.7  | 528.8 | 423.2 | 704.9  |
| MQLPLATGSGSDYKDDDDK          | 2056.2 | 1028.6 | 686.1  | 514.8 | 412.0 | 686.2  |
| MCYKWPIRSHLYWLCGSGSDYKDDDDK  | 3280.7 | 1640.8 | 1094.2 | 820.9 | 656.9 | 1094.0 |

## Calculated mass

| Sequence (T18 HT Screen peptides)    | [M+H]/1 | [M+2H]/2 | [M+3H]/3 | [M+4H]/4 | [M+5H]/5 | Found mass |
|--------------------------------------|---------|----------|----------|----------|----------|------------|
| ZMCREIRYWQLYRAFCSGSDYKDDDDK          | 3361.7  | 1681.3   | 1121.2   | 841.2    | 673.1    | 1121.0     |
| ZMCEHLFYLLVVKRQCGSGSDYKDDDDK         | 3269.6  | 1635.3   | 1090.5   | 818.2    | 654.7    | 1090.5     |
| ZMCKYKNIHGYVAYICGSGSDYKDDDDK         | 2979.3  | 1490.1   | 993.8    | 745.6    | 596.7    | 993.8      |
| ZMCTTLYYKLVWRRCSGSEEGSGSDYKDDDDK     | 3770.0  | 1885.5   | 1257.3   | 943.3    | 754.8    | 943.4      |
| ZMCYNYFLNKLVLVYCGSGSDYKDDDDK         | 3096.4  | 1548.7   | 1032.8   | 774.8    | 620.1    | 1032.9     |
| ZMCKEYELWYKLYQYCGSGSDYKDDDDK         | 3336.6  | 1668.8   | 1112.9   | 834.9    | 668.1    | 1112.8     |
| ZMCKHLYYLLWKKCGSGSEEGSGSDYKDDDDK     | 3762.1  | 1881.5   | 1254.7   | 941.3    | 753.2    | 941.1      |
| ZMCKYHILWYKIQKLCGSGSEEGSGSDYKDDDDK   | 3840.2  | 1920.6   | 1280.7   | 960.8    | 768.8    | 961.2      |
| ZMCKRHIRYWQLYVCGSGSEEGSGSDYKDDDDK    | 3769.1  | 1885.0   | 1257.0   | 943.0    | 754.6    | 943.2      |
| ZMCNLSIIHGYVAYICGSGSDYKDDDDK         | 3023.3  | 1512.2   | 1008.4   | 756.6    | 605.5    | 1008.4     |
| ZMCNVLKYVLRHCGSGSDYKDDDDK            | 2915.3  | 1458.1   | 972.4    | 729.6    | 583.9    | 972.6      |
| ZMCYTVLWYKQKCGSGSEEGSGSDYKDDDDK      | 3727.0  | 1864.0   | 1243.0   | 932.5    | 746.2    | 1243.0     |
| ZMCHIWFYNNQFHYVCGSGSDYKDDDDK         | 3328.6  | 1664.8   | 1110.2   | 832.9    | 666.5    | 1110.1     |
| ZMCKRHLIYKIIARCSCGSDYKDDDDK          | 3121.5  | 1561.3   | 1041.2   | 781.1    | 625.1    | 1040.9     |
| ZMCPHIFKIVYRHCSCGSEEGSGSDYKDDDDK     | 3664.0  | 1832.5   | 1222.0   | 916.7    | 733.6    | 1221.9     |
| ZMCTGRHLYWKLFCGSGSEEGSGSDYKDDDDK     | 3828.1  | 1914.5   | 1276.7   | 957.8    | 766.4    | 958.0      |
| ZMCHRHLIYWRFLHSCGSGSEEGSGSDYKDDDDK   | 3922.2  | 1961.6   | 1308.1   | 981.3    | 785.2    | 981.4      |
| ZMCAKEHLFYLLWCGSGSDYKDDDDK           | 3143.5  | 1572.2   | 1048.5   | 786.6    | 629.5    | 1048.4     |
| ZMCDISRAQYARWVICGSGSDYKDDDDK         | 3225.5  | 1613.3   | 1075.8   | 807.1    | 645.9    | 1076.0     |
| ZMCEWFYHKSQWVYVCGSGSDYKDDDDK         | 3431.7  | 1716.3   | 1144.6   | 858.7    | 687.1    | 1144.5     |
| ZMCPYHRHIFQNHWCYKCGSGSEEGSGSDYKDDDDK | 3936.1  | 1968.6   | 1312.7   | 984.8    | 788.0    | 984.8      |
| ZMCRWVFKQHEFWKVCGSGSDYKDDDDK         | 3428.8  | 1714.9   | 1143.6   | 857.9    | 686.6    | 1143.5     |
| ZMCRWVWYKQLVHRKCGSGSDYKDDDDK         | 3336.7  | 1668.9   | 1112.9   | 834.9    | 668.1    | 1112.8     |
| ZMCSILWYKITKPLCGSGSDYKDDDDK          | 3022.4  | 1511.7   | 1008.1   | 756.4    | 605.3    | 1008.2     |
| ZMCKYKNIHGYVAYICGSGSDYKDDDDK         | 2942.2  | 1471.6   | 981.4    | 736.3    | 589.2    | 981.4      |
| ZMCKYATLQWYKWFYVCGSGSDYKDDDDK        | 3357.7  | 1679.3   | 1119.9   | 840.2    | 672.3    | 1119.8     |
| ZMCDWYVYKVLKCGSGSDYKDDDDK            | 3216.6  | 1608.8   | 1072.9   | 804.9    | 644.1    | 1072.9     |
| ZMCPYAIWYKWRKTCGSGSEEGSGSDYKDDDDK    | 3882.2  | 1941.6   | 1294.7   | 971.3    | 777.2    | 971.4      |
| ZMCAKYFLIWRAYQCGSGSDYKDDDDK          | 3247.6  | 1624.3   | 1083.2   | 812.6    | 650.3    | 1083.1     |
| ZMCHIRYWQLVRKHCGSGSEEGSGSDYKDDDDK    | 3743.0  | 1872.0   | 1248.3   | 936.5    | 749.4    | 1248.4     |
| ZMCHRYIYLDYWHCGSGSDYKDDDDK           | 3126.4  | 1563.7   | 1042.8   | 782.3    | 626.1    | 1042.7     |
| ZMCFLDHKTQVFCGSGSDYKDDDDK            | 3057.4  | 1529.2   | 1019.8   | 765.1    | 612.3    | 1019.8     |
| ZMCLWYLLQFHRREGSGSDYKDDDDK           | 3271.6  | 1636.3   | 1091.2   | 818.6    | 655.1    | 1091.2     |
| ZMCESDAYRWKLVWVCGSGSDYKDDDDK         | 3299.6  | 1650.3   | 1100.5   | 825.6    | 660.7    | 1100.6     |
| ZMCTYDFVLGHYLLICGSGSDYKDDDDK         | 3138.4  | 1569.7   | 1046.8   | 785.4    | 628.5    | 1046.8     |
| ZMCPYRFRYVWQKLCGSGSDYKDDDDK          | 3394.7  | 1697.8   | 1132.2   | 849.4    | 679.7    | 1132.3     |
| ZMCEQRSRWSNYWYPCGSGSDYKDDDDK         | 3332.5  | 1666.8   | 1111.5   | 833.9    | 667.3    | 1111.4     |
| ZMCTYFELFELYLHCGSGSDYKDDDDK          | 3264.5  | 1632.8   | 1088.8   | 816.9    | 653.7    | 1088.8     |
| ZMCDKFKWYVFRHCGSGSEEGSGSDYKDDDDK     | 3845.2  | 1923.1   | 1282.4   | 962.0    | 769.8    | 962.0      |
| ZMCPYDFVDFYVYHCGSGSDYKDDDDK          | 3208.4  | 1604.7   | 1070.1   | 802.9    | 642.5    | 1070.1     |
| ZMCKIYVVDHFKFWVCGSGSDYKDDDDK         | 3367.7  | 1684.4   | 1123.2   | 842.7    | 674.3    | 1123.0     |
| ZMCKREIKYWLFCGSGSDYKDDDDK            | 3042.4  | 1521.7   | 1014.8   | 761.4    | 609.3    | 1014.8     |
| ZMCPYHRPPNSKIWRKCGSGSDYKDDDDK        | 3242.6  | 1621.8   | 1081.5   | 811.4    | 649.3    | 1081.4     |
| ZMCDLYTVLWYKIQKCGSGSDYKDDDDK         | 3359.7  | 1680.3   | 1120.6   | 840.7    | 672.7    | 1120.6     |
| ZMCEDLFYLLFHHCGSGSDYKDDDDK           | 3157.4  | 1579.2   | 1053.1   | 790.1    | 632.3    | 1053.1     |
| ZMCEVLYWLLVTCGSGSDYKDDDDK            | 3081.4  | 1541.2   | 1027.8   | 771.1    | 617.1    | 1027.7     |
| ZMCPVWQYSHHYNWHCGSGSDYKDDDDK         | 3217.4  | 1609.2   | 1073.1   | 805.1    | 644.3    | 1073.0     |
| ZMCEDLFYIIRYGCSCGSDYKDDDDK           | 3226.5  | 1613.7   | 1076.2   | 807.4    | 646.1    | 1076.1     |
| ZMCLWHYKIFRRQKCGSGSDYKDDDDK          | 3398.8  | 1699.9   | 1133.6   | 850.4    | 680.6    | 1133.3     |
| ZMCDAYVRYWQVLHCGSGSDYKDDDDK          | 3273.5  | 1637.3   | 1091.8   | 819.1    | 655.5    | 1091.8     |
| ZMCPVWQYSHHYNWHCGSGSDYKDDDDK         | 3202.6  | 1601.8   | 1068.2   | 801.4    | 641.3    | 1068.0     |
| ZMCPVWYKRLDRNWCYVCGSGSDYKDDDDK       | 3259.5  | 1630.3   | 1087.2   | 815.6    | 652.7    | 1087.1     |
| ZMCPYDFVDFYVYHCGSGSDYKDDDDK          | 3322.5  | 1661.8   | 1108.2   | 831.4    | 665.3    | 1108.3     |
| ZMCPYDYDWDHWRDCGSGSDYKDDDDK          | 3391.5  | 1696.2   | 1131.2   | 848.6    | 679.1    | 1131.1     |
| ZMCPYVYQYWRVFCGSGSDYKDDDDK           | 3081.4  | 1541.2   | 1027.8   | 771.1    | 617.1    | 1027.8     |
| ZMCPVWWSHPSIWCYVCGSGSDYKDDDDK        | 2971.3  | 1486.1   | 991.1    | 743.6    | 595.1    | 991.1      |
| ZMCEHRHPYGHWEQCGSGSDYKDDDDK          | 3136.3  | 1568.6   | 1046.1   | 784.8    | 628.1    | 1046.1     |
| ZMCAVYKLVWLVKHSRCSGSEEGSGSDYKDDDDK   | 3771.1  | 1886.0   | 1257.7   | 943.5    | 755.0    | 943.4      |
| ZMCKYKSKDLWYRVLWCGSGSDYKDDDDK        | 3494.9  | 1747.9   | 1165.6   | 874.5    | 699.8    | 1165.6     |
| ZMCPYNIWYKYVRRREGSGSDYKDDDDK         | 3413.7  | 1707.3   | 1138.6   | 854.2    | 683.5    | 1138.5     |
| ZMCTVYYYKLFHRCGSGSDYKDDDDK           | 3213.5  | 1607.3   | 1071.8   | 804.1    | 643.5    | 1071.8     |
| ZMCPYIHWYKLRVCGSGSDYKDDDDK           | 3171.5  | 1586.3   | 1057.8   | 793.6    | 635.1    | 1057.7     |
| ZMCKIDLHLFYLLCGSGSDYKDDDDK           | 3098.5  | 1549.7   | 1033.5   | 775.4    | 620.5    | 1033.4     |
| ZMCPYRFLFYLLSHCGSGSDYKDDDDK          | 3148.5  | 1574.7   | 1050.2   | 787.9    | 630.5    | 1050.2     |
| ZMCHLLYKLFHSCGSGSDYKDDDDK            | 2981.3  | 1491.1   | 994.4    | 746.1    | 597.1    | 994.4      |
| ZMCPVWYKRLDRHCGSGSDYKDDDDK           | 2931.2  | 1466.1   | 977.7    | 733.6    | 587.0    | 977.7      |
| ZMCPYRFRWTEEWQPCGSGSDYKDDDDK         | 3203.4  | 1602.2   | 1068.5   | 801.6    | 641.5    | 1068.4     |
| ZMCRHLFYWKLWHQRCGSGSEEGSGSDYKDDDDK   | 3977.3  | 1989.1   | 1326.4   | 995.1    | 796.3    | 994.9      |
| ZMCLRHLYEPYWHCGSGSDYKDDDDK           | 3074.3  | 1537.7   | 1025.4   | 769.3    | 615.7    | 1025.3     |

|                                    |        |        |        |       |       |        |
|------------------------------------|--------|--------|--------|-------|-------|--------|
| ZMCAKAFLLWKGKFCGSGSEEGSGSDYKDDDDK  | 3515.8 | 1758.4 | 1172.6 | 879.7 | 704.0 | 1171.9 |
| ZMCYEDEIWLKVLVLYCGSGSDYKDDDDK      | 3294.6 | 1647.8 | 1098.9 | 824.4 | 659.7 | 1098.8 |
| ZMCEVIWYKIQWRKCGSGSDYKDDDDK        | 3209.6 | 1605.3 | 1070.5 | 803.1 | 642.7 | 1070.4 |
| ZMCITRKNKWEWRPCGSGSDYKDDDDK        | 3303.6 | 1652.3 | 1101.9 | 826.6 | 661.5 | 1101.8 |
| ZMCVKYKYWVVFHCGSGSDYKDDDDK         | 3130.5 | 1565.7 | 1044.2 | 783.4 | 626.9 | 1044.1 |
| ZMCTHRHPYETLWHQCGSGSDYKDDDDK       | 3265.5 | 1633.2 | 1089.2 | 817.1 | 653.9 | 1089.2 |
| ZMCWYDQHSFYWERLWCGSGSDYKDDDDK      | 3390.6 | 1695.8 | 1130.9 | 848.4 | 678.9 | 1130.8 |
| ZMCYTRHPYEALWHQCGSGSDYKDDDDK       | 3261.5 | 1631.2 | 1087.8 | 816.1 | 653.1 | 1087.9 |
| ZMCREIRYWLWQCGSGSDYKDDDDK          | 3138.4 | 1569.7 | 1046.8 | 785.4 | 628.5 | 1046.8 |
| ZMCEVKYFLIWRKWCWCGSGSDYKDDDDK      | 3228.6 | 1614.8 | 1076.9 | 807.9 | 646.5 | 1076.8 |
| ZMCFDIHMPFIPCGSGSDYKDDDDK          | 2890.3 | 1445.6 | 964.1  | 723.3 | 578.9 | 964.2  |
| ZMCFWHRSDFWLQFCGSGSDYKDDDDK        | 3357.7 | 1679.3 | 1119.9 | 840.2 | 672.3 | 1119.8 |
| ZMCNKHLYYLLFKHCGSGSDYKDDDDK        | 3299.6 | 1650.3 | 1100.5 | 825.7 | 660.7 | 1100.8 |
| ZMCFHIKANYGFVRVCGSGSDYKDDDDK       | 3111.4 | 1556.2 | 1037.8 | 778.6 | 623.1 | 1037.9 |
| ZMCTDLYYLIWQRYCGSGSDYKDDDDK        | 3357.6 | 1679.3 | 1119.9 | 840.2 | 672.3 | 1119.9 |
| ZMCYNVHWYRWIRRRCGSGSDYKDDDDK       | 3465.8 | 1733.4 | 1155.9 | 867.2 | 694.0 | 1156.0 |
| ZMCPRYVLYKLFHHCGSGSDYKDDDDK        | 3296.7 | 1648.8 | 1099.6 | 824.9 | 660.1 | 1099.6 |
| ZMCNDLFYLLWRKACGSGSDYKDDDDK        | 3262.6 | 1631.8 | 1088.2 | 816.4 | 653.3 | 1088.0 |
| ZMCDIVIKILRSLCGSGSDYKDDDDK         | 2993.4 | 1497.2 | 998.5  | 749.1 | 599.5 | 998.8  |
| ZMCYEVLYKLRKHCGSGSDYKDDDDK         | 3323.7 | 1662.3 | 1108.6 | 831.7 | 665.5 | 1108.6 |
| ZMCDNRRWVRYQJFCGSGSDYKDDDDK        | 3376.7 | 1688.8 | 1126.2 | 844.9 | 676.1 | 1126.2 |
| ZMCWVFRNHKFWQJCGSGSDYKDDDDK        | 3436.8 | 1718.9 | 1146.3 | 859.9 | 688.2 | 1146.3 |
| ZMCYNKFITLYKVLVYCGSGSDYKDDDDK      | 3225.6 | 1613.3 | 1075.9 | 807.1 | 645.9 | 1075.8 |
| ZMCKRHITYWKLWHFCGSGSEEGSGSDYKDDDDK | 3922.2 | 1961.6 | 1308.1 | 981.3 | 785.2 | 981.5  |
| ZMCKHLFYKLIKACGSGSDYKDDDDK         | 3240.7 | 1620.8 | 1080.9 | 810.9 | 648.9 | 1080.9 |
| ZMCHDIVFYKVLRHCGSGSDYKDDDDK        | 3250.6 | 1625.8 | 1084.2 | 813.4 | 650.9 | 1084.1 |
| ZMCRRELYYLLYSKCGSGSDYKDDDDK        | 3327.7 | 1664.3 | 1109.9 | 832.7 | 666.3 | 1109.9 |
| ZMCHNKLYYLLYSCGSGSDYKDDDDK         | 3300.6 | 1650.8 | 1100.9 | 825.9 | 660.9 | 1100.9 |
| ZMCDLFFYKLFKLCGSGSDYKDDDDK         | 3265.7 | 1633.3 | 1089.2 | 817.2 | 653.9 | 1089.2 |
| ZMCENKVLFYLLWCGSGSDYKDDDDK         | 3276.6 | 1638.8 | 1092.9 | 819.9 | 656.1 | 1092.9 |
| ZMCYKRDLYYLVFKCGSGSDYKDDDDK        | 3331.7 | 1666.3 | 1111.2 | 833.7 | 667.1 | 1111.1 |
| ZMCYTELWYKYIRRHCGSGSDYKDDDDK       | 3388.7 | 1694.8 | 1130.2 | 847.9 | 678.5 | 1130.0 |
| ZMCYDVLWYRYRYKQCGSGSDYKDDDDK       | 3413.7 | 1707.4 | 1138.6 | 854.2 | 683.5 | 1138.5 |
| ZMCDLFYLLQHKKKVCGSGSDYKDDDDK       | 3251.6 | 1626.3 | 1084.5 | 813.6 | 651.1 | 1084.5 |
| ZMCDKRHLYYLLVCGSGSDYKDDDDK         | 3143.5 | 1572.2 | 1048.5 | 786.6 | 629.5 | 1048.5 |
| ZMCHDKFITLYKVLVYCGSGSDYKDDDDK      | 3200.6 | 1600.8 | 1067.5 | 800.9 | 640.9 | 1067.4 |
| ZMCDRLILYRIVHKCGSGSDYKDDDDK        | 3249.6 | 1625.3 | 1083.9 | 813.2 | 650.7 | 1083.8 |
| ZMCPYEIKYWIVWQCGSGSDYKDDDDK        | 3313.6 | 1657.3 | 1105.2 | 829.2 | 663.5 | 1105.3 |
| ZMCYQYRVWRSICGSGSDYKDDDDK          | 3193.5 | 1597.2 | 1065.2 | 799.1 | 639.5 | 1065.1 |
| ZMCDLRELFYLLVCGSGSDYKDDDDK         | 3232.6 | 1616.8 | 1078.2 | 808.9 | 647.3 | 1078.1 |
| ZMCPYTKYWIVWRHSCGSGSDYKDDDDK       | 3296.6 | 1648.8 | 1099.5 | 824.9 | 660.1 | 1099.4 |
| ZMCDKYWVYKWIWRCGSGSDYKDDDDK        | 3374.7 | 1687.9 | 1125.6 | 844.4 | 675.7 | 1125.5 |
| ZMCFWKKLHVFWVKDCGSGSDYKDDDDK       | 3293.7 | 1647.3 | 1098.6 | 824.2 | 659.5 | 1098.5 |
| ZMCEHLYYLLSHRRCGSGSDYKDDDDK        | 3310.6 | 1655.8 | 1104.2 | 828.4 | 662.9 | 1104.0 |
| ZMCDHRHLYYILWCGSGSDYKDDDDK         | 3367.7 | 1684.3 | 1123.2 | 842.7 | 674.3 | 1123.2 |
| ZMCEHRHPYSNFWILCGSGSDYKDDDDK       | 3259.5 | 1630.3 | 1087.2 | 815.6 | 652.7 | 1087.1 |
| ZMCRELFYRFWQKTCGSGSDYKDDDDK        | 3397.7 | 1699.4 | 1133.2 | 850.2 | 680.3 | 1133.1 |
| ZMCTYTYVFNQTYVHCGSGSDYKDDDDK       | 3196.4 | 1598.7 | 1066.1 | 799.8 | 640.1 | 1066.1 |
| ZMCEREFLYYLYKCGSGSDYKDDDDK         | 3410.7 | 1705.8 | 1137.6 | 853.4 | 682.9 | 1137.3 |
| ZMCWYVQHSFYWERLWCGSGSDYKDDDDK      | 3374.6 | 1687.8 | 1125.5 | 844.4 | 675.7 | 1125.3 |
| ZMCKIWLKAAARRFCGSGSDYKDDDDK        | 3225.7 | 1613.3 | 1075.9 | 807.2 | 645.9 | 1075.8 |
| ZMCEHRHPFTQYWLRCGSGSDYKDDDDK       | 3330.6 | 1665.8 | 1110.9 | 833.4 | 666.9 | 1110.8 |
| ZMCVYEVFDRLTVTCGSGSDYKDDDDK        | 3165.4 | 1583.2 | 1055.8 | 792.1 | 633.9 | 1055.8 |
| ZMCYEVLYWYQQQRHCGSGSDYKDDDDK       | 3373.6 | 1687.3 | 1125.2 | 844.1 | 675.5 | 1125.1 |
| ZMCRDFIYWYKLFQCGSGSDYKDDDDK        | 3304.6 | 1652.8 | 1102.2 | 826.9 | 661.7 | 1102.1 |
| ZMCYTRHPFQKRWHYCGSGSEEGSGSDYKDDDDK | 3926.1 | 1963.6 | 1309.4 | 982.3 | 786.0 | 982.2  |
| ZMCKFDLDFYKIWCGSGSDYKDDDDK         | 3261.7 | 1631.3 | 1087.9 | 816.2 | 653.1 | 1087.8 |
| ZMCYEVLYWYQYWRKVCGSGSDYKDDDDK      | 3393.7 | 1697.4 | 1131.9 | 849.2 | 679.5 | 1131.8 |
| ZMCYTKAYWHEPWRPCGSGSDYKDDDDK       | 3294.5 | 1647.8 | 1098.8 | 824.4 | 659.7 | 1098.8 |
| ZMCEVIWYKIQYRLCGSGSDYKDDDDK        | 3171.5 | 1586.3 | 1057.8 | 793.6 | 635.1 | 1057.7 |
| ZMCDLFYLLFIKRRKCGSGSEEGSGSDYKDDDDK | 3869.2 | 1935.1 | 1290.4 | 968.1 | 774.6 | 968.0  |
| ZMCEHRHPYEAFFWHECGSGSDYKDDDDK      | 3298.5 | 1649.7 | 1100.2 | 825.4 | 660.5 | 1100.0 |
| ZMCHFKRDYYWYLWQCGSGSDYKDDDDK       | 3465.7 | 1733.4 | 1155.9 | 867.2 | 693.9 | 1155.9 |
| ZMCVHRHRFEPEWHVCGSGSDYKDDDDK       | 3289.5 | 1645.3 | 1097.2 | 823.1 | 658.7 | 1097.1 |
| ZMCWVWQHPFLFWSKICGSGSDYKDDDDK      | 3301.7 | 1651.3 | 1101.2 | 826.2 | 661.1 | 1101.1 |
| ZMCYTRKPFFFWRLCGSGSDYKDDDDK        | 3350.7 | 1675.9 | 1117.6 | 838.4 | 670.9 | 1117.4 |
| ZMCWEFTKFGWWTICGSGSDYKDDDDK        | 3290.5 | 1645.8 | 1097.5 | 823.4 | 658.9 | 1097.5 |
| ZMCAYRHIPEYVWHSCGSGSDYKDDDDK       | 3282.5 | 1641.7 | 1094.8 | 821.4 | 657.3 | 1094.7 |
| ZMCYTKATVFSQWVLCGSGSDYKDDDDK       | 3103.4 | 1552.2 | 1035.1 | 776.6 | 621.5 | 1035.1 |
| ZMCHLWYLLVHHRDCGSGSDYKDDDDK        | 3355.6 | 1678.3 | 1119.2 | 839.7 | 671.9 | 1119.1 |
| ZMCKYSVYWKYQWRKCGSGSDYKDDDDK       | 3395.7 | 1698.4 | 1132.6 | 849.7 | 679.9 | 1132.5 |

|                                    |        |        |        |       |       |        |
|------------------------------------|--------|--------|--------|-------|-------|--------|
| ZMCEHKHPFERVWRSCGSGSDYKDDDDK       | 3268.5 | 1634.8 | 1090.2 | 817.9 | 654.5 | 1090.0 |
| ZMCKYHRDLLYFLHCGSGSDYKDDDDK        | 3328.7 | 1664.8 | 1110.2 | 832.9 | 666.5 | 1110.1 |
| ZMCEYRHKFEERWVHVCGSGSDYKDDDDK      | 3376.6 | 1688.8 | 1126.2 | 844.9 | 676.1 | 1126.1 |
| ZMCYTRRFKWQDWHACGSGSDYKDDDDK       | 3354.6 | 1677.8 | 1118.9 | 839.4 | 671.7 | 1118.8 |
| ZMCYTRHKFDHRWRACGSGSEEGSGSDYKDDDDK | 3880.1 | 1940.5 | 1294.0 | 970.8 | 776.8 | 970.8  |
| ZMCEFEIRWYQYQRKCGSGSDYKDDDDK       | 3406.7 | 1703.8 | 1136.2 | 852.4 | 682.1 | 1136.2 |
| ZMCYTKYFYFEPWRICGSGSDYKDDDDK       | 3373.7 | 1687.3 | 1125.2 | 844.2 | 675.5 | 1125.2 |
| ZMCYTRDRYELHWRLCGSGSDYKDDDDK       | 3368.6 | 1684.8 | 1123.5 | 842.9 | 674.5 | 1123.5 |
| ZMCTTRKNKWEEWRPCGSGSDYKDDDDK       | 3291.5 | 1646.3 | 1097.8 | 823.6 | 659.1 | 1097.8 |
| ZMCWEEIWIYKQHKCGSGSDYKDDDDK        | 3333.7 | 1667.3 | 1111.9 | 834.2 | 667.5 | 1111.7 |
| ZMCYTKSFYWPWRSCGSGSDYKDDDDK        | 3294.6 | 1647.8 | 1098.9 | 824.4 | 659.7 | 1098.8 |
| ZMCYTRHKFDQYWQPCGSGSDYKDDDDK       | 3329.6 | 1665.3 | 1110.5 | 833.1 | 666.7 | 1110.5 |
| ZMCEYTLFGYHYIKCGSGSDYKDDDDK        | 3257.5 | 1629.3 | 1086.5 | 815.1 | 652.3 | 1086.4 |
| ZMCYTRLNKHAKWQKCGSGSDYKDDDDK       | 3233.5 | 1617.3 | 1078.5 | 809.1 | 647.5 | 1078.4 |
| ZMCNKHLYYLLFKQCGSGSDYKDDDDK        | 3290.6 | 1645.8 | 1097.5 | 823.4 | 658.9 | 1097.5 |
| ZMCFNVHWYRWIRRRCGSGSDYKDDDDK       | 3449.8 | 1725.4 | 1150.6 | 863.2 | 690.8 | 1150.5 |
| ZMCAYEYVFDRLTVTCGSGSDYKDDDDK       | 3137.4 | 1569.2 | 1046.5 | 785.1 | 628.3 | 1046.3 |
| ZMCFRHKRSDFWLQFCGSGSDYKDDDDK       | 3327.7 | 1664.3 | 1109.9 | 832.7 | 666.3 | 1109.6 |
| ZMCFKQHLFYLLHCGSGSDYKDDDDK         | 3169.5 | 1585.3 | 1057.2 | 793.1 | 634.7 | 1057.1 |
| ZMCRHLAYWKLWHRKCGSGSDYKDDDDK       | 3354.7 | 1677.9 | 1118.9 | 839.4 | 671.7 | 1118.9 |
| ZMCVIVYKILRSLCGSGSDYKDDDDK         | 2977.4 | 1489.2 | 993.1  | 745.1 | 596.3 | 373.2  |
| ZMCLHIKANYGFVRVCGSGSDYKDDDDK       | 3077.4 | 1539.2 | 1026.5 | 770.1 | 616.3 | 1026.4 |
| ZMCHWDIYWYRWVRRRCGSGSDYKDDDDK      | 3496.8 | 1748.9 | 1166.3 | 875.0 | 700.2 | 1166.1 |
| ZMCVHKKWIRYWQIFCGSGSEEGSGSDYKDDDDK | 3911.3 | 1956.1 | 1304.4 | 978.6 | 783.1 | 978.8  |
| ZMCEHRHPYSNFWIPCGSGSDYKDDDDK       | 3243.5 | 1622.2 | 1081.8 | 811.6 | 649.5 | 1081.9 |
| ZMCITRHRFEQFWHLGSGSDYKDDDDK        | 3330.6 | 1665.8 | 1110.9 | 833.4 | 666.9 | 1110.9 |
| ZMCHVILWRSWRVYCGSGSDYKDDDDK        | 3076.4 | 1538.7 | 1026.1 | 769.8 | 616.1 | 1026.0 |
| ZMCIFDIHMPPFPCGSGSDYKDDDDK         | 2890.3 | 1445.6 | 964.1  | 723.3 | 578.9 | 964.1  |
