# Supplementary material for: Identification and engineering of potent cyclic peptides with selective or promiscuous binding through biochemical profiling and bioinformatic data analysis
Source: Royal Society of Chemistry journal article supplement (doi:10.1039/d3cb00168g), 2023-11-14
Supplement: d3cb00168g4.pdf [file d3cb00168g4.pdf]

| sequence                          | kd M (FGF-R1C) | kd M(FGF-R3C) | kd M (FGF-R4) | determination method (e.g. single) | peptide type (selection or) | selected against | Library | comment                |
|-----------------------------------|----------------|---------------|---------------|------------------------------------|-----------------------------|------------------|---------|------------------------|
| ZMCFRWRFLFHHLLTPYCGSGSDYKDDDDK    | 1.42E-07       | >1.00E-05     | 1.46E-07      | Crude                              | Selection                   | FGFR-1C          | NNK     |                        |
| ZMCIWRPARQSLFWLFCGSGSDYKDDDDK     | 3.10E-08       | 4.63E-07      | 8.80E-08      | Crude                              | Selection                   | FGFR-1C          | NNK     |                        |
| ZMCSNMWKLANRWVWACGSGSDYKDDDDK     | 3.91E-07       | >1.00E-05     | >1.00E-05     | Crude                              | Selection                   | FGFR-1C          | NNK     |                        |
| ZMCTRFRVNLFWLFCGSGSDYKDDDDK       | >1.00E-05      | >1.00E-05     | >1.00E-05     | Crude                              | Selection                   | FGFR-1C          | NNK     |                        |
| ZMCPVCFHSHTFLCCGSGSDYKDDDDK       | 5.90E-08       | 5.40E-08      | >1.00E-05     | Crude                              | Selection                   | FGFR-1C          | NNK     |                        |
| ZMWCYCFRKSFWFCGSGSDYKDDDDK        | >1.00E-05      | 1.25E-06      | >1.00E-05     | Crude                              | Selection                   | FGFR-1C          | NNK     |                        |
| ZMZYRFPSSHFLWACGSGSDYKDDDDK       | >1.00E-05      | >1.00E-05     | >1.00E-05     | Crude                              | Selection                   | FGFR-1C          | NNK     |                        |
| ZMCPVCFHSHTFLCCGSGSDYKDDDDK       | >1.00E-05      | 1.31E-07      | >1.00E-05     | Purified                           | Selection                   | FGFR-1c          | NNK     | , 1st disulfide isomer |
| ZMCPVCFHSHTFLCCGSGSDYKDDDDK       | 5.64E-08       | 4.60E-08      | >1.00E-05     | Purified                           | Selection                   | FGFR-1c          | NNK     | , 2nd disulfide isomer |
| MCCFKFRDLFWVWCGSGSDYKDDDDK        | 7.16E-08       | 4.27E-05      | >1.00E-05     | Crude                              | Selection                   | FGFR-1C          | NNK     |                        |
| MCCTRFRVNLFWLFCGSGSDYKDDDDK       | 1.43E-07       | >1.00E-05     | >1.00E-05     | Crude                              | Selection                   | FGFR-1C          | NNK     |                        |
| MCCVRYLARFWLFCGSGSDYKDDDDK        | >1.00E-05      | 2.72E-07      | 1.08E-07      | Crude                              | Selection                   | FGFR-1C          | NNK     |                        |
| MCCYNLFSLFWACGSGSDYKDDDDK         | >1.00E-05      | >1.00E-05     | >1.00E-05     | Crude                              | Selection                   | FGFR-1C          | NNK     |                        |
| MCCYNLFSLFWACGSGSDYKDDDDK         | >1.00E-05      | >1.00E-05     | >1.00E-05     | Crude                              | Selection                   | FGFR-1C          | NNK     |                        |
| MCCYRCWLSLFWCCGSGSDYKDDDDK        | >1.00E-05      | >1.00E-05     | >1.00E-05     | Crude                              | Selection                   | FGFR-1C          | NNK     |                        |
| MCFRCLFASLFWCCGSGSDYKDDDDK        | >1.00E-05      | >1.00E-05     | >1.00E-05     | Crude                              | Selection                   | FGFR-1C          | NNK     |                        |
| MCFRWRFLFHHLLTPYCGSGSDYKDDDDK     | 4.99E-08       | >1.00E-05     | 7.90E-08      | Crude                              | Selection                   | FGFR-1C          | NNK     |                        |
| MCFRWRFLFHHLLTPYCGSGSDYKDDDDK     | 1.28E-07       | 5.80E-08      | >1.00E-05     | Crude                              | Selection                   | FGFR-1C          | NNK     |                        |
| MCFRWRFLFHHLLTPYCGSGSDYKDDDDK     | 1.33E-07       | 2.90E-08      | >1.00E-05     | Crude                              | Selection                   | FGFR-1C          | NNK     |                        |
| MCFRWRFLFHHLLTPYCGSGSDYKDDDDK     | 1.36E-07       | >1.00E-05     | 4.00E-07      | Crude                              | Selection                   | FGFR-1C          | NNK     |                        |
| MCFVCFRHSFLCCGSGSDYKDDDDK         | >1.00E-05      | >1.00E-05     | 9.50E-08      | Crude                              | Selection                   | FGFR-1C          | NNK     |                        |
| MCFVCFRHSFLCCGSGSDYKDDDDK         | >1.00E-05      | >1.00E-05     | >1.00E-05     | Crude                              | Selection                   | FGFR-1C          | NNK     |                        |
| MCFVCFRHSFLCCGSGSDYKDDDDK         | >1.00E-05      | >1.00E-05     | >1.00E-05     | Crude                              | Selection                   | FGFR-1C          | NNK     |                        |
| MCFVCFRHSFLCCGSGSDYKDDDDK         | >1.00E-05      | >1.00E-05     | 4.40E-08      | Crude                              | Selection                   | FGFR-1C          | NNK     |                        |
| MCFVYPRROPLYWVICGSGSDYKDDDDK      | 1.35E-07       | >1.00E-05     | 1.27E-07      | Crude                              | Selection                   | FGFR-1C          | NNK     |                        |
| MCFVYPRROPLYWVICGSGSDYKDDDDK      | 1.47E-07       | 4.40E-08      | >1.00E-05     | Crude                              | Selection                   | FGFR-1C          | NNK     |                        |
| MCFRFRNKFTAWLPCGSGSDYKDDDDK       | >1.00E-05      | 3.87E-07      | >1.00E-05     | Crude                              | Selection                   | FGFR-1C          | NNK     |                        |
| MCHPTRLLHLWCCNCGSGSDYKDDDDK       | >1.00E-05      | >1.00E-05     | >1.00E-05     | Crude                              | Selection                   | FGFR-1C          | NNK     |                        |
| MCIFELNLPFPCGSGSDYKDDDDK          | >1.00E-05      | >1.00E-05     | >1.00E-05     | Crude                              | Selection                   | FGFR-1C          | NNK     |                        |
| MCIGKWYTTYQYVTRCGSGSDYKDDDDK      | 4.88E-07       | >1.00E-05     | >1.00E-05     | Crude                              | Selection                   | FGFR-1C          | NNK     |                        |
| MCIGKWYTTYQYVTRCGSGSDYKDDDDK      | 5.42E-06       | >1.00E-05     | >1.00E-05     | Crude                              | Selection                   | FGFR-1C          | NNK     |                        |
| MCILHGLIYWAPKCCGSGSDYKDDDDK       | >1.00E-05      | >1.00E-05     | >1.00E-05     | Crude                              | Selection                   | FGFR-1C          | NNK     |                        |
| MCIWRPARQPLFWLFCGSGSDYKDDDDK      | 1.08E-08       | 7.90E-08      | 9.48E-07      | Crude                              | Selection                   | FGFR-1C          | NNK     |                        |
| MCIWRPARQPLFWLFCGSGSDYKDDDDK      | 1.94E-08       | 1.12E-07      | 8.20E-08      | Crude                              | Selection                   | FGFR-1C          | NNK     |                        |
| MCIWRPARQSLFWICGSGSDYKDDDDK       | 4.90E-08       | 6.50E-08      | >1.00E-05     | Crude                              | Selection                   | FGFR-1C          | NNK     |                        |
| MCIWRPARQSLFWLFCGSGSDYKDDDDK      | 8.49E-08       | 1.57E-07      | >1.00E-05     | Crude                              | Selection                   | FGFR-1C          | NNK     |                        |
| MCIYRLSDFWVWCGSGSDYKDDDDK         | 6.80E-08       | 6.30E-07      | 5.31E-07      | Crude                              | Selection                   | FGFR-1C          | NNK     |                        |
| MCIYRLSDFWVWCGSGSDYKDDDDK         | >1.00E-05      | 9.90E-08      | 2.29E-07      | Crude                              | Selection                   | FGFR-1C          | NNK     |                        |
| MCLLWTRHFDRYVWCGSGSDYKDDDDK       | 9.49E-08       | >1.00E-05     | >1.00E-05     | Crude                              | Selection                   | FGFR-1C          | NNK     |                        |
| MCLLWTRHFDRYVWCGSGSDYKDDDDK       | 2.70E-07       | >1.00E-05     | >1.00E-05     | Crude                              | Selection                   | FGFR-1C          | NNK     |                        |
| MCRFYELFWSFPCGSGSDYKDDDDK         | >1.00E-05      | >1.00E-05     | >1.00E-05     | Crude                              | Selection                   | FGFR-1C          | NNK     |                        |
| MCRCLFSKLFWVWCGSGSDYKDDDDK        | 5.00E-08       | >1.00E-05     | >1.00E-05     | Crude                              | Selection                   | FGFR-1C          | NNK     |                        |
| MCRCLFSKLFWVWCGSGSDYKDDDDK        | >1.00E-05      | 1.45E-05      | >1.00E-05     | Crude                              | Selection                   | FGFR-1C          | NNK     |                        |
| MCRCLFSKLFWVWCGSGSDYKDDDDK        | >1.00E-05      | >1.00E-05     | >1.00E-05     | Crude                              | Selection                   | FGFR-1C          | NNK     |                        |
| MCSNMWKLANRWVWACGSGSDYKDDDDK      | 5.33E-08       | >1.00E-05     | 1.05E-06      | Crude                              | Selection                   | FGFR-1C          | NNK     |                        |
| MCSNMWKLANRWVWACGSGSDYKDDDDK      | 1.12E-07       | 3.00E-08      | >1.00E-05     | Crude                              | Selection                   | FGFR-1C          | NNK     |                        |
| MCSQSQWLVLYLWVWCGSGSDYKDDDDK      | >1.00E-05      | >1.00E-05     | >1.00E-05     | Crude                              | Selection                   | FGFR-1C          | NNK     |                        |
| MCSYGSWYGYSYLACGSGSDYKDDDDK       | >1.00E-05      | >1.00E-05     | >1.00E-05     | Crude                              | Selection                   | FGFR-1C          | NNK     |                        |
| MCSYGSWYGYSYLACGSGSDYKDDDDK       | >1.00E-05      | >1.00E-05     | >1.00E-05     | Crude                              | Selection                   | FGFR-1C          | NNK     |                        |
| MCTKFPWPFFIFWACGSGSDYKDDDDK       | 1.55E-07       | 4.70E-08      | 7.00E-08      | Crude                              | Selection                   | FGFR-1C          | NNK     |                        |
| MCTKFPWPFFIFWACGSGSDYKDDDDK       | 3.80E-07       | >1.00E-05     | 2.41E-07      | Crude                              | Selection                   | FGFR-1C          | NNK     |                        |
| MCTKFPWPFFIFWACGSGSDYKDDDDK       | 5.45E-07       | >1.00E-05     | 3.46E-07      | Crude                              | Selection                   | FGFR-1C          | NNK     |                        |
| MCTRTSFYGFWYVWACGSGSDYKDDDDK      | 8.36E-08       | 2.13E-07      | 1.72E-07      | Crude                              | Selection                   | FGFR-1C          | NNK     |                        |
| MCTRTSFYGFWYVWACGSGSDYKDDDDK      | 1.67E-07       | 3.35E-07      | >1.00E-05     | Crude                              | Selection                   | FGFR-1C          | NNK     |                        |
| MCPVCFHSHTFLCCGSGSDYKDDDDK        | >1.00E-05      | 4.75E-07      | >1.00E-05     | Crude                              | Selection                   | FGFR-1C          | NNK     |                        |
| MCPVCFHSHTFLCCGSGSDYKDDDDK        | >1.00E-05      | 5.46E-06      | >1.00E-05     | Crude                              | Selection                   | FGFR-1C          | NNK     |                        |
| MCVRWPNLNLFWLFCGSGSDYKDDDDK       | 3.84E-07       | 1.52E-06      | >1.00E-05     | Crude                              | Selection                   | FGFR-1C          | NNK     |                        |
| MCWSLYRFLFGSGSDYKDDDDK            | >1.00E-05      | >1.00E-05     | >1.00E-05     | Crude                              | Selection                   | FGFR-1C          | NNK     |                        |
| MCWSLYRFLFWACGSGSDYKDDDDK         | 1.77E-07       | 6.03E-06      | >1.00E-05     | Crude                              | Selection                   | FGFR-1C          | NNK     |                        |
| MCWYCFRKSFWLFCGSGSDYKDDDDK        | >1.00E-05      | >1.00E-05     | >1.00E-05     | Crude                              | Selection                   | FGFR-1C          | NNK     |                        |
| MCKYKFTGLFLCCGSGSDYKDDDDK         | >1.00E-05      | 3.89E-05      | >1.00E-05     | Crude                              | Selection                   | FGFR-1C          | NNK     |                        |
| MCKYKWPISRSHLYWLCGSGSDYKDDDDK     | 1.44E-07       | 1.46E-07      | >1.00E-05     | Crude                              | Selection                   | FGFR-1C          | NNK     |                        |
| MCKYKWPISRSHLYWLCGSGSDYKDDDDK     | 6.34E-07       | 9.96E-06      | >1.00E-05     | Crude                              | Selection                   | FGFR-1C          | NNK     |                        |
| MCRYRHPHSNPLFWACGSGSDYKDDDDK      | 8.50E-08       | >1.00E-05     | >1.00E-05     | Crude                              | Selection                   | FGFR-1C          | NNK     |                        |
| MCRYRHPHSNPLFWACGSGSDYKDDDDK      | 2.37E-07       | >1.00E-05     | >1.00E-05     | Crude                              | Selection                   | FGFR-1C          | NNK     |                        |
| MCYVCFHSFICCGSGSDYKDDDDK          | >1.00E-05      | >1.00E-05     | >1.00E-05     | Crude                              | Selection                   | FGFR-1C          | NNK     |                        |
| MCYVCFHSFICCGSGSDYKDDDDK          | >1.00E-05      | >1.00E-05     | >1.00E-05     | Crude                              | Selection                   | FGFR-1C          | NNK     |                        |
| MCIGKWYTTYQYVTRCGSGSDYKDDDDK      | 1.11E-07       | >1.00E-05     | >1.00E-05     | Purified                           | Selection                   | FGFR-1c          | NNK     |                        |
| MCLLWTRHFDRYVWCGSGSDYKDDDDK       | 6.37E-08       | >1.00E-05     | >1.00E-05     | Purified                           | Selection                   | FGFR-1c          | NNK     |                        |
| MCSNMWKLANRWVWACGSGSDYKDDDDK      | 5.79E-08       | 5.46E-06      | >1.00E-05     | Purified                           | Selection                   | FGFR-1c          | NNK     |                        |
| MCTKFPWPFFIFWACGSGSDYKDDDDK       | 3.23E-07       | >1.00E-05     | 4.64E-07      | Purified                           | Selection                   | FGFR-1c          | NNK     |                        |
| MCIWRPARQPLFWLFCGSGSDYKDDDDK      | 1.15E-09       | 4.67E-08      | 8.20E-08      | Purified                           | Selection                   | FGFR-1c          | NNK     |                        |
| MCFRWRFLFHHLLTPYCGSGSDYKDDDDK     | 1.01E-07       | >1.00E-05     | 7.29E-08      | Purified                           | Selection                   | FGFR-1c          | NNK     |                        |
| Z(Nie)CFQYFHILWPFCCGSGSDYKDDDDK   | >1.00E-05      | >1.00E-05     | >1.00E-05     | Crude                              | Mutagenesis scan            | FGFR-1c          | NNK     |                        |
| Z(Nie)CFTHFHMLWPFCCGSGSDYKDDDDK   | >1.00E-05      | >1.00E-05     | >1.00E-05     | Crude                              | Mutagenesis scan            | FGFR-1c          | NNK     |                        |
| Z(Nie)CIRWPARQPLFWLFCGSGSDYKDDDDK | 2.00E-09       | 2.86E-08      | 8.25E-08      | Crude                              | Mutagenesis scan            | FGFR-1c          | NNK     |                        |
| ZACIRWPARQPLFWLFCGSGSDYKDDDDK     | 9.85E-09       | 4.45E-08      | 1.19E-07      | Crude                              | Mutagenesis scan            | FGFR-1c          | NNK     |                        |
| ZMCAWRWPARQPLFWLFCGSGSDYKDDDDK    | 1.09E-08       | 2.14E-07      | 1.83E-08      | Crude                              | Mutagenesis scan            | FGFR-1c          | NNK     |                        |
| ZMCDRWPARQPLFWLFCGSGSDYKDDDDK     | 1.59E-08       | 8.96E-07      | 1.19E-08      | Crude                              | Mutagenesis scan            | FGFR-1c          | NNK     |                        |
| ZMCEWRWPARQPLFWLFCGSGSDYKDDDDK    | 4.60E-09       | 2.49E-07      | 3.88E-08      | Crude                              | Mutagenesis scan            | FGFR-1c          | NNK     |                        |
| ZMCFRWPARQPLFWLFCGSGSDYKDDDDK     | 4.02E-09       | 6.53E-08      | 2.95E-08      | Crude                              | Mutagenesis scan            | FGFR-1c          | NNK     |                        |
| ZMCGRWPARQPLFWLFCGSGSDYKDDDDK     | 8.75E-09       | 1.07E-07      | 6.43E-08      | Crude                              | Mutagenesis scan            | FGFR-1c          | NNK     |                        |
| ZMCHRWPARQPLFWLFCGSGSDYKDDDDK     | 2.17E-09       | 1.54E-08      | 4.83E-08      | Crude                              | Mutagenesis scan            | FGFR-1c          | NNK     |                        |
| ZMCIAWPARQPLFWLFCGSGSDYKDDDDK     | 2.23E-08       | 2.63E-07      | 2.57E-09      | Crude                              | Mutagenesis scan            | FGFR-1c          | NNK     |                        |
| ZMCIWDWPARQPLFWLFCGSGSDYKDDDDK    | >1.00E-05      | >1.00E-05     | 1.61E-07      | Crude                              | Mutagenesis scan            | FGFR-1c          | NNK     |                        |
| ZMCIWPARQPLFWLFCGSGSDYKDDDDK      | >1.00E-05      | 7.79E-08      | >1.00E-05     | Crude                              | Mutagenesis scan            | FGFR-1c          | NNK     |                        |
| ZMCIWPARQPLFWLFCGSGSDYKDDDDK      | 1.37E-07       | >1.00E-05     | 3.36E-09      | Crude                              | Mutagenesis scan            | FGFR-1c          | NNK     |                        |
| ZMCIWPARQPLFWLFCGSGSDYKDDDDK      | 4.23E-08       | 4.61E-07      | 1.59E-08      | Crude                              | Mutagenesis scan            | FGFR-1c          | NNK     |                        |
| ZMCIWPARQPLFWLFCGSGSDYKDDDDK      | >1.00E-05      | 3.44E-07      | 1.34E-09      | Crude                              | Mutagenesis scan            | FGFR-1c          | NNK     |                        |
| ZMCIWPARQPLFWLFCGSGSDYKDDDDK      | 1.60E-08       | 1.66E-07      | 3.95E-08      | Crude                              | Mutagenesis scan            | FGFR-1c          | NNK     |                        |
| ZMCIWPARQPLFWLFCGSGSDYKDDDDK      | 2.51E-08       | 1.31E-08      | 3.37E-09      | Crude                              | Mutagenesis scan            | FGFR-1c          | NNK     |                        |
| ZMCIWPARQPLFWLFCGSGSDYKDDDDK      | 1.53E-08       | 3.97E-08      | 7.99E-09      | Crude                              | Mutagenesis scan            | FGFR-1c          | NNK     |                        |
| ZMCIWPARQPLFWLFCGSGSDYKDDDDK      | >1.00E-05      | 2.42E-08      | >1.00E-05     | Crude                              | Mutagenesis scan            | FGFR-1c          | NNK     |                        |
| ZMCIWPARQPLFWLFCGSGSDYKDDDDK      | >1.00E-05      | 2.73E-08      | 2.16E-09      | Crude                              | Mutagenesis scan            | FGFR-1c          | NNK     |                        |
| ZMCIWPARQPLFWLFCGSGSDYKDDDDK      | 1.74E-07       | 3.19E-07      | >1.00E-05     | Crude                              | Mutagenesis scan            | FGFR-1c          | NNK     |                        |
| ZMCIWPARQPLFWLFCGSGSDYKDDDDK      | 7.09E-07       | 4.94E-07      | 2.77E-08      | Crude                              | Mutagenesis scan            | FGFR-1c          | NNK     |                        |
| ZMCIWPARQPLFWLFCGSGSDYKDDDDK      | 2.18E-07       | >1.00E-05     | 2.96E-08      | Crude                              | Mutagenesis scan            | FGFR-1c          | NNK     |                        |
| ZMCIWPARQPLFWLFCGSGSDYKDDDDK      | 2.53E-08       | 1.58E-08      | 1.69E-09      | Crude                              | Mutagenesis scan            | FGFR-1c          | NNK     |                        |
| ZMCIWPARQPLFWLFCGSGSDYKDDDDK      | >1.00E-05      | 2.43E-08      | >1.00E-05     | Crude                              | Mutagenesis scan            | FGFR-1c          | NNK     |                        |



|                                |           |           |           |       |                  |         |     |
|--------------------------------|-----------|-----------|-----------|-------|------------------|---------|-----|
| ZMCIRWPARQSLFWLFCGSGSDYKDDDDK  | 4.51E-08  | 8.75E-08  | 2.25E-08  | Crude | Mutagenesis scan | FGF-R1c | NNK |
| ZMCIRWPARQTLFWLFCGSGSDYKDDDDK  | 1.63E-07  | 1.44E-07  | 2.87E-08  | Crude | Mutagenesis scan | FGF-R1c | NNK |
| ZMCIRWPARQVFLFWLFCGSGSDYKDDDDK | >1.00E-05 | >1.00E-05 | >1.00E-05 | Crude | Mutagenesis scan | FGF-R1c | NNK |
| ZMCIRWPARQWFLFWLFCGSGSDYKDDDDK | 9.72E-08  | >1.00E-05 | 2.96E-08  | Crude | Mutagenesis scan | FGF-R1c | NNK |
| ZMCIRWPARRPLFWLFCGSGSDYKDDDDK  | 2.56E-09  | 3.31E-08  | 4.13E-09  | Crude | Mutagenesis scan | FGF-R1c | NNK |
| ZMCIRWPARSPLFWLFCGSGSDYKDDDDK  | 7.82E-09  | 1.70E-08  | 1.59E-07  | Crude | Mutagenesis scan | FGF-R1c | NNK |
| ZMCIRWPARTPLFWLFCGSGSDYKDDDDK  | 1.02E-08  | 1.85E-08  | 8.73E-08  | Crude | Mutagenesis scan | FGF-R1c | NNK |
| ZMCIRWPARVPLFWLFCGSGSDYKDDDDK  | 1.11E-08  | 8.70E-09  | 7.62E-08  | Crude | Mutagenesis scan | FGF-R1c | NNK |
| ZMCIRWPARWPLFWLFCGSGSDYKDDDDK  | 1.49E-08  | 3.63E-08  | 2.90E-08  | Crude | Mutagenesis scan | FGF-R1c | NNK |
| ZMCIRWPARYPLFWLFCGSGSDYKDDDDK  | 8.87E-09  | 1.50E-08  | 2.45E-08  | Crude | Mutagenesis scan | FGF-R1c | NNK |
| ZMCIRWPAQPLFWLFCGSGSDYKDDDDK   | 2.26E-08  | 4.51E-08  | >1.00E-05 | Crude | Mutagenesis scan | FGF-R1c | NNK |
| ZMCIRWPATQPLFWLFCGSGSDYKDDDDK  | 5.72E-08  | 4.60E-08  | >1.00E-05 | Crude | Mutagenesis scan | FGF-R1c | NNK |
| ZMCIRWPAVQPLFWLFCGSGSDYKDDDDK  | 2.92E-08  | 3.26E-08  | >1.00E-05 | Crude | Mutagenesis scan | FGF-R1c | NNK |
| ZMCIRWPAWQPLFWLFCGSGSDYKDDDDK  | 1.60E-08  | 5.76E-08  | 5.62E-09  | Crude | Mutagenesis scan | FGF-R1c | NNK |
| ZMCIRWPAYQPLFWLFCGSGSDYKDDDDK  | 2.91E-08  | 6.77E-08  | >1.00E-05 | Crude | Mutagenesis scan | FGF-R1c | NNK |
| ZMCIRWPDQPLFWLFCGSGSDYKDDDDK   | >1.00E-05 | 9.91E-08  | >1.00E-05 | Crude | Mutagenesis scan | FGF-R1c | NNK |
| ZMCIRWPERQPLFWLFCGSGSDYKDDDDK  | >1.00E-05 | 3.44E-08  | >1.00E-05 | Crude | Mutagenesis scan | FGF-R1c | NNK |
| ZMCIRWPPERQPLFWLFCGSGSDYKDDDDK | >1.00E-05 | 1.69E-07  | 6.58E-09  | Crude | Mutagenesis scan | FGF-R1c | NNK |
| ZMCIRWPGRQPLFWLFCGSGSDYKDDDDK  | >1.00E-05 | 1.18E-07  | 6.51E-09  | Crude | Mutagenesis scan | FGF-R1c | NNK |
| ZMCIRWPHRQPLFWLFCGSGSDYKDDDDK  | 1.40E-08  | 3.11E-08  | 2.87E-08  | Crude | Mutagenesis scan | FGF-R1c | NNK |
| ZMCIRWPIRQPLFWLFCGSGSDYKDDDDK  | 1.34E-08  | 1.36E-08  | 9.88E-09  | Crude | Mutagenesis scan | FGF-R1c | NNK |
| ZMCIRWPKRQPLFWLFCGSGSDYKDDDDK  | >1.00E-05 | 7.23E-09  | 1.46E-08  | Crude | Mutagenesis scan | FGF-R1c | NNK |
| ZMCIRWPLRQPLFWLFCGSGSDYKDDDDK  | 3.95E-08  | 3.39E-08  | 1.39E-08  | Crude | Mutagenesis scan | FGF-R1c | NNK |
| ZMCIRWPNRQPLFWLFCGSGSDYKDDDDK  | 4.25E-09  | 1.25E-08  | 3.59E-08  | Crude | Mutagenesis scan | FGF-R1c | NNK |
| ZMCIRWPPRQPLFWLFCGSGSDYKDDDDK  | 1.82E-08  | 1.32E-08  | 1.13E-09  | Crude | Mutagenesis scan | FGF-R1c | NNK |
| ZMCIRWPRQPLFWLFCGSGSDYKDDDDK   | 6.27E-09  | 1.80E-08  | 3.21E-09  | Crude | Mutagenesis scan | FGF-R1c | NNK |
| ZMCIRWRRQPLFWLFCGSGSDYKDDDDK   | >1.00E-05 | 6.82E-09  | 2.19E-08  | Crude | Mutagenesis scan | FGF-R1c | NNK |
| ZMCIRWPSRQPLFWLFCGSGSDYKDDDDK  | 6.25E-09  | 2.09E-08  | 1.92E-09  | Crude | Mutagenesis scan | FGF-R1c | NNK |
| ZMCIRWPTRQPLFWLFCGSGSDYKDDDDK  | 1.61E-08  | 2.04E-08  | 2.36E-09  | Crude | Mutagenesis scan | FGF-R1c | NNK |
| ZMCIRWPRQPLFWLFCGSGSDYKDDDDK   | 8.90E-09  | 1.68E-08  | 1.55E-08  | Crude | Mutagenesis scan | FGF-R1c | NNK |
| ZMCIRWVWRQPLFWLFCGSGSDYKDDDDK  | 2.14E-08  | 2.27E-07  | 6.97E-09  | Crude | Mutagenesis scan | FGF-R1c | NNK |
| ZMCIRWVYRQPLFWLFCGSGSDYKDDDDK  | 3.94E-09  | 2.37E-08  | 8.49E-09  | Crude | Mutagenesis scan | FGF-R1c | NNK |
| ZMCIRWVAAQPLFWLFCGSGSDYKDDDDK  | 1.32E-07  | 6.36E-08  | >1.00E-05 | Crude | Mutagenesis scan | FGF-R1c | NNK |
| ZMCIRWAAQPLFWLFCGSGSDYKDDDDK   | 5.06E-08  | 1.42E-08  | 2.24E-08  | Crude | Mutagenesis scan | FGF-R1c | NNK |
| ZMCIRYPARQPLFWLFCGSGSDYKDDDDK  | 6.19E-09  | 2.59E-08  | 1.86E-08  | Crude | Mutagenesis scan | FGF-R1c | NNK |
| ZMCISWPARQPLFWLFCGSGSDYKDDDDK  | 7.28E-08  | 5.59E-08  | 3.36E-09  | Crude | Mutagenesis scan | FGF-R1c | NNK |
| ZMCITWPARQPLFWLFCGSGSDYKDDDDK  | 4.03E-08  | 1.48E-07  | 3.33E-09  | Crude | Mutagenesis scan | FGF-R1c | NNK |
| ZMCIVWPARQPLFWLFCGSGSDYKDDDDK  | 2.85E-08  | 8.11E-08  | 8.76E-09  | Crude | Mutagenesis scan | FGF-R1c | NNK |
| ZMCVWPARQPLFWLFCGSGSDYKDDDDK   | 1.37E-07  | 2.16E-07  | 1.95E-09  | Crude | Mutagenesis scan | FGF-R1c | NNK |
| ZMCVYPARQPLFWLFCGSGSDYKDDDDK   | >1.00E-05 | 2.98E-07  | 1.02E-08  | Crude | Mutagenesis scan | FGF-R1c | NNK |
| ZMCKRWPARQPLFWLFCGSGSDYKDDDDK  | 1.91E-09  | 5.47E-08  | 9.84E-08  | Crude | Mutagenesis scan | FGF-R1c | NNK |
| ZMCLRWPARQPLFWLFCGSGSDYKDDDDK  | 8.73E-09  | 1.90E-07  | 3.87E-08  | Crude | Mutagenesis scan | FGF-R1c | NNK |
| ZMCPRWPARQPLFWLFCGSGSDYKDDDDK  | 1.53E-08  | >1.00E-05 | 3.19E-08  | Crude | Mutagenesis scan | FGF-R1c | NNK |
| ZMCORWPARQPLFWLFCGSGSDYKDDDDK  | 3.15E-09  | 2.69E-08  | 2.58E-08  | Crude | Mutagenesis scan | FGF-R1c | NNK |
| ZMCRRWPARQPLFWLFCGSGSDYKDDDDK  | 5.65E-09  | 1.20E-07  | 3.16E-07  | Crude | Mutagenesis scan | FGF-R1c | NNK |
| ZMCSRWPARQPLFWLFCGSGSDYKDDDDK  | 2.66E-09  | 2.47E-08  | 1.85E-08  | Crude | Mutagenesis scan | FGF-R1c | NNK |
| ZMCTRWPARQPLFWLFCGSGSDYKDDDDK  | 2.51E-09  | 2.92E-08  | 8.39E-08  | Crude | Mutagenesis scan | FGF-R1c | NNK |
| ZMCRVWPARQPLFWLFCGSGSDYKDDDDK  | 1.22E-08  | 1.61E-08  | 1.11E-08  | Crude | Mutagenesis scan | FGF-R1c | NNK |
| ZMCWRWPARQPLFWLFCGSGSDYKDDDDK  | 3.47E-09  | 3.28E-08  | 8.96E-08  | Crude | Mutagenesis scan | FGF-R1c | NNK |
| ZMZYRWPARQPLFWLFCGSGSDYKDDDDK  | 3.05E-09  | 4.93E-08  | 1.93E-08  | Crude | Mutagenesis scan | FGF-R1c | NNK |
| ZMCAPWFIRPNKMGSGSDYKDDDDK      | >1.00E-05 | >1.00E-05 | >1.00E-05 | Crude | Selection        | FGF-R3C | NNK |
| ZMCDTWNLMKLVWPCGSGSDYKDDDDK    | >1.00E-05 | >1.00E-05 | >1.00E-05 | Crude | Selection        | FGF-R3C | NNK |
| ZMCDTWTLYRFQTPCGSGSDYKDDDDK    | >1.00E-05 | >1.00E-05 | >1.00E-05 | Crude | Selection        | FGF-R3C | NNK |
| ZMCDYWNMWSRNWIKCGSGSDYKDDDDK   | >1.00E-05 | >1.00E-05 | >1.00E-05 | Crude | Selection        | FGF-R3C | NNK |
| ZMCDYWNMWSRNWIMCGSGSDYKDDDDK   | >1.00E-05 | >1.00E-05 | 5.47E-07  | Crude | Selection        | FGF-R3C | NNK |
| ZMCEMWNWYDRVWYCGSGSDYKDDDDK    | >1.00E-05 | >1.00E-05 | >1.00E-05 | Crude | Selection        | FGF-R3C | NNK |
| ZMCEMWSYINREWRDCGSGSDYKDDDDK   | >1.00E-05 | >1.00E-05 | >1.00E-05 | Crude | Selection        | FGF-R3C | NNK |
| ZMCEMWSYINREWRDCGSGSDYKDDDDK   | >1.00E-05 | >1.00E-05 | >1.00E-05 | Crude | Selection        | FGF-R3C | NNK |
| ZMCEMWSYINREWRDCGSGSDYKDDDDK   | >1.00E-05 | >1.00E-05 | >1.00E-05 | Crude | Selection        | FGF-R3C | NNK |
| ZMCEVYGYMHPHMMWCGSGSDYKDDDDK   | >1.00E-05 | >1.00E-05 | >1.00E-05 | Crude | Selection        | FGF-R3C | NNK |
| MCFFCFDLRFLCCGSGSDYKDDDDK      | >1.00E-05 | >1.00E-05 | >1.00E-05 | Crude | Selection        | FGF-R3C | NNK |
| MCFYCFDSLFLCCGSGSDYKDDDDK      | >1.00E-05 | 4.70E-07  | >1.00E-05 | Crude | Selection        | FGF-R3C | NNK |
| ZMCHPTRLHLWLCCNCGSGSDYKDDDDK   | 9.40E-08  | >1.00E-05 | >1.00E-05 | Crude | Selection        | FGF-R3C | NNK |
| ZMCHPTRLHLWLCCNCGSGSDYKDDDDK   | >1.00E-05 | 2.71E-07  | >1.00E-05 | Crude | Selection        | FGF-R3C | NNK |
| MCHPTRLHLWLCCNCGSGSDYKDDDDK    | >1.00E-05 | >1.00E-05 | >1.00E-05 | Crude | Selection        | FGF-R3C | NNK |
| ZMCHYCFNKLFLCCGSGSDYKDDDDK     | >1.00E-05 | 1.90E-08  | >1.00E-05 | Crude | Selection        | FGF-R3C | NNK |
| MCHYCFNKLFLCCGSGSDYKDDDDK      | 3.75E-07  | 3.22E-07  | >1.00E-05 | Crude | Selection        | FGF-R3C | NNK |
| ZMCHYCFNKLFLCCGSGSDYKDDDDK     | 5.22E-07  | 3.70E-08  | >1.00E-05 | Crude | Selection        | FGF-R3C | NNK |
| MCHYCFNKLFLCCGSGSDYKDDDDK      | >1.00E-05 | 4.21E-07  | >1.00E-05 | Crude | Selection        | FGF-R3C | NNK |
| ZMCHYCFNKLFLCCGSGSDYKDDDDK     | >1.00E-05 | >1.00E-05 | >1.00E-05 | Crude | Selection        | FGF-R3C | NNK |
| ZMCHYCFNRLFLCCGSGSDYKDDDDK     | >1.00E-05 | >1.00E-05 | >1.00E-05 | Crude | Selection        | FGF-R3C | NNK |
| ZMCFIDFMPFIICGSGSDYKDDDDK      | >1.00E-05 | 8.10E-08  | >1.00E-05 | Crude | Selection        | FGF-R3C | NNK |
| ZMCFIDHMPFIPCGSGSDYKDDDDK      | >1.00E-05 | 6.50E-08  | >1.00E-05 | Crude | Selection        | FGF-R3C | NNK |
| MCIFDIHMPFIPCGSGSDYKDDDDK      | >1.00E-05 | >1.00E-05 | >1.00E-05 | Crude | Selection        | FGF-R3C | NNK |
| MCIFDIHMPFIPCGSGSDYKDDDDK      | >1.00E-05 | >1.00E-05 | >1.00E-05 | Crude | Selection        | FGF-R3C | NNK |
| ZMCFIDLFLPFIFCGSGSDYKDDDDK     | >1.00E-05 | 6.40E-08  | >1.00E-05 | Crude | Selection        | FGF-R3C | NNK |
| MCIFDNWLPFIFCGSGSDYKDDDDK      | >1.00E-05 | 7.60E-08  | >1.00E-05 | Crude | Selection        | FGF-R3C | NNK |
| ZMCFDNWLPFIFCGSGSDYKDDDDK      | >1.00E-05 | 1.60E-08  | >1.00E-05 | Crude | Selection        | FGF-R3C | NNK |
| MCIFDNWLPFIFCGSGSDYKDDDDK      | >1.00E-05 | 9.10E-08  | >1.00E-05 | Crude | Selection        | FGF-R3C | NNK |
| MCIFDNWLPFIFCGSGSDYKDDDDK      | >1.00E-05 | 3.68E-05  | >1.00E-05 | Crude | Selection        | FGF-R3C | NNK |
| MCIFDTFLPFIFCGSGSDYKDDDDK      | >1.00E-05 | 3.70E-08  | >1.00E-05 | Crude | Selection        | FGF-R3C | NNK |
| ZMCFDFTLFLPFIFCGSGSDYKDDDDK    | >1.00E-05 | 3.70E-08  | >1.00E-05 | Crude | Selection        | FGF-R3C | NNK |
| MCIFDFTLFLPFIFCGSGSDYKDDDDK    | >1.00E-05 | 1.00E-07  | >1.00E-05 | Crude | Selection        | FGF-R3C | NNK |
| ZMCFDFTLFLPFIFCGSGSDYKDDDDK    | >1.00E-05 | 5.00E-09  | >1.00E-05 | Crude | Selection        | FGF-R3C | NNK |
| MCIFDTHMPFIPCGSGSDYKDDDDK      | >1.00E-05 | >1.00E-05 | >1.00E-05 | Crude | Selection        | FGF-R3C | NNK |
| MCIWDSFVFLFCGSGSDYKDDDDK       | >1.00E-05 | 8.50E-08  | >1.00E-05 | Crude | Selection        | FGF-R3C | NNK |
| ZMCKNWTFTYTLKLCGSGSDYKDDDDK    | >1.00E-05 | >1.00E-05 | >1.00E-05 | Crude | Selection        | FGF-R3C | NNK |
| MCLFDLHLPLFIFCGSGSDYKDDDDK     | >1.00E-05 | 1.72E-07  | >1.00E-05 | Crude | Selection        | FGF-R3C | NNK |
| MCLFDSFVFLFIFCGSGSDYKDDDDK     | >1.00E-05 | 2.90E-08  | >1.00E-05 | Crude | Selection        | FGF-R3C | NNK |
| ZMCLTLKQAIKRIECCGSGSDYKDDDDK   | >1.00E-05 | 5.40E-09  | 2.00E-07  | Crude | Selection        | FGF-R3C | NNK |
| MCLYDSFLPFIFCGSGSDYKDDDDK      | >1.00E-05 | 8.40E-08  | >1.00E-05 | Crude | Selection        | FGF-R3C | NNK |
| MCQQWNLYTRHWIHCGSGSDYKDDDDK    | >1.00E-05 | >1.00E-05 | >1.00E-05 | Crude | Selection        | FGF-R3C | NNK |
| ZMCQQWNLYTRHWIHCGSGSDYKDDDDK   | >1.00E-05 | >1.00E-05 | >1.00E-05 | Crude | Selection        | FGF-R3C | NNK |
| MCQQWNLYTRHWIHCGSGSDYKDDDDK    | >1.00E-05 | >1.00E-05 | >1.00E-05 | Crude | Selection        | FGF-R3C | NNK |
| ZMCQQWNLYTRHWIHCGSGSDYKDDDDK   | >1.00E-05 | >1.00E-05 | >1.00E-05 | Crude | Selection        | FGF-R3C | NNK |
| ZMCRYCFNKLFLCCGSGSDYKDDDDK     | >1.00E-05 | 3.70E-08  | >1.00E-05 | Crude | Selection        | FGF-R3C | NNK |
| MCSYCFNKLFLCCGSGSDYKDDDDK      | >1.00E-05 | 2.37E-07  | >1.00E-05 | Crude | Selection        | FGF-R3C | NNK |
| ZMCTETNGYAYWCGSGSDYKDDDDK      | >1.00E-05 | >1.00E-05 | >1.00E-05 | Crude | Selection        | FGF-R3C | NNK |
| MCTFDLFLPFIFCGSGSDYKDDDDK      | >1.00E-05 | 1.77E-07  | >1.00E-05 | Crude | Selection        | FGF-R3C | NNK |
| MCTFDLFLPFIFCGSGSDYKDDDDK      | >1.00E-05 | 4.38E-07  | >1.00E-05 | Crude | Selection        | FGF-R3C | NNK |
| MCTFDTHFPFIFCGSGSDYKDDDDK      | >1.00E-05 | 2.87E-07  | >1.00E-05 | Crude | Selection        | FGF-R3C | NNK |
| ZMCTLGQAIQALMFIHSGSDYKDDDDK    | >1.00E-05 | >1.00E-05 | >1.00E-05 | Crude | Selection        | FGF-R3C | NNK |







|                               |           |           |           |       |           |        |       |
|-------------------------------|-----------|-----------|-----------|-------|-----------|--------|-------|
| ZMCPKWLKWLFLACGSGSDYKDDDDK    | >1.00E-05 | >1.00E-05 | >1.00E-05 | Crude | Selection | FGF-R4 | NNK   |
| ZMCPKYFLWLRLMTCCGSGSDYKDDDDK  | >1.00E-05 | >1.00E-05 | 1.84E-06  | Crude | Selection | FGF-R4 | NNK   |
| ZMCPRIWYIYMLHCGSGSDYKDDDDK    | >1.00E-05 | 1.32E-05  | 1.39E-07  | Crude | Selection | FGF-R4 | NNK   |
| ZMCPRIYFWYHYLLCGSGSDYKDDDDK   | >1.00E-05 | >1.00E-05 | >1.00E-05 | Crude | Selection | FGF-R4 | NNK   |
| ZMCPVIYKILSHCGSGSDYKDDDDK     | >1.00E-05 | >1.00E-05 | 1.98E-07  | Crude | Selection | FGF-R4 | NNK   |
| ZMCPVLVYLKWLRTCCGSGSDYKDDDDK  | >1.00E-05 | 4.33E-06  | 9.40E-08  | Crude | Selection | FGF-R4 | NNK   |
| ZMCOFRFSKFWLSCGSGSDYKDDDDK    | >1.00E-05 | >1.00E-05 | >1.00E-05 | Crude | Selection | FGF-R4 | NNK   |
| ZMCOFTYSKFFMGSGSDYKDDDDK      | >1.00E-05 | >1.00E-05 | >1.00E-05 | Crude | Selection | FGF-R4 | NNK   |
| ZMCRDFVHLWFRVFCGSGSDYKDDDDK   | 2.61E-07  | >1.00E-05 | >1.00E-05 | Crude | Selection | FGF-R4 | NNK   |
| ZMCRELLYLLQRCGSGSDYKDDDDK     | >1.00E-05 | >1.00E-05 | 5.90E-08  | Crude | Selection | FGF-R4 | NNK   |
| ZMCRFIKAFNLNCGSGSDYKDDDDK     | >1.00E-05 | >1.00E-05 | >1.00E-05 | Crude | Selection | FGF-R4 | NNK   |
| ZMCSCFPLCLFICGSGSDYKDDDDK     | >1.00E-05 | >1.00E-05 | >1.00E-05 | Crude | Selection | FGF-R4 | NNK   |
| ZMCSCFPLCELFCGSGSDYKDDDDK     | >1.00E-05 | >1.00E-05 | >1.00E-05 | Crude | Selection | FGF-R4 | NNK   |
| ZMCSHCWLFKVLMLGSGSDYKDDDDK    | >1.00E-05 | >1.00E-05 | 1.80E-07  | Crude | Selection | FGF-R4 | NNK   |
| ZMCSHMWLFKVLKCGSGSDYKDDDDK    | >1.00E-05 | >1.00E-05 | >1.00E-05 | Crude | Selection | FGF-R4 | NNK   |
| ZMCSILLYKVLSCGSGSDYKDDDDK     | >1.00E-05 | >1.00E-05 | 8.40E-08  | Crude | Selection | FGF-R4 | NNK   |
| ZMCSILLYKVLRCGSGSDYKDDDDK     | >1.00E-05 | >1.00E-05 | >1.00E-05 | Crude | Selection | FGF-R4 | NNK   |
| ZMCSITIKLLRFGCGSGSDYKDDDDK    | >1.00E-05 | 5.91E-07  | 1.92E-07  | Crude | Selection | FGF-R4 | NNK   |
| ZMCFVAFYRAFMAFCGSGSDYKDDDDK   | >1.00E-05 | >1.00E-05 | 2.94E-07  | Crude | Selection | FGF-R4 | NNK   |
| ZMCFVFTWGSIMVFCGSGSDYKDDDDK   | >1.00E-05 | >1.00E-05 | >1.00E-05 | Crude | Selection | FGF-R4 | NNK   |
| ZMCFVCKWLVAIRTMGSGSDYKDDDDK   | >1.00E-05 | >1.00E-05 | 1.40E-08  | Crude | Selection | FGF-R4 | NNK   |
| ZMCFVMMWLAIRTCGSGSDYKDDDDK    | >1.00E-05 | >1.00E-05 | >1.00E-05 | Crude | Selection | FGF-R4 | NNK   |
| ZMCFVYFTLWKNWCCGSGSDYKDDDDK   | >1.00E-05 | >1.00E-05 | 5.34E-07  | Crude | Selection | FGF-R4 | NNK   |
| ZMCFVYLLMKSLKCGSGSDYKDDDDK    | >1.00E-05 | >1.00E-05 | >1.00E-05 | Crude | Selection | FGF-R4 | NNK   |
| ZMCFVSYRAYFAHCGSGSDYKDDDDK    | >1.00E-05 | 3.00E-06  | 1.02E-07  | Crude | Selection | FGF-R4 | NNK   |
| ZMCFVTYVYKTLRCGSGSDYKDDDDK    | >1.00E-05 | >1.00E-05 | 5.70E-08  | Crude | Selection | FGF-R4 | NNK   |
| ZMCFVVCYKAFVCCGSGSDYKDDDDK    | >1.00E-05 | >1.00E-05 | 3.33E-06  | Crude | Selection | FGF-R4 | NNK   |
| ZMCFVWPKWLTKLFCGSGSDYKDDDDK   | >1.00E-05 | >1.00E-05 | 1.74E-07  | Crude | Selection | FGF-R4 | NNK   |
| ZMCFWITLYKVLHACGSGSDYKDDDDK   | >1.00E-05 | 2.31E-05  | >1.00E-05 | Crude | Selection | FGF-R4 | NNK   |
| ZMCFWPIWKLVSACGSGSDYKDDDDK    | >1.00E-05 | >1.00E-05 | 2.49E-07  | Crude | Selection | FGF-R4 | NNK   |
| ZMCFWVYWTYVYKQCGSGSDYKDDDDK   | >1.00E-05 | >1.00E-05 | 2.07E-07  | Crude | Selection | FGF-R4 | NNK   |
| ZMCFWVFMPELVKCGSGSDYKDDDDK    | >1.00E-05 | >1.00E-05 | >1.00E-05 | Crude | Selection | FGF-R4 | NNK   |
| ZMCFYKLLWVKQCGSGSDYKDDDDK     | >1.00E-05 | >1.00E-05 | >1.00E-05 | Crude | Selection | FGF-R4 | NNK   |
| ZMCFYKLLWVKQRCGSGSDYKDDDDK    | >1.00E-05 | >1.00E-05 | >1.00E-05 | Crude | Selection | FGF-R4 | NNK   |
| ZMCFYKLLWVKQWCGSGSDYKDDDDK    | >1.00E-05 | >1.00E-05 | >1.00E-05 | Crude | Selection | FGF-R4 | NNK   |
| ZMCFYLYRFVFCGSGSDYKDDDDK      | >1.00E-05 | >1.00E-05 | >1.00E-05 | Crude | Selection | FGF-R4 | NNK   |
| ZMMSHCWLFKVLKCGSGSDYKDDDDK    | >1.00E-05 | >1.00E-05 | 2.39E-07  | Crude | Selection | FGF-R4 | NNK   |
| ZMMVKWLAIRTCGSGSDYKDDDDK      | >1.00E-05 | >1.00E-05 | >1.00E-05 | Crude | Selection | FGF-R4 | NNK   |
| ZMNVLLYKVLRCGSGSDYKDDDDK      | >1.00E-05 | >1.00E-05 | 1.11E-08  | Crude | Selection | FGF-R4 | T18_1 |
| ZMNVLLYKDLRHCGSGSDYKDDDDK     | >1.00E-05 | >1.00E-05 | >1.00E-05 | Crude | Selection | FGF-R4 | T18_1 |
| ZMCHLLYKLFHSCGSGSDYKDDDDK     | 6.35E-08  | >1.00E-05 | 1.14E-07  | Crude | Selection | FGF-R4 | T18_1 |
| ZMCTTTYKLVRRRCGSGSDYKDDDDK    | 6.99E-07  | 2.25E-06  | 7.18E-10  | Crude | Selection | FGF-R4 | T18_1 |
| ZMCTYVYKLFHRCGSGSDYKDDDDK     | >1.00E-05 | >1.00E-05 | 2.88E-09  | Crude | Selection | FGF-R4 | T18_1 |
| ZMCREIRYQWLYRAFCCGSGSDYKDDDDK | >1.00E-05 | >1.00E-05 | >1.00E-05 | Crude | Selection | FGF-R4 | T18_1 |
| ZMCRHLYYKLVHRCGSGSDYKDDDDK    | >1.00E-05 | >1.00E-05 | 1.79E-09  | Crude | Selection | FGF-R4 | T18_1 |
| ZMCRWVYKLVHRCGSGSDYKDDDDK     | >1.00E-05 | >1.00E-05 | 7.46E-10  | Crude | Selection | FGF-R4 | T18_1 |
| ZMCREIRYQWLYRAFCCGSGSDYKDDDDK | >1.00E-05 | >1.00E-05 | 2.72E-08  | Crude | Selection | FGF-R4 | T18_1 |
| ZMCRYVYKLVHRCGSGSDYKDDDDK     | 3.87E-07  | >1.00E-05 | 5.71E-10  | Crude | Selection | FGF-R4 | T18_1 |
| ZMCHIRYQWLYRAFCCGSGSDYKDDDDK  | >1.00E-05 | >1.00E-05 | 1.01E-08  | Crude | Selection | FGF-R4 | T18_1 |
| ZMCEVYKLVHRCGSGSDYKDDDDK      | 6.50E-07  | >1.00E-05 | 1.51E-08  | Crude | Selection | FGF-R4 | T18_1 |
| ZMCTYVYKLVHRCGSGSDYKDDDDK     | >1.00E-05 | >1.00E-05 | 1.12E-09  | Crude | Selection | FGF-R4 | T18_1 |
| ZMCPYAIYKLVHRCGSGSDYKDDDDK    | >1.00E-05 | >1.00E-05 | 1.08E-08  | Crude | Selection | FGF-R4 | T18_1 |
| ZMCEHLFYKLVHRCGSGSDYKDDDDK    | >1.00E-05 | >1.00E-05 | 5.05E-10  | Crude | Selection | FGF-R4 | T18_1 |
| ZMCELFYKLVHRCGSGSDYKDDDDK     | >1.00E-05 | >1.00E-05 | 1.80E-08  | Crude | Selection | FGF-R4 | T18_1 |
| ZMCSILYKLVHRCGSGSDYKDDDDK     | >1.00E-05 | >1.00E-05 | 1.32E-08  | Crude | Selection | FGF-R4 | T18_1 |
| ZMCEVYKLVHRCGSGSDYKDDDDK      | >1.00E-05 | >1.00E-05 | 1.22E-08  | Crude | Selection | FGF-R4 | T18_1 |
| ZMCKHLYKLVHRCGSGSDYKDDDDK     | 1.03E-06  | 9.28E-07  | 1.28E-09  | Crude | Selection | FGF-R4 | T18_1 |
| ZMCELFYKLVHRCGSGSDYKDDDDK     | 4.54E-06  | >1.00E-05 | 8.10E-08  | Crude | Selection | FGF-R4 | T18_1 |
| ZMCKYHLYKLVHRCGSGSDYKDDDDK    | 3.31E-08  | >1.00E-05 | 1.29E-09  | Crude | Selection | FGF-R4 | T18_1 |
| ZMCEYIYKLVHRCGSGSDYKDDDDK     | >1.00E-05 | >1.00E-05 | >1.00E-05 | Crude | Selection | FGF-R4 | T18_1 |
| ZMCLWYKLVHRCGSGSDYKDDDDK      | 2.06E-08  | >1.00E-05 | 4.63E-09  | Crude | Selection | FGF-R4 | T18_1 |
| ZMCAVYKLVHRCGSGSDYKDDDDK      | >1.00E-05 | >1.00E-05 | 7.32E-09  | Crude | Selection | FGF-R4 | T18_1 |
| ZMCKEYIYKLVHRCGSGSDYKDDDDK    | >1.00E-05 | >1.00E-05 | 1.66E-08  | Crude | Selection | FGF-R4 | T18_1 |
| ZMCDLYKLVHRCGSGSDYKDDDDK      | 2.10E-08  | >1.00E-05 | 1.86E-08  | Crude | Selection | FGF-R4 | T18_1 |
| ZMCAKYIYKLVHRCGSGSDYKDDDDK    | >1.00E-05 | >1.00E-05 | 9.53E-09  | Crude | Selection | FGF-R4 | T18_1 |
| ZMCAKAFYKLVHRCGSGSDYKDDDDK    | >1.00E-05 | >1.00E-05 | >1.00E-05 | Crude | Selection | FGF-R4 | T18_1 |
| ZMCPHFYKLVHRCGSGSDYKDDDDK     | 1.01E-08  | >1.00E-05 | 1.05E-08  | Crude | Selection | FGF-R4 | T18_1 |
| ZMCLWYKLVHRCGSGSDYKDDDDK      | 9.58E-08  | >1.00E-05 | 7.70E-09  | Crude | Selection | FGF-R4 | T18_1 |
| ZMCEWYKLVHRCGSGSDYKDDDDK      | 1.91E-07  | >1.00E-05 | >1.00E-05 | Crude | Selection | FGF-R4 | T18_1 |
| ZMCHRYKLVHRCGSGSDYKDDDDK      | >1.00E-05 | >1.00E-05 | 4.44E-08  | Crude | Selection | FGF-R4 | T18_1 |
| ZMCLRHYKLVHRCGSGSDYKDDDDK     | >1.00E-05 | >1.00E-05 | >1.00E-05 | Crude | Selection | FGF-R4 | T18_1 |
| ZMCKYKLVHRCGSGSDYKDDDDK       | >1.00E-05 | >1.00E-05 | >1.00E-05 | Crude | Selection | FGF-R4 | T18_1 |
| ZMCKYKLVHRCGSGSDYKDDDDK       | >1.00E-05 | >1.00E-05 | 1.36E-08  | Crude | Selection | FGF-R4 | T18_1 |
| ZMCTYDFVHRCGSGSDYKDDDDK       | >1.00E-05 | >1.00E-05 | >1.00E-05 | Crude | Selection | FGF-R4 | T18_1 |
| ZMCTYDFVHRCGSGSDYKDDDDK       | >1.00E-05 | >1.00E-05 | >1.00E-05 | Crude | Selection | FGF-R4 | T18_1 |
| ZMCTYDFVHRCGSGSDYKDDDDK       | >1.00E-05 | >1.00E-05 | 8.49E-09  | Crude | Selection | FGF-R4 | T18_1 |
| ZMCFDLHRCGSGSDYKDDDDK         | >1.00E-05 | >1.00E-05 | 1.30E-07  | Crude | Selection | FGF-R4 | T18_1 |
| ZMCDIRAYARWVFCGSGSDYKDDDDK    | >1.00E-05 | >1.00E-05 | 1.83E-07  | Crude | Selection | FGF-R4 | T18_1 |
| ZMCDSDAYARWVFCGSGSDYKDDDDK    | 1.57E-06  | >1.00E-05 | 1.04E-08  | Crude | Selection | FGF-R4 | T18_1 |
| ZMCDYDFVHRCGSGSDYKDDDDK       | >1.00E-05 | >1.00E-05 | 2.12E-08  | Crude | Selection | FGF-R4 | T18_1 |
| ZMCAWYKLVHRCGSGSDYKDDDDK      | >1.00E-05 | >1.00E-05 | >1.00E-05 | Crude | Selection | FGF-R4 | T18_1 |
| ZMCAWYKLVHRCGSGSDYKDDDDK      | 7.80E-08  | >1.00E-05 | 2.04E-06  | Crude | Selection | FGF-R4 | T18_1 |
| ZMCAWYKLVHRCGSGSDYKDDDDK      | >1.00E-05 | >1.00E-05 | 2.30E-09  | Crude | Selection | FGF-R4 | T18_1 |
| ZMCAWYKLVHRCGSGSDYKDDDDK      | >1.00E-05 | >1.00E-05 | >1.00E-05 | Crude | Selection | FGF-R4 | T18_1 |
| ZMCKYATLQWYKLVHRCGSGSDYKDDDDK | 1.14E-07  | 7.34E-06  | 6.32E-08  | Crude | Selection | FGF-R4 | T18_1 |
| ZMCPYDYDWHRCGSGSDYKDDDDK      | >1.00E-05 | >1.00E-05 | 1.58E-06  | Crude | Selection | FGF-R4 | T18_1 |
| ZMCKWKLKLVHRCGSGSDYKDDDDK     | >1.00E-05 | >1.00E-05 | 1.63E-08  | Crude | Selection | FGF-R4 | T18_1 |
| ZMCKWKLKLVHRCGSGSDYKDDDDK     | >1.00E-05 | >1.00E-05 | 6.69E-10  | Crude | Selection | FGF-R4 | T18_1 |
| ZMCKWKLKLVHRCGSGSDYKDDDDK     | 5.43E-08  | >1.00E-05 | >1.00E-05 | Crude | Selection | FGF-R4 | T18_1 |
| ZMCHWYKLVHRCGSGSDYKDDDDK      | >1.00E-05 | >1.00E-05 | 5.93E-09  | Crude | Selection | FGF-R4 | T18_1 |
| ZMCKWYKLVHRCGSGSDYKDDDDK      | >1.00E-05 | >1.00E-05 | 1.79E-09  | Crude | Selection | FGF-R4 | T18_1 |
| ZMCAWYKLVHRCGSGSDYKDDDDK      | 6.45E-08  | >1.00E-05 | >1.00E-05 | Crude | Selection | FGF-R4 | T18_1 |
| ZMCHRYKLVHRCGSGSDYKDDDDK      | >1.00E-05 | >1.00E-05 | 4.83E-09  | Crude | Selection | FGF-R4 | T18_1 |
| ZMCEVLYKLVHRCGSGSDYKDDDDK     | 4.82E-08  | >1.00E-05 | 1.28E-07  | Crude | Selection | FGF-R4 | T18_1 |
| ZMCKRHYKLVHRCGSGSDYKDDDDK     | 2.65E-07  | 8.38E-07  | >1.00E-05 | Crude | Selection | FGF-R4 | T18_1 |
| ZMCKREIKLVHRCGSGSDYKDDDDK     | >1.00E-05 | >1.00E-05 | 8.09E-09  | Crude | Selection | FGF-R4 | T18_1 |
| ZMCAKELFYKLVHRCGSGSDYKDDDDK   | >1.00E-05 | >1.00E-05 | 4.13E-08  | Crude | Selection | FGF-R4 | T18_1 |
| ZMCKRHYKLVHRCGSGSDYKDDDDK     | >1.00E-05 | 1.54E-06  | 1.35E-09  | Crude | Selection | FGF-R4 | T18_1 |
| ZMCKRHYKLVHRCGSGSDYKDDDDK     | >1.00E-05 | >1.00E-05 | 2.17E-09  | Crude | Selection | FGF-R4 | T18_1 |
| ZMCPYVYKLVHRCGSGSDYKDDDDK     | >1.00E-05 | >1.00E-05 | 9.09E-09  | Crude | Selection | FGF-R4 | T18_1 |
| ZMCTGRHYKLVHRCGSGSDYKDDDDK    | >1.00E-05 | >1.00E-05 | 9.90E-09  | Crude | Selection | FGF-R4 | T18_1 |

|                                    |           |           |           |       |           |        |       |
|------------------------------------|-----------|-----------|-----------|-------|-----------|--------|-------|
| ZMCDAYVRYWQVLHCGSGSDYKDDDDK        | >1.00E-05 | >1.00E-05 | 3.59E-08  | Crude | Selection | FGF-R4 | T18_1 |
| ZMCKYSKDLWLWYRLWCGSGSDYKDDDDK      | >1.00E-05 | >1.00E-05 | 2.34E-09  | Crude | Selection | FGF-R4 | T18_1 |
| ZMCKYKSKDLWYLRWCGSGSDYKDDDDK       | 5.02E-07  | >1.00E-05 | 2.16E-08  | Crude | Selection | FGF-R4 | T18_1 |
| ZMCKDLHLFYLLCGSGSDYKDDDDK          | 3.00E-08  | >1.00E-05 | 1.44E-08  | Crude | Selection | FGF-R4 | T18_1 |
| ZMCDKFVKWYVFRHCGSGSEEGSGSDYKDDDDK  | >1.00E-05 | >1.00E-05 | 9.11E-10  | Crude | Selection | FGF-R4 | T18_1 |
| ZMCKYKYKWSVPHCGSGSDYKDDDDK         | >1.00E-05 | >1.00E-05 | 1.66E-08  | Crude | Selection | FGF-R4 | T18_1 |
| ZMCDWYVYIKVLLKCGSGSDYKDDDDK        | >1.00E-05 | >1.00E-05 | 7.70E-09  | Crude | Selection | FGF-R4 | T18_1 |
| ZMCEYDEIWLKLYCGSGSDYKDDDDK         | >1.00E-05 | >1.00E-05 | 9.41E-09  | Crude | Selection | FGF-R4 | T18_1 |
| ZMZYHRHFQNHWYKCGSGSEEGSGSDYKDDDDK  | >1.00E-05 | >1.00E-05 | >1.00E-05 | Crude | Selection | FGF-R4 | T18_1 |
| ZMZYHRFPNSKIWRKCGSGSDYKDDDDK       | >1.00E-05 | >1.00E-05 | 2.14E-07  | Crude | Selection | FGF-R4 | T18_1 |
| ZMCEQRSRWSNYYPCGSGSDYKDDDDK        | >1.00E-05 | >1.00E-05 | >1.00E-05 | Crude | Selection | FGF-R4 | T18_1 |
| ZMZYTRFWTEEWQPCGSGSDYKDDDDK        | >1.00E-05 | >1.00E-05 | >1.00E-05 | Crude | Selection | FGF-R4 | T18_1 |
| ZMZYTRHPYEALWHQCGSGSDYKDDDDK       | >1.00E-05 | >1.00E-05 | >1.00E-05 | Crude | Selection | FGF-R4 | T18_1 |
| ZMCTHRHPYETLWHQCGSGSDYKDDDDK       | >1.00E-05 | >1.00E-05 | >1.00E-05 | Crude | Selection | FGF-R4 | T18_1 |
| ZMZYTRFYNWEKWLQCGSGSDYKDDDDK       | 1.65E-08  | >1.00E-05 | >1.00E-05 | Crude | Selection | FGF-R4 | T18_1 |
| ZMCTRNKNKWEWRPCGSGSDYKDDDDK        | >1.00E-05 | >1.00E-05 | >1.00E-05 | Crude | Selection | FGF-R4 | T18_1 |
| ZMCEHRHPYGHWEQCGSGSDYKDDDDK        | >1.00E-05 | >1.00E-05 | >1.00E-05 | Crude | Selection | FGF-R4 | T18_1 |
| ZMCFHIKANYGFVYVCGSGSDYKDDDDK       | >1.00E-05 | >1.00E-05 | >1.00E-05 | Crude | Selection | FGF-R4 | T18_2 |
| ZMCLHIKANYGFVYVCGSGSDYKDDDDK       | >1.00E-05 | >1.00E-05 | >1.00E-05 | Crude | Selection | FGF-R4 | T18_2 |
| ZMCTYTYVFNQTYVHCGSGSDYKDDDDK       | >1.00E-05 | >1.00E-05 | >1.00E-05 | Crude | Selection | FGF-R4 | T18_2 |
| ZMZYVEYVDFRLTVTCGSGSDYKDDDDK       | >1.00E-05 | >1.00E-05 | >1.00E-05 | Crude | Selection | FGF-R4 | T18_2 |
| ZMCEYTLFGYHYIKCGSGSDYKDDDDK        | >1.00E-05 | >1.00E-05 | >1.00E-05 | Crude | Selection | FGF-R4 | T18_2 |
| ZMCAEYVDFRLTVTCGSGSDYKDDDDK        | >1.00E-05 | >1.00E-05 | 2.82E-08  | Crude | Selection | FGF-R4 | T18_2 |
| ZMCHNKLYYYLLYVCGSGSDYKDDDDK        | >1.00E-05 | >1.00E-05 | 3.56E-08  | Crude | Selection | FGF-R4 | T18_2 |
| ZMZYKRDLYYLVKCGSGSDYKDDDDK         | >1.00E-05 | >1.00E-05 | 8.41E-09  | Crude | Selection | FGF-R4 | T18_2 |
| ZMCDKRHLYYLLVCGSGSDYKDDDDK         | >1.00E-05 | >1.00E-05 | 3.18E-08  | Crude | Selection | FGF-R4 | T18_2 |
| ZMCDKYVWVYKWIARWCGSGSDYKDDDDK      | >1.00E-05 | >1.00E-05 | 1.09E-09  | Crude | Selection | FGF-R4 | T18_2 |
| ZMCEREFLYYLLYKCGSGSDYKDDDDK        | >1.00E-05 | >1.00E-05 | >1.00E-05 | Crude | Selection | FGF-R4 | T18_2 |
| ZMCEWEEFTKFWWTCGSGSDYKDDDDK        | >1.00E-05 | >1.00E-05 | 1.37E-09  | Crude | Selection | FGF-R4 | T18_2 |
| ZMCFKQHLFYLLHCGSGSDYKDDDDK         | >1.00E-05 | >1.00E-05 | 2.16E-08  | Crude | Selection | FGF-R4 | T18_2 |
| ZMZYKFKFITLYKVLVCGSGSDYKDDDDK      | 5.05E-07  | 7.89E-08  | 1.28E-08  | Crude | Selection | FGF-R4 | T18_2 |
| ZMCHDKFITLYKVLVCGSGSDYKDDDDK       | >1.00E-05 | >1.00E-05 | 4.82E-08  | Crude | Selection | FGF-R4 | T18_2 |
| ZMZYEVLLWYQQRHCGSGSDYKDDDDK        | >1.00E-05 | >1.00E-05 | 1.18E-08  | Crude | Selection | FGF-R4 | T18_2 |
| ZMCDRFDIWIYKLCFCGSGSDYKDDDDK       | 5.36E-06  | 3.40E-07  | 2.02E-08  | Crude | Selection | FGF-R4 | T18_2 |
| ZMCKYSVYVYKWRKCGSGSDYKDDDDK        | >1.00E-05 | >1.00E-05 | >1.00E-05 | Crude | Selection | FGF-R4 | T18_2 |
| ZMCEFEIRWYQYRQKCGSGSDYKDDDDK       | >1.00E-05 | >1.00E-05 | 1.62E-08  | Crude | Selection | FGF-R4 | T18_2 |
| ZMCDNRWRVRYQIFCGSGSDYKDDDDK        | >1.00E-05 | >1.00E-05 | 6.64E-09  | Crude | Selection | FGF-R4 | T18_2 |
| ZMCEWEEIWIYKLCFCGSGSDYKDDDDK       | >1.00E-05 | >1.00E-05 | 1.09E-08  | Crude | Selection | FGF-R4 | T18_2 |
| ZMCDNRWRVRYQIFCGSGSDYKDDDDK        | >1.00E-05 | >1.00E-05 | >1.00E-05 | Crude | Selection | FGF-R4 | T18_2 |
| ZMCDLRELFYLLVCGSGSDYKDDDDK         | >1.00E-05 | >1.00E-05 | 2.71E-08  | Crude | Selection | FGF-R4 | T18_2 |
| ZMCDHRHLYYYLLVCGSGSDYKDDDDK        | >1.00E-05 | >1.00E-05 | 5.29E-09  | Crude | Selection | FGF-R4 | T18_2 |
| ZMCKFDLDFYKWIWCGSGSDYKDDDDK        | >1.00E-05 | >1.00E-05 | 8.60E-09  | Crude | Selection | FGF-R4 | T18_2 |
| ZMCHFRDYYVYVWQCGSGSDYKDDDDK        | >1.00E-05 | >1.00E-05 | 7.33E-08  | Crude | Selection | FGF-R4 | T18_2 |
| ZMCKYHRDLRYVFLHCGSGSDYKDDDDK       | >1.00E-05 | >1.00E-05 | 2.29E-08  | Crude | Selection | FGF-R4 | T18_2 |
| ZMZYVHKWIRYVQIFCGSGSEEGSGSDYKDDDDK | >1.00E-05 | >1.00E-05 | 5.80E-09  | Crude | Selection | FGF-R4 | T18_2 |
| ZMCFWHRKSDFWLQFCGSGSDYKDDDDK       | >1.00E-05 | >1.00E-05 | 3.67E-07  | Crude | Selection | FGF-R4 | T18_2 |
| ZMZWVFRNHRWQICGSGSDYKDDDDK         | >1.00E-05 | >1.00E-05 | 8.83E-09  | Crude | Selection | FGF-R4 | T18_2 |
| ZMCFWKKLHVFWVDCGSGSDYKDDDDK        | 2.27E-08  | >1.00E-05 | >1.00E-05 | Crude | Selection | FGF-R4 | T18_2 |
| ZMZWVYVQHSFYWERLQCGSGSDYKDDDDK     | >1.00E-05 | >1.00E-05 | 3.29E-08  | Crude | Selection | FGF-R4 | T18_2 |
| ZMZWVWQHPLFWKICGSGSDYKDDDDK        | >1.00E-05 | >1.00E-05 | 2.15E-08  | Crude | Selection | FGF-R4 | T18_2 |
| ZMCFRHKRSDFWLQFCGSGSDYKDDDDK       | >1.00E-05 | >1.00E-05 | >1.00E-05 | Crude | Selection | FGF-R4 | T18_2 |
| ZMCEHRHPYSNFWLQCGSGSDYKDDDDK       | >1.00E-05 | >1.00E-05 | >1.00E-05 | Crude | Selection | FGF-R4 | T18_2 |
| ZMCEHRHPFTQVWLRGSGSDYKDDDDK        | >1.00E-05 | >1.00E-05 | >1.00E-05 | Crude | Selection | FGF-R4 | T18_2 |
| ZMCEHRHPYFAFWHECGSGSDYKDDDDK       | >1.00E-05 | >1.00E-05 | >1.00E-05 | Crude | Selection | FGF-R4 | T18_2 |
| ZMZYVHRHRFEVHWVCGSGSDYKDDDDK       | >1.00E-05 | >1.00E-05 | >1.00E-05 | Crude | Selection | FGF-R4 | T18_2 |
| ZMCAYRHIYEPYWHSCGSGSDYKDDDDK       | >1.00E-05 | >1.00E-05 | >1.00E-05 | Crude | Selection | FGF-R4 | T18_2 |
| ZMCEHKHPFERVWRSRSGSGSDYKDDDDK      | >1.00E-05 | >1.00E-05 | >1.00E-05 | Crude | Selection | FGF-R4 | T18_2 |
| ZMCEYRHKFEERWVHCGSGSDYKDDDDK       | >1.00E-05 | >1.00E-05 | >1.00E-05 | Crude | Selection | FGF-R4 | T18_2 |
| ZMCEHRHPYSNFWLQCGSGSDYKDDDDK       | >1.00E-05 | >1.00E-05 | >1.00E-05 | Crude | Selection | FGF-R4 | T18_2 |
| ZMZYTRHPKRWYVCGSGSEEGSGSDYKDDDDK   | >1.00E-05 | >1.00E-05 | >1.00E-05 | Crude | Selection | FGF-R4 | T18_2 |
| ZMZYTKAYWHPWRPCGSGSDYKDDDDK        | >1.00E-05 | 3.15E-06  | >1.00E-05 | Crude | Selection | FGF-R4 | T18_2 |
| ZMZYTRKPFVFFWRLCGSGSDYKDDDDK       | >1.00E-05 | >1.00E-05 | 1.68E-07  | Crude | Selection | FGF-R4 | T18_2 |
| ZMZYTRHKFDHRWRACGSGSEEGSGSDYKDDDDK | >1.00E-05 | >1.00E-05 | >1.00E-05 | Crude | Selection | FGF-R4 | T18_2 |
| ZMZYTRDRYELHWRLCGSGSDYKDDDDK       | >1.00E-05 | >1.00E-05 | >1.00E-05 | Crude | Selection | FGF-R4 | T18_2 |
| ZMZYTRHKFDQYVWPCGSGSDYKDDDDK       | >1.00E-05 | >1.00E-05 | >1.00E-05 | Crude | Selection | FGF-R4 | T18_2 |
| ZMCTHRHFEQFVHLCGSGSDYKDDDDK        | >1.00E-05 | >1.00E-05 | >1.00E-05 | Crude | Selection | FGF-R4 | T18_2 |
| ZMZYTKATVFSQVWLCGSGSDYKDDDDK       | >1.00E-05 | >1.00E-05 | >1.00E-05 | Crude | Selection | FGF-R4 | T18_2 |
| ZMZYTRRFKQDQWVHCGSGSDYKDDDDK       | >1.00E-05 | >1.00E-05 | >1.00E-05 | Crude | Selection | FGF-R4 | T18_2 |
| ZMZYTKYFYPWRICGSGSDYKDDDDK         | >1.00E-05 | >1.00E-05 | >1.00E-05 | Crude | Selection | FGF-R4 | T18_2 |
| ZMCTTRKNKWEWRPCGSGSDYKDDDDK        | >1.00E-05 | >1.00E-05 | >1.00E-05 | Crude | Selection | FGF-R4 | T18_2 |
| ZMZYTKSFYVPIWVWVCGSGSDYKDDDDK      | >1.00E-05 | >1.00E-05 | >1.00E-05 | Crude | Selection | FGF-R4 | T18_2 |
| ZMZYTRLNKHAQWQCGSGSDYKDDDDK        | >1.00E-05 | >1.00E-05 | 1.49E-07  | Crude | Selection | FGF-R4 | T18_2 |
| ZMCTDLYYLLWQRYVCGSGSDYKDDDDK       | >1.00E-05 | >1.00E-05 | 9.77E-09  | Crude | Selection | FGF-R4 | T18_2 |
| ZMCDNLFYLLWRKACGSGSDYKDDDDK        | >1.00E-05 | >1.00E-05 | 1.45E-09  | Crude | Selection | FGF-R4 | T18_2 |
| ZMCKHLFYKLRKACGSGSDYKDDDDK         | >1.00E-05 | >1.00E-05 | 6.54E-09  | Crude | Selection | FGF-R4 | T18_2 |
| ZMCDVLFYKLRKLCGSGSDYKDDDDK         | >1.00E-05 | >1.00E-05 | 9.23E-09  | Crude | Selection | FGF-R4 | T18_2 |
| ZMCPYTKYVWVWVHSCGSGSDYKDDDDK       | >1.00E-05 | >1.00E-05 | 3.24E-09  | Crude | Selection | FGF-R4 | T18_2 |
| ZMCEHLYYLLSHRRRCGSGSDYKDDDDK       | 1.72E-07  | >1.00E-05 | 7.09E-09  | Crude | Selection | FGF-R4 | T18_2 |
| ZMCRELFYRFWQKTCGSGSDYKDDDDK        | >1.00E-05 | >1.00E-05 | 1.44E-08  | Crude | Selection | FGF-R4 | T18_2 |
| ZMCRHLAYWKLWHRKCGSGSDYKDDDDK       | >1.00E-05 | >1.00E-05 | 7.81E-09  | Crude | Selection | FGF-R4 | T18_2 |
| ZMCDIYKILRSLCGSGSDYKDDDDK          | >1.00E-05 | 2.54E-09  | 4.13E-09  | Crude | Selection | FGF-R4 | T18_2 |
| ZMCDLFYLLQHKKVCGSGSDYKDDDDK        | >1.00E-05 | >1.00E-05 | 7.57E-09  | Crude | Selection | FGF-R4 | T18_2 |
| ZMZYVQYRWRVRSICGSGSDYKDDDDK        | >1.00E-05 | >1.00E-05 | 3.89E-09  | Crude | Selection | FGF-R4 | T18_2 |
| ZMCEVWYKIQYRLCGSGSDYKDDDDK         | >1.00E-05 | >1.00E-05 | 2.14E-08  | Crude | Selection | FGF-R4 | T18_2 |
| ZMCDLFYLLFKRRKCGSGSEEGSGSDYKDDDDK  | >1.00E-05 | >1.00E-05 | 9.60E-09  | Crude | Selection | FGF-R4 | T18_2 |
| ZMCHLYYLLVHRRDCGSGSDYKDDDDK        | >1.00E-05 | >1.00E-05 | 6.08E-09  | Crude | Selection | FGF-R4 | T18_2 |
| ZMZYVYKILRSLCGSGSDYKDDDDK          | >1.00E-05 | >1.00E-05 | >1.00E-05 | Crude | Selection | FGF-R4 | T18_2 |
| ZMZYVWVYRWIRRRRCGSGSDYKDDDDK       | >1.00E-05 | >1.00E-05 | >1.00E-05 | Crude | Selection | FGF-R4 | T18_2 |
| ZMZYVWVYKQRKHCGSGSDYKDDDDK         | >1.00E-05 | >1.00E-05 | 3.38E-09  | Crude | Selection | FGF-R4 | T18_2 |
| ZMZYTELWYKIRRRRCGSGSDYKDDDDK       | 1.12E-06  | >1.00E-05 | 6.00E-09  | Crude | Selection | FGF-R4 | T18_2 |
| ZMZYVWVYRKYKQCGSGSDYKDDDDK         | >1.00E-05 | >1.00E-05 | 2.16E-08  | Crude | Selection | FGF-R4 | T18_2 |
| ZMCKIWLKARFVCGSGSDYKDDDDK          | >1.00E-05 | >1.00E-05 | 7.32E-09  | Crude | Selection | FGF-R4 | T18_2 |
| ZMZYVWVYQYWRKVCGSGSDYKDDDDK        | >1.00E-05 | >1.00E-05 | 2.17E-08  | Crude | Selection | FGF-R4 | T18_2 |
| ZMCFNHWYRWIRRRRCGSGSDYKDDDDK       | >1.00E-05 | >1.00E-05 | 3.12E-09  | Crude | Selection | FGF-R4 | T18_2 |
| ZMCKNHLYYLLFKHCGSGSDYKDDDDK        | >1.00E-05 | >1.00E-05 | 8.86E-09  | Crude | Selection | FGF-R4 | T18_2 |
| ZMCPRYVLYKLFHHCGSGSDYKDDDDK        | >1.00E-05 | >1.00E-05 | 8.28E-09  | Crude | Selection | FGF-R4 | T18_2 |
| ZMCKRHITYWKLWHFCGSGSEEGSGSDYKDDDDK | >1.00E-05 | >1.00E-05 | 9.69E-09  | Crude | Selection | FGF-R4 | T18_2 |
| ZMCHDYVYKVLVHRCGSGSDYKDDDDK        | >1.00E-05 | >1.00E-05 | 1.73E-08  | Crude | Selection | FGF-R4 | T18_2 |
| ZMCRRELYYLLYSKCGSGSDYKDDDDK        | >1.00E-05 | >1.00E-05 | 5.23E-09  | Crude | Selection | FGF-R4 | T18_2 |
| ZMCDRLILYRIVHCGSGSDYKDDDDK         | >1.00E-05 | >1.00E-05 | 2.18E-08  | Crude | Selection | FGF-R4 | T18_2 |
| ZMCPYEIKYVWVWQCGSGSDYKDDDDK        | >1.00E-05 | >1.00E-05 | 1.42E-08  | Crude | Selection | FGF-R4 | T18_2 |



|                                   |           |           |           |          |           |        |       |
|-----------------------------------|-----------|-----------|-----------|----------|-----------|--------|-------|
| ZMCNKHLYYYLLFKQCGSGSDYKDDDDK      | >1.00E-05 | >1.00E-05 | 1.00E-09  | Crude    | Selection | FGF-R4 | T18_2 |
| ZMCIYRLSDFWVCGSGSDYKDDDDK         | 5.34E-08  | >1.00E-05 | 7.01E-08  | Purified | Selection | FGF-R4 | NNK   |
| ZMCIYRLSDFWVCGSGSDYKDDDDK         | >1.00E-05 | >1.00E-05 | >1.00E-05 | Purified | Selection | FGF-R4 | NNK   |
| ZMCLVSIYKIMRTCGSGSDYKDDDDK        | >1.00E-05 | >1.00E-05 | >1.00E-05 | Purified | Selection | FGF-R4 | NNK   |
| ZMCHVILWRSWRYCGSGSDYKDDDDK        | >1.00E-05 | >1.00E-05 | 5.13E-08  | Purified | Selection | FGF-R4 | NNK   |
| ZMCHLAYYLAFRSCGSGSDYKDDDDK        | >1.00E-05 | >1.00E-05 | 8.61E-08  | Purified | Selection | FGF-R4 | NNK   |
| ZMCVTYWYKVTLCRCGSGSDYKDDDDK       | >1.00E-05 | >1.00E-05 | >1.00E-05 | Purified | Selection | FGF-R4 | NNK   |
| ZMCFKHPWFFAWLCGSGSDYKDDDDK        | >1.00E-05 | >1.00E-05 | 2.33E-07  | Purified | Selection | FGF-R4 | NNK   |
| ZMCKMFLAHKRFKCGSGSDYKDDDDK        | >1.00E-05 | >1.00E-05 | 3.58E-07  | Purified | Selection | FGF-R4 | NNK   |
| ZMCPERLFYWLLVCGSGSDYKDDDDK        | >1.00E-05 | >1.00E-05 | 4.43E-07  | Purified | Selection | FGF-R4 | NNK   |
| ZMCEPWITYYKLVKCGSGSDYKDDDDK       | >1.00E-05 | >1.00E-05 | 4.78E-07  | Purified | Selection | FGF-R4 | NNK   |
| ZMCTTLYYYKLWRRCGSGSEEGSGSDYKDDDDK | >1.00E-05 | >1.00E-05 | >1.00E-05 | Purified | Selection | FGF-R4 | T18_1 |
| ZMCKHLYYYLLWKKCGSGSEEGSGSDYKDDDDK | >1.00E-05 | 5.19E-07  | 1.60E-09  | Purified | Selection | FGF-R4 | T18_1 |
| ZMCNVLLYKVLRHCGSGSDYKDDDDK        | >1.00E-05 | 1.15E-07  | 5.43E-07  | Purified | Selection | FGF-R4 | T18_1 |
| ZMCESDAYRWKLWVCGSGSDYKDDDDK       | >1.00E-05 | >1.00E-05 | 1.54E-08  | Purified | Selection | FGF-R4 | T18_1 |
| ZMCYTRFYRWKWLQCGSGSDYKDDDDK       | >1.00E-05 | >1.00E-05 | >1.00E-05 | Purified | Selection | FGF-R4 | T18_1 |
| ZMCYHRPPNSKIWRKCGSGSDYKDDDDK      | >1.00E-05 | >1.00E-05 | 5.24E-07  | Purified | Selection | FGF-R4 | T18_1 |
| ZMCEREVLYWLLVTCGSGSDYKDDDDK       | >1.00E-05 | >1.00E-05 | 3.78E-07  | Purified | Selection | FGF-R4 | T18_1 |
| ZMCYLDFFYSYRYWACGSGSDYKDDDDK      | 1.50E-08  | 3.70E-08  | >1.00E-05 | Purified | Selection | FGF-R4 | T18_1 |
| ZMCNVLLYKDLRHCGSGSDYKDDDDK        | >1.00E-05 | >1.00E-05 | >1.00E-05 | Purified | Selection | FGF-R4 | T18_1 |
| ZMCNDLFYLLWRKACGSGSDYKDDDDK       | >1.00E-05 | >1.00E-05 | 6.02E-07  | Purified | Selection | FGF-R4 | T18_2 |
| ZMCYNKFITLYKVLVYCGSGSDYKDDDDK     | >1.00E-05 | >1.00E-05 | 7.90E-07  | Purified | Selection | FGF-R4 | T18_2 |
| ZMCENKVLFFYLLWCGSGSDYKDDDDK       | >1.00E-05 | >1.00E-05 | 3.21E-07  | Purified | Selection | FGF-R4 | T18_2 |
| ZMCDKYVWVYKWIWRGSGSDYKDDDDK       | 0.00E+00  | 9.10E-08  | 4.11E-07  | Purified | Selection | FGF-R4 | T18_2 |
| ZMCFWKKLHVFWVKDCGSGSDYKDDDDK      | 1.70E-08  | 3.70E-09  | 1.00E-10  | Purified | Selection | FGF-R4 | T18_2 |
| ZMCEHLYYYLLSHRRCGSGSDYKDDDDK      | >1.00E-05 | >1.00E-05 | 3.20E-09  | Purified | Selection | FGF-R4 | T18_2 |
| ZMCYTKAYWHEPWRPCGSGSDYKDDDDK      | >1.00E-05 | >1.00E-05 | >1.00E-05 | Purified | Selection | FGF-R4 | T18_2 |
| ZMCNKHLYYYLLFKQCGSGSDYKDDDDK      | 2.20E-06  | 2.71E-06  | 2.60E-09  | Purified | Selection | FGF-R4 | T18_2 |
