# Supplementary material for: Identification and engineering of potent cyclic peptides with selective or promiscuous binding through biochemical profiling and bioinformatic data analysis
Source: Royal Society of Chemistry journal article supplement (doi:10.1039/d3cb00168g), 2023-11-14
Supplement: d3cb00168g5.pdf [file d3cb00168g5.pdf]

| sequence      | R0  | R1  | R2  | R3   | R4    | R5     |
|---------------|-----|-----|-----|------|-------|--------|
| CIFDIHMPFIPC  | 306 | 265 | 570 | 7272 | 68087 | 189541 |
| CVFDSFLPFIIIC | 110 | 83  | 218 | 2662 | 29885 | 52987  |
| CIFDTFLPFIFC  | 55  | 45  | 105 | 1572 | 16912 | 29817  |
| CTFDLFLPFIFC  | 63  | 58  | 283 | 5696 | 21253 | 17922  |
| CVYDIFVPFIFC  | 40  | 39  | 147 | 2480 | 17473 | 17161  |
| CLYDSFLPFIFC  | 48  | 30  | 149 | 3189 | 17133 | 14658  |
| CIFDNWLPFIIYC | 46  | 29  | 203 | 3063 | 20159 | 12072  |
| CVFDLFLPFIFC  | 27  | 31  | 100 | 1747 | 10834 | 11879  |
| CVYDLFLPFIIYC | 35  | 22  | 136 | 2344 | 14828 | 9697   |
| CTFDLFLPFIFC  | 26  | 23  | 126 | 2076 | 12579 | 9578   |
| CVFDSFLPFILC  | 23  | 24  | 83  | 1145 | 7916  | 9373   |
| CLFDIFLPFIFC  | 28  | 22  | 127 | 3167 | 7519  | 8178   |
| CLFDSFVPFIFC  | 32  | 24  | 160 | 3877 | 11592 | 8114   |
| CVFDPHFIFIPC  | 18  | 12  | 154 | 2198 | 8903  | 7874   |
| CVFDSFLPFIFC  | 15  | 16  | 13  | 81   | 2736  | 7822   |
| CIFDLFVPFIFC  | 13  | 14  | 82  | 1480 | 7464  | 7267   |
| CIFDIFMPFILC  | 23  | 10  | 92  | 1415 | 7618  | 6570   |
| CCFDSFLPFIFC  | 18  | 26  | 135 | 2185 | 10361 | 6245   |
| CLFDLFLPFIFC  | 19  | 9   | 74  | 2484 | 6956  | 5986   |
| CLFDIFLPFIIIC | 8   | 16  | 81  | 1157 | 6078  | 5648   |
| CIFDLFCPFIVC  | 27  | 16  | 85  | 1887 | 8101  | 5208   |
| CLFDLFCPFIFC  | 21  | 14  | 148 | 3966 | 6748  | 4372   |
| CLFDLTFVPFIFC | 36  | 19  | 131 | 2886 | 8584  | 4227   |
| CIFDIFMPFIPC  | 7   | 6   | 14  | 126  | 1720  | 3852   |
| CIFDNWLPFIFC  | 10  | 5   | 6   | 110  | 2560  | 3301   |
| CIFDTFLPFIIIC | 10  | 4   | 2   | 17   | 602   | 3110   |
| CIFDTFLPFILC  | 5   | 5   | 18  | 110  | 1297  | 2960   |
| CVFDSFLPFIPC  | 11  | 1   | 9   | 36   | 1353  | 2397   |
| CLFDSFLPFILC  | 12  | 9   | 135 | 1916 | 5081  | 2360   |
| CVFDIHMPFIPC  | 6   | 2   | 7   | 128  | 988   | 2271   |
| CTFDIFLPFILC  | 9   | 5   | 72  | 1285 | 4659  | 2211   |
| CVYDIFVPFIFC  | 2   | 9   | 4   | 49   | 1488  | 2196   |
| CLFDSFLPFIFC  | 7   | 6   | 7   | 125  | 1297  | 2039   |
| CVFDVFCPFIFC  | 7   | 13  | 84  | 1620 | 6316  | 2023   |
| CIFDTFLPFIIYC | 3   | 2   | 3   | 33   | 796   | 2010   |
| CVYDLFLPFIFC  | 7   | 0   | 6   | 83   | 1866  | 1954   |
| CIFDIFMPFIFC  | 4   | 1   | 2   | 36   | 875   | 1953   |
| CIFDIHMPFILC  | 8   | 1   | 7   | 41   | 1640  | 1927   |
| CLFDIFCPFILC  | 4   | 6   | 106 | 1755 | 4931  | 1922   |
| CIWDSFVPFILC  | 9   | 11  | 75  | 1235 | 5678  | 1919   |
| CFYDLFLPFIFC  | 17  | 10  | 60  | 1200 | 5301  | 1859   |
| CCFDIFLPFIFC  | 5   | 6   | 54  | 717  | 2962  | 1832   |
| CTFDLFLPFIIYC | 3   | 9   | 7   | 129  | 1192  | 1827   |
| CIFDSFFPFIFC  | 15  | 5   | 186 | 1819 | 4114  | 1702   |
| CVFDSFLPFVLC  | 10  | 17  | 129 | 1623 | 5245  | 1677   |
| CTFDIFLPFIFC  | 4   | 2   | 7   | 58   | 858   | 1459   |
| CTFDVFLPFIFC  | 10  | 3   | 86  | 1634 | 4236  | 1439   |
| CIWDSFVPFIFC  | 5   | 2   | 12  | 179  | 2011  | 1429   |
| CIFDTHMPFIFC  | 2   | 1   | 1   | 64   | 474   | 1413   |
| CLFDLFPFVFC   | 15  | 9   | 76  | 1495 | 3911  | 1386   |
| CIFDIHMPFTPC  | 4   | 2   | 8   | 160  | 724   | 1336   |

|               |    |   |     |      |      |      |
|---------------|----|---|-----|------|------|------|
| CIFDLSPFIFC   | 4  | 2 | 32  | 401  | 1806 | 1229 |
| CLFDLHLPFIFC  | 12 | 3 | 77  | 932  | 3547 | 1228 |
| CTFDLFLPFIPC  | 1  | 4 | 4   | 9    | 507  | 1210 |
| CLFDSFVPFVFC  | 14 | 9 | 109 | 1619 | 5010 | 1192 |
| CVFDLFLPFIIYC | 3  | 2 | 2   | 33   | 615  | 1180 |
| CVFDIFFPVLC   | 12 | 7 | 84  | 1078 | 3657 | 1140 |
| CTFDLFLPFIIIC | 3  | 5 | 6   | 30   | 678  | 1097 |
| CIFDSFFPFIFC  | 6  | 7 | 65  | 785  | 2734 | 996  |
| CIFDNWLPFIIIC | 0  | 1 | 1   | 3    | 209  | 945  |
| CIFDLFAPFIIYC | 2  | 3 | 57  | 481  | 2483 | 902  |
| CTFDLFLPFIIIC | 2  | 2 | 0   | 21   | 457  | 878  |
| CIFDNWLPFIIIC | 3  | 1 | 2   | 16   | 540  | 842  |
| CTFDTHFPFITC  | 7  | 7 | 77  | 1194 | 2962 | 832  |
| CVFDLFLPFITFC | 4  | 5 | 58  | 745  | 2684 | 817  |
| CLFDIFCPFIFC  | 0  | 1 | 2   | 82   | 654  | 816  |
| CLFDSFLPFIIIC | 2  | 2 | 3   | 71   | 554  | 816  |
| CLYDSFLPFIIIC | 0  | 1 | 0   | 10   | 531  | 810  |
| CVFDLFLPFIIIC | 1  | 3 | 2   | 17   | 346  | 804  |
| CIFDLFCPFIFC  | 1  | 1 | 4   | 14   | 380  | 712  |
| CVFDLFLPFILC  | 1  | 1 | 9   | 68   | 609  | 681  |
| CIFDIFMPFIIIC | 0  | 0 | 2   | 9    | 265  | 676  |
| CTFDLFLPFIFC  | 2  | 0 | 3   | 14   | 571  | 657  |
| CCFDSFLPFIIIC | 2  | 2 | 3   | 16   | 409  | 656  |
| CVFDSLLPFIFC  | 6  | 6 | 50  | 782  | 2044 | 615  |
| CTFDIHMPFIPC  | 1  | 2 | 4   | 43   | 350  | 607  |
| CTFDLFLPFILC  | 1  | 1 | 12  | 185  | 1011 | 605  |
| CIFDNWLPFILC  | 2  | 0 | 2   | 3    | 273  | 599  |
| CLFDIFLPFIPC  | 1  | 1 | 2   | 9    | 384  | 599  |
| CVFDLFLPFIPC  | 2  | 0 | 2   | 12   | 283  | 599  |
| CTFDLFLPFIIYC | 1  | 1 | 2   | 32   | 552  | 590  |
| CLFDVFCDFIFC  | 14 | 6 | 113 | 2680 | 2477 | 587  |
| CLFDLFLPFIIIC | 3  | 2 | 6   | 44   | 336  | 571  |
| CIFDIHMPILIPC | 2  | 0 | 5   | 59   | 237  | 566  |
| CIFDLFVPFIIYC | 2  | 2 | 5   | 32   | 480  | 564  |
| CLFDLFFPFIPC  | 4  | 2 | 265 | 1892 | 1693 | 564  |
| CIFDLFVPFIIIC | 1  | 0 | 2   | 10   | 221  | 556  |
| CIFDLFVPFILC  | 4  | 1 | 6   | 56   | 453  | 551  |
| CLFDIFLPFIIYC | 2  | 0 | 5   | 62   | 393  | 550  |
| CIFDIHMPFIFC  | 0  | 0 | 3   | 9    | 439  | 549  |
| CIFDSFLPFVFC  | 3  | 2 | 5   | 54   | 412  | 537  |
| CIFDLWLPFITAC | 1  | 4 | 11  | 441  | 1403 | 534  |
| CVFDIFFPVFC   | 1  | 1 | 4   | 65   | 509  | 523  |
| CVYDIFVPFIPC  | 3  | 0 | 2   | 14   | 450  | 519  |
| CIFDLFCPFIIIC | 0  | 0 | 2   | 3    | 225  | 517  |
| CIFDLFLPFIFC  | 1  | 1 | 1   | 20   | 253  | 508  |
| CLFDPFLSFIPC  | 8  | 4 | 148 | 3132 | 2069 | 505  |
| CVFDSFLPFIVC  | 3  | 2 | 1   | 23   | 341  | 505  |
| CVYDIFVPFILC  | 2  | 1 | 2   | 8    | 349  | 482  |
| CIFDTHFPFILC  | 2  | 3 | 1   | 11   | 174  | 476  |
| CLFDSFVPFIIIC | 0  | 2 | 0   | 22   | 335  | 468  |
| CCFDSFLPFIVIC | 1  | 9 | 52  | 826  | 1905 | 467  |
| CVFDLFLPFIFC  | 0  | 1 | 0   | 25   | 241  | 465  |

|               |    |   |    |      |      |     |               |   |   |    |     |      |     |
|---------------|----|---|----|------|------|-----|---------------|---|---|----|-----|------|-----|
| CLFDIFLPPFILC | 3  | 0 | 8  | 130  | 511  | 451 | CIFDIHMPPFIPS | 0 | 0 | 1  | 9   | 82   | 206 |
| CIFDSFLPPFIFC | 0  | 1 | 1  | 28   | 214  | 449 | CLFDSFVPPFIPC | 1 | 0 | 0  | 14  | 259  | 204 |
| CTFDTLFPFILC  | 1  | 1 | 3  | 88   | 699  | 438 | CIFDTFLPFIVC  | 1 | 0 | 4  | 12  | 103  | 201 |
| CVYDLFLPFIFC  | 0  | 0 | 0  | 7    | 445  | 434 | CLFDIFCPFIFC  | 0 | 0 | 1  | 42  | 424  | 201 |
| CVFDSFLPFIMC  | 4  | 0 | 6  | 61   | 444  | 426 | CIFDIHKPFIFC  | 1 | 0 | 2  | 14  | 87   | 200 |
| CIFDLFCPFILC  | 1  | 0 | 1  | 35   | 381  | 425 | CLFDLFFPFIIC  | 4 | 1 | 32 | 275 | 685  | 197 |
| CTFDTHLPPFIYC | 4  | 7 | 70 | 1057 | 2554 | 415 | CCFDSFLPFIFC  | 0 | 1 | 0  | 5   | 274  | 195 |
| CLFDTVPPFIIC  | 1  | 0 | 1  | 28   | 314  | 407 | CIFDSFVPPFIFC | 1 | 0 | 0  | 8   | 113  | 194 |
| CLYDSFLPFILC  | 0  | 0 | 3  | 68   | 666  | 405 | CVFDIFMPFILC  | 1 | 0 | 1  | 26  | 168  | 194 |
| CLFDLFYPPFIIC | 0  | 2 | 49 | 657  | 1511 | 403 | CVFDVFCPPFIIC | 1 | 1 | 0  | 13  | 219  | 194 |
| CLYDSFLPFIFC  | 0  | 1 | 1  | 8    | 429  | 390 | CVFDSELLPFIIC | 0 | 0 | 2  | 17  | 202  | 193 |
| CTFDIFLPPFIIC | 0  | 0 | 0  | 19   | 275  | 387 | CLFDLFCPFILC  | 2 | 1 | 5  | 139 | 351  | 192 |
| CVFDSWLPFVFC  | 1  | 4 | 2  | 52   | 438  | 374 | CIFGIHMPPFIPC | 0 | 1 | 3  | 19  | 104  | 191 |
| CIFDIHMPPFITC | 0  | 1 | 2  | 21   | 215  | 364 | CYFDIFLPPFIFC | 5 | 1 | 58 | 620 | 945  | 191 |
| CILDIHMPPFIFC | 0  | 1 | 0  | 30   | 182  | 360 | CLFDTLFPFIFC  | 0 | 0 | 0  | 9   | 195  | 190 |
| CVFDSWLPFVYC  | 10 | 6 | 58 | 742  | 1923 | 354 | CLFDTVPPFILC  | 1 | 1 | 7  | 92  | 456  | 188 |
| CIFDLFAPFIFC  | 3  | 0 | 2  | 30   | 358  | 353 | CVFDSWLPFIFC  | 0 | 2 | 0  | 1   | 78   | 187 |
| CIFDNWLPFICC  | 0  | 2 | 1  | 42   | 457  | 344 | CIFELFFPFIIC  | 2 | 1 | 70 | 339 | 653  | 181 |
| CIFDIHTPPFIFC | 0  | 1 | 2  | 19   | 165  | 339 | CLFDLYCDFIFC  | 5 | 1 | 45 | 590 | 1053 | 180 |
| CLFDLFCPFIFC  | 0  | 0 | 3  | 34   | 240  | 317 | CISDIHMPPFIFC | 1 | 0 | 0  | 16  | 109  | 175 |
| CVFDSFLPFIYC  | 0  | 1 | 0  | 4    | 171  | 311 | CIFDIRMPPFIFC | 0 | 1 | 0  | 16  | 92   | 173 |
| CLFDSFLPFIFC  | 0  | 0 | 2  | 50   | 547  | 299 | CIFDIHVPPFIFC | 0 | 1 | 0  | 10  | 72   | 168 |
| CTFDTLFPFIFC  | 0  | 0 | 1  | 8    | 339  | 297 | CIFDLFLPFVFC  | 0 | 1 | 4  | 54  | 226  | 168 |
| CLFDIFCPFIIC  | 0  | 0 | 4  | 19   | 218  | 287 | CVFDLFPVFIIC  | 0 | 0 | 2  | 27  | 163  | 164 |
| CIFDIHMPPFIIC | 1  | 0 | 1  | 1    | 123  | 285 | CIFDLFFFPVPC  | 2 | 0 | 37 | 206 | 450  | 163 |
| CLYDSFLPFIYC  | 3  | 1 | 1  | 30   | 516  | 284 | CIFELNLPFIFC  | 2 | 0 | 43 | 387 | 737  | 162 |
| CIFDIFLPPFIFC | 0  | 0 | 1  | 2    | 125  | 276 | CVFDSFLPLIIC  | 0 | 1 | 1  | 11  | 112  | 161 |
| CIYDIHMPPFIFC | 0  | 0 | 1  | 12   | 101  | 276 | CVYDLFLPFIIC  | 0 | 0 | 2  | 1   | 128  | 161 |
| CTFDIFLPPFIFC | 1  | 0 | 1  | 29   | 418  | 275 | CIFDIHIPFIFC  | 0 | 0 | 0  | 10  | 58   | 157 |
| CLFDSFLPFIVC  | 2  | 3 | 69 | 821  | 1456 | 273 | CFFDIHMPPFIFC | 0 | 0 | 1  | 11  | 80   | 157 |
| CLFDTLFPFIYC  | 2  | 0 | 1  | 40   | 286  | 272 | CVYDIFVPPFIMC | 1 | 0 | 1  | 37  | 293  | 154 |
| CIFDTLFPFICC  | 2  | 0 | 1  | 9    | 184  | 257 | CLFDTVPPFIYC  | 0 | 0 | 3  | 23  | 344  | 154 |
| CIFDVHMPPFIFC | 1  | 1 | 1  | 110  | 166  | 257 | CTFDLFLPFICC  | 1 | 0 | 3  | 32  | 242  | 153 |
| CIFDIHMPPFVPC | 0  | 0 | 3  | 22   | 124  | 256 | CIFDTFVPFIFC  | 0 | 0 | 2  | 16  | 93   | 149 |
| CTFDTHFPFIIC  | 0  | 1 | 1  | 10   | 163  | 248 | CIFDLFCPFIFC  | 0 | 0 | 0  | 4   | 151  | 148 |
| CLFDSFVPPFILC | 2  | 2 | 7  | 71   | 434  | 246 | CVFDIFFPVFC   | 1 | 0 | 1  | 20  | 152  | 148 |
| CIFDSFLPFILC  | 3  | 1 | 0  | 8    | 111  | 245 | CVFDVFCPFILC  | 0 | 0 | 5  | 71  | 354  | 148 |
| CLFDIHMPPFIFC | 0  | 0 | 0  | 7    | 91   | 245 | CVYDIFVPPFIYC | 0 | 0 | 0  | 5   | 121  | 147 |
| CVFDLHCPFIFC  | 4  | 1 | 32 | 459  | 1356 | 243 | CNFDIHMPPFIFC | 1 | 0 | 0  | 4   | 57   | 143 |
| CLFDSLLPFIFC  | 7  | 6 | 45 | 510  | 1106 | 242 | CCFDIFLPPFIYC | 1 | 0 | 2  | 9   | 138  | 140 |
| CIFDIHMPSIPC  | 1  | 1 | 1  | 15   | 135  | 241 | CIFDIHMPPFIPY | 0 | 0 | 2  | 9   | 68   | 138 |
| CVFDSFLPFVIC  | 0  | 1 | 2  | 9    | 160  | 236 | CIFDIHMPPFNPC | 0 | 0 | 0  | 12  | 61   | 137 |
| CCFDSFLPFILC  | 1  | 4 | 6  | 70   | 522  | 236 | CFFDLHLFPVFC  | 1 | 1 | 56 | 704 | 591  | 136 |
| CLFDLFCPFIFC  | 1  | 5 | 2  | 68   | 306  | 235 | CTFDLFLPFVFC  | 2 | 0 | 2  | 31  | 126  | 135 |
| CIFDLFVPPFIFC | 0  | 0 | 0  | 4    | 210  | 234 | CVYDIFVPPFIVC | 1 | 0 | 1  | 24  | 197  | 135 |
| CCFDSFLPFIYC  | 1  | 1 | 4  | 34   | 462  | 229 | CIFDIHMPYIPC  | 0 | 0 | 0  | 11  | 59   | 135 |
| CIFDLWLPFTPC  | 0  | 0 | 2  | 19   | 138  | 225 | CVFDNWLPFIFC  | 2 | 0 | 2  | 30  | 226  | 132 |
| CLFDLFVPPFIFC | 0  | 3 | 1  | 12   | 218  | 223 | CIFDSFFFPIIC  | 1 | 0 | 1  | 11  | 115  | 131 |
| CLFDTLFPFILC  | 1  | 2 | 4  | 74   | 343  | 218 | CTFDSFLPFIFC  | 0 | 1 | 2  | 11  | 120  | 130 |
| CLFDSFVPPFIYC | 1  | 1 | 1  | 24   | 367  | 214 | CIFDSWLPFIYC  | 0 | 1 | 1  | 9   | 103  | 129 |
| CIFDSFFPFILC  | 0  | 0 | 3  | 72   | 360  | 211 | CTFDVFLPFIFC  | 0 | 1 | 5  | 33  | 243  | 127 |
| CIFDIHMPPFIHC | 0  | 0 | 2  | 12   | 190  | 210 | CVFDSFLPFITC  | 1 | 0 | 1  | 15  | 167  | 124 |



|               |   |   |    |     |     |    |
|---------------|---|---|----|-----|-----|----|
| CTFDLFLPFTFC  | 0 | 0 | 2  | 54  | 141 | 59 |
| CVFDSWLPFIYC  | 2 | 0 | 0  | 3   | 54  | 59 |
| CIFDTFMPFIFC  | 0 | 0 | 0  | 1   | 16  | 59 |
| CLFDSFVPPFICC | 1 | 0 | 2  | 18  | 113 | 59 |
| CIFDTFSPFIFC  | 0 | 0 | 1  | 10  | 42  | 59 |
| CLYDSLPLPFIFC | 1 | 0 | 27 | 328 | 314 | 58 |
| CLFDIFLPPFICC | 1 | 0 | 1  | 9   | 86  | 57 |
| CIFVIHMPFIFC  | 0 | 0 | 1  | 5   | 28  | 57 |
| CIFDLFLPFIYC  | 0 | 0 | 0  | 0   | 33  | 57 |
| CVFDSFMPFIFC  | 0 | 0 | 0  | 3   | 48  | 56 |
| CTFDLFLPLIFC  | 0 | 0 | 2  | 23  | 96  | 56 |
| CVFDIFMPFIFC  | 0 | 0 | 0  | 2   | 20  | 56 |
| CLFDIFLPPFIMC | 0 | 0 | 6  | 27  | 97  | 55 |
| CLFDIFLPPFVFC | 0 | 0 | 0  | 22  | 53  | 54 |
| CVFDSFMPFIFC  | 0 | 0 | 0  | 2   | 31  | 54 |
| CIFYIHMPFIFC  | 0 | 0 | 0  | 2   | 26  | 53 |
| CIFDTHPPFIFC  | 0 | 0 | 1  | 2   | 19  | 53 |
| CFYDLFLPFIIC  | 1 | 0 | 0  | 2   | 155 | 53 |
| CTFDVFLPFIIC  | 0 | 0 | 0  | 4   | 119 | 53 |
| CLFDLHLPFIIC  | 0 | 0 | 1  | 8   | 91  | 52 |
| CVFDIFMPFIFC  | 0 | 0 | 0  | 1   | 17  | 52 |
| CVFDIFCPFIFC  | 0 | 0 | 0  | 8   | 55  | 52 |
| CIFDIHLPFIFC  | 0 | 0 | 0  | 5   | 32  | 52 |
| CLFDLFPVFPVYC | 1 | 1 | 3  | 36  | 148 | 52 |
| CIFDSFLPFVIC  | 0 | 0 | 0  | 0   | 11  | 52 |
| CLFDSFIPFIFC  | 0 | 0 | 0  | 15  | 44  | 51 |
| CVFDLFPFPTFC  | 0 | 2 | 74 | 441 | 403 | 50 |
| CVFDLFCPPFIFC | 0 | 0 | 0  | 3   | 34  | 50 |
| CTFDIFMPFILC  | 0 | 0 | 0  | 13  | 115 | 50 |
| CCFDSFLPFICC  | 0 | 0 | 0  | 10  | 128 | 50 |
| CTFDSLLPFIFC  | 3 | 2 | 30 | 327 | 485 | 49 |
| CLFDSFLPFIYC  | 0 | 0 | 0  | 1   | 45  | 49 |
| CVFDIFIPFVPC  | 0 | 0 | 4  | 26  | 118 | 49 |
| CTFDNWLPPFIYC | 0 | 1 | 1  | 19  | 134 | 49 |
| CIFDLHMPFIFC  | 0 | 0 | 0  | 1   | 12  | 49 |
| CIFDTHMPFILC  | 0 | 0 | 0  | 2   | 22  | 48 |
| CVYDIFVPPFITC | 0 | 0 | 0  | 16  | 94  | 48 |
| CIFDTSLPFIFC  | 0 | 0 | 0  | 9   | 32  | 47 |
| CLFDIFLPPFIVC | 0 | 0 | 1  | 16  | 68  | 47 |
| CLYDSFLPLIFC  | 1 | 0 | 2  | 14  | 61  | 47 |
| CAFDLFLPFIIC  | 2 | 0 | 0  | 20  | 79  | 47 |
| CFYDLFLPFIIC  | 0 | 0 | 0  | 4   | 126 | 47 |
| CVFDLFLPFIIC  | 0 | 0 | 0  | 5   | 37  | 46 |
| CIFDIFLPPFILC | 0 | 0 | 0  | 5   | 48  | 46 |
| CVFDPFLPFIIC  | 0 | 0 | 0  | 16  | 52  | 46 |
| CIFDSFFSFIFC  | 1 | 1 | 32 | 229 | 301 | 46 |
| CLFDLHEPFIYC  | 0 | 0 | 0  | 1   | 23  | 46 |
| CVFDGFLPFIIC  | 0 | 0 | 0  | 3   | 31  | 46 |
| CIFDVFLPFIIC  | 0 | 0 | 0  | 7   | 42  | 46 |
| CCFDPHFIFIPIC | 0 | 0 | 0  | 2   | 23  | 46 |
| CVFDSFLPFIIS  | 0 | 0 | 0  | 4   | 26  | 45 |
| CVYDIFVPLIIC  | 0 | 1 | 0  | 13  | 66  | 45 |

|               |   |   |    |     |     |    |
|---------------|---|---|----|-----|-----|----|
| CVFDSFVPPFIFC | 0 | 0 | 0  | 3   | 28  | 45 |
| CVFDLFSPPFIFC | 1 | 0 | 2  | 5   | 66  | 45 |
| CLFDSFMPFIFC  | 0 | 0 | 2  | 15  | 71  | 45 |
| CIFDLFSPPFIIC | 0 | 0 | 0  | 0   | 58  | 45 |
| CIFDNWLPLIYC  | 0 | 0 | 0  | 14  | 78  | 44 |
| CVFDSFLPYIIC  | 0 | 0 | 2  | 4   | 37  | 44 |
| CTFDLFLPFIIC  | 0 | 1 | 2  | 12  | 63  | 44 |
| CIFDIFLPPFIIC | 0 | 1 | 0  | 2   | 19  | 44 |
| CIFDIHMPFIFC  | 0 | 0 | 0  | 8   | 52  | 44 |
| CCFDIFLPPFIFC | 0 | 0 | 0  | 1   | 81  | 43 |
| FIFDIHMPFIFC  | 0 | 0 | 0  | 6   | 16  | 43 |
| CCFDPHLPFIFC  | 0 | 0 | 19 | 167 | 247 | 43 |
| CIWDSFVPPFIYC | 2 | 0 | 0  | 4   | 113 | 42 |
| CIFDTFLPFIFC  | 0 | 0 | 1  | 10  | 34  | 42 |
| CCFDLFPFIFC   | 1 | 2 | 45 | 237 | 250 | 42 |
| CIFDTFLPFVIC  | 0 | 0 | 0  | 0   | 9   | 41 |
| CLFDLFPFVIC   | 0 | 0 | 0  | 7   | 63  | 41 |
| CILDFTLPPFIFC | 0 | 0 | 1  | 10  | 46  | 40 |
| CIFDTFMPFILC  | 0 | 0 | 0  | 3   | 57  | 40 |
| CTFDLFPFVLC   | 3 | 0 | 74 | 662 | 635 | 40 |
| CIYDSFLPFIFC  | 0 | 0 | 0  | 0   | 53  | 40 |
| CVFDRFLPFIIC  | 0 | 0 | 0  | 2   | 17  | 40 |
| CDYDIFVPPFIIC | 0 | 0 | 0  | 4   | 43  | 39 |
| CVFDIFLPPFIIC | 0 | 1 | 0  | 0   | 16  | 39 |
| CTFDSWLPYILC  | 0 | 0 | 36 | 358 | 388 | 38 |
| CLFDLFPFIFC   | 1 | 0 | 0  | 11  | 76  | 38 |
| CAYDIFVPPFIIC | 0 | 0 | 0  | 12  | 42  | 37 |
| CIFDLFLPFIIC  | 0 | 0 | 0  | 3   | 14  | 37 |
| CIFDVFCPPFIFC | 0 | 0 | 1  | 10  | 48  | 37 |
| CTFDPPFLPFIFC | 0 | 0 | 2  | 45  | 82  | 37 |
| CVFDNWLPPFIFC | 0 | 0 | 0  | 2   | 28  | 37 |
| CIYDTFLPFIFC  | 0 | 0 | 0  | 7   | 20  | 37 |
| CLFDPSLPFIFC  | 0 | 0 | 0  | 8   | 45  | 36 |
| CCFDLFCPPFIYC | 0 | 2 | 31 | 231 | 287 | 36 |
| CLFDIFCDFIFC  | 0 | 0 | 0  | 9   | 27  | 36 |
| CTWDSFVPPFIFC | 0 | 0 | 1  | 4   | 25  | 36 |
| CTFDLMPFIFC   | 1 | 0 | 0  | 3   | 34  | 36 |
| CTFDLLLPFIFC  | 0 | 0 | 3  | 21  | 58  | 36 |
| FDTFLPFIIC    | 0 | 1 | 0  | 7   | 42  | 35 |
| CIFDTFLPSIFC  | 0 | 0 | 0  | 4   | 43  | 35 |
| CIWDSFVPPFIVC | 0 | 0 | 0  | 7   | 92  | 35 |
| CTFDVFLPFILC  | 0 | 0 | 4  | 42  | 158 | 35 |
| CVFDLFPYIIC   | 0 | 0 | 0  | 32  | 70  | 35 |
| CVFDSFLPFIFC  | 0 | 0 | 0  | 3   | 53  | 35 |
| CLFDTFIPFIFC  | 0 | 0 | 1  | 18  | 39  | 35 |
| CTFDSWLPYIIC  | 0 | 0 | 2  | 14  | 93  | 34 |
| CIFDTHPPFIIC  | 0 | 0 | 0  | 1   | 6   | 34 |
| CCFDLFLPFIIC  | 0 | 0 | 2  | 13  | 73  | 34 |
| CIFDLFSPPFIYC | 0 | 0 | 1  | 5   | 73  | 34 |
| CVFDSFFPFIIC  | 0 | 0 | 1  | 14  | 64  | 34 |
| CLFDLHLPFILC  | 0 | 1 | 5  | 20  | 117 | 34 |
| CVFDSFLTFIIC  | 1 | 0 | 0  | 2   | 18  | 34 |

|               |   |   |    |     |     |    |
|---------------|---|---|----|-----|-----|----|
| CVFDSFLPFIIY  | 0 | 0 | 1  | 0   | 31  | 34 |
| CVFDIFPFIPC   | 0 | 0 | 0  | 0   | 69  | 34 |
| CIFDIHMPFFPC  | 0 | 0 | 0  | 9   | 15  | 33 |
| CFFDLFFPFYPC  | 3 | 4 | 45 | 735 | 382 | 33 |
| CIFDSFLPFVLC  | 0 | 1 | 0  | 3   | 31  | 33 |
| CLFDIFFPFILC  | 0 | 0 | 31 | 305 | 206 | 33 |
| CVFDIFVPFIIIC | 0 | 0 | 0  | 1   | 13  | 33 |
| CVFDSYLPFIIC  | 0 | 0 | 0  | 1   | 31  | 33 |
| CLFDTFVVPFICC | 0 | 0 | 1  | 15  | 101 | 32 |
| CIFDIHMPFIVC  | 0 | 0 | 0  | 0   | 15  | 32 |
| CIFDLFAPFIPC  | 0 | 0 | 1  | 2   | 64  | 32 |
| CIFDLFLPFVPC  | 0 | 1 | 5  | 103 | 126 | 32 |
| CLFDSFVPFVYC  | 0 | 0 | 5  | 20  | 171 | 32 |
| CTFDLFLPSIFC  | 0 | 0 | 0  | 20  | 49  | 32 |
| CIFDSFCPFIVC  | 0 | 0 | 1  | 23  | 93  | 32 |
| CTFDLFLPLIFC  | 0 | 0 | 0  | 11  | 48  | 32 |
| CVYDIFLPPFIFC | 0 | 0 | 0  | 2   | 29  | 32 |
| CLFDIFCPFIYC  | 0 | 0 | 0  | 1   | 15  | 31 |
| CIFDSFMPFIFC  | 0 | 0 | 0  | 0   | 14  | 31 |
| CFFDSFMPFIFC  | 2 | 0 | 28 | 146 | 241 | 31 |
| CIFDAFLPFIFC  | 1 | 0 | 0  | 4   | 38  | 31 |
| CIFDLFLPFIIIC | 0 | 0 | 0  | 0   | 9   | 31 |
| CIFDLFVPFIVC  | 0 | 0 | 0  | 3   | 40  | 31 |
| CIFDNWLPFVYC  | 0 | 0 | 1  | 5   | 60  | 31 |
| CHYDSFLPFIFC  | 0 | 0 | 0  | 7   | 23  | 31 |
| CTLDLFLPFIFC  | 0 | 0 | 2  | 23  | 54  | 31 |
| CTSDFLPPFIFC  | 0 | 0 | 0  | 17  | 40  | 31 |
| CVFDLFLPLIFC  | 0 | 0 | 0  | 11  | 34  | 31 |
| CVFNSFLPFIIIC | 0 | 0 | 0  | 4   | 18  | 31 |
| CVYDIFVPFIFC  | 0 | 0 | 0  | 7   | 53  | 31 |
| RVFDSFLPFIIIC | 0 | 0 | 0  | 0   | 15  | 31 |
| CLFDSFVPFVLC  | 1 | 0 | 7  | 33  | 171 | 31 |
| CIFDSFIPFIFC  | 0 | 0 | 0  | 1   | 22  | 30 |
| CIFDIFMPFIVC  | 0 | 0 | 0  | 5   | 18  | 30 |
| CIFDTLPPFIY   | 0 | 0 | 0  | 3   | 16  | 30 |
| CVFDSWLPFVLC  | 2 | 0 | 0  | 1   | 42  | 30 |
| CLFDSLLPFIIIC | 0 | 0 | 0  | 2   | 31  | 30 |
| CLFDLFCPFICC  | 0 | 0 | 1  | 12  | 94  | 30 |
| CFFDTLPPFIFC  | 0 | 0 | 0  | 4   | 23  | 29 |
| CLFDIFVPPFIFC | 0 | 0 | 0  | 3   | 19  | 29 |
| CLFDSFVPFIVC  | 0 | 0 | 0  | 13  | 91  | 29 |
| CLFDSFVPLIFC  | 0 | 0 | 1  | 28  | 47  | 29 |
| CTFDLFSPPFIFC | 0 | 0 | 0  | 14  | 54  | 29 |
| CVFDSFLPFTFC  | 0 | 0 | 0  | 0   | 9   | 29 |
| CVFDSLLPFIFC  | 0 | 0 | 0  | 2   | 58  | 29 |
| CVYDIFMPFIIIC | 0 | 0 | 0  | 4   | 25  | 29 |
| CYFDPHFILIPC  | 0 | 0 | 1  | 14  | 26  | 29 |
| CLFDLFPFVLC   | 0 | 0 | 4  | 33  | 146 | 28 |
| CIFDLFLPFILC  | 0 | 1 | 0  | 3   | 21  | 28 |
| CIFDSHMPFIFC  | 0 | 0 | 0  | 2   | 18  | 28 |
| CLFDLFFPFILC  | 1 | 0 | 2  | 34  | 67  | 28 |
| CIFDIFVPFIIIC | 1 | 0 | 1  | 0   | 5   | 28 |

|               |   |   |    |     |     |    |
|---------------|---|---|----|-----|-----|----|
| CVFDTFPFILC   | 0 | 0 | 1  | 4   | 20  | 28 |
| CVYDSFLPFIIYC | 0 | 0 | 0  | 16  | 68  | 28 |
| CLYDSFMPFIFC  | 0 | 0 | 0  | 4   | 19  | 28 |
| CVFDSILPFIIIC | 0 | 0 | 0  | 4   | 14  | 28 |
| CLFDLFLPFIIIC | 0 | 0 | 3  | 42  | 71  | 27 |
| CIFDLFSPFIFC  | 0 | 1 | 0  | 3   | 33  | 27 |
| CLFDLFYVPFIPC | 0 | 0 | 1  | 17  | 48  | 27 |
| CTFDLFLPFVFC  | 0 | 0 | 0  | 7   | 68  | 27 |
| CTFDLHLPFIIC  | 0 | 0 | 0  | 0   | 29  | 27 |
| CVYDILVPFIIIC | 0 | 0 | 0  | 11  | 39  | 27 |
| CYFDIHMPFIFC  | 0 | 0 | 0  | 0   | 8   | 27 |
| CLYDSFLPFTFC  | 0 | 0 | 0  | 11  | 74  | 27 |
| CLYDSFVPFIFC  | 0 | 0 | 0  | 7   | 29  | 26 |
| CIFDIFVPPFIFC | 0 | 0 | 0  | 0   | 8   | 26 |
| CIFDIHMPFIQC  | 0 | 0 | 0  | 1   | 10  | 26 |
| CIFDIWLPFIIYC | 0 | 0 | 0  | 4   | 28  | 26 |
| CLYDSFLPSIFC  | 0 | 0 | 1  | 7   | 14  | 26 |
| CVYDLLLPFIYC  | 0 | 0 | 2  | 12  | 39  | 26 |
| CTFDLSLPPFIFC | 0 | 1 | 0  | 18  | 56  | 26 |
| CVFDSFLPFNIC  | 0 | 0 | 1  | 5   | 18  | 26 |
| CVFDSFVPFIIIC | 0 | 0 | 0  | 1   | 14  | 26 |
| CVYGFVPPFIIIC | 0 | 1 | 1  | 3   | 27  | 26 |
| CYFDPHFIFTPC  | 0 | 1 | 1  | 28  | 64  | 26 |
| CLYDSFSPFIFC  | 0 | 0 | 0  | 11  | 44  | 26 |
| CLFDLFLPYVFC  | 1 | 0 | 35 | 436 | 401 | 25 |
| CDFDLFLPPFIFC | 0 | 0 | 0  | 7   | 21  | 25 |
| CIFDIFLPPFIYC | 1 | 0 | 0  | 0   | 5   | 25 |
| CIFDNWPPFIYC  | 0 | 0 | 1  | 8   | 45  | 25 |
| CIFGTFLPPFIFC | 0 | 0 | 0  | 3   | 18  | 25 |
| CLFDIFLPPFTFC | 0 | 0 | 1  | 22  | 47  | 25 |
| CLFDLFYPPFIFC | 0 | 0 | 0  | 19  | 149 | 25 |
| CTFDLTHFPFILC | 0 | 0 | 0  | 1   | 25  | 25 |
| CVFDSFLSFIIC  | 0 | 0 | 0  | 2   | 17  | 25 |
| CVYDLFLPLIYC  | 0 | 1 | 0  | 15  | 41  | 25 |
| CPYDSFLPFIFC  | 0 | 1 | 1  | 14  | 42  | 25 |
| CIFDTYLPFIFC  | 0 | 0 | 0  | 3   | 19  | 24 |
| CIFDIFLPPFIFC | 1 | 0 | 0  | 0   | 9   | 24 |
| CIFDIFMPFIFC  | 0 | 0 | 0  | 0   | 9   | 24 |
| CIFDSFFFPIYC  | 1 | 1 | 0  | 4   | 85  | 24 |
| CLFDIFLPPFIFC | 0 | 0 | 1  | 15  | 30  | 24 |
| CLYDLFLPFIIYC | 0 | 0 | 0  | 4   | 27  | 24 |
| CVFDLMPFIFC   | 0 | 0 | 0  | 1   | 25  | 24 |
| CVLDLFLPFIFC  | 0 | 1 | 0  | 5   | 32  | 24 |
| CVYDIFVPPFTIC | 0 | 0 | 0  | 9   | 31  | 24 |
| CVYDIFVPPFIVC | 0 | 0 | 0  | 8   | 44  | 24 |
| CVYDLFLPFTYC  | 0 | 0 | 2  | 17  | 65  | 24 |
| CISDTLPPFIFC  | 0 | 0 | 0  | 4   | 37  | 23 |
| CAYDLFLPFIIYC | 0 | 0 | 0  | 6   | 20  | 23 |
| CLLDSFVPFIFC  | 0 | 0 | 0  | 22  | 44  | 23 |
| CIFDIFMPFTPC  | 0 | 0 | 0  | 2   | 20  | 23 |
| CFYDSFLPPFIFC | 0 | 0 | 1  | 7   | 35  | 23 |
| CIFDINMPFITC  | 0 | 0 | 0  | 1   | 7   | 23 |

|               |   |   |    |     |     |    |               |   |   |    |     |     |    |
|---------------|---|---|----|-----|-----|----|---------------|---|---|----|-----|-----|----|
| CVFDLFLPFTIC  | 1 | 0 | 0  | 4   | 37  | 23 | CIFDTLHFIFC   | 0 | 0 | 0  | 0   | 13  | 20 |
| CVFDLWLPFYFC  | 0 | 2 | 16 | 189 | 231 | 23 | CLFDLFLPFIMC  | 1 | 0 | 61 | 537 | 266 | 20 |
| CTFDLFCPFIVC  | 0 | 0 | 3  | 14  | 62  | 23 | CLHDSFLPFIFC  | 0 | 0 | 0  | 5   | 20  | 20 |
| CVFDSFLPSILC  | 0 | 0 | 1  | 3   | 14  | 23 | CLYDSYLPFIFC  | 0 | 0 | 0  | 2   | 18  | 20 |
| CVFDTLFPFIYC  | 0 | 0 | 0  | 1   | 10  | 23 | CFFDIFLPFIFC  | 0 | 0 | 0  | 0   | 25  | 20 |
| CVFDSFLPLILC  | 0 | 1 | 0  | 5   | 30  | 23 | CIFDPFVPFIFC  | 1 | 0 | 3  | 7   | 51  | 20 |
| CVFDIHMPPFICL | 0 | 1 | 0  | 2   | 31  | 23 | CVYDIFEPFIIC  | 0 | 0 | 0  | 2   | 26  | 20 |
| CIFDVFCDFIFC  | 0 | 0 | 0  | 13  | 31  | 22 | CTFDSWLPYIFC  | 0 | 0 | 2  | 16  | 72  | 20 |
| CLFDLFPVFC    | 0 | 0 | 0  | 10  | 61  | 22 | CVFDSFLHFIIC  | 0 | 0 | 0  | 3   | 17  | 20 |
| CLFDIFSPFIFC  | 0 | 0 | 1  | 14  | 46  | 22 | CTFDTFPPFIFC  | 0 | 0 | 4  | 8   | 25  | 20 |
| CLFDIFLFPFITC | 0 | 0 | 1  | 4   | 34  | 22 | CVFDIFMPFIIC  | 0 | 0 | 0  | 0   | 4   | 20 |
| CIWDSFLPFIFC  | 0 | 0 | 0  | 0   | 15  | 22 | CVFDLFLPFTLC  | 1 | 0 | 2  | 17  | 80  | 20 |
| CFYDLFLPFILC  | 0 | 2 | 0  | 18  | 164 | 22 | CVWDSFVPFILC  | 0 | 0 | 1  | 13  | 79  | 20 |
| CIFDTLFPVFLC  | 0 | 0 | 1  | 2   | 24  | 22 | CTWDSFVPFILC  | 0 | 0 | 1  | 11  | 51  | 20 |
| CIFDLWLPIAC   | 0 | 0 | 1  | 4   | 10  | 22 | CTFDTHLPFIPC  | 0 | 0 | 0  | 5   | 87  | 20 |
| CLFDLFPVFC    | 0 | 0 | 0  | 5   | 28  | 22 | CVFDLFFPFIPC  | 0 | 0 | 0  | 11  | 38  | 20 |
| CLFDSFLPFVFC  | 1 | 0 | 2  | 19  | 24  | 22 | CVFDLFPFIIC   | 0 | 0 | 0  | 0   | 10  | 20 |
| CLYDSFLPFISC  | 0 | 0 | 2  | 12  | 50  | 22 | CVFDSFSPFIFC  | 0 | 0 | 0  | 0   | 10  | 20 |
| CVFDLHCPFIYC  | 0 | 0 | 1  | 11  | 71  | 22 | CVFESFLPFIC   | 0 | 0 | 0  | 2   | 21  | 20 |
| YFDLFLPFIFC   | 0 | 0 | 0  | 1   | 7   | 22 | CTFDLFLPFISC  | 0 | 0 | 1  | 16  | 37  | 20 |
| CLYDNLLPFILC  | 2 | 0 | 36 | 159 | 231 | 22 | CVFDSFLLFIIC  | 0 | 0 | 0  | 0   | 21  | 20 |
| CVWDSFVPFIFC  | 0 | 0 | 0  | 2   | 30  | 22 | CAFDTLFPFIFC  | 0 | 0 | 1  | 7   | 48  | 19 |
| CVFDSFPPFIIC  | 0 | 0 | 0  | 0   | 12  | 22 | CIFDLFVPLIFC  | 0 | 0 | 0  | 5   | 21  | 19 |
| SVFDSFLPFIC   | 0 | 0 | 0  | 0   | 13  | 22 | CILDNLWLPFIYC | 1 | 0 | 1  | 19  | 36  | 19 |
| CVFDLHCPFIIC  | 0 | 0 | 0  | 5   | 48  | 22 | CIFDSFPPFIVC  | 0 | 0 | 0  | 4   | 41  | 19 |
| CVFDLFLPFTCC  | 0 | 0 | 0  | 4   | 55  | 22 | CIFGNWLPFIYC  | 0 | 0 | 1  | 6   | 29  | 19 |
| CTFDSFLPFIC   | 0 | 0 | 0  | 0   | 9   | 22 | CLFDIFLPLIFC  | 1 | 0 | 0  | 18  | 27  | 19 |
| CTFDIFMPFIPC  | 0 | 0 | 0  | 1   | 10  | 22 | CLFDIFMPFIFC  | 0 | 0 | 0  | 7   | 16  | 19 |
| CSFDIHMPPFIPC | 0 | 0 | 0  | 3   | 9   | 21 | CIFDLFYPFIVC  | 0 | 0 | 0  | 2   | 22  | 19 |
| CCFDLFFPFIVC  | 0 | 1 | 12 | 108 | 122 | 21 | CLFDIFVPPFIIC | 0 | 0 | 0  | 0   | 9   | 19 |
| CIFDIFMPLILC  | 1 | 0 | 0  | 10  | 37  | 21 | CVLDSFLPFIFC  | 0 | 0 | 0  | 0   | 9   | 19 |
| CIFDMHMPFIPC  | 0 | 0 | 0  | 5   | 15  | 21 | CLFDLHMPPFIPC | 0 | 0 | 0  | 1   | 6   | 19 |
| CIFDTLFPFIFS  | 0 | 0 | 0  | 0   | 18  | 21 | CVFDIFIPFIIC  | 0 | 0 | 0  | 0   | 10  | 19 |
| CLFDLFCPFIVC  | 0 | 0 | 1  | 18  | 42  | 21 | CVFDSWLPFIIC  | 0 | 0 | 0  | 0   | 5   | 19 |
| CLFDLFPFIVC   | 0 | 0 | 0  | 7   | 33  | 21 | CPFDTLFPFIFC  | 0 | 0 | 0  | 10  | 18  | 19 |
| CVFDVFCPFICC  | 0 | 0 | 0  | 6   | 82  | 21 | CTFDVFLPFICC  | 0 | 0 | 3  | 7   | 45  | 19 |
| CVFDLSLPFIFC  | 0 | 0 | 0  | 8   | 17  | 21 | CLFDTFPPFIFC  | 0 | 0 | 0  | 9   | 19  | 19 |
| CTFDLFPFIVC   | 0 | 0 | 0  | 4   | 45  | 21 | CVFDIFCPFILC  | 0 | 0 | 0  | 1   | 12  | 19 |
| YVFDLFPFIIC   | 0 | 0 | 0  | 0   | 5   | 21 | CVFDSFPPFIPC  | 0 | 0 | 3  | 29  | 58  | 19 |
| CVFDSFMPFIPC  | 0 | 0 | 0  | 0   | 11  | 21 | CVFDSFLPFIRC  | 0 | 1 | 0  | 4   | 12  | 19 |
| CVFDTFVPPFIC  | 0 | 0 | 0  | 0   | 21  | 21 | CVFDSWLPVFC   | 0 | 1 | 2  | 19  | 66  | 19 |
| CVFDSLLPFILC  | 1 | 0 | 2  | 16  | 82  | 21 | CLYDPFLPFIFC  | 0 | 0 | 1  | 15  | 41  | 19 |
| CVYDIFLPFIIC  | 0 | 0 | 0  | 3   | 17  | 21 | CIFHIHMPPFIPC | 0 | 0 | 0  | 1   | 5   | 18 |
| CVYDLFLPSIYC  | 0 | 0 | 0  | 5   | 32  | 21 | CIFDTFVPFIIC  | 0 | 0 | 0  | 0   | 10  | 18 |
| CVLDSFLPFILC  | 0 | 1 | 0  | 8   | 21  | 21 | CLFDPPVPPFIFC | 0 | 0 | 0  | 27  | 38  | 18 |
| CCFDIHMPPFIPC | 0 | 0 | 0  | 1   | 11  | 20 | CIFDTLTFIFC   | 0 | 0 | 0  | 0   | 9   | 18 |
| CIFDNRLPFIYC  | 0 | 0 | 0  | 14  | 59  | 20 | CIFDTFFFPIPC  | 0 | 1 | 0  | 4   | 18  | 18 |
| CTFDIFMPFIFC  | 0 | 0 | 0  | 1   | 11  | 20 | CCLDSFLPFIFC  | 0 | 0 | 0  | 10  | 45  | 18 |
| CIFDIHMPPFINC | 0 | 0 | 0  | 1   | 8   | 20 | CFFDLDLPFVFC  | 1 | 1 | 34 | 426 | 341 | 18 |
| CIFDLFSPFILC  | 0 | 0 | 1  | 13  | 65  | 20 | CCFDSFLPLIFC  | 0 | 0 | 0  | 9   | 34  | 18 |
| CLFDPPCFPFIFC | 0 | 0 | 1  | 68  | 56  | 20 | CLFDIFLPFVIC  | 0 | 0 | 0  | 5   | 23  | 18 |
| CIFDSFPPFVIC  | 0 | 0 | 0  | 10  | 31  | 20 | CIFDLFCPLIVC  | 0 | 0 | 0  | 9   | 36  | 18 |

|               |   |   |   |    |    |    |               |   |   |    |     |     |    |
|---------------|---|---|---|----|----|----|---------------|---|---|----|-----|-----|----|
| CVYDISVPIIC   | 0 | 0 | 0 | 6  | 24 | 18 | CVFDTFLPFIPC  | 0 | 0 | 0  | 0   | 6   | 16 |
| CDFDSLPPFILC  | 0 | 0 | 0 | 3  | 13 | 18 | CTFDLFLPFNFC  | 0 | 0 | 0  | 2   | 7   | 16 |
| CVVDSLPPFIIC  | 0 | 0 | 0 | 0  | 12 | 18 | CTFDLYLPFIFC  | 0 | 0 | 0  | 8   | 22  | 16 |
| CNFDTFLPFIFC  | 0 | 0 | 0 | 0  | 11 | 18 | CTFDTHFPFIFC  | 0 | 0 | 0  | 2   | 29  | 16 |
| CVYDVVFPFIIC  | 0 | 0 | 0 | 4  | 19 | 18 | CTFDLLPFIFC   | 0 | 0 | 2  | 14  | 39  | 16 |
| CVYDIFAPFIIC  | 0 | 0 | 0 | 9  | 41 | 18 | CLYGSFLPFIFC  | 0 | 0 | 1  | 5   | 23  | 16 |
| CLYDSSLPFIFC  | 0 | 0 | 1 | 10 | 31 | 18 | CTSDTFLPFIFC  | 0 | 0 | 0  | 4   | 13  | 16 |
| CVIDSFLPFIIIC | 0 | 0 | 0 | 2  | 14 | 18 | CVFDVFCPFIVC  | 0 | 0 | 0  | 9   | 45  | 16 |
| CVFDSWLPFILC  | 0 | 0 | 0 | 0  | 9  | 18 | CVFYSFLPFIIIC | 0 | 0 | 0  | 1   | 9   | 16 |
| CSFDLFLPFIFC  | 0 | 0 | 0 | 9  | 30 | 18 | RIFDTFLPFIFC  | 0 | 0 | 0  | 3   | 8   | 16 |
| CIFDIFIPFILC  | 0 | 0 | 0 | 5  | 24 | 17 | CYFDPHFTFIPC  | 0 | 0 | 0  | 13  | 41  | 16 |
| CFYDLFLPFICC  | 0 | 0 | 0 | 2  | 67 | 17 | CRFDSFLPFIFC  | 0 | 0 | 0  | 3   | 16  | 16 |
| CLFDLFCPFVFC  | 0 | 0 | 0 | 12 | 24 | 17 | CIFDILMPFILC  | 0 | 0 | 0  | 5   | 15  | 15 |
| CIFDTFLPFITC  | 0 | 0 | 0 | 0  | 6  | 17 | CIFDIFMPFICC  | 0 | 0 | 0  | 0   | 5   | 15 |
| CIFDIFIPFVLC  | 0 | 0 | 0 | 0  | 42 | 17 | CIFDIHRPFIPC  | 0 | 0 | 0  | 1   | 8   | 15 |
| CIFDINMPFIHC  | 0 | 0 | 0 | 1  | 1  | 17 | CIFDTFLPYIFC  | 0 | 0 | 0  | 1   | 22  | 15 |
| CIFDLFVPFTFC  | 0 | 0 | 0 | 5  | 36 | 17 | CIFDLFLPFVYC  | 1 | 0 | 0  | 7   | 18  | 15 |
| CIFDNWLPSIYC  | 0 | 0 | 0 | 10 | 37 | 17 | CIFDLLVPFIFC  | 0 | 0 | 0  | 4   | 29  | 15 |
| CLFDLVFPFIIC  | 0 | 0 | 0 | 1  | 17 | 17 | CIFDTFVPFILC  | 0 | 0 | 0  | 1   | 11  | 15 |
| CIVDIHKPFIPC  | 0 | 0 | 0 | 1  | 6  | 17 | CIFDSFCPFIFC  | 0 | 0 | 0  | 1   | 9   | 15 |
| CLFDSFLPLIFC  | 0 | 0 | 0 | 1  | 3  | 17 | CIFDNWLPFVFC  | 1 | 0 | 0  | 0   | 12  | 15 |
| CCFDPFLPFIFC  | 0 | 0 | 3 | 11 | 27 | 17 | CTFNLFLPFIFC  | 0 | 1 | 0  | 3   | 13  | 15 |
| CLYDNLLPFIIIC | 0 | 0 | 2 | 10 | 29 | 17 | CLFDLFFPFIFC  | 0 | 0 | 1  | 8   | 58  | 15 |
| CVFVSFLPFIIIC | 0 | 0 | 0 | 5  | 19 | 17 | CPFDTFVFPFIFC | 0 | 0 | 2  | 6   | 29  | 15 |
| FDIHMPPFIPC   | 0 | 0 | 0 | 1  | 9  | 17 | CVFDSFLPFVPC  | 1 | 0 | 0  | 15  | 37  | 15 |
| CTFGLFLPFIFC  | 0 | 0 | 0 | 14 | 32 | 17 | CVFDSSLPFILC  | 0 | 0 | 0  | 2   | 13  | 15 |
| CTFGTFLPFIFC  | 0 | 0 | 0 | 7  | 23 | 17 | CVFDCFLPFIIIC | 0 | 0 | 0  | 2   | 15  | 15 |
| CTYDLFLPFIFC  | 0 | 0 | 0 | 6  | 21 | 17 | CVFDIHMPPFTPC | 1 | 0 | 0  | 1   | 13  | 15 |
| CVFDLFLPFISC  | 0 | 0 | 1 | 11 | 27 | 17 | CVFDLLLPFIFC  | 0 | 0 | 1  | 7   | 16  | 15 |
| CVFDLHCPFIPC  | 0 | 0 | 0 | 2  | 26 | 17 | CVFDNFLPFIFC  | 1 | 0 | 0  | 0   | 5   | 15 |
| CVFDSFLPIIIC  | 0 | 0 | 0 | 4  | 17 | 17 | CVFDSFLPFIFY  | 0 | 0 | 0  | 0   | 4   | 15 |
| CVFDSFMPFILC  | 0 | 0 | 0 | 1  | 15 | 17 | CVFDLFAPIIYC  | 0 | 1 | 0  | 11  | 51  | 15 |
| CVFDSLLPFIYC  | 0 | 0 | 1 | 7  | 75 | 17 | CYFDPHFIFITC  | 0 | 0 | 0  | 8   | 24  | 15 |
| CLFDTFVPLIFC  | 0 | 0 | 1 | 24 | 28 | 17 | CVHDIIVPFIIC  | 0 | 0 | 0  | 3   | 20  | 15 |
| CVYDLSLPIIYC  | 0 | 0 | 0 | 9  | 28 | 17 | CVYDIFVPFICC  | 0 | 0 | 0  | 0   | 22  | 15 |
| CVFDSFLPLIFC  | 0 | 0 | 0 | 0  | 6  | 17 | CVYDIFVPSIIC  | 0 | 0 | 0  | 4   | 38  | 15 |
| CIFDSFIPFILC  | 0 | 0 | 0 | 2  | 11 | 16 | CYFDPHLIFIPC  | 0 | 0 | 2  | 8   | 17  | 15 |
| CLFDTFYSFIPC  | 0 | 0 | 0 | 7  | 29 | 16 | CYSDPHFIFIPC  | 1 | 0 | 0  | 4   | 13  | 15 |
| CCFDSLLPFIFC  | 0 | 0 | 0 | 13 | 20 | 16 | CLFDILLPFIFC  | 0 | 0 | 0  | 14  | 18  | 14 |
| CCFDLHLPFIFC  | 0 | 0 | 1 | 4  | 33 | 16 | CCFDIFLPFICC  | 0 | 0 | 0  | 1   | 36  | 14 |
| CIFDIHMRFIPC  | 0 | 0 | 0 | 0  | 2  | 16 | CEYDLFLPFIYC  | 0 | 0 | 1  | 11  | 36  | 14 |
| CAFDSFLPFIFC  | 0 | 0 | 0 | 1  | 5  | 16 | CCFDLSLPFVFC  | 0 | 1 | 26 | 209 | 150 | 14 |
| CLFDIFLPLIIC  | 0 | 0 | 2 | 12 | 32 | 16 | CICDIHMPPFIPC | 0 | 0 | 0  | 1   | 5   | 14 |
| CIFNTFLPFIFC  | 0 | 0 | 0 | 0  | 8  | 16 | CIFDIHMPPFSPC | 0 | 0 | 0  | 1   | 7   | 14 |
| CIWDSFVPFICC  | 0 | 0 | 1 | 0  | 29 | 16 | CIFDINMPFINC  | 0 | 0 | 0  | 1   | 2   | 14 |
| CLFDLLCPFIFC  | 0 | 1 | 0 | 22 | 24 | 16 | CIFDLFCPFTVC  | 0 | 0 | 0  | 13  | 22  | 14 |
| CLFDSFVPFTFC  | 0 | 1 | 0 | 11 | 45 | 16 | CLFDILLPFIIIC | 0 | 0 | 0  | 5   | 21  | 14 |
| CLFDLVPFIFC   | 0 | 0 | 0 | 15 | 27 | 16 | CIFDNWLPFISC  | 1 | 0 | 0  | 6   | 10  | 14 |
| CIFDSFLPFIYC  | 0 | 0 | 0 | 0  | 7  | 16 | CIFDNWLPLIFC  | 0 | 0 | 0  | 0   | 10  | 14 |
| CLYDSFLPFVFC  | 0 | 0 | 0 | 7  | 48 | 16 | CIFDSFLPFVYC  | 0 | 0 | 0  | 2   | 17  | 14 |
| CIFDNWLPFIIHC | 0 | 0 | 1 | 7  | 38 | 16 | CILDLFVFPFIFC | 1 | 0 | 0  | 8   | 20  | 14 |
| CCFDSFLPFIVC  | 0 | 0 | 0 | 5  | 43 | 16 | CTFDLFLTIFIC  | 0 | 0 | 0  | 4   | 9   | 14 |

|               |   |   |   |    |    |    |
|---------------|---|---|---|----|----|----|
| CLFDLLPFIFC   | 0 | 0 | 0 | 15 | 28 | 14 |
| CTFDLFLSFIFC  | 0 | 0 | 0 | 4  | 16 | 14 |
| CLFDVFCDFIYC  | 0 | 0 | 1 | 14 | 85 | 14 |
| CPFDSFVPFIFC  | 2 | 0 | 2 | 17 | 30 | 14 |
| CLLDIFLPPFIFC | 0 | 0 | 1 | 14 | 18 | 14 |
| CPFDFLPPFIFC  | 0 | 0 | 0 | 13 | 22 | 14 |
| CTFDLFVPIIIC  | 0 | 0 | 0 | 0  | 3  | 14 |
| CVFDPFLPFILC  | 0 | 0 | 0 | 10 | 24 | 14 |
| CTFDNWLPFIFC  | 0 | 0 | 0 | 1  | 9  | 14 |
| CVSDLFLPFIFC  | 0 | 0 | 1 | 8  | 17 | 14 |
| CLFDLFVPIIIC  | 0 | 0 | 0 | 1  | 23 | 14 |
| CVYDSFLPFILC  | 0 | 0 | 0 | 0  | 12 | 14 |
| CTLDLFLPFIFC  | 0 | 0 | 1 | 9  | 41 | 14 |
| CTFDTHMPFIFC  | 0 | 0 | 0 | 0  | 6  | 14 |
| CLFDSFAPFIFC  | 0 | 0 | 0 | 24 | 24 | 13 |
| CCFDSFLPFVFC  | 0 | 0 | 0 | 8  | 60 | 13 |
| CIFDIFMPFITC  | 0 | 0 | 0 | 0  | 9  | 13 |
| CIFDIFMPFVLC  | 0 | 0 | 0 | 9  | 27 | 13 |
| CIFDIPTPFILC  | 0 | 0 | 0 | 4  | 30 | 13 |
| CIFDIHMAFIPC  | 0 | 0 | 0 | 1  | 8  | 13 |
| CIFDIHMPPIFG  | 0 | 0 | 0 | 1  | 2  | 13 |
| CIFDTHFPFIFC  | 0 | 0 | 0 | 0  | 3  | 13 |
| CIFDLFAPFICC  | 0 | 0 | 0 | 4  | 42 | 13 |
| CIIDTFLPFIFC  | 0 | 0 | 2 | 2  | 17 | 13 |
| CLFDLFRPFIFC  | 0 | 0 | 0 | 18 | 10 | 13 |
| CIFDLFEPFIYC  | 0 | 0 | 0 | 1  | 8  | 13 |
| CLFDISLPPFIFC | 0 | 0 | 2 | 7  | 14 | 13 |
| CLFDIFFPFIPC  | 0 | 0 | 4 | 24 | 37 | 13 |
| CIVDIHMPFITC  | 0 | 0 | 0 | 0  | 4  | 13 |
| CLFDSLLPFILC  | 0 | 0 | 2 | 23 | 75 | 13 |
| CIFDTFLPLILC  | 0 | 0 | 0 | 0  | 7  | 13 |
| CIFDSFYPFIFC  | 0 | 0 | 0 | 1  | 21 | 13 |
| CIFDNWLPFIYS  | 0 | 0 | 0 | 2  | 19 | 13 |
| CIFDLFIPFIFC  | 0 | 0 | 0 | 2  | 8  | 13 |
| CIFDINMPLIPC  | 0 | 0 | 0 | 0  | 2  | 13 |
| CLFDLFLPFIFC  | 0 | 0 | 1 | 12 | 18 | 13 |
| CVYDLFMPFIYC  | 0 | 0 | 0 | 0  | 21 | 13 |
| CLFDLFLPLIFC  | 0 | 0 | 0 | 10 | 31 | 13 |
| CTFDIFLPPFICC | 0 | 0 | 0 | 0  | 10 | 13 |
| CTFDAFLPFIFC  | 0 | 0 | 0 | 14 | 56 | 13 |
| CLSDSFVPFIFC  | 0 | 0 | 0 | 11 | 20 | 13 |
| CNIDIHMPFIPC  | 0 | 0 | 0 | 0  | 6  | 13 |
| CNFDNWLPFIYC  | 0 | 0 | 0 | 2  | 18 | 13 |
| CLFDVFCDFIIC  | 0 | 0 | 1 | 15 | 63 | 13 |
| CLFDLFLPFIFC  | 0 | 0 | 1 | 8  | 34 | 13 |
| CTFDLFLPFIFC  | 0 | 0 | 1 | 2  | 15 | 13 |
| CTFDLFLPSIFC  | 0 | 0 | 0 | 6  | 24 | 13 |
| CTFDLFLPFIFC  | 0 | 0 | 1 | 13 | 49 | 13 |
| CVFDIFIPVYIC  | 0 | 0 | 0 | 2  | 21 | 13 |
| CVYDIFMPFIFC  | 0 | 0 | 0 | 0  | 10 | 13 |
| CVFDLFLPFVLC  | 0 | 0 | 2 | 11 | 37 | 13 |
| CYFDPHFIFIHC  | 0 | 0 | 0 | 4  | 27 | 13 |

|               |   |   |   |    |    |    |
|---------------|---|---|---|----|----|----|
| CVYDIFVPIIIC  | 0 | 0 | 0 | 6  | 45 | 13 |
| CVYDIFVPIIIS  | 0 | 0 | 1 | 0  | 16 | 13 |
| CVFGLFLPFIFC  | 0 | 0 | 0 | 4  | 11 | 13 |
| CVFDTHMPFIFC  | 0 | 0 | 0 | 3  | 8  | 13 |
| CVFDLFLPFVLC  | 1 | 0 | 0 | 4  | 37 | 13 |
| CVFDSFSPFIFC  | 1 | 0 | 0 | 5  | 12 | 13 |
| CVFDLFLPSIFC  | 0 | 0 | 0 | 9  | 23 | 13 |
| CIFDIHMPFIPC  | 0 | 0 | 0 | 1  | 3  | 12 |
| CIFDIFMPFTLC  | 0 | 0 | 1 | 11 | 31 | 12 |
| CIFDIFMPFIFC  | 0 | 0 | 0 | 2  | 4  | 12 |
| CLFDLFVPIIIC  | 0 | 0 | 0 | 1  | 14 | 12 |
| CCFDSFLPSIFC  | 0 | 0 | 0 | 9  | 13 | 12 |
| CCFDPHFIFIPC  | 0 | 0 | 2 | 9  | 24 | 12 |
| CLFDIFSPFIFC  | 0 | 0 | 0 | 7  | 24 | 12 |
| CIFDIPMPFIPC  | 0 | 0 | 0 | 2  | 2  | 12 |
| CIFDIHMPFVLC  | 0 | 0 | 0 | 1  | 29 | 12 |
| CIVDIHMPFIPC  | 0 | 0 | 0 | 0  | 7  | 12 |
| CIFDLFAPFIFC  | 0 | 0 | 0 | 0  | 21 | 12 |
| CIFDTFMPFIYC  | 0 | 0 | 0 | 0  | 2  | 12 |
| CLFDLFLPYIFC  | 0 | 0 | 0 | 4  | 16 | 12 |
| CIFDLLCPFIFC  | 0 | 0 | 0 | 18 | 26 | 12 |
| CIVDLFLPFIFC  | 0 | 0 | 0 | 0  | 14 | 12 |
| CIFETFLPFIFC  | 0 | 0 | 0 | 0  | 6  | 12 |
| CISDLFVPIIIC  | 1 | 0 | 1 | 2  | 17 | 12 |
| CIFDTFLSIFC   | 0 | 0 | 0 | 1  | 13 | 12 |
| CIFDTFLPIIIC  | 0 | 0 | 0 | 0  | 17 | 12 |
| CIFDTFFPFIFC  | 0 | 0 | 0 | 1  | 6  | 12 |
| CIFDLWLPPFTVC | 0 | 0 | 0 | 19 | 52 | 12 |
| CLFDSFIPFVFC  | 0 | 0 | 0 | 6  | 24 | 12 |
| CLFDLFLPFIFC  | 0 | 0 | 0 | 12 | 27 | 12 |
| CIFDTLFLPFIFC | 0 | 0 | 0 | 1  | 4  | 12 |
| CLFDLFLPFIFC  | 0 | 0 | 4 | 16 | 30 | 12 |
| FVDSFLPFIFC   | 0 | 0 | 0 | 0  | 12 | 12 |
| CYLDPHFIFIPC  | 0 | 0 | 0 | 14 | 16 | 12 |
| CTFDLFLPFIFC  | 0 | 0 | 0 | 3  | 30 | 12 |
| CTFDLFLPFIFC  | 0 | 0 | 0 | 12 | 34 | 12 |
| CTFDLFLPFIFC  | 0 | 0 | 0 | 4  | 18 | 12 |
| CTFDLFLPFIFC  | 0 | 0 | 0 | 3  | 19 | 12 |
| CLFDSFLPFIFC  | 0 | 0 | 0 | 0  | 18 | 12 |
| FDSFLPFIFC    | 0 | 0 | 1 | 0  | 10 | 12 |
| CLYDSFLPFIFC  | 0 | 0 | 0 | 4  | 50 | 12 |
| CLFDSFVPIIIC  | 0 | 0 | 0 | 6  | 88 | 12 |
| CVFDLFLPFIFC  | 0 | 0 | 0 | 3  | 11 | 12 |
| CSFDLFLPFIFC  | 0 | 0 | 0 | 0  | 22 | 12 |
| CVFDIHMPPFIFC | 0 | 0 | 0 | 0  | 4  | 12 |
| CVFDSFLPFIFC  | 0 | 0 | 0 | 2  | 13 | 12 |
| CVFDLFLPFIFC  | 0 | 0 | 0 | 0  | 8  | 12 |
| CYFDSFLPFIFC  | 0 | 0 | 0 | 3  | 31 | 12 |
| CYFDPHFIFIPC  | 0 | 0 | 0 | 7  | 16 | 12 |
| CVYDLFSPFIYC  | 0 | 0 | 2 | 7  | 43 | 12 |
| CVFDSFLPFVMC  | 1 | 0 | 1 | 13 | 56 | 12 |
| CVYDIFVPIIIC  | 0 | 0 | 0 | 4  | 19 | 12 |



|               |   |   |    |     |     |    |
|---------------|---|---|----|-----|-----|----|
| CVFDSFLPFIIR  | 0 | 0 | 0  | 1   | 12  | 12 |
| CVFDSFLPFIHC  | 0 | 0 | 0  | 0   | 6   | 12 |
| CVFDLFMPFIIC  | 0 | 0 | 0  | 0   | 4   | 12 |
| CIFDLFLPFTFC  | 0 | 0 | 0  | 3   | 19  | 11 |
| CLFDLFSFPFIFC | 0 | 0 | 1  | 6   | 13  | 11 |
| CCFDSFSPFIFC  | 0 | 0 | 0  | 6   | 20  | 11 |
| CCFDSLSPFIFC  | 0 | 0 | 1  | 8   | 31  | 11 |
| CIFDLFCPFIAC  | 0 | 0 | 1  | 20  | 42  | 11 |
| CFYDIFVPIIC   | 0 | 0 | 0  | 2   | 7   | 11 |
| CAFDLFLPFILC  | 0 | 0 | 0  | 4   | 17  | 11 |
| CIFDIFMPLIPC  | 0 | 0 | 0  | 1   | 3   | 11 |
| CIFDIHKPFITC  | 0 | 0 | 0  | 0   | 7   | 11 |
| CIFDLFVPIFISC | 0 | 0 | 1  | 4   | 16  | 11 |
| CIFDNFLPFIFC  | 0 | 0 | 0  | 0   | 9   | 11 |
| CIFDSWLPFIIC  | 0 | 0 | 0  | 0   | 2   | 11 |
| CISDNWLPFIYC  | 0 | 0 | 2  | 15  | 35  | 11 |
| CISDLFCPFIVC  | 0 | 0 | 0  | 9   | 13  | 11 |
| CIFDNWLPFTYC  | 0 | 0 | 1  | 12  | 53  | 11 |
| CILDIFMPFILC  | 0 | 0 | 2  | 11  | 28  | 11 |
| CHFDPHFIFIPC  | 0 | 0 | 1  | 6   | 11  | 11 |
| CIFDSWLPFILC  | 0 | 0 | 0  | 0   | 2   | 11 |
| CIIDHMPYIPC   | 0 | 0 | 0  | 0   | 4   | 11 |
| CLFDIFMPFILC  | 0 | 0 | 0  | 1   | 16  | 11 |
| CIFDNWHPFIYC  | 0 | 0 | 1  | 4   | 17  | 11 |
| CLFDAFLPFIFC  | 0 | 0 | 0  | 7   | 6   | 11 |
| CLFDHFLPFVYC  | 1 | 1 | 37 | 279 | 241 | 11 |
| CLFDIFLPSIFC  | 0 | 0 | 1  | 9   | 11  | 11 |
| CLFDIFMPFIIC  | 0 | 1 | 0  | 1   | 11  | 11 |
| CLFDLFCPFTFC  | 0 | 0 | 1  | 14  | 27  | 11 |
| CLFDLFLPFIPC  | 0 | 1 | 2  | 30  | 27  | 11 |
| CLFDNWLPFIYC  | 0 | 0 | 0  | 5   | 21  | 11 |
| CLFDTFVPIFVFC | 0 | 0 | 0  | 20  | 56  | 11 |
| CVFDLFLPFIFC  | 1 | 0 | 1  | 4   | 29  | 11 |
| CTFDLFLPFVIC  | 0 | 0 | 0  | 1   | 9   | 11 |
| CVFDLHCPFILC  | 2 | 0 | 1  | 16  | 70  | 11 |
| CLFDTLVPIFIC  | 0 | 1 | 0  | 20  | 38  | 11 |
| CLYDSFLPFIFC  | 0 | 0 | 0  | 1   | 14  | 11 |
| YDLFLPFIYC    | 0 | 0 | 0  | 6   | 22  | 11 |
| CNFDLFLPFIFC  | 0 | 0 | 0  | 0   | 4   | 11 |
| CTFDLFLPFIFC  | 0 | 0 | 0  | 7   | 24  | 11 |
| CVCDIFVPIIIC  | 0 | 0 | 1  | 5   | 12  | 11 |
| CVFDSFLPFILY  | 0 | 0 | 0  | 2   | 6   | 11 |
| CVFDLFCPFIIC  | 0 | 0 | 0  | 0   | 3   | 11 |
| CVFDLFCPFIIC  | 0 | 0 | 0  | 2   | 11  | 11 |
| CVFDLFLPYIFC  | 0 | 0 | 0  | 1   | 24  | 11 |
| CVFDLFLVPIFIC | 0 | 0 | 0  | 2   | 14  | 11 |
| FDLFCPFIIC    | 0 | 0 | 1  | 5   | 15  | 11 |
| CVFDNWLPFIIC  | 0 | 0 | 0  | 1   | 2   | 11 |
| CVYNIFVPIIIC  | 0 | 0 | 0  | 2   | 11  | 11 |
| CVFDSFLPFTLC  | 0 | 0 | 1  | 6   | 28  | 11 |
| CVFDSFLPYIFC  | 0 | 0 | 0  | 0   | 5   | 11 |
| CVFDSFLFILC   | 0 | 0 | 0  | 1   | 4   | 11 |

|               |   |   |    |     |     |    |
|---------------|---|---|----|-----|-----|----|
| CVHDLFLPFIYC  | 0 | 0 | 0  | 6   | 11  | 11 |
| CVYDIFVQFIIC  | 0 | 0 | 0  | 0   | 16  | 11 |
| CVYDIIVPFIIC  | 0 | 0 | 0  | 3   | 7   | 11 |
| CVYDTFLPFIFC  | 0 | 0 | 0  | 0   | 4   | 11 |
| CVFGSFLPFILC  | 0 | 0 | 0  | 2   | 11  | 11 |
| RLFDSFVPIFIC  | 0 | 0 | 0  | 5   | 10  | 11 |
| RTFDLFLPFIFC  | 1 | 0 | 0  | 3   | 9   | 11 |
| SIFDTFLPFIFC  | 0 | 0 | 0  | 0   | 5   | 11 |
| CLFDSFVPSIFC  | 1 | 0 | 0  | 14  | 16  | 11 |
| CYFDIFLPIIIC  | 0 | 0 | 0  | 2   | 26  | 11 |
| CIFDIDMPFIIC  | 0 | 0 | 0  | 0   | 3   | 10 |
| CCFDTFVPIFIC  | 0 | 0 | 0  | 7   | 8   | 10 |
| CCFDSFMPFIIC  | 0 | 0 | 0  | 4   | 14  | 10 |
| CEFDSFLPFIFC  | 0 | 0 | 0  | 0   | 9   | 10 |
| CCSDSFLPFIFC  | 0 | 0 | 1  | 6   | 25  | 10 |
| CLFDHFFPFIIC  | 1 | 0 | 43 | 192 | 138 | 10 |
| CIFDIFMPSILC  | 0 | 0 | 0  | 8   | 18  | 10 |
| CIFDIFMPFVFC  | 0 | 0 | 0  | 0   | 5   | 10 |
| CLFDTMLPFIFC  | 0 | 0 | 0  | 3   | 19  | 10 |
| CIFDIHMPFIIC  | 0 | 0 | 0  | 0   | 11  | 10 |
| CIFDTWLPFIYC  | 0 | 0 | 0  | 2   | 12  | 10 |
| CIFDIHMPFIIF  | 0 | 0 | 0  | 1   | 4   | 10 |
| CLFDAFVPIFIC  | 0 | 0 | 0  | 5   | 16  | 10 |
| CLFDAFCDFIIC  | 0 | 0 | 0  | 17  | 41  | 10 |
| CIYDNWLPFIYC  | 0 | 0 | 0  | 8   | 29  | 10 |
| CKFDTFLPFIFC  | 0 | 0 | 0  | 1   | 13  | 10 |
| CIFDTFLPFLCC  | 0 | 0 | 0  | 1   | 7   | 10 |
| CIFDSFVPIIIC  | 0 | 0 | 0  | 1   | 3   | 10 |
| CIFDPHFIFIPC  | 0 | 0 | 0  | 0   | 8   | 10 |
| CIFDLHCPFIIC  | 0 | 0 | 0  | 2   | 16  | 10 |
| CIFDIHMPVIPC  | 0 | 0 | 0  | 0   | 2   | 10 |
| CLFDLFLPFVFC  | 0 | 0 | 0  | 7   | 9   | 10 |
| CIFDDWLPFIYC  | 0 | 0 | 0  | 5   | 19  | 10 |
| CLFDTFVPIFIC  | 0 | 0 | 0  | 8   | 27  | 10 |
| CLFDLFLVPIFIC | 0 | 0 | 0  | 0   | 21  | 10 |
| CVFDAFCPFIIC  | 0 | 0 | 1  | 19  | 48  | 10 |
| CTIDLFLPFIFC  | 0 | 0 | 0  | 4   | 19  | 10 |
| CTFDSWLPFILC  | 0 | 0 | 0  | 0   | 14  | 10 |
| CTFDIFMPFIIC  | 0 | 0 | 0  | 0   | 3   | 10 |
| CLYDSFLTIFIC  | 0 | 0 | 0  | 2   | 12  | 10 |
| CLLDLFCPFIIC  | 0 | 0 | 0  | 10  | 19  | 10 |
| CLLDIFLPIIIC  | 0 | 0 | 0  | 4   | 13  | 10 |
| CVFDLFLVPIFIC | 0 | 0 | 0  | 7   | 36  | 10 |
| CLFDLFLVPIFIC | 0 | 0 | 0  | 12  | 14  | 10 |
| CVFDLFLVPIFIC | 0 | 0 | 0  | 0   | 10  | 10 |
| CLYDIFLPIFIC  | 0 | 0 | 0  | 6   | 19  | 10 |
| CVFDSFLPFTPC  | 0 | 0 | 0  | 2   | 4   | 10 |
| CVYDLFLPFIYS  | 0 | 0 | 0  | 0   | 17  | 10 |
| RVYDIFVPIIIC  | 0 | 0 | 0  | 0   | 10  | 10 |
| CVFDLFLVFLC   | 0 | 1 | 1  | 2   | 18  | 10 |
| GIFDIHMPFIIC  | 0 | 0 | 0  | 0   | 3   | 10 |
| CYFDIFLPIIYC  | 0 | 0 | 0  | 12  | 45  | 10 |

|              |   |   |    |     |     |    |
|--------------|---|---|----|-----|-----|----|
| CYFDPHFIFIPS | 0 | 0 | 0  | 2   | 11  | 10 |
| CVYDIFVPIIC  | 0 | 0 | 0  | 2   | 15  | 10 |
| CVSDSFLPFILC | 0 | 0 | 0  | 2   | 16  | 10 |
| CVSDSFLPFIFC | 0 | 0 | 0  | 0   | 3   | 10 |
| CVFDIFVPIFIC | 0 | 0 | 0  | 0   | 4   | 10 |
| CLFDLHLPFICC | 0 | 0 | 1  | 2   | 32  | 9  |
| CCFDIFLPFVFC | 0 | 0 | 1  | 4   | 10  | 9  |
| CCFDSFLPFISC | 0 | 0 | 0  | 13  | 32  | 9  |
| CDFDIHMPFIPC | 0 | 0 | 0  | 0   | 4   | 9  |
| CFDPPFFIFIPC | 0 | 0 | 1  | 4   | 6   | 9  |
| CIFDIFVPIFIC | 0 | 0 | 0  | 0   | 3   | 9  |
| CLFDLYLPFIFC | 0 | 0 | 2  | 15  | 37  | 9  |
| CIFDSFFFICCC | 0 | 0 | 0  | 3   | 37  | 9  |
| CIFDIHMPFTLC | 0 | 0 | 1  | 1   | 6   | 9  |
| CLCDSFLPFIFC | 0 | 0 | 0  | 3   | 11  | 9  |
| CIFDIHMTFITC | 0 | 0 | 0  | 0   | 2   | 9  |
| CIFYTFLPFIFC | 0 | 0 | 0  | 0   | 3   | 9  |
| CIFDLFLPFICC | 0 | 0 | 0  | 1   | 2   | 9  |
| CIFDLFVPSIFC | 0 | 0 | 0  | 3   | 13  | 9  |
| CIFDNRLPFIFC | 0 | 0 | 0  | 0   | 4   | 9  |
| CVFDLFPFILC  | 0 | 0 | 0  | 0   | 6   | 9  |
| CIFDSSLPFIFC | 0 | 0 | 0  | 4   | 35  | 9  |
| CILDTFLPFIIC | 0 | 0 | 0  | 0   | 1   | 9  |
| CILDIFMPFIPC | 0 | 0 | 0  | 0   | 4   | 9  |
| CIYDIFVPIFIC | 0 | 0 | 0  | 0   | 8   | 9  |
| CIYDLFCPFIVC | 0 | 0 | 0  | 4   | 12  | 9  |
| CLFDIFCPLILC | 0 | 0 | 0  | 13  | 20  | 9  |
| CLFDIFLPFVLC | 0 | 0 | 1  | 2   | 17  | 9  |
| CLFDISLPIIIC | 0 | 0 | 0  | 5   | 8   | 9  |
| CLFDLFCPFISC | 0 | 0 | 0  | 19  | 19  | 9  |
| CLFDLYPFILC  | 0 | 0 | 0  | 2   | 22  | 9  |
| CLFDSFCPFIFC | 0 | 0 | 0  | 21  | 26  | 9  |
| CVFDLWLPFYIC | 0 | 0 | 2  | 19  | 57  | 9  |
| CLLDLFPFVFC  | 0 | 0 | 0  | 9   | 8   | 9  |
| CLFDSFFPFILC | 0 | 2 | 30 | 164 | 101 | 9  |
| CLFDSVVPFIFC | 0 | 0 | 0  | 8   | 23  | 9  |
| CLFDTFVPIFIC | 0 | 0 | 1  | 16  | 23  | 9  |
| CLFDVFCDFILC | 0 | 0 | 1  | 46  | 62  | 9  |
| CLFDSFFPFIFC | 0 | 0 | 1  | 7   | 26  | 9  |
| CLFDVFLPFIFC | 0 | 0 | 0  | 6   | 7   | 9  |
| CLFGLFCPFIFC | 0 | 0 | 0  | 7   | 7   | 9  |
| CLYDNLLPFIPC | 0 | 0 | 0  | 4   | 15  | 9  |
| CTFDSFLPFILC | 0 | 0 | 0  | 0   | 11  | 9  |
| CSFDSFLPFIFC | 0 | 0 | 0  | 6   | 18  | 9  |
| CTFDIHMPFILC | 0 | 0 | 0  | 0   | 3   | 9  |
| CTFDLFIPIVIC | 1 | 0 | 0  | 18  | 43  | 9  |
| CLFNIFLPFIFC | 0 | 0 | 1  | 2   | 4   | 9  |
| CTFDLILPFIFC | 0 | 0 | 0  | 2   | 6   | 9  |
| CVFDLYLPFIFC | 0 | 0 | 0  | 3   | 15  | 9  |
| CVFDIHMPFITC | 0 | 0 | 0  | 0   | 3   | 9  |
| CVYDLFLPYIYC | 0 | 0 | 0  | 2   | 7   | 9  |
| CVYDLFLPFTFC | 0 | 0 | 0  | 4   | 25  | 9  |

|               |   |   |    |     |     |   |
|---------------|---|---|----|-----|-----|---|
| CVFDSFFPFILC  | 0 | 0 | 0  | 1   | 6   | 9 |
| CVFDIHMPILPC  | 0 | 0 | 0  | 1   | 3   | 9 |
| CVFDSFLPFIFC  | 0 | 0 | 0  | 3   | 7   | 9 |
| CVFDSHCPIFIC  | 0 | 0 | 0  | 1   | 27  | 9 |
| CVFHSFLPIIIC  | 0 | 0 | 0  | 0   | 5   | 9 |
| CVYDIFVSIIC   | 0 | 0 | 0  | 1   | 15  | 9 |
| CVYDLFLPIIYC  | 0 | 0 | 0  | 3   | 13  | 9 |
| CVYDIFVPIFIC  | 0 | 0 | 0  | 2   | 17  | 9 |
| CVYDMFLPIIYC  | 0 | 0 | 2  | 1   | 10  | 9 |
| FIFDTLFPFIFC  | 0 | 0 | 1  | 1   | 4   | 9 |
| RLYDSFLPFIFC  | 0 | 0 | 0  | 3   | 11  | 9 |
| WIFDIHMPFIPC  | 0 | 0 | 0  | 0   | 3   | 9 |
| YTFDLFLPFIFC  | 0 | 0 | 0  | 1   | 6   | 9 |
| CLFDLFLPFILC  | 0 | 0 | 1  | 10  | 14  | 9 |
| CVFDLFAPIFIC  | 0 | 0 | 0  | 2   | 10  | 9 |
| CFDHPHLPFIFC  | 0 | 0 | 0  | 1   | 8   | 8 |
| CIFDIFMPSIPC  | 1 | 0 | 0  | 0   | 3   | 8 |
| CCFDILLPFIFC  | 0 | 0 | 0  | 1   | 11  | 8 |
| CCFDSFLPFTFC  | 0 | 0 | 0  | 16  | 50  | 8 |
| CCFDSFPPFIFC  | 0 | 0 | 0  | 2   | 16  | 8 |
| CCFDSFVPFIFC  | 0 | 0 | 0  | 9   | 9   | 8 |
| CLFDLMPFVFC   | 0 | 0 | 0  | 2   | 9   | 8 |
| CFYDLFIPFIFC  | 0 | 0 | 22 | 113 | 74  | 8 |
| CFYDLFLPLIFC  | 0 | 0 | 1  | 5   | 18  | 8 |
| CCFDIFLPFTFC  | 0 | 0 | 0  | 5   | 18  | 8 |
| CIFDIFIPFVFC  | 0 | 0 | 0  | 0   | 2   | 8 |
| CFYDLFLPFTFC  | 0 | 0 | 3  | 3   | 14  | 8 |
| CVFDSFLRPIIC  | 0 | 0 | 0  | 1   | 3   | 8 |
| CIFDTHMPFTPC  | 0 | 0 | 0  | 2   | 4   | 8 |
| CIFDIHMPFITC  | 0 | 0 | 0  | 0   | 1   | 8 |
| CIFDINMTFIPC  | 0 | 0 | 0  | 0   | 3   | 8 |
| CIFDIHMPFTAC  | 0 | 0 | 0  | 0   | 5   | 8 |
| CIFDTHFPFIVC  | 0 | 0 | 0  | 0   | 1   | 8 |
| CVFDSFLPSIFC  | 0 | 0 | 0  | 0   | 4   | 8 |
| CIFDINMPFIIC  | 0 | 0 | 0  | 0   | 3   | 8 |
| CIFDLFCPIIIC  | 0 | 0 | 0  | 0   | 12  | 8 |
| CIFDNHMPPIIC  | 0 | 0 | 0  | 0   | 2   | 8 |
| CIFDPPFPFIPC  | 0 | 0 | 1  | 27  | 18  | 8 |
| CIFDSWLPFIPC  | 0 | 0 | 0  | 0   | 1   | 8 |
| CIFDTLFPNFC   | 0 | 0 | 0  | 1   | 5   | 8 |
| CIFDTMPFIIC   | 0 | 0 | 0  | 0   | 2   | 8 |
| CIFDTHMPFIIC  | 0 | 0 | 0  | 0   | 0   | 8 |
| CLFDLFLPFILC  | 1 | 0 | 0  | 13  | 20  | 8 |
| CLFDLFLPIIYC  | 0 | 1 | 0  | 1   | 10  | 8 |
| CIFDTLPIIIC   | 0 | 0 | 0  | 3   | 8   | 8 |
| CIFDTLLPIIIC  | 0 | 0 | 0  | 0   | 6   | 8 |
| CIFDVMPFIFC   | 0 | 0 | 0  | 0   | 2   | 8 |
| CIFGLFCPIIIC  | 0 | 0 | 0  | 5   | 11  | 8 |
| CILDLCFPIIIC  | 0 | 0 | 1  | 4   | 24  | 8 |
| CILDNLWLPFIFC | 0 | 0 | 0  | 0   | 7   | 8 |
| CLFDHFIDFIFC  | 0 | 0 | 28 | 114 | 112 | 8 |
| CLFDSFFPFIFC  | 0 | 0 | 3  | 23  | 23  | 8 |

|               |   |   |    |    |    |   |
|---------------|---|---|----|----|----|---|
| CVYDFVPPFIC   | 0 | 0 | 0  | 2  | 8  | 8 |
| CVFDSFLTIFC   | 0 | 0 | 0  | 0  | 3  | 8 |
| CLYDLFCPFIFC  | 0 | 0 | 0  | 3  | 7  | 8 |
| CLFDSFVPPFISC | 0 | 0 | 0  | 10 | 30 | 8 |
| CLFDSFLPLILC  | 0 | 0 | 1  | 4  | 18 | 8 |
| CLFDTFIPFILC  | 0 | 0 | 0  | 17 | 23 | 8 |
| CLFDTFLPFTFC  | 0 | 1 | 1  | 20 | 35 | 8 |
| CLFDTIVPPFIFC | 0 | 0 | 0  | 3  | 6  | 8 |
| CLFDVFLPFIFC  | 0 | 0 | 0  | 2  | 17 | 8 |
| CLFGTFLPFIFC  | 1 | 0 | 1  | 6  | 11 | 8 |
| CLYDIFVPPFIC  | 0 | 0 | 0  | 0  | 14 | 8 |
| CLFDSHLPFIFC  | 0 | 2 | 1  | 6  | 25 | 8 |
| CVFDLFLPFVIC  | 0 | 0 | 0  | 0  | 4  | 8 |
| CNYDIHMPPFIPC | 0 | 0 | 0  | 0  | 3  | 8 |
| CTYDTFLPFIFC  | 0 | 0 | 0  | 4  | 14 | 8 |
| CTFDLFPFIFC   | 0 | 0 | 0  | 0  | 10 | 8 |
| CVFDIFCPFIFC  | 0 | 0 | 0  | 0  | 1  | 8 |
| CTFDLFLPFVLC  | 0 | 0 | 0  | 8  | 27 | 8 |
| CTFDLFLPFIFC  | 0 | 0 | 0  | 1  | 1  | 8 |
| CTFDIFLPFVLC  | 0 | 0 | 0  | 3  | 27 | 8 |
| CTFDLFLPYIFC  | 0 | 0 | 1  | 12 | 30 | 8 |
| CVFDLFPFVFC   | 0 | 0 | 0  | 1  | 16 | 8 |
| CNFDIHMPLIPC  | 0 | 0 | 0  | 0  | 1  | 8 |
| CVYDLYLPIIYC  | 0 | 0 | 1  | 2  | 13 | 8 |
| CVFDNWLPIIYC  | 0 | 0 | 0  | 0  | 7  | 8 |
| CVFDVHMPFIPC  | 0 | 0 | 0  | 3  | 3  | 8 |
| CVFGIHMPPFIPC | 0 | 0 | 0  | 1  | 0  | 8 |
| CVFVSFLPFILC  | 0 | 0 | 0  | 0  | 9  | 8 |
| CVFDIFLPFIYC  | 0 | 0 | 0  | 0  | 2  | 8 |
| CVYDLFLPFVYC  | 0 | 0 | 0  | 6  | 30 | 8 |
| CVFDSFLPLVLC  | 0 | 0 | 2  | 22 | 27 | 8 |
| CVFDVFCPPVFC  | 0 | 0 | 0  | 10 | 32 | 8 |
| CYFDIFLPFIFC  | 0 | 0 | 0  | 1  | 19 | 8 |
| CYFDPHFIFIFC  | 0 | 0 | 0  | 0  | 10 | 8 |
| CYFDPHIIFIPC  | 0 | 0 | 0  | 2  | 9  | 8 |
| CYFDRPFIFIPC  | 0 | 0 | 0  | 5  | 9  | 8 |
| RIFDNWLPIIYC  | 0 | 0 | 0  | 4  | 8  | 8 |
| YTFDTFLPFIFC  | 0 | 0 | 0  | 0  | 4  | 8 |
| CLFDLYCDFIFC  | 0 | 0 | 0  | 1  | 16 | 8 |
| CVYDSFLPFIFC  | 0 | 0 | 0  | 0  | 8  | 8 |
| CLFDIFMPPFIFC | 0 | 0 | 0  | 0  | 6  | 7 |
| CAFDDLFLPFIFC | 0 | 0 | 0  | 1  | 3  | 7 |
| CAFDFLPFILC   | 0 | 0 | 0  | 6  | 15 | 7 |
| CIFATFLPFIFC  | 0 | 0 | 0  | 0  | 0  | 7 |
| CIFDLFCPSIVC  | 0 | 0 | 0  | 6  | 10 | 7 |
| CFFDLHLFPVYC  | 0 | 0 | 3  | 14 | 23 | 7 |
| CIFDIHKPFIPS  | 0 | 0 | 0  | 0  | 3  | 7 |
| CIFDAFVSFIVC  | 1 | 0 | 28 | 90 | 77 | 7 |
| CIFDIFCPFILC  | 0 | 0 | 0  | 0  | 5  | 7 |
| CIFDIFMPPFTFC | 0 | 0 | 0  | 2  | 11 | 7 |
| CIFDTFLPFIMC  | 0 | 1 | 0  | 0  | 2  | 7 |
| CIFDIHKPFNPC  | 0 | 0 | 0  | 1  | 3  | 7 |

|               |   |   |   |    |    |   |
|---------------|---|---|---|----|----|---|
| CIFDIHKPYIPC  | 0 | 0 | 0 | 0  | 2  | 7 |
| CIFDIHMNFIPC  | 0 | 0 | 0 | 0  | 1  | 7 |
| CIFDISMPFILC  | 0 | 0 | 1 | 6  | 10 | 7 |
| CIFDISMPFIPC  | 0 | 0 | 0 | 0  | 3  | 7 |
| CIFDLFCPPVFC  | 0 | 0 | 0 | 0  | 2  | 7 |
| CIFDLFDPFIFC  | 0 | 0 | 0 | 5  | 14 | 7 |
| CLFDILCPFILC  | 0 | 0 | 1 | 10 | 12 | 7 |
| CIFDKWLPIIYC  | 0 | 0 | 0 | 3  | 20 | 7 |
| CIFDNCLPFIFC  | 0 | 0 | 0 | 2  | 8  | 7 |
| CLFDIFCPFIRC  | 0 | 0 | 0 | 9  | 22 | 7 |
| CIFDLFSPFIVC  | 0 | 0 | 1 | 3  | 19 | 7 |
| CIFDSFSPFIPC  | 0 | 0 | 0 | 3  | 8  | 7 |
| CIFDSFAPFIYC  | 0 | 0 | 0 | 3  | 6  | 7 |
| CIFDNWLPIIYC  | 0 | 0 | 0 | 2  | 10 | 7 |
| CIFDNWLPSIFC  | 0 | 0 | 0 | 0  | 3  | 7 |
| CIFDNWLPPFTFC | 0 | 0 | 0 | 1  | 11 | 7 |
| CIFDLFVTFIFC  | 0 | 0 | 0 | 1  | 2  | 7 |
| CIFDNWLLFIYC  | 0 | 0 | 0 | 4  | 7  | 7 |
| CLFDLFFPFIVC  | 0 | 0 | 1 | 7  | 25 | 7 |
| CIFDLFSPILIFC | 0 | 0 | 1 | 1  | 8  | 7 |
| CIFDLFVPPVYC  | 0 | 0 | 0 | 1  | 9  | 7 |
| CIFDSWLPFVFC  | 0 | 0 | 0 | 0  | 5  | 7 |
| CIFDNWLPIITC  | 0 | 0 | 0 | 0  | 23 | 7 |
| CIFDTFLPFIHC  | 0 | 0 | 0 | 0  | 3  | 7 |
| CYDIFMPPFILC  | 0 | 0 | 0 | 4  | 8  | 7 |
| CIFDTFLPLIIC  | 0 | 0 | 0 | 0  | 1  | 7 |
| CIFDTFSPFIPC  | 0 | 0 | 0 | 0  | 2  | 7 |
| CIFDTFVPPFIYC | 0 | 0 | 0 | 0  | 7  | 7 |
| CIFDVFMPPFILC | 0 | 0 | 0 | 2  | 20 | 7 |
| CIFGLFVPPFIFC | 0 | 0 | 0 | 4  | 12 | 7 |
| CIFDNWLPIIYC  | 0 | 0 | 0 | 2  | 20 | 7 |
| CILDIFMPPFIFC | 0 | 0 | 0 | 0  | 2  | 7 |
| CISDIFMPPFILC | 0 | 0 | 0 | 4  | 4  | 7 |
| CIWDSFVPFIMC  | 0 | 0 | 0 | 8  | 36 | 7 |
| CIWDTFVPPFILC | 0 | 1 | 0 | 0  | 14 | 7 |
| CIYDLFVPPFIFC | 0 | 0 | 0 | 2  | 4  | 7 |
| CTFDLFLPFVYC  | 0 | 0 | 0 | 0  | 6  | 7 |
| CIFDLFFPFIFC  | 0 | 0 | 0 | 1  | 1  | 7 |
| CTSDIFLPFILC  | 0 | 0 | 0 | 7  | 8  | 7 |
| CLFGIFLPFIFC  | 1 | 0 | 0 | 10 | 10 | 7 |
| CLFDLHLFPVFC  | 0 | 0 | 2 | 23 | 30 | 7 |
| CLFDPFLSFILC  | 1 | 0 | 1 | 15 | 59 | 7 |
| CLFDSFFPFIFC  | 0 | 0 | 1 | 3  | 7  | 7 |
| CLFDSFPPFIFC  | 0 | 0 | 0 | 0  | 1  | 7 |
| CLFDTFDPFIFC  | 0 | 0 | 0 | 6  | 17 | 7 |
| CLFDTLHFIFC   | 0 | 0 | 0 | 0  | 4  | 7 |
| CLFDVFCDFIPC  | 0 | 0 | 0 | 3  | 26 | 7 |
| CTFDLFMPPFIPC | 0 | 0 | 0 | 0  | 2  | 7 |
| CLIDIFLPFIFC  | 0 | 0 | 0 | 3  | 6  | 7 |
| CLLDIFCPFILC  | 0 | 0 | 0 | 7  | 13 | 7 |
| CLLDTFVPPFIFC | 0 | 0 | 1 | 6  | 25 | 7 |
| CLSDIFLPFIIC  | 0 | 0 | 0 | 0  | 8  | 7 |

|               |   |   |   |    |    |   |               |   |   |   |    |    |   |
|---------------|---|---|---|----|----|---|---------------|---|---|---|----|----|---|
| CLYDSFLPFIFY  | 0 | 0 | 0 | 5  | 12 | 7 | CIFDIHMHFHIC  | 0 | 0 | 0 | 0  | 2  | 6 |
| CLFDSFDPFIFC  | 0 | 0 | 0 | 6  | 25 | 7 | CIFDIHTPFILC  | 0 | 0 | 0 | 0  | 5  | 6 |
| CTFDLFLPFIF   | 0 | 0 | 0 | 0  | 4  | 7 | CPFDIFLPFHIC  | 0 | 0 | 0 | 5  | 15 | 6 |
| CTFDLFCPFIFC  | 0 | 0 | 0 | 1  | 16 | 7 | CLFDSFLPFTLC  | 0 | 0 | 1 | 6  | 11 | 6 |
| CTFDHLFPFIFC  | 0 | 0 | 0 | 5  | 17 | 7 | CGFDLFLPFIFC  | 0 | 0 | 0 | 0  | 5  | 6 |
| CTFDLFAPIFYC  | 0 | 0 | 0 | 4  | 19 | 7 | CIFDIFCPFIFC  | 0 | 0 | 0 | 0  | 3  | 6 |
| CNFDLFCPFIVC  | 0 | 0 | 0 | 0  | 10 | 7 | CVNDLFLPFIVC  | 0 | 0 | 0 | 3  | 9  | 6 |
| FDLFCPFIFC    | 0 | 0 | 0 | 1  | 3  | 7 | CIFDIFIPFIFC  | 0 | 0 | 0 | 0  | 2  | 6 |
| CLYDYFLPFIFC  | 0 | 0 | 0 | 1  | 9  | 7 | CIFDIFKPFILC  | 1 | 0 | 0 | 1  | 10 | 6 |
| CVCDLFLPFIVC  | 0 | 0 | 0 | 3  | 15 | 7 | CIFDIFMPFIHC  | 0 | 0 | 1 | 2  | 16 | 6 |
| CLFDLHEPFIFC  | 0 | 0 | 0 | 0  | 3  | 7 | CIFDIFMPFIPS  | 0 | 0 | 0 | 0  | 2  | 6 |
| CPFDLFCPFIFC  | 0 | 0 | 1 | 13 | 16 | 7 | CIFDIFMPFIPIY | 0 | 0 | 0 | 0  | 2  | 6 |
| CYFDPHFISIPC  | 0 | 0 | 0 | 8  | 10 | 7 | CIFDIFMPFISC  | 0 | 0 | 0 | 0  | 4  | 6 |
| CVYDTFVPFIFC  | 0 | 0 | 0 | 0  | 16 | 7 | CIFDIFMPFNLC  | 0 | 0 | 0 | 1  | 4  | 6 |
| CVFDIFLPIFIC  | 0 | 0 | 0 | 0  | 3  | 7 | CIFDIFMPSIFC  | 0 | 0 | 0 | 0  | 0  | 6 |
| CTFDSFLPFIVC  | 0 | 0 | 0 | 0  | 4  | 7 | CIFDLFLPFVIC  | 0 | 0 | 0 | 16 | 25 | 6 |
| CVFDSFLPIIFC  | 0 | 0 | 0 | 0  | 1  | 7 | CIFDTFSPFILC  | 0 | 0 | 0 | 0  | 6  | 6 |
| CVFDVFCPLIFC  | 0 | 1 | 0 | 8  | 15 | 7 | CIFDLFCQFIVC  | 0 | 0 | 0 | 3  | 9  | 6 |
| CVLDVFCPFIFC  | 0 | 0 | 1 | 6  | 22 | 7 | CIFDLFSPFICC  | 0 | 0 | 0 | 2  | 14 | 6 |
| CVNDIFVPIIIC  | 0 | 0 | 0 | 1  | 7  | 7 | CIFDLFSPFTFC  | 0 | 0 | 0 | 4  | 13 | 6 |
| CVYDIFLPIFYC  | 0 | 0 | 0 | 0  | 1  | 7 | CIFDLFVPIFIS  | 0 | 0 | 0 | 0  | 4  | 6 |
| CVYDIFVPIIIC  | 0 | 0 | 0 | 1  | 3  | 7 | CIFDLFVPFNFC  | 0 | 0 | 0 | 0  | 1  | 6 |
| CVYDLFLPIIHC  | 0 | 0 | 0 | 9  | 25 | 7 | CIFDLFYPIFIC  | 0 | 0 | 0 | 8  | 15 | 6 |
| CVYDLFLTFIYC  | 0 | 0 | 0 | 1  | 8  | 7 | CIFDLSVPIFIC  | 1 | 0 | 0 | 0  | 23 | 6 |
| CVYDLFMPFIPI  | 0 | 0 | 0 | 0  | 3  | 7 | CIFDNWLPFINC  | 0 | 0 | 0 | 7  | 17 | 6 |
| CVFDSLLPFICC  | 0 | 0 | 0 | 4  | 23 | 7 | CIFDNWLPFVLC  | 0 | 0 | 0 | 0  | 1  | 6 |
| CVYGLFLPIFYC  | 0 | 0 | 0 | 8  | 26 | 7 | CIFDLIVPIFIC  | 0 | 0 | 0 | 0  | 5  | 6 |
| SLYDSFLPFIFC  | 0 | 0 | 0 | 2  | 2  | 7 | CIFDSFVPFVFC  | 0 | 0 | 0 | 0  | 7  | 6 |
| CTFDTHLPIICC  | 0 | 0 | 2 | 14 | 56 | 7 | CIFDSFVPIFYC  | 0 | 0 | 0 | 0  | 1  | 6 |
| YLFDSFVPIFIC  | 0 | 0 | 0 | 0  | 2  | 7 | CIFDTFLPIFIR  | 0 | 0 | 0 | 1  | 5  | 6 |
| FVYDIFVPIIIC  | 0 | 0 | 0 | 1  | 6  | 7 | CIFDSFFHFIPC  | 0 | 0 | 1 | 2  | 3  | 6 |
| FLYDSFLPFIFC  | 0 | 0 | 0 | 1  | 4  | 7 | CIFDTFCPIFIC  | 0 | 0 | 0 | 0  | 1  | 6 |
| CYFDPHFVPIFIC | 0 | 0 | 0 | 5  | 8  | 7 | CIFDSFYPIFIC  | 0 | 0 | 1 | 4  | 9  | 6 |
| CLFDLFCPLIFC  | 0 | 0 | 2 | 14 | 33 | 7 | CIFDTFLPSILC  | 0 | 1 | 0 | 1  | 1  | 6 |
| CYFDPHFVPIFIC | 0 | 0 | 0 | 4  | 16 | 7 | CIFDSFIPFVFC  | 0 | 0 | 0 | 0  | 10 | 6 |
| CIFDIQMPLIPI  | 0 | 0 | 0 | 0  | 1  | 6 | CIFDSFFPLIPC  | 0 | 0 | 3 | 15 | 10 | 6 |
| CLFDSFLPFIFC  | 0 | 0 | 0 | 6  | 31 | 6 | CIFDSFFPFVLC  | 0 | 0 | 1 | 18 | 32 | 6 |
| CAFDSFLPFIFC  | 0 | 0 | 0 | 0  | 2  | 6 | CIFDNWLPPIYC  | 0 | 0 | 0 | 1  | 9  | 6 |
| CCFDIFLPIIFC  | 0 | 0 | 0 | 7  | 21 | 6 | CLFDIFCPFTLC  | 0 | 0 | 0 | 10 | 18 | 6 |
| CCFDSFLPFIFS  | 0 | 0 | 0 | 1  | 12 | 6 | CIFDIYMPFILC  | 0 | 0 | 0 | 0  | 11 | 6 |
| CCFDSYLPFIIFC | 0 | 0 | 1 | 3  | 3  | 6 | CIFELFFPFILC  | 0 | 0 | 1 | 3  | 22 | 6 |
| CCFDLFLPFIVC  | 0 | 0 | 0 | 0  | 7  | 6 | CIFDTFVPIFIC  | 0 | 0 | 0 | 0  | 4  | 6 |
| CCFGSFLPFIFC  | 0 | 0 | 0 | 5  | 10 | 6 | CIFVTFLPFIIFC | 0 | 0 | 0 | 0  | 10 | 6 |
| CCFNSFLPFIFC  | 0 | 0 | 0 | 3  | 4  | 6 | CIIDIFMPFILC  | 0 | 0 | 0 | 1  | 4  | 6 |
| CFFDLFLPFIFC  | 0 | 0 | 0 | 9  | 19 | 6 | CIIDLFVPIFIC  | 0 | 0 | 0 | 1  | 4  | 6 |
| CDFDLFLPFILC  | 0 | 0 | 0 | 0  | 1  | 6 | CIRDSFVPFILC  | 0 | 0 | 0 | 6  | 15 | 6 |
| CEYDLFLPFIFC  | 0 | 0 | 0 | 0  | 6  | 6 | CIWDSFVPLILC  | 0 | 0 | 0 | 6  | 28 | 6 |
| CFFDLFCPIFIC  | 0 | 0 | 3 | 13 | 44 | 6 | CIYDIFMPFIIFC | 0 | 0 | 0 | 0  | 2  | 6 |
| CFFDLFVPIFIC  | 0 | 0 | 0 | 4  | 10 | 6 | CLFDIFCPFIVC  | 0 | 0 | 0 | 1  | 9  | 6 |
| CFFDPLHLPFVFC | 0 | 0 | 8 | 71 | 67 | 6 | CLFDIFCPFVLC  | 0 | 0 | 0 | 4  | 17 | 6 |
| CGFDSFLPFHIC  | 0 | 0 | 0 | 0  | 4  | 6 | CLFDIFLHFHIC  | 0 | 0 | 0 | 3  | 9  | 6 |
| CIFDIHMMPMPC  | 0 | 0 | 0 | 1  | 6  | 6 | CLFDIFLPIFIS  | 0 | 0 | 0 | 2  | 8  | 6 |

|               |   |   |    |     |     |   |               |   |   |    |    |    |   |
|---------------|---|---|----|-----|-----|---|---------------|---|---|----|----|----|---|
| CLFDIFLPIFY   | 0 | 0 | 0  | 5   | 8   | 6 | CVFDSFWPFIIC  | 0 | 0 | 0  | 0  | 5  | 6 |
| CLFDIFLPSIIC  | 0 | 0 | 0  | 4   | 13  | 6 | CVFDLHLPFIFC  | 0 | 0 | 0  | 2  | 8  | 6 |
| CLFDIFLPYIIC  | 0 | 0 | 0  | 1   | 9   | 6 | CVFDLILPFIFC  | 0 | 0 | 0  | 1  | 3  | 6 |
| CLFDLFCPIFY   | 0 | 0 | 0  | 2   | 5   | 6 | CVFDLWLPFIFC  | 0 | 0 | 0  | 1  | 2  | 6 |
| CLFDLHLLPILC  | 0 | 0 | 2  | 6   | 13  | 6 | CVFDNWLPFILC  | 0 | 0 | 0  | 0  | 4  | 6 |
| CLFDLYCDFIIC  | 0 | 0 | 1  | 6   | 29  | 6 | CVFDNWLPPIFC  | 0 | 0 | 0  | 1  | 7  | 6 |
| CLFDLYCPFIFC  | 0 | 0 | 0  | 3   | 8   | 6 | CVFDFLPIFIIC  | 0 | 0 | 0  | 0  | 0  | 6 |
| CIFDLCCPFIVC  | 0 | 0 | 0  | 0   | 4   | 6 | CVFDSFLPFALC  | 0 | 0 | 1  | 13 | 9  | 6 |
| CLFDPFVVPFVC  | 0 | 1 | 2  | 24  | 20  | 6 | CVFDSFLTIFILC | 0 | 0 | 0  | 1  | 5  | 6 |
| CLFDSFVPIFYC  | 0 | 0 | 0  | 7   | 9   | 6 | CVFDSSLPFIFC  | 0 | 0 | 0  | 0  | 8  | 6 |
| CVFDSFLPFIFS  | 0 | 0 | 0  | 0   | 5   | 6 | CVFDTFIPFIIC  | 0 | 0 | 0  | 0  | 1  | 6 |
| CVFYSFLPFILC  | 0 | 0 | 0  | 0   | 4   | 6 | CVFDTFIPFVIC  | 0 | 0 | 0  | 1  | 10 | 6 |
| CSFDIFLPIFILC | 0 | 0 | 0  | 2   | 4   | 6 | CVFDVFCDFIFC  | 0 | 0 | 0  | 4  | 9  | 6 |
| CVFDLFLSFIFC  | 0 | 0 | 0  | 2   | 2   | 6 | CVFDVLCPIFYC  | 0 | 0 | 0  | 10 | 30 | 6 |
| CLFDTFIPFIIC  | 1 | 0 | 0  | 0   | 4   | 6 | CVFGSFLPFIFC  | 0 | 0 | 0  | 0  | 6  | 6 |
| CLFDTFLPSIFC  | 0 | 0 | 1  | 9   | 15  | 6 | CVFNSFLPFILC  | 0 | 0 | 0  | 0  | 3  | 6 |
| CLFDTFVLFIFC  | 0 | 0 | 0  | 6   | 13  | 6 | CVYDIFVPPFIIC | 0 | 0 | 0  | 1  | 5  | 6 |
| CLFDTMLPFIIC  | 0 | 0 | 1  | 0   | 10  | 6 | CVYDIFMPFIYC  | 0 | 0 | 0  | 0  | 1  | 6 |
| CLNDSFLPFIFC  | 0 | 0 | 0  | 5   | 5   | 6 | CVFDSFLPFNFC  | 0 | 0 | 0  | 0  | 2  | 6 |
| CLYDLFLPFIFC  | 0 | 0 | 0  | 1   | 3   | 6 | YIFDIFMPFILC  | 0 | 0 | 0  | 0  | 3  | 6 |
| CLYDSFLPFITC  | 0 | 0 | 0  | 1   | 8   | 6 | CVYYIFVPPFIIC | 1 | 0 | 1  | 0  | 10 | 6 |
| CLYDSFLPIIIC  | 0 | 0 | 0  | 1   | 9   | 6 | CVFDLVFPFIPC  | 0 | 0 | 0  | 0  | 11 | 6 |
| CLYDSFLPIYIC  | 0 | 0 | 0  | 4   | 10  | 6 | CVFDLFSPIFYC  | 0 | 0 | 0  | 0  | 2  | 6 |
| CLYDSFLSFIFC  | 1 | 0 | 0  | 2   | 7   | 6 | CVYDIFMPFIYC  | 0 | 0 | 0  | 0  | 5  | 6 |
| CLYYSLPFIFC   | 0 | 0 | 0  | 0   | 9   | 6 | CVYDIFVPPFIIC | 0 | 0 | 0  | 0  | 5  | 6 |
| FDLFIPIVLC    | 2 | 0 | 30 | 166 | 123 | 6 | CVYDIFVPPVFC  | 0 | 0 | 0  | 0  | 13 | 6 |
| FDSFLPFIPC    | 0 | 0 | 0  | 0   | 6   | 6 | CVYDIFVPLIFC  | 0 | 0 | 0  | 0  | 7  | 6 |
| YDLFLPFIFC    | 1 | 0 | 0  | 1   | 11  | 6 | CVYDNVFPFIIC  | 0 | 0 | 0  | 1  | 10 | 6 |
| CLYDSFLHFIFC  | 0 | 0 | 0  | 2   | 17  | 6 | CVYDIFVRFIIC  | 0 | 0 | 0  | 0  | 1  | 6 |
| CVFDLFIPIVLC  | 0 | 0 | 0  | 7   | 10  | 6 | CYFDLFLPFIFC  | 0 | 0 | 0  | 0  | 4  | 6 |
| CSFDVFLPFIFC  | 0 | 0 | 0  | 1   | 6   | 6 | CYFDPHFIFIPY  | 0 | 0 | 0  | 0  | 9  | 6 |
| CTFDIFLPIFTFC | 0 | 0 | 0  | 0   | 5   | 6 | CYFDTFLPFIFC  | 0 | 0 | 0  | 3  | 13 | 6 |
| CTFDIFLPIFVFC | 0 | 0 | 0  | 0   | 6   | 6 | CYFNPHFIFIPC  | 0 | 0 | 0  | 2  | 4  | 6 |
| CTFDIFLPLILC  | 0 | 0 | 0  | 9   | 20  | 6 | FVFDLFLPFILC  | 0 | 0 | 0  | 1  | 1  | 6 |
| CTFDIFVPPFIIC | 0 | 0 | 0  | 0   | 1   | 6 | RVFDSFLPFIFC  | 0 | 0 | 0  | 0  | 1  | 6 |
| CTFDILLPFIFC  | 0 | 0 | 0  | 0   | 5   | 6 | CYFDIFLPFILC  | 0 | 0 | 1  | 7  | 28 | 6 |
| CTFDLFIPIFYC  | 0 | 0 | 0  | 2   | 15  | 6 | SIFDIFMPFILC  | 0 | 0 | 0  | 0  | 9  | 6 |
| CTFDLFPVFPVFC | 0 | 0 | 1  | 0   | 9   | 6 | STFDLFLPFIFC  | 0 | 0 | 0  | 4  | 8  | 6 |
| CTFDLFLLFIFC  | 0 | 0 | 0  | 4   | 8   | 6 | CCFDLFFPFIIC  | 0 | 0 | 0  | 2  | 10 | 5 |
| CTFDLFMPFIYC  | 0 | 0 | 0  | 0   | 3   | 6 | CCFDLFPVFC    | 0 | 0 | 21 | 83 | 35 | 5 |
| CTFDLFPPIFYC  | 0 | 0 | 0  | 13  | 10  | 6 | CCFDLHLPVLC   | 0 | 0 | 1  | 9  | 19 | 5 |
| CTFDLFPVPIYC  | 0 | 0 | 0  | 0   | 8   | 6 | CCFDLFFPFIIC  | 0 | 0 | 0  | 8  | 12 | 5 |
| CTFDSWLPFIYC  | 0 | 0 | 0  | 0   | 4   | 6 | CCFDSFLTIFIC  | 0 | 0 | 0  | 0  | 8  | 5 |
| CTFDLFLSFIFC  | 0 | 0 | 0  | 3   | 7   | 6 | CDFDVFCPIFYC  | 0 | 0 | 0  | 2  | 14 | 5 |
| CTFDVFLPFVFC  | 0 | 0 | 0  | 8   | 15  | 6 | CCFDSFLPFITC  | 0 | 0 | 0  | 0  | 2  | 5 |
| CVFDIFIPVCC   | 0 | 0 | 0  | 0   | 9   | 6 | CIFDNHMPFNPC  | 0 | 0 | 0  | 0  | 0  | 5 |
| CLFDSFLPFVLC  | 0 | 0 | 1  | 5   | 32  | 6 | CFYDPLPFIFC   | 0 | 0 | 0  | 6  | 26 | 5 |
| CVFDIFVPIFILC | 0 | 0 | 0  | 0   | 0   | 6 | CIIDIHMPFITC  | 0 | 0 | 0  | 0  | 5  | 5 |
| CVFDLFLHFIFC  | 0 | 0 | 0  | 1   | 5   | 6 | CFDLSFLPFILC  | 0 | 0 | 0  | 1  | 6  | 5 |
| YIFDNWLPFIYC  | 0 | 0 | 0  | 3   | 8   | 6 | CIFDNWFPFIYC  | 0 | 0 | 0  | 2  | 13 | 5 |
| CVYDIFLPFILC  | 0 | 0 | 0  | 0   | 11  | 6 | CLFDSFVTFIFC  | 0 | 0 | 0  | 3  | 6  | 5 |
| CVYDIFAPFIYC  | 0 | 0 | 0  | 0   | 3   | 6 | CAYDLFLPFIFC  | 0 | 0 | 0  | 1  | 3  | 5 |

|               |   |   |   |   |    |   |               |   |   |    |     |    |   |
|---------------|---|---|---|---|----|---|---------------|---|---|----|-----|----|---|
| CHFDTEVPFIFC  | 0 | 0 | 0 | 2 | 5  | 5 | CIWDSFLPFILC  | 0 | 0 | 0  | 0   | 6  | 5 |
| CILDSFVPPFIC  | 0 | 0 | 0 | 1 | 3  | 5 | CIYDIHMPFIPS  | 0 | 0 | 0  | 0   | 3  | 5 |
| CTFDLFVPPFIC  | 0 | 0 | 0 | 0 | 2  | 5 | CIYDIHMPILPC  | 0 | 0 | 0  | 0   | 2  | 5 |
| CLFDSYVPPFIC  | 0 | 0 | 0 | 2 | 16 | 5 | CIYDIHMPYIPC  | 0 | 0 | 0  | 1   | 0  | 5 |
| CIFDIFIPFIC   | 0 | 0 | 0 | 0 | 5  | 5 | CIYDTFLPFILC  | 0 | 0 | 0  | 0   | 2  | 5 |
| CIFDIFMPLIIC  | 0 | 0 | 0 | 0 | 3  | 5 | CLFDIFCPFIHC  | 0 | 0 | 1  | 3   | 10 | 5 |
| CIFDNHMPYIPC  | 0 | 0 | 0 | 0 | 1  | 5 | CLFDIFLPPFNFC | 0 | 0 | 0  | 2   | 2  | 5 |
| CIFDIFMPYILC  | 0 | 0 | 0 | 1 | 7  | 5 | CLFDIFLPIIFC  | 0 | 0 | 0  | 1   | 8  | 5 |
| CIFDIHMPFIPW  | 0 | 0 | 0 | 0 | 1  | 5 | CLFDIFLPIIIC  | 0 | 0 | 0  | 2   | 2  | 5 |
| CIFDIHMPILITC | 0 | 0 | 0 | 0 | 0  | 5 | CLFDIFLTFIFC  | 0 | 0 | 0  | 2   | 3  | 5 |
| CIFDIHMTFIHC  | 0 | 0 | 0 | 0 | 3  | 5 | CLFDIFWPFIPC  | 0 | 0 | 0  | 0   | 0  | 5 |
| CIFDIHTPFTPC  | 0 | 0 | 0 | 0 | 1  | 5 | CLFDLYPFIVC   | 0 | 0 | 0  | 6   | 10 | 5 |
| CIFDIWLPFIFC  | 0 | 0 | 0 | 0 | 4  | 5 | CLFDLHMPFIFC  | 0 | 0 | 0  | 1   | 7  | 5 |
| CIFDLFCPFIEC  | 0 | 0 | 0 | 2 | 11 | 5 | CLFDLYLPFILC  | 0 | 1 | 24 | 57  | 53 | 5 |
| CIFDLFCPFNVC  | 0 | 0 | 0 | 1 | 9  | 5 | CLFDLYVPFVFC  | 0 | 0 | 0  | 1   | 6  | 5 |
| CIFDLFVPPFIFY | 0 | 0 | 0 | 3 | 7  | 5 | CLFDPFLPFIPC  | 0 | 0 | 1  | 28  | 23 | 5 |
| CIFDLFVPPVLC  | 0 | 0 | 0 | 0 | 12 | 5 | CLFDSFIPFIIC  | 0 | 0 | 0  | 0   | 3  | 5 |
| CIFDLWLPPFIC  | 0 | 0 | 0 | 0 | 2  | 5 | CLFDSFLPFITC  | 0 | 0 | 0  | 0   | 11 | 5 |
| CIFDLWLPPFILC | 0 | 0 | 0 | 0 | 1  | 5 | CLFDSFLPFNLIC | 0 | 0 | 0  | 2   | 8  | 5 |
| CILDLCFPIIC   | 0 | 0 | 0 | 0 | 1  | 5 | CLFDSFPPIILC  | 0 | 0 | 1  | 9   | 11 | 5 |
| CIFNIFMPFILC  | 0 | 0 | 0 | 1 | 3  | 5 | CIFDNWLPPFIMC | 0 | 0 | 0  | 0   | 2  | 5 |
| CILDFTLPFILC  | 0 | 0 | 0 | 0 | 4  | 5 | CLFDSFVPPFIVC | 0 | 0 | 0  | 5   | 19 | 5 |
| CIFDNWLPPFLCC | 0 | 0 | 0 | 0 | 17 | 5 | CIIDTFLPFIIC  | 0 | 0 | 0  | 0   | 0  | 5 |
| CIFYIHMPFITC  | 0 | 0 | 0 | 0 | 1  | 5 | CLFDLSLPPFIPC | 0 | 2 | 25 | 145 | 55 | 5 |
| CIFDNWLPPFNFC | 0 | 0 | 0 | 0 | 0  | 5 | CLFDTFLPPFNFC | 0 | 0 | 0  | 0   | 6  | 5 |
| CIFDNWLPLIIC  | 0 | 0 | 0 | 0 | 0  | 5 | CCYDSFLPFIFC  | 0 | 0 | 0  | 1   | 10 | 5 |
| CIFDNWLQFIYC  | 0 | 0 | 0 | 1 | 9  | 5 | CVLDSFLPFIPC  | 0 | 0 | 0  | 0   | 4  | 5 |
| CIFDPFLSFIPC  | 0 | 0 | 0 | 6 | 15 | 5 | CTFDIFLPFIRC  | 0 | 0 | 1  | 7   | 23 | 5 |
| CIFDSFCPIIC   | 0 | 0 | 0 | 0 | 3  | 5 | CVFDLFLPFIFY  | 0 | 0 | 0  | 2   | 17 | 5 |
| CIFDSFFPFITC  | 0 | 0 | 1 | 8 | 21 | 5 | CLFDTEVPSIFC  | 0 | 0 | 0  | 9   | 14 | 5 |
| CIFDSFIPFIPC  | 0 | 0 | 0 | 2 | 6  | 5 | CLFDTSVPPFIFC | 0 | 0 | 0  | 14  | 23 | 5 |
| CIFDSFLPFIVC  | 0 | 0 | 0 | 2 | 2  | 5 | CLFDVFCPIILC  | 0 | 0 | 1  | 7   | 12 | 5 |
| CIFDSFVPPFILC | 0 | 0 | 0 | 0 | 6  | 5 | CLFEIFLPPFIFC | 0 | 0 | 0  | 2   | 6  | 5 |
| CIFDSFVPPFIPC | 0 | 0 | 0 | 0 | 5  | 5 | CLFNTPFPFIFC  | 0 | 0 | 0  | 3   | 7  | 5 |
| CIFDNWPPFIFC  | 0 | 0 | 0 | 0 | 7  | 5 | CLLDSFLPFILC  | 0 | 0 | 0  | 11  | 22 | 5 |
| CIFDSWLPPYILC | 0 | 0 | 0 | 3 | 9  | 5 | CLLDTFLPFIFC  | 0 | 0 | 0  | 13  | 24 | 5 |
| CIFDTHLPPFIYC | 0 | 0 | 0 | 0 | 3  | 5 | CLSDIFLPFIFC  | 0 | 0 | 1  | 8   | 12 | 5 |
| CIFGIFMPFIPC  | 0 | 0 | 0 | 1 | 2  | 5 | CLSDFSFLPFIFC | 0 | 0 | 0  | 0   | 4  | 5 |
| CIFDTFIPFIFC  | 0 | 0 | 0 | 0 | 1  | 5 | CLSDTFLPFIFC  | 0 | 0 | 0  | 8   | 12 | 5 |
| CIFELSFPPFIC  | 0 | 0 | 1 | 8 | 15 | 5 | CLWDSFVPPFIFC | 0 | 0 | 0  | 0   | 0  | 5 |
| CIFDTHMPFIFC  | 0 | 0 | 0 | 0 | 5  | 5 | CLYDSFLPFIFR  | 0 | 0 | 0  | 1   | 8  | 5 |
| CIFDTYMPFIFC  | 0 | 0 | 0 | 0 | 2  | 5 | CLYDSLLPFIIC  | 0 | 0 | 0  | 1   | 8  | 5 |
| CIFDTHIPFIPC  | 0 | 0 | 0 | 0 | 2  | 5 | CLYESFLPFIFC  | 0 | 0 | 1  | 2   | 6  | 5 |
| CIFDTFMPFICC  | 0 | 0 | 0 | 0 | 0  | 5 | CLYNSFLPFIFC  | 0 | 1 | 0  | 7   | 11 | 5 |
| CIFDTFLRFIFC  | 0 | 0 | 0 | 0 | 1  | 5 | FDLFLPFIFC    | 0 | 0 | 2  | 23  | 21 | 5 |
| CIFDTFLPFILY  | 0 | 0 | 0 | 0 | 2  | 5 | FDSFLPFILC    | 0 | 0 | 0  | 3   | 6  | 5 |
| CIFGIFMPFILC  | 0 | 0 | 1 | 4 | 8  | 5 | FDSFLPPVLC    | 2 | 0 | 1  | 4   | 7  | 5 |
| CIFDNWLPPFIYY | 0 | 0 | 0 | 4 | 20 | 5 | CNFDIFMPFILC  | 0 | 0 | 0  | 0   | 6  | 5 |
| CIFDSLFPFIFC  | 0 | 0 | 1 | 3 | 4  | 5 | CNFDIHKPFIPC  | 0 | 0 | 0  | 0   | 1  | 5 |
| CINDIHKPFIPC  | 0 | 0 | 0 | 0 | 2  | 5 | CNFDIHMPFITC  | 0 | 0 | 0  | 0   | 1  | 5 |
| CIIDHMPFIPS   | 0 | 0 | 0 | 0 | 0  | 5 | CNFDIHMPFNPC  | 0 | 0 | 0  | 0   | 5  | 5 |
| CINDIHMPFIFC  | 0 | 0 | 0 | 0 | 2  | 5 | CNFDTFLPFILC  | 0 | 0 | 0  | 0   | 1  | 5 |

|              |   |   |   |    |    |   |
|--------------|---|---|---|----|----|---|
| CLFGSFLPFIFC | 0 | 0 | 0 | 0  | 2  | 5 |
| CVFDLFLPFIFC | 0 | 0 | 0 | 2  | 12 | 5 |
| CVFDIFVFPVLC | 1 | 0 | 0 | 3  | 14 | 5 |
| CVLDLFLPFIFC | 0 | 0 | 0 | 3  | 4  | 5 |
| CTFDLFLRFIFC | 0 | 0 | 0 | 0  | 4  | 5 |
| CTFDLFLPFIFC | 0 | 0 | 0 | 0  | 2  | 5 |
| CTFDSFFPFIFC | 0 | 0 | 1 | 4  | 11 | 5 |
| CTFDSFFPFIFC | 0 | 0 | 0 | 2  | 4  | 5 |
| CTFDNWLPFIFC | 0 | 0 | 0 | 0  | 3  | 5 |
| CTFDLFLPFIFC | 0 | 1 | 0 | 0  | 5  | 5 |
| CTFDLFLHFIFC | 0 | 0 | 0 | 2  | 17 | 5 |
| CTFDLFLPLIIC | 0 | 0 | 0 | 0  | 0  | 5 |
| CTFDLFLPIIIC | 0 | 0 | 0 | 8  | 5  | 5 |
| CTFDLFLPFIMC | 0 | 0 | 0 | 0  | 8  | 5 |
| CTFDIFVPFIFC | 0 | 0 | 0 | 0  | 5  | 5 |
| CTFDTHCPFIFC | 0 | 0 | 0 | 1  | 9  | 5 |
| CTFDLFLPFIFC | 0 | 0 | 0 | 0  | 7  | 5 |
| CVFDIFVPFIFC | 0 | 0 | 0 | 7  | 21 | 5 |
| CTFDLFLPFIFC | 0 | 0 | 0 | 1  | 9  | 5 |
| CTFDVFPFIFC  | 0 | 0 | 0 | 4  | 11 | 5 |
| CTFNTLFPFIFC | 0 | 0 | 0 | 1  | 12 | 5 |
| CTFYTLFPFIFC | 0 | 0 | 0 | 0  | 4  | 5 |
| CTIDTLFPFIFC | 0 | 0 | 0 | 2  | 12 | 5 |
| CVCDLFLPFIFC | 0 | 0 | 0 | 0  | 0  | 5 |
| CVFDGFLPFIFC | 0 | 0 | 0 | 1  | 6  | 5 |
| CVFDIFVPFIFC | 0 | 0 | 0 | 0  | 2  | 5 |
| CVFDLFLPFIFC | 0 | 0 | 0 | 0  | 4  | 5 |
| CVFDIFVPLVLC | 0 | 0 | 1 | 5  | 11 | 5 |
| CPFDLFLPFIFC | 0 | 0 | 0 | 0  | 4  | 5 |
| CTFDVFLPSIFC | 0 | 0 | 0 | 4  | 4  | 5 |
| RIFDLFCPFIFC | 0 | 0 | 0 | 0  | 5  | 5 |
| CVYDIFVTFIFC | 0 | 0 | 0 | 3  | 18 | 5 |
| CVYDIFVPIIY  | 0 | 0 | 0 | 1  | 17 | 5 |
| CVFDLFPYIILC | 0 | 0 | 0 | 12 | 17 | 5 |
| CVFDSCLPFIFC | 0 | 0 | 0 | 0  | 6  | 5 |
| CVFDSFLPFIFC | 0 | 0 | 0 | 0  | 1  | 5 |
| CVFDSFLPFIFC | 0 | 0 | 0 | 1  | 2  | 5 |
| CVFDSFLPFNLC | 0 | 0 | 0 | 1  | 12 | 5 |
| CVFDSFLPFIFC | 0 | 0 | 0 | 0  | 0  | 5 |
| CVFDSFLPIIIC | 0 | 0 | 0 | 1  | 4  | 5 |
| CVFDSFLPVIIC | 0 | 0 | 0 | 0  | 3  | 5 |
| CVFDSFLQFIFC | 0 | 0 | 0 | 0  | 8  | 5 |
| CVFDSFLTLIIC | 0 | 0 | 0 | 0  | 2  | 5 |
| CVFDSFVPFIFC | 0 | 0 | 0 | 0  | 0  | 5 |
| CVFDSFVPFVFC | 0 | 0 | 0 | 1  | 9  | 5 |
| CVFDSILPFIFC | 0 | 0 | 0 | 2  | 3  | 5 |
| CVFDSLLPLIIC | 0 | 0 | 0 | 0  | 5  | 5 |
| CVFDSLLPFVLC | 0 | 0 | 0 | 4  | 11 | 5 |
| CVFDSYLPFIFC | 0 | 0 | 0 | 1  | 4  | 5 |
| CVFDSYLPVLC  | 0 | 0 | 0 | 2  | 4  | 5 |
| CVFDLFPFIFC  | 0 | 0 | 0 | 2  | 7  | 5 |
| CVFDLFPFIFC  | 0 | 0 | 0 | 3  | 4  | 5 |

|              |   |   |   |   |    |   |
|--------------|---|---|---|---|----|---|
| CVFDVFCPFTFC | 0 | 0 | 1 | 8 | 24 | 5 |
| CVFELFLPFIFC | 0 | 0 | 0 | 0 | 3  | 5 |
| CVFELYTPFIFC | 0 | 0 | 0 | 2 | 13 | 5 |
| CVFDLFLPLIIC | 0 | 0 | 0 | 0 | 1  | 5 |
| CVFNLFLPFIFC | 0 | 0 | 0 | 1 | 5  | 5 |
| CVFDLMPFIFC  | 0 | 0 | 0 | 1 | 9  | 5 |
| CVFDSWLPFIFC | 0 | 0 | 0 | 0 | 3  | 5 |
| CVYDLFLPFIFC | 0 | 0 | 0 | 1 | 16 | 5 |
| CYFGPHFIFIC  | 0 | 0 | 0 | 3 | 12 | 5 |
| CVYDLFLPFIFC | 0 | 0 | 0 | 1 | 11 | 5 |
| CVYDIIVPFIFC | 0 | 0 | 0 | 1 | 0  | 5 |
| YVFDLFLPFIFC | 0 | 0 | 0 | 2 | 3  | 5 |
| CVYDLFLPFVLC | 0 | 0 | 0 | 1 | 13 | 5 |
| CVYDLFSPFIFC | 0 | 0 | 0 | 0 | 9  | 5 |
| CVYDLILPFIFC | 0 | 0 | 0 | 2 | 8  | 5 |
| CYFAPHFIFIC  | 0 | 0 | 0 | 1 | 4  | 5 |
| CYFDHHPFIFC  | 0 | 0 | 0 | 1 | 5  | 5 |
| CYFDPHFIFIC  | 0 | 0 | 0 | 1 | 8  | 5 |
| CVYEIFVPIIC  | 0 | 0 | 0 | 2 | 10 | 5 |
| CYFVPHFIFIC  | 0 | 0 | 1 | 5 | 3  | 5 |
| SVYDIFVPIIC  | 0 | 0 | 0 | 0 | 6  | 5 |
| SYFDPHFIFIC  | 0 | 0 | 0 | 2 | 5  | 5 |
| RYFDPHFIFIC  | 0 | 0 | 0 | 0 | 6  | 5 |
| RVFDLFLPFIFC | 0 | 0 | 0 | 0 | 6  | 5 |
| RVYDLFLPFIFC | 0 | 0 | 0 | 1 | 7  | 5 |
| CLFDLFCPFIFC | 0 | 0 | 0 | 1 | 5  | 5 |
| GVFDSFLPFIFC | 0 | 0 | 0 | 0 | 5  | 5 |
| FTFDLFLPFIFC | 0 | 0 | 0 | 3 | 10 | 5 |
| SLFDLFLPFIFC | 0 | 0 | 0 | 1 | 6  | 5 |
| CLFDLFLPFIFC | 0 | 0 | 0 | 0 | 0  | 4 |
| CCFDSFFPFIFC | 0 | 0 | 0 | 2 | 3  | 4 |
| CAFDFIFVLC   | 0 | 0 | 1 | 2 | 11 | 4 |
| CEFDSFLPFVLC | 0 | 0 | 0 | 1 | 10 | 4 |
| CAFDTHPFITC  | 0 | 0 | 0 | 4 | 10 | 4 |
| CCFDLFLPFIFC | 0 | 0 | 0 | 0 | 10 | 4 |
| CCFDSFLPLVIC | 0 | 0 | 0 | 3 | 5  | 4 |
| CCFDSFLPFIFC | 0 | 0 | 0 | 4 | 8  | 4 |
| CCFDSFLPLCC  | 0 | 0 | 0 | 0 | 7  | 4 |
| CCFDSFLPFNFC | 0 | 0 | 0 | 1 | 7  | 4 |
| CCFDSFLSIFC  | 0 | 0 | 0 | 4 | 8  | 4 |
| CCFDSFQPFIFC | 0 | 0 | 0 | 4 | 6  | 4 |
| CCFYSLPFIFC  | 0 | 0 | 0 | 0 | 3  | 4 |
| CCIDSFLPFIFC | 0 | 0 | 0 | 2 | 5  | 4 |
| CCLDFLPFIFC  | 0 | 0 | 0 | 2 | 5  | 4 |
| CILDIHMPFIFC | 0 | 0 | 0 | 0 | 7  | 4 |
| CEFDSFLPFIFC | 0 | 0 | 0 | 0 | 1  | 4 |
| CILDIHMPFTPC | 0 | 0 | 0 | 0 | 2  | 4 |
| CILDLCFIFC   | 0 | 0 | 0 | 0 | 2  | 4 |
| CIFETFLPFIFC | 0 | 0 | 0 | 0 | 0  | 4 |
| CIFDIHMTIIPC | 0 | 0 | 0 | 0 | 0  | 4 |
| CDYDIFVPIIIC | 0 | 0 | 0 | 0 | 0  | 4 |
| CIFDIHMPFIFC | 0 | 0 | 0 | 0 | 4  | 4 |

|               |   |   |    |     |    |   |
|---------------|---|---|----|-----|----|---|
| CFDFIFMPFILC  | 0 | 0 | 0  | 3   | 6  | 4 |
| CFFDIHMPFITC  | 0 | 0 | 0  | 0   | 0  | 4 |
| CFFDLFCPFIVC  | 0 | 0 | 0  | 2   | 10 | 4 |
| CFFDLFLPFIPC  | 0 | 0 | 0  | 0   | 6  | 4 |
| CFFDLFSPFIFC  | 0 | 0 | 0  | 0   | 1  | 4 |
| CFFDSFFPFIFC  | 0 | 0 | 22 | 66  | 40 | 4 |
| CFFDSLWPFVAVC | 0 | 0 | 26 | 124 | 84 | 4 |
| CVFDLFLTFIFC  | 0 | 0 | 0  | 1   | 10 | 4 |
| CHFDFLFPFIFC  | 0 | 0 | 0  | 4   | 11 | 4 |
| CFYDLLLPFIFC  | 0 | 0 | 0  | 12  | 17 | 4 |
| CIFDIHMPEVIC  | 0 | 0 | 0  | 0   | 3  | 4 |
| CHFDFLFCPFIFC | 0 | 0 | 0  | 3   | 2  | 4 |
| CHFDSFVPFIFC  | 0 | 0 | 0  | 8   | 11 | 4 |
| CIFDIHMPSILC  | 0 | 0 | 0  | 1   | 3  | 4 |
| CLFDIYLPFIFC  | 0 | 0 | 0  | 2   | 4  | 4 |
| CLFDLFCHFIFC  | 0 | 0 | 1  | 4   | 7  | 4 |
| CVFDLFLPFVYC  | 1 | 0 | 0  | 0   | 3  | 4 |
| CVFDLFLPIIFC  | 0 | 0 | 0  | 0   | 7  | 4 |
| CIFYIHMTFIPC  | 0 | 0 | 0  | 1   | 2  | 4 |
| CIFDIHMPPNPS  | 0 | 0 | 0  | 0   | 2  | 4 |
| CIFDIHMPPNLC  | 0 | 0 | 0  | 0   | 0  | 4 |
| CIFAIHMPPFIPC | 1 | 0 | 0  | 1   | 1  | 4 |
| CIFDAFLPFIFC  | 0 | 0 | 0  | 0   | 1  | 4 |
| CIFDIFMPFIFC  | 0 | 0 | 0  | 0   | 8  | 4 |
| CIFDIFMPFIMC  | 0 | 0 | 0  | 1   | 3  | 4 |
| CIFDIFMPFVPC  | 0 | 0 | 0  | 0   | 4  | 4 |
| CIFDIFMPIILC  | 0 | 0 | 0  | 0   | 1  | 4 |
| CIFDIFMPLIFC  | 0 | 0 | 0  | 0   | 3  | 4 |
| CIFDIFMTFILC  | 0 | 0 | 0  | 2   | 4  | 4 |
| CIFDIFTPFIPC  | 0 | 0 | 0  | 1   | 6  | 4 |
| CIFDIHKLIPIC  | 0 | 0 | 0  | 0   | 1  | 4 |
| CIFDIHLPFIFC  | 0 | 0 | 0  | 1   | 4  | 4 |
| CIFDIHLPFIYC  | 0 | 0 | 0  | 0   | 2  | 4 |
| CIFDIHMHFITC  | 0 | 0 | 0  | 0   | 5  | 4 |
| CIFDIHMHFTPC  | 0 | 0 | 0  | 0   | 0  | 4 |
| CIFDIHMPPNHC  | 0 | 0 | 0  | 0   | 1  | 4 |
| CIIDTFLPFIYC  | 0 | 0 | 0  | 1   | 0  | 4 |
| CIFDINMHFIPC  | 0 | 0 | 0  | 0   | 2  | 4 |
| CIFNLVVPFIFC  | 0 | 0 | 0  | 1   | 3  | 4 |
| CIFDSFMPFILC  | 0 | 0 | 0  | 0   | 4  | 4 |
| CIFDLFCPFVIC  | 0 | 0 | 0  | 1   | 8  | 4 |
| CIFDNFMPFILC  | 0 | 0 | 0  | 0   | 2  | 4 |
| CIFDILMPFIFC  | 0 | 0 | 0  | 1   | 2  | 4 |
| CIFDTFLPLIPC  | 0 | 0 | 0  | 0   | 2  | 4 |
| CIFDINKPFITC  | 0 | 0 | 0  | 0   | 0  | 4 |
| CIFDINMPFNPC  | 0 | 0 | 0  | 0   | 0  | 4 |
| CIFDLFCLFIVC  | 0 | 0 | 0  | 2   | 17 | 4 |
| CIFDLFCPFIVY  | 0 | 0 | 0  | 1   | 10 | 4 |
| CIFDLFCPFVLC  | 0 | 0 | 0  | 0   | 3  | 4 |
| CIFDLFCPFVVC  | 0 | 0 | 0  | 8   | 19 | 4 |
| CIFDLFCPIIVC  | 0 | 0 | 0  | 2   | 4  | 4 |
| CIFDLFCPLIFC  | 0 | 0 | 0  | 0   | 1  | 4 |

|              |   |   |   |   |    |   |
|--------------|---|---|---|---|----|---|
| CIFDLFFPFTPC | 0 | 0 | 0 | 1 | 10 | 4 |
| CIFDLFLPFVCC | 0 | 0 | 0 | 0 | 4  | 4 |
| CIFDLFRPFIFC | 0 | 0 | 0 | 0 | 1  | 4 |
| CIFDLFVPFIFC | 0 | 0 | 0 | 0 | 0  | 4 |
| CIFDLFVPLIIC | 0 | 0 | 0 | 0 | 1  | 4 |
| CIFDNWIPFIYC | 0 | 0 | 0 | 3 | 7  | 4 |
| CIFDTFLPFIYS | 0 | 0 | 0 | 0 | 4  | 4 |
| CIFDLSCPFIYC | 0 | 0 | 1 | 4 | 13 | 4 |
| CIFDTFLPFVFC | 0 | 0 | 0 | 0 | 2  | 4 |
| CIFDNWLPFVIC | 0 | 0 | 0 | 0 | 0  | 4 |
| CIFDSFIPFVIC | 0 | 0 | 0 | 0 | 0  | 4 |
| CIFDNWLSFIYC | 0 | 0 | 1 | 1 | 8  | 4 |
| CIFDNWPPFIPC | 0 | 0 | 0 | 1 | 2  | 4 |
| CIFDPFSPFIFC | 0 | 0 | 0 | 7 | 6  | 4 |
| CIFDPFVPFIIC | 0 | 0 | 0 | 0 | 1  | 4 |
| CIFDNWLLFIFC | 0 | 0 | 0 | 0 | 2  | 4 |
| CIFDSFFPFVVC | 0 | 0 | 0 | 0 | 10 | 4 |
| CIFDSFFPLIFC | 0 | 0 | 2 | 4 | 13 | 4 |
| CIFDTFLPCIFC | 0 | 0 | 0 | 0 | 1  | 4 |
| CIFDSFMPFIPC | 0 | 0 | 0 | 0 | 1  | 4 |
| CIFDSLFPFIPC | 0 | 0 | 1 | 7 | 10 | 4 |
| CIFDSSFPFIFC | 0 | 0 | 0 | 3 | 5  | 4 |
| CIFDSSFPFIPC | 0 | 0 | 2 | 7 | 10 | 4 |
| CIFDTFLPFIIS | 0 | 0 | 0 | 0 | 1  | 4 |
| CIFDTFLPFINC | 0 | 0 | 0 | 0 | 1  | 4 |
| CIFDTFLPFIRC | 0 | 0 | 0 | 0 | 3  | 4 |
| CIFDLFVPYIFC | 0 | 0 | 0 | 3 | 10 | 4 |
| CIFDMFVPFIIC | 0 | 0 | 0 | 0 | 0  | 4 |
| CIFHTFLPFIFC | 0 | 0 | 0 | 0 | 1  | 4 |
| CLFDIFVPFIPC | 0 | 0 | 0 | 0 | 1  | 4 |
| CIFDIHMTLIPC | 0 | 0 | 0 | 0 | 2  | 4 |
| CISDNWLPFIFC | 0 | 0 | 0 | 0 | 5  | 4 |
| CLDFTLFPFIYC | 0 | 0 | 0 | 0 | 1  | 4 |
| CIFDTHMPLIPC | 0 | 0 | 0 | 0 | 0  | 4 |
| CIFDTHTPFIPC | 0 | 0 | 0 | 1 | 1  | 4 |
| CIFDTLPPFIFC | 0 | 0 | 0 | 0 | 2  | 4 |
| CIFDTLLPFILC | 0 | 0 | 0 | 0 | 11 | 4 |
| CIFDTLLPFIYC | 0 | 0 | 0 | 1 | 5  | 4 |
| CIFDTSLPFIFC | 0 | 0 | 0 | 0 | 4  | 4 |
| CIFDTSLPFIPC | 0 | 0 | 0 | 0 | 1  | 4 |
| CIFDTYLPFIIC | 0 | 0 | 0 | 0 | 2  | 4 |
| CIFDVLPFIYC  | 0 | 0 | 0 | 0 | 3  | 4 |
| CIFDTFSPFIYC | 0 | 0 | 0 | 0 | 3  | 4 |
| CIFELFFPFTPC | 0 | 0 | 1 | 7 | 10 | 4 |
| CIFGNWLPFIFC | 0 | 0 | 0 | 0 | 3  | 4 |
| CIFGTFLPFIFC | 0 | 0 | 0 | 0 | 0  | 4 |
| CLFDILCPFIFC | 0 | 0 | 0 | 0 | 3  | 4 |
| CLFDIFLSFIIC | 0 | 0 | 0 | 1 | 1  | 4 |
| CIFDNLLPFIYC | 0 | 0 | 0 | 1 | 9  | 4 |
| CLFDIFLPFIY  | 0 | 0 | 0 | 1 | 6  | 4 |
| CIFDTFLPLIYC | 0 | 0 | 0 | 0 | 1  | 4 |
| CLFDFFCPFIFC | 0 | 0 | 0 | 4 | 3  | 4 |



|               |   |   |    |    |    |   |
|---------------|---|---|----|----|----|---|
| CIFDTHMPFIPY  | 0 | 0 | 0  | 0  | 2  | 4 |
| CISDSFFPFIFC  | 0 | 0 | 0  | 2  | 2  | 4 |
| CIWDPFVPFIFC  | 0 | 0 | 0  | 0  | 4  | 4 |
| CIYDIHMPFNPC  | 0 | 0 | 0  | 0  | 1  | 4 |
| CIYDIHMTFIPC  | 0 | 0 | 0  | 0  | 0  | 4 |
| CIYDIQMPPFIPC | 0 | 0 | 0  | 0  | 0  | 4 |
| CIYDNWLPFILC  | 0 | 0 | 0  | 0  | 1  | 4 |
| CIYDSFLPFILC  | 0 | 0 | 0  | 1  | 0  | 4 |
| CIYDTYLPFIFC  | 0 | 0 | 0  | 0  | 1  | 4 |
| CLFDIFCPFICC  | 0 | 0 | 0  | 0  | 6  | 4 |
| CLFDIFFPFIFC  | 0 | 0 | 0  | 4  | 11 | 4 |
| CLFDIFFPFVLC  | 0 | 1 | 20 | 60 | 44 | 4 |
| CLFDIFLHFIFC  | 0 | 0 | 0  | 4  | 8  | 4 |
| CLFDIFLPHFIC  | 0 | 0 | 0  | 2  | 2  | 4 |
| CLFDIFLPHFIS  | 0 | 0 | 0  | 0  | 9  | 4 |
| CVFDLFLPLIYC  | 0 | 0 | 0  | 1  | 2  | 4 |
| CYFDPNFIFIPC  | 0 | 0 | 0  | 2  | 3  | 4 |
| CVFDLWLPFTFC  | 0 | 0 | 0  | 0  | 5  | 4 |
| CLFDLFEFVFC   | 0 | 0 | 0  | 5  | 15 | 4 |
| CLFDLFVPAFC   | 0 | 0 | 2  | 9  | 15 | 4 |
| CLFDLSCPFIIC  | 1 | 0 | 1  | 19 | 18 | 4 |
| CLFDPFLSFITC  | 0 | 0 | 1  | 11 | 6  | 4 |
| CLFDSFHPFILC  | 0 | 0 | 0  | 7  | 7  | 4 |
| CLSDLFVPAFVFC | 0 | 0 | 0  | 7  | 6  | 4 |
| CLFDSFIPFILC  | 0 | 0 | 0  | 0  | 4  | 4 |
| CLFDSFLPFTFC  | 0 | 0 | 0  | 2  | 7  | 4 |
| CLFDSFMPFIIC  | 0 | 0 | 0  | 0  | 3  | 4 |
| CLFDSFVPAFIS  | 0 | 0 | 0  | 3  | 10 | 4 |
| CLFDSFVPAFIC  | 0 | 0 | 0  | 1  | 5  | 4 |
| CLFDSFVPAFNFC | 0 | 0 | 0  | 0  | 5  | 4 |
| CLFDSFVPAFVSC | 0 | 0 | 1  | 12 | 18 | 4 |
| CLFDSFVSAFIC  | 0 | 0 | 0  | 4  | 2  | 4 |
| CLFDSILPFILC  | 0 | 0 | 0  | 0  | 2  | 4 |
| CLFDSLLPFIPIC | 0 | 0 | 0  | 2  | 20 | 4 |
| CLFDSFIPFIPIC | 0 | 0 | 0  | 0  | 0  | 4 |
| CLFDLFFPFITC  | 0 | 0 | 3  | 8  | 11 | 4 |
| CLFDLFCFIFC   | 0 | 0 | 0  | 1  | 1  | 4 |
| CLFDLFCPFIFIS | 0 | 0 | 0  | 1  | 8  | 4 |
| CLFDTFLPLIIC  | 0 | 0 | 0  | 1  | 1  | 4 |
| CLFDTFLPYIFC  | 0 | 0 | 0  | 0  | 4  | 4 |
| CLFDTFVPAFLCC | 0 | 0 | 0  | 0  | 5  | 4 |
| CLFDTFVQFIFC  | 0 | 0 | 0  | 1  | 9  | 4 |
| CLFDVFCDLIFC  | 0 | 0 | 0  | 15 | 6  | 4 |
| CLFDVFCPFIFC  | 0 | 0 | 0  | 0  | 10 | 4 |
| CLFDYFVPAFIFC | 0 | 0 | 0  | 2  | 6  | 4 |
| CLFGTFVPAFIFC | 0 | 0 | 0  | 7  | 13 | 4 |
| CLFNSFVPAFIFC | 0 | 0 | 0  | 4  | 4  | 4 |
| CLIDIFLPHFIC  | 0 | 0 | 0  | 0  | 4  | 4 |
| CLLDSFLPFIFC  | 0 | 0 | 0  | 0  | 1  | 4 |
| CLFDTFCPFILC  | 0 | 0 | 0  | 6  | 24 | 4 |
| CLFDLFAFVFC   | 0 | 0 | 0  | 9  | 19 | 4 |
| CLFDSWLPFIIC  | 0 | 0 | 0  | 0  | 2  | 4 |

|               |   |   |    |    |    |   |
|---------------|---|---|----|----|----|---|
| CLFDSSLPFIFC  | 0 | 0 | 0  | 3  | 6  | 4 |
| CTFDSSLPFIFC  | 0 | 0 | 0  | 1  | 11 | 4 |
| CLFDSFVPLVFC  | 0 | 0 | 5  | 10 | 11 | 4 |
| CSFDSFLPFILC  | 0 | 0 | 0  | 6  | 12 | 4 |
| CLFDTFLPFIY   | 0 | 0 | 0  | 4  | 2  | 4 |
| CTFDIFLPFTLC  | 0 | 0 | 1  | 5  | 10 | 4 |
| CLYDNLLPFIFC  | 0 | 0 | 2  | 5  | 36 | 4 |
| CLYDSFFPFIFC  | 0 | 0 | 0  | 3  | 6  | 4 |
| CLYDSFLAFIFC  | 0 | 0 | 0  | 0  | 1  | 4 |
| CLYDFLPPFIFC  | 0 | 1 | 24 | 52 | 35 | 4 |
| CLYDSILPFIFC  | 0 | 0 | 0  | 3  | 14 | 4 |
| CLYDSVLPFIFC  | 0 | 0 | 0  | 0  | 2  | 4 |
| CLYDTFVPAFIFC | 0 | 0 | 0  | 2  | 9  | 4 |
| CNFDIHMPFIPS  | 0 | 0 | 0  | 0  | 0  | 4 |
| CNFDINMPFITC  | 0 | 0 | 0  | 0  | 0  | 4 |
| CLYDSFLPAFNFC | 0 | 0 | 1  | 3  | 8  | 4 |
| CNFDLVPAFIFC  | 0 | 0 | 0  | 3  | 7  | 4 |
| CVFDLWLPVFC   | 0 | 0 | 0  | 0  | 8  | 4 |
| CPFDFLPFILC   | 0 | 0 | 0  | 0  | 6  | 4 |
| CTFDISLPFILC  | 0 | 0 | 0  | 4  | 9  | 4 |
| CTFDLYLPFIYC  | 0 | 0 | 0  | 1  | 1  | 4 |
| CTFALFLPFIFC  | 0 | 0 | 0  | 0  | 2  | 4 |
| CTFDFFLPFIFC  | 1 | 0 | 0  | 5  | 15 | 4 |
| CSFDLFLPFIFC  | 0 | 0 | 0  | 0  | 3  | 4 |
| CTFDIFLHFIFC  | 0 | 0 | 0  | 0  | 2  | 4 |
| CTFDLFCPFIFC  | 0 | 0 | 0  | 0  | 1  | 4 |
| CTFDLFIPIIC   | 0 | 0 | 0  | 0  | 4  | 4 |
| CTFDLFIPIIC   | 0 | 0 | 0  | 2  | 22 | 4 |
| CTFDLFLPFIFR  | 0 | 0 | 0  | 0  | 9  | 4 |
| CTFDLFLPHFIC  | 0 | 0 | 0  | 1  | 6  | 4 |
| CTFDLMPFILC   | 0 | 0 | 0  | 0  | 7  | 4 |
| CTFDLQPFIFC   | 0 | 0 | 1  | 3  | 8  | 4 |
| CLFDTFLPFIIC  | 0 | 0 | 0  | 1  | 5  | 4 |
| CLFDTFLPFIIS  | 0 | 0 | 0  | 1  | 4  | 4 |
| CTFDTFMPFIIC  | 0 | 0 | 0  | 1  | 6  | 4 |
| CTFETFLPFIFC  | 0 | 0 | 0  | 0  | 4  | 4 |
| CTFVLPFIFC    | 0 | 0 | 0  | 0  | 5  | 4 |
| CTLDLFLPFIFC  | 0 | 0 | 0  | 0  | 1  | 4 |
| CTSDLFLPFIFC  | 0 | 0 | 0  | 0  | 2  | 4 |
| CTSDVLPFIFC   | 0 | 0 | 1  | 0  | 9  | 4 |
| CTVDTFLPFIFC  | 0 | 0 | 0  | 0  | 2  | 4 |
| CVFDAFCPFIFC  | 0 | 0 | 0  | 0  | 1  | 4 |
| CVFDIFVPAFVFC | 0 | 0 | 0  | 0  | 0  | 4 |
| CVFDIHMPVFC   | 0 | 0 | 0  | 0  | 3  | 4 |
| CVFDIHVPAFIFC | 0 | 0 | 0  | 0  | 1  | 4 |
| CVFDLFCPFVIC  | 0 | 0 | 0  | 3  | 15 | 4 |
| CVFDLFFPAFVFC | 0 | 0 | 0  | 2  | 6  | 4 |
| CVFDLFLPFIFR  | 0 | 0 | 0  | 1  | 5  | 4 |
| CVFDLFLPFITC  | 0 | 0 | 0  | 1  | 7  | 4 |
| CVFDTFLPFIIC  | 0 | 0 | 0  | 0  | 5  | 4 |
| CVFDVFCPFISC  | 0 | 0 | 1  | 4  | 17 | 4 |
| CTFDVSLPFIFC  | 0 | 0 | 1  | 7  | 12 | 4 |

|              |   |   |   |    |    |   |
|--------------|---|---|---|----|----|---|
| CTFDTLFTIIC  | 0 | 0 | 0 | 0  | 0  | 4 |
| CYFDPHFIFNPC | 0 | 0 | 0 | 2  | 8  | 4 |
| CTFDTLPLIIC  | 0 | 0 | 0 | 0  | 4  | 4 |
| CLFDTFIPC    | 0 | 0 | 0 | 0  | 3  | 4 |
| CVFDLYLPFIPC | 0 | 0 | 1 | 0  | 4  | 4 |
| CVFDRFLPFIFC | 0 | 0 | 0 | 0  | 2  | 4 |
| CVFDSFCPFILC | 0 | 0 | 0 | 0  | 2  | 4 |
| CVFDSFLNFIIC | 0 | 0 | 0 | 0  | 3  | 4 |
| CVFDSFLPFIQC | 0 | 0 | 0 | 2  | 9  | 4 |
| CVFDSFLPLIPC | 0 | 0 | 0 | 0  | 4  | 4 |
| CVFDSFLPSVLC | 0 | 0 | 0 | 10 | 12 | 4 |
| CVFDSFLPYILC | 0 | 1 | 0 | 2  | 17 | 4 |
| CVFDSFSPFVLC | 0 | 0 | 0 | 2  | 12 | 4 |
| CVFDSFVPFILC | 0 | 0 | 0 | 0  | 3  | 4 |
| CVFDSILPFVLC | 0 | 0 | 0 | 1  | 4  | 4 |
| CVFDSLLPFVLC | 0 | 0 | 0 | 10 | 18 | 4 |
| CVFDLFLPFTPC | 0 | 0 | 0 | 10 | 11 | 4 |
| CVFDTFIPFIPC | 0 | 0 | 0 | 0  | 3  | 4 |
| CVFDLFLPFILC | 0 | 0 | 0 | 0  | 9  | 4 |
| CVFDLFLPFIRC | 0 | 0 | 0 | 0  | 1  | 4 |
| CVFDVFLPFIFC | 0 | 0 | 0 | 0  | 5  | 4 |
| CVFDSFSPFIPC | 0 | 0 | 0 | 0  | 8  | 4 |
| CYFDPQFIFIPC | 0 | 0 | 0 | 4  | 4  | 4 |
| CVIDLFLPFIFC | 0 | 0 | 0 | 1  | 2  | 4 |
| CVLDIHMPFIFC | 0 | 0 | 0 | 2  | 2  | 4 |
| CVLDSFLPFVLC | 0 | 0 | 0 | 11 | 16 | 4 |
| CTFDTLFPFIY  | 0 | 0 | 0 | 2  | 11 | 4 |
| CVYDIFPFVLC  | 0 | 0 | 0 | 2  | 5  | 4 |
| CVYDIFVPFIFC | 0 | 0 | 0 | 0  | 8  | 4 |
| CVYDIFVPLILC | 0 | 0 | 0 | 0  | 3  | 4 |
| CVYDILVPFIFC | 0 | 0 | 0 | 0  | 3  | 4 |
| CVYDIYVPFIIC | 0 | 0 | 0 | 3  | 11 | 4 |
| CVYDLFLHFIFC | 0 | 0 | 0 | 0  | 8  | 4 |
| CVYDLFSPFIFC | 0 | 0 | 0 | 0  | 2  | 4 |
| CVYDTFVPFIFC | 0 | 0 | 0 | 0  | 4  | 4 |
| CVWDSFVPFIIC | 0 | 0 | 0 | 0  | 3  | 4 |
| CTFDTLHFIFC  | 0 | 0 | 1 | 0  | 5  | 4 |
| CVYDIFVPFIFC | 0 | 0 | 0 | 0  | 1  | 4 |
| CTFDSFVPFIFC | 0 | 0 | 0 | 1  | 4  | 4 |
| CYIDPHFIFIPC | 0 | 0 | 1 | 3  | 2  | 4 |
| CLFDTFHPFIFC | 0 | 0 | 0 | 1  | 9  | 4 |
| CVIDSFLPFILC | 0 | 0 | 0 | 0  | 7  | 4 |
| CVYNLFLPFIFC | 0 | 0 | 0 | 0  | 12 | 4 |
| CVFYSFLPFIFC | 0 | 0 | 0 | 0  | 1  | 4 |
| YCFDSFLPFIFC | 0 | 0 | 0 | 1  | 4  | 4 |
| CVFVFLPFIFC  | 0 | 0 | 0 | 1  | 2  | 4 |
| FIFDNWLPFIYC | 0 | 0 | 0 | 2  | 11 | 4 |
| FLFDIFLPFIIC | 0 | 0 | 0 | 0  | 2  | 4 |
| SCFDSFLPFIFC | 0 | 0 | 0 | 0  | 4  | 4 |
| SIFDNWLPFIYC | 0 | 0 | 0 | 1  | 4  | 4 |
| SVFDLFLPFIFC | 0 | 0 | 0 | 0  | 6  | 4 |
| RLFDTFVPFIFC | 0 | 0 | 2 | 0  | 5  | 4 |

|               |   |   |   |    |    |   |
|---------------|---|---|---|----|----|---|
| CVFESFLPFILC  | 0 | 0 | 0 | 1  | 2  | 4 |
| VYVDLFLPFIFC  | 0 | 0 | 0 | 1  | 6  | 4 |
| CYFDPHFIFISC  | 0 | 0 | 0 | 1  | 12 | 4 |
| CVYYLFLPFIFC  | 0 | 0 | 0 | 0  | 8  | 4 |
| CVFDYFLPFILC  | 0 | 0 | 0 | 0  | 3  | 4 |
| LYYDSFLPFIFC  | 0 | 0 | 0 | 1  | 2  | 4 |
| CCFDISLPFIFC  | 0 | 0 | 1 | 2  | 3  | 3 |
| CAFDTFLPFILC  | 0 | 0 | 0 | 1  | 2  | 3 |
| CAFDTFLPFIFC  | 0 | 0 | 0 | 0  | 3  | 3 |
| CCFDIFLPFIVC  | 0 | 0 | 0 | 0  | 5  | 3 |
| CCFDSFLPFAIC  | 0 | 0 | 0 | 4  | 2  | 3 |
| CCFDIFLPFIIC  | 0 | 0 | 0 | 1  | 1  | 3 |
| CCFDLFLPFIFC  | 0 | 0 | 0 | 0  | 2  | 3 |
| CCFDNWLPFIFC  | 0 | 0 | 0 | 0  | 1  | 3 |
| CCFDPFLPFIFC  | 0 | 0 | 0 | 0  | 2  | 3 |
| CCFDSFLAFIFC  | 0 | 0 | 0 | 0  | 2  | 3 |
| CCFDSFLHFIFC  | 0 | 0 | 0 | 0  | 5  | 3 |
| CAFDLFLPFIFC  | 0 | 0 | 0 | 0  | 0  | 3 |
| CAFDSWLPFVYC  | 0 | 0 | 0 | 4  | 5  | 3 |
| CDFDLFLPFNFIC | 0 | 0 | 0 | 0  | 0  | 3 |
| CAFDLFLPFIFC  | 0 | 0 | 0 | 0  | 0  | 3 |
| CLFDFFFPFIFC  | 0 | 0 | 1 | 24 | 15 | 3 |
| CAYDIFVPFIFC  | 0 | 0 | 0 | 0  | 3  | 3 |
| CCFDSFLPFIFC  | 0 | 0 | 0 | 3  | 2  | 3 |
| CCFDSFLPFVLC  | 0 | 0 | 0 | 5  | 18 | 3 |
| CCFDSFLPFVSC  | 0 | 0 | 0 | 9  | 5  | 3 |
| CDFDSFLPFIFC  | 0 | 0 | 0 | 0  | 0  | 3 |
| CCFVSFLPFIFC  | 0 | 0 | 0 | 3  | 7  | 3 |
| CCFDYFLPFIFC  | 0 | 0 | 0 | 2  | 8  | 3 |
| CCFDLFLPFILC  | 0 | 0 | 0 | 1  | 1  | 3 |
| CCFDSFVPFIFC  | 0 | 0 | 0 | 0  | 4  | 3 |
| CCFDSFSPFIIC  | 0 | 0 | 0 | 0  | 0  | 3 |
| CCFDSFLPLILC  | 0 | 0 | 0 | 0  | 4  | 3 |
| CCFDSFLPFVTC  | 0 | 0 | 0 | 3  | 7  | 3 |
| CIYDIFMPFIFC  | 0 | 0 | 0 | 0  | 4  | 3 |
| CIWDSVPFIFC   | 0 | 0 | 0 | 5  | 9  | 3 |
| CIWDSFVPLIFC  | 0 | 0 | 0 | 0  | 5  | 3 |
| CIWDSFVPFTLC  | 0 | 0 | 2 | 5  | 4  | 3 |
| CIWDSFMPFIFC  | 0 | 0 | 0 | 1  | 4  | 3 |
| CIWDSFLPFIFC  | 0 | 0 | 0 | 0  | 1  | 3 |
| CIIDHKPFIFC   | 0 | 0 | 0 | 0  | 6  | 3 |
| CIFDLFFPFVLC  | 0 | 0 | 0 | 3  | 9  | 3 |
| CIFDLFFPFILC  | 0 | 0 | 0 | 0  | 3  | 3 |
| CCFDLHLPFVCC  | 0 | 0 | 0 | 4  | 18 | 3 |
| CCFDLFPFIIC   | 0 | 0 | 0 | 0  | 0  | 3 |
| CCFDLFLPFILC  | 0 | 0 | 6 | 4  | 8  | 3 |
| CCFDLFLPFIFC  | 0 | 0 | 1 | 2  | 10 | 3 |
| CEFDSFLPLIIC  | 0 | 0 | 0 | 0  | 1  | 3 |
| CEFDSFLPFIFC  | 0 | 0 | 0 | 0  | 1  | 3 |
| CEFDSFLPFILC  | 0 | 0 | 0 | 0  | 3  | 3 |
| CDYDIFVPFIFC  | 0 | 0 | 0 | 0  | 0  | 3 |
| CCFDNWLPFIFC  | 0 | 0 | 0 | 7  | 16 | 3 |

|               |   |   |    |     |    |   |
|---------------|---|---|----|-----|----|---|
| CFFDSFCPFIFC  | 0 | 1 | 18 | 115 | 64 | 3 |
| CFFDPSFFFIPC  | 0 | 0 | 0  | 1   | 0  | 3 |
| CFYDFVPFIFC   | 0 | 0 | 0  | 0   | 2  | 3 |
| CIFDFFCPFIVC  | 0 | 0 | 0  | 0   | 1  | 3 |
| CIFDLFFPFIVC  | 0 | 0 | 0  | 4   | 3  | 3 |
| CFYDSLPPFIFC  | 0 | 0 | 8  | 42  | 29 | 3 |
| CHYDSFLPFIIIC | 0 | 0 | 0  | 0   | 1  | 3 |
| CFYDLFLPFIFY  | 0 | 0 | 0  | 1   | 7  | 3 |
| CLFDPHEPFYIC  | 0 | 0 | 0  | 0   | 0  | 3 |
| CVYDLFLPFMYC  | 0 | 0 | 0  | 0   | 0  | 3 |
| CLFDSFDPFIIC  | 0 | 0 | 0  | 0   | 1  | 3 |
| CVFDTFIPFIFC  | 0 | 0 | 0  | 0   | 1  | 3 |
| CVFDSYLPYIIC  | 0 | 0 | 0  | 0   | 0  | 3 |
| CVFDSWLPFIVC  | 0 | 0 | 0  | 0   | 0  | 3 |
| CVFDSRLPFVYC  | 0 | 0 | 1  | 4   | 7  | 3 |
| CYDNWLPFIIIC  | 0 | 0 | 0  | 2   | 2  | 3 |
| CIFDIHMPFTHC  | 0 | 0 | 0  | 0   | 1  | 3 |
| CIFDIHMPIIHC  | 0 | 0 | 0  | 0   | 0  | 3 |
| CIFDIHMPLIHC  | 0 | 0 | 0  | 0   | 0  | 3 |
| CIFDIHMPLTPC  | 0 | 0 | 0  | 0   | 3  | 3 |
| CIFDIHLPFILC  | 0 | 0 | 0  | 1   | 0  | 3 |
| CIFDIHLPFIIC  | 0 | 0 | 0  | 0   | 3  | 3 |
| CIFDIHKPFILC  | 0 | 0 | 0  | 0   | 3  | 3 |
| CIFDIHKNFIPC  | 0 | 0 | 0  | 0   | 0  | 3 |
| CIFDIHITFIPC  | 0 | 0 | 0  | 1   | 0  | 3 |
| CIFDIFMTFIPC  | 0 | 0 | 0  | 1   | 2  | 3 |
| CIFDIHMHFILC  | 0 | 0 | 0  | 0   | 0  | 3 |
| CIFDIFMPFVIC  | 0 | 0 | 0  | 0   | 1  | 3 |
| CIFDIFMPFIY   | 0 | 0 | 0  | 0   | 0  | 3 |
| CIFDIFMHFILC  | 0 | 0 | 0  | 3   | 4  | 3 |
| CIFDIFLPFVFC  | 0 | 0 | 0  | 0   | 0  | 3 |
| CIFDIFKPFIFC  | 0 | 0 | 0  | 1   | 1  | 3 |
| CIFDIFIPFIIC  | 0 | 0 | 0  | 0   | 0  | 3 |
| CIFDFFLPFVFC  | 0 | 0 | 16 | 39  | 31 | 3 |
| CIFDIFMPFNFC  | 0 | 0 | 0  | 0   | 0  | 3 |
| CIFDIHMHIIPC  | 0 | 0 | 0  | 0   | 0  | 3 |
| CIFDIHMPFTFC  | 0 | 0 | 0  | 1   | 8  | 3 |
| CIFDLFCPFTFC  | 0 | 0 | 1  | 7   | 4  | 3 |
| CIFDLFCPFISC  | 0 | 0 | 0  | 0   | 1  | 3 |
| CIFDLFCPFIGC  | 0 | 0 | 0  | 2   | 2  | 3 |
| CIFDLFAPFIY   | 0 | 0 | 0  | 1   | 4  | 3 |
| CIFDIQJPLIPC  | 0 | 0 | 0  | 0   | 1  | 3 |
| CIFDINMTLIPC  | 0 | 0 | 0  | 0   | 1  | 3 |
| CIFDINMPFIIC  | 0 | 0 | 0  | 0   | 0  | 3 |
| CIFDIIMPFIIC  | 0 | 0 | 0  | 0   | 6  | 3 |
| CIFDIHVPFILC  | 0 | 0 | 0  | 0   | 2  | 3 |
| CIFDIHMTFNPC  | 0 | 0 | 0  | 0   | 0  | 3 |
| CIFDIHMTFIPS  | 0 | 0 | 0  | 0   | 0  | 3 |
| CYDLFLPFIFY   | 0 | 0 | 0  | 0   | 2  | 3 |
| CIFDMFVPFIIC  | 0 | 0 | 0  | 0   | 5  | 3 |
| CYDSFLPFIIIC  | 0 | 0 | 0  | 0   | 2  | 3 |
| CIFDLFLPFVVC  | 0 | 0 | 1  | 2   | 2  | 3 |

|               |   |   |   |    |    |   |
|---------------|---|---|---|----|----|---|
| CIFDSYFPFIPC  | 0 | 0 | 0 | 1  | 3  | 3 |
| CIFDLVVPFIFC  | 0 | 0 | 0 | 0  | 7  | 3 |
| CIFDLWLPFTLC  | 0 | 0 | 0 | 0  | 2  | 3 |
| CIFDLWLPFIIC  | 0 | 0 | 0 | 0  | 0  | 3 |
| CIFDLLCPFIFC  | 0 | 0 | 0 | 0  | 1  | 3 |
| CIFDLICPFIVC  | 0 | 0 | 0 | 3  | 2  | 3 |
| CIFDLHLPFVFC  | 0 | 0 | 0 | 3  | 4  | 3 |
| CIFDLHLPFIIC  | 0 | 0 | 0 | 0  | 4  | 3 |
| CIFDLFYPFILC  | 0 | 0 | 0 | 0  | 2  | 3 |
| CIFDLFVPIIFC  | 0 | 0 | 0 | 1  | 7  | 3 |
| CIFDLFVPIITC  | 0 | 0 | 0 | 0  | 2  | 3 |
| CIFDLFRPFIVC  | 0 | 0 | 0 | 7  | 14 | 3 |
| CIFYNWLPFIYC  | 0 | 1 | 0 | 2  | 4  | 3 |
| CIFDLFLPLIFC  | 0 | 0 | 0 | 0  | 2  | 3 |
| CIFDLFIPFIYC  | 0 | 0 | 0 | 0  | 0  | 3 |
| CIFELFVPFIFC  | 0 | 0 | 0 | 2  | 5  | 3 |
| CVFDSLLPFVFC  | 0 | 0 | 0 | 4  | 6  | 3 |
| CIFDTCLPFIFC  | 1 | 0 | 0 | 0  | 5  | 3 |
| CIFDNHMTFIPC  | 0 | 0 | 0 | 0  | 1  | 3 |
| CIFDSWLPYIIC  | 0 | 0 | 0 | 0  | 3  | 3 |
| CIFDSWLPFIIC  | 0 | 0 | 0 | 2  | 2  | 3 |
| CIFDSFLPSIFC  | 0 | 0 | 0 | 0  | 0  | 3 |
| CIFDSFLPFICC  | 0 | 0 | 0 | 0  | 5  | 3 |
| CIFDSFFPSIPC  | 0 | 0 | 1 | 5  | 7  | 3 |
| CIFDSFFPFVPC  | 0 | 0 | 0 | 5  | 12 | 3 |
| CIFDSFFPFTPC  | 1 | 0 | 1 | 20 | 19 | 3 |
| CIFDSFFPFNPC  | 0 | 0 | 0 | 1  | 2  | 3 |
| CIFDSFFPFISC  | 0 | 0 | 0 | 6  | 15 | 3 |
| CIFDRFFPFIFC  | 0 | 0 | 0 | 0  | 3  | 3 |
| CIFDPFFSFIPC  | 0 | 0 | 0 | 3  | 6  | 3 |
| CIFYLFVPFIFC  | 0 | 0 | 0 | 0  | 5  | 3 |
| CIYDTLFPFIYC  | 0 | 0 | 0 | 0  | 0  | 3 |
| CIFDTLFPFVYC  | 0 | 0 | 0 | 0  | 3  | 3 |
| CIFDTHLPFILC  | 0 | 0 | 0 | 0  | 0  | 3 |
| CIFDTHKPFIPC  | 0 | 0 | 0 | 0  | 0  | 3 |
| CIFDTHFPFTLC  | 0 | 0 | 0 | 0  | 2  | 3 |
| CIFDTHFPFIMC  | 0 | 0 | 0 | 0  | 0  | 3 |
| CIFDTFWPFIFC  | 0 | 0 | 0 | 0  | 0  | 3 |
| CIFDTFLTFIYC  | 0 | 0 | 0 | 0  | 1  | 3 |
| CIFYINMTFITC  | 0 | 0 | 0 | 0  | 0  | 3 |
| CIFDTFLPYILC  | 0 | 0 | 0 | 0  | 4  | 3 |
| CIFDTHMPFIYC  | 0 | 0 | 0 | 0  | 0  | 3 |
| CIFDTFLPFTYC  | 0 | 0 | 0 | 0  | 5  | 3 |
| CIFDTFLPFTIC  | 0 | 0 | 0 | 0  | 1  | 3 |
| CIFDTFLPFIFW  | 0 | 0 | 0 | 0  | 0  | 3 |
| CIFDTFLNFIIIC | 0 | 0 | 0 | 0  | 0  | 3 |
| CIFDTFLSFIPC  | 0 | 0 | 0 | 0  | 0  | 3 |
| CIFDTVLPFIFC  | 0 | 0 | 0 | 1  | 2  | 3 |
| CIFDTSLPFIYC  | 0 | 0 | 0 | 0  | 1  | 3 |
| CIFDTILPFILC  | 0 | 0 | 0 | 0  | 0  | 3 |
| CIFDTFLAFIFC  | 0 | 0 | 0 | 0  | 4  | 3 |
| CIFYINMPFIPC  | 0 | 0 | 0 | 0  | 2  | 3 |

|               |   |   |   |    |    |   |
|---------------|---|---|---|----|----|---|
| CIFYINMHFITC  | 0 | 0 | 0 | 0  | 0  | 3 |
| CIFVLFPCFILC  | 0 | 0 | 0 | 0  | 0  | 3 |
| CIFENWLPFIFC  | 0 | 0 | 0 | 0  | 1  | 3 |
| CIFELYFPFIFC  | 0 | 0 | 0 | 4  | 5  | 3 |
| CIFDTHMPSIPC  | 0 | 0 | 0 | 0  | 0  | 3 |
| CIFELNLPFILC  | 0 | 0 | 0 | 6  | 19 | 3 |
| CIFYLFCPFIVC  | 0 | 0 | 0 | 0  | 1  | 3 |
| CIFEIHMPFITC  | 0 | 0 | 0 | 0  | 0  | 3 |
| CIFDVLPFILC   | 0 | 0 | 0 | 0  | 1  | 3 |
| CIFDYMPPFIFC  | 0 | 0 | 0 | 0  | 0  | 3 |
| CIFDTYLPFIFC  | 0 | 0 | 0 | 0  | 0  | 3 |
| CIFDNWLPYIFC  | 0 | 0 | 0 | 0  | 1  | 3 |
| CIFDNWLPSIPC  | 0 | 0 | 0 | 0  | 0  | 3 |
| CIFDNWLPFIYF  | 0 | 0 | 0 | 0  | 2  | 3 |
| CISDIFMPPFIFC | 0 | 0 | 0 | 0  | 0  | 3 |
| CLFDLFVPPFIVC | 0 | 0 | 0 | 0  | 0  | 3 |
| CLFDLFMPFIFC  | 0 | 0 | 0 | 0  | 1  | 3 |
| CLFDLFLPYIFC  | 0 | 0 | 0 | 2  | 16 | 3 |
| CLFDLLFPFIFC  | 0 | 0 | 1 | 14 | 11 | 3 |
| CLFDIFFPFIFC  | 0 | 0 | 0 | 3  | 20 | 3 |
| CLFDIFCPFITC  | 0 | 0 | 0 | 0  | 4  | 3 |
| CISDTFLPFIFC  | 0 | 0 | 0 | 1  | 1  | 3 |
| CISDSFLPFVFC  | 0 | 0 | 0 | 1  | 1  | 3 |
| CISDLFSPFIFC  | 0 | 0 | 0 | 0  | 3  | 3 |
| CISDLFAPFIYC  | 0 | 0 | 0 | 0  | 7  | 3 |
| CISDIHMPFILC  | 0 | 0 | 0 | 0  | 2  | 3 |
| CISDIFMPPFIFC | 0 | 0 | 0 | 2  | 1  | 3 |
| CIWDPFVPPFILC | 0 | 0 | 0 | 4  | 14 | 3 |
| CIFDNWLPFIYF  | 0 | 0 | 0 | 0  | 0  | 3 |
| CINDIHMPYIPC  | 0 | 0 | 0 | 0  | 0  | 3 |
| CILEIHMPFIFC  | 0 | 0 | 0 | 0  | 0  | 3 |
| CILDSFFPFIFC  | 0 | 0 | 1 | 9  | 14 | 3 |
| CILDLFVPFILC  | 0 | 0 | 0 | 0  | 1  | 3 |
| CIWDSFAPFILC  | 0 | 0 | 0 | 4  | 14 | 3 |
| CIWDSFEPFIFC  | 0 | 0 | 0 | 2  | 5  | 3 |
| CIWDSFEPFILC  | 0 | 0 | 0 | 2  | 9  | 3 |
| CLFDIFCDFIIC  | 0 | 0 | 0 | 0  | 0  | 3 |
| CLFDHFLPFVFC  | 0 | 0 | 0 | 4  | 15 | 3 |
| CLFDHFCPPFIFC | 0 | 0 | 0 | 2  | 5  | 3 |
| CIYHIHMPFIFC  | 0 | 0 | 0 | 0  | 1  | 3 |
| CLFDLFVPLVFC  | 0 | 0 | 0 | 6  | 17 | 3 |
| CLFDLFVPSVFC  | 0 | 0 | 0 | 5  | 6  | 3 |
| CLFDLHSPFIFC  | 0 | 0 | 1 | 3  | 7  | 3 |
| CLFDLYCDFILC  | 0 | 0 | 1 | 6  | 36 | 3 |
| CIFDNWLPC     | 0 | 0 | 0 | 0  | 6  | 3 |
| CIIDIFMPFIFC  | 0 | 0 | 0 | 0  | 2  | 3 |
| CLFDIFCPFIMC  | 0 | 0 | 0 | 1  | 1  | 3 |
| CIHIIHMPYIPC  | 0 | 0 | 0 | 0  | 0  | 3 |
| CLFDLFCPFIMC  | 0 | 0 | 0 | 0  | 2  | 3 |
| CLFDILLPFIFC  | 0 | 0 | 0 | 2  | 2  | 3 |
| CLFDIHMPFTPC  | 0 | 0 | 0 | 0  | 1  | 3 |
| CLFDIFMPFIYC  | 0 | 0 | 0 | 0  | 1  | 3 |

|               |   |   |    |    |    |   |
|---------------|---|---|----|----|----|---|
| CLFDIFLTFILC  | 0 | 0 | 0  | 1  | 1  | 3 |
| CLFDLFCPYIFC  | 0 | 0 | 0  | 3  | 2  | 3 |
| CLFDIFLTFIIC  | 0 | 0 | 0  | 0  | 4  | 3 |
| CLFDIFLPLILC  | 0 | 0 | 0  | 2  | 6  | 3 |
| CLFDIFLPTTYC  | 0 | 0 | 0  | 2  | 1  | 3 |
| CLFDIFLFPNPC  | 0 | 0 | 0  | 0  | 0  | 3 |
| CLFDIFLFPNIC  | 0 | 0 | 0  | 1  | 3  | 3 |
| CLFDIFLPPFIYS | 0 | 0 | 0  | 0  | 0  | 3 |
| CLFDIFLPPFINC | 0 | 0 | 0  | 2  | 12 | 3 |
| CLFDIFLPSIPC  | 0 | 0 | 0  | 0  | 0  | 3 |
| CLFDIFLLFIFC  | 0 | 0 | 0  | 0  | 2  | 3 |
| CLFDLFFPLIPC  | 1 | 0 | 1  | 16 | 8  | 3 |
| CLFDLFLPFTFC  | 0 | 0 | 0  | 1  | 1  | 3 |
| CLFDPALPFIFC  | 0 | 0 | 18 | 71 | 36 | 3 |
| CLFDPPCFPIIC  | 0 | 0 | 0  | 1  | 2  | 3 |
| CIFDLFGPFIFC  | 0 | 0 | 0  | 4  | 2  | 3 |
| CLFDNWLPFIFC  | 0 | 0 | 0  | 1  | 7  | 3 |
| CLFDLYSDFIFC  | 0 | 0 | 0  | 2  | 7  | 3 |
| CLFDLYLPFIIC  | 0 | 0 | 0  | 1  | 0  | 3 |
| CLFDLFIPIIC   | 0 | 0 | 0  | 3  | 10 | 3 |
| CVFDSLLPSIFC  | 0 | 0 | 0  | 1  | 3  | 3 |
| CIFDNWLPFIIFS | 0 | 0 | 0  | 0  | 1  | 3 |
| CVFDTFLPSIFC  | 0 | 0 | 0  | 0  | 1  | 3 |
| CLFDSFLPSIFC  | 0 | 0 | 0  | 2  | 1  | 3 |
| CLFDSFVPLILC  | 0 | 0 | 0  | 2  | 3  | 3 |
| CLFDSFVPIIFC  | 0 | 0 | 0  | 1  | 6  | 3 |
| CLFDSFVHFIFC  | 0 | 0 | 0  | 2  | 11 | 3 |
| CLFDSFMPFIYC  | 0 | 0 | 0  | 0  | 2  | 3 |
| CLFDSFLTIFILC | 0 | 0 | 0  | 2  | 2  | 3 |
| CLFDSFLTFIIC  | 0 | 0 | 0  | 0  | 0  | 3 |
| CLFDSFVPYIYC  | 0 | 0 | 0  | 0  | 2  | 3 |
| CLFDSFLPSILC  | 0 | 0 | 0  | 5  | 5  | 3 |
| CLFDSFLPLIIC  | 0 | 0 | 0  | 0  | 1  | 3 |
| CLFDSFLPFVIC  | 0 | 0 | 0  | 1  | 10 | 3 |
| CLFDSFLPFISC  | 0 | 0 | 0  | 1  | 2  | 3 |
| CLFDSFLHFIIC  | 0 | 0 | 0  | 0  | 0  | 3 |
| CLFDSFHHPFIFC | 0 | 0 | 0  | 0  | 2  | 3 |
| CTFDVLLPFIFC  | 0 | 0 | 6  | 13 | 13 | 3 |
| CLFDSILPFIFC  | 0 | 0 | 0  | 0  | 0  | 3 |
| CLFNLFCPFIFC  | 0 | 0 | 1  | 2  | 1  | 3 |
| CLFDLVPVFC    | 0 | 0 | 0  | 10 | 20 | 3 |
| CLFDSYLPFIIC  | 0 | 0 | 0  | 1  | 0  | 3 |
| CLFESFVPFIFC  | 0 | 0 | 0  | 1  | 6  | 3 |
| CLFEIFLPFIIC  | 0 | 0 | 0  | 2  | 2  | 3 |
| CLFDVFSDFIFC  | 0 | 0 | 1  | 8  | 7  | 3 |
| CLFDVFCDFVFC  | 0 | 0 | 0  | 6  | 10 | 3 |
| CLFDVFCDFICC  | 0 | 0 | 1  | 8  | 28 | 3 |
| CLFDTYVPFIFC  | 0 | 0 | 1  | 0  | 3  | 3 |
| CLFDTILPFIFC  | 0 | 0 | 2  | 14 | 6  | 3 |
| CLFDTEYFFILC  | 0 | 0 | 0  | 1  | 4  | 3 |
| CLFDTFVPPFITC | 0 | 0 | 0  | 0  | 4  | 3 |
| CLFDTLFPFSFC  | 0 | 0 | 0  | 0  | 1  | 3 |

|               |   |   |   |    |    |   |
|---------------|---|---|---|----|----|---|
| CLFDTFLPFINC  | 0 | 0 | 0 | 0  | 0  | 3 |
| CLFDTFLPFIFR  | 0 | 0 | 0 | 0  | 1  | 3 |
| CLFGSFVPFVFC  | 0 | 0 | 0 | 4  | 8  | 3 |
| CLYDSFVPFICC  | 0 | 0 | 0 | 0  | 0  | 3 |
| CTFDVFLPLIFC  | 0 | 0 | 1 | 8  | 10 | 3 |
| CLFVLHLPFIFC  | 0 | 0 | 0 | 1  | 3  | 3 |
| CLSDTFVPFIFC  | 0 | 0 | 0 | 8  | 8  | 3 |
| CLSDLHLPFIFC  | 0 | 0 | 0 | 2  | 5  | 3 |
| CLSDLFFPFIPC  | 0 | 0 | 1 | 4  | 2  | 3 |
| CLSDLFCPFIFC  | 0 | 0 | 0 | 17 | 9  | 3 |
| CLLDSFVPFVFC  | 0 | 0 | 1 | 6  | 15 | 3 |
| CLYDIFLPIIIC  | 0 | 0 | 0 | 2  | 11 | 3 |
| CLLDSFVPIIIC  | 0 | 0 | 0 | 0  | 1  | 3 |
| CLLDSFLPIIIC  | 0 | 0 | 0 | 0  | 1  | 3 |
| CLIDSFVPFIFC  | 0 | 0 | 0 | 1  | 8  | 3 |
| CLIDIFCPIIIC  | 0 | 0 | 0 | 0  | 6  | 3 |
| CLIDIFCPIIIC  | 0 | 0 | 0 | 1  | 0  | 3 |
| CLFYIFLPIIIC  | 0 | 0 | 0 | 4  | 2  | 3 |
| CLFVSFLPIIIC  | 0 | 0 | 0 | 2  | 0  | 3 |
| CLLDSFLPFIVC  | 0 | 0 | 1 | 2  | 5  | 3 |
| CLYDLFPIIIC   | 0 | 0 | 0 | 7  | 10 | 3 |
| CLYDSFLPFFFC  | 0 | 0 | 0 | 1  | 2  | 3 |
| CLYDSFLNFIFC  | 0 | 0 | 0 | 0  | 0  | 3 |
| CNFDIHMPFIIC  | 0 | 0 | 0 | 0  | 1  | 3 |
| FDLFCPIIIC    | 0 | 0 | 0 | 1  | 3  | 3 |
| CLYHSFLPFIFC  | 0 | 0 | 0 | 0  | 3  | 3 |
| CLYDTFLPIIIC  | 0 | 0 | 0 | 0  | 4  | 3 |
| CLYDSLPIIIC   | 0 | 0 | 0 | 8  | 8  | 3 |
| CLYDLFLPIIIC  | 0 | 0 | 0 | 0  | 5  | 3 |
| CLYDSILPIIIC  | 0 | 0 | 0 | 0  | 2  | 3 |
| CLYDSFMPFIIC  | 0 | 0 | 0 | 0  | 1  | 3 |
| CLYDSFLTPIIIC | 0 | 0 | 0 | 0  | 2  | 3 |
| CLYDSFLRFIFC  | 0 | 0 | 1 | 0  | 5  | 3 |
| CLYDSFLPFIYS  | 0 | 0 | 0 | 1  | 3  | 3 |
| CLYDSFLPFIMC  | 0 | 0 | 0 | 1  | 1  | 3 |
| CLFDTFLPFIFF  | 0 | 0 | 0 | 1  | 0  | 3 |
| CLFDTFLLFIFC  | 0 | 0 | 0 | 1  | 4  | 3 |
| CLFDTFIPFVFC  | 0 | 0 | 0 | 0  | 1  | 3 |
| CSFDIFLPIIIC  | 0 | 0 | 0 | 0  | 1  | 3 |
| CTFDTFLPFVFC  | 0 | 0 | 0 | 0  | 2  | 3 |
| CTFDTFLPFTPC  | 0 | 0 | 0 | 0  | 1  | 3 |
| CTFDIHTPFIPC  | 0 | 0 | 0 | 0  | 2  | 3 |
| CTFDIHMPFTPC  | 0 | 0 | 0 | 2  | 8  | 3 |
| CTFDTFLPFTLC  | 0 | 0 | 0 | 0  | 1  | 3 |
| CTFDIFSPFIIC  | 0 | 0 | 0 | 0  | 2  | 3 |
| CRFDIFLPIIIC  | 0 | 0 | 0 | 1  | 7  | 3 |
| CNIDIHKPFIPC  | 0 | 0 | 0 | 0  | 0  | 3 |
| CQFDIFCPIIIC  | 0 | 0 | 0 | 1  | 6  | 3 |
| CPYDSFLPFIYC  | 0 | 0 | 0 | 0  | 2  | 3 |
| CPFDTFLPIIIC  | 0 | 0 | 0 | 0  | 3  | 3 |
| CPFDLFCPIIIC  | 0 | 0 | 0 | 0  | 0  | 3 |
| CNYYINKHFITC  | 0 | 0 | 0 | 0  | 0  | 3 |

|               |   |   |   |    |    |   |
|---------------|---|---|---|----|----|---|
| CTFDIFSPFILC  | 0 | 0 | 0 | 5  | 14 | 3 |
| CQFDIFLPIIIC  | 0 | 0 | 0 | 1  | 7  | 3 |
| CNFDIHMTPFIPC | 0 | 0 | 0 | 0  | 1  | 3 |
| CSFDTHFPFITC  | 0 | 0 | 0 | 0  | 8  | 3 |
| CTFDIFLPIIIC  | 0 | 0 | 0 | 0  | 1  | 3 |
| CSFDSFVPFIFC  | 0 | 0 | 0 | 0  | 0  | 3 |
| CTFDIFLPIIIFC | 0 | 0 | 0 | 0  | 0  | 3 |
| CTFDIFLPIIIFC | 0 | 0 | 0 | 0  | 1  | 3 |
| CTFDIFLPIIIFC | 0 | 0 | 0 | 1  | 3  | 3 |
| CTFDIFLPIIIFC | 0 | 0 | 0 | 0  | 3  | 3 |
| CTFDIFLPIIIFC | 0 | 0 | 0 | 1  | 1  | 3 |
| CVFDSILPIIIC  | 0 | 0 | 0 | 0  | 0  | 3 |
| CTFDTFLPLFFC  | 0 | 0 | 0 | 0  | 1  | 3 |
| CTFDTFLPLIYC  | 0 | 0 | 0 | 0  | 2  | 3 |
| CTFDTFLTIFC   | 0 | 1 | 0 | 3  | 2  | 3 |
| CTFDTFMPFIPC  | 0 | 0 | 0 | 0  | 2  | 3 |
| CNFDINMPFIPC  | 0 | 0 | 0 | 1  | 0  | 3 |
| CLFDTYLPFIFC  | 0 | 0 | 0 | 3  | 11 | 3 |
| CTFDTFLPFIFS  | 0 | 0 | 0 | 1  | 9  | 3 |
| CTFDSWLPYIPC  | 0 | 0 | 1 | 4  | 24 | 3 |
| CTFDSLLPFIPC  | 0 | 0 | 0 | 1  | 7  | 3 |
| CTFDSLLPFILC  | 0 | 1 | 1 | 5  | 19 | 3 |
| CTFDLYLPFIIC  | 0 | 0 | 0 | 0  | 1  | 3 |
| CTFDLLLPIIIC  | 0 | 0 | 0 | 1  | 2  | 3 |
| CTFDTFLPFIFW  | 0 | 0 | 0 | 0  | 0  | 3 |
| CTFDLFLTFIIC  | 0 | 0 | 0 | 0  | 0  | 3 |
| CTFDLFLPLIIC  | 0 | 0 | 0 | 0  | 0  | 3 |
| CTFDLFLPFTYC  | 0 | 0 | 0 | 1  | 10 | 3 |
| CTFDLFLPFTLC  | 0 | 0 | 0 | 1  | 2  | 3 |
| CTFDLFLPFLCC  | 0 | 0 | 0 | 0  | 9  | 3 |
| CTFDLFIPIFVPC | 0 | 0 | 2 | 16 | 16 | 3 |
| CTFDILLPIIIC  | 0 | 0 | 3 | 4  | 20 | 3 |
| CTFDLFLPLIYC  | 0 | 0 | 0 | 1  | 5  | 3 |
| CTFDTFLPFITC  | 0 | 0 | 0 | 0  | 8  | 3 |
| CTFDTFLPFLCC  | 0 | 0 | 0 | 0  | 8  | 3 |
| CTFDTFLPFIFC  | 0 | 0 | 0 | 1  | 1  | 3 |
| CTFDTILPFIFC  | 0 | 0 | 0 | 2  | 4  | 3 |
| CNFDNWLPIIIC  | 0 | 0 | 0 | 0  | 2  | 3 |
| CTFDTHLPIIIC  | 0 | 0 | 0 | 9  | 17 | 3 |
| CTFDTHFPLIIC  | 0 | 0 | 0 | 0  | 0  | 3 |
| CTFDTHFPFIYC  | 0 | 0 | 0 | 2  | 7  | 3 |
| CTFDTHFPFIVC  | 0 | 0 | 0 | 0  | 3  | 3 |
| CTFDTHFPFIAC  | 0 | 0 | 1 | 3  | 5  | 3 |
| CTFDTFVPFIFC  | 0 | 0 | 0 | 0  | 8  | 3 |
| CTFDTFQPFIFC  | 0 | 0 | 0 | 0  | 0  | 3 |
| CLYDCFLPFIFC  | 0 | 0 | 0 | 0  | 1  | 3 |
| CNFDTFLPIIIC  | 0 | 0 | 0 | 0  | 1  | 3 |
| CVYDLHLPIIIC  | 0 | 0 | 0 | 0  | 1  | 3 |
| CVFDLFCPIIIC  | 0 | 0 | 0 | 0  | 1  | 3 |
| CVFDLFCPIIIC  | 0 | 0 | 0 | 0  | 4  | 3 |
| CTSDFLPIIIC   | 0 | 0 | 0 | 0  | 0  | 3 |
| CTSDLFLPIIIC  | 0 | 0 | 0 | 0  | 1  | 3 |

|               |   |   |    |    |    |   |
|---------------|---|---|----|----|----|---|
| CTLDVFLPFIFC  | 0 | 0 | 0  | 6  | 14 | 3 |
| CTLDTFLPFIIIC | 0 | 0 | 0  | 0  | 0  | 3 |
| CTLDLFLPFIIYC | 0 | 0 | 1  | 1  | 4  | 3 |
| CTYDVFLPFIFC  | 0 | 0 | 0  | 3  | 5  | 3 |
| CVFDLFLPFIIHC | 0 | 0 | 0  | 0  | 3  | 3 |
| CVFDLFLPFIIIC | 0 | 0 | 0  | 2  | 2  | 3 |
| CVFDLFLPFIIIC | 0 | 0 | 0  | 0  | 0  | 3 |
| CVFDSFLPFILR  | 0 | 0 | 0  | 1  | 1  | 3 |
| CVFDSFLPFIIIG | 0 | 0 | 0  | 0  | 1  | 3 |
| CVFDSFLPFIIAC | 0 | 0 | 0  | 2  | 3  | 3 |
| CVFDGFCPFIFC  | 0 | 0 | 0  | 4  | 6  | 3 |
| CVFDSFLHFIFC  | 0 | 0 | 0  | 0  | 3  | 3 |
| CVFDSFKPFIIIC | 0 | 0 | 0  | 0  | 0  | 3 |
| CVFDSFFPFVLC  | 0 | 0 | 0  | 0  | 1  | 3 |
| CVFDSFFPFVFC  | 0 | 0 | 0  | 3  | 10 | 3 |
| CVFDPWLPFVYC  | 0 | 0 | 0  | 6  | 11 | 3 |
| CVFDLYLPFIIC  | 0 | 0 | 0  | 2  | 11 | 3 |
| CVFDLWLPFYCC  | 0 | 0 | 0  | 0  | 6  | 3 |
| CVFDLSLPFTFC  | 0 | 0 | 0  | 4  | 5  | 3 |
| CVFDLSLPFIYC  | 0 | 0 | 0  | 0  | 1  | 3 |
| CVFDLFLPFTFY  | 0 | 0 | 0  | 0  | 2  | 3 |
| CVLDSFLPFIIS  | 0 | 0 | 0  | 0  | 0  | 3 |
| CTLDIFLPPFIFC | 0 | 0 | 0  | 0  | 3  | 3 |
| CVSDLFLPFIIYC | 0 | 0 | 1  | 0  | 1  | 3 |
| CVSDSFLPFVLC  | 0 | 0 | 1  | 8  | 6  | 3 |
| CVFDFFCPFIFC  | 0 | 0 | 0  | 0  | 2  | 3 |
| CVFDIFMPFIYC  | 0 | 0 | 0  | 0  | 0  | 3 |
| RIFDIHMPFIIC  | 0 | 0 | 0  | 0  | 1  | 3 |
| CVIDSFLPFIFC  | 0 | 0 | 0  | 0  | 1  | 3 |
| CVFDSFMPFIIS  | 0 | 0 | 0  | 0  | 0  | 3 |
| CVFDSFMPFIYC  | 0 | 0 | 0  | 0  | 1  | 3 |
| CTFGTFLPFIIIC | 0 | 0 | 0  | 0  | 0  | 3 |
| CVFDSFLTFCNIC | 0 | 0 | 0  | 0  | 0  | 3 |
| CVFDSFLSFIPC  | 0 | 0 | 0  | 0  | 0  | 3 |
| CVFDSFLPYIIS  | 0 | 0 | 0  | 0  | 2  | 3 |
| CVFDSFLPFVVC  | 0 | 0 | 0  | 2  | 1  | 3 |
| CVFDSFSPFIIC  | 0 | 0 | 0  | 0  | 0  | 3 |
| CVFDSFLPFVRC  | 0 | 0 | 0  | 3  | 8  | 3 |
| CVFDTFVPFIIC  | 0 | 0 | 0  | 0  | 0  | 3 |
| CVFDTWLPFVYC  | 0 | 0 | 0  | 0  | 5  | 3 |
| CVLDLFLPFIIYC | 0 | 0 | 0  | 0  | 1  | 3 |
| CVLDLFLPFIIIC | 0 | 0 | 0  | 0  | 1  | 3 |
| CVLDIFIPVLC   | 0 | 0 | 1  | 2  | 7  | 3 |
| CVHDLFLPFIFC  | 0 | 0 | 0  | 0  | 0  | 3 |
| CVFDIHMPFIHC  | 0 | 0 | 0  | 1  | 2  | 3 |
| CVHDIFVPFIIC  | 0 | 0 | 0  | 0  | 0  | 3 |
| CVFDTLLPFIFC  | 0 | 0 | 0  | 5  | 8  | 3 |
| CVFYFLPFIFC   | 0 | 0 | 0  | 0  | 0  | 3 |
| CVFNSFLPFIFC  | 0 | 0 | 0  | 0  | 2  | 3 |
| CVFHSFLPFILC  | 0 | 0 | 0  | 0  | 0  | 3 |
| CVFESFLPFVLC  | 0 | 0 | 0  | 0  | 2  | 3 |
| CVFELYTPFILC  | 0 | 0 | 19 | 91 | 57 | 3 |

|               |   |   |   |    |    |   |
|---------------|---|---|---|----|----|---|
| CVFDVSCPFIFC  | 0 | 0 | 0 | 5  | 10 | 3 |
| CVFDVFCPSIFC  | 0 | 0 | 0 | 5  | 12 | 3 |
| CVFVSLPFIFC   | 0 | 0 | 0 | 0  | 2  | 3 |
| CVFDSFLPFSLC  | 0 | 0 | 0 | 0  | 1  | 3 |
| CVFDSFLPFILCC | 0 | 0 | 0 | 0  | 0  | 3 |
| CVFDSFLPFIFPS | 0 | 0 | 0 | 0  | 1  | 3 |
| CVFDIHMPFIIPY | 0 | 0 | 0 | 0  | 2  | 3 |
| RIFDLFVPFIIC  | 0 | 0 | 0 | 0  | 3  | 3 |
| CVFDFFLPFILC  | 0 | 0 | 8 | 20 | 13 | 3 |
| RIFDIFMPFIIC  | 0 | 0 | 0 | 0  | 1  | 3 |
| CVYDLCLPFIIYC | 0 | 0 | 0 | 0  | 5  | 3 |
| CVYDIFVRFIFC  | 0 | 0 | 0 | 0  | 1  | 3 |
| CVYDIFEPFIIC  | 0 | 0 | 0 | 0  | 2  | 3 |
| CVYDIFVPFIIR  | 0 | 0 | 0 | 1  | 7  | 3 |
| CVYDIFVPSIFC  | 0 | 0 | 0 | 0  | 2  | 3 |
| CVYDIFVQFIFC  | 0 | 0 | 0 | 0  | 1  | 3 |
| CVYDLFLSFIYC  | 0 | 0 | 0 | 3  | 1  | 3 |
| CYFEPHFIFIPC  | 0 | 0 | 0 | 0  | 5  | 3 |
| CVYDLFFPFIIYC | 0 | 0 | 0 | 2  | 5  | 3 |
| CVYDLFLPFIFSC | 0 | 0 | 0 | 3  | 9  | 3 |
| CVYDLFLPFIIYG | 0 | 0 | 0 | 0  | 0  | 3 |
| CVYDLFLPFNIYC | 0 | 0 | 0 | 2  | 12 | 3 |
| CVYDLFLPIIYC  | 0 | 1 | 1 | 1  | 4  | 3 |
| CVYDLFLPLIFC  | 0 | 0 | 0 | 2  | 4  | 3 |
| CVYDLFVVPFIIC | 0 | 0 | 0 | 0  | 2  | 3 |
| CLFDPSLSFIPC  | 0 | 0 | 1 | 24 | 7  | 3 |
| CVYDLLLPFIIC  | 0 | 0 | 0 | 2  | 5  | 3 |
| CYFDPHSIFIPC  | 0 | 0 | 0 | 4  | 11 | 3 |
| CYFDPHFIIYC   | 0 | 0 | 0 | 1  | 2  | 3 |
| CYFDIFLPFIIC  | 0 | 0 | 0 | 2  | 9  | 3 |
| CVYVIFVPFIIC  | 0 | 0 | 0 | 3  | 12 | 3 |
| CVYNLFLPFIFC  | 0 | 0 | 0 | 0  | 1  | 3 |
| CVYGFVVPFIIC  | 0 | 0 | 0 | 0  | 3  | 3 |
| CVYELFLPFIIYC | 0 | 0 | 0 | 2  | 4  | 3 |
| RIFDIFMPFILC  | 0 | 0 | 0 | 0  | 6  | 3 |
| CVYDVFPFIIC   | 0 | 0 | 0 | 0  | 3  | 3 |
| CVYDSYLPFIIC  | 0 | 0 | 0 | 0  | 1  | 3 |
| CVSDSFLPFIFC  | 0 | 0 | 0 | 0  | 2  | 3 |
| CYFDSHFIFIPC  | 0 | 0 | 0 | 2  | 1  | 3 |
| RIFDTLFPFILC  | 0 | 0 | 0 | 0  | 2  | 3 |
| FYFDPHFIFIPC  | 0 | 0 | 0 | 0  | 3  | 3 |
| FVFDLFLPFIFC  | 0 | 0 | 0 | 0  | 1  | 3 |
| FIFDLFVPFIIC  | 0 | 0 | 0 | 0  | 1  | 3 |
| CYYPHFIFIFIPC | 0 | 0 | 0 | 2  | 9  | 3 |
| CYVDLFLPFIFC  | 0 | 0 | 0 | 2  | 12 | 3 |
| FVYDLFLPFIIYC | 0 | 0 | 0 | 0  | 3  | 3 |
| FLFDSFVPFIIC  | 0 | 0 | 0 | 2  | 1  | 3 |
| RLFDIFLPFIIC  | 0 | 0 | 0 | 0  | 7  | 3 |
| YFDLFCPFIVC   | 0 | 0 | 0 | 1  | 0  | 3 |
| RLFDSFVPFVFC  | 0 | 0 | 0 | 0  | 2  | 3 |
| RTFDIFLPFIIC  | 0 | 0 | 0 | 0  | 0  | 3 |
| SVYDLFLPFIFC  | 0 | 0 | 0 | 0  | 0  | 3 |

|               |   |   |   |   |    |   |
|---------------|---|---|---|---|----|---|
| SVFDSFLPFVLC  | 0 | 0 | 0 | 2 | 1  | 3 |
| STFDTFLPFIFC  | 0 | 0 | 0 | 0 | 4  | 3 |
| SLFDSFVPPFIFC | 0 | 0 | 1 | 1 | 3  | 3 |
| RLFDFVPPFVFC  | 0 | 0 | 0 | 0 | 0  | 3 |
| SLFDFVPPFVFC  | 0 | 0 | 0 | 0 | 1  | 3 |
| SIFDNWLPFIFC  | 0 | 0 | 0 | 0 | 1  | 3 |
| RVYDLFLPFIFC  | 0 | 0 | 0 | 0 | 1  | 3 |
| RVFDSFLPFILC  | 0 | 0 | 0 | 0 | 8  | 3 |
| RTFDTFLPFIFC  | 0 | 0 | 0 | 0 | 7  | 3 |
| SLFDLFCPPFIFC | 0 | 0 | 0 | 0 | 3  | 3 |
| CCFDSFLRFIFC  | 0 | 0 | 0 | 0 | 1  | 2 |
| CCFDLFFPPFIFC | 0 | 0 | 0 | 1 | 7  | 2 |
| CCFDSFLPIIFC  | 0 | 0 | 0 | 0 | 5  | 2 |
| CCFDSFLPLIYC  | 0 | 0 | 0 | 0 | 0  | 2 |
| CCFDSLLPFIIIC | 0 | 0 | 0 | 0 | 2  | 2 |
| CCFDSFLPLIIC  | 0 | 0 | 0 | 0 | 0  | 2 |
| CCFDSFVPPFIIC | 0 | 0 | 0 | 0 | 0  | 2 |
| CCFDSLLPFIYC  | 0 | 0 | 0 | 0 | 0  | 2 |
| CCFDSLLPFIIIC | 0 | 0 | 0 | 0 | 1  | 2 |
| CCFDVFLPFIFC  | 0 | 0 | 0 | 4 | 6  | 2 |
| CCFESFLPFIFC  | 0 | 0 | 1 | 0 | 3  | 2 |
| CCLDIFLPIIYC  | 0 | 0 | 0 | 0 | 0  | 2 |
| CCFDSFPPFIIC  | 0 | 0 | 0 | 0 | 0  | 2 |
| CCFDSFLPFINIC | 0 | 0 | 0 | 0 | 0  | 2 |
| CCLDSFLPFIIIC | 0 | 0 | 0 | 0 | 0  | 2 |
| CCFDSFLPFVVMC | 0 | 0 | 0 | 7 | 13 | 2 |
| CCFDSFLPFIIAC | 0 | 0 | 0 | 0 | 1  | 2 |
| CCFDIFMPPFILC | 0 | 0 | 0 | 0 | 3  | 2 |
| CCFDSLLRFIFC  | 0 | 0 | 0 | 0 | 4  | 2 |
| CFWDSFVPPFIFC | 0 | 0 | 0 | 0 | 4  | 2 |
| CFYDLFLPSIFC  | 1 | 1 | 0 | 1 | 12 | 2 |
| CCFDIFVPPFIFC | 0 | 0 | 0 | 0 | 0  | 2 |
| CDFDLFLPFTFC  | 0 | 0 | 0 | 3 | 4  | 2 |
| CAFDFLFPFIFC  | 0 | 0 | 0 | 0 | 2  | 2 |
| CAFDFIMPFIIC  | 0 | 0 | 0 | 0 | 1  | 2 |
| CDYDFVPPFILC  | 0 | 0 | 0 | 0 | 1  | 2 |
| CDYDIHMPFIIC  | 0 | 0 | 0 | 0 | 0  | 2 |
| CEFDSYLPFIIC  | 0 | 0 | 0 | 0 | 3  | 2 |
| CEFDSYMPFIIC  | 0 | 0 | 0 | 0 | 0  | 2 |
| CEIDSFLPFIIIC | 0 | 0 | 0 | 0 | 1  | 2 |
| CEFHSFLPFIIIC | 0 | 0 | 0 | 0 | 0  | 2 |
| CDFDIFIPFVFC  | 0 | 0 | 0 | 0 | 2  | 2 |
| CDFDIHMPFIIPS | 0 | 0 | 0 | 0 | 0  | 2 |
| CDFDLFLPFIYC  | 0 | 0 | 0 | 0 | 1  | 2 |
| CDFDNWLPFIYC  | 0 | 0 | 0 | 0 | 0  | 2 |
| CDFDSFMPFIIC  | 0 | 0 | 0 | 0 | 0  | 2 |
| CFYDLFMPFIIC  | 0 | 0 | 0 | 2 | 5  | 2 |
| CFNDLFLPFIYC  | 0 | 0 | 0 | 0 | 0  | 2 |
| CFYDLFSPFIIC  | 0 | 0 | 1 | 6 | 13 | 2 |
| CFYDLFVPPFIIC | 0 | 0 | 0 | 0 | 0  | 2 |
| CCSDIFLFPFIFC | 0 | 0 | 0 | 2 | 6  | 2 |
| CAYDFVPPFIIC  | 0 | 0 | 0 | 0 | 0  | 2 |

|               |   |   |   |    |    |   |
|---------------|---|---|---|----|----|---|
| CAFDFLFPFILC  | 0 | 0 | 0 | 1  | 4  | 2 |
| CAFDFLFPFTFC  | 0 | 0 | 0 | 3  | 9  | 2 |
| CAFDSFLPFIFC  | 0 | 0 | 0 | 0  | 0  | 2 |
| CAFDSFLPFVLC  | 0 | 0 | 0 | 10 | 10 | 2 |
| CCFDIFSPFIFC  | 0 | 0 | 1 | 1  | 6  | 2 |
| CAYDLFLPFIFC  | 0 | 0 | 0 | 0  | 1  | 2 |
| CAYDLFLPFILC  | 0 | 0 | 0 | 0  | 0  | 2 |
| CCFDIFLHFIFC  | 0 | 0 | 0 | 0  | 1  | 2 |
| CCFDIFLPIFIFC | 0 | 0 | 0 | 1  | 1  | 2 |
| CCFDIFLPIYFC  | 0 | 0 | 0 | 1  | 2  | 2 |
| CCFDIFLSFIFC  | 0 | 0 | 0 | 1  | 1  | 2 |
| CLFDNLFPIIIC  | 0 | 0 | 0 | 1  | 4  | 2 |
| CIFDIVMPFILC  | 0 | 0 | 0 | 0  | 0  | 2 |
| CCFDLFFPFVPC  | 0 | 0 | 2 | 9  | 8  | 2 |
| CCFDLFLPFIIIC | 0 | 0 | 0 | 0  | 3  | 2 |
| CCFDLFLPFIYC  | 0 | 0 | 0 | 1  | 6  | 2 |
| CCFDLSLPPVCC  | 0 | 0 | 0 | 1  | 4  | 2 |
| CCFDNWLPIFIFC | 0 | 0 | 0 | 0  | 2  | 2 |
| CCFDPPFFFIIC  | 0 | 0 | 0 | 0  | 2  | 2 |
| CCFDPPFFSFIIC | 0 | 0 | 0 | 1  | 3  | 2 |
| CCFDLFCPPFIFC | 0 | 0 | 0 | 4  | 6  | 2 |
| CCFDPHLPIIIC  | 0 | 1 | 0 | 0  | 3  | 2 |
| CCFDSFMPFIIC  | 0 | 0 | 0 | 0  | 10 | 2 |
| CCFDSFMPFIYC  | 0 | 0 | 0 | 1  | 12 | 2 |
| CCFDSFVPPFIIC | 0 | 0 | 0 | 0  | 1  | 2 |
| CCFDLFLPFIFC  | 0 | 0 | 0 | 0  | 1  | 2 |
| CCFDLFLPFIIIC | 0 | 0 | 0 | 0  | 1  | 2 |
| CIFDLFAHFIYC  | 0 | 0 | 0 | 0  | 1  | 2 |
| CILDSFLPFVFC  | 0 | 0 | 0 | 0  | 0  | 2 |
| CIWDPFVPPFIFC | 0 | 0 | 0 | 0  | 0  | 2 |
| CIFDIFMPYIFC  | 0 | 0 | 0 | 0  | 0  | 2 |
| CIWDSFVPPFIYC | 0 | 0 | 0 | 0  | 1  | 2 |
| CIWDSFMPFIIC  | 0 | 0 | 0 | 0  | 1  | 2 |
| CILDTPFPFIFC  | 0 | 0 | 1 | 0  | 3  | 2 |
| CILDTHMPFIIC  | 0 | 0 | 0 | 0  | 1  | 2 |
| CILEIHMPLIIC  | 0 | 0 | 0 | 0  | 1  | 2 |
| CINHIHMPFIIC  | 0 | 0 | 0 | 0  | 0  | 2 |
| CIRDSFVPPFIFC | 0 | 0 | 1 | 1  | 11 | 2 |
| CISDLFLPFIYC  | 0 | 0 | 0 | 0  | 0  | 2 |
| CISDNWLPFIIC  | 0 | 0 | 0 | 0  | 2  | 2 |
| CISDTFLPFIFC  | 0 | 0 | 0 | 0  | 3  | 2 |
| CISELNLPFIFC  | 0 | 0 | 0 | 2  | 2  | 2 |
| CCFDLFLPFILC  | 0 | 0 | 0 | 1  | 1  | 2 |
| CCFDLFLPFIFC  | 0 | 0 | 0 | 0  | 0  | 2 |
| CCFDSFLPFIFC  | 0 | 0 | 1 | 3  | 7  | 2 |
| CCFDVFCPPFIFC | 0 | 0 | 0 | 0  | 2  | 2 |
| CFYDIFLPIIIC  | 0 | 0 | 0 | 0  | 1  | 2 |
| CFYDIHMPFIIC  | 0 | 0 | 0 | 0  | 1  | 2 |
| CFYDLFCLLFFC  | 0 | 0 | 0 | 0  | 1  | 2 |
| CFYDLFLPFIFC  | 0 | 0 | 0 | 0  | 11 | 2 |
| CFYDLFLPFVFC  | 0 | 0 | 0 | 1  | 14 | 2 |
| CCFDIHMPPFTPC | 0 | 0 | 0 | 0  | 0  | 2 |

|               |   |   |    |     |    |   |
|---------------|---|---|----|-----|----|---|
| CFFDIFMPFIIC  | 0 | 0 | 0  | 0   | 0  | 2 |
| CEYDSYLPFIIC  | 0 | 0 | 0  | 0   | 0  | 2 |
| CFCDLFLPFIFC  | 0 | 0 | 0  | 2   | 3  | 2 |
| CFFDIFMPFIPC  | 0 | 0 | 0  | 0   | 3  | 2 |
| CFFDIFLPPFIIC | 0 | 0 | 0  | 0   | 0  | 2 |
| CFFDIFLPPFIYC | 0 | 0 | 0  | 0   | 0  | 2 |
| CFFDIFMPFIFC  | 0 | 0 | 0  | 0   | 1  | 2 |
| CIFDIFMPLFFC  | 0 | 0 | 0  | 0   | 0  | 2 |
| CIFDIFMRFILC  | 0 | 0 | 0  | 0   | 0  | 2 |
| CHFDFLCPFIIC  | 0 | 0 | 0  | 0   | 2  | 2 |
| CHFDTLFLPFIFC | 0 | 0 | 0  | 3   | 9  | 2 |
| CHFDTYLPPFIYC | 0 | 0 | 0  | 0   | 0  | 2 |
| CIFDKWLPFIIC  | 0 | 0 | 0  | 0   | 3  | 2 |
| CGYDIFVPPFIIC | 0 | 0 | 0  | 0   | 2  | 2 |
| CFYDLILPFIFC  | 0 | 0 | 0  | 0   | 2  | 2 |
| CFYDLMLPFIFC  | 0 | 0 | 0  | 0   | 4  | 2 |
| CFYDLYLPPFIIC | 0 | 0 | 0  | 1   | 2  | 2 |
| CFYHLFLPFIFC  | 0 | 0 | 0  | 0   | 0  | 2 |
| CFYVTFVPPFIIC | 0 | 0 | 0  | 0   | 0  | 2 |
| CLFDNWLPFIILC | 0 | 0 | 0  | 0   | 0  | 2 |
| CIFDIFMPYIPC  | 1 | 0 | 0  | 0   | 0  | 2 |
| CLFDPPFIFFPC  | 0 | 0 | 31 | 130 | 23 | 2 |
| CVFDSFLPIIPC  | 0 | 0 | 0  | 0   | 0  | 2 |
| CVFDSFLPLFFC  | 0 | 0 | 0  | 0   | 0  | 2 |
| CVFDSFLPLIIS  | 0 | 0 | 0  | 0   | 0  | 2 |
| CVFDSFLPSIMC  | 0 | 0 | 0  | 0   | 2  | 2 |
| CIFDIHMTIIPS  | 0 | 0 | 0  | 0   | 0  | 2 |
| CIFDIFMSFIFC  | 0 | 0 | 0  | 0   | 0  | 2 |
| CIFDAFLPFIFC  | 0 | 0 | 0  | 0   | 1  | 2 |
| CIFDAFVPPFIVC | 0 | 0 | 0  | 3   | 20 | 2 |
| CIFDAHMPFIFC  | 0 | 0 | 0  | 1   | 1  | 2 |
| CIFDDWLPFIIC  | 0 | 0 | 0  | 1   | 3  | 2 |
| CIFDIFMPFFLC  | 0 | 0 | 0  | 0   | 3  | 2 |
| CIFDFFLPPFIIC | 0 | 0 | 0  | 2   | 3  | 2 |
| CIFDFHMPFITC  | 0 | 0 | 0  | 0   | 0  | 2 |
| CIFDFHMPFIIC  | 0 | 0 | 0  | 0   | 1  | 2 |
| CIFDFNMPPFIFC | 0 | 0 | 0  | 0   | 0  | 2 |
| CIFDIDMPFISC  | 0 | 0 | 0  | 0   | 0  | 2 |
| CIFDIFIPVPC   | 0 | 0 | 0  | 0   | 1  | 2 |
| CIFDIFLPPFINC | 0 | 0 | 0  | 0   | 0  | 2 |
| CIFDIFLPLIFC  | 0 | 0 | 0  | 0   | 1  | 2 |
| CIFDFFMPFILC  | 0 | 0 | 0  | 0   | 2  | 2 |
| CIFDIHMNFIHC  | 0 | 0 | 0  | 0   | 3  | 2 |
| CIFDAFLPFILC  | 0 | 0 | 0  | 1   | 1  | 2 |
| CIFDIHMTFIQC  | 0 | 0 | 0  | 0   | 0  | 2 |
| CIFDIFMLFIPC  | 0 | 0 | 0  | 0   | 4  | 2 |
| CIFDIFMTFIFC  | 0 | 0 | 0  | 0   | 0  | 2 |
| CIFDIFRPFILC  | 0 | 0 | 0  | 0   | 0  | 2 |
| CIFDIFTPPFIIC | 0 | 0 | 0  | 0   | 10 | 2 |
| CIFDIFMPFIFS  | 0 | 0 | 0  | 0   | 1  | 2 |
| CIFDIFTPFIFC  | 0 | 0 | 0  | 1   | 1  | 2 |
| CIFDIHIFIPC   | 0 | 0 | 0  | 0   | 0  | 2 |

|               |   |   |   |   |   |   |
|---------------|---|---|---|---|---|---|
| CIFDIHIFIPC   | 0 | 0 | 0 | 0 | 1 | 2 |
| CIFDIHIFFIHC  | 0 | 0 | 0 | 0 | 1 | 2 |
| CIFDIHIFVLC   | 0 | 0 | 0 | 0 | 3 | 2 |
| CIFDIHIPIIPC  | 0 | 0 | 0 | 0 | 1 | 2 |
| CIFDIHKHFIPC  | 0 | 0 | 0 | 0 | 0 | 2 |
| CIFDIHKHYIPC  | 0 | 0 | 0 | 0 | 0 | 2 |
| CIFDIHFPFITC  | 0 | 0 | 0 | 0 | 2 | 2 |
| CIFDIHKPIIPC  | 0 | 0 | 0 | 2 | 2 | 2 |
| CIFDIFMPFFPC  | 0 | 0 | 0 | 0 | 1 | 2 |
| CIFDIHMNFINC  | 0 | 0 | 0 | 0 | 0 | 2 |
| CIFDIHMPPFIHS | 0 | 0 | 0 | 0 | 0 | 2 |
| CIFDIIMPIILC  | 0 | 0 | 0 | 0 | 0 | 2 |
| CIFDIKIPLIPC  | 0 | 0 | 0 | 0 | 0 | 2 |
| CIFDIHMPPFIMC | 0 | 0 | 0 | 0 | 1 | 2 |
| CIFDIHMPPFIPT | 0 | 0 | 0 | 0 | 2 | 2 |
| CIFDIHMPPFKPC | 0 | 0 | 0 | 1 | 1 | 2 |
| CIFDIHMPPFLCC | 0 | 0 | 0 | 0 | 1 | 2 |
| CIFDIHMPPFTPS | 0 | 0 | 0 | 1 | 0 | 2 |
| CIFDIHMPPFTTC | 0 | 0 | 0 | 1 | 2 | 2 |
| CIFDIHMPPFYPC | 0 | 0 | 0 | 0 | 3 | 2 |
| CIFDIHMPIIPS  | 0 | 0 | 0 | 0 | 4 | 2 |
| CIFDIHMPIINPS | 0 | 0 | 0 | 0 | 0 | 2 |
| CIFDIHMPLIAC  | 0 | 0 | 0 | 0 | 0 | 2 |
| CIFDIHMPLIIC  | 0 | 0 | 0 | 0 | 0 | 2 |
| CIFDIHMPYIIC  | 0 | 0 | 0 | 0 | 0 | 2 |
| CIFDIHMPYITC  | 0 | 0 | 0 | 0 | 3 | 2 |
| CIFDIHMPPFIPC | 0 | 0 | 0 | 0 | 0 | 2 |
| CIFDIHMTFIFP  | 0 | 0 | 0 | 0 | 0 | 2 |
| CIFDIHNPFIFC  | 0 | 0 | 0 | 0 | 0 | 2 |
| CIFDIHTPLIPC  | 0 | 0 | 0 | 0 | 0 | 2 |
| CIFDIIMPFIIC  | 0 | 0 | 0 | 0 | 0 | 2 |
| CIFDINMPFILC  | 0 | 0 | 0 | 0 | 3 | 2 |
| CIFDIKMPFIFC  | 0 | 0 | 0 | 0 | 0 | 2 |
| CIFDILMPFINC  | 0 | 0 | 0 | 0 | 0 | 2 |
| CIFDINIPFIFC  | 0 | 0 | 0 | 0 | 1 | 2 |
| CIFDINIPFITC  | 0 | 0 | 0 | 0 | 1 | 2 |
| CIFDINMHFITC  | 0 | 0 | 0 | 0 | 1 | 2 |
| CIFDIIMPFINC  | 0 | 0 | 0 | 0 | 0 | 2 |
| CIFDINMPFTPC  | 0 | 0 | 0 | 0 | 2 | 2 |
| CIFDINMPFIQC  | 0 | 0 | 0 | 0 | 1 | 2 |
| CIFDINMRFIPC  | 0 | 0 | 0 | 0 | 0 | 2 |
| CIFDIQKPFIFC  | 0 | 0 | 0 | 0 | 0 | 2 |
| CIFDIQMPFTPC  | 0 | 0 | 0 | 0 | 0 | 2 |
| CIFDIRMPFILC  | 0 | 0 | 0 | 0 | 1 | 2 |
| CIFDIRMPLIPC  | 0 | 0 | 0 | 0 | 2 | 2 |
| CIFDISMPFIFC  | 0 | 0 | 0 | 0 | 1 | 2 |
| CIWDSFVPFTFC  | 0 | 0 | 2 | 0 | 4 | 2 |
| CLDFIFCSFILC  | 0 | 0 | 0 | 1 | 2 | 2 |
| CIYDIHMPFIPY  | 0 | 0 | 0 | 0 | 0 | 2 |
| CIFDLLSPFIFC  | 0 | 0 | 0 | 2 | 4 | 2 |
| CIFDLLVPFILC  | 0 | 0 | 0 | 0 | 1 | 2 |
| CIFDLSCPFIIC  | 0 | 0 | 0 | 0 | 2 | 2 |



|               |   |   |   |   |    |   |
|---------------|---|---|---|---|----|---|
| CIFDLSSPFIFC  | 0 | 0 | 0 | 3 | 4  | 2 |
| CIFDLSVPPFIC  | 0 | 0 | 0 | 0 | 0  | 2 |
| CIFDLLLPFIFC  | 0 | 0 | 0 | 1 | 0  | 2 |
| CIFDLWLPPFIVC | 0 | 0 | 0 | 0 | 1  | 2 |
| CIFDLFVPPFIIS | 0 | 0 | 0 | 0 | 0  | 2 |
| CIFDLFVHFIFC  | 0 | 0 | 0 | 1 | 3  | 2 |
| CIFDLFAPSIYC  | 0 | 0 | 0 | 0 | 5  | 2 |
| CIFDLFCLFILC  | 0 | 0 | 0 | 0 | 0  | 2 |
| CIFDLFCPFIFC  | 0 | 0 | 0 | 0 | 1  | 2 |
| CIFDLFCPFIVR  | 0 | 0 | 0 | 2 | 3  | 2 |
| CIFDLFCPFIVS  | 0 | 0 | 0 | 0 | 9  | 2 |
| CIFDLFCPYIVC  | 0 | 0 | 0 | 2 | 10 | 2 |
| CIFDLFEPFIFC  | 0 | 0 | 0 | 0 | 1  | 2 |
| CIFDLLVPPFIIC | 0 | 0 | 0 | 0 | 1  | 2 |
| CIFDLLLPFVFC  | 0 | 0 | 0 | 1 | 2  | 2 |
| CIFDTHLPFIPC  | 0 | 0 | 0 | 0 | 0  | 2 |
| CIFDLLAPFIYC  | 0 | 0 | 1 | 0 | 9  | 2 |
| CIFDTHMPFITC  | 0 | 0 | 0 | 1 | 1  | 2 |
| CIFDTHMPFNPC  | 0 | 0 | 0 | 0 | 2  | 2 |
| CIFDTHYPFILC  | 0 | 0 | 0 | 0 | 0  | 2 |
| CIFDSFCPFILC  | 0 | 0 | 0 | 0 | 9  | 2 |
| CIFGNWLPFILC  | 0 | 0 | 0 | 0 | 1  | 2 |
| CIFDQVPPFIFC  | 0 | 0 | 1 | 3 | 6  | 2 |
| CIFDPFLPFVFC  | 0 | 0 | 0 | 1 | 5  | 2 |
| CIFDLFVPPFLCC | 0 | 0 | 0 | 1 | 2  | 2 |
| CIFDLFVPPSFC  | 0 | 0 | 0 | 0 | 1  | 2 |
| CIFDLFVPPFTLC | 0 | 0 | 0 | 2 | 0  | 2 |
| CIFDLFVPLILC  | 0 | 0 | 0 | 0 | 2  | 2 |
| CIFDLFVPLIPC  | 0 | 0 | 0 | 0 | 0  | 2 |
| CIFDLFVPLIYC  | 0 | 0 | 0 | 0 | 1  | 2 |
| CIFDLFYPFIIC  | 0 | 0 | 0 | 0 | 2  | 2 |
| CIFDLFVPPFINC | 0 | 0 | 0 | 0 | 0  | 2 |
| CIFDLFVLFIFC  | 0 | 0 | 0 | 1 | 1  | 2 |
| CIFDLFFPPFAPC | 0 | 0 | 0 | 1 | 2  | 2 |
| CIFDLFLPFTLC  | 0 | 0 | 0 | 0 | 1  | 2 |
| CIFDLFLPFTYC  | 0 | 0 | 0 | 1 | 1  | 2 |
| CIFDNWLQFIFC  | 0 | 0 | 0 | 0 | 3  | 2 |
| CIFDNWLQFILC  | 0 | 0 | 0 | 0 | 0  | 2 |
| CIFDNWLTFIIC  | 0 | 0 | 0 | 0 | 0  | 2 |
| CIFDNWLTFIYC  | 0 | 0 | 0 | 0 | 6  | 2 |
| CIFDNWPPFIIC  | 0 | 0 | 0 | 0 | 2  | 2 |
| CIFDNWRPFIYC  | 0 | 0 | 0 | 0 | 1  | 2 |
| CIFDNWRQFIYC  | 0 | 0 | 0 | 0 | 0  | 2 |
| CIFDNWLPSIIC  | 0 | 0 | 0 | 0 | 1  | 2 |
| CIFDNWLKFIYC  | 0 | 0 | 0 | 0 | 0  | 2 |
| CIFDNWFPFIYC  | 0 | 0 | 0 | 0 | 0  | 2 |
| CIFDNSLPFIYC  | 0 | 0 | 0 | 0 | 4  | 2 |
| CIFDLWLPLTAC  | 0 | 0 | 1 | 6 | 4  | 2 |
| CIFDLWPPFTPC  | 0 | 0 | 0 | 0 | 1  | 2 |
| CIFDLYDPPFIFC | 0 | 0 | 0 | 0 | 0  | 2 |
| CIFDMFCPFIVC  | 0 | 0 | 0 | 2 | 11 | 2 |
| CIFDNWLPLILC  | 0 | 0 | 0 | 0 | 1  | 2 |

|               |   |   |   |   |    |   |
|---------------|---|---|---|---|----|---|
| CIFDNWLPPFILS | 0 | 0 | 0 | 0 | 0  | 2 |
| CIFDNWLPIINC  | 0 | 0 | 0 | 0 | 0  | 2 |
| CIFDLWLPPFIYC | 0 | 0 | 0 | 0 | 0  | 2 |
| CIFDLFLTIFIC  | 0 | 0 | 0 | 0 | 0  | 2 |
| CIFDLFMPFILC  | 0 | 0 | 0 | 0 | 0  | 2 |
| CIFDLFMPFIYC  | 0 | 0 | 0 | 0 | 1  | 2 |
| CIFDLFSPPFVFC | 0 | 0 | 0 | 4 | 5  | 2 |
| CIFDLFLPFIVC  | 0 | 0 | 0 | 0 | 1  | 2 |
| CIFDLWLPPFTSC | 0 | 0 | 1 | 0 | 1  | 2 |
| CIFDNWLPIIIC  | 0 | 0 | 0 | 0 | 0  | 2 |
| CIFDLWLPIITAC | 0 | 0 | 0 | 0 | 2  | 2 |
| CIFDNWLPPFMYC | 0 | 0 | 0 | 0 | 1  | 2 |
| CIFDNWLPPFNYC | 0 | 0 | 0 | 1 | 13 | 2 |
| CIFDNWLPPFSYC | 0 | 0 | 0 | 0 | 3  | 2 |
| CIFDNWLPPFTPC | 0 | 0 | 0 | 0 | 6  | 2 |
| CIFDNWLPPFVPC | 0 | 0 | 0 | 0 | 0  | 2 |
| CIFDTHMLFIPC  | 0 | 0 | 0 | 0 | 2  | 2 |
| CIFDTHFPSILC  | 0 | 0 | 0 | 0 | 0  | 2 |
| CIYDIHMPPFIHC | 0 | 0 | 0 | 0 | 0  | 2 |
| CIFDTLPPFFFC  | 0 | 0 | 0 | 0 | 2  | 2 |
| CIFDSFYSFIPC  | 0 | 0 | 0 | 2 | 5  | 2 |
| CIFDSFMPFIIC  | 0 | 0 | 0 | 0 | 0  | 2 |
| CIFDSFCPFIPC  | 0 | 0 | 0 | 0 | 1  | 2 |
| CIFDSFLLFFC   | 0 | 0 | 0 | 0 | 0  | 2 |
| CIFDSFPPFIIS  | 0 | 0 | 0 | 0 | 3  | 2 |
| CIFDSFPPFIY   | 0 | 0 | 0 | 0 | 2  | 2 |
| CIFDSFPPFIHC  | 0 | 0 | 2 | 6 | 17 | 2 |
| CIFDSFPPFIPS  | 0 | 0 | 1 | 6 | 6  | 2 |
| CIFDSFSPFIIC  | 0 | 0 | 0 | 0 | 1  | 2 |
| CIFDSFPPFIYP  | 0 | 0 | 0 | 1 | 5  | 2 |
| CIFDSFPPFIIC  | 0 | 0 | 0 | 0 | 2  | 2 |
| CIFDSFIPFIIC  | 0 | 0 | 0 | 0 | 2  | 2 |
| CIFDSFLPFIMC  | 0 | 0 | 0 | 0 | 1  | 2 |
| CIFDTLPPFNLC  | 0 | 0 | 0 | 0 | 1  | 2 |
| CIFDTLPPFILS  | 0 | 0 | 0 | 0 | 1  | 2 |
| CIFDTHFPFVLC  | 0 | 0 | 0 | 0 | 1  | 2 |
| CIFDTLPPFILR  | 0 | 0 | 0 | 0 | 0  | 2 |
| CVFDSFLPYINT  | 0 | 0 | 0 | 0 | 0  | 2 |
| CIFDSLLPFVFC  | 0 | 0 | 0 | 0 | 0  | 2 |
| CIFDSLLPFVIC  | 0 | 0 | 0 | 1 | 1  | 2 |
| CIFDSWLPPFVLC | 0 | 0 | 0 | 0 | 0  | 2 |
| CIFDSWLPPFVYC | 0 | 0 | 1 | 2 | 20 | 2 |
| CIFDSWLPLIYC  | 0 | 0 | 0 | 0 | 0  | 2 |
| CIFDSWLPIYFC  | 0 | 0 | 0 | 0 | 0  | 2 |
| CIFDTFKPFIFC  | 0 | 0 | 0 | 0 | 2  | 2 |
| CIFDSIFPFIPC  | 0 | 0 | 0 | 0 | 2  | 2 |
| CIFDTLHFILC   | 0 | 0 | 0 | 0 | 2  | 2 |
| CIFDTLPPFIAC  | 0 | 0 | 0 | 0 | 1  | 2 |
| CIFDTLPPFIFF  | 0 | 0 | 0 | 1 | 0  | 2 |
| CIFDTLPPFIFT  | 0 | 0 | 0 | 0 | 0  | 2 |
| CIFDSFLPPFTFC | 0 | 0 | 0 | 0 | 0  | 2 |
| CIFDSFLPPFVCC | 0 | 0 | 0 | 0 | 10 | 2 |

|               |   |   |   |   |    |
|---------------|---|---|---|---|----|
| CIFDSFLSFILC  | 0 | 0 | 0 | 0 | 2  |
| CIFDSFFPFTFC  | 0 | 0 | 0 | 3 | 12 |
| CIFGLFVPIIYC  | 0 | 0 | 0 | 0 | 1  |
| CIFEIHMPYIPC  | 0 | 0 | 0 | 0 | 0  |
| CIFDTLLPLIFC  | 0 | 0 | 0 | 0 | 1  |
| CIFDTLLPFICC  | 0 | 0 | 0 | 0 | 1  |
| CIFDTILPFINC  | 0 | 0 | 0 | 0 | 0  |
| CIFDTFLPSIIC  | 0 | 0 | 0 | 0 | 3  |
| CIFDTFLPSIVC  | 0 | 0 | 0 | 0 | 0  |
| CIFDTFLPSIYC  | 0 | 0 | 0 | 0 | 2  |
| CIFDTFLPYNFC  | 0 | 0 | 0 | 0 | 0  |
| CIFDTFLSFIYC  | 0 | 0 | 0 | 0 | 1  |
| CIFDTFMPPIFC  | 0 | 0 | 0 | 0 | 1  |
| CIFDTFMPYIFC  | 0 | 0 | 0 | 0 | 0  |
| CIFDTFPPFIFC  | 0 | 0 | 0 | 0 | 1  |
| CIFDTFSPFIIC  | 0 | 0 | 0 | 0 | 5  |
| CIFDTFVPPFIVC | 0 | 0 | 0 | 0 | 0  |
| CIFGIHMPFITC  | 0 | 0 | 0 | 0 | 0  |
| CIFGIHMPFILC  | 0 | 0 | 0 | 0 | 3  |
| CIFGIFMPFIFC  | 0 | 0 | 0 | 0 | 0  |
| CIFDVFCPIIIC  | 0 | 0 | 0 | 0 | 0  |
| CIFDTFLPFNYC  | 0 | 0 | 0 | 0 | 0  |
| CIFDTFLPFVVC  | 0 | 0 | 0 | 0 | 0  |
| CIFDTFLPINFC  | 0 | 0 | 0 | 0 | 0  |
| CIFDTMLPFIIC  | 0 | 0 | 0 | 0 | 0  |
| CIFDTWLPIFIC  | 0 | 0 | 0 | 0 | 0  |
| CIFDTYLPFILC  | 0 | 0 | 0 | 0 | 1  |
| CIFDVMPPIFIC  | 0 | 0 | 0 | 1 | 5  |
| CIFETFLPFTFC  | 0 | 0 | 0 | 0 | 0  |
| CIFDVHMPFIIC  | 0 | 0 | 0 | 0 | 0  |
| CIFDVHMPFILC  | 0 | 0 | 0 | 0 | 2  |
| CIFDTMLPFIIC  | 0 | 0 | 0 | 0 | 3  |
| CIFDVHMPLIPC  | 0 | 0 | 0 | 0 | 0  |
| CIFELNFPFIPC  | 0 | 0 | 0 | 1 | 3  |
| CIFDNFFPFIIC  | 0 | 0 | 0 | 0 | 1  |
| CIFDNFLPFILC  | 0 | 0 | 0 | 0 | 1  |
| CIFDNFLTIFC   | 0 | 0 | 0 | 0 | 0  |
| CIFYIHTPFIPC  | 0 | 0 | 0 | 0 | 1  |
| CIFYTFLPIIYC  | 0 | 0 | 0 | 0 | 0  |
| CIIDIHKPYIPC  | 0 | 0 | 0 | 0 | 0  |
| CIIDIHMPFTPC  | 0 | 0 | 0 | 0 | 2  |
| CIIDIHMPLIPC  | 0 | 0 | 0 | 0 | 0  |
| CIIDIHMPYITC  | 0 | 0 | 0 | 0 | 1  |
| CIIDIQMPFIPC  | 0 | 0 | 0 | 0 | 0  |
| CIFYNWLPFIIC  | 0 | 0 | 0 | 0 | 0  |
| CIIDTFMPFIFC  | 0 | 0 | 0 | 0 | 1  |
| CIIDTIMPFIFC  | 0 | 0 | 0 | 0 | 0  |
| CILDIFLPIFIC  | 0 | 0 | 0 | 0 | 0  |
| CILDIFMPFIIC  | 0 | 0 | 0 | 0 | 0  |
| CILDIHMPFIHC  | 0 | 0 | 0 | 0 | 1  |
| CILDLFAPFIYC  | 0 | 0 | 0 | 3 | 4  |
| CILDLFVPIIIC  | 0 | 0 | 0 | 0 | 0  |

|               |   |   |   |   |    |
|---------------|---|---|---|---|----|
| CILDLFVPIIYC  | 0 | 0 | 0 | 0 | 0  |
| CIFYTFLPFILC  | 0 | 0 | 0 | 0 | 1  |
| CIYDINMPFITC  | 0 | 0 | 0 | 0 | 0  |
| CIFDNFMPIIIC  | 0 | 0 | 0 | 0 | 0  |
| CIYDLFAPFIYC  | 0 | 0 | 0 | 0 | 2  |
| CLFDIFYPIFIC  | 0 | 0 | 0 | 0 | 1  |
| CLFDIFYPFILC  | 0 | 0 | 0 | 8 | 6  |
| CLFDIILPIFIC  | 0 | 0 | 0 | 1 | 3  |
| CLFDISCPFIFC  | 0 | 0 | 0 | 0 | 3  |
| CLFDISSPFIIC  | 0 | 0 | 0 | 0 | 0  |
| CLFDIYLPFIIC  | 0 | 0 | 0 | 0 | 2  |
| CLFDLFCDFIFC  | 0 | 0 | 0 | 1 | 1  |
| CLFDLFCFLFIC  | 0 | 0 | 0 | 5 | 1  |
| CLFDLFCPFLCC  | 0 | 0 | 0 | 0 | 0  |
| CLFDLFCPIIIC  | 0 | 0 | 0 | 3 | 4  |
| CLFDLFCPLILC  | 0 | 0 | 0 | 1 | 1  |
| CLFDLFCPSIFC  | 0 | 0 | 0 | 5 | 12 |
| CLFDLFCPYIYC  | 0 | 0 | 0 | 0 | 1  |
| CLFDLFEPIFIC  | 0 | 0 | 0 | 0 | 1  |
| CIYDLFCPIFIC  | 0 | 0 | 0 | 0 | 0  |
| CIIDTILPIFIC  | 0 | 0 | 0 | 0 | 1  |
| CIFYNWLPFIIC  | 0 | 0 | 0 | 0 | 4  |
| CIFYINMPFIHC  | 0 | 0 | 0 | 0 | 0  |
| CIFYIFMPFILC  | 0 | 0 | 0 | 1 | 1  |
| CILDTFLPFIIC  | 0 | 0 | 0 | 0 | 0  |
| CIWDSFVPIIIC  | 0 | 0 | 0 | 0 | 7  |
| CIWDSFVTFILC  | 0 | 0 | 0 | 0 | 4  |
| CIWDSLVPFILC  | 0 | 0 | 0 | 8 | 14 |
| CIWDSVPIIIC   | 0 | 0 | 0 | 2 | 1  |
| CIWDTFVPIIIC  | 0 | 0 | 0 | 0 | 0  |
| CIWGSFVPIIIC  | 0 | 0 | 0 | 3 | 11 |
| CIWDSFVPSIFC  | 0 | 0 | 0 | 0 | 2  |
| CIYDIFVPIIIC  | 0 | 0 | 0 | 0 | 2  |
| CIYDIHKPYIPC  | 0 | 0 | 0 | 0 | 0  |
| CIYDIHKPYITC  | 0 | 0 | 0 | 1 | 0  |
| CIYDIHKPYNPC  | 0 | 0 | 0 | 0 | 0  |
| CIYDIHMPFIIC  | 0 | 0 | 0 | 0 | 0  |
| CILDNWLPFIIC  | 0 | 0 | 0 | 0 | 1  |
| CIFDLFAPFVFC  | 0 | 0 | 0 | 0 | 4  |
| CILDWLWLPFTAC | 0 | 0 | 0 | 4 | 6  |
| CIFNNWLPFIYC  | 0 | 0 | 0 | 3 | 6  |
| CIFGTFLPFIFC  | 0 | 0 | 0 | 0 | 0  |
| CIFGTFLPIIYC  | 0 | 0 | 0 | 0 | 0  |
| CIFGTHMPFIIC  | 0 | 0 | 0 | 0 | 1  |
| CIFHNWLPFIYC  | 0 | 0 | 0 | 1 | 2  |
| CIFNIHMPFILC  | 0 | 0 | 0 | 0 | 0  |
| CIFNNWLPFIIC  | 0 | 0 | 0 | 0 | 0  |
| CIFNSFFPFIIC  | 0 | 0 | 0 | 0 | 4  |
| CIFVTFLPIIIC  | 0 | 0 | 0 | 0 | 0  |
| CIFNTFLPIIIC  | 0 | 0 | 0 | 0 | 1  |
| CIFNTFLPIIYC  | 0 | 0 | 0 | 0 | 0  |
| CIFVIFMPFIIC  | 0 | 0 | 0 | 0 | 1  |

|                |   |   |   |   |    |   |
|----------------|---|---|---|---|----|---|
| CIFVFMPPFIPC   | 0 | 0 | 0 | 0 | 1  | 2 |
| CIFVNWLPIIYC   | 0 | 0 | 0 | 4 | 7  | 2 |
| CLFDIFVPIIYC   | 0 | 0 | 0 | 0 | 0  | 2 |
| CLFDIFVPIIYC   | 0 | 0 | 0 | 0 | 3  | 2 |
| CLFDIFSPFIMC   | 0 | 0 | 0 | 0 | 1  | 2 |
| CIYDNHMPPIIYC  | 0 | 0 | 0 | 0 | 0  | 2 |
| CLFDIFLPIIYC   | 0 | 0 | 0 | 1 | 4  | 2 |
| CLFDIFCPNFIC   | 0 | 0 | 0 | 0 | 0  | 2 |
| CLFDIFLPIIIR   | 0 | 0 | 1 | 0 | 1  | 2 |
| CLFDIFLPIIIS   | 0 | 0 | 0 | 0 | 0  | 2 |
| CLFDIFLPIISIC  | 0 | 0 | 0 | 0 | 0  | 2 |
| CLFDIFLPIITIC  | 0 | 0 | 0 | 5 | 18 | 2 |
| CLFDIFLPIIVCC  | 0 | 0 | 0 | 0 | 0  | 2 |
| CLFDIFLPIIVYC  | 0 | 0 | 0 | 1 | 3  | 2 |
| CLFDIFLPIIIPC  | 0 | 0 | 0 | 0 | 0  | 2 |
| CLFDIFLPIIYC   | 0 | 0 | 0 | 0 | 0  | 2 |
| CLFDIFLPIIKC   | 0 | 0 | 0 | 0 | 0  | 2 |
| CLFDIFLPIIFC   | 0 | 0 | 0 | 1 | 3  | 2 |
| CLFDIFLPIIFC   | 0 | 0 | 0 | 1 | 1  | 2 |
| CLFDGFCDFIFC   | 0 | 0 | 0 | 6 | 2  | 2 |
| CIYDLFSPFIFC   | 0 | 0 | 0 | 1 | 0  | 2 |
| CLFDIFLPIIFF   | 0 | 0 | 0 | 0 | 0  | 2 |
| CIFDNNIPFIFC   | 0 | 0 | 0 | 0 | 0  | 2 |
| CIFDNGLPFIFC   | 0 | 0 | 0 | 1 | 1  | 2 |
| CIFDNHKKPIIYC  | 0 | 0 | 0 | 0 | 2  | 2 |
| CIFDNHMNLIIPC  | 0 | 0 | 0 | 0 | 0  | 2 |
| CIFDNHMPIIHC   | 0 | 0 | 0 | 0 | 0  | 2 |
| CIFDNLLPIIIFC  | 0 | 0 | 0 | 0 | 2  | 2 |
| CIFDNLLPIIIC   | 0 | 0 | 0 | 0 | 1  | 2 |
| CIFDNNMPPIIIC  | 0 | 0 | 0 | 0 | 1  | 2 |
| CLFDIFCPYILC   | 0 | 0 | 0 | 4 | 8  | 2 |
| CIFDNRLPIIIC   | 0 | 0 | 0 | 0 | 1  | 2 |
| CIFDPMMPPIIIC  | 0 | 0 | 0 | 0 | 0  | 2 |
| CIFGNWLPIIIFC  | 0 | 0 | 0 | 0 | 1  | 2 |
| CIFGSFFPIIIFC  | 0 | 0 | 0 | 7 | 5  | 2 |
| CIFGSFLPIIIC   | 0 | 0 | 0 | 0 | 0  | 2 |
| CLFDIFCPLIIFC  | 0 | 0 | 0 | 0 | 3  | 2 |
| CIYDLWLPIITAC  | 0 | 0 | 0 | 1 | 3  | 2 |
| CIYDSFFPIIIFC  | 0 | 0 | 0 | 1 | 7  | 2 |
| CLFDLFFPIIIFC  | 0 | 0 | 0 | 2 | 1  | 2 |
| CIYDSFLPIIVFC  | 0 | 0 | 0 | 0 | 1  | 2 |
| CLFDLFPVPIIIFC | 0 | 0 | 0 | 1 | 12 | 2 |
| CLFDLFPVPIIFC  | 0 | 0 | 0 | 0 | 1  | 2 |
| CLFDLFPVPIIFC  | 0 | 0 | 0 | 0 | 7  | 2 |
| CLFDLFPVPIIFC  | 0 | 0 | 0 | 0 | 3  | 2 |
| CLFDLFPVPIIFC  | 0 | 0 | 0 | 0 | 3  | 2 |
| CLFDLFPVPIIFC  | 0 | 0 | 0 | 0 | 7  | 2 |
| CLFDLFPVPIIFC  | 0 | 0 | 0 | 2 | 5  | 2 |
| CLFDLHLPFITC   | 0 | 0 | 0 | 0 | 2  | 2 |
| CLFDLHLPFITC   | 0 | 0 | 0 | 1 | 13 | 2 |
| CLFDLHLPFITC   | 0 | 0 | 0 | 3 | 4  | 2 |
| CLFDLYCDFIIVC  | 0 | 0 | 0 | 0 | 1  | 2 |

|                |   |   |   |    |    |   |
|----------------|---|---|---|----|----|---|
| CLFDNLPPIIFC   | 0 | 0 | 0 | 2  | 2  | 2 |
| CLFDLFYHFIIC   | 0 | 0 | 0 | 0  | 2  | 2 |
| CLFDLFHPIIIC   | 0 | 0 | 0 | 5  | 3  | 2 |
| CLFDLFFPPTIC   | 0 | 0 | 0 | 0  | 2  | 2 |
| CLFDLFPVPIIIFC | 0 | 0 | 2 | 11 | 12 | 2 |
| CLFDLFPVPIIIFC | 0 | 0 | 0 | 1  | 3  | 2 |
| CLFDLFPVPIIIFC | 0 | 0 | 0 | 9  | 6  | 2 |
| CIYDTFMPIIIFC  | 0 | 0 | 0 | 0  | 3  | 2 |
| CIYGIHMPPIIIFC | 0 | 0 | 0 | 0  | 0  | 2 |
| CLFDHFIDFIIC   | 0 | 0 | 0 | 0  | 7  | 2 |
| CIYHIHKPIIIFC  | 0 | 0 | 0 | 0  | 0  | 2 |
| CKFDTFLPIIIC   | 0 | 0 | 0 | 0  | 1  | 2 |
| CKFDTFLPIIIC   | 0 | 0 | 0 | 0  | 2  | 2 |
| CLDDSFPIIIFC   | 0 | 0 | 0 | 0  | 1  | 2 |
| CLFDLFRPIIIFC  | 0 | 0 | 0 | 0  | 1  | 2 |
| CLFDFFLPIIIFC  | 0 | 0 | 0 | 0  | 2  | 2 |
| CLFDFFVPIIIFC  | 0 | 0 | 0 | 0  | 2  | 2 |
| CIYIHMPIIIFC   | 0 | 0 | 0 | 0  | 0  | 2 |
| CLFDIFLRFIIC   | 0 | 0 | 0 | 0  | 1  | 2 |
| CLFDIFLRFIIC   | 0 | 0 | 0 | 2  | 2  | 2 |
| CLFDIFRPIIIFC  | 0 | 0 | 0 | 15 | 8  | 2 |
| CVFDSFLPSVFC   | 0 | 0 | 0 | 0  | 0  | 2 |
| FDLPIIIFC      | 0 | 0 | 0 | 0  | 1  | 2 |
| CVFDSFLSFIIC   | 0 | 0 | 0 | 2  | 8  | 2 |
| CLFDSFVPIIIFC  | 0 | 0 | 0 | 2  | 9  | 2 |
| CLFDSFVPIIIFC  | 0 | 0 | 0 | 1  | 3  | 2 |
| CLFDSFVPSVFC   | 0 | 0 | 0 | 7  | 6  | 2 |
| CLFDSFLPIIIFC  | 0 | 0 | 0 | 0  | 1  | 2 |
| CTFGTFLPIIIFC  | 0 | 0 | 0 | 0  | 0  | 2 |
| CLFDPFLPIIIFC  | 0 | 0 | 0 | 2  | 6  | 2 |
| CLFDPFLPIIIFC  | 0 | 0 | 0 | 0  | 1  | 2 |
| CLFDPFLSFIIC   | 0 | 0 | 0 | 0  | 5  | 2 |
| CLFDPFLSFIIC   | 0 | 0 | 0 | 25 | 5  | 2 |
| CLFDPFVPIIIFC  | 0 | 0 | 0 | 0  | 2  | 2 |
| CLFDPHFPIIIFC  | 0 | 0 | 0 | 0  | 2  | 2 |
| CLFDRFLPIIIFC  | 0 | 0 | 0 | 0  | 0  | 2 |
| CLFDSFAPFIIC   | 0 | 0 | 0 | 1  | 2  | 2 |
| CLFDSFAPFVFC   | 1 | 0 | 0 | 6  | 15 | 2 |
| CLFDSFVPFTYC   | 0 | 0 | 0 | 1  | 1  | 2 |
| CLFDSFVPFIFR   | 0 | 1 | 0 | 0  | 1  | 2 |
| CLYDSYLPYIIFC  | 0 | 0 | 0 | 0  | 1  | 2 |
| CLYDTFLPIIIFC  | 0 | 0 | 0 | 0  | 2  | 2 |
| CLYDPFLPIIIFC  | 0 | 0 | 0 | 0  | 1  | 2 |
| CNFDIHMPYIIFC  | 0 | 0 | 0 | 0  | 3  | 2 |
| CLFGSFLPIIIFC  | 0 | 0 | 0 | 4  | 2  | 2 |
| CLFDSFLPIIIFC  | 0 | 0 | 0 | 0  | 1  | 2 |
| CLFDSFLPYILC   | 0 | 0 | 0 | 1  | 9  | 2 |
| CLFDSFLSFIIC   | 0 | 0 | 0 | 3  | 3  | 2 |
| CLFDSFLTPIIIFC | 0 | 0 | 0 | 1  | 0  | 2 |
| CLFDSFMPIIIFC  | 0 | 0 | 0 | 0  | 2  | 2 |
| CLFDSFVAFIIFC  | 0 | 0 | 0 | 1  | 4  | 2 |
| CLFDSFLPIIIFC  | 0 | 0 | 0 | 0  | 0  | 2 |

|               |   |   |    |    |    |   |
|---------------|---|---|----|----|----|---|
| CLFDSFVPAFC   | 0 | 0 | 1  | 9  | 23 | 2 |
| CLFDSFDPFVFC  | 0 | 0 | 0  | 7  | 5  | 2 |
| CLFDSFGPFIFC  | 0 | 0 | 0  | 1  | 2  | 2 |
| CLFDSFIPFIYC  | 0 | 0 | 0  | 0  | 2  | 2 |
| CLFDSFIPFVLC  | 0 | 0 | 0  | 0  | 4  | 2 |
| CLFGIFCPFILC  | 0 | 0 | 0  | 6  | 11 | 2 |
| CLFGIFLPPFVFC | 0 | 0 | 0  | 0  | 0  | 2 |
| CLFGLFFPFIIC  | 0 | 0 | 0  | 1  | 0  | 2 |
| CLFGLFVPFVFC  | 0 | 0 | 2  | 4  | 4  | 2 |
| CLFGLHLPFIFC  | 0 | 0 | 0  | 0  | 5  | 2 |
| CLFGLYCDFIFC  | 0 | 0 | 0  | 2  | 0  | 2 |
| CLFDVFCGFIFC  | 0 | 0 | 0  | 9  | 8  | 2 |
| CLFDTFVTFIFC  | 0 | 0 | 0  | 1  | 11 | 2 |
| CLFDTFVRFIFC  | 0 | 0 | 0  | 0  | 5  | 2 |
| CLFDTFVQFIIC  | 0 | 0 | 0  | 0  | 1  | 2 |
| CLFDSLPPFIYC  | 0 | 1 | 0  | 2  | 34 | 2 |
| CLFDSSLPPFIPC | 0 | 0 | 0  | 0  | 3  | 2 |
| CLFDSSVPFILC  | 0 | 0 | 0  | 0  | 0  | 2 |
| CLFDSSVPFVFC  | 0 | 0 | 1  | 4  | 11 | 2 |
| CLFDSYCDFIFC  | 0 | 0 | 0  | 1  | 0  | 2 |
| CLFELFCPFIFC  | 0 | 0 | 0  | 1  | 2  | 2 |
| CLFDVFCDFTFC  | 0 | 0 | 0  | 8  | 14 | 2 |
| CLFDTFYFTPC   | 0 | 0 | 0  | 1  | 5  | 2 |
| CLFDSLPPFICC  | 0 | 0 | 0  | 3  | 22 | 2 |
| CLFDSFLHFIFC  | 0 | 0 | 0  | 0  | 1  | 2 |
| CLFDSFLLFIFC  | 0 | 0 | 0  | 0  | 0  | 2 |
| CLFDSFLPFIFS  | 0 | 0 | 0  | 0  | 0  | 2 |
| CLFDSFLPFIGC  | 0 | 0 | 3  | 3  | 10 | 2 |
| CLFDSLFPFIVC  | 0 | 0 | 20 | 17 | 10 | 2 |
| CLFGSFVPFIFC  | 0 | 0 | 0  | 4  | 16 | 2 |
| CLFDSLPPFIVC  | 0 | 0 | 0  | 5  | 4  | 2 |
| CLFDVFCDFNFC  | 0 | 0 | 0  | 1  | 1  | 2 |
| CLFDTHFPFIFC  | 0 | 0 | 0  | 0  | 0  | 2 |
| CLFDTHFPFIPC  | 0 | 0 | 0  | 1  | 4  | 2 |
| CLFDTHFPFIVC  | 0 | 0 | 0  | 0  | 0  | 2 |
| CLFDTHMPFIPC  | 0 | 0 | 0  | 0  | 0  | 2 |
| CLFDTILPFILC  | 0 | 0 | 5  | 13 | 4  | 2 |
| CLFDVFCDFISC  | 1 | 0 | 0  | 11 | 7  | 2 |
| CLYDTFLPFIIC  | 0 | 0 | 0  | 0  | 1  | 2 |
| CLYDSFSPFIIC  | 0 | 0 | 0  | 0  | 0  | 2 |
| CVFDSFLPFVSC  | 0 | 0 | 0  | 1  | 3  | 2 |
| CLFVSFVPFIFC  | 0 | 0 | 0  | 2  | 4  | 2 |
| CLFVTFLPFIFC  | 0 | 0 | 0  | 3  | 4  | 2 |
| CLFVTFVPFIFC  | 0 | 0 | 0  | 1  | 3  | 2 |
| CLFYSFLPFILC  | 0 | 0 | 0  | 1  | 1  | 2 |
| CLFYSFVPFIFC  | 0 | 0 | 0  | 1  | 4  | 2 |
| CLFYTFLPFILC  | 0 | 0 | 0  | 0  | 0  | 2 |
| CLIDIFLPFIYC  | 0 | 0 | 0  | 0  | 0  | 2 |
| CLIDLFCPFIFC  | 0 | 0 | 0  | 4  | 5  | 2 |
| CLIDLHLPFIFC  | 0 | 0 | 0  | 1  | 1  | 2 |
| CLIDTFLPFIYC  | 0 | 0 | 0  | 0  | 0  | 2 |
| CLLDIFCPFIFC  | 0 | 0 | 0  | 0  | 2  | 2 |

|               |   |   |   |    |    |   |
|---------------|---|---|---|----|----|---|
| CLLDSFLPFIYC  | 0 | 0 | 0 | 0  | 0  | 2 |
| CLLDVFCDFIFC  | 0 | 0 | 0 | 12 | 7  | 2 |
| CLYDIHMPFIIC  | 0 | 0 | 0 | 0  | 0  | 2 |
| CLYDSFMPFILC  | 0 | 0 | 0 | 0  | 2  | 2 |
| CVYDTFVPFIFC  | 0 | 0 | 0 | 0  | 5  | 2 |
| CVYDTSVPPFIIC | 0 | 0 | 0 | 0  | 1  | 2 |
| CVYDLFLPFFYC  | 0 | 1 | 0 | 0  | 7  | 2 |
| CTFHHTLPPFIFC | 0 | 0 | 0 | 2  | 4  | 2 |
| CVFVDFPFILC   | 0 | 0 | 0 | 0  | 0  | 2 |
| CLSDLFCPFILC  | 0 | 0 | 0 | 0  | 0  | 2 |
| CLSDSFLPFIVC  | 0 | 0 | 0 | 1  | 0  | 2 |
| CLSDSFVPFVFC  | 0 | 0 | 0 | 3  | 7  | 2 |
| CLSDIFCPFIYC  | 0 | 0 | 0 | 0  | 1  | 2 |
| CLNDSYLPFILC  | 0 | 0 | 0 | 0  | 0  | 2 |
| CLNDTFDPPFIIC | 0 | 0 | 0 | 0  | 1  | 2 |
| CLYDLFFPFIIC  | 0 | 0 | 0 | 1  | 1  | 2 |
| CLYGSFLPFIYC  | 0 | 0 | 0 | 0  | 1  | 2 |
| CLYDYLPFIFC   | 0 | 0 | 0 | 0  | 0  | 2 |
| CLYDYFLPFIYC  | 0 | 0 | 0 | 0  | 1  | 2 |
| CLYDSFFPFIIC  | 0 | 0 | 0 | 0  | 0  | 2 |
| CLYDSFKPFIFC  | 0 | 0 | 0 | 0  | 1  | 2 |
| CLYDSFLLFIFC  | 0 | 0 | 0 | 3  | 5  | 2 |
| CLYDSFLPFLCC  | 0 | 0 | 1 | 0  | 11 | 2 |
| CLYDSFLPFTLC  | 0 | 0 | 0 | 0  | 0  | 2 |
| CLYDSFLPFTYC  | 0 | 0 | 0 | 0  | 2  | 2 |
| CLYDSFLPFVIC  | 0 | 0 | 0 | 2  | 8  | 2 |
| CLYDSFLPFVLC  | 0 | 0 | 0 | 1  | 13 | 2 |
| CLYDSFLPYIIC  | 0 | 0 | 0 | 0  | 0  | 2 |
| FDTFLPFIIC    | 0 | 0 | 0 | 0  | 1  | 2 |
| CNFDIHKPIIPC  | 0 | 0 | 0 | 0  | 0  | 2 |
| CNFDIHIPFIPC  | 0 | 0 | 0 | 0  | 0  | 2 |
| FDLFIIPFVFC   | 0 | 0 | 1 | 2  | 11 | 2 |
| CLFVIFLPFIFC  | 0 | 0 | 0 | 3  | 7  | 2 |
| CLYDPFLPFIIC  | 0 | 0 | 0 | 0  | 0  | 2 |
| CLYDPFLSFIFC  | 0 | 0 | 0 | 3  | 3  | 2 |
| FDIFLPFIIC    | 0 | 0 | 0 | 0  | 2  | 2 |
| FDLFCPFVMC    | 0 | 0 | 0 | 5  | 1  | 2 |
| FDLFCPFVVC    | 0 | 0 | 0 | 0  | 0  | 2 |
| FDLFVPFIFC    | 0 | 0 | 0 | 0  | 2  | 2 |
| CNFDIFLPFIIC  | 0 | 0 | 0 | 0  | 1  | 2 |
| FDLFVPFVFC    | 0 | 0 | 0 | 1  | 3  | 2 |
| FDLHLPFIFC    | 0 | 0 | 1 | 0  | 2  | 2 |
| CLYVSFLPFIFC  | 0 | 0 | 1 | 3  | 10 | 2 |
| FDSFLPFITC    | 0 | 0 | 0 | 0  | 1  | 2 |
| CNFDIFLPFIFC  | 0 | 0 | 1 | 1  | 1  | 2 |
| CLFDSYLPFILC  | 0 | 0 | 0 | 4  | 5  | 2 |
| CLFDSYLPYIFC  | 0 | 0 | 0 | 0  | 0  | 2 |
| CLFDTFCPFIIC  | 1 | 0 | 0 | 0  | 2  | 2 |
| CTFDTHMPFIYC  | 0 | 0 | 0 | 2  | 6  | 2 |
| CPYDSFLPFIIC  | 0 | 0 | 0 | 0  | 0  | 2 |
| CPYDSFLPFILC  | 0 | 0 | 0 | 0  | 2  | 2 |
| CPFDVFCDFIFC  | 0 | 0 | 0 | 19 | 7  | 2 |

|               |   |   |   |    |    |   |
|---------------|---|---|---|----|----|---|
| CQFDTLFPFIFC  | 0 | 0 | 0 | 0  | 1  | 2 |
| CQFDLHLPFIFC  | 0 | 0 | 0 | 0  | 5  | 2 |
| CPFDPLFSFIPC  | 0 | 0 | 0 | 16 | 7  | 2 |
| CPFDLFLPFIPC  | 0 | 0 | 0 | 0  | 0  | 2 |
| CPFDIFLPFIPC  | 0 | 0 | 1 | 0  | 1  | 2 |
| CNFDPHFIFIPC  | 0 | 0 | 0 | 1  | 4  | 2 |
| CNFDTFMPFIFC  | 0 | 0 | 0 | 0  | 0  | 2 |
| CNFHIIKPFIPC  | 0 | 0 | 0 | 0  | 0  | 2 |
| CNIHIMPFIPC   | 0 | 0 | 0 | 0  | 0  | 2 |
| CTFDIFLPIIHC  | 0 | 0 | 0 | 4  | 15 | 2 |
| CTFDIFLPIFILS | 0 | 0 | 0 | 0  | 2  | 2 |
| CLFDTFPPFIIC  | 0 | 0 | 0 | 1  | 1  | 2 |
| CTFDIFLPIFIMC | 0 | 0 | 0 | 0  | 0  | 2 |
| CTFDPHFIFIPC  | 0 | 0 | 0 | 0  | 3  | 2 |
| CTFDRFLPFIFC  | 0 | 0 | 0 | 1  | 2  | 2 |
| CTFDSLPLPFIYC | 0 | 0 | 0 | 3  | 9  | 2 |
| CTFDSWLPFIPC  | 0 | 0 | 0 | 0  | 3  | 2 |
| CTFDTFLLFIFC  | 0 | 0 | 0 | 0  | 2  | 2 |
| CTFDTFVPPFIFC | 0 | 0 | 0 | 0  | 1  | 2 |
| CTFDTFVPPFIMC | 0 | 0 | 0 | 0  | 4  | 2 |
| CTFDTFVPPFIRC | 0 | 0 | 0 | 0  | 4  | 2 |
| CTFDTFVPLIIC  | 0 | 0 | 0 | 0  | 7  | 2 |
| CTFDTFVPLIIC  | 0 | 0 | 0 | 0  | 1  | 2 |
| CTFDTFVPLIIC  | 0 | 0 | 0 | 0  | 1  | 2 |
| CTFDTFVPLIIC  | 0 | 0 | 0 | 0  | 2  | 2 |
| CTFDTFVPLIIC  | 0 | 0 | 1 | 0  | 0  | 2 |
| CNWDSEVPPFIFC | 0 | 0 | 0 | 0  | 1  | 2 |
| CNYDIHKPFIFC  | 0 | 0 | 0 | 0  | 2  | 2 |
| CSYDLFLPFIFC  | 0 | 0 | 0 | 5  | 17 | 2 |
| CSFDTFVPPFIFC | 0 | 0 | 0 | 0  | 3  | 2 |
| CSFDTFVPPFIFC | 0 | 0 | 0 | 0  | 1  | 2 |
| CRFDSFLPFIFC  | 0 | 0 | 0 | 0  | 2  | 2 |
| CRFDSFLPFIFC  | 0 | 0 | 0 | 0  | 1  | 2 |
| CTFDAFLPFIFC  | 0 | 0 | 0 | 0  | 3  | 2 |
| CSFDSFLPFVIFC | 0 | 0 | 0 | 0  | 3  | 2 |
| CSFDLFLPFIFC  | 0 | 0 | 0 | 0  | 1  | 2 |
| CSFDLFLPFIFC  | 0 | 0 | 0 | 0  | 1  | 2 |
| CSFDLFLPFIFC  | 0 | 0 | 0 | 0  | 2  | 2 |
| CSFDLFLPFIFC  | 0 | 0 | 0 | 0  | 0  | 2 |
| CSFDLFLPFIFC  | 0 | 0 | 0 | 0  | 0  | 2 |
| CTFDIFCPFILC  | 0 | 0 | 0 | 0  | 1  | 2 |
| CNYDIHMPFIFC  | 0 | 0 | 0 | 0  | 0  | 2 |
| CNYDIHMPYIFC  | 0 | 0 | 0 | 0  | 1  | 2 |
| CNYDIQMPFIFC  | 0 | 0 | 0 | 0  | 0  | 2 |
| CPFDIFCPFIFC  | 0 | 0 | 0 | 0  | 3  | 2 |
| CNLDIHMPPFIFC | 0 | 0 | 0 | 0  | 0  | 2 |
| CTFDIFIPFVLC  | 0 | 0 | 0 | 1  | 3  | 2 |
| CTFDIFLPIFIPC | 0 | 0 | 0 | 0  | 2  | 2 |
| CTFDIFLPIFIPC | 0 | 0 | 0 | 0  | 4  | 2 |
| CTFDIFLPIYIFC | 0 | 0 | 1 | 5  | 8  | 2 |
| CTFDIFLPSILC  | 0 | 0 | 0 | 2  | 7  | 2 |
| CTFDLFLPIYIC  | 0 | 0 | 0 | 0  | 3  | 2 |

|               |   |   |   |   |    |   |
|---------------|---|---|---|---|----|---|
| CTFDLFLTFIYC  | 0 | 0 | 0 | 0 | 2  | 2 |
| CTFDLFSPIYIC  | 0 | 0 | 0 | 0 | 0  | 2 |
| CTFDLFPFVLC   | 0 | 0 | 1 | 4 | 10 | 2 |
| CTFDLILPFIFC  | 0 | 0 | 0 | 0 | 3  | 2 |
| CTFDLILPFIFC  | 0 | 0 | 0 | 1 | 2  | 2 |
| CTFDLILPFIFC  | 0 | 0 | 0 | 0 | 1  | 2 |
| CTFDLILPFIFC  | 0 | 0 | 0 | 0 | 2  | 2 |
| CTFDLILPFIFC  | 0 | 0 | 0 | 0 | 0  | 2 |
| CTFDLILPFIFC  | 0 | 0 | 0 | 0 | 0  | 2 |
| CTFDLILPFIFC  | 0 | 0 | 0 | 0 | 0  | 2 |
| CTFDLILPFIFC  | 0 | 0 | 0 | 0 | 5  | 2 |
| CTFDLILPFIFC  | 0 | 0 | 0 | 0 | 0  | 2 |
| CTFDLILPFIFC  | 0 | 0 | 1 | 0 | 2  | 2 |
| CTFDLILPFIFC  | 0 | 0 | 0 | 1 | 2  | 2 |
| CTFDLILPFIFC  | 0 | 0 | 0 | 1 | 7  | 2 |
| CTFDLILPFIFC  | 0 | 0 | 0 | 0 | 4  | 2 |
| CLFDTFVPPFIFC | 2 | 0 | 0 | 3 | 6  | 2 |
| CLFDTFVPPFIFC | 0 | 0 | 0 | 0 | 0  | 2 |
| CLFDTFVPPFIFC | 0 | 0 | 0 | 0 | 0  | 2 |
| CLFDTFVPPFIFC | 0 | 0 | 0 | 3 | 5  | 2 |
| CLFDTFVPPFIFC | 0 | 0 | 0 | 0 | 1  | 2 |
| CLFDTFVPPFIFC | 0 | 0 | 0 | 0 | 2  | 2 |
| CLFDTFVPPFIFC | 0 | 0 | 0 | 0 | 3  | 2 |
| CTFDLFLPFIFC  | 0 | 0 | 0 | 0 | 0  | 2 |
| CLFDSLPLPFIFC | 0 | 1 | 0 | 3 | 5  | 2 |
| CNFDLFPFIFC   | 0 | 0 | 0 | 0 | 1  | 2 |
| CLFDSLPLPFIFC | 0 | 0 | 2 | 3 | 14 | 2 |
| CNFDNWHPPFIFC | 0 | 0 | 0 | 0 | 0  | 2 |
| CTFDLFLPFIFW  | 0 | 0 | 0 | 1 | 1  | 2 |
| CTFDLFLPFIFC  | 0 | 0 | 0 | 0 | 1  | 2 |
| CTFDIFLPLIFC  | 0 | 0 | 0 | 0 | 6  | 2 |
| CTFDIFLPIYIFC | 1 | 0 | 0 | 0 | 2  | 2 |
| CTFDIFLPIYIFC | 0 | 0 | 0 | 0 | 0  | 2 |
| CTFDIFLPIYIFC | 0 | 0 | 0 | 0 | 0  | 2 |
| CTFDIFLPIYIFC | 0 | 0 | 0 | 4 | 2  | 2 |
| CTFDIFLPIYIFC | 0 | 0 | 0 | 4 | 1  | 2 |
| CTFDIFLPIYIFC | 0 | 0 | 0 | 2 | 10 | 2 |
| CTFDIFLPIYIFC | 0 | 0 | 0 | 0 | 0  | 2 |
| CTFDIFLPIYIFC | 0 | 0 | 0 | 1 | 1  | 2 |
| CTFDIFLPIYIFC | 0 | 0 | 0 | 0 | 0  | 2 |
| CTFDIFLPIYIFC | 0 | 0 | 0 | 7 | 11 | 2 |
| CTFDIFLPIYIFC | 0 | 0 | 1 | 0 | 11 | 2 |
| CTFDIFLPIYIFC | 0 | 0 | 0 | 0 | 1  | 2 |
| CTFDIFLPIYIFC | 1 | 0 | 0 | 7 | 7  | 2 |
| CTFDIFLPIYIFC | 0 | 0 | 0 | 0 | 0  | 2 |
| CTFDIFLPIYIFC | 0 | 0 | 1 | 6 | 5  | 2 |
| CNFDLFSPIYIFC | 0 | 0 | 0 | 0 | 0  | 2 |
| CTFDVFCPIYIFC | 0 | 0 | 0 | 1 | 1  | 2 |
| CTFDVFCPIYIFC | 0 | 0 | 0 | 0 | 1  | 2 |
| CTFDVFCPIYIFC | 0 | 0 | 0 | 2 | 1  | 2 |
| CTFDVFCPIYIFC | 0 | 0 | 0 | 1 | 5  | 2 |
| CTFDVFCPIYIFC | 0 | 1 | 0 | 0 | 4  | 2 |
| CTFDLFPFIFC   | 0 | 0 | 0 | 2 | 8  | 2 |

|               |   |   |    |    |    |   |
|---------------|---|---|----|----|----|---|
| CTFDIHIPFIPC  | 0 | 0 | 0  | 0  | 0  | 2 |
| CTFDINMPFIPC  | 0 | 0 | 0  | 0  | 0  | 2 |
| CTFDIYLPFIPC  | 0 | 0 | 0  | 0  | 0  | 2 |
| CTFDLFCPFIPC  | 0 | 0 | 0  | 0  | 2  | 2 |
| CTFDLFFPFIPC  | 0 | 0 | 0  | 1  | 5  | 2 |
| CTFDNWLPLIYC  | 0 | 0 | 0  | 0  | 0  | 2 |
| CTFDLFIPIFIPC | 0 | 0 | 0  | 3  | 11 | 2 |
| CTFDLFLAFIFC  | 0 | 0 | 0  | 0  | 3  | 2 |
| CTFDLFLHFIFC  | 0 | 0 | 0  | 0  | 0  | 2 |
| CTFDLFAPIFIPC | 0 | 0 | 0  | 1  | 3  | 2 |
| CTFDNQPFIFC   | 0 | 0 | 0  | 0  | 0  | 2 |
| CTFDNWLPIFIPC | 0 | 0 | 0  | 0  | 0  | 2 |
| CVYDTFVPIFIPC | 0 | 0 | 0  | 0  | 0  | 2 |
| CVYDSLPIFIPC  | 0 | 0 | 0  | 0  | 1  | 2 |
| CVYDSLFPVFLC  | 0 | 0 | 0  | 2  | 6  | 2 |
| CTYDIHMPFIPC  | 0 | 0 | 0  | 0  | 1  | 2 |
| CTFVTFPIFIPC  | 0 | 0 | 1  | 1  | 14 | 2 |
| CTFYLPPIFIPC  | 0 | 0 | 0  | 1  | 7  | 2 |
| CTIDLFPFIYC   | 0 | 0 | 0  | 0  | 1  | 2 |
| CTIDLPLPIFIPC | 0 | 0 | 0  | 0  | 0  | 2 |
| CTLDIFLPFILC  | 0 | 1 | 0  | 5  | 7  | 2 |
| CTLDLPLPIFIPC | 0 | 0 | 0  | 0  | 2  | 2 |
| CTYDIFLPFILC  | 0 | 0 | 0  | 1  | 6  | 2 |
| CTLDTFLPFILC  | 0 | 0 | 0  | 0  | 3  | 2 |
| CTSDFLPFIIC   | 0 | 0 | 0  | 0  | 0  | 2 |
| CTSDFHPFITC   | 0 | 0 | 1  | 2  | 4  | 2 |
| CTWDLFPFILC   | 1 | 0 | 15 | 49 | 28 | 2 |
| CTWDSFVPIFIPC | 0 | 0 | 0  | 0  | 1  | 2 |
| CTWDSFVPIFIPC | 0 | 0 | 0  | 0  | 0  | 2 |
| CTWDSFVPIFIPC | 0 | 0 | 0  | 0  | 0  | 2 |
| CTLDTHLPFIYC  | 0 | 0 | 1  | 5  | 5  | 2 |
| CTWDSFVPLIFC  | 0 | 0 | 0  | 0  | 1  | 2 |
| CVFDIHMPIFIPC | 0 | 0 | 0  | 0  | 1  | 2 |
| CVFDLMPFIIC   | 0 | 0 | 0  | 0  | 1  | 2 |
| CVFDIFCPFTFC  | 0 | 0 | 0  | 0  | 0  | 2 |
| CTYDLYLPFIYC  | 0 | 0 | 0  | 1  | 0  | 2 |
| CVCDIFVPIFIPC | 0 | 0 | 0  | 0  | 0  | 2 |
| CVFALFPFIYC   | 0 | 0 | 0  | 0  | 2  | 2 |
| CVFDCFLPIFIPC | 0 | 0 | 0  | 0  | 0  | 2 |
| CVFDFHMPFIPC  | 0 | 0 | 0  | 0  | 1  | 2 |
| CVFDIFCPFIYC  | 0 | 0 | 0  | 0  | 2  | 2 |
| CTYDLPLPIFIPC | 0 | 0 | 0  | 0  | 1  | 2 |
| CVFDIFCPFIYC  | 0 | 0 | 0  | 0  | 3  | 2 |
| CVFDIFIPC     | 0 | 0 | 0  | 0  | 5  | 2 |
| CVFDIFMPFIYC  | 0 | 0 | 0  | 0  | 0  | 2 |
| CVFDIFMPVFLC  | 0 | 0 | 0  | 3  | 1  | 2 |
| CVFDIFVPIFIPC | 0 | 0 | 0  | 0  | 3  | 2 |
| CVFDIFVPIFIPC | 0 | 0 | 0  | 0  | 0  | 2 |
| CVFDIHMPIFIPC | 0 | 0 | 0  | 0  | 2  | 2 |
| CVFDIHMPIFIPS | 0 | 0 | 0  | 0  | 1  | 2 |
| CVFDIHMPSIPC  | 0 | 0 | 0  | 1  | 4  | 2 |
| CVFDILMPFIPC  | 0 | 0 | 0  | 0  | 1  | 2 |

|                |   |   |   |   |    |    |   |
|----------------|---|---|---|---|----|----|---|
| CVFDLFPVPIFIPC | 0 | 0 | 0 | 0 | 1  | 2  |   |
| CVFDLFPFTFC    | 0 | 0 | 1 | 3 | 4  | 2  |   |
| CVFDISIPVFLC   | 0 | 0 | 1 | 2 | 4  | 2  |   |
| CVFDIYIPVFLC   | 0 | 0 | 1 | 2 | 3  | 2  |   |
| CVFDLCLPIFIPC  | 0 | 0 | 0 | 0 | 1  | 2  |   |
| CVFDLFCPFVFLC  | 0 | 0 | 0 | 0 | 0  | 2  |   |
| CVFDLFDPIFIPC  | 0 | 0 | 0 | 0 | 0  | 17 | 2 |
| CVFDLFFPIFIPC  | 0 | 0 | 0 | 0 | 3  | 2  |   |
| CVFDLFFTFIFC   | 0 | 0 | 0 | 0 | 0  | 2  |   |
| CVFDLFLHPIFIPC | 0 | 0 | 0 | 0 | 0  | 2  |   |
| CVFDLFLPFFFC   | 0 | 0 | 0 | 0 | 1  | 2  |   |
| CVFDLFLPFTSC   | 0 | 0 | 0 | 7 | 17 | 2  |   |
| CVFDLFLPLIIC   | 0 | 0 | 0 | 0 | 0  | 2  |   |
| CVFDLFLPVIFC   | 0 | 0 | 0 | 0 | 1  | 2  |   |
| CVFDLFLPYIIC   | 0 | 0 | 0 | 0 | 0  | 2  |   |
| CVFDLFLRFIFC   | 0 | 0 | 0 | 0 | 1  | 2  |   |
| CVFDLFSPIFIPC  | 0 | 0 | 0 | 0 | 1  | 2  |   |
| CVFDLFSPIFIPC  | 0 | 0 | 0 | 0 | 0  | 2  |   |
| CVFDLLLPFIYC   | 0 | 0 | 0 | 0 | 1  | 2  |   |
| CVFDLFPVPIFIPC | 0 | 0 | 0 | 0 | 0  | 2  |   |
| CVFDLFPVPIFIPC | 0 | 0 | 0 | 0 | 1  | 2  |   |
| CVFDLFWPIFIPC  | 0 | 0 | 0 | 0 | 3  | 2  |   |
| CVFDLHCPFIIC   | 0 | 0 | 0 | 2 | 18 | 2  |   |
| CVFDLHCPFTFC   | 0 | 0 | 2 | 4 | 4  | 2  |   |
| CVFDLHMPFIPC   | 0 | 0 | 0 | 0 | 1  | 2  |   |
| CVFDLLLPFILC   | 0 | 0 | 0 | 0 | 2  | 2  |   |
| CVFDLLLPFIYC   | 0 | 0 | 0 | 0 | 0  | 2  |   |
| CVFDNPLPIFIPC  | 0 | 0 | 0 | 0 | 0  | 2  |   |
| CVFDLPLPIFIPC  | 0 | 0 | 0 | 0 | 2  | 2  |   |
| CVFDLWLPPIFIPC | 0 | 0 | 0 | 0 | 1  | 2  |   |
| CVFDLWLPFTAC   | 0 | 0 | 0 | 6 | 6  | 2  |   |
| CVFDLWLPFTPC   | 0 | 0 | 0 | 0 | 0  | 2  |   |
| CVFDLYLPFIYC   | 0 | 0 | 0 | 0 | 0  | 2  |   |
| CVFDMFLPIFIPC  | 0 | 0 | 0 | 0 | 0  | 2  |   |
| CTYDLPLPIFIPC  | 0 | 0 | 0 | 1 | 3  | 2  |   |
| CVFDNPLPIFIPC  | 0 | 1 | 0 | 0 | 3  | 2  |   |
| CVFDPFLPIFIPC  | 0 | 0 | 0 | 0 | 3  | 2  |   |
| CVFDYLLPIFIPC  | 0 | 0 | 0 | 3 | 0  | 2  |   |
| CVFDSFPIFIPC   | 0 | 0 | 0 | 0 | 0  | 2  |   |
| CVFDSFPIFIPC   | 0 | 0 | 0 | 0 | 0  | 2  |   |
| CVFDSFLLPIFIPC | 0 | 0 | 0 | 0 | 0  | 2  |   |
| CVFDSFLPFELC   | 0 | 0 | 1 | 1 | 5  | 2  |   |
| CVFDSFLPFFLC   | 0 | 0 | 0 | 0 | 1  | 2  |   |
| CVFDSFLPFIFR   | 0 | 0 | 0 | 0 | 0  | 2  |   |
| CVFDSFLPFIFR   | 0 | 0 | 0 | 0 | 0  | 2  |   |
| CVFDSFLPFIFR   | 0 | 0 | 0 | 0 | 0  | 2  |   |
| CVFDSFLPFVCC   | 0 | 0 | 0 | 1 | 1  | 2  |   |
| CVFDSFLHPIFIPC | 0 | 0 | 0 | 0 | 1  | 2  |   |
| CVFDSLLPIIIC   | 0 | 0 | 0 | 0 | 0  | 2  |   |
| CVFDSLLPLIFC   | 0 | 0 | 0 | 5 | 11 | 2  |   |
| CVFDSLPPFIYC   | 0 | 0 | 0 | 3 | 8  | 2  |   |
| CVFDVICPIFIPC  | 0 | 0 | 0 | 0 | 1  | 2  |   |
| CVFDSFPIFIPC   | 0 | 0 | 0 | 0 | 1  | 2  |   |

|               |   |   |   |   |    |   |
|---------------|---|---|---|---|----|---|
| CVFDSFFPFITC  | 0 | 0 | 0 | 1 | 3  | 2 |
| CVFDSIMPFIIIC | 0 | 0 | 0 | 0 | 1  | 2 |
| CVFDSFLTFFIMC | 0 | 0 | 0 | 0 | 0  | 2 |
| CVFDSFMPFIVC  | 0 | 0 | 0 | 0 | 1  | 2 |
| CVFDSFMPYIIC  | 0 | 0 | 0 | 0 | 1  | 2 |
| CVFDSFVPLIIC  | 0 | 0 | 0 | 0 | 0  | 2 |
| CVFDSFWPFIPIC | 0 | 0 | 0 | 0 | 1  | 2 |
| CVFDSILPFIFC  | 0 | 0 | 0 | 0 | 1  | 2 |
| CVFDSIMPIIIC  | 0 | 0 | 0 | 0 | 1  | 2 |
| CVFDSCLPFIFC  | 0 | 0 | 0 | 0 | 0  | 2 |
| CVFDSFLTFFITC | 0 | 0 | 0 | 0 | 0  | 2 |
| CVFDSLLPFIFS  | 0 | 0 | 0 | 0 | 1  | 2 |
| CVFDSFLPFVLR  | 0 | 0 | 0 | 0 | 2  | 2 |
| CVFDSFLPFVIS  | 0 | 0 | 0 | 0 | 0  | 2 |
| CVFDPLLPFIFC  | 0 | 0 | 1 | 4 | 5  | 2 |
| CVFDRFLPFILC  | 0 | 0 | 0 | 0 | 0  | 2 |
| CVFDVYCPFIFC  | 0 | 0 | 0 | 2 | 6  | 2 |
| CVFEIHMPFIPC  | 0 | 0 | 0 | 0 | 1  | 2 |
| CVFNSWLPFVFC  | 0 | 0 | 0 | 0 | 0  | 2 |
| CVFELFLPFTFC  | 0 | 0 | 0 | 1 | 2  | 2 |
| CVFDSWLPFAFC  | 0 | 0 | 0 | 0 | 2  | 2 |
| CVFDSWLPFICC  | 0 | 0 | 0 | 0 | 0  | 2 |
| CVFDSWLPFVVC  | 0 | 0 | 0 | 0 | 3  | 2 |
| CVFDSWLPPLIIC | 0 | 0 | 0 | 0 | 0  | 2 |
| CVFDSWLPPLVFC | 0 | 0 | 0 | 2 | 0  | 2 |
| CVFDSWLPVSYC  | 0 | 0 | 0 | 2 | 4  | 2 |
| CVFDSYLPFIPC  | 0 | 0 | 0 | 0 | 2  | 2 |
| CVFDSYLPFISC  | 0 | 0 | 0 | 0 | 0  | 2 |
| CVFDSYLPFNIC  | 0 | 0 | 0 | 0 | 0  | 2 |
| CVFDTLFPFIVC  | 0 | 0 | 0 | 1 | 2  | 2 |
| CVFDTLFPVFC   | 0 | 0 | 0 | 0 | 2  | 2 |
| CVFDTLFPVIFC  | 0 | 0 | 0 | 0 | 0  | 2 |
| CVFDTFMPFIFC  | 0 | 0 | 0 | 0 | 0  | 2 |
| CVFDTFMPFIIC  | 0 | 0 | 0 | 0 | 2  | 2 |
| CVFDPFLPFVLC  | 0 | 0 | 1 | 4 | 11 | 2 |
| CVFDSVLPFIIC  | 0 | 0 | 0 | 0 | 5  | 2 |
| CVFDSVLPFIPC  | 0 | 0 | 0 | 0 | 1  | 2 |
| CVFDSPLPFIFC  | 0 | 0 | 0 | 3 | 8  | 2 |
| CVFHLFLPFIYC  | 0 | 0 | 0 | 0 | 0  | 2 |
| CVFESLFPFIFC  | 0 | 0 | 0 | 0 | 0  | 2 |
| CVFGLFLPFILC  | 0 | 0 | 0 | 0 | 0  | 2 |
| CVFDVFSPPFIFC | 0 | 0 | 0 | 3 | 6  | 2 |
| CVFGSFLPFIPC  | 0 | 0 | 0 | 0 | 2  | 2 |
| CVFGSLLPFIFC  | 0 | 0 | 0 | 1 | 1  | 2 |
| CVFGSWLPFVYC  | 0 | 0 | 0 | 0 | 2  | 2 |
| CVFHSFLPFVLC  | 0 | 0 | 0 | 0 | 1  | 2 |
| CVFDTMLPFIFC  | 0 | 0 | 0 | 0 | 0  | 2 |
| CVFNLFPLPFTFC | 0 | 0 | 0 | 0 | 1  | 2 |
| CVFNSFLPFIPC  | 0 | 0 | 0 | 0 | 1  | 2 |
| CVFNSFLPFVLC  | 0 | 0 | 0 | 0 | 6  | 2 |
| CVFGSFLPFVLC  | 0 | 0 | 0 | 4 | 8  | 2 |
| CVFDVFCQFIFC  | 0 | 0 | 0 | 4 | 9  | 2 |

|               |   |   |   |   |    |   |
|---------------|---|---|---|---|----|---|
| CVFDVFCPFIFR  | 0 | 0 | 0 | 1 | 2  | 2 |
| CVFDLFLSFIIC  | 0 | 0 | 0 | 0 | 0  | 2 |
| CVFDLFMPYIVC  | 0 | 0 | 0 | 0 | 0  | 2 |
| CVYDSFLPFIVC  | 0 | 0 | 0 | 0 | 0  | 2 |
| CVYDIYEPFINC  | 0 | 0 | 0 | 0 | 0  | 2 |
| CVYDIFVPINIC  | 0 | 0 | 0 | 0 | 0  | 2 |
| CVYDIFEPFIMC  | 0 | 0 | 0 | 1 | 0  | 2 |
| CVYDIFCPFILC  | 0 | 0 | 0 | 0 | 0  | 2 |
| CVYDFFLPFIYC  | 0 | 0 | 0 | 1 | 2  | 2 |
| CVFVFCPPFIFC  | 0 | 0 | 0 | 0 | 5  | 2 |
| CVHDLFLPFIPC  | 0 | 0 | 0 | 0 | 1  | 2 |
| CVIDSFLPFIPC  | 0 | 0 | 0 | 0 | 1  | 2 |
| CVIDSFMPFIIC  | 0 | 0 | 0 | 0 | 1  | 2 |
| CVIDVFCPFIFC  | 0 | 0 | 0 | 1 | 5  | 2 |
| CVLDLFLPFILC  | 0 | 0 | 0 | 0 | 0  | 2 |
| CVLDLFLPFIPC  | 0 | 0 | 0 | 0 | 1  | 2 |
| CVNDIFVPPFIFC | 0 | 0 | 0 | 1 | 0  | 2 |
| CVSDIFIPFVLC  | 0 | 0 | 0 | 1 | 7  | 2 |
| CVSDSLLPFIFC  | 0 | 0 | 0 | 1 | 4  | 2 |
| CVYDIYVPFIFC  | 0 | 0 | 0 | 0 | 0  | 2 |
| CVYDISVPFILC  | 0 | 0 | 0 | 0 | 0  | 2 |
| CVFDPFLPFIPC  | 0 | 0 | 0 | 0 | 2  | 2 |
| CVYDISVPFIFC  | 0 | 0 | 0 | 0 | 1  | 2 |
| CYFDPHFIFIPW  | 0 | 0 | 0 | 1 | 0  | 2 |
| CYFDPHFIFINC  | 0 | 0 | 0 | 0 | 1  | 2 |
| CYFDPHFIFIIC  | 0 | 0 | 0 | 1 | 2  | 2 |
| CVYDIFLPFIPC  | 0 | 0 | 0 | 0 | 0  | 2 |
| CVYDIFVAFIIC  | 0 | 0 | 0 | 0 | 1  | 2 |
| CVYDIFVLFIFC  | 0 | 0 | 0 | 0 | 2  | 2 |
| CVYDIFVPPFFC  | 0 | 0 | 0 | 0 | 1  | 2 |
| CVYDIFVPFIFS  | 0 | 0 | 0 | 0 | 0  | 2 |
| CVYDIFVPFIIG  | 0 | 0 | 0 | 0 | 1  | 2 |
| CVYDIFVPFTLC  | 0 | 0 | 0 | 0 | 0  | 2 |
| CVYDIFLHFIIC  | 0 | 0 | 0 | 0 | 0  | 2 |
| CVYDIFVPFVLC  | 0 | 0 | 0 | 0 | 12 | 2 |
| CVYDIFVTFIFC  | 0 | 0 | 0 | 0 | 0  | 2 |
| CVYDIIVPFINC  | 0 | 0 | 0 | 0 | 1  | 2 |
| CVYDILVPFILC  | 0 | 0 | 0 | 0 | 2  | 2 |
| CWDLFVPYIVC   | 0 | 0 | 0 | 0 | 0  | 2 |
| CWDSFVPPFIPC  | 0 | 0 | 0 | 0 | 4  | 2 |
| CWDSFVPPFIVC  | 0 | 0 | 0 | 0 | 4  | 2 |
| CVYIFVQFIIC   | 0 | 0 | 0 | 0 | 0  | 2 |
| CVYVFLPFIFC   | 0 | 0 | 0 | 0 | 1  | 2 |
| CVYDWFLPFIYC  | 0 | 0 | 0 | 1 | 2  | 2 |
| CVYDLFLPFLLC  | 0 | 0 | 0 | 0 | 9  | 2 |
| CVYDLFLPFVFC  | 0 | 0 | 0 | 0 | 10 | 2 |
| CVYDLFLPFVIC  | 0 | 0 | 0 | 0 | 11 | 2 |
| CVYDLFLSFIFC  | 0 | 0 | 0 | 0 | 0  | 2 |
| CVYDLFLSFIPC  | 0 | 0 | 0 | 0 | 0  | 2 |
| CVYDLFMPFIFC  | 0 | 0 | 0 | 0 | 2  | 2 |
| CVYDLSLPPFIFC | 0 | 0 | 0 | 0 | 9  | 2 |
| CVYDLSLPPFIPC | 0 | 0 | 0 | 0 | 3  | 2 |

|               |   |   |   |   |    |   |
|---------------|---|---|---|---|----|---|
| CVYDLYLPFIFC  | 0 | 0 | 0 | 0 | 4  | 2 |
| CVYDLYMPFIYC  | 0 | 0 | 0 | 1 | 1  | 2 |
| CVYDSFLPFINC  | 0 | 0 | 0 | 0 | 0  | 2 |
| CYFDPHFIFC    | 0 | 0 | 0 | 0 | 15 | 2 |
| CYFDLFVPPFIFC | 0 | 0 | 0 | 0 | 0  | 2 |
| CYFDIFPPPFIYC | 0 | 0 | 0 | 3 | 3  | 2 |
| CVYDIYVPFIPC  | 0 | 0 | 0 | 1 | 0  | 2 |
| CTFNLFPFIFC   | 0 | 0 | 0 | 0 | 1  | 2 |
| CVYDLFLFIFC   | 0 | 0 | 0 | 1 | 1  | 2 |
| CVYDLFLPFIFC  | 0 | 0 | 0 | 0 | 0  | 2 |
| CVYYLFLPFIFC  | 0 | 0 | 0 | 0 | 1  | 2 |
| CYFDPHFIFIQC  | 0 | 0 | 0 | 0 | 3  | 2 |
| SIFDLFVPPFIFC | 0 | 0 | 0 | 0 | 3  | 2 |
| SIFDIHMPFTPC  | 0 | 0 | 0 | 0 | 1  | 2 |
| GIFDTFLPFIFC  | 0 | 0 | 0 | 1 | 2  | 2 |
| FIFDIFMPFIIC  | 0 | 0 | 0 | 0 | 0  | 2 |
| RCFDIFLPFIFC  | 0 | 0 | 0 | 0 | 1  | 2 |
| CYFDPHFIFIPC  | 0 | 0 | 0 | 4 | 9  | 2 |
| CYFDPHFNFIFC  | 0 | 0 | 0 | 0 | 3  | 2 |
| CYFDPYFIFIPC  | 0 | 0 | 0 | 2 | 5  | 2 |
| CYFDSFLPFVIC  | 0 | 0 | 0 | 0 | 2  | 2 |
| CYFDTHFIFITC  | 0 | 0 | 0 | 0 | 1  | 2 |
| FVFDVFCPPFIFC | 0 | 0 | 0 | 0 | 2  | 2 |
| FLFDTFVPPFIFC | 0 | 0 | 0 | 1 | 2  | 2 |
| FLFDSFLPFIFC  | 0 | 0 | 0 | 0 | 0  | 2 |
| CVFNVFCPPFIFC | 0 | 0 | 0 | 1 | 8  | 2 |
| FLFDLFCPPFIFC | 0 | 0 | 0 | 2 | 4  | 2 |
| CYYDPHFIFIPS  | 0 | 0 | 0 | 0 | 0  | 2 |
| FIFDNWLPFIFC  | 0 | 0 | 0 | 0 | 0  | 2 |
| FIFDTFLPFILC  | 0 | 0 | 0 | 0 | 1  | 2 |
| SIFDIFMPFIPC  | 0 | 0 | 0 | 0 | 1  | 2 |
| SLFDTFVPPFIFC | 0 | 0 | 0 | 1 | 2  | 2 |
| SLFDTFLPFIFC  | 0 | 0 | 0 | 2 | 2  | 2 |
| SIFDTFLPFIFC  | 0 | 0 | 0 | 0 | 1  | 2 |
| RFYDLFLPFIFC  | 0 | 0 | 0 | 2 | 4  | 2 |
| RIFDIFMPFIFC  | 0 | 0 | 0 | 0 | 2  | 2 |
| RIFDNWLPFIFC  | 0 | 0 | 0 | 0 | 0  | 2 |
| RISDIHMPFIFC  | 0 | 0 | 0 | 0 | 0  | 2 |
| RIWDSFVPFILC  | 0 | 0 | 0 | 0 | 7  | 2 |
| RLFDLFCPPFIFC | 0 | 0 | 1 | 0 | 0  | 2 |
| RLFDSFLPFILC  | 0 | 0 | 0 | 0 | 3  | 2 |
| RVFDIFIPFVLC  | 0 | 0 | 0 | 0 | 1  | 2 |
| RVFDSWLPFVFC  | 0 | 0 | 0 | 0 | 0  | 2 |
| RVFDTFLPFIFC  | 0 | 0 | 0 | 0 | 0  | 2 |
| RVFDVFCPPFIFC | 0 | 0 | 0 | 1 | 9  | 2 |
| SIFDIFMPFIFC  | 0 | 0 | 0 | 0 | 0  | 2 |
| CLFDPFCPPILC  | 0 | 0 | 0 | 2 | 3  | 2 |
| YVYDIFVPPFIIC | 0 | 0 | 0 | 0 | 5  | 2 |
| SVYDLFLPFIFC  | 0 | 0 | 0 | 2 | 4  | 2 |
| RCFDSFLPFIFC  | 0 | 0 | 0 | 1 | 4  | 2 |
| SVFDSFLPFIFC  | 0 | 0 | 0 | 0 | 2  | 2 |
| SVYDIFVPPFIFC | 0 | 0 | 0 | 0 | 0  | 2 |

|               |   |   |   |   |   |   |
|---------------|---|---|---|---|---|---|
| WIFDTFLPFIFC  | 0 | 0 | 0 | 0 | 1 | 2 |
| YVFDLFLPFIFC  | 0 | 0 | 0 | 0 | 0 | 2 |
| WVYDIFVPPFIIC | 0 | 0 | 0 | 0 | 1 | 2 |
| STFDIFLPFILC  | 0 | 0 | 0 | 1 | 4 | 2 |
| YIWDLFLPFIFC  | 0 | 0 | 0 | 0 | 0 | 2 |
| YLFDFLPFIFC   | 0 | 0 | 0 | 1 | 4 | 2 |
| YLFDSFLPFILC  | 0 | 0 | 0 | 0 | 1 | 2 |
| YTFDLFLPFILC  | 0 | 0 | 0 | 0 | 0 | 2 |
| YYFDPHFIFIPC  | 0 | 0 | 0 | 2 | 3 | 2 |
